# Supplementary material for: Chemo- and regioselective oxygenation of C(sp3)–H bonds in aliphatic alcohols using a covalently bound directing activator and atmospheric oxygen
Source: PubMed Central journal article supplement (PMC5965247; doi:10.1039/c5sc04476f), 2015-11-27

## Supporting Information

### Chemo- and Regioselective Oxygenation of C(sp<sup>3</sup>)-H Bonds in Aliphatic Alcohols Using a Covalently Bound Directing Activator and Atmospheric Oxygen

Jun Ozawa, Masayuki Tashiro, Jizhi Ni, Kounosuke Oisaki,\* and Motomu Kanai\*

*Graduate School of Pharmaceutical Sciences, The University of Tokyo*

*Kanai Life Science Catalysis Project, ERATO, Japan Science Technology Agency,*

*7-3-1, Hongo, Bunkyo-ku, Tokyo 113-0033, Japan.*

Phone: +81-3-5841-4835 (Oisaki); +81-3-5841-4830 (Kanai)

Fax: +81-3-5684-5206

Email: oisaki@mol.f.u-tokyo.ac.jp (Oisaki); kanai@mol.f.u-tokyo.ac.jp (Kanai)

#### Contents

|                                                                                           |     |
|-------------------------------------------------------------------------------------------|-----|
| 1. General method .....                                                                   | S2  |
| 2. Typical experimental procedure.....                                                    | S3  |
| 3. Typical synthetic procedure for directing-activator-anchored alcohols .....            | S5  |
| 4. The procedure for gram-scale oxidation and the removal of the directing activator..... | S11 |
| 5. Experimental details .....                                                             | S15 |
| 6. Selective ultra-remote C-H oxygenation .....                                           | S19 |
| 7. Analytical data.....                                                                   | S24 |

## 1. General method

$^1\text{H}$  NMR spectra were recorded on JEOL ECX-500 (500.16 MHz for  $^1\text{H}$  NMR and 125.77 MHz for  $^{13}\text{C}$  NMR), and JEOL ECS-400 (391.78 MHz for  $^1\text{H}$  NMR, 98.52 MHz for  $^{13}\text{C}$  NMR, 125.70 MHz for  $^{11}\text{B}$  NMR, and 368.64 MHz for  $^{19}\text{F}$  NMR) spectrometers. Chemical shifts were reported downfield from tetramethylsilane ( $\delta = 0$  ppm) for  $^1\text{H}$  NMR. For  $^1\text{H}$  and  $^{13}\text{C}$  NMR, chemical shifts were reported in the scale relative to the solvent used as an internal reference ( $\delta = 7.26$  and  $77.00$  ppm ( $\text{CDCl}_3$ ),  $2.04$  and  $29.80$  ppm ( $\text{acetone-}d_6$ );  $^1\text{H}$  and  $^{13}\text{C}$  NMR respectively). Chemical shifts for  $^{11}\text{B}$  NMR and  $^{19}\text{F}$  NMR were reported in the scale relative to  $\text{PhB}(\text{OH})_2$  ( $\delta = 31.00$  ppm) and  $\text{C}_6\text{F}_6$  ( $\delta = -164.90$  ppm) respectively as an external standard. Infrared (IR) spectra were recorded on a JASCO FT/IR 410 Fourier transform infrared spectrophotometer. ESI-MS spectra were measured on a Waters ZQ4000 spectrometer (for LRMS), and a JEOL JMS-T100LC AccuTOF spectrometer (for HRMS). Column chromatography was performed with silica gel Merck 60 (230-400 mesh ASTM). Gel permeation chromatography (GPC) purification was conducted on a Japan Analytical Industry Co., Ltd. LC9210NEXT equipped with JAIGEL-1H and JAIGEL-2H, and  $\text{CHCl}_3$  was used as an eluent. HPLC was conducted by JASCO HPLC systems (pump: PU-2080; detector: UV-2075, measured at 254 nm). All reactions other than substrates synthesis were carried out in normal solvents without any purification (purchased from Aldrich or Wako Pure Chemical Industries, Ltd.) unless otherwise noted. Reagents whose preparations are not described in this manuscript were purchased from Aldrich, Tokyo Chemical Industry Co., Ltd. (TCI), Kanto Chemical Co., Inc., and Wako Pure Chemical Industries, Ltd., and used without further purification except for triethylamine, which was distilled from  $\text{CaH}_2$ . NMR yields were calculated by  $^1\text{H}$  NMR of crude products using 1,1,2,2-tetrachloroethane as an internal standard. The oxygenated compounds **2a**, **2d** + **2d'**, **2h**, **2i**, **2k**, **2m**, and **2s** were isolated by silica gel column chromatography (eluent: hexane/EtOAc); other products were isolated by preparative TLC (eluent: hexane/EtOAc).



1.69 (dt, 1H,  $J = 14.9$  Hz, 4.1 Hz), 1.37 (s, 3H), 1.25 (s, 3H);  $^{13}\text{C}$  NMR (126 MHz,  $\text{CDCl}_3$ )  $\delta$ : 164.9, 134.4, 133.0, 131.6, 130.3, 124.1, 124.0, 121.8 (q,  $J = 286.7$  Hz), 90.9 (q,  $J = 32.4$  Hz), 70.7, 60.8, 40.9, 30.0;  $^{19}\text{F}$  NMR (369 MHz,  $\text{CDCl}_3$ )  $\delta$ : -78.2; IR (neat,  $\text{cm}^{-1}$ )  $\nu$ : 3395, 3172, 2972, 1722, 1470, 1381, 1305, 1199; LRMS (ESI):  $m/z$  342  $[\text{M}+\text{Na}]^+$ ; HRMS (ESI):  $m/z$  calcd for  $\text{C}_{14}\text{H}_{16}\text{F}_3\text{NO}_4\text{Na}$   $[\text{M}+\text{Na}]^+$  342.0924, Found 342.0921.



### 3. Typical synthetic procedure for directing-activator-anchored alcohols

Procedure A: for all the substrates except for ones listed bellow

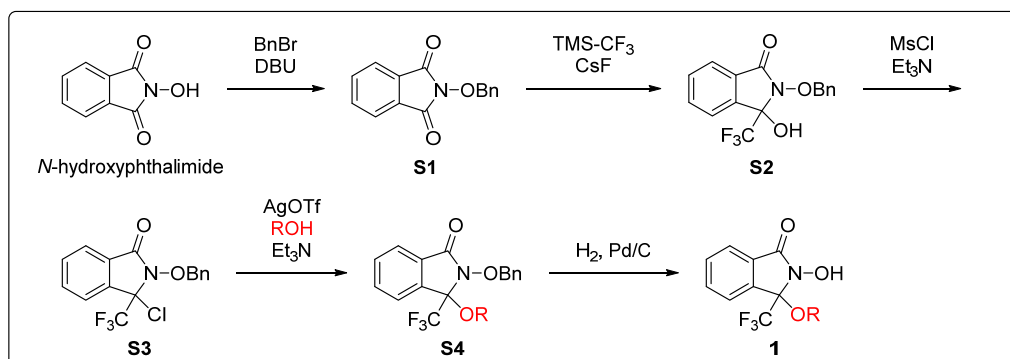

Procedure B: for **1o**, **1v**, **1x**, **1aa**, **1ab**, **1ac** and **1ad**

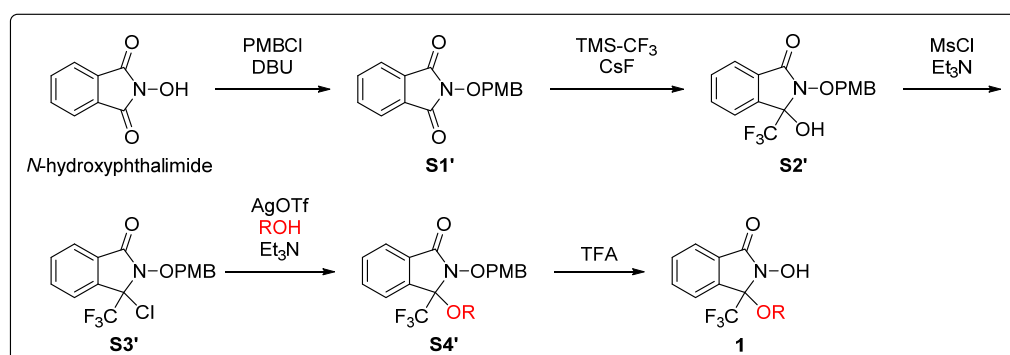

Procedure C: for **1p**

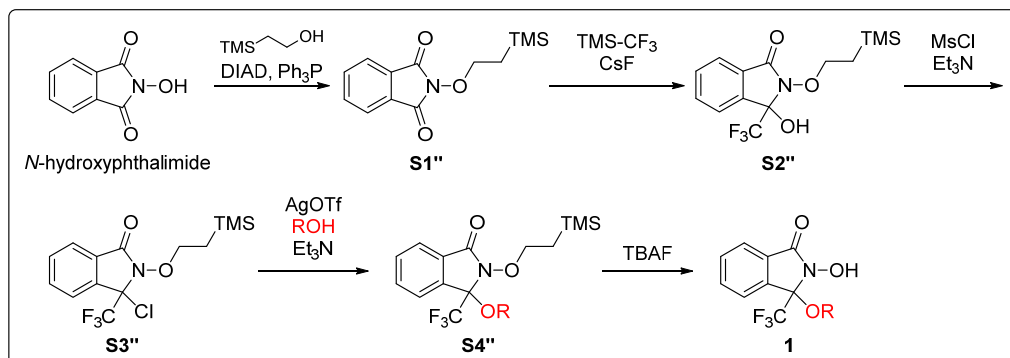

#### Typical experimental procedure for Procedure A: *O*-benzyl-*N*-hydroxyphthalimide (**S1**)

To a stirred mixture of *N*-hydroxyphthalimide (97.8 g, 600 mmol, 1 eq) and benzyl bromide (79 mL, 660 mmol, 1.1 eq) in DMF (1.2 L, 0.5 M) was added DBU (108 mL, 720 mmol, 1.2 eq) over 30 minutes at ambient temperature. After completion of the addition, 2.4 L of HCl (1 N in water) was added, and the white precipitate was filtered off and washed with water to afford wet **S1**. Azeotropic removal of remained water with toluene (twice) afforded **S1** as white solid (147.6 g, 97% yield).

$^1\text{H}$  NMR (500 MHz,  $\text{CDCl}_3$ )  $\delta$ : 7.80 (dd, 2H,  $J = 2.9$  Hz, 5.2 Hz), 7.72 (dd, 2H,  $J = 2.9$  Hz, 5.2 Hz), 7.53 (dd, 2H,  $J = 4.0$  Hz, 7.5 Hz), 7.36-7.40 (m, 3H), 5.21 (s, 2H);  $^{13}\text{C}$  NMR (126 MHz,  $\text{CDCl}_3$ )  $\delta$ : 163.4, 134.4, 133.6, 129.8, 129.3, 128.8, 128.5, 123.4, 79.8; IR (KBr,  $\text{cm}^{-1}$ )  $\nu$ : 3076, 3034, 2954, 2887, 1789, 1731, 1464; LRMS (ESI):  $m/z$  276  $[\text{M}+\text{Na}]^+$ ; HRMS (ESI):  $m/z$  calcd for  $\text{C}_{15}\text{H}_{11}\text{NO}_3\text{Na}$   $[\text{M}+\text{Na}]^+$  276.0631,

Found 276.0630.

### ***N*-benzyloxy-3-hydroxy-3-trifluoromethyl-isoindolinone (S2)**

To a stirred mixture of **S1** (139 g, 550 mmol, 1 eq) and TMSCF<sub>3</sub> (98 mL, 660 mmol, 1.2 eq) in dry DMF (550 mL, 1 M) was added CsF (100 g, 660 mmol, 1.2 eq) at 0 °C, and the reaction mixture was stirred for one hour. 1 N HCl aq. (500 mL) was added and the mixture was extracted with ethyl acetate/hexane (1/1). The organic layer was washed with water and saturated NaCl aq. solution, and dried over Na<sub>2</sub>SO<sub>4</sub>. The solution was passed through short silica gel pad and evaporation of the solvent afforded **S2** as light yellow solid (169.3 g, 95% yield). **S2** was used in the next step without further purification.

<sup>1</sup>H NMR (500 MHz, acetone-*d*<sub>6</sub>) δ: 7.78-7.85 (m, 3H), 7.72-7.76 (m, 1H), 7.59 (d, 2H, *J* = 7.5 Hz), 7.37-7.45 (m, 3H), 5.34 (d, 1H, *J* = 9.8 Hz), 5.22 (d, 1H, *J* = 9.8 Hz); <sup>13</sup>C NMR (126 MHz, acetone-*d*<sub>6</sub>) δ: 164.9, 139.1, 136.0, 134.5, 132.5, 130.2, 130.0, 129.5, 129.1, 125.0, 124.2, 123.9 (q, *J* = 286.7 Hz), 88.0 (q, *J* = 32.4 Hz), 80.5; <sup>19</sup>F NMR (369 MHz, acetone-*d*<sub>6</sub>) δ: -79.5; IR (KBr, cm<sup>-1</sup>) ν: 3223, 3031, 1719, 1618, 1470, 1378, 1261, 1195; LRMS (ESI): *m/z* 346 [M+Na]<sup>+</sup>; HRMS (ESI): *m/z* calcd for C<sub>16</sub>H<sub>12</sub>F<sub>3</sub>NO<sub>3</sub>Na [M+Na]<sup>+</sup> 346.0662, Found 346.0674.

### ***N*-benzyloxy-3-chloro-3-trifluoromethyl-isoindolinone (S3)**

To a stirred mixture of **S2** (169 g, 523 mmol, 1 eq) and triethylamine (117 mL, 836 mmol, 1.6 eq) in CH<sub>2</sub>Cl<sub>2</sub> (45 mL, 1 M) was added methanesulfonyl chloride (61 mL, 784 mmol, 1.5 eq) at 0 °C. The mixture was stirred for three hours before water was added. The separated organic layer was washed with water and saturated NaCl aq. solution, and dried over Na<sub>2</sub>SO<sub>4</sub>. The solution was passed through short silica gel pad, and evaporation of the solvent afforded **S3** as light yellow liquid (179 g, 100% yield). For practical use, **S3** is stored as 1 M solution in heptane, or **S3** is solidified by seeding.

<sup>1</sup>H NMR (400 MHz, CDCl<sub>3</sub>) δ: 7.90 (d, 1H, *J* = 7.2 Hz), 7.71-7.76 (m, 2H), 7.63-7.70 (m, 1H), 7.55-7.61 (m, 2H), 7.37-7.46 (m, 3H), 5.41 (d, 1H, *J* = 9.4 Hz), 5.25 (d, 1H, *J* = 9.4 Hz); <sup>13</sup>C NMR (126 MHz, CDCl<sub>3</sub>) δ: 164.5, 137.9, 134.2, 133.9, 131.8, 129.6, 129.1, 128.5, 127.3, 124.4, 124.1, 121.7 (q, *J* = 284.3 Hz), 79.7, 79.5 (q, *J* = 36.4 Hz); <sup>19</sup>F NMR (369 MHz, CDCl<sub>3</sub>) δ: -75.8; IR (neat, cm<sup>-1</sup>) ν: 1755, 1469, 1258, 1197; LRMS (ESI): *m/z* 364 [M+Na]<sup>+</sup>; HRMS (ESI): *m/z* calcd for C<sub>16</sub>H<sub>11</sub>ClF<sub>3</sub>NO<sub>2</sub>Na [M+Na]<sup>+</sup> 364.0323, Found 364.0325.

### ***N*-benzyloxy-3-butoxy-3-trifluoromethyl-isoindolinone (S4a)**

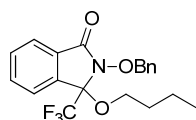

To a light-protected mixture of AgOTf (6.9 g, 26.7 mmol, 1.5 eq), 1-butanol (2.0 mL, 21.4 mmol, 1.2 eq), and triethylamine (3.2 mL, 23.1 mmol, 1.3 eq) in toluene (17.8 mL) was added **S3** (1 M solution in toluene, 17.8 mL, 17.8 mmol, 1 eq) at ambient temperature. The reaction mixture was stirred overnight and saturated NaCl aq. solution was added. After filtration over Celite pad to remove the silver salts, the organic layer was separated, washed with water and saturated NaCl aq. solution, and dried over Na<sub>2</sub>SO<sub>4</sub>.

Evaporating the solvent afforded the crude oily liquid. Purification by silica gel column chromatography (hexane/EtOAc = 10/1) afforded **S4a** (R = Bu) as slightly yellow liquid (5.7 g, 84%).

$^1\text{H}$  NMR (500 MHz,  $\text{CDCl}_3$ )  $\delta$ : 7.90 (d, 1H,  $J = 7.7$  Hz), 7.69 (dd, 1H,  $J = 6.9$  Hz, 7.8 Hz), 7.60-7.66 (m, 2 H), 7.57 (d, 2H,  $J = 6.9$  Hz), 7.35-7.43 (m, 3H), 5.32 (d, 1H,  $J = 9.8$  Hz), 5.16 (d, 1H,  $J = 9.8$  Hz), 3.28 (dt, 1H,  $J = 8.6$  Hz, 6.3 Hz), 2.95 (dt, 1H,  $J = 8.6$  Hz, 6.3 Hz), 1.44-1.59 (m, 2H), 1.23-1.39 (m, 2H), 0.83 (t, 3H,  $J = 7.2$  Hz);  $^{13}\text{C}$  NMR (126 MHz,  $\text{CDCl}_3$ )  $\delta$ : 165.6, 135.3, 134.6, 133.4, 131.6, 130.0, 129.3, 128.8, 128.4, 124.2, 124.1, 122.2 (q,  $J = 286.7$  Hz), 91.0 (q,  $J = 32.4$  Hz), 79.1, 63.8, 31.0, 18.9, 13.6;  $^{19}\text{F}$  NMR (369 MHz,  $\text{CDCl}_3$ )  $\delta$ : -78.1; IR (neat,  $\text{cm}^{-1}$ )  $\nu$ : 2960, 1746, 1468, 1294, 1195; LRMS (ESI):  $m/z$  402  $[\text{M}+\text{Na}]^+$ ; HRMS (ESI):  $m/z$  calcd for  $\text{C}_{20}\text{H}_{20}\text{F}_3\text{NO}_3\text{Na}$   $[\text{M}+\text{Na}]^+$  402.1288, Found 402.1284.

### 3-butoxy-*N*-hydroxy-3-trifluoromethyl-isoindolinone (**1a**)

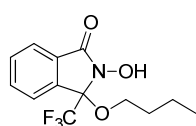

A stirred mixture of **S4a** (2.6 g, 6.8 mmol, 1 eq) and Pd/C (10 wt%, 362 mg, 0.34 mmol, 0.05 eq) in ethanol (14 mL, 0.5 M) was exposed to  $\text{H}_2$  (balloon pressure) at ambient temperature. The reaction mixture was stirred for two hours and then  $\text{H}_2$  was removed. Filtration over Celite pad and evaporation of the filtrate afforded a crude oily liquid. Purification by silica gel column chromatography (hexane/EtOAc = 4/1) afforded **1a** as slightly orange liquid. The liquid was gradually solidified into white solid (1.8 g, 92%).

$^1\text{H}$  NMR (500 MHz,  $\text{CDCl}_3$ )  $\delta$ : 9.88 (s, 1H), 7.79 (d, 1H,  $J = 7.8$  Hz), 7.66 (dd, 1H,  $J = 7.4$  Hz, 6.9 Hz), 7.61 (d, 1H,  $J = 7.4$  Hz), 7.60 (dd, 1H,  $J = 6.9$  Hz, 7.8 Hz), 3.43 (dt, 1H,  $J = 8.6$  Hz, 6.6 Hz), 2.98 (dt, 1H,  $J = 8.6$  Hz, 6.6 Hz), 1.54-1.68 (m, 2H), 1.29-1.46 (m, 2H), 0.88 (t, 3H,  $J = 7.2$  Hz);  $^{13}\text{C}$  NMR (126 MHz,  $\text{CDCl}_3$ )  $\delta$ : 165.9, 135.3, 133.2, 131.5, 130.0, 124.0, 123.8, 121.9 (q,  $J = 286.7$  Hz), 91.0 (q,  $J = 32.4$  Hz), 64.1, 31.1, 19.0, 13.7;  $^{19}\text{F}$  NMR (369 MHz,  $\text{CDCl}_3$ )  $\delta$ : -78.5; IR (KBr,  $\text{cm}^{-1}$ )  $\nu$ : 3435, 3136, 2964, 1878, 1719, 1472, 1305, 1201; LRMS (ESI):  $m/z$  312  $[\text{M}+\text{Na}]^+$ ; HRMS (ESI):  $m/z$  calcd for  $\text{C}_{13}\text{H}_{14}\text{F}_3\text{NO}_3\text{Na}$   $[\text{M}+\text{Na}]^+$  312.0818, Found 312.0831.

### Typical experimental procedure for Procedure B

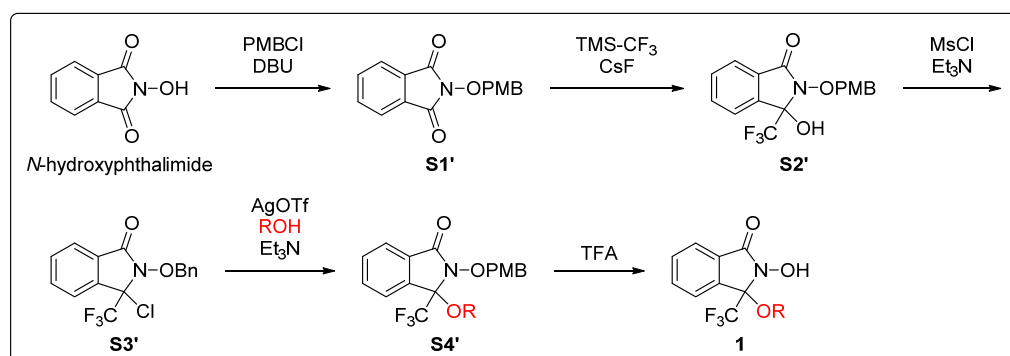

### *O*-(4-methoxybenzyl)-*N*-hydroxyphthalimide (**S1'**)

To a stirred mixture of *N*-hydroxyphthalimide (8.16 g, 50 mmol, 1 eq) and DBU (9.7 mL, 65 mmol, 1.3 eq) in DMF (50 mL, 1 M) was added 4-methoxybenzyl chloride (6.6 mL, 55 mmol, 1.1 eq) at 0 °C. After two hours, 100 mL of HCl (1 N in water) was added. White precipitate was filtered off, washed with cold water, and then dissolved in CH<sub>2</sub>Cl<sub>2</sub>. Drying the solution over Na<sub>2</sub>SO<sub>4</sub> and evaporating the solvent afforded **S1'** as white solid (11.0 g, 78% yield).

<sup>1</sup>H NMR (500 MHz, CDCl<sub>3</sub>) δ: 7.79 (dd, 2H, *J* = 5.4 Hz, 3.2 Hz), 7.72 (dd, 2H, *J* = 5.4 Hz, 3.2 Hz), 7.44 (d, 2H, *J* = 8.6 Hz), 6.88 (d, 2H, *J* = 8.6 Hz), 5.14 (s, 2H), 3.79 (s, 3H); <sup>13</sup>C NMR (126 MHz, CDCl<sub>3</sub>) δ: 163.5, 160.4, 134.3, 131.6, 128.9, 125.8, 123.4, 113.9, 79.4, 55.2; IR (KBr, cm<sup>-1</sup>) ν: 2945, 1725, 1611, 1516, 1386, 1259; LRMS (ESI): *m/z* 306 [M+Na]<sup>+</sup>; HRMS (ESI): *m/z* calcd for C<sub>16</sub>H<sub>13</sub>NO<sub>4</sub>Na [M+Na]<sup>+</sup> 306.0737, Found 306.0745.

### 3-hydroxy-*N*-((4-methoxybenzyl)oxy)-3-(trifluoromethyl)isoindolinone (**S2'**)

The same procedure as the conversion of **S1** to **S2** afforded **S2'** as light yellow solid (13 g, 97%) from 11 g of **S1'**. **S2'** was also used in the next step without further purification.

<sup>1</sup>H NMR (500 MHz, acetone-*d*<sub>6</sub>) δ: 7.76-7.84 (m, 3H), 7.70-7.75 (m, 1H), 7.51 (d, 2H, *J* = 8.0 Hz), 6.97 (d, 2H, *J* = 8.0 Hz), 5.26 (d, 1H, *J* = 9.2 Hz), 5.14 (d, 1H, *J* = 9.2 Hz), 3.82 (s, 3H); <sup>13</sup>C NMR (126 MHz, acetone-*d*<sub>6</sub>) δ: 164.8, 161.1, 139.2, 134.4, 132.4, 132.0, 130.2, 128.1, 124.9, 124.2, 123.9 (q, *J* = 286.7 Hz), 114.5, 88.0 (q, *J* = 32.8 Hz), 80.2, 55.5; <sup>19</sup>F NMR (369 MHz, acetone-*d*<sub>6</sub>) δ: -79.5; IR (KBr, cm<sup>-1</sup>) ν: 3233, 1703, 1616, 1517, 1254, 1200; LRMS (ESI): *m/z* 376 [M+Na]<sup>+</sup>; HRMS (ESI): *m/z* calcd for C<sub>17</sub>H<sub>14</sub>F<sub>3</sub>NO<sub>4</sub>Na [M+Na]<sup>+</sup> 376.0767, Found 376.0773.

### 3-chloro-*N*-((4-methoxybenzyl)oxy)-3-(trifluoromethyl)isoindolinone (**S3'**)

The same procedure as the conversion of **S2** to **S3** afforded **S3'** as yellow solid (11 g, 79%) from 13 g of **S2'**.

<sup>1</sup>H NMR (400 MHz, CDCl<sub>3</sub>) δ: 7.89 (d, 1H, *J* = 7.6 Hz), 7.62-7.77 (m, 3H), 7.50 (d, 2H, *J* = 8.5 Hz), 6.94 (d, 2H, *J* = 8.5 Hz), 5.33 (d, 1H, *J* = 9.0 Hz), 5.17 (d, 1H, *J* = 9.0 Hz), 3.82 (s, 3H); <sup>13</sup>C NMR (100 MHz, CDCl<sub>3</sub>) δ: 164.5, 160.3, 137.9, 134.1, 131.8, 131.5, 127.4, 126.2, 124.4, 124.1, 121.7 (q, *J* = 284.4 Hz), 113.9, 79.6 (q, *J* = 36.3 Hz), 79.4, 55.2; <sup>19</sup>F NMR (369 MHz, CDCl<sub>3</sub>) δ: -75.7; IR (KBr, cm<sup>-1</sup>) ν: 1755, 1612, 1517, 1199; LRMS (ESI): *m/z* 394 [M+Na]<sup>+</sup>; HRMS (ESI): *m/z* calcd for C<sub>17</sub>H<sub>13</sub>ClF<sub>3</sub>NO<sub>3</sub>Na [M+Na]<sup>+</sup> 394.0428, Found 394.0425.

### *N*-((4-methoxybenzyl)oxy)-3-(oct-4-yn-1-yloxy)-3-trifluoromethyl-isoindolinone (**S4'aa**)

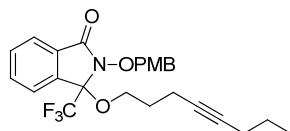

The same procedure as the conversion of **S3** to **S4a** afforded **S4'aa** as light yellow liquid (256.6 mg, 60%) from 116.1 mg of **S3'**.

<sup>1</sup>H NMR (400 MHz, CDCl<sub>3</sub>) δ: 7.87-7.92 (m, 1H), 7.60-7.71 (m, 3H), 7.45-7.51 (m, 2H), 6.90-6.95 (m,

2H), 5.25 (d, 1H,  $J = 9.4$  Hz), 5.08 (d, 1H,  $J = 9.4$  Hz), 3.82 (s, 3H), 3.38 (dt, 1H,  $J = 8.5$  Hz, 5.7 Hz), 3.04-3.13 (m, 1H), 2.17-2.29 (m, 2H), 1.95-2.01 (m, 2H), 1.61-1.80 (m, 2H), 1.32-1.42 (m, 2H), 0.86 (t, 3H,  $J = 7.4$  Hz);  $^{13}\text{C}$  NMR (100 MHz,  $\text{CDCl}_3$ )  $\delta$ : 165.3, 160.0, 134.9, 133.2, 131.5, 131.0, 130.0, 126.7, 124.2, 123.9, 122.0 (q,  $J = 286.4$  Hz), 113.6, 90.9 (q,  $J = 32.9$  Hz), 80.7, 78.7, 78.5, 62.3, 55.0, 28.3, 22.1, 20.4, 15.0, 13.2;  $^{19}\text{F}$  NMR (369 MHz,  $\text{CDCl}_3$ )  $\delta$ : -78.0; IR (neat,  $\text{cm}^{-1}$ )  $\nu$ : 2960, 1744, 1613, 1516, 1468, 1252, 1186; LRMS (ESI):  $m/z$  484  $[\text{M}+\text{Na}]^+$ ; HRMS (ESI):  $m/z$  calcd for  $\text{C}_{25}\text{H}_{26}\text{F}_3\text{NO}_4\text{Na}$   $[\text{M}+\text{Na}]^+$  484.1706, Found 484.1707.

### *N*-hydroxy-3-(oct-4-yn-1-yloxy)-3-trifluoromethyl-isoindolinone (**1aa**)

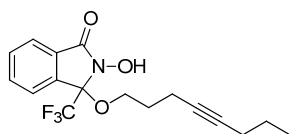

To a stirred mixture of **S4'aa** (250 mg, 0.54 mmol, 1 eq), pentamethylbenzene (326 mg, 2.2 mmol, 4 eq; a cation scavenger<sup>1</sup>) in  $\text{CH}_2\text{Cl}_2$  (3 mL, 0.2 M) was added trifluoroacetic acid (267  $\mu\text{L}$ , 10 wt% to the solvent). After half a day, saturated  $\text{NaHCO}_3$  aq. solution was added. The organic layer was washed with water and saturated  $\text{NaCl}$  aq. solution, and dried over  $\text{Na}_2\text{SO}_4$ . Evaporating the solvent afforded a crude liquid. Purification by silica gel column chromatography (hexane/ $\text{EtOAc} = 3/1$ ) afforded **1aa** (R = oct-4-yn-1-yl) as yellow liquid (151 mg, 82%).

$^1\text{H}$  NMR (500 MHz,  $\text{CDCl}_3$ )  $\delta$ : 9.28 (brs, 1H), 7.82 (d, 1H,  $J = 6.9$  Hz), 7.57-7.68 (m, 3H), 3.44-3.50 (m, 1H), 3.13-3.18 (m, 1H), 2.29-2.34 (m, 2H), 1.72-1.85 (m, 2H), 1.37-1.45 (m, 2H), 0.88 (t, 3H,  $J = 7.4$  Hz);  $^{13}\text{C}$  NMR (126 MHz,  $\text{CDCl}_3$ )  $\delta$ : 165.4, 135.0, 133.1, 131.5, 130.1, 124.2, 123.9, 121.9 (q,  $J = 286.7$  Hz), 90.9 (q,  $J = 33.2$  Hz), 81.3, 79.0, 62.5, 28.2, 22.3, 20.6, 15.1, 13.4;  $^{19}\text{F}$  NMR (369 MHz,  $\text{CDCl}_3$ )  $\delta$ : -78.4; IR (neat,  $\text{cm}^{-1}$ )  $\nu$ : 3419, 2962, 1718, 1469, 1192; LRMS (ESI):  $m/z$  364  $[\text{M}+\text{Na}]^+$ ; HRMS (ESI):  $m/z$  calcd for  $\text{C}_{17}\text{H}_{18}\text{F}_3\text{NO}_3\text{Na}$   $[\text{M}+\text{Na}]^+$  364.1131, Found 364.1138.

### Typical experimental procedure for Procedure C

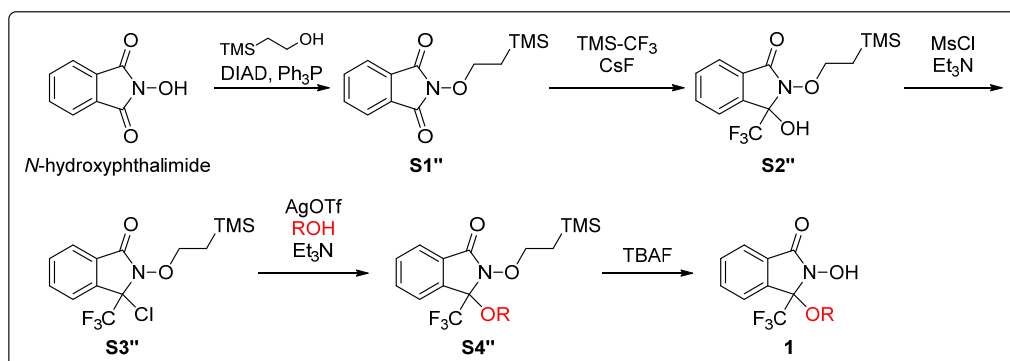

### 2-(2-(trimethylsilyl)ethoxy)isoindoline-1,3-dione (**S1''**)

<sup>1</sup> K. Okano, K.-i. Okuyama, T. Fukuyama, H. Tokuyama *Synlett* **2008**, 1977-1980.

To a stirred mixture of *N*-hydroxyphthalimide (24.5 g, 150 mmol, 1 eq), 2-trimethylsilyl ethanol (21.4 mL, 150 mmol, 1 eq), and Ph<sub>3</sub>P (43.3 g, 165 mmol, 1.1 eq) in anhydrous CHCl<sub>3</sub> (300 mL, 0.5 M) was added dropwise diethyl azodicarboxylate (2.2 M in toluene, 72 mL, 157 mmol, 1.05 eq) at 0 °C. After completion of the addition, the cold bath was removed and the mixture was allowed to stir at room temperature for about 12 hours. The reaction mixture was diluted with hexane/Et<sub>2</sub>O (5/1) and was passed through SiO<sub>2</sub>. Evaporation of the solvent afforded a crude mixture. Purification by silica gel column chromatography (hexane/ Et<sub>2</sub>O = 5/1) afforded **S1''** as gray solid (24.6 g, 62% yield).

<sup>1</sup>H NMR (500 MHz, CDCl<sub>3</sub>) δ: 7.81 (dd, 2H, *J* = 5.4 Hz, 3.2 Hz), 7.72 (dd, 2H, *J* = 5.4 Hz, 3.2 Hz), 4.23-4.28 (m, 2H), 1.16-1.22 (m, 2H), 0.04 (s, 9H); <sup>13</sup>C NMR (126 MHz, CDCl<sub>3</sub>) δ: 163.8, 134.3, 129.0, 123.4, 76.4, 17.0, -1.51; IR (neat, cm<sup>-1</sup>) ν: 2953, 1790, 1723, 1467, 1383; LRMS (ESI): *m/z* 286 [M+Na]<sup>+</sup>; HRMS (ESI): *m/z* calcd for C<sub>13</sub>H<sub>17</sub>NO<sub>3</sub>SiNa [M+Na]<sup>+</sup> 286.0870, Found 286.0869.

### 3-hydroxy-3-(trifluoromethyl)-2-(2-(trimethylsilyl)ethoxy)isoindolin-1-one (**S2''**)

The same procedure as the conversion of **S1** to **S2** afforded **S2''** as yellow solid (22.2 g, 71%) from 24.6 g of **S1''**.

<sup>1</sup>H NMR (500 MHz, CDCl<sub>3</sub>) δ: 7.75 (d, 1H, *J* = 7.4 Hz), 7.68 (d, 1H, *J* = 7.4 Hz), 7.63 (td, 1H, *J* = 7.4 Hz, 1.1 Hz), 7.57 (td, 1H, *J* = 7.4 Hz, 1.1 Hz), 4.88 (brs, 1H), 4.33-4.40 (m, 1H), 4.13-4.20 (m, 1H), 1.04-1.17 (m, 2H), 0.03 (s, 9H); <sup>13</sup>C NMR (126 MHz, CDCl<sub>3</sub>) δ: 166.5, 137.8, 133.6, 131.5, 128.9, 124.2, 123.9, 122.6 (q, *J* = 286.7 Hz), 86.3 (q, *J* = 33.6 Hz), 76.1, 17.1, -1.56; <sup>19</sup>F NMR (369 MHz, CDCl<sub>3</sub>) δ: -79.6; IR (KBr, cm<sup>-1</sup>) ν: 3125, 2957, 1698, 1473, 1380, 1254, 1203, 1174; LRMS (ESI): *m/z* 356 [M+Na]<sup>+</sup>; HRMS (ESI): *m/z* calcd for C<sub>14</sub>H<sub>18</sub>F<sub>3</sub>NO<sub>3</sub>SiNa [M+Na]<sup>+</sup> 356.0900, Found 356.0903.

### 3-chloro-3-(trifluoromethyl)-2-(2-(trimethylsilyl)ethoxy)isoindolin-1-one (**S3''**)

The same procedure as the conversion of **S2** to **S3** afforded **S3''** as yellow liquid (23.4 g, 100%) from 22.2 g of **S2''**.

<sup>1</sup>H NMR (500 MHz, CDCl<sub>3</sub>) δ: 7.85 (d, 1H, *J* = 7.4 Hz), 7.67-7.74 (m, 2H), 7.62-7.66 (m, 1H), 4.42-4.50 (m, 1H), 4.28-4.35 (m, 1H), 1.13-1.23 (m, 2H), 0.06 (s, 9H); <sup>13</sup>C NMR (126 MHz, CDCl<sub>3</sub>) δ: 164.5, 138.0, 134.0, 131.8, 127.6, 124.3, 124.1, 121.7 (q, *J* = 284.3 Hz), 79.6 (q, *J* = 36.4 Hz), 76.0, 17.1, -1.54; <sup>19</sup>F NMR (369 MHz, CDCl<sub>3</sub>) δ: -75.9; IR (neat, cm<sup>-1</sup>) ν: 1757, 1469, 1252, 1196; LRMS (ESI): *m/z* 374 [M+Na]<sup>+</sup>; HRMS (ESI): *m/z* calcd for C<sub>14</sub>H<sub>17</sub>ClF<sub>3</sub>NO<sub>2</sub>SiNa [M+Na]<sup>+</sup> 374.0561, Found 374.0567.

### 3-((3-methyloct-7-en-1-yl)oxy)-3-trifluoromethyl-*N*-(2-(trimethylsilyl)ethoxy)-isoindolinone (**S4''p**, diastereomixture)

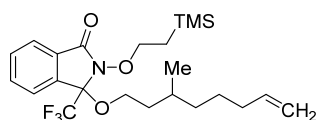

The same procedure as the conversion of **S3** to **S4a** afforded **S4''p** as colorless liquid (670.6 mg, 83%) from 619.1 mg of **S3''**.

$^1\text{H}$  NMR (500 MHz,  $\text{CDCl}_3$ )  $\delta$ : 7.87 (d, 1H + 1H,  $J = 6.9$  Hz), 7.60-7.69 (m, 2H + 2H), 7.58 (d, 1H + 1H,  $J = 7.4$  Hz), 5.72-5.82 (m, 1H + 1H), 4.90-5.00 (m, 2H + 2H), 4.33-4.40 (m, 1H + 1H), 4.15-4.22 (m, 1H + 1H), 3.30-3.38 (m, 1H + 1H), 2.93-3.01 (m, 1H + 1H), 1.95-2.05 (m, 2H + 2H), 1.49-1.68 (m, 2H + 2H), 1.00-1.44 (m, 7H + 7H), 0.81 (d, 3H,  $J = 6.9$  Hz), 0.77 (d, 3H,  $J = 6.3$  Hz), 0.06 (s, 9H + 9H);  $^{13}\text{C}$  NMR (100 MHz,  $\text{CDCl}_3$ )  $\delta$ : 165.52, 165.56, 138.93, 138.91, 135.3, 135.2, 133.2, 131.5, 130.3, 124.12, 124.07, 122.1 (q,  $J = 286.1$  Hz), 114.31, 114.28, 90.8 (q,  $J = 32.7$  Hz), 75.2, 62.4, 36.4, 36.1, 36.0, 35.9, 33.9, 29.5, 29.4, 26.1, 19.6, 19.3, 17.08, 17.05, -1.5;  $^{19}\text{F}$  NMR (369 MHz,  $\text{CDCl}_3$ )  $\delta$ : -78.3; IR (neat,  $\text{cm}^{-1}$ )  $\nu$ : 3078, 2953, 1747, 1641, 1615, 1468, 1187; LRMS (ESI):  $m/z$  480  $[\text{M}+\text{Na}]^+$ ; HRMS (ESI):  $m/z$  calcd for  $\text{C}_{23}\text{H}_{34}\text{F}_3\text{NO}_3\text{SiNa}$   $[\text{M}+\text{Na}]^+$  480.2152, Found 480.2153.

#### ***N*-hydroxy-3-((3-methyloct-7-en-1-yl)oxy)-3-trifluoromethyl-isoindolinone (1p, diastereomixture)**

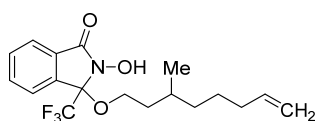

To a stirred mixture of **S4''p** (642 mg, 1.4 mmol, 1 eq) in THF (3 mL, 0.5 M) was added tetrabutylammonium fluoride trihydrate (1.3 g, 4.2 mmol, 3 eq). After three hours, saturated  $\text{NH}_4\text{Cl}$  aq. solution was added. The organic layer was washed with water and saturated  $\text{NaCl}$  aq. solution, and dried over  $\text{Na}_2\text{SO}_4$ . Evaporating the solvent afforded the crude liquid. Purification by silica gel column chromatography (hexane/EtOAc = 3/1) afforded **1p** ( $R = 3\text{-methyloct-7-en-1-yl}$ ) as colorless liquid (470 mg, 93%).

$^1\text{H}$  NMR (400 MHz,  $\text{CDCl}_3$ )  $\delta$ : 9.69 (brs, 1H), 9.68 (brs, 1H), 7.77-7.82 (m, 1H + 1H), 7.57-7.69 (m, 3H + 3H), 5.72-5.85 (m, 1H + 1H), 4.90-5.02 (m, 2H + 2H), 3.42-3.51 (m, 1H + 1H), 2.95-3.05 (m, 1H + 1H), 1.95-2.05 (m, 2H + 2H), 1.51-1.75 (m, 2H + 2H), 1.18-1.49 (m, 4H + 4H), 1.02-1.18 (m, 1H + 1H), 0.85 (d, 3H,  $J = 6.3$  Hz), 0.80 (d, 3H,  $J = 6.7$  Hz);  $^{13}\text{C}$  NMR (100 MHz,  $\text{CDCl}_3$ )  $\delta$ : 165.8, 139.02, 138.99, 135.31, 135.30, 133.2, 131.5, 130.0, 124.0, 123.9, 121.9 (q,  $J = 286.1$  Hz), 91.0 (q,  $J = 32.9$  Hz), 62.68, 62.66, 36.4, 36.2, 36.0, 35.9, 33.95, 33.91, 29.5, 29.4, 26.14, 26.13, 19.5, 19.3;  $^{19}\text{F}$  NMR (369 MHz,  $\text{CDCl}_3$ )  $\delta$ : -78.6; IR (neat,  $\text{cm}^{-1}$ )  $\nu$ : 3148, 2930, 1718, 1470, 1306, 1200; LRMS (ESI):  $m/z$  380  $[\text{M}+\text{Na}]^+$ ; HRMS (ESI):  $m/z$  calcd for  $\text{C}_{18}\text{H}_{22}\text{F}_3\text{NO}_3\text{Na}$   $[\text{M}+\text{Na}]^+$  380.1444, Found 380.1457.

#### **4. The procedure for gram-scale oxidation and the removal of the directing activator**

There is difference from the typical procedure in the equivalent of the reagents.

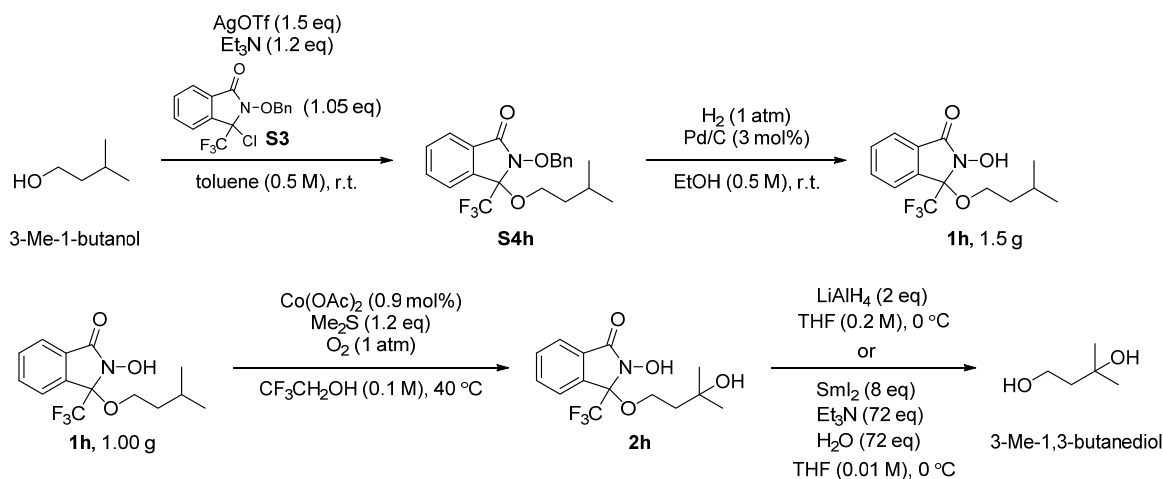

### ***N*-benzyloxy-3-isopentyloxy-3-trifluoromethyl-isoindolinone (S4h)**

To a light-protected round-bottom flask (dried by heat gun under reduced pressure) were added AgOTf (2.16 g, 8.39 mmol, 1.5 eq), dry toluene (11 mL, 0.5 M), 3-methyl-1-butanol (609  $\mu$ L, 5.59 mmol, 1 eq), triethylamine (930  $\mu$ L, 6.71 mmol, 1.2 eq), and finally dry toluene solution of **S3** (about 3 mL, 5.87 mmol, 1.05 eq) at ambient temperature. The reaction mixture was stirred overnight and saturated NaCl aq. solution was added. After filtration over Celite pad to remove the silver salts, the organic layer was washed with water and saturated NaCl aq. solution, and dried over Na<sub>2</sub>SO<sub>4</sub>. Evaporating the solvent afforded the crude oily liquid. Purification by silica gel column chromatography (hexane/EtOAc = 10/1) afforded **S4h** (R = isopentyl) as slightly yellow liquid (2.17 g, 97%).

<sup>1</sup>H NMR (500 MHz, CDCl<sub>3</sub>)  $\delta$ : 7.91 (d, 1H, *J* = 7.5 Hz), 7.69 (dd, 1H, *J* = 7.2 Hz, 8.1 Hz), 7.61-7.67 (m, 2H), 7.57 (d, 2H, *J* = 6.3 Hz), 7.35-7.43 (m, 3H), 5.33 (d, 1H, *J* = 9.7 Hz), 5.16 (d, 1H, *J* = 9.7 Hz), 3.31 (dt, 1H, *J* = 9.2 Hz, 6.3 Hz), 2.98 (dt, 1H, *J* = 9.2 Hz, 6.3 Hz), 1.62-1.72 (m, 1H), 1.35-1.50 (m, 2H), 0.81 (d, 3H, *J* = 6.6 Hz), 0.79 (d, 3H, *J* = 6.6 Hz); <sup>13</sup>C NMR (126 MHz, CDCl<sub>3</sub>)  $\delta$ : 165.6, 135.3, 134.6, 133.4, 131.6, 130.0, 129.3, 128.8, 128.4, 124.1, 122.2 (q, *J* = 286.7 Hz), 90.9 (q, *J* = 32.4 Hz), 79.1, 62.5, 37.7, 24.7, 22.4, 22.2; <sup>19</sup>F NMR (369 MHz, CDCl<sub>3</sub>)  $\delta$ : -78.1; IR (neat, cm<sup>-1</sup>)  $\nu$ : 2957, 1745, 1643, 1468, 1190; LRMS (ESI): *m/z* 416 [M+Na]<sup>+</sup>; HRMS (ESI): *m/z* calcd for C<sub>21</sub>H<sub>22</sub>F<sub>3</sub>NO<sub>3</sub>Na [M+Na]<sup>+</sup> 416.1444, Found 416.1456.

### ***N*-hydroxy-3-isopentyloxy-3-trifluoromethyl-isoindolinone (1h)**

A stirred mixture of **S4h** (2.17 g, 5.39 mmol, 1 eq) and Pd/C (10 wt%, 170 mg, 0.16 mmol, 0.03 eq) in ethanol (11 mL, 0.5 M) was exposed to H<sub>2</sub> (balloon pressure) at ambient temperature. The reaction mixture was stirred for two hours and then H<sub>2</sub> was removed. Filtration over Celite pad and evaporation of the filtrate afforded the crude oily liquid. Purification by silica gel column chromatography (hexane/EtOAc = 4/1) afforded **1h** as slightly orange liquid. The liquid was gradually solidified into white solid (1.56 g, 95%).

<sup>1</sup>H NMR (500 MHz, CDCl<sub>3</sub>)  $\delta$ : 9.93 (brs, 1H), 7.79 (d, 1H, *J* = 6.9 Hz), 7.65-7.69 (m, 1H), 7.58-7.62 (m, 2H), 3.47 (dt, 1H, *J* = 9.2 Hz, 6.9 Hz), 3.00 (dt, 1H, *J* = 9.2 Hz, 6.9 Hz), 1.69-1.78 (m, 1H), 1.45-1.59 (m, 2H), 0.88 (d, 3H, *J* = 6.9 Hz), 0.83 (d, 3H, *J* = 6.9 Hz); <sup>13</sup>C NMR (126 MHz, CDCl<sub>3</sub>)  $\delta$ : 165.9, 135.3, 133.2, 131.5, 130.0, 124.0, 123.9, 121.9 (q, *J* = 286.7 Hz), 91.0 (q, *J* = 33.6 Hz), 62.8, 37.8, 24.8, 22.6,



22.3;  $^{19}\text{F}$  NMR (369 MHz,  $\text{CDCl}_3$ )  $\delta$ : -78.5; IR (KBr,  $\text{cm}^{-1}$ )  $\nu$ : 3137, 2959, 1718, 1507, 1472, 1194; LRMS (ESI):  $m/z$  326  $[\text{M}+\text{Na}]^+$ ; HRMS (ESI):  $m/z$  calcd for  $\text{C}_{14}\text{H}_{16}\text{F}_3\text{NO}_3\text{Na}$   $[\text{M}+\text{Na}]^+$  326.0975, Found 326.0966.

#### ***N*-hydroxy-3-(3-hydroxy-3-methylbutoxy)-3-trifluoromethyl-isoindolinone (2h)**

To a round-bottom flask were added **1h** (1.00 g, 3.30 mmol, 1 eq) and TFE (33 mL, 0.1 M).  $\text{Me}_2\text{S}$  (289  $\mu\text{L}$ , 3.96 mmol, 1.2 eq) was added after replacing the air inside the tube with  $\text{O}_2$  (1 atm, balloon) and finally  $\text{Co}(\text{OAc})_2$  (0.5 M solution in DMSO, 59.4  $\mu\text{L}$ , 0.0297 mmol, 0.9 mol%) was added. The mixture was stirred at 40  $^\circ\text{C}$  and after **1h** was consumed, which was checked on TLC, TFE was removed by evaporation and then EtOAc was added. The EtOAc solution was passed through silica gel to remove the metal and DMSO, and EtOAc was removed from the filtrate by evaporation. The residue was dried under reduced pressure to afford the crude mixture. Purification by silica gel column chromatography (EtOAc/hexane = 1/1) afforded **2h** as a colorless sticky liquid (840 mg, 80%).

#### **Removal of directing activator**

$\text{LiAlH}_4$  conditions

To a round-bottom flask (dried by heat gun under reduced pressure) were added **2h** (840 mg, 2.3 mmol, 1 eq) and dry THF (13 mL, 0.2 M), and the mixture was cooled at -78  $^\circ\text{C}$ .  $\text{LiAlH}_4$  (200 mg, 2 eq) was added to the reaction mixture in three portions (65 mg; 70 mg; 65 mg), and 15 minutes later the reaction temperature was raised to 0  $^\circ\text{C}$ . Two hours later water (200  $\mu\text{L}$ ), 4 M NaOH aq. (200  $\mu\text{L}$ ), and water (600  $\mu\text{L}$ ) were added successively to the reaction mixture, with vigorous stirring. Insoluble materials were removed by filtration over Celite pad and the filtrate was dried under reduced pressure to obtain the crude mixture. Purification by silica gel column chromatography (hexane/EtOAc = 1/2) and Kugelrohr distillation afforded 3-methyl-1,3-butanediol as colorless liquid (221 mg, 81%).

$^1\text{H}$  NMR (500 MHz,  $\text{CDCl}_3$ )  $\delta$ : 3.90 (t, 2H,  $J = 5.7$  Hz), 2.22 (bs, 2H), 1.75 (t, 2H,  $J = 5.7$  Hz), 1.30 (s, 6H); LRMS (ESI):  $m/z$  127  $[\text{M}+\text{Na}]^+$ : identical to a commercial material.

$\text{SmI}_2$  conditions<sup>2</sup>

To a flask containing **2i** (18.0 mg, 0.05 mmol, 1 eq) were added  $\text{SmI}_2$  in THF (freshly prepared just before use as reported,<sup>3</sup> 4 mL, ca. 0.4 mmol, 8 eq),  $\text{Et}_3\text{N}$  (500  $\mu\text{L}$ , 3.6 mmol, 72 eq), and water (65  $\mu\text{L}$ , 36 mmol, 72 eq) at room temperature under argon atmosphere. After three hours, excess  $\text{SmI}_2$  was oxidized by bubbling air through the reaction mixture. Filtration over Celite pad and evaporation of the filtrate afforded the crude mixture (69.4 mg, 84% NMR yield).

$^1\text{H}$  NMR (500 MHz,  $\text{CDCl}_3$ )  $\delta$ : 3.82 (t, 2H,  $J = 5.7$  Hz), 3.71 (s, 12H), 3.23 (s, 1H), 1.68 (t, 2H,  $J = 5.7$  Hz), 1.52-1.62 (m, 4H), 1.35-1.50 (m, 5H), 1.23-1.32 (m, 1H); LRMS (ESI):  $m/z$  167  $[\text{M}+\text{Na}]^+$ : identical to a

<sup>2</sup> M. Szostak, M. Spain, A. J. Eberhart, D. J. Procter *J. Am. Chem. Soc.* **2014**, *136*, 2268-2271.

<sup>3</sup> M. Szostak, M. Spain, D. J. Procter *J. Org. Chem.* **2012**, *77*, 3049-3059.

reported data<sup>4</sup>.

Removal of directing activator from **2aa** and **2ae** is also successfully demonstrated.

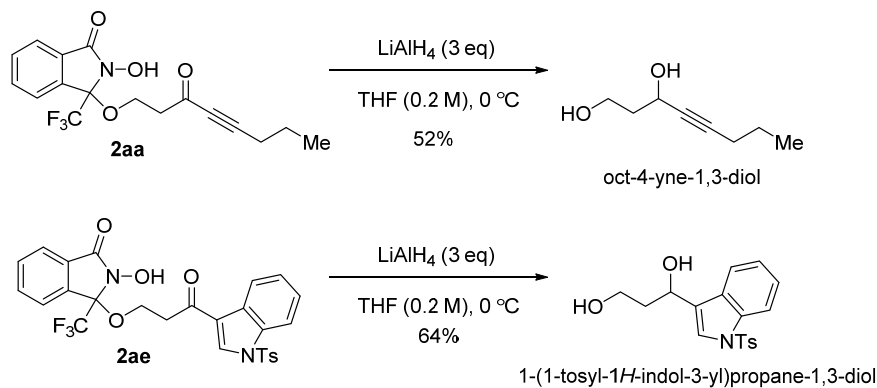

oct-4-yne-1,3-diol: <sup>1</sup>H NMR (500 MHz, CDCl<sub>3</sub>) δ: 4.64 (s, 1H), 3.94–4.02 (m, 1H), 3.81–3.89 (m, 1H), 2.51 (s, 1H), 2.19 (td, 2H, *J* = 7.2 Hz, 1.9 Hz), 2.17 (s, 1H), 1.88–2.02 (m, 2H), 1.49–1.57 (m, 2H), 0.98 (t, 3H, *J* = 7.4 Hz); <sup>13</sup>C NMR (126 MHz, acetone-*d*<sub>6</sub>) δ: 84.2, 83.3, 60.3, 59.5, 42.0, 22.9, 21.0, 13.6; IR (neat, cm<sup>-1</sup>) ν: 3347, 2961, 1717, 1430, 1050; LRMS (ESI): *m/z* 165 [M+Na]<sup>+</sup>; HRMS (ESI): *m/z* calcd for C<sub>8</sub>H<sub>14</sub>O<sub>2</sub>Na [M+Na]<sup>+</sup> 165.0886, Found 165.0886.

1-(1-(tosyl-1*H*-indol-3-yl)propane-1,3-diol: <sup>1</sup>H NMR (500 MHz, CDCl<sub>3</sub>) δ: 7.98 (d, 1H, *J* = 8.6 Hz), 7.77 (d, 2H, *J* = 8.0 Hz), 7.60 (d, 1H, *J* = 8.0 Hz), 7.55 (s, 1H), 7.30–7.34 (m, 1H), 7.20–7.25 (m, 3H), 5.20–5.25 (m, 1H), 3.85–3.95 (m, 2H), 2.99 (s, 1H), 2.34 (s, 3H), 2.27 (s, 1H), 2.06–2.20 (m, 2H); <sup>13</sup>C NMR (126 MHz, CDCl<sub>3</sub>) δ: 145.0, 135.5, 135.2, 129.9, 128.6, 126.8, 125.6, 124.9, 123.2, 122.7, 120.2, 113.8, 68.0, 61.4, 38.4, 21.6; IR (neat, cm<sup>-1</sup>) ν: 3375, 2925, 1597, 1447, 1367, 1276, 1173; LRMS (ESI): *m/z* 368 [M+Na]<sup>+</sup>; HRMS (ESI): *m/z* calcd for C<sub>18</sub>H<sub>19</sub>NO<sub>4</sub>SNa [M+Na]<sup>+</sup> 368.0927, Found 368.0908.

<sup>4</sup> T. He, W.-C. Gao, W.-K. Wang, C. Zhang *Adv. Synth. Catal.* **2014**, 356, 1113-1118.

## 5. Experimental details

### 5.1. Optimization of the oxygenation conditions

#### 5.1.1. Investigation of Directing Activator (DA)

We synthesized several DA (**A-G**) bound-alcohols and compared their reactivity under condition A [Co(OAc)<sub>2</sub> (5 mol%), Mn(OAc)<sub>3</sub>·2H<sub>2</sub>O (5 mol%) in 2,2,2-trifluoroethanol (TFE, 0.1 M) under O<sub>2</sub> (1 atm) at 40 °C] (Table S1).

Table S1

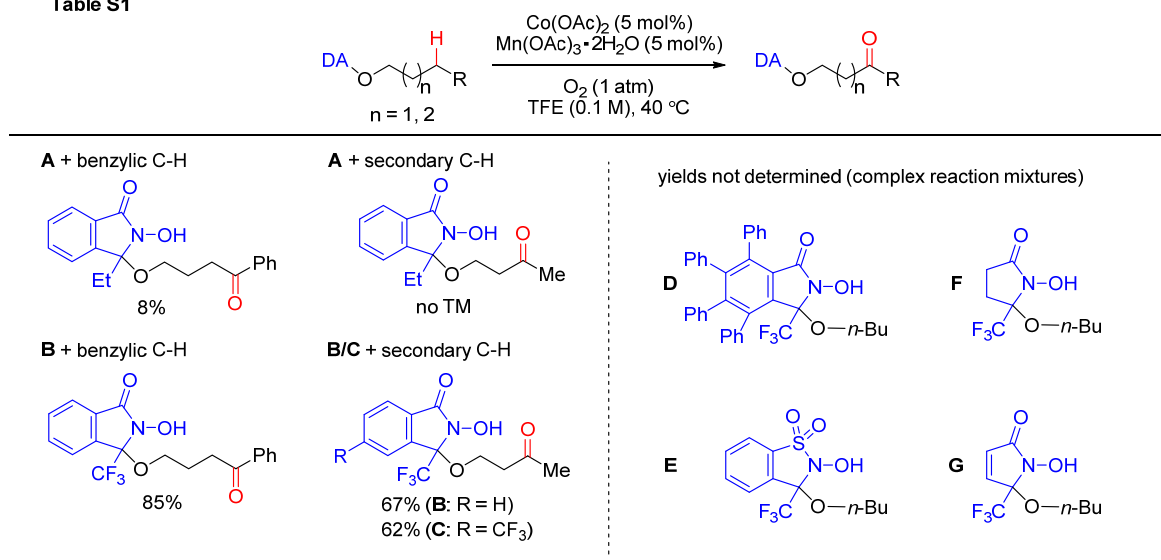

With **A**, benzylic C–H oxygenation produced the corresponding phenyl ketone product in only 8% yield. A more challenging methylene C(*sp*<sup>3</sup>)–H oxygenation did not proceed at all. In both cases, the efficiency of the C–H oxygenation was much lower than that of *N*-hydroxyphthalimide itself. Because the reactivity of *N*-oxyl radicals is in accord with their electron-deficiency, we next designed **B** bearing a CF<sub>3</sub> group at the  $\alpha$ -carbon of the nitrogen atom to enhance the reactivity of the DA. As a result, **B** promoted simple methylene C(*sp*<sup>3</sup>)–H oxygenation to produce  $\gamma$ -oxo product in 67% yield. Although the  $\alpha$ -C(*sp*<sup>3</sup>)–H bond adjacent to the ether oxygen atom is the innate reactive site, the less reactive  $\gamma$ -C(*sp*<sup>3</sup>)–H was predominantly oxygenated. Under the same conditions, benzylic C(*sp*<sup>3</sup>)–H oxygenation also proceeded well (85% yield). Introducing an additional CF<sub>3</sub> substituent at the benzene ring (**C**), however, did not further improve the yield. Additional structural modifications (**D**, **E**, **F**, or **G**) were not successful, resulting in complex mixtures and/or decomposition of the DA during the reaction. Thus, **B** proved to be the best DA.

#### 5.1.2. Secondary C(*sp*<sup>3</sup>)–H oxygenation

Solvents, metal salts, and additives were screened for higher yields of secondary C(*sp*<sup>3</sup>)–H oxygenation. Tested additives such as some acids, bases, molecular sieves, and reductants all brought no improvements.

The screening of the solvents for 1-pentanol oxygenation is shown below. As shown in Table S2, TFE (2,2,2-trifluoroethanol) and HFIP (1,1,1,3,3,3-hexafluoroisopropanol) accelerated the reaction to almost the same degree and produced almost the same yields, so the cheaper TFE was employed as the best solvent.

Table S2

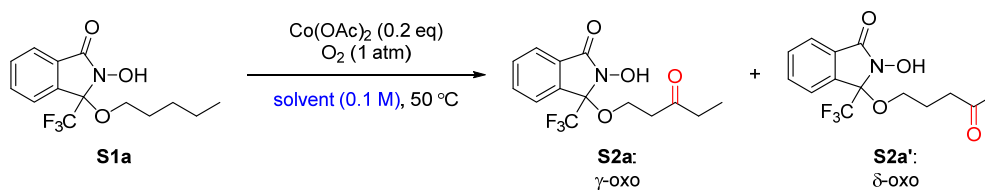

| solvent                | <b>B2ba</b> [%] | <b>B2bb</b> [%] | rxn time [hr] |
|------------------------|-----------------|-----------------|---------------|
| MeCN                   | 7               | 4               | 19            |
| MeOH                   | 0               | 0               | 19            |
| EtOH                   | 4               | 2               | 19            |
| TFE                    | 12              | 12              | 2.5           |
| HFIP                   | 12              | 16              | 2.5           |
| $\text{CF}_3\text{Ph}$ | 12              | 5               | 19            |
| EtOAc                  | 4               | 1               | 19            |
| MeO <sup>t</sup> Bu    | 3               | 3               | 19            |

(NMR yield)

Then, metal salts were screened using **B**-anchored 1-butanol instead of **B**-anchored 1-pentanol because **B**-anchored 1-butanol gave only one regioisomer and made the analysis easier.

Table S3

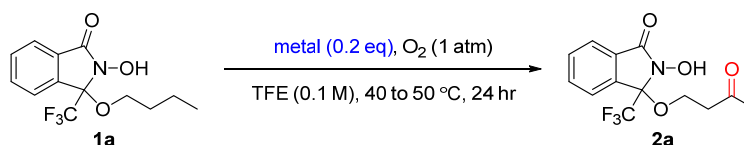

| metal                                                | NMR yield | metal                                                                                                          | NMR yield |
|------------------------------------------------------|-----------|----------------------------------------------------------------------------------------------------------------|-----------|
| $\text{Co}(\text{OAc})_2$                            | 40        | $\text{Cu}(\text{OTf})_2$                                                                                      | 0         |
| $\text{Co}(\text{acac})_2$                           | 0         | $\text{FeCl}_2$                                                                                                | 0         |
| $\text{Co}(\text{NO}_3)_2 \cdot 6\text{H}_2\text{O}$ | 7         | $\text{FeCl}_3$                                                                                                | 0         |
| $\text{Mn}(\text{OAc})_2$                            | 3         | $\text{Fe}(\text{OTf})_2$                                                                                      | 0         |
| $\text{Mn}(\text{OAc})_3 \cdot 2\text{H}_2\text{O}$  | 36        | $\text{Fe}(\text{OTf})_3$                                                                                      | 0         |
| $\text{MnBr}_2$                                      | 0         | $\text{Fe}(\text{OAc})_2$                                                                                      | 0         |
| $\text{Mn}(\text{acac})_2$                           | 0         | $\text{Fe}(\text{OH})(\text{OAc})_2$                                                                           | 0         |
| $\text{Mn}(\text{OTf})_2$                            | 5         | no metal                                                                                                       | 0         |
| $\text{CuOAc}$                                       | 0         | $\text{Co}(\text{OAc})_2 + \text{Mn}(\text{OAc})_2$ (1:1)                                                      | 16        |
| $\text{Cu}(\text{OAc})_2$                            | 0         | $\text{Co}(\text{OAc})_2 + \text{Mn}(\text{OAc})_3 \cdot 2\text{H}_2\text{O}$ (1:1)                            | 67        |
| $\text{CuBr}$                                        | 0         | $\text{Co}(\text{acac})_2 + \text{Mn}(\text{OAc})_3 \cdot 2\text{H}_2\text{O}$ (1:1)                           | 50        |
| $\text{CuOTf} \cdot 0.5\text{PhH}$                   | 0         | $\text{Co}(\text{NO}_3)_2 \cdot 6\text{H}_2\text{O} + \text{Mn}(\text{OAc})_3 \cdot 2\text{H}_2\text{O}$ (1:1) | 41        |

As shown in Table S3, the combination of  $\text{Co}(\text{OAc})_2$  and  $\text{Mn}(\text{OAc})_3 \cdot 2\text{H}_2\text{O}$  produced the best result. The role of  $\text{Mn}(\text{OAc})_3 \cdot 2\text{H}_2\text{O}$  is not clear, but we suppose that the main role of  $\text{Mn}(\text{OAc})_3 \cdot 2\text{H}_2\text{O}$  is to trap reversibly reactive intermediates such as peroxy radicals and alkoxy radicals to suppress unfavorable side reactions, considering the fact that the reaction rate became lower by adding  $\text{Mn}(\text{OAc})_3 \cdot 2\text{H}_2\text{O}$  than when  $\text{Co}(\text{OAc})_2$  alone was used as a metal source even though  $\text{Mn}(\text{OAc})_3 \cdot 2\text{H}_2\text{O}$  itself was able to catalyze the reaction.

The 1-butanol oxygenation was conducted at 30, 40, or 50 °C. The reaction didn't complete at 30 °C, and became slightly complicated at 50 °C compared to that at 40 °C. Therefore, 40 °C was revealed to be the best reaction temperature.

Then, the optimal conditions for secondary  $\text{C}(\text{sp}^3)\text{-H}$  oxygenation were these:

$\text{Co}(\text{OAc})_2$  (5 mol%),  $\text{Mn}(\text{OAc})_3 \cdot 2\text{H}_2\text{O}$  (5 mol%),  $\text{O}_2$  (1 atm), TFE (0.1 M), 40 °C.

### 5.1.3. Tertiary C(sp<sup>3</sup>)-H oxygenation

Although 67% NMR yield was obtained for 1-butanol oxygenation under condition A, the reaction became complicated and only 20% NMR yield was obtained for 3-methyl-1-butanol oxygenation (**1h**) under the same conditions. It was probably because condition A was too harsh for tertiary C(sp<sup>3</sup>)-H oxygenation, so the reaction conditions had to be refined for higher yields. The goal was accomplished by reducing the amount of the metal salts. Lower reaction temperatures and different solvents were not effective. The best reaction conditions were these:

Co(OAc)<sub>2</sub> (1 mol%), Me<sub>2</sub>S (1.2 eq), O<sub>2</sub> (1 atm), TFE (0.1 M), 40 °C.

### 5.2. Absolute configuration of DA-anchored (+)-menthol (**1k**)

X-ray analysis of less polar diastereomer of *O*-(4-nitrobenzyl)-**1k** was conducted to determine the absolute configuration of DA-anchored (+)-menthol. The configuration of the hemiaminal center was revealed to be (*R*), which accords with that of reactive isomer in aerobic C-H oxygenation.

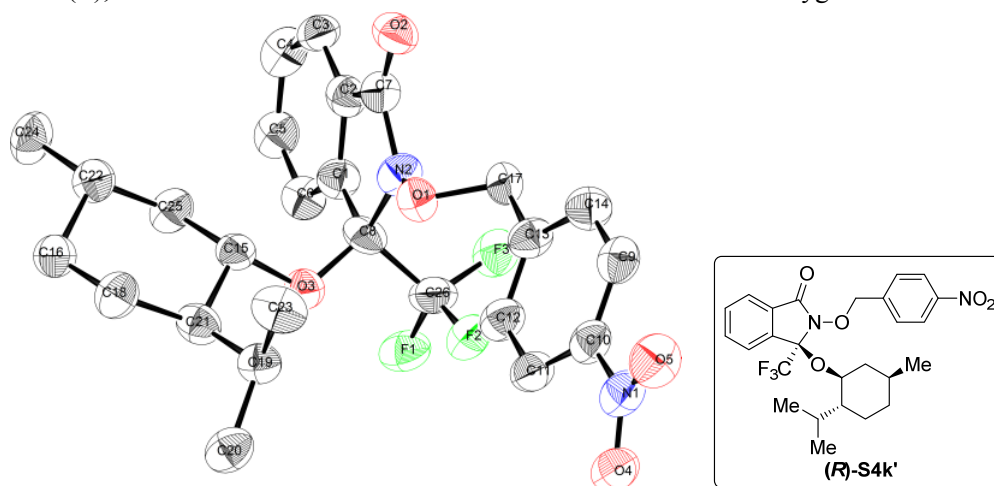

Crystallization procedure: less polar diastereomer of *O*-(4-nitrobenzyl)-**1k** was dissolved in MeCN and the solvent was gradually evaporated under air at room temperature. After a few days a needle crystal was obtained.

The supposed reason for the difference in the reactivity is depicted in the figure below.

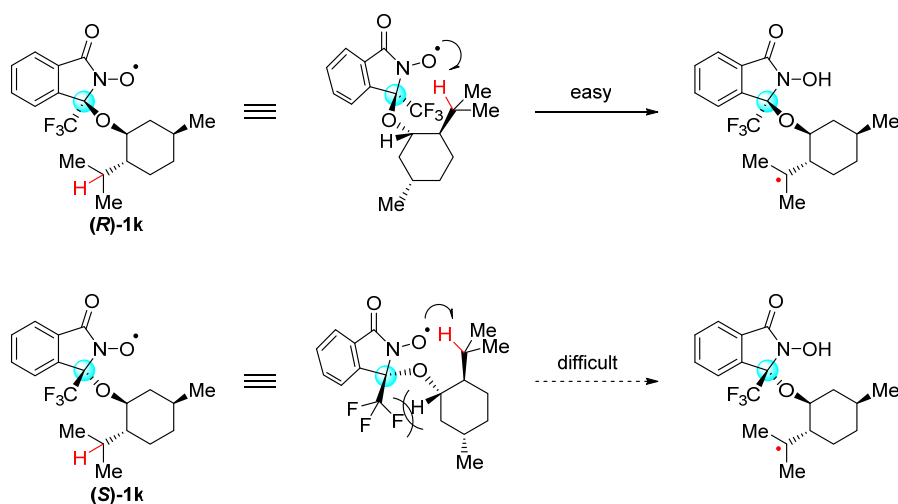

According to molecular modeling, there is no steric repulsion during the abstraction of the red hydrogen in **(R)-1k** and it proceeds smoothly; whereas in the case of **(S)-1k** there is a steric repulsion between  $\text{CF}_3$  and the axial  $\alpha$ -hydrogen of the oxygen atom in menthol that makes it difficult for the *N*-oxyl radical to access the red hydrogen.

### 5.3. Comparison of reaction speed in benzylic C–H oxygenation

The chemical yield after 30 min was compared for  $\beta$ -,  $\gamma$ -, and  $\delta$ -C–H oxygenation. Reaction speed of  $\beta$ -C–H oxygenation is significantly slower than  $\gamma$ - and  $\delta$ -C–H oxygenation. The difference between  $\gamma$ - and  $\delta$ -C–H oxygenation is, however, not large. This low  $\gamma/\delta$  selectivity is a current limitation of our method.

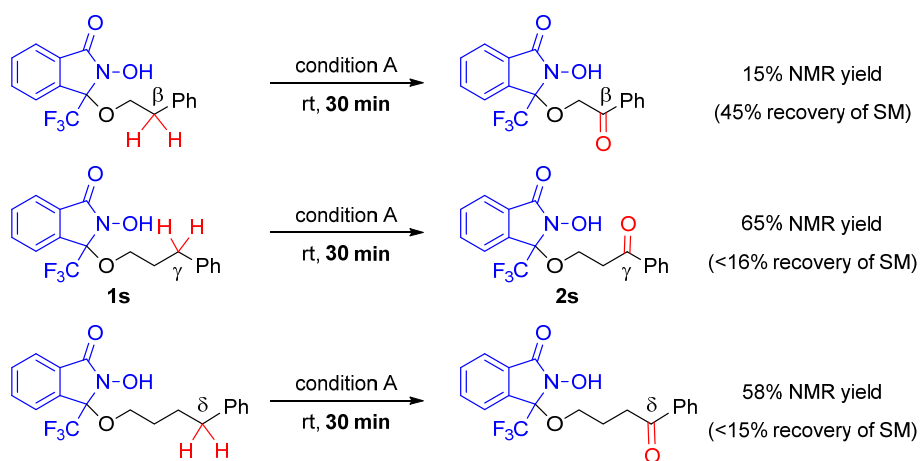

condition A:  $\text{Co}(\text{OAc})_2$  (5 mol%),  $\text{Mn}(\text{OAc})_3 \cdot 2\text{H}_2\text{O}$  (5 mol%),  $\text{O}_2$  (1 atm), TFE (0.1 M)

## 6. Selective ultra-remote C-H oxygenation

### 6.1. Synthesis of substrate 3

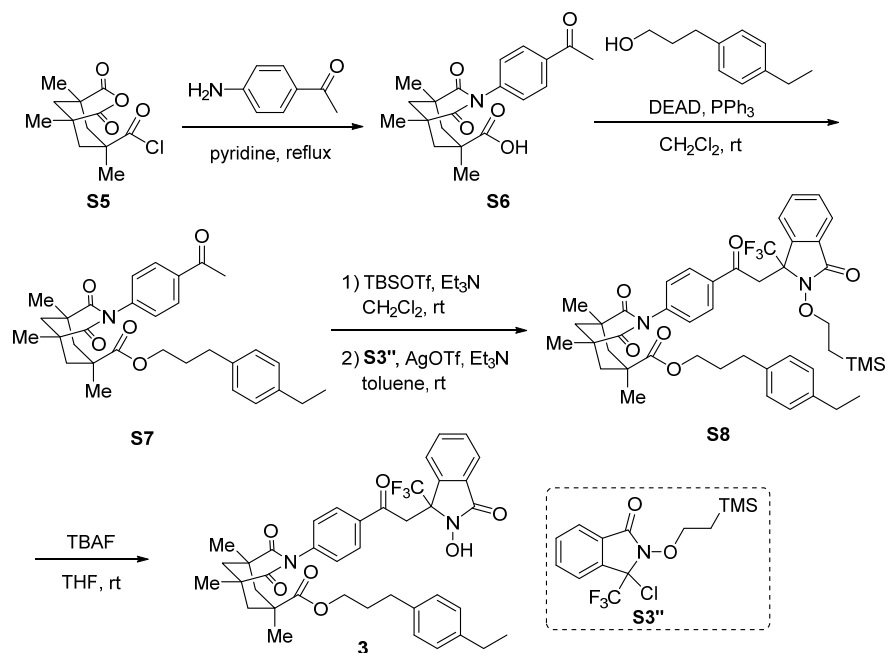

#### Synthetic procedure from S5 to S6

To a round bottom flask were added **S5**<sup>5</sup> (2.15 g, 8.3 mmol), *p*-acetylaniline (1.07 g, 7.9 mmol) and pyridine (42 mL, 0.2 M). The mixture was stirred at reflux for 18 h. Pyridine was removed by evaporation. The obtained crude mixture was purified by silica gel column chromatography (EtOAc/hexane = 2/1) to afford **S6** with inseparable byproducts as a colorless sticky liquid (2.98 g). This mixture was used for next step.

#### Synthetic procedure from S6 to S7

To a round bottom flask were added acid impure **S6** (566 mg, ca. 1.6 mmol), 3-(4-ethylphenyl)propan-1-ol (286 mg, 1.74 mmol), diethyl azodicarboxylate (2.5 M solution in toluene, 0.759 mL, 1.90 mmol), PPh<sub>3</sub> (456 mg, 1.90 mmol) and CH<sub>2</sub>Cl<sub>2</sub> (8.7 mL, 0.2 M). The mixture was stirred at room temperature for 2.5 h, followed by all the volatiles were removed by evaporation. The obtained crude mixture was purified by silica gel column chromatography (EtOAc/hexane = 1/2) to afford **S7** as a colorless sticky liquid (532 mg, 69%, 2 steps).

<sup>1</sup>H NMR (392 MHz, CD<sub>3</sub>OD)  $\delta$ : 7.99 (d, 2H,  $J = 8.1$  Hz), 7.27 (d, 2H,  $J = 8.1$  Hz), 7.01 (d, 2H,  $J = 7.6$  Hz), 6.96 (d, 2H,  $J = 7.6$  Hz), 3.99 (t, 2H,  $J = 6.1$  Hz), 2.71 (d, 2H,  $J = 13.9$  Hz), 2.60 (s, 3H), 2.51-2.60 (m, 2H+2H), 2.24 (d, 1H,  $J = 13.5$  Hz), 1.70-1.80 (m, 2H), 1.58 (d, 1H,  $J = 13.5$  Hz), 1.42 (d, 2H,  $J = 13.9$  Hz), 1.30 (s, 3H), 1.27 (s, 3H), 1.18 (t, 3H,  $J = 7.6$  Hz); <sup>13</sup>C NMR (126 MHz, CDCl<sub>3</sub>)  $\delta$ : 197.6, 176.1, 176.1,

<sup>5</sup> (a) Q. Ye, I. V. Komarov, A. J. Kirby, M. Jones, Jr. *J. Org. Chem.* **2002**, *67*, 9288-9294. (b) T. J. Dale, J. Rebek, Jr. *J. Am. Chem. Soc.* **2006**, *128*, 4500-4501.

142.0, 140.2, 138.4, 136.3, 128.9, 128.8, 128.4, 128.0, 64.9, 44.3, 44.0, 31.7, 31.1, 30.1, 28.5, 26.8, 26.1, 15.8; IR (neat,  $\text{cm}^{-1}$ )  $\nu$ : 2964, 1721, 1689, 1602, 1460, 1357, 1321, 1265, 1174; LRMS (ESI):  $m/z$  526  $[\text{M}+\text{Na}]^+$ ; HRMS (ESI):  $m/z$  calcd for  $\text{C}_{31}\text{H}_{37}\text{NO}_5\text{Na}$   $[\text{M}+\text{Na}]^+$  526.2564, Found 526.2541.

### Synthetic procedure from S7 to S8

To solution of ketone **S7** (288 mg, 0.588 mmol) in  $\text{CH}_2\text{Cl}_2$  (2.94 mL, 0.2 M) were added triethylamine (0.590 mL, 4.23 mmol) and TBSOTf (0.494 mL, 2.82 mmol). The mixture was stirred at room temperature for 40 min. After ketone was consumed, which was checked on TLC, pentane and  $\text{H}_2\text{O}$  were added. The organic layer was separated and washed with 10% aqueous  $\text{CuSO}_4$  solution and 5%  $\text{NaHCO}_3$  aq. solution, and then dried over  $\text{Na}_2\text{SO}_4$ . Filtration followed by evaporating the solvent at room temperature afforded the crude mixture containing the corresponding enol silyl ether.

To a round bottom flask were added the all amount of the crude mixture, **S3''** (0.394 mL, 1.18 mmol),  $\text{Et}_3\text{N}$  (0.246 mL, 1.76 mmol) and toluene (5.88 mL, 0.1 M), followed by  $\text{AgOTf}$  (376 mg, 1.47 mmol). The mixture was stirred at room temperature for 18 h, and saturated  $\text{NaCl}$  aq. solution was added. After filtration over Celite pad to remove the silver salts, the organic layer was separated and washed with water and saturated  $\text{NaCl}$  aq. solution, and dried over  $\text{Na}_2\text{SO}_4$ . After filtration, all the volatiles were removed by evaporation. The obtained crude mixture was purified by silica gel column chromatography ( $\text{EtOAc}/\text{hexane} = 2/5$ ) to afford **S8** as colorless sticky liquid (421 mg, 87% yield).

$^1\text{H}$  NMR (500 MHz,  $\text{CD}_3\text{OD}$ )  $\delta$ : 7.85-7.90 (m, 1H), 7.84 (d, 2H,  $J = 8.6$  Hz), 7.60-7.66 (m, 3H), 7.22 (d, 2H,  $J = 8.6$  Hz), 7.00 (d, 2H,  $J = 8.0$  Hz), 6.96 (d, 2H,  $J = 8.0$  Hz), 4.60 (brs, 1H), 4.37-4.43 (m, 1H), 4.09-4.20 (m, 3H), 3.91-3.97 (m, 2H), 2.69 (d, 2H,  $J = 13.7$  Hz), 2.54 (q, 2H,  $J = 7.4$  Hz), 2.49 (t, 2H,  $J = 7.4$  Hz), 2.21 (d, 1H,  $J = 13.2$  Hz), 1.67-1.73 (m, 2H), 1.56 (d, 1H,  $J = 13.2$  Hz), 1.39 (d, 2H,  $J = 13.7$  Hz), 1.28 (s, 6H), 1.25 (s, 3H), 1.16 (t, 3H,  $J = 7.4$  Hz), 0.90-1.10 (m, 2H), -0.01 (s, 9H);  $^{13}\text{C}$  NMR (126 MHz,  $\text{CD}_3\text{OD}$ )  $\delta$ : 194.4, 178.3, 178.3, 178.0, 170.9, 143.1, 142.4, 140.00, 139.8, 137.2, 134.7, 131.9, 131.5, 130.4, 129.6, 129.3, 129.0, 126.1 (q,  $J = 283.1$  Hz), 124.9, 124.3, 76.4, 69.0 (q,  $J = 30.1$  Hz), 66.1, 44.9, 43.9, 43.6, 42.05, 42.03, 32.8, 31.40, 31.36, 29.6, 26.3 17.9, 16.5, -1.25;  $^{19}\text{F}$  NMR (369 MHz,  $\text{CDCl}_3$ )  $\delta$ : -76.1; IR (neat,  $\text{cm}^{-1}$ )  $\nu$ : 2963, 1733, 1693, 1602, 1463, 1356, 1321, 1273, 1178, 1092; LRMS (ESI):  $m/z$  841  $[\text{M}+\text{Na}]^+$ ; HRMS (ESI):  $m/z$  calcd for  $\text{C}_{43}\text{H}_{53}\text{F}_3\text{N}_2\text{O}_7\text{SiNa}$   $[\text{M}+\text{Na}]^+$  841.3466, Found 841.3436.

### Synthetic procedure from S8 to 3

To a solution of **S8** (421 mg, 0.514 mmol) in THF (0.590 mL, 4.23 mmol) was added tetrabutylammonium fluoride (1.0 M solution in THF, 1.54 mL, 1.54 mmol). The mixture was stirred at room temperature. After **S8** was consumed, which was checked on TLC, water was added. The organic layer was separated and the water layer was extracted by EtOAc two times. The combined organic layer was dried over  $\text{Na}_2\text{SO}_4$ . After filtration, all the volatiles were removed by evaporation. The obtained crude mixture was purified by silica gel column chromatography ( $\text{EtOAc}/\text{hexane} = 2/3$ ) to afford **3** as colorless sticky liquid (287 mg, 78% yield)

$^1\text{H}$  NMR (500 MHz,  $\text{CD}_3\text{OD}$ )  $\delta$ : 7.85-7.90 (m, 3H), 7.57-7.65 (m, 3H), 7.22 (d, 2H,  $J = 8.0$  Hz), 7.01 (d,



2H,  $J = 8.0$  Hz), 6.96 (d, 2H,  $J = 8.0$  Hz), 4.17-4.22 (m, 2H), 3.96 (t, 2H,  $J = 6.3$  Hz), 2.69 (d, 2H,  $J = 13.7$  Hz), 2.55 (q, 2H,  $J = 7.7$  Hz), 2.21 (d, 1H,  $J = 13.2$  Hz), 1.68-1.75 (m, 2H), 1.56 (d, 1H,  $J = 13.2$  Hz), 1.40 (d, 2H,  $J = 13.7$  Hz), 1.28 (s, 6H), 1.16 (t, 3H,  $J = 7.7$  Hz);  $^{13}\text{C}$  NMR (126 MHz,  $\text{CDCl}_3$ )  $\delta$ : 193.4, 176.30, 176.27, 168.1, 147.25, 142.21, 141.1, 138.6, 137.7, 135.8, 133.1, 130.7, 129.3, 129.1, 128.9, 128.6, 128.2, 128.0, 125.7, 124.5 (q,  $J = 289.5$  Hz), 123.4, 121.1, 68.2 (q,  $J = 27.2$  Hz), 65.1, 44.6, 44.5, 44.1, 42.5, 41.2, 34.5, 32.0, 31.2, 30.3, 30.1, 28.7, 26.3, 16.0;  $^{19}\text{F}$  NMR (369 MHz,  $\text{CDCl}_3$ )  $\delta$ : -75.8; IR (neat,  $\text{cm}^{-1}$ )  $\nu$ : 3420, 2930, 1725, 1692, 1600, 1321, 1273, 1176, 1091; LRMS (ESI):  $m/z$  741  $[\text{M}+\text{Na}]^+$ ; HRMS (ESI):  $m/z$  calcd for  $\text{C}_{40}\text{H}_{41}\text{F}_3\text{N}_2\text{O}_7\text{Na}$   $[\text{M}+\text{Na}]^+$  741.2758, Found 741.2794.

## 6.2. Oxygenation of **3** (ultra-remote position-selective aerobic C-H oxygenation)

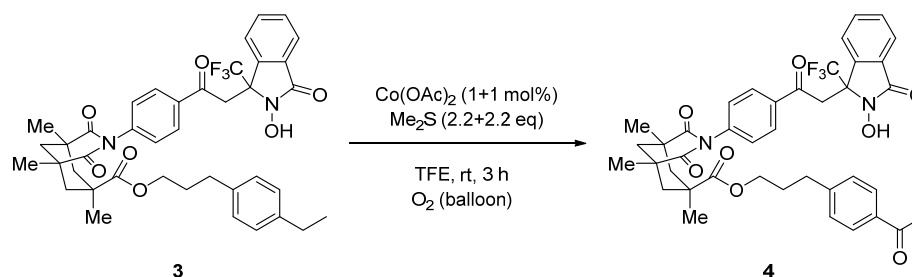

To a test tube were added **3** (30.0 mg, 41.7  $\mu\text{mol}$ ) and TFE (0.42 mL, 0.1 M).  $\text{Me}_2\text{S}$  (6.71  $\mu\text{L}$ , 91.8  $\mu\text{mol}$ ) was added after replacing the air inside the tube with  $\text{O}_2$  (1 atm, balloon), and finally  $\text{Co}(\text{OAc})_2$  (0.2 M solution in DMSO, 2.1  $\mu\text{L}$ , 0.42  $\mu\text{mol}$ ) was added. The mixture was stirred at room temperature. After 1.5 h,  $\text{Co}(\text{OAc})_2$  (0.2 M solution in DMSO, 2.1  $\mu\text{L}$ , 0.42  $\mu\text{mol}$ ) and  $\text{Me}_2\text{S}$  (6.71  $\mu\text{L}$ , 91.8  $\mu\text{mol}$ ) were added. After **3** was consumed, which was checked on TLC, TFE was removed by evaporation and water was added. The aqueous layer was extracted by EtOAc three times. The combined organic layer was dried over  $\text{Na}_2\text{SO}_4$ . After filtration, all the volatiles were removed by evaporation. The yield was determined as 66% by  $^1\text{H}$  NMR of the crude mixture with 1,1,2,2-tetrachloroethane as the internal standard. Purification by neutral silica gel column chromatography (EtOAc/hexane = 2/3) afforded **4** as a white solid (16.3 mg, 53%).

$^1\text{H}$  NMR (500 MHz,  $\text{CD}_3\text{OD}$ )  $\delta$ : 7.80-7.88 (m, 3H), 7.78 (d, 2H,  $J = 8.0$  Hz), 7.55-7.65 (m, 3H), 7.23 (d, 2H,  $J = 8.0$  Hz), 7.18 (d, 2H,  $J = 8.0$  Hz), 4.10-4.16 (m, 2H), 3.92-4.00 (m, 2H), 2.68 (d, 1H,  $J = 14.3$  Hz), 2.61 (t, 2H,  $J = 7.4$  Hz), 2.51 (s, 3H), 2.15-2.23 (m, 1H), 1.70-1.79 (m, 2H), 1.57 (d, 1H,  $J = 13.2$  Hz), 1.40 (d, 1H,  $J = 14.3$  Hz), 1.28 (s, 6H), 1.25 (s, 3H);  $^{13}\text{C}$  NMR (126 MHz,  $\text{CD}_3\text{OD}$ )  $\delta$ : 200.3, 178.0, 177.6, 169.2, 148.7, 142.0, 137.1, 136.0, 133.7, 132.2, 131.0, 130.0, 129.7, 129.5, 129.0, 125.7 (d,  $J = 278.3$  Hz), 124.3, 123.9, 65.6, 44.5, 43.5, 43.2, 41.7, 34.9, 32.8, 31.0, 30.6, 30.5, 29.3, 26.5, 25.9;  $^{19}\text{F}$  NMR (369 MHz,  $\text{CDCl}_3$ )  $\delta$ : -75.5; IR (neat,  $\text{cm}^{-1}$ )  $\nu$ : 3432, 2929, 1690, 1605, 1463, 1358, 1321, 1273, 1178, 1093; LRMS (ESI):  $m/z$  755  $[\text{M}+\text{Na}]^+$ ; HRMS (ESI):  $m/z$  calcd for  $\text{C}_{40}\text{H}_{39}\text{F}_3\text{N}_2\text{O}_8\text{Na}$   $[\text{M}+\text{Na}]^+$  755.2551, Found 755.2537.

## 6.3. Removal of directing activator

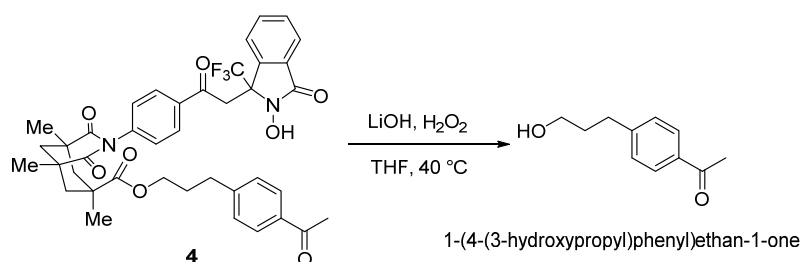

To a test tube were added **4** (2.8 mg, 3.8  $\mu\text{mol}$ ) and THF/ $\text{H}_2\text{O}$  (3/1, 80  $\mu\text{L}$ , 0.05 M). To the mixture were added LiOH (1 M solution in  $\text{H}_2\text{O}$ , 20  $\mu\text{L}$ , 20  $\mu\text{mol}$ ) and  $\text{H}_2\text{O}_2$  (10 M in  $\text{H}_2\text{O}$ , 3.2  $\mu\text{L}$ , 32  $\mu\text{mol}$ ). After stirring for 21 h, LiOH (1 M solution in  $\text{H}_2\text{O}$ , 20  $\mu\text{L}$ , 20  $\mu\text{mol}$ ) and  $\text{H}_2\text{O}_2$  (10 M in  $\text{H}_2\text{O}$ , 3.2  $\mu\text{L}$ , 32  $\mu\text{mol}$ ) were further added. The mixture was stirred at 40  $^\circ\text{C}$  for 24 h. After **4** was consumed, which was checked on TLC, water was added. The aqueous layer was extracted by EtOAc three times. The combined organic layer was dried over  $\text{Na}_2\text{SO}_4$ . After filtration, all the volatiles were removed by evaporation to afford the crude mixture. The yield was determined to be 79% by  $^1\text{H}$  NMR of the obtained crude mixture with 1,1,2,2-tetrachloroethane as the internal standard.

$^1\text{H}$  NMR (500 MHz,  $\text{CDCl}_3$ )  $\delta$ : 7.89 (d, 2H,  $J = 8.0$  Hz), 7.30 (d, 2H,  $J = 8.0$  Hz), 3.68 (t, 2H,  $J = 6.3$  Hz), 2.78 (t, 2H,  $J = 2.78$  Hz), 2.59 (s, 3H), 1.85-1.95 (m, 2H), LRMS (ESI):  $m/z$  201  $[\text{M}+\text{Na}]^+$ ; identical to a reported data.<sup>6</sup>

#### 6.4. Structural analysis of oxygenated products

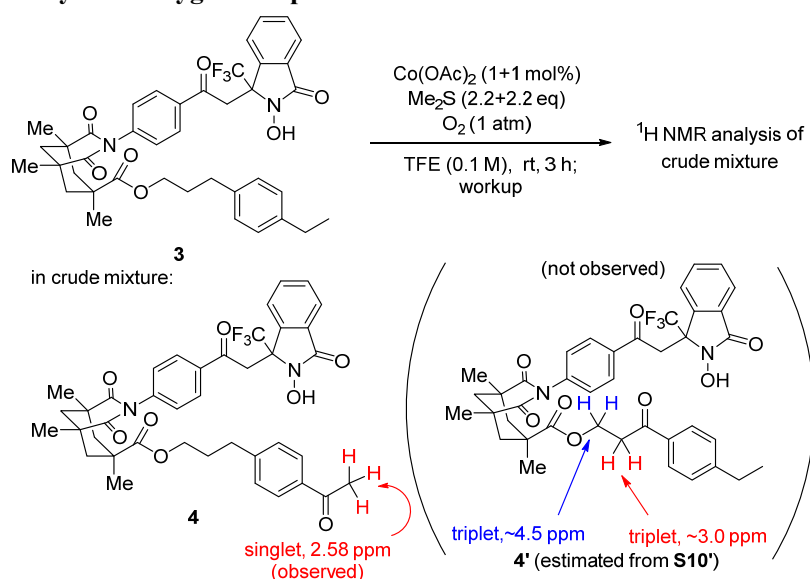

After aerobic oxygenation of **3**,  $^1\text{H}$  NMR chart of the crude mixture was carefully analyzed. No triplet peak was observed around 3.00-3.50 ppm, which corresponds to the  $\alpha$ -methylene protons of phenyl ketone **4'** (marked in red in **4'** of the above scheme), while a singlet peak at 2.58 ppm was observed, which corresponds to the  $\alpha$ -methyl protons of phenyl ketone of **4** (marked in red in **4**). For comparison, oxidized

<sup>6</sup> Z.-L. Shen, K. K. Goh, Y.-S. Yang, Y.-C. Lai, C. H. A. Wong, H.-L. Cheong, T.-P. Loh, *Angew. Chem. Int. Ed.* **2011**, *50*, 511.

products of model substrate **S11** afforded  $\alpha$ -methylene protons of phenyl ketone **S12'** observed at 3.35 ppm as triplet (marked in red in **S12'** of the scheme below), and  $\alpha$ -methyl protons of ketone **S12** observed at 2.58 ppm as singlet (marked in red in **S12**). This fact indicates that regioisomer **4'** did not generate at all. Thus, we concluded that the oxygenation of **3** occurred exclusively at the remote benzylic position. The intermolecular oxygenation of model compound **S11** produced a 2 : 1 regiomixture of **S12** and **S12'** at 60 °C. This result, combined with the contrasting and exclusive remote-regioselectivity in oxygenation of **3**, further supported the notion that oxygenation of **3** proceeded in an intramolecular manner controlled by the “long-arm linker” directing activator.

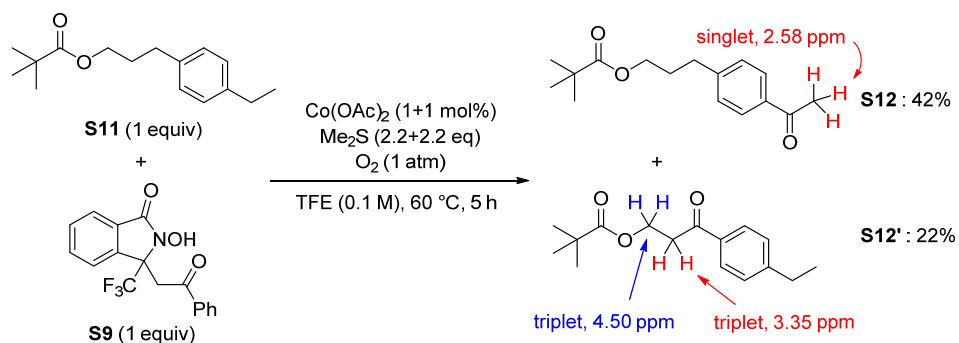

## 7. Analytical data

Full spectroscopic data were described for **S4**, **1**, and **2** related to Table 1.

### *N*-benzyloxy-3-((2-methylpentan-2-yl)oxy)-3-trifluoromethyl-isoindolinone (**S4b**)

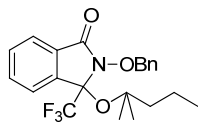

colorless liquid;  $^1\text{H}$  NMR (500 MHz,  $\text{CDCl}_3$ )  $\delta$ : 7.88 (dd, 1H,  $J = 6.0$  Hz, 2.0 Hz), 7.61-7.73 (m, 3H), 7.56 (d, 2H,  $J = 6.9$  Hz), 5.45 (d, 1H,  $J = 9.2$  Hz), 5.06 (d, 1H,  $J = 9.2$  Hz), 1.32-1.50 (m, 4H), 1.03 (s, 3H), 0.93 (s, 3H), 0.79-0.84 (m, 3H);  $^{13}\text{C}$  NMR (126 MHz,  $\text{CDCl}_3$ )  $\delta$ : 165.1, 137.3, 134.8, 132.6, 131.4, 130.3, 129.2, 128.6, 128.4, 125.4, 123.9, 122.7 (q,  $J = 286.0$  Hz), 89.1 (q,  $J = 32.3$  Hz), 82.3, 78.5, 46.1, 27.3, 26.0, 16.9, 14.3;  $^{19}\text{F}$  NMR (369 MHz,  $\text{CDCl}_3$ )  $\delta$ : -79.7; IR (neat,  $\text{cm}^{-1}$ )  $\nu$ : 2961, 1739, 1646, 1190; LRMS (ESI):  $m/z$  430  $[\text{M}+\text{Na}]^+$ ; HRMS (ESI):  $m/z$  calcd for  $\text{C}_{22}\text{H}_{24}\text{F}_3\text{NO}_3\text{Na}$   $[\text{M}+\text{Na}]^+$  430.1601, Found 430.1620.

### *N*-hydroxy-3-((2-methylpentan-2-yl)oxy)-3-trifluoromethyl-isoindolinone (**1b**)

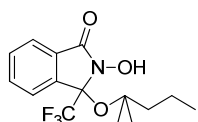

reddish solid;  $^1\text{H}$  NMR (500 MHz,  $\text{CDCl}_3$ )  $\delta$ : 9.95 (brs, 1H), 7.78 (d, 1H,  $J = 7.3$  Hz), 7.66 (d, 1H,  $J = 7.3$  Hz), 7.61 (dd, 1H,  $J = 7.3$  Hz, 7.3 Hz), 7.57 (dd, 1H,  $J = 7.3$  Hz, 7.3 Hz), 1.40-1.55 (m, 4H), 1.15 (s, 3H), 0.96 (s, 3H), 0.90 (t, 3H,  $J = 6.6$  Hz);  $^{13}\text{C}$  NMR (126 MHz,  $\text{CDCl}_3$ )  $\delta$ : 165.4, 137.6, 132.5, 131.2, 129.8, 125.2, 123.7, 122.1 (q,  $J = 288.2$  Hz), 89.9 (q,  $J = 32.3$  Hz), 82.6, 46.2, 27.2, 26.2, 17.1, 14.4;  $^{19}\text{F}$  NMR (369 MHz,  $\text{CDCl}_3$ )  $\delta$ : -79.5, -79.7 (rotamers); IR (KBr,  $\text{cm}^{-1}$ )  $\nu$ : 3159, 2962, 1718, 1473, 1391, 1373, 1192; LRMS (ESI):  $m/z$  340  $[\text{M}+\text{Na}]^+$ ; HRMS (ESI):  $m/z$  calcd for  $\text{C}_{15}\text{H}_{18}\text{F}_3\text{NO}_3\text{Na}$   $[\text{M}+\text{Na}]^+$  340.1131, Found 340.1117.

the mixture of

### *N*-hydroxy-3-((2-methyl-4-oxopentan-2-yl)oxy)-3-trifluoromethyl-isoindolinone (**2b**)

and

### 4-hydroxy-2,2,4-trimethyl-11b-(trifluoromethyl)-3,4-dihydro-2*H*-[1,4,2]dioxazepino[3,2-*a*]isoindol-7(11*bH*)-one (**2b'**; diastereomixture)

Starting material **1b** (31.7 mg, 0.1 mmol) was oxygenated under condition A of section 2, and **2b'** (20.7 mg, 0.062 mmol) was isolated as described in the General method (62% yield).

**2b** easily cyclizes to form **2b'** and the equilibrium position lies far to the right.

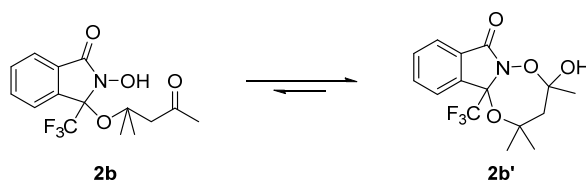

No peaks of **2b** were detected in NMR spectra when the solvent was CDCl<sub>3</sub>; the peaks of **2b** could be slightly detected when the solvent was acetone-*d*<sub>6</sub> as shown below (CDCl<sub>3</sub> should be avoided to take a <sup>13</sup>C NMR spectrum because **2b'** doesn't dissolve in CDCl<sub>3</sub> very much).

white solid; <sup>1</sup>H NMR (500 MHz, acetone-*d*<sub>6</sub>; underlined chemical shifts for **2b**) δ: 9.47 (s, 1H), 7.68-7.86 (m, 4H + 4H), 5.68-5.71 (m, 1H), 2.81 (d, 1H, *J* = 14.9 Hz), 2.72 (d, 1H, *J* = 14.9 Hz), 2.23 (d, 1H, *J* = 14.9 Hz), 2.21 (s, 3H), 2.10 (d, 1H, *J* = 14.9 Hz), 1.60 (s, 3H), 1.31 (s, 3H), 1.18 (s, 3H), 1.12 (s, 3H), 1.11 (s, 3H); <sup>13</sup>C NMR (126 MHz, acetone-*d*<sub>6</sub>; underlined chemical shifts for **2b**; wavylined shifts for **2b** or **2b'**; dashed-lined shifts for both **2b** and **2b'**; two shifts in brackets derived from "the same" carbon of the diastereomers) δ: 207.4, 164.0, 163.5, 139.8, 137.8, 134.1, 133.6, 132.6, 132.0, 131.5, 130.4, 126.6, 124.7, 124.2, 124.1, 123.6 (q, *J* = 288.5 Hz), [107.8, 107.7], 90.3 (q, *J* = 31.7 Hz), 56.1, 52.8, 33.9, 32.1, 28.2, [27.6, 27.5], 26.1, 25.6; <sup>19</sup>F NMR (369 MHz, CDCl<sub>3</sub>; underlined chemical shifts for **2b**) δ: -79.1, -79.7; IR (KBr, cm<sup>-1</sup>) ν: 3460, 2985, 1730, 1469, 1250, 1191; LRMS (ESI): *m/z* 354 [M+Na]<sup>+</sup>; HRMS (ESI): *m/z* calcd for C<sub>15</sub>H<sub>16</sub>F<sub>3</sub>NO<sub>4</sub>Na [M+Na]<sup>+</sup> 354.0924, Found 354.0924.

#### ***N*-benzyloxy-3-(2,2-dimethylbutoxy)-3-trifluoromethyl-isoindolinone (S4c)**

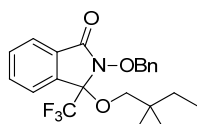

colorless liquid; <sup>1</sup>H NMR (500 MHz, CDCl<sub>3</sub>) δ: 7.91 (d, 1H, *J* = 7.4 Hz), 7.70 (dd, 1H, *J* = 7.4 Hz, 7.4 Hz), 7.65 (dd, 1H, *J* = 7.4 Hz, 7.4 Hz), 7.60 (d, 1H, *J* = 7.4 Hz), 7.55 (d, 2H, *J* = 7.4 Hz), 7.35-7.43 (m, 3H), 5.34 (d, 1H, *J* = 9.2 Hz), 5.14 (d, 1H, *J* = 9.2 Hz), 3.05 (d, 1H, *J* = 8.3 Hz), 2.58 (d, 1H, *J* = 8.3 Hz), 1.29 (q, 2H, *J* = 7.5 Hz), 0.84 (s, 3H), 0.82 (s, 3H), 0.73 (t, 3H, *J* = 7.5 Hz); <sup>13</sup>C NMR (126 MHz, CDCl<sub>3</sub>) δ: 165.7, 135.4, 134.6, 133.4, 131.6, 130.1, 129.2, 128.7, 128.4, 124.15, 124.13, 122.3 (q, *J* = 286.3 Hz), 90.8 (q, *J* = 32.3 Hz), 79.0, 71.7, 34.1, 31.1, 23.8, 23.7, 8.0; <sup>19</sup>F NMR (369 MHz, CDCl<sub>3</sub>) δ: -78.3; IR (neat, cm<sup>-1</sup>) ν: 2965, 1747, 1468, 1294, 1190; LRMS (ESI): *m/z* 430 [M+Na]<sup>+</sup>; HRMS (ESI): *m/z* calcd for C<sub>22</sub>H<sub>24</sub>F<sub>3</sub>NO<sub>3</sub>Na [M+Na]<sup>+</sup> 430.1601, Found 430.1614.

#### **3-(2,2-dimethylbutoxy)-*N*-hydroxy-3-trifluoromethyl-isoindolinone (1c)**

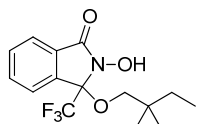

white solid; <sup>1</sup>H NMR (500 MHz, CDCl<sub>3</sub>) δ: 9.89 (brs, 1H), 7.79 (d, 1H, *J* = 7.4 Hz), 7.66 (dd, 1H, *J* = 7.4 Hz, 7.4 Hz), 7.56-7.62 (m, 2H), 3.16 (d, 1H, *J* = 8.0 Hz), 2.61 (d, 1H, *J* = 8.0 Hz), 1.29-1.40 (m, 2H), 0.91 (s, 3H), 0.88 (s, 3H), 0.81 (t, 3H, *J* = 7.4 Hz); <sup>13</sup>C NMR (126 MHz, CDCl<sub>3</sub>) δ: 165.8, 135.3, 133.2, 131.4, 130.0, 124.0, 123.8, 122.0 (q, *J* = 287.1 Hz), 90.9 (q, *J* = 32.8 Hz), 71.8, 34.1, 31.2, 23.8, 23.7, 8.1; <sup>19</sup>F NMR (369 MHz, CDCl<sub>3</sub>) δ: -78.6; IR (KBr, cm<sup>-1</sup>) ν: 3168, 2964, 2883, 1721, 1525, 1473, 1382, 1311, 1203; LRMS (ESI): *m/z* 340 [M+Na]<sup>+</sup>; HRMS (ESI): *m/z* calcd for C<sub>15</sub>H<sub>18</sub>F<sub>3</sub>NO<sub>3</sub>Na [M+Na]<sup>+</sup> 340.1131, Found 340.1117.

### 3-(2,2-dimethyl-3-oxobutoxy)-*N*-hydroxy-3-trifluoromethyl-isoindolinone (2c)

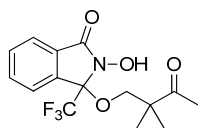

Starting material **1c** (31.7 mg, 0.1 mmol) was oxygenated under condition A of section 2, and **2c** (17.7 mg, 0.053 mmol) was isolated as described in the General method (53% yield).

white solid;  $^1\text{H}$  NMR (400 MHz,  $\text{CDCl}_3$ )  $\delta$ : 9.17 (brs, 1H), 7.84 (d, 1H,  $J = 7.2$  Hz), 7.54-7.70 (m, 3H), 3.49 (d, 1H,  $J = 8.7$  Hz), 2.87 (d, 1H,  $J = 8.7$  Hz), 2.23 (s, 3H), 1.23 (s, 3H), 1.11 (s, 3H);  $^{13}\text{C}$  NMR (126 MHz,  $\text{CDCl}_3$ )  $\delta$ : 213.4, 164.6, 134.2, 133.2, 131.7, 130.2, 124.1, 121.7 (q,  $J = 286.1$  Hz), 90.5 (q,  $J = 34.1$  Hz), 69.0, 47.9, 25.8, 22.0, 21.7;  $^{19}\text{F}$  NMR (369 MHz,  $\text{CDCl}_3$ )  $\delta$ : -78.4; IR (KBr,  $\text{cm}^{-1}$ )  $\nu$ : 3138, 2941, 1709, 1471, 1304, 1199; LRMS (ESI):  $m/z$  354 [ $\text{M}+\text{Na}$ ] $^+$ ; HRMS (ESI):  $m/z$  calcd for  $\text{C}_{15}\text{H}_{16}\text{F}_3\text{NO}_4\text{Na}$  [ $\text{M}+\text{Na}$ ] $^+$  354.0924, Found 354.0924.

### *N*-benzyloxy-3-hexoxy-3-trifluoromethyl-isoindolinone (S4d)

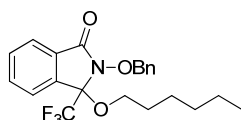

light yellow liquid;  $^1\text{H}$  NMR (400 MHz,  $\text{CDCl}_3$ )  $\delta$ : 7.90 (d, 1H,  $J = 6.7$  Hz), 7.59-7.72 (m, 3H), 7.53-7.58 (m, 2H), 7.35-7.43 (m, 3H), 5.31 (d, 1H,  $J = 9.9$  Hz), 5.14 (d, 1H,  $J = 9.9$  Hz), 3.25 (dt, 1H,  $J = 8.7$  Hz, 6.5 Hz), 2.93 (dt, 1H,  $J = 8.7$  Hz, 6.5 Hz), 1.47-1.57 (m, 2H), 1.13-1.34 (m, 6H), 0.82 (t, 3H,  $J = 7.0$  Hz);  $^{13}\text{C}$  NMR (126 MHz,  $\text{CDCl}_3$ )  $\delta$ : 165.6, 135.3, 134.6, 133.4, 131.6, 130.0, 129.3, 128.8, 128.4, 124.2, 124.1, 122.2 (q,  $J = 285.9$  Hz), 91.0 (q,  $J = 32.8$  Hz), 79.1, 64.2, 31.3, 28.9, 25.4, 22.4, 13.9;  $^{19}\text{F}$  NMR (369 MHz,  $\text{CDCl}_3$ )  $\delta$ : -78.1; IR (neat,  $\text{cm}^{-1}$ )  $\nu$ : 2934, 1746, 1468, 1294, 1188; LRMS (ESI):  $m/z$  430 [ $\text{M}+\text{Na}$ ] $^+$ ; HRMS (ESI):  $m/z$  calcd for  $\text{C}_{22}\text{H}_{24}\text{F}_3\text{NO}_3\text{Na}$  [ $\text{M}+\text{Na}$ ] $^+$  430.1601, Found 430.1604.

### 3-hexoxy-*N*-hydroxy-3-trifluoromethyl-isoindolinone (1d)

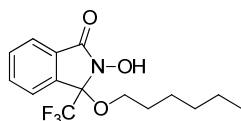

light yellow liquid;  $^1\text{H}$  NMR (500 MHz,  $\text{CDCl}_3$ )  $\delta$ : 9.88 (brs, 1H), 7.79 (d, 1H,  $J = 6.9$ ), 7.66 (dd, 1H,  $J = 6.9$  Hz, 7.5 Hz), 7.60 (d, 1H,  $J = 6.9$  Hz), 7.59 (dd, 1H,  $J = 6.9$  Hz, 7.5 Hz), 3.42 (dt, 1H,  $J = 8.6$  Hz, 6.3 Hz), 2.97 (dt, 1H,  $J = 8.6$  Hz, 6.3 Hz), 1.56-1.67 (m, 2H), 1.19-1.41 (m, 6H), 0.86 (t, 3H,  $J = 6.9$  Hz);  $^{13}\text{C}$  NMR (126 MHz,  $\text{CDCl}_3$ )  $\delta$ : 165.9, 135.3, 133.2, 131.4, 130.0, 124.0, 123.8, 121.9 (q,  $J = 286.7$  Hz), 91.0 (q,  $J = 32.4$  Hz), 64.4, 31.4, 29.0, 25.4, 22.5, 13.9;  $^{19}\text{F}$  NMR (369 MHz,  $\text{CDCl}_3$ )  $\delta$ : -78.5; IR (neat,  $\text{cm}^{-1}$ )  $\nu$ : 3141, 2935, 1718, 1470, 1200; LRMS (ESI):  $m/z$  340 [ $\text{M}+\text{Na}$ ] $^+$ ; HRMS (ESI):  $m/z$  calcd for  $\text{C}_{15}\text{H}_{18}\text{F}_3\text{NO}_3\text{Na}$  [ $\text{M}+\text{Na}$ ] $^+$  340.1131, Found 340.1117.

***N*-hydroxy-3-((3-oxohexyl)oxy)-3-trifluoromethyl-isoindolinone (2d)**

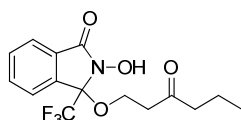

Starting material **1d** (95.2 mg, 0.3 mmol) was oxygenated under condition A of section 2, and regiomixture of **2d** + **2d'** (41.0 mg, 0.12 mmol) was obtained according to the procedure described in the General method (41% combined yield).

HPLC purification was required for the separation of the oxygenation products of 1-hexanol,  $\gamma$ -oxo- (**2d**) and  $\delta$ -oxo-1-hexanol (**2d'**), which were not separable by normal silica gel column chromatography.

column: Inertsil® Diol  $\phi$  20 mm x 250 mm  
eluent: hexane/CHCl<sub>3</sub> = 2/1  
flow rate: 9.5 mL/min  
RT: 46 min (**2d**), 83 min (**2d'**)

light yellow liquid; <sup>1</sup>H NMR (400 MHz, CDCl<sub>3</sub>)  $\delta$ : 8.99 (brs, 1H), 7.85 (d, 1H,  $J$  = 7.2 Hz), 7.56-7.67 (m, 3H), 3.52-3.60 (m, 1H), 3.21-3.28 (m, 1H), 2.81-2.91 (m, 1H), 2.61-2.69 (m, 1H), 2.44 (t, 2H,  $J$  = 7.2 Hz), 1.54-1.65 (m, 2H), 0.89 (t, 3H,  $J$  = 7.4 Hz); <sup>13</sup>C NMR (100 MHz, CDCl<sub>3</sub>)  $\delta$ : 210.7, 163.9, 133.9, 133.0, 131.6, 130.4, 124.1, 121.7 (q,  $J$  = 286.3 Hz), 90.5 (q,  $J$  = 34.1 Hz), 57.9, 45.1, 41.1, 17.0, 13.4; <sup>19</sup>F NMR (369 MHz, CDCl<sub>3</sub>)  $\delta$ : -78.2; IR (neat, cm<sup>-1</sup>)  $\nu$ : 3219, 2964, 1717, 1469, 1302, 1198; LRMS (ESI):  $m/z$  354 [M+Na]<sup>+</sup>; HRMS (ESI):  $m/z$  calcd for C<sub>15</sub>H<sub>16</sub>F<sub>3</sub>NO<sub>4</sub>Na [M+Na]<sup>+</sup> 354.0924, Found 354.0929.

***N*-hydroxy-3-((4-oxohexyl)oxy)-3-trifluoromethyl-isoindolinone (2d')**

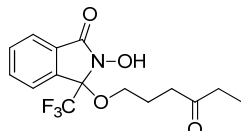

light yellow liquid; <sup>1</sup>H NMR (400 MHz, CDCl<sub>3</sub>)  $\delta$ : 9.50 (brs, 1H), 7.83 (d, 1H,  $J$  = 7.6 Hz), 7.55-7.68 (m, 3H), 3.25-3.32 (m, 1H), 3.07-3.14 (m, 1H), 2.54-2.69 (m, 2H), 2.48 (q, 2H,  $J$  = 7.3 Hz), 1.80-2.00 (m, 2H), 1.04 (t, 3H,  $J$  = 7.3 Hz); <sup>13</sup>C NMR (126 MHz, CDCl<sub>3</sub>)  $\delta$ : 212.5, 165.2, 134.8, 133.2, 131.6, 130.1, 124.1, 124.0, 121.9 (q,  $J$  = 286.7 Hz), 90.8 (q,  $J$  = 33.2 Hz), 62.8, 38.3, 35.9, 23.4, 7.7; <sup>19</sup>F NMR (369 MHz, CDCl<sub>3</sub>)  $\delta$ : -78.3; IR (neat, cm<sup>-1</sup>)  $\nu$ : 3218, 2925, 1716, 1469, 1190; LRMS (ESI):  $m/z$  354 [M+Na]<sup>+</sup>; HRMS (ESI):  $m/z$  calcd for C<sub>15</sub>H<sub>16</sub>F<sub>3</sub>NO<sub>4</sub>Na [M+Na]<sup>+</sup> 354.0924, Found 354.0929.

**5-((*N*-benzyloxy-3-oxo-1-(trifluoromethyl)isoindolin-1-yl)oxy)pentyl acetate (S4e)**

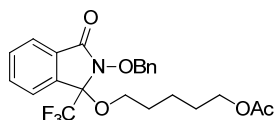

light yellow liquid; <sup>1</sup>H NMR (500 MHz, CDCl<sub>3</sub>)  $\delta$ : 7.89 (d, 1H,  $J$  = 7.5 Hz), 7.69 (ddd, 1H, 1.2 Hz, 7.5 Hz, 7.5 Hz), 7.63 (ddd, 1H,  $J$  = 1.2 Hz, 7.5 Hz, 7.5 Hz), 7.60 (d, 2H,  $J$  = 7.5 Hz), 7.52-7.56 (m, 2H), 7.34-7.41

(m, 3H), 5.31 (d, 1H,  $J = 9.8$  Hz), 5.12 (d, 1H,  $J = 9.8$  Hz), 3.96 (t, 2H,  $J = 6.3$  Hz), 3.23 (dt, 1H,  $J = 8.6$  Hz, 6.3 Hz), 2.93 (dt, 1H,  $J = 8.6$  Hz, 6.3 Hz), 1.50-1.57 (m, 4H), 1.30-1.38 (m, 2H);  $^{13}\text{C}$  NMR (126 MHz,  $\text{CDCl}_3$ )  $\delta$ : 171.0, 165.6, 135.2, 134.5, 133.5, 131.6, 130.0, 129.3, 128.8, 128.4, 124.1, 122.2 (q,  $J = 285.5$  Hz), 90.8 (q,  $J = 33.6$  Hz), 79.1, 64.1, 63.7, 28.5, 28.0, 22.2, 20.8;  $^{19}\text{F}$  NMR (369 MHz,  $\text{CDCl}_3$ )  $\delta$ : -78.1; IR (neat,  $\text{cm}^{-1}$ )  $\nu$ : 2951, 1741, 1469, 1367, 1244, 1189; LRMS (ESI):  $m/z$  474  $[\text{M}+\text{Na}]^+$ ; HRMS (ESI):  $m/z$  calcd for  $\text{C}_{23}\text{H}_{24}\text{F}_3\text{NO}_5\text{Na}$   $[\text{M}+\text{Na}]^+$  474.1499, Found 474.1496.

#### 5-((*N*-hydroxy-3-oxo-1-(trifluoromethyl)isoindolin-1-yl)oxy)pentyl acetate (**1e**)

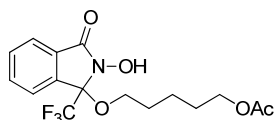

light yellow liquid;  $^1\text{H}$  NMR (500 MHz,  $\text{CDCl}_3$ )  $\delta$ : 9.76 (brs, 1H), 7.80 (d, 1H,  $J = 7.5$  Hz), 7.66 (ddd, 1H,  $J = 1.2$  Hz, 7.5 Hz, 7.5 Hz), 7.60 (dd, 2H,  $J = 7.5$  Hz, 7.5 Hz), 4.06 (t, 2H,  $J = 6.9$  Hz), 3.40 (dt, 1H,  $J = 9.2$  Hz, 6.3 Hz), 2.98 (dt, 1H,  $J = 9.2$  Hz, 6.3 Hz), 2.02 (s, 3H), 1.57-1.67 (m, 4H), 1.34-1.50 (m, 2H);  $^{13}\text{C}$  NMR (126 MHz,  $\text{CDCl}_3$ )  $\delta$ : 171.5, 165.7, 135.1, 133.2, 131.5, 130.0, 124.0, 123.9, 121.9 (q,  $J = 285.5$  Hz), 90.9 (q,  $J = 33.6$  Hz), 64.3, 63.9, 28.5, 28.1, 22.2, 20.9;  $^{19}\text{F}$  NMR (369 MHz,  $\text{CDCl}_3$ )  $\delta$ : -78.5; IR (neat,  $\text{cm}^{-1}$ )  $\nu$ : 3175, 2955, 1736, 1470, 1241, 1198; LRMS (ESI):  $m/z$  384  $[\text{M}+\text{Na}]^+$ ; HRMS (ESI):  $m/z$  calcd for  $\text{C}_{16}\text{H}_{18}\text{F}_3\text{NO}_5\text{Na}$   $[\text{M}+\text{Na}]^+$  384.1029, Found 384.1039.

#### 5-((*N*-hydroxy-3-oxo-1-(trifluoromethyl)isoindolin-1-yl)oxy)-3-oxopentyl acetate (**2e**)

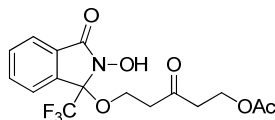

Starting material **1e** (36.1 mg, 0.1 mmol) was oxygenated under condition A of section 2, and **2e** (13.8 mg, 0.037 mmol) was isolated as described in the General method (37% yield).

light yellow liquid;  $^1\text{H}$  NMR (500 MHz,  $\text{CDCl}_3$ )  $\delta$ : 8.58 (brs, 1H), 7.88 (d, 1H,  $J = 7.4$  Hz), 7.58-7.69 (m, 3H), 4.34 (t, 2H,  $J = 6.0$  Hz), 3.59 (dt, 1H,  $J = 3.4$  Hz, 9.5 Hz), 3.26-3.30 (m, 1H), 2.93 (ddd, 1H,  $J = 18.3$  Hz, 3.4 Hz, 1.8 Hz), 2.83 (t, 2H,  $J = 6.0$  Hz), 2.70 (ddd, 1H,  $J = 18.3$  Hz, 3.4 Hz, 1.8 Hz), 2.02 (s, 3H);  $^{13}\text{C}$  NMR (126 MHz,  $\text{CDCl}_3$ )  $\delta$ : 207.4, 170.9, 163.9, 133.9, 133.0, 131.8, 130.4, 124.2, 124.1, 121.7 (q,  $J = 286.7$  Hz), 90.5 (q,  $J = 33.6$  Hz), 58.8, 57.7, 41.9, 41.6, 20.7;  $^{19}\text{F}$  NMR (369 MHz,  $\text{CDCl}_3$ )  $\delta$ : -78.2; IR (neat,  $\text{cm}^{-1}$ )  $\nu$ : 3302, 2955, 1738, 1469, 1370, 1191; LRMS (ESI):  $m/z$  398  $[\text{M}+\text{Na}]^+$ ; HRMS (ESI):  $m/z$  calcd for  $\text{C}_{16}\text{H}_{16}\text{F}_3\text{NO}_6\text{Na}$   $[\text{M}+\text{Na}]^+$  398.0822, Found 398.0808.

#### 2-(5-((2-(benzyloxy)-3-oxo-1-(trifluoromethyl)isoindolin-1-yl)oxy)pentyl)isoindoline-1,3-dione (**S4f**)

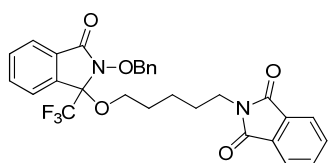



light yellow solid;  $^1\text{H}$  NMR (500 MHz,  $\text{CDCl}_3$ )  $\delta$ : 7.88 (d, 1H,  $J = 7.4$  Hz), 7.78-7.83 (m, 2H), 7.66-7.72 (m, 3H), 7.58-7.65 (m, 2H), 7.54 (d, 2H,  $J = 6.9$  Hz), 7.31-7.40 (m, 3H), 5.29 (d, 1H,  $J = 9.7$  Hz), 5.12 (d, 1H,  $J = 9.7$  Hz), 3.60 (t, 2H,  $J = 7.2$  Hz), 3.20-3.26 (m, 1H), 2.88-2.94 (m, 1H), 1.48-1.64 (m, 4H), 1.23-1.39 (m, 2H);  $^{13}\text{C}$  NMR (126 MHz,  $\text{CDCl}_3$ )  $\delta$ : 168.3, 165.6, 135.2, 134.6, 133.8, 133.5, 132.0, 131.6, 129.9, 129.3, 128.8, 128.4, 124.2, 124.1, 123.1, 122.1 (q,  $J = 286.0$  Hz), 90.9 (q,  $J = 32.9$  Hz), 79.1, 63.7, 37.6, 28.4, 28.1, 23.1;  $^{19}\text{F}$  NMR (369 MHz,  $\text{CDCl}_3$ )  $\delta$ : -78.0; IR (KBr,  $\text{cm}^{-1}$ )  $\nu$ : 3463, 3038, 2948, 2893, 1742, 1707, 1607, 1194; LRMS (ESI):  $m/z$  561  $[\text{M}+\text{Na}]^+$ ; HRMS (ESI):  $m/z$  calcd for  $\text{C}_{29}\text{H}_{25}\text{F}_3\text{N}_2\text{O}_5\text{Na}$   $[\text{M}+\text{Na}]^+$  561.1608, Found 561.1587.

**2-(5-((2-hydroxy-3-oxo-1-(trifluoromethyl)isoindolin-1-yl)oxy)pentyl)isoindoline-1,3-dione (1f)**

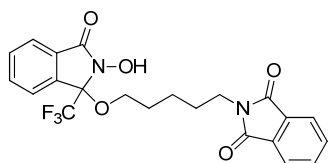

white solid;  $^1\text{H}$  NMR (400 MHz, acetone- $d_6$ )  $\delta$ : 9.55 (brs, 1H), 7.66-7.84 (m, 8H), 3.61 (t, 2H,  $J = 7.2$  Hz), 3.36-3.44 (m, 1H), 2.95-3.04 (m, 1H), 1.55-1.71 (m, 4H), 1.28-1.48 (m, 2H);  $^{13}\text{C}$  NMR (100 MHz, acetone- $d_6$ )  $\delta$ : 168.7, 164.6, 135.7, 134.9, 134.1, 132.9, 132.6, 131.5, 125.1, 124.2, 123.6, 123.3 (q,  $J = 286.6$  Hz), 91.4 (q,  $J = 31.9$  Hz), 64.2, 38.1, 29.2, 28.7, 23.8;  $^{19}\text{F}$  NMR (369 MHz, acetone- $d_6$ )  $\delta$ : -78.7; IR (KBr,  $\text{cm}^{-1}$ )  $\nu$ : 3524, 3368, 2940, 2889, 2712, 1731, 1699, 1200; LRMS (ESI):  $m/z$  471  $[\text{M}+\text{Na}]^+$ ; HRMS (ESI):  $m/z$  calcd for  $\text{C}_{22}\text{H}_{19}\text{F}_3\text{N}_2\text{O}_5\text{Na}$   $[\text{M}+\text{Na}]^+$  471.1138, Found 471.1119.

**2-(5-((2-hydroxy-3-oxo-1-(trifluoromethyl)isoindolin-1-yl)oxy)-3-oxopentyl)isoindoline-1,3-dione (2f)**

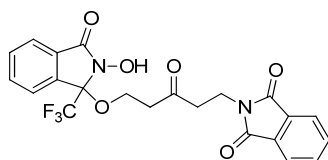

Starting material **1f** (89.7 mg, 0.2 mmol) was oxygenated under condition A of section 2, and **2f** (30.9 mg, 0.067 mmol) was isolated as described in the General method (33% yield).

light yellow liquid;  $^1\text{H}$  NMR (500 MHz,  $\text{CDCl}_3$ )  $\delta$ : 8.32 (brs, 1H), 7.89 (dd, 1H,  $J = 6.3$  Hz, 1.1 Hz), 7.84 (dd, 2H,  $J = 3.1$  Hz, 5.6 Hz), 7.72 (dd, 2H,  $J = 3.1$  Hz, 5.6 Hz), 7.58-7.69 (m, 3H), 3.98 (t, 2H,  $J = 7.2$  Hz), 3.57 (dt, 1H,  $J = 2.9$  Hz, 9.7 Hz), 3.23-3.28 (m, 1H), 2.91-3.02 (m, 3H), 2.67-2.75 (m, 1H);  $^{13}\text{C}$  NMR (126 MHz,  $\text{CDCl}_3$ )  $\delta$ : 207.7, 168.1, 163.8, 134.1, 133.9, 133.0, 131.8, 131.7, 130.4, 124.2, 124.1, 123.4, 121.7 (q,  $J = 286.6$  Hz), 90.5 (q,  $J = 33.6$  Hz), 57.7, 41.3, 41.2, 32.7;  $^{19}\text{F}$  NMR (369 MHz,  $\text{CDCl}_3$ )  $\delta$ : -78.1; IR (neat,  $\text{cm}^{-1}$ )  $\nu$ : 3222, 2950, 1714, 1469, 1397, 1374, 1191; LRMS (ESI):  $m/z$  485  $[\text{M}+\text{Na}]^+$ ; HRMS (ESI):  $m/z$  calcd for  $\text{C}_{22}\text{H}_{17}\text{F}_3\text{N}_2\text{O}_6\text{Na}$   $[\text{M}+\text{Na}]^+$  485.0931, Found 485.0941.

**methyl 6-((2-(benzyloxy)-3-oxo-1-(trifluoromethyl)isoindolin-1-yl)oxy)hexanoate (S4g)**

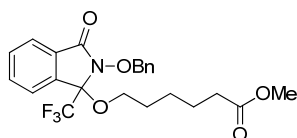

colorless liquid;  $^1\text{H}$  NMR (500 MHz,  $\text{CDCl}_3$ )  $\delta$ : 7.89 (d, 1H,  $J = 7.4$  Hz), 7.58-7.71 (m, 3H), 7.52-7.57 (m, 2H), 7.34-7.42 (m, 3H), 5.31 (d, 1H,  $J = 9.5$  Hz), 5.13 (d, 1H,  $J = 9.5$  Hz), 3.63 (s, 3H), 3.20-3.26 (m, 1H), 2.90-2.96 (m, 1H), 2.22 (t, 2H,  $J = 7.4$  Hz), 1.47-1.58 (m, 4H), 1.24-1.36 (m, 2H);  $^{13}\text{C}$  NMR (126 MHz,  $\text{CDCl}_3$ )  $\delta$ : 173.9, 165.6, 135.2, 134.6, 133.5, 131.6, 130.0, 129.3, 128.8, 128.4, 124.2, 124.1, 122.1 (q,  $J = 286.0$  Hz), 90.1 (q,  $J = 32.9$  Hz), 79.1, 63.8, 51.4, 33.7, 28.6, 25.3, 24.4;  $^{19}\text{F}$  NMR (369 MHz,  $\text{CDCl}_3$ )  $\delta$ : -78.1; IR (neat,  $\text{cm}^{-1}$ )  $\nu$ : 2950, 1741, 1468, 1194; LRMS (ESI):  $m/z$  474  $[\text{M}+\text{Na}]^+$ ; HRMS (ESI):  $m/z$  calcd for  $\text{C}_{23}\text{H}_{24}\text{F}_3\text{NO}_5\text{Na}$   $[\text{M}+\text{Na}]^+$  474.1499, Found 474.1515.

**methyl 6-((2-hydroxy-3-oxo-1-(trifluoromethyl)isoindolin-1-yl)oxy)hexanoate (1g)**

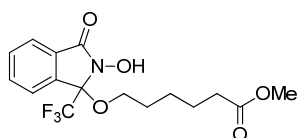

red liquid;  $^1\text{H}$  NMR (500 MHz,  $\text{CDCl}_3$ )  $\delta$ : 9.71 (brs, 1H), 7.81 (d, 1H,  $J = 7.4$  Hz), 7.63-7.68 (m, 1H), 7.56-7.62 (m, 2H), 3.64 (s, 3H), 3.36-3.42 (m, 1H), 2.95-3.01 (m, 1H), 2.29 (t, 2H,  $J = 7.4$  Hz), 1.55-1.66 (m, 4H), 1.30-1.46 (m, 2H);  $^{13}\text{C}$  NMR (126 MHz,  $\text{CDCl}_3$ )  $\delta$ : 174.4, 165.6, 135.0, 133.2, 131.5, 130.0, 124.0, 123.9, 121.9 (q,  $J = 286.7$  Hz), 90.9 (q,  $J = 32.8$  Hz), 63.8, 51.6, 33.8, 28.5, 25.2, 24.3;  $^{19}\text{F}$  NMR (369 MHz,  $\text{CDCl}_3$ )  $\delta$ : -78.4; IR (neat,  $\text{cm}^{-1}$ )  $\nu$ : 3177, 2951, 1719, 1469, 1303, 1199; LRMS (ESI):  $m/z$  384  $[\text{M}+\text{Na}]^+$ ; HRMS (ESI):  $m/z$  calcd for  $\text{C}_{16}\text{H}_{18}\text{F}_3\text{NO}_5\text{Na}$   $[\text{M}+\text{Na}]^+$  384.1029, Found 384.1029.

**methyl 6-((2-hydroxy-3-oxo-1-(trifluoromethyl)isoindolin-1-yl)oxy)-4-oxohexanoate (2g)**

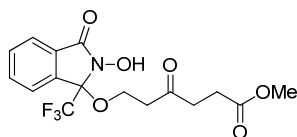

Starting material **1g** (72.3mg, 0.2 mmol) was oxygenated under condition A of section 2, and **2g** (22.2 mg, 0.059 mmol) was isolated as described in the General method (30% yield).

light yellow liquid;  $^1\text{H}$  NMR (500 MHz,  $\text{CDCl}_3$ )  $\delta$ : 8.60 (brs, 1H), 7.88 (d, 1H,  $J = 8.0$  Hz), 7.57-7.68 (m, 3H), 3.67 (s, 3H), 3.57 (dt, 1H,  $J = 2.5$  Hz, 9.6 Hz), 3.24-3.29 (m, 1H), 2.97 (ddd, 1H,  $J = 18.3$  Hz, 10.0 Hz, 3.7 Hz), 2.62-2.87 (m, 4H), 2.55-2.62 (m, 1H);  $^{13}\text{C}$  NMR (126 MHz,  $\text{CDCl}_3$ )  $\delta$ : 208.8, 173.1, 163.7, 133.8, 132.9, 131.7, 130.5, 124.2, 124.1, 121.2 (q,  $J = 286.6$  Hz), 90.5 (q,  $J = 33.6$  Hz), 57.8, 52.0, 41.4, 37.5, 27.6;  $^{19}\text{F}$  NMR (369 MHz,  $\text{CDCl}_3$ )  $\delta$ : -78.1; IR (neat,  $\text{cm}^{-1}$ )  $\nu$ : 3222, 2954, 1718, 1197; LRMS (ESI):  $m/z$  398  $[\text{M}+\text{Na}]^+$ ; HRMS (ESI):  $m/z$  calcd for  $\text{C}_{16}\text{H}_{16}\text{F}_3\text{NO}_6\text{Na}$   $[\text{M}+\text{Na}]^+$  398.0822, Found 398.0804.

**N-benzyloxy-3-(2-cyclohexylethoxy)-3-trifluoromethyl-isoindolinone (S4i)**

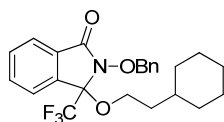

light yellow liquid;  $^1\text{H}$  NMR (500 MHz,  $\text{CDCl}_3$ )  $\delta$ : 7.90 (d, 1H, 7.5 Hz), 7.67-7.72 (m, 1H), 7.60-7.66 (m, 2H), 7.57 (dd,  $J = 1.2$  Hz 8.1 Hz), 7.35-7.43 (m, 3H), 5.33 (d, 1H,  $J = 9.7$  Hz), 5.15 (d, 1H,  $J = 9.7$  Hz), 3.31 (dd, 1H,  $J = 8.6$  Hz, 6.9 Hz), 2.99 (dd, 1H,  $J = 8.6$  Hz, 6.9 Hz), 1.50-1.65 (m, 5H), 1.40-1.45 (m, 2H), 1.26-1.38 (m, 1H), 1.02-1.20 (m, 3H), 0.74-0.83 (m, 2H);  $^{13}\text{C}$  NMR (126 MHz,  $\text{CDCl}_3$ )  $\delta$ : 165.6, 135.3, 134.6, 133.4, 131.6, 130.0, 129.3, 128.8, 128.4, 124.13, 124.10, 122.2 (q,  $J = 287.6$  Hz), 90.9 (q,  $J = 33.6$  Hz), 79.1, 62.1, 36.4, 34.1, 33.2, 33.05, 33.02, 26.3, 26.05, 25.96;  $^{19}\text{F}$  NMR (369 MHz,  $\text{CDCl}_3$ )  $\delta$ : -78.1; IR (neat,  $\text{cm}^{-1}$ )  $\nu$ : 2924, 1746, 1664, 1468, 1295, 1189; LRMS (ESI):  $m/z$  456  $[\text{M}+\text{Na}]^+$ ; HRMS (ESI):  $m/z$  calcd for  $\text{C}_{24}\text{H}_{26}\text{F}_3\text{NO}_3\text{Na}$   $[\text{M}+\text{Na}]^+$  456.1757, Found 456.1754.

### 3-(2-cyclohexylethoxy)-*N*-hydroxy-3-trifluoromethyl-isoindolinone (**1i**)

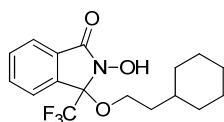

white solid;  $^1\text{H}$  NMR (500 MHz,  $\text{CDCl}_3$ )  $\delta$ : 9.87 (s, 1H), 7.79 (d, 1H,  $J = 8.0$  Hz), 7.66 (dd, 1H,  $J = 8.0$  Hz, 7.4 Hz), 7.57-7.62 (m, 2H), 3.47 (dt, 1H,  $J = 8.0$  Hz, 6.9 Hz), 3.00 (dt, 1H,  $J = 8.0$  Hz, 6.9 Hz), 1.47-1.69 (m, 6H), 1.32-1.43 (m, 1H), 1.05-1.28 (m, 4H), 0.88-0.90 (m, 2H);  $^{13}\text{C}$  NMR (126 MHz,  $\text{CDCl}_3$ )  $\delta$ : 165.9, 135.3, 133.2, 131.4, 130.0, 124.0, 123.9, 121.9 (q,  $J = 286.7$  Hz), 91.0 (q,  $J = 32.4$  Hz), 62.4, 36.4, 34.2, 33.2, 33.0, 26.4, 26.2, 26.1;  $^{19}\text{F}$  NMR (369 MHz,  $\text{CDCl}_3$ )  $\delta$ : -78.5; IR (KBr,  $\text{cm}^{-1}$ )  $\nu$ : 3176, 3114, 2933, 2854, 1721, 1452, 1309, 1185; LRMS (ESI):  $m/z$  366  $[\text{M}+\text{Na}]^+$ ; HRMS (ESI):  $m/z$  calcd for  $\text{C}_{17}\text{H}_{20}\text{F}_3\text{NO}_3\text{Na}$   $[\text{M}+\text{Na}]^+$  366.1288, Found 366.1277.

### *N*-hydroxy-3-(2-(1-hydroxycyclohexyl)ethoxy)-3-trifluoromethyl-isoindolinone (**2i**)

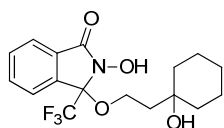

Starting material **1i** (1.02 g, 2.97 mmol) was oxygenated under condition B of section 2, and **2i** (597 mg, 1.66 mmol) was isolated as described in the General method (56% yield).

white solid;  $^1\text{H}$  NMR (500 MHz,  $\text{CDCl}_3$ )  $\delta$ : 9.42 (s, 1H), 7.88 (d, 1H,  $J = 7.5$  Hz), 7.58-7.68 (m, 3H), 3.53 (dt, 1H,  $J = 3.4$  Hz, 9.8 Hz), 3.27-3.33 (m, 1H), 1.96 (ddd, 1H,  $J = 4.6$  Hz, 5.7 Hz, 14.9 Hz), 1.84-1.91 (m, 1H), 1.22-1.66 (m, 10H);  $^{13}\text{C}$  NMR (126 MHz, acetone- $d_6$ )  $\delta$ : 164.2, 135.6, 133.9, 132.7, 131.8, 125.2, 124.3, 123.3 (q,  $J = 285.5$  Hz), 91.4 (q,  $J = 32.4$  Hz), 70.7, 61.0, 41.4, 38.6, 38.5, 26.4, 22.7;  $^{19}\text{F}$  NMR (369 MHz, acetone- $d_6$ )  $\delta$ : -78.8; IR (KBr,  $\text{cm}^{-1}$ )  $\nu$ : 3321, 2933, 2857, 2771, 1720, 1473, 1193; LRMS (ESI):  $m/z$  382  $[\text{M}+\text{Na}]^+$ ; HRMS (ESI):  $m/z$  calcd for  $\text{C}_{17}\text{H}_{20}\text{F}_3\text{NO}_4\text{Na}$   $[\text{M}+\text{Na}]^+$  382.1237, Found 382.1249.

### *N*-benzyloxy-3-cyclohexylmethoxy-3-trifluoromethyl-isoindolinone (**S4j**)

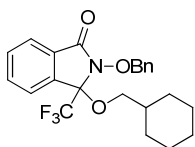

light yellow liquid;  $^1\text{H NMR}$  (400 MHz,  $\text{CDCl}_3$ )  $\delta$ : 7.90 (d, 1H,  $J = 7.6$  Hz), 7.69 (ddd, 1H,  $J = 1.3$  Hz, 7.6 Hz, 7.6 Hz), 7.64 (dd, 1H,  $J = 7.6$  Hz, 7.6 Hz), 7.54-7.62 (m, 3H), 7.35-7.44 (m, 3H), 5.32 (d, 1H,  $J = 9.9$  Hz), 5.26 (d, 1H,  $J = 9.9$  Hz), 3.11 (dd, 1 H,  $J = 6.3$  Hz, 8.5 Hz), 2.71 (dd, 1H,  $J = 6.7$  Hz, 8.5 Hz), 1.71-1.82 (m, 1H), 1.50-1.71 (m, 5H), 1.02-1.28 (m, 3H), 0.76-0.89 (m, 2H);  $^{13}\text{C NMR}$  (100 MHz,  $\text{CDCl}_3$ )  $\delta$ : 165.6, 135.3, 134.6, 133.4, 131.6, 130.0, 129.3, 128.7, 128.4, 124.2, 124.1, 122.2 (q,  $J = 285.6$  Hz), 90.9 (q,  $J = 32.0$  Hz), 79.0, 69.2, 37.3, 29.7, 29.4, 26.3, 25.6, 25.5;  $^{19}\text{F NMR}$  (369 MHz,  $\text{CDCl}_3$ )  $\delta$ : -78.0; IR (neat,  $\text{cm}^{-1}$ )  $\nu$ : 2927, 1746, 1648, 1291, 1187; LRMS (ESI):  $m/z$  442  $[\text{M}+\text{Na}]^+$ ; HRMS (ESI):  $m/z$  calcd for  $\text{C}_{23}\text{H}_{24}\text{F}_3\text{NO}_3\text{Na}$   $[\text{M}+\text{Na}]^+$  442.1601, Found 442.1620.

### 3-cyclohexylmethoxy-*N*-hydroxy-3-trifluoromethyl-isoindolinone (1j)

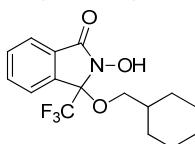

white solid;  $^1\text{H NMR}$  (500 MHz,  $\text{CDCl}_3$ )  $\delta$ : 9.86 (brs, 1H), 7.89 (d, 1H,  $J = 7.5$  Hz), 7.66 (dd, 1H,  $J = 7.5$  Hz, 7.5 Hz), 7.60 (dd, 2H,  $J = 7.5$  Hz, 7.5 Hz), 3.24 (dd, 1H,  $J = 6.3$  Hz, 8.1 Hz), 2.73 (dd, 1H,  $J = 7.5$  Hz, 7.5 Hz), 1.62-1.82 (m, 6H), 1.18-1.30 (m, 2H), 1.07-1.18 (m, 1H), 0.81-0.98 (m, 2H);  $^{13}\text{C NMR}$  (126 MHz,  $\text{CDCl}_3$ )  $\delta$ : 165.8, 135.3, 133.2, 131.4, 130.0, 124.1, 123.8, 121.9 (q,  $J = 285.5$  Hz), 91.0 (q,  $J = 33.6$  Hz), 69.5, 37.3, 29.7, 29.4, 26.4, 25.7, 25.6;  $^{19}\text{F NMR}$  (369 MHz,  $\text{CDCl}_3$ )  $\delta$ : -78.5; IR (KBr,  $\text{cm}^{-1}$ )  $\nu$ : 3117, 2925, 2856, 1708, 1473, 13990, 1309, 1184; LRMS (ESI):  $m/z$  352  $[\text{M}+\text{Na}]^+$ ; HRMS (ESI):  $m/z$  calcd for  $\text{C}_{16}\text{H}_{18}\text{F}_3\text{NO}_3\text{Na}$   $[\text{M}+\text{Na}]^+$  352.1131, Found 352.1118.

### *N*-hydroxy-3-((1-hydroxycyclohexyl)methoxy)-3-trifluoromethyl-isoindolinone (2j)

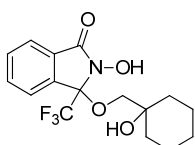

Starting material **1j** (32.9 mg, 0.1 mmol) was oxygenated under condition B of section 2, and **2j** (9.2 mg, 0.027 mmol) was isolated as described in the General method (27% yield).

white solid;  $^1\text{H NMR}$  (500 MHz,  $\text{CDCl}_3$ )  $\delta$ : 8.97 (brs, 1H), 7.84 (d, 1H,  $J = 6.9$  Hz), 7.61-7.70 (m, 3H), 3.33 (d, 1H,  $J = 11.5$  Hz), 2.99 (d, 1H,  $J = 11.5$  Hz), 1.89-1.97 (m, 1H), 1.48-1.70 (m, 5H), 1.39-1.48 (m, 2H), 1.24-1.34 (m, 2H);  $^{13}\text{C NMR}$  (100 MHz,  $\text{CDCl}_3$ )  $\delta$ : 163.9, 134.7, 133.0, 131.6, 130.8, 124.0, 123.8, 121.9 (q,  $J = 286.6$  Hz), 91.0 (q,  $J = 33.2$  Hz), 73.4, 71.6, 34.1, 32.7, 25.6, 21.5;  $^{19}\text{F NMR}$  (369 MHz,  $\text{CDCl}_3$ )  $\delta$ : -78.0; IR (neat,  $\text{cm}^{-1}$ )  $\nu$ : 3318, 2936, 2861, 1723, 1469, 1298, 1191; LRMS (ESI):  $m/z$  368  $[\text{M}+\text{Na}]^+$ ; HRMS (ESI):  $m/z$  calcd for  $\text{C}_{16}\text{H}_{18}\text{F}_3\text{NO}_4\text{Na}$   $[\text{M}+\text{Na}]^+$  368.1080, Found 368.1092.

**(R)-N-benzyloxy-3-(((1S,2R,5S)-2-isopropyl-5-methylcyclohexyl)oxy)-3-trifluoromethyl-isoindolinone ((R)-S4k)**

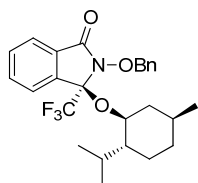

white solid;  $^1\text{H}$  NMR (500 MHz,  $\text{CDCl}_3$ )  $\delta$ : 7.88 (dd, 1H,  $J = 1.7$  Hz, 6.3 Hz), 7.67-7.71 (m, 1H), 7.59-7.67 (m, 2H), 7.55 (dd, 2H,  $J = 1.7$  Hz, 7.4 Hz), 7.36-7.42 (m, 3H), 5.46 (d, 1H,  $J = 8.6$  Hz), 5.01 (d, 1H,  $J = 8.6$  Hz), 3.40 (dt, 1H,  $J = 4.6$  Hz 10.4 Hz), 2.31-2.41 (m, 1H), 1.43-1.55 (m, 2H), 1.22-1.29 (m, 1H), 0.90-1.01 (m, 1H), 0.75-0.84 (m, 2H), 0.79 (d, 3H,  $J = 6.9$  Hz), 0.58-0.71 (m, 2H), 0.54 (d, 1H,  $J = 6.9$  Hz), 0.33 (d, 3H,  $J = 6.9$  Hz);  $^{13}\text{C}$  NMR (126 MHz,  $\text{CDCl}_3$ )  $\delta$ : 164.7, 138.1, 134.0, 132.9, 131.3, 130.0, 129.0, 128.9, 128.3, 124.7, 123.8, 122.7 (q,  $J = 286.7$  Hz), 89.1 (q,  $J = 33.6$  Hz), 78.6, 76.0, 48.6, 42.5, 33.7, 31.1, 24.4, 22.8, 22.0, 21.4, 16.0;  $^{19}\text{F}$  NMR (369 MHz,  $\text{CDCl}_3$ )  $\delta$ : -78.3; IR (KBr,  $\text{cm}^{-1}$ )  $\nu$ : 3037, 2954, 2931, 2863, 1740, 1616, 1187; LRMS (ESI):  $m/z$  484  $[\text{M}+\text{Na}]^+$ ; HRMS (ESI):  $m/z$  calcd for  $\text{C}_{26}\text{H}_{30}\text{F}_3\text{NO}_3\text{Na}$   $[\text{M}+\text{Na}]^+$  484.2070, Found 484.2088.

**(R)-N-hydroxy-3-(((1S,2R,5S)-2-isopropyl-5-methylcyclohexyl)oxy)-3-trifluoromethyl-isoindolinone ((R)-1k)**

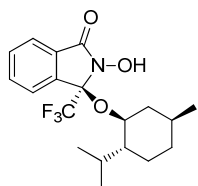

reddish solid;  $^1\text{H}$  NMR (400 MHz,  $\text{CDCl}_3$ )  $\delta$ : 9.74 (brs, 1H), 7.76 (d, 1H,  $J = 6.7$  Hz), 7.53-7.67 (m, 3H), 3.64 (dt, 1H,  $J = 4.3$  Hz, 10.4 Hz), 2.45-2.57 (m, 1H), 1.58-1.68 (m, 1H), 1.49-1.58 (m, 1H), 1.28-1.43 (m, 1H), 0.87-1.15 (m, 3H), 0.95 (d, 3H,  $J = 7.2$  Hz), 0.83 (d, 3H,  $J = 6.7$  Hz), 0.59 (d, 3H,  $J = 6.7$  Hz);  $^{13}\text{C}$  NMR (100 MHz,  $\text{CDCl}_3$ )  $\delta$ : 165.7, 138.0, 132.8, 131.2, 128.9, 124.7, 123.6, 122.2 (q,  $J = 287.5$  Hz), 90.1 (q,  $J = 32.6$  Hz), 76.7, 48.6, 42.8, 33.9, 31.2, 24.9, 23.0, 22.0, 21.4, 15.9;  $^{19}\text{F}$  NMR (369 MHz,  $\text{CDCl}_3$ )  $\delta$ : -78.5; IR (KBr,  $\text{cm}^{-1}$ )  $\nu$ : 3198, 2959, 2871, 1719, 1472, 1375, 1290, 1192; LRMS (ESI):  $m/z$  394  $[\text{M}+\text{Na}]^+$ ; HRMS (ESI):  $m/z$  calcd for  $\text{C}_{19}\text{H}_{24}\text{F}_3\text{NO}_3\text{Na}$   $[\text{M}+\text{Na}]^+$  394.1601, Found 394.1611.

**(R)-N-hydroxy-3-(((1S,2S,5S)-2-(2-hydroxypropan-2-yl)-5-methylcyclohexyl)oxy)-3-trifluoromethyl-isoindolinone ((R)-2k)**

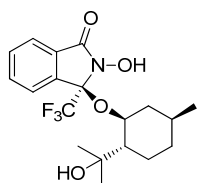

Starting material (R)-1k (37.1 mg, 0.1 mmol) was oxygenated under condition B of section 2, and (R)-2k (36.2 mg, 0.093 mmol) was isolated as described in the General method (93% yield).

white solid;  $^1\text{H}$  NMR (400 MHz,  $\text{CDCl}_3$ )  $\delta$ : 10.4 (brs, 1H), 7.80-7.87 (m, 1H), 7.66-7.73 (m, 1H), 7.57-7.64 (m, 2H), 4.26 (brs, 1H), 3.75-3.83 (m, 1H), 1.57-1.67 (m, 1H), 1.51-1.60 (m, 1H), 1.44 (s, 3H), 1.32-1.39 (m, 1H), 1.27 (s, 3H), 0.93-1.13 (m, 2H), 0.72-0.87 (m, 1H), 0.66 (d, 3H,  $J = 6.3$  Hz);  $^{13}\text{C}$  NMR (100 MHz,  $\text{CDCl}_3$ )  $\delta$ : 163.6, 135.9, 132.0, 131.5, 130.6, 125.6, 123.8, 122.1 (q,  $J = 285.6$  Hz), 90.6 (q,  $J = 32.0$  Hz), 74.5, 52.0, 43.1, 33.7, 31.0, 30.9, 27.2, 25.7, 21.9;  $^{19}\text{F}$  NMR (369 MHz,  $\text{CDCl}_3$ )  $\delta$ : -77.3; IR (KBr,  $\text{cm}^{-1}$ )  $\nu$ : 3366, 2974, 2928, 2866, 1726, 1191; LRMS (ESI):  $m/z$  410  $[\text{M}+\text{Na}]^+$ ; HRMS (ESI):  $m/z$  calcd for  $\text{C}_{19}\text{H}_{24}\text{F}_3\text{NO}_4\text{Na}$   $[\text{M}+\text{Na}]^+$  410.1550, Found 410.1551.

***N*-benzyloxy-3-(((*S*)-3,7-dimethyloct-6-en-1-yl)oxy)-3-trifluoromethyl-isoindolinone (S4I)**

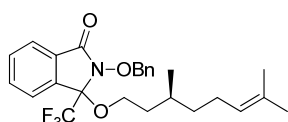

light yellow liquid (diastereomixture);  $^1\text{H}$  NMR (500 MHz,  $\text{CDCl}_3$ )  $\delta$ : 7.91 (d, 1H + 1H,  $J = 7.4$  Hz), 7.60-7.72 (m, 3H + 3H), 7.55-7.59 (m, 2H + 2H), 7.35-7.43 (m, 3H + 3H), 5.31-5.35 (m, 1H + 1H), 5.14-5.18 (m, 1H + 1H), 5.00-5.07 (m, 1H + 1H), 3.27-3.36 (m, 1H + 1H), 2.96-3.03 (m, 1H + 1H), 1.83-2.00 (m, 1H + 1H), 1.68 (s, 3H), 1.67 (s, 3H), 1.48-1.68 (m, 2H + 2H), 1.59 (s, 3H), 1.58 (s, 3H), 1.19-1.40 (m, 2H + 2H), 1.01-1.14 (m, 1H + 1H), 0.75-0.79 (m, 3H + 3H);  $^{13}\text{C}$  NMR (126 MHz,  $\text{CDCl}_3$ )  $\delta$ : 165.6, 165.5, 135.31, 135.26, 134.6, 133.4, 131.6, 131.2, 131.1, 130.04, 130.02, 129.30, 129.28, 128.8, 128.39, 128.37, 124.5, 124.1, 122.2 (q,  $J = 285.1$ ), 90.93 (q,  $J = 32.8$  Hz), 90.90 (q,  $J = 32.8$  Hz), 79.1, 77.2, 62.43, 62.40, 36.9, 36.7, 35.9, 35.8, 29.1, 29.0, 25.6, 25.2, 19.4, 19.2, 17.5;  $^{19}\text{F}$  NMR (369 MHz,  $\text{CDCl}_3$ )  $\delta$ : -78.0, -78.1; IR (neat,  $\text{cm}^{-1}$ )  $\nu$ : 2925, 1746, 1468, 1294, 1188; LRMS (ESI):  $m/z$  484  $[\text{M}+\text{Na}]^+$ ; HRMS (ESI):  $m/z$  calcd for  $\text{C}_{22}\text{H}_{26}\text{N}_2\text{O}_2\text{Na}$   $[\text{M}+\text{Na}]^+$  484.2070, Found 484.2062.

**3-(((*S*)-3,7-dimethyloctyl)oxy)-*N*-hydroxy-3-trifluoromethyl-isoindolinone (1I)**

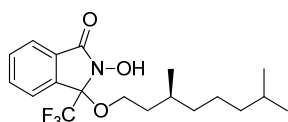

light yellow liquid (diastereomixture);  $^1\text{H}$  NMR (500 MHz,  $\text{CDCl}_3$ )  $\delta$ : 10.1 (brs, 1H + 1H), 7.80 (d, 1H + 1H,  $J = 7.5$  Hz), 7.65-7.70 (m, 1H + 1H), 7.58-7.63 (m, 2H + 2H), 3.47-3.55 (m, 1H + 1H), 2.98-3.06 (m, 1H + 1H), 1.61-1.75 (m, 1H + 1H), 1.53-1.61 (m, 1H + 1H), 1.37-1.53 (m, 2H + 2H), 1.15-1.33 (m, 3H + 3H), 1.00-1.15 (m, 3H + 3H), 0.78-0.86 (m, 9H + 9H);  $^{13}\text{C}$  NMR (126 MHz,  $\text{CDCl}_3$ )  $\delta$ : 165.93, 165.92, 135.3, 133.2, 131.5, 130.0, 124.0, 123.9, 121.9 (q,  $J = 286.3$  Hz), 91.1 (q,  $J = 33.2$  Hz), 62.8, 62.7, 39.2, 39.1, 37.3, 37.0, 36.1, 36.0, 29.61, 29.58, 27.9, 24.6, 24.5, 22.63, 22.61, 22.5, 19.5, 19.3;  $^{19}\text{F}$  NMR (369 MHz,  $\text{CDCl}_3$ )  $\delta$ : -78.5; IR (neat,  $\text{cm}^{-1}$ )  $\nu$ : 3154, 2954, 1718, 1469, 1306, 1201; LRMS (ESI):  $m/z$  396  $[\text{M}+\text{Na}]^+$ ; HRMS (ESI):  $m/z$  calcd for  $\text{C}_{19}\text{H}_{26}\text{F}_3\text{NO}_3\text{Na}$   $[\text{M}+\text{Na}]^+$  396.1757, Found 396.1768.

***N*-hydroxy-3-((3-hydroxy-3,7-dimethyloctyl)oxy)-3-trifluoromethyl-isoindolinone (2I)**

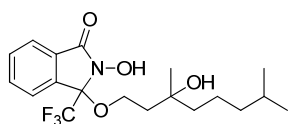

Starting material **II** (37.3 mg, 0.1 mmol) was oxygenated under condition B of section 2, and **2I** (21.5 mg, 0.055 mmol) was obtained as a diastereomixture according to the procedure as described in the General method (55% yield).

light yellow liquid (diastereomixture);  $^1\text{H}$  NMR (500 MHz,  $\text{CDCl}_3$ )  $\delta$ : 9.65-9.86 (brs, 1H + 1H), 7.83-7.88 (m, 1H + 1H), 7.58-7.68 (m, 3H + 3H), 3.52-3.60 (m, 1H + 1H), 3.42 (brs, 1H + 1H), 3.24-3.32 (m, 1H + 1H), 1.95-2.03 (m, 1H), 1.87-1.95 (m, 1H), 1.57-1.74 (m, 2H + 2H), 1.40-1.57 (m, 2H + 2H), 1.36 (s, 3H), 1.23-1.38 (m, 2H), 1.18 (s, 3H), 1.07-1.20 (m, 2H + 2H), 0.82-0.88 (m, 6H + 6H);  $^{13}\text{C}$  NMR (126 MHz,  $\text{CDCl}_3$ )  $\delta$ : 164.8, 134.44, 134.41, 133.0, 131.6, 130.4, 124.15, 124.13, 124.0, 121.8 (q,  $J = 284.9$  Hz), 90.9 (q,  $J = 34.0$  Hz), 72.7, 72.6, 60.7, 60.6, 43.4, 43.0, 39.28, 39.26, 39.1, 27.8, 27.2, 26.8, 22.54, 22.52, 22.5, 21.8, 21.6;  $^{19}\text{F}$  NMR (369 MHz,  $\text{CDCl}_3$ )  $\delta$ : -78.2; IR (neat,  $\text{cm}^{-1}$ )  $\nu$ : 3406, 3161, 2954, 1721, 1469, 1383, 1306, 1200; LRMS (ESI):  $m/z$  412  $[\text{M}+\text{Na}]^+$ ; HRMS (ESI):  $m/z$  calcd for  $\text{C}_{19}\text{H}_{26}\text{F}_3\text{NO}_4\text{Na}$   $[\text{M}+\text{Na}]^+$  412.1706, Found 412.1701.

#### ***N*-benzyloxy-3-((5-hydroxy-3-methylpentyl)oxy)-3-trifluoromethyl-isoindolinone (S4m)**

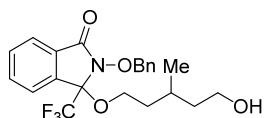

colorless liquid (diastereomixture);  $^1\text{H}$  NMR (500 MHz,  $\text{CDCl}_3$ )  $\delta$ : 7.90 (d, 1H + 1H,  $J = 6.9$  Hz), 7.59-7.72 (m, 3H + 3H), 7.53-7.58 (m, 2H + 2H), 7.35-7.43 (m, 3H + 3H), 5.30-5.35 (m, 1H), 5.10-5.14 (m, 1H), 3.49-3.65 (m, 2H), 3.25-3.33 (m, 1H + 1H), 2.94-3.03 (m, 1H + 1H), 1.63-1.73 (m, 1H + 1H), 1.45-1.60 (m, 2H + 2H), 1.24-1.43 (m, 2H + 2H), 0.76-0.80 (m, 3H + 3H);  $^{13}\text{C}$  NMR (100 MHz,  $\text{CDCl}_3$ )  $\delta$ : 165.7, 165.6, 135.25, 135.21, 134.535, 134.525, 133.52, 133.50, 131.7, 130.0, 129.5, 129.45, 129.37, 128.9, 128.8, 128.5, 128.4, 124.2, 124.1, 122.2 (q,  $J = 286.1$  Hz), 90.80 (q,  $J = 32.9$  Hz), 90.78 (q,  $J = 32.9$  Hz), 79.1, 62.3, 62.1, 60.714, 60.705, 39.41, 39.40, 26.5, 26.2, 19.42, 19.35;  $^{19}\text{F}$  NMR (369 MHz,  $\text{CDCl}_3$ )  $\delta$ : -78.2; IR (neat,  $\text{cm}^{-1}$ )  $\nu$ : 3417, 2929, 1742, 1468, 1295, 1189; LRMS (ESI):  $m/z$  446  $[\text{M}+\text{Na}]^+$ ; HRMS (ESI):  $m/z$  calcd for  $\text{C}_{22}\text{H}_{24}\text{F}_3\text{NO}_4\text{Na}$   $[\text{M}+\text{Na}]^+$  446.1550, Found 446.1536.

#### ***N*-hydroxy-3-((5-hydroxy-3-methylpentyl)oxy)-3-trifluoromethyl-isoindolinone (1m)**

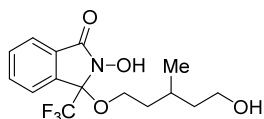

white solid (diastereomixture);  $^1\text{H}$  NMR (400 MHz,  $\text{acetone-}d_6$ )  $\delta$ : 7.70-7.88 (m, 4H + 4H), 3.51-3.66 (m, 2H + 2H), 3.37-3.47 (m, 1H + 1H), 3.05-3.19 (m, 1H + 1H), 1.80-1.91 (m, 1H), 1.69-1.80 (m, 1H), 1.40-1.68 (m, 3H + 3H), 1.18-1.31 (m, 1H + 1H), 0.82-0.87 (m, 3H + 3H);  $^{13}\text{C}$  NMR (100 MHz,  $\text{acetone-}d_6$ )  $\delta$ : 164.7, 135.8, 135.7, 134.1, 134.0, 132.6, 131.7, 131.6, 125.21, 125.19, 125.16, 125.14,

124.30, 124.25, 123.4 (q,  $J = 286.1$  Hz), 123.3 (q,  $J = 286.1$  Hz), 91.6 (q,  $J = 31.9$  Hz), 91.5 (q,  $J = 32.4$  Hz), 63.0, 62.6, 60.25, 60.19, 40.3, 39.9, 37.0, 36.9, 27.4, 26.5, 19.99, 19.98;  $^{19}\text{F}$  NMR (369 MHz, acetone- $d_6$ )  $\delta$ : -78.6, -78.8; IR (KBr,  $\text{cm}^{-1}$ )  $\nu$ : 3374, 2955, 2775, 1724, 1470, 1304, 1200; LRMS (ESI):  $m/z$  356  $[\text{M}+\text{Na}]^+$ ; HRMS (ESI):  $m/z$  calcd for  $\text{C}_{15}\text{H}_{18}\text{F}_3\text{NO}_4\text{Na}$   $[\text{M}+\text{Na}]^+$  356.1080, Found 356.1075.

### 3-((3,5-dihydroxy-3-methylpentyl)oxy)-*N*-hydroxy-3-trifluoromethyl-isoindolinone (2m)

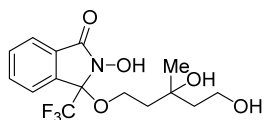

Starting material **1m** (100 mg, 0.3 mmol) was oxygenated under condition B of section 2, and **2m** (51.6 mg, 0.15 mmol) was obtained as a diastereomixture according to the procedure described in the General method (49% yield).

colorless liquid (diastereomixture);  $^1\text{H}$  NMR (500 MHz,  $\text{CDCl}_3$ )  $\delta$ : 9.73 (brs, 1H), 9.67 (brs, 1H), 7.88 (d, 1H,  $J = 7.4$  Hz), 7.58-7.69 (m, 3H + 3H), 3.84-4.03 (m, 2H + 2H), 3.50-3.60 (m, 1H + 1H), 3.25-3.33 (m, 1H + 1H), 2.02-2.10 (m, 1H), 1.88-2.01 (m, 1H + 1H), 1.76-1.83 (m, 1H), 1.64-1.76 (m, 2H + 2H), 1.44 (s, 3H), 1.61 (s, 3H);  $^{13}\text{C}$  NMR (126 MHz,  $\text{CDCl}_3$ )  $\delta$ : 164.9, 164.7, 134.4, 134.3, 133.1, 133.0, 131.67, 131.65, 130.4, 130.3, 124.1, 124.0, 121.9 (q,  $J = 286.7$  Hz), 90.9 (q,  $J = 32.4$  Hz), 90.8 (q,  $J = 32.4$  Hz), 73.09, 73.06, 59.34, 59.28, 42.3, 40.3, 39.7, 29.1, 27.3, 26.4;  $^{19}\text{F}$  NMR (369 MHz,  $\text{CDCl}_3$ )  $\delta$ : -78.2; IR (neat,  $\text{cm}^{-1}$ )  $\nu$ : 3391, 2930, 1720, 1469, 1191; LRMS (ESI):  $m/z$  372  $[\text{M}+\text{Na}]^+$ ; HRMS (ESI):  $m/z$  calcd for  $\text{C}_{15}\text{H}_{18}\text{F}_3\text{NO}_5\text{Na}$   $[\text{M}+\text{Na}]^+$  372.1029, Found 372.1021.

### *N*-benzyloxy-3-((5-(methoxymethoxy)-3-methylpentyl)oxy)-3-trifluoromethyl-isoindolinone (S4n)

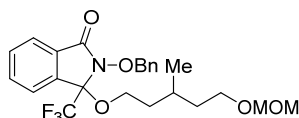

colorless liquid (diastereomixture);  $^1\text{H}$  NMR (500 MHz,  $\text{CDCl}_3$ )  $\delta$ : 7.89 (d, 1H + 1H,  $J = 6.9$  Hz), 7.59-7.71 (m, 3H + 3H), 7.53-7.57 (m, 2H + 2H), 7.33-7.43 (m, 3H + 3H), 5.29-5.33 (m, 1H + 1H), 5.11-5.15 (m, 1H + 1H), 4.56 (s, 2H), 4.55 (s, 2H), 3.42-3.53 (m, 2H + 2H), 3.32 (s, 3H), 3.31 (s, 3H), 3.27-3.35 (m, 1H + 1H), 2.94-3.02 (m, 1H + 1H), 1.47-1.76 (m, 3H + 3H), 1.28-1.42 (m, 2H + 2H), 0.77-0.80 (m, 3H + 3H);  $^{13}\text{C}$  NMR (126 MHz,  $\text{CDCl}_3$ )  $\delta$ : 165.6, 165.5, 135.3, 135.2, 134.58, 134.56, 133.44, 133.42, 131.6, 130.03, 130.01, 129.33, 129.30, 128.79, 128.77, 128.40, 128.38, 124.2, 124.1, 122.2 (q,  $J = 285.1$  Hz), 122.1 (q,  $J = 286.7$  Hz), 96.3, 90.9 (q,  $J = 32.8$  Hz), 90.8 (q,  $J = 33.2$  Hz), 79.1, 65.6, 65.5, 62.2, 55.0, 36.6, 36.4, 35.9, 35.8, 26.71, 26.68, 19.3, 19.2;  $^{19}\text{F}$  NMR (369 MHz,  $\text{CDCl}_3$ )  $\delta$ : -78.08, -78.14; IR (neat,  $\text{cm}^{-1}$ )  $\nu$ : 2931, 1745, 1468, 1294, 1189; LRMS (ESI):  $m/z$  490  $[\text{M}+\text{Na}]^+$ ; HRMS (ESI):  $m/z$  calcd for  $\text{C}_{24}\text{H}_{28}\text{F}_3\text{NO}_5\text{Na}$   $[\text{M}+\text{Na}]^+$  490.1812, Found 490.1799.

### *N*-hydroxy-3-((5-(methoxymethoxy)-3-methylpentyl)oxy)-3-trifluoromethyl-isoindolinone (1n)



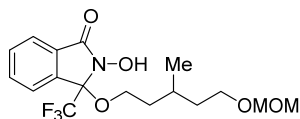

colorless liquid (diastereomixture);  $^1\text{H}$  NMR (400 MHz,  $\text{CDCl}_3$ )  $\delta$ : 9.61 (brs, 1H), 9.36 (brs, 1H), 7.80-7.86 (m, 1H + 1H), 7.56-7.68 (m 3H + 3H), 4.63 (s, 2H), 4.59 (s, 2H), 3.48-3.60 (m, 2H + 2H), 3.35-3.47 (m, 1H + 1H), 3.37 (s, 3H), 3.34 (s, 3H), 3.01-3.15 (m, 1H + 1H), 1.22-1.92 (m, 5H + 5H), 0.84-0.88 (m, 3H + 3H);  $^{13}\text{C}$  NMR (126 MHz,  $\text{CDCl}_3$ )  $\delta$ : 165.5, 165.4, 135.1, 135.0, 133.13, 133.06, 131.5, 130.2, 130.1, 124.1, 124.0, 123.9, 121.92 (q,  $J = 286.7$  Hz), 121.89 (q,  $J = 286.7$  Hz), 96.3, 96.2, 91.0 (q,  $J = 32.8$  Hz), 90.9 (q,  $J = 33.2$  Hz), 65.8, 65.5, 62.6, 61.9, 55.3, 55.1, 36.3, 36.0, 35.9, 35.8, 27.0, 25.9, 19.6, 19.5;  $^{19}\text{F}$  NMR (369 MHz,  $\text{CDCl}_3$ )  $\delta$ : -78.2, -78.5; IR (neat,  $\text{cm}^{-1}$ )  $\nu$ : 3172, 2934, 1720, 1469, 1305, 1198; LRMS (ESI):  $m/z$  400  $[\text{M}+\text{Na}]^+$ ; HRMS (ESI):  $m/z$  calcd for  $\text{C}_{17}\text{H}_{22}\text{F}_3\text{NO}_5\text{Na}$   $[\text{M}+\text{Na}]^+$  400.1342, Found 400.1331.

***N*-hydroxy-3-((3-hydroxy-5-(methoxymethoxy)-3-methylpentyl)oxy)-3-trifluoromethyl-isoindoline (2n)**

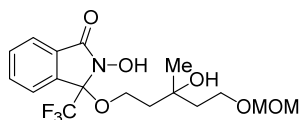

Starting material **1n** (37.7 mg, 0.1 mmol) was oxygenated under condition B of section 2, and **2n** (25.1 mg, 0.064 mmol) was obtained as a diastereomixture according to the purification procedure described in the General method (64% yield).

colorless liquid (diastereomixture);  $^1\text{H}$  NMR (400 MHz,  $\text{CDCl}_3$ )  $\delta$ : 9.43 (brs, 1H + 1H), 7.85-7.90 (m, 1H + 1H), 7.56-7.67 (m, 3H + 3H), 4.61 (s, 2H), 4.58-4.60 (m, 2H), 4.44 (brs, 1H), 4.06 (brs, 1H), 3.66-3.87 (m, 2H + 2H), 3.43-3.60 (m, 1H + 1H), 3.38 (s, 3H), 3.34 (s, 3H), 3.24-3.40 (m, 1H + 1H), 1.56-2.13 (m, 4H + 4H), 1.46 (s, 3H), 1.19 (s, 3H);  $^{13}\text{C}$  NMR (100 MHz,  $\text{CDCl}_3$ )  $\delta$ : 164.0, 163.8, 134.4, 134.2, 132.8, 132.7, 131.6, 131.5, 130.8, 130.7, 124.12, 124.08, 124.0, 122.0 (q,  $J = 286.6$  Hz), 121.9 (q,  $J = 286.6$  Hz), 96.49, 96.47, 90.8 (q,  $J = 32.9$  Hz), 90.6 (q,  $J = 32.9$  Hz), 72.5, 72.4, 64.4, 60.2, 60.1, 55.7, 55.6, 41.1, 40.5, 39.8, 39.4, 27.4, 26.5;  $^{19}\text{F}$  NMR (369 MHz,  $\text{CDCl}_3$ )  $\delta$ : -78.1, -78.2; IR (neat,  $\text{cm}^{-1}$ )  $\nu$ : 3423, 2937, 1721, 1469, 1191; LRMS (ESI):  $m/z$  416  $[\text{M}+\text{Na}]^+$ ; HRMS (ESI):  $m/z$  calcd for  $\text{C}_{17}\text{H}_{22}\text{F}_3\text{NO}_6\text{Na}$   $[\text{M}+\text{Na}]^+$  416.1291, Found 416.1301.

***N*-(4-methoxybenzyl)oxy-3-((3-methyl-5-(pent-4-yn-1-yloxy)pentyl)oxy)-3-trifluoromethyl-isoindoline (S4'o)**

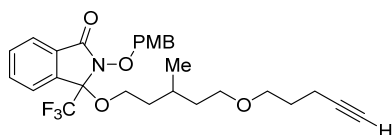

colorless liquid (diastereomixture);  $^1\text{H}$  NMR (500 MHz,  $\text{CDCl}_3$ )  $\delta$ : 7.88 (d, 1H + 1H,  $J = 7.4$  Hz), 7.58-7.70 (m, 3H + 3H), 7.45-7.50 (m, 2H + 2H), 6.91 (d, 2H + 2H,  $J = 8.6$  Hz), 5.24 (d, 1H + 1H,  $J = 9.7$  Hz), 5.03-5.08 (m, 1H + 1H), 3.81 (s, 3H + 3H), 3.26-3.46 (m, 5H + 5H), 2.93-3.01 (m, 1H + 1H),

2.21-2.26 (m, 2H + 2H), 1.93 (t, 1H + 1H,  $J = 2.6$  Hz), 1.69-1.77 (m, 2H + 2H), 1.44-1.69 (m, 3H + 3H), 1.26-1.42 (m, 2H + 2H), 0.78 (d, 3H,  $J = 6.9$  Hz), 0.76 (d, 3H,  $J = 6.9$  Hz);  $^{13}\text{C}$  NMR (126 MHz,  $\text{CDCl}_3$ )  $\delta$ : 165.5, 165.4, 160.1, 135.30, 135.25, 133.37, 133.35, 131.6, 131.12, 131.10, 130.1, 126.8, 124.2, 124.11, 124.07, 122.2 (q,  $J = 286.3$  Hz), 113.8, 90.9 (q,  $J = 32.8$  Hz), 90.8 (q,  $J = 32.8$  Hz), 83.92, 83.91, 78.8, 69.0, 68.9, 68.8, 68.7, 68.35, 68.33, 62.29, 62.27, 55.2, 36.5, 36.3, 36.0, 35.9, 28.5, 26.83, 26.80, 19.4, 19.3, 15.1;  $^{19}\text{F}$  NMR (369 MHz,  $\text{CDCl}_3$ )  $\delta$ : -78.07, -78.13; IR (neat,  $\text{cm}^{-1}$ )  $\nu$ : 3301, 2953, 2870, 1743, 1613, 1516, 1468, 1253, 1188, 1113; LRMS (ESI):  $m/z$  542  $[\text{M}+\text{Na}]^+$ ; HRMS (ESI):  $m/z$  calcd for  $\text{C}_{28}\text{H}_{32}\text{F}_3\text{NO}_5\text{Na}$   $[\text{M}+\text{Na}]^+$  542.2125, Found 542.2121.

***N*-hydroxy-3-((3-methyl-5-(pent-4-yn-1-yloxy)pentyl)oxy)-3-trifluoromethyl-isoindolinone (1o)**

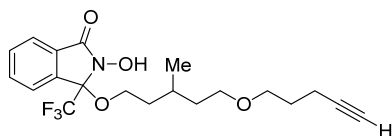

yellow liquid (diastereomixture);  $^1\text{H}$  NMR (500 MHz,  $\text{CDCl}_3$ )  $\delta$ : 9.46 (brs, 1H + 1H), 7.80-7.86 (m, 1H + 1H), 7.63-7.67 (m, 1H + 1H), 7.57-7.63 (m, 2H + 2H), 3.31-3.63 (m, 5H + 5H), 3.11-3.18 (m, 1H), 3.04-3.11 (m, 1H), 2.23-2.32 (m, 2H + 2H), 1.91-1.95 (m, 1H + 1H), 1.56-1.95 (m, 5H + 5H), 1.37-1.49 (m, 1H + 1H), 1.27-1.36 (m, 1H), 1.14-1.24 (m, 1H), 0.87 (d, 3H + 3H,  $J = 6.3$  Hz);  $^{13}\text{C}$  NMR (126 MHz,  $\text{CDCl}_3$ )  $\delta$ : 165.6, 165.4, 135.0, 134.9, 133.1, 133.0, 131.47, 131.45, 130.3, 130.1, 124.2, 124.1, 124.0, 123.9, 121.88 (q,  $J = 286.7$  Hz), 121.85 (q,  $J = 286.7$  Hz), 91.1 (q,  $J = 32.8$  Hz), 91.0 (q,  $J = 33.6$  Hz), 83.82, 83.75, 69.5, 69.2, 68.9, 68.6, 68.52, 68.46, 63.0, 61.7, 36.2, 36.1, 36.0, 35.4, 28.3, 28.0, 27.4, 25.4, 19.8, 19.7, 15.1, 15.0;  $^{19}\text{F}$  NMR (369 MHz,  $\text{CDCl}_3$ )  $\delta$ : -77.6, -78.0; IR (neat,  $\text{cm}^{-1}$ )  $\nu$ : 3302, 2932, 2874, 1718, 1469, 1303, 1198; LRMS (ESI):  $m/z$  422  $[\text{M}+\text{Na}]^+$ ; HRMS (ESI):  $m/z$  calcd for  $\text{C}_{20}\text{H}_{24}\text{F}_3\text{NO}_4\text{Na}$   $[\text{M}+\text{Na}]^+$  422.1550, Found 422.1564.

***N*-hydroxy-3-((3-hydroxy-3-methyl-5-(pent-4-yn-1-yloxy)pentyl)oxy)-3-trifluoromethyl-isoindolinone (2o)**

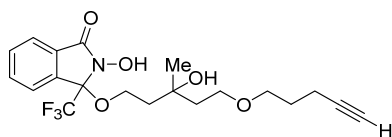

Starting material **1o** (32.0 mg, 0.08 mmol) was oxygenated under condition B of section 2, and **2o** (13.7 mg, 0.033 mmol) was obtained as a diastereomixture according to the purification procedure described in the General method (41% yield).

colorless liquid (diastereomixture);  $^1\text{H}$  NMR (500 MHz,  $\text{CDCl}_3$ )  $\delta$ : 9.46 (s, 1H), 9.39 (s, 1H), 7.86-7.92 (m, 1H + 1H), 7.57-7.67 (m, 3H + 3H), 4.65 (s, 1H), 4.31 (s, 1H), 3.25-3.76 (m, 6H + 6H), 2.22-2.29 (m, 2H + 2H), 2.02-2.13 (m, 1H), 1.96 (t, 1H,  $J = 2.3$  Hz), 1.86-1.96 (m, 1H + 1H), 1.67-1.82 (m, 3H + 4H), 1.55-1.65 (m, 1H + 1H), 1.47 (s, 3H), 1.17 (s, 3H);  $^{13}\text{C}$  NMR (126 MHz,  $\text{CDCl}_3$ )  $\delta$ : 163.7, 163.6, 134.3, 134.2, 132.7, 132.6, 131.54, 131.47, 130.9, 130.8, 124.11, 124.07, 124.0, 123.9, 122.0 (q,  $J = 286.6$  Hz), 121.9 (q,  $J = 286.6$  Hz), 90.5 (q,  $J = 32.9$  Hz), 83.4, 83.2, 72.8, 72.5, 70.0, 69.9, 69.0, 68.8, 67.9, 67.8, 60.1,

60.0, 41.2, 40.4, 39.8, 39.2, 28.1, 28.0, 27.6, 26.2, 15.21, 15.18;  $^{19}\text{F}$  NMR (369 MHz,  $\text{CDCl}_3$ )  $\delta$ : -78.1; IR (neat,  $\text{cm}^{-1}$ )  $\nu$ : 3404, 3304, 2936, 2118, 1723, 1469, 1377, 1303, 1198; LRMS (ESI):  $m/z$  438  $[\text{M}+\text{Na}]^+$ ; HRMS (ESI):  $m/z$  calcd for  $\text{C}_{20}\text{H}_{24}\text{F}_3\text{NO}_5\text{Na}$   $[\text{M}+\text{Na}]^+$  438.1499, Found 438.1499.

***N*-hydroxy-3-((3-hydroxy-3-methyloct-7-en-1-yl)oxy)-3-trifluoromethyl-isoindolinone (2p)**

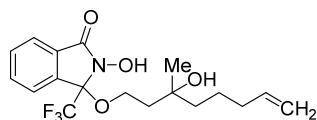

Starting material **1p** (14.3 mg, 0.04 mmol) was oxygenated under condition B of section 2, and **2p** (2.8 mg, 0.0075 mmol) was obtained as a diastereomixture according to the purification procedure described in the General method (19% yield).

colorless liquid (diastereomixture);  $^1\text{H}$  NMR (500 MHz,  $\text{CDCl}_3$ )  $\delta$ : 9.49 (brs, 1H), 9.43 (brs, 1H), 7.83-7.92 (m, 1H + 1H), 7.58-7.70 (m, 3H + 3H), 5.70-5.87 (m, 1H + 1H), 4.90-5.04 (m, 2H + 2H), 3.50-3.58 (m, 1H + 1H), 3.25-3.33 (m, 1H + 1H), 3.17 (brs, 1H + 1H), 1.86-2.10 (m, 3H + 3H), 1.58-1.72 (m, 2H + 2H), 1.35-1.55 (m, 3H + 3H), 1.36 (s, 3H), 1.19 (s, 3H);  $^{13}\text{C}$  NMR (100 MHz,  $\text{CDCl}_3$ )  $\delta$ : 164.6, 138.6, 138.4, 134.4, 134.3, 133.0, 131.64, 131.63, 130.4, 124.20, 124.18, 124.1, 121.9 (q,  $J = 286.1$  Hz), 121.8 (q,  $J = 286.1$  Hz), 114.8, 114.7, 90.89 (q,  $J = 33.4$  Hz), 90.86 (q,  $J = 33.4$  Hz), 72.8, 72.7, 60.6, 60.5, 42.6, 42.3, 39.3, 39.1, 34.0, 33.9, 27.3, 26.8, 23.4, 23.2;  $^{19}\text{F}$  NMR (369 MHz,  $\text{CDCl}_3$ )  $\delta$ : -78.2; IR (neat,  $\text{cm}^{-1}$ )  $\nu$ : 3377, 2937, 1719, 1469, 1303, 1190; LRMS (ESI):  $m/z$  396  $[\text{M}+\text{Na}]^+$ ; HRMS (ESI):  $m/z$  calcd for  $\text{C}_{18}\text{H}_{22}\text{F}_3\text{NO}_4\text{Na}$   $[\text{M}+\text{Na}]^+$  396.1393, Found 396.1388.

***N*-benzyloxy-3-((3-methyl-8-(4,4,5,5-tetramethyl-1,3,2-dioxaborolan-2-yl)octyl)oxy)-3-trifluoromethyl-isoindolinone (S4q)**

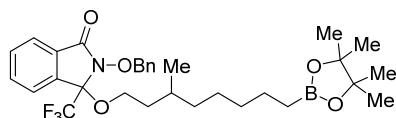

colorless liquid (diastereomixture);  $^1\text{H}$  NMR (400 MHz,  $\text{CDCl}_3$ )  $\delta$ : 7.89 (d, 1H + 1H,  $J = 7.2$  Hz), 7.57-7.72 (m, 2H + 2H), 7.55 (d, 1H + 1H,  $J = 6.7$  Hz), 5.25-5.33 (m, 1H + 1H), 5.13 (d, 1H,  $J = 9.4$  Hz), 3.23-3.35 (m, 1H + 1H), 2.91-3.01 (m, 1H + 1H), 1.42-1.65 (m, 2H + 2H), 1.22-1.41 (m, 4H + 4H), 1.23 (s, 12H + 12H), 1.10-1.22 (m, 4H + 4H), 0.91-1.08 (m, 1H + 1H), 0.69-0.78 (m, 5H + 5H);  $^{13}\text{C}$  NMR (100 MHz,  $\text{CDCl}_3$ )  $\delta$ : 165.6, 165.5, 135.32, 135.27, 134.6, 133.4, 131.6, 130.05, 130.03, 129.30, 129.27, 128.77, 128.76, 128.40, 128.38, 124.2, 124.1, 122.2 (q,  $J = 285.6$  Hz), 91.0 (q,  $J = 32.9$  Hz), 90.9 (q,  $J = 32.9$  Hz), 82.8, 79.10, 79.07, 62.48, 62.46, 53.4, 36.8, 36.5, 36.0, 35.9, 32.56, 32.55, 29.47, 29.46, 26.53, 26.51, 24.7, 23.9, 19.4, 19.2;  $^{11}\text{B}$  NMR (126 MHz,  $\text{CDCl}_3$ )  $\delta$ : 36.1;  $^{19}\text{F}$  NMR (369 MHz,  $\text{CDCl}_3$ )  $\delta$ : -78.0, -78.1; IR (neat,  $\text{cm}^{-1}$ )  $\nu$ : 2927, 1747, 1468, 1378, 1195; LRMS (ESI):  $m/z$  598  $[\text{M}+\text{Na}]^+$ ; HRMS (ESI):  $m/z$  calcd for  $\text{C}_{31}\text{H}_{41}\text{BF}_3\text{NO}_5\text{Na}$   $[\text{M}+\text{Na}]^+$  598.2922, Found 598.2937.

***N*-hydroxy-3-((3-methyl-8-(4,4,5,5-tetramethyl-1,3,2-dioxaborolan-2-yl)octyl)oxy)-3-trifluoromethyl-isoindolinone (1q)**

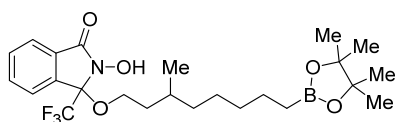

colorless liquid (diastereomixture);  $^1\text{H}$  NMR (400 MHz,  $\text{CDCl}_3$ )  $\delta$ : 9.70 (s, 1H), 9.69 (s, 1H), 7.75-7.82 (m, 1H + 1H), 7.55-7.68 (m, 3H + 3H), 3.39-3.50 (m, 1H + 1H), 2.91-3.03 (m, 1H + 1H), 1.47-1.69 (m, 2H + 2H), 1.33-1.47 (m, 3H + 3H), 1.17-1.30 (m, 5H + 5H), 1.23 (s, 12H + 12H), 1.05-1.10 (m, 1H + 1H), 0.70-0.83 (m, 5H + 5H);  $^{13}\text{C}$  NMR (100 MHz,  $\text{CDCl}_3$ )  $\delta$ : 165.8, 135.33, 135.32, 133.2, 131.4, 130.04, 130.01, 123.94, 123.85, 121.9 (q,  $J = 285.6$  Hz), 90.92 (q,  $J = 32.6$  Hz), 90.91 (q,  $J = 32.6$  Hz), 82.93, 82.90, 62.7, 62.6, 36.51, 36.47, 36.1, 36.0, 32.5, 32.3, 29.6, 29.3, 26.5, 26.4, 24.72, 24.69, 23.9, 23.7, 19.5, 19.3;  $^{11}\text{B}$  NMR (126 MHz,  $\text{CDCl}_3$ )  $\delta$ : 36.3;  $^{19}\text{F}$  NMR (369 MHz,  $\text{CDCl}_3$ )  $\delta$ : -78.5; IR (neat,  $\text{cm}^{-1}$ )  $\nu$ : 3423, 2927, 1720, 1469, 1378, 1315, 1200; LRMS (ESI):  $m/z$  508  $[\text{M}+\text{Na}]^+$ ; HRMS (ESI):  $m/z$  calcd for  $\text{C}_{24}\text{H}_{35}\text{BF}_3\text{NO}_5\text{Na}$   $[\text{M}+\text{Na}]^+$  508.2453, Found 508.2443.

***N*-hydroxy-3-((3-hydroxy-3-methyl-8-(4,4,5,5-tetramethyl-1,3,2-dioxaborolan-2-yl)octyl)oxy)-3-trifluoromethylisoindolinone (2q)**

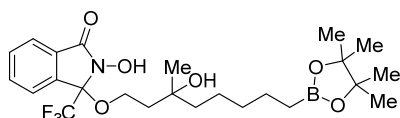

Starting material **1q** (38.8 mg, 0.08 mmol) was oxygenated under condition B of section 2, and **2q** (18.2 mg, 0.036 mmol) was obtained as a diastereomixture according to the purification procedure described in the General method (45% yield).

colorless liquid (diastereomixture);  $^1\text{H}$  NMR (400 MHz,  $\text{CDCl}_3$ )  $\delta$ : 9.45 (brs, 1H), 9.40 (brs, 1H), 7.84-7.90 (m, 1H + 1H), 7.58-7.69 (m, 3H + 3H), 3.46-3.57 (m, 1H + 1H), 3.23-3.33 (m, 1H + 1H), 3.03 (brs, 1H), 2.94 (brs, 1H), 1.84-2.02 (m, 2H + 2H), 1.56-1.70 (m, 2H + 2H), 1.22-1.52 (m, 6H + 6H), 1.33 (s, 3H), 1.24 (s, 12H), 1.23 (s, 12H), 1.16 (s, 3H), 0.71-0.80 (m, 2H + 2H);  $^{13}\text{C}$  NMR (126 MHz,  $\text{CDCl}_3$ )  $\delta$ : 164.53, 164.48, 134.43, 134.41, 132.9, 131.6, 130.5, 124.2, 124.1, 124.0, 121.90 (q,  $J = 286.7$  Hz), 121.86 (q,  $J = 286.7$  Hz), 90.9 (q,  $J = 32.4$  Hz), 90.8 (q,  $J = 33.6$  Hz), 82.92, 82.90, 72.9, 72.7, 60.62, 60.59, 43.0, 42.8, 39.3, 39.2, 32.64, 32.59, 29.2, 27.3, 26.7, 24.8, 24.7, 23.8, 23.72, 23.70, 23.5;  $^{11}\text{B}$  NMR (126 MHz,  $\text{CDCl}_3$ )  $\delta$ : 35.8;  $^{19}\text{F}$  NMR (369 MHz,  $\text{CDCl}_3$ )  $\delta$ : -78.1; IR (neat,  $\text{cm}^{-1}$ )  $\nu$ : 3423, 2933, 1723, 1469, 1374, 1315, 1199; LRMS (ESI):  $m/z$  524  $[\text{M}+\text{Na}]^+$ ; HRMS (ESI):  $m/z$  calcd for  $\text{C}_{24}\text{H}_{35}\text{BF}_3\text{NO}_6\text{Na}$   $[\text{M}+\text{Na}]^+$  524.2402, Found 524.2407.

**2-((2R)-1-((*N*-(benzyloxy)-3-oxo-1-(trifluoromethyl)isoindolin-1-yl)oxy)-3-methylbutan-2-yl)isoindolin-1,3-dione (S4r)**

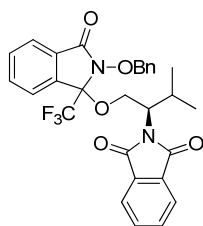

colorless sticky liquid (diastereomixture);  $^1\text{H}$  NMR (400 MHz,  $\text{CDCl}_3$ )  $\delta$ : 7.85-7.93 (m, 2H + 2H), 7.62-7.80 (m, 5H + 5H), 7.53-7.62 (m, 2H + 2H), 7.27-7.46 (m, 4H + 4H), 5.30 (d, 1H,  $J = 10.1$  Hz), 5.14 (d, 1H,  $J = 10.1$  Hz), 5.10 (d, 1H,  $J = 9.9$  Hz), 4.96 (d, 1H,  $J = 9.9$  Hz), 4.00-4.15 (m, 1H + 1H), 3.90-3.96 (m, 1H), 3.60-3.66 (m, 1H), 3.52-3.57 (m, 1H), 3.33-3.38 (m, 1H), 2.22-2.34 (m, 1H), 2.12-2.22 (m, 1H), 0.75-0.86 (m, 6H);  $^{13}\text{C}$  NMR (126 MHz,  $\text{CDCl}_3$ )  $\delta$ : 168.39, 168.37, 165.5, 165.0, 134.51, 134.49, 134.3, 134.2, 134.0, 133.8, 133.52, 133.50, 131.9, 131.8, 131.5, 131.4, 129.9, 129.7, 129.2, 129.1, 128.8, 128.5, 128.4, 128.2, 124.4, 124.3, 124.2, 124.1, 123.1, 123.0, 121.8 (q,  $J = 286.3$  Hz), 90.8 (q,  $J = 33.2$  Hz), 90.7 (q,  $J = 33.2$  Hz), 79.1, 79.0, 62.5, 61.8, 57.2, 56.7, 27.8, 27.4, 20.0, 19.9, 19.7, 19.6;  $^{19}\text{F}$  NMR (369 MHz,  $\text{CDCl}_3$ )  $\delta$ : -78.0, -78.3; IR (neat,  $\text{cm}^{-1}$ )  $\nu$ : 1747, 1711, 1647, 1468, 1389, 1189; LRMS (ESI):  $m/z$  561  $[\text{M}+\text{Na}]^+$ ; HRMS (ESI):  $m/z$  calcd for  $\text{C}_{29}\text{H}_{25}\text{F}_3\text{N}_2\text{O}_5\text{Na}$   $[\text{M}+\text{Na}]^+$  561.1608, Found 561.1583.

**2-((2R)-1-((2-hydroxy-3-oxo-1-(trifluoromethyl)isoindolin-1-yl)oxy)-3-methylbutan-2-yl)isoindoline-1,3-dione (1r)**

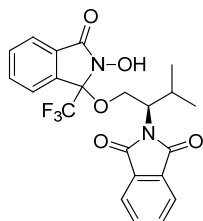

white solid (diastereomixture);  $^1\text{H}$  NMR (500 MHz,  $\text{CDCl}_3$ )  $\delta$ : 9.04 (brs, 1H), 8.09 (brs, 1H), 7.82-7.89 (m, 3H + 3H), 7.72-7.79 (m, 2H + 2H), 7.57-7.72 (m, 2H + 2H), 7.52-7.57 (m, 1H), 7.30 (d, 1H,  $J = 7.5$  Hz), 4.14-4.25 (m, 1H + 1H), 4.08 (dd, 1H,  $J = 9.4$  Hz, 9.4 Hz), 3.73-3.77 (m, 1H + 1H), 3.35-3.39 (m, 1H), 2.16-2.33 (m, 1H + 1H), 0.80-0.95 (m, 6H + 6H);  $^{13}\text{C}$  NMR (126 MHz,  $\text{CDCl}_3$ )  $\delta$ : 169.2, 168.7, 165.4, 165.0, 134.4, 134.3, 134.14, 134.07, 133.3, 133.2, 131.8, 131.7, 131.5, 130.0, 129.9, 124.2, 124.1, 124.0, 123.29, 123.26, 121.5 (q,  $J = 286.3$  Hz), 90.8 (q,  $J = 33.0$  Hz), 90.7 (q,  $J = 33.6$  Hz), 62.3, 61.9, 57.1, 57.0, 28.0, 27.7, 20.0, 19.9, 19.7;  $^{19}\text{F}$  NMR (369 MHz,  $\text{CDCl}_3$ )  $\delta$ : -78.3, -78.4; IR (KBr,  $\text{cm}^{-1}$ )  $\nu$ : 3219, 2968, 1713, 1469, 1390, 1200; LRMS (ESI):  $m/z$  471  $[\text{M}+\text{Na}]^+$ ; HRMS (ESI):  $m/z$  calcd for  $\text{C}_{22}\text{H}_{19}\text{F}_3\text{N}_2\text{O}_5\text{Na}$   $[\text{M}+\text{Na}]^+$  471.1138, Found 471.1120.

**2-((2S)-3-hydroxy-1-((N-hydroxy-3-oxo-1-(trifluoromethyl)isoindolin-1-yl)oxy)-3-methylbutan-2-yl)isoindoline-1,3-dione (2r)**

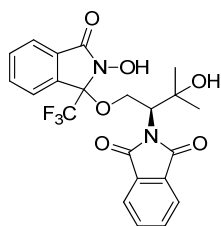

Starting material **1r** (89.7 mg, 0.2 mmol) was oxygenated under condition B of section 2, and **2r** (37.5 mg, 0.081 mmol) was obtained as a diastereomixture according to the purification procedure described in the General method (40% yield).

white solid (diastereomixture);  $^1\text{H NMR}$  (500 MHz,  $\text{CDCl}_3$ ; underlined chemical shifts for one isomer)  $\delta$ : 9.05 (brs, 1H), 9.05 (brs, 1H), 7.90-7.95 (m, 2H), 7.83-7.88 (m, 1H), 7.83-7.88 (m, 3H), 7.76-7.80 (m, 2H), 7.76-7.80 (m, 2H), 7.61-7.69 (m, 3H), 7.52-7.61 (m, 2H), 7.37 (d, 1H,  $J = 7.5$  Hz), 4.66 (brs, 1H), 4.59 (dd, 1H,  $J = 7.5$  Hz, 7.5 Hz), 4.40 (dd, 1H,  $J = 3.7$  Hz, 8.5 Hz), 4.28 (brs, 1H), 3.94 (dd, 1H,  $J = 7.5$  Hz, 9.5 Hz), 3.91 (dd, 1H,  $J = 8.5$  Hz, 10.7 Hz), 3.53 (dd, 1H,  $J = 3.7$  Hz, 10.7 Hz), 3.45 (dd, 1H,  $J = 7.5$  Hz, 9.5 Hz), 1.55 (s, 3H), 1.25 (s, 3H), 1.18 (s, 3H), 1.16 (s, 3H);  $^{13}\text{C NMR}$  (126 MHz,  $\text{CDCl}_3$ )  $\delta$ : 164.6, 164.0, 134.8, 134.5, 134.2, 133.7, 133.2, 133.0, 131.9, 131.8, 131.5, 131.2, 130.5, 130.1, 124.4, 124.1, 123.9, 123.8, 121.7 (q,  $J = 287.1$  Hz), 121.5 (q,  $J = 286.7$  Hz), 90.8 (q,  $J = 33.6$  Hz), 90.7 (q,  $J = 33.2$  Hz), 72.0, 71.5, 60.8, 60.4, 59.6, 58.1, 28.4, 27.98, 27.96, 27.6;  $^{19}\text{F NMR}$  (369 MHz,  $\text{CDCl}_3$ )  $\delta$ : -77.8, -78.3; IR (KBr,  $\text{cm}^{-1}$ )  $\nu$ : 3449, 2979, 1704, 1396, 1199; LRMS (ESI):  $m/z$  487  $[\text{M}+\text{Na}]^+$ ; HRMS (ESI):  $m/z$  calcd for  $\text{C}_{22}\text{H}_{19}\text{F}_3\text{N}_2\text{O}_6\text{Na}$   $[\text{M}+\text{Na}]^+$  487.1087, Found 487.1083.

#### ***N*-benzyloxy-3-(3-phenylpropoxy)-3-trifluoromethyl-isoindolinone (S4s)**

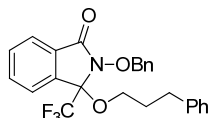

light yellow liquid;  $^1\text{H NMR}$  (500 MHz,  $\text{CDCl}_3$ )  $\delta$ : 7.89 (dd, 1H,  $J = 6.9$  Hz, 1.2 Hz), 7.62-7.68 (m, 2H), 7.56-7.59 (m, 3H), 7.36-7.44 (m, 3H), 7.19-7.25 (m, 2H), 7.13-7.18 (m, 1H), 7.09-7.12 (m, 2H), 5.31 (d,  $J = 9.8$  Hz), 5.14 (d,  $J = 9.8$  Hz), 3.29 (dt,  $J = 9.2$  Hz, 5.8 Hz), 2.96 (dt,  $J = 9.2$  Hz, 5.8 Hz), 2.60-2.71 (m, 2H), 1.78-1.92 (m, 2H);  $^{13}\text{C NMR}$  (126 MHz,  $\text{CDCl}_3$ )  $\delta$ : 165.6, 141.1, 135.2, 134.6, 133.4, 131.6, 130.0, 129.4, 128.9, 128.5, 128.4, 128.3, 125.9, 124.2, 124.1, 122.2 (q,  $J = 285.5$  Hz), 90.9 (q,  $J = 33.6$  Hz), 79.1, 63.1, 31.8, 30.5;  $^{19}\text{F NMR}$  (369 MHz,  $\text{CDCl}_3$ )  $\delta$ : -78.0; IR (neat,  $\text{cm}^{-1}$ )  $\nu$ : 2950, 1744, 1468, 1190; LRMS (ESI):  $m/z$  464  $[\text{M}+\text{Na}]^+$ ; HRMS (ESI):  $m/z$  calcd for  $\text{C}_{25}\text{H}_{22}\text{F}_3\text{NO}_3\text{Na}$   $[\text{M}+\text{Na}]^+$  464.1444, Found 464.1450.

#### ***N*-hydroxy-3-(3-phenylpropoxy)-3-trifluoromethyl-isoindolinone (1s)**

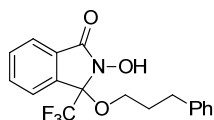

light yellow liquid;  $^1\text{H NMR}$  (500 MHz,  $\text{CDCl}_3$ )  $\delta$ : 10.12 (brs, 1H), 7.80 (d, 1H,  $J = 7.5$  Hz), 7.67 (dd, 1H,  $J = 7.5$  Hz, 7.5 Hz), 7.59-7.63 (m, 2H), 7.30 (dd, 2H,  $J = 7.5$  Hz, 7.5 Hz), 7.19-7.23 (m, 3H), 3.35 (dt, 1H,  $J$

= 8.6 Hz, 5.8 Hz), 2.95-3.05 (m, 1H), 2.67-2.77 (m, 2H), 1.90-1.98 (m, 2H);  $^{13}\text{C}$  NMR (126 MHz,  $\text{CDCl}_3$ )  $\delta$ : 165.9, 141.3, 135.0, 133.2, 131.5, 129.8, 128.4, 128.3, 125.8, 124.0, 123.8, 121.9 (q,  $J = 285.5$  Hz), 91.0 (q,  $J = 33.6$  Hz), 63.4, 31.3, 30.5;  $^{19}\text{F}$  NMR (369 MHz,  $\text{CDCl}_3$ )  $\delta$ : -78.3; IR (neat,  $\text{cm}^{-1}$ )  $\nu$ : 3144, 2948, 1717, 1469, 1305, 1200; LRMS (ESI):  $m/z$  374  $[\text{M}+\text{Na}]^+$ ; HRMS (ESI):  $m/z$  calcd for  $\text{C}_{18}\text{H}_{16}\text{F}_3\text{NO}_3\text{Na}$   $[\text{M}+\text{Na}]^+$  374.0975, Found 374.0990.

#### ***N*-hydroxy-3-(3-oxo-3-phenylpropoxy)-3-trifluoromethyl-isoindolinone (2s)**

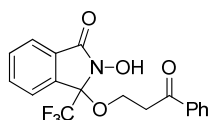

Starting material **1s** (35.1 mg, 0.1 mmol) was oxygenated under condition B of section 2, and **2s** (32.4 mg, 0.089 mmol) was isolated according to the purification procedure described in the General method (89% yield).

light yellow liquid;  $^1\text{H}$  NMR (500 MHz,  $\text{CDCl}_3$ )  $\delta$ : 8.91 (brs, 1H), 7.98 (d, 2H,  $J = 7.5$  Hz), 7.89 (d, 1H,  $J = 8.0$  Hz), 7.66-7.70 (m, 1H), 7.59-7.66 (m, 3H), 7.49 (dd, 2H,  $J = 7.5$  Hz), 3.77 (dt, 1H,  $J = 3.1$  Hz, 9.6 Hz), 3.54 (ddd, 1H,  $J = 18.3$  Hz, 9.6 Hz, 3.1 Hz), 3.43 (dt, 1H,  $J = 9.6$  Hz, 3.1 Hz), 3.16 (dt, 1H,  $J = 18.3$  Hz, 3.1 Hz);  $^{13}\text{C}$  NMR (100 MHz,  $\text{CDCl}_3$ )  $\delta$ : 198.8, 163.6, 135.9, 134.1, 133.9, 132.9, 131.7, 130.6, 128.8, 128.3, 124.2, 124.1, 121.8 (q,  $J = 286.6$  Hz), 90.5 (q,  $J = 32.9$  Hz), 57.9, 37.2, 29.2;  $^{19}\text{F}$  NMR (369 MHz,  $\text{CDCl}_3$ )  $\delta$ : -78.1; IR (neat,  $\text{cm}^{-1}$ )  $\nu$ : 3220, 2952, 1718, 1197; LRMS (ESI):  $m/z$  388  $[\text{M}+\text{Na}]^+$ ; HRMS (ESI):  $m/z$  calcd for  $\text{C}_{18}\text{H}_{14}\text{F}_3\text{NO}_4\text{Na}$   $[\text{M}+\text{Na}]^+$  388.0767, Found 388.0759.

#### **4-(3-((2-benzyloxy-3-oxo-1-(trifluoromethyl)isoindolin-1-yl)oxy)propyl)phenyl acetate (S4t)**

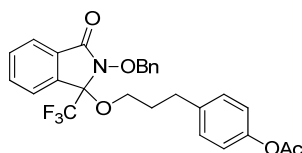

light yellow liquid;  $^1\text{H}$  NMR (500 MHz,  $\text{CDCl}_3$ )  $\delta$ : 7.88 (d, 1H,  $J = 7.4$  Hz), 7.60-7.70 (m, 2H), 7.54-7.58 (m, 3H), 7.34-7.44 (m, 3H), 7.09 (d, 2H,  $J = 8.6$  Hz), 6.92 (d, 2H,  $J = 8.6$  Hz), 5.32 (d, 1H,  $J = 9.7$  Hz), 5.14 (d, 1H,  $J = 9.7$  Hz), 3.27 (dt, 1H,  $J = 8.6$  Hz, 6.3 Hz), 2.92-2.98 (m, 1H), 2.64 (t, 2H,  $J = 7.7$  Hz), 2.28 (s, 3H), 1.76-1.89 (m, 2H);  $^{13}\text{C}$  NMR (126 MHz,  $\text{CDCl}_3$ )  $\delta$ : 169.5, 165.6, 148.8, 138.6, 135.1, 134.6, 133.5, 131.7, 129.9, 129.4, 129.3, 128.8, 128.4, 124.2, 124.1, 122.2 (q,  $J = 285.5$  Hz), 121.3, 90.9 (q,  $J = 33.2$  Hz), 79.1, 63.0, 31.1, 30.3, 21.0;  $^{19}\text{F}$  NMR (369 MHz,  $\text{CDCl}_3$ )  $\delta$ : -78.0; IR (neat,  $\text{cm}^{-1}$ )  $\nu$ : 2949, 1747, 1194; LRMS (ESI):  $m/z$  522  $[\text{M}+\text{Na}]^+$ ; HRMS (ESI):  $m/z$  calcd for  $\text{C}_{27}\text{H}_{24}\text{F}_3\text{NO}_5\text{Na}$   $[\text{M}+\text{Na}]^+$  522.1499, Found 522.1492.

#### **4-(3-((2-hydroxy-3-oxo-1-(trifluoromethyl)isoindolin-1-yl)oxy)propyl)phenyl acetate (1t)**

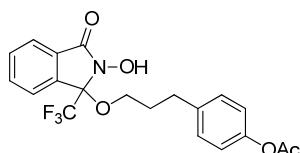

reddish sticky liquid;  $^1\text{H}$  NMR (500 MHz,  $\text{CDCl}_3$ )  $\delta$ : 9.78 (brs, 1H), 7.77 (d, 1H,  $J = 7.4$  Hz), 7.62-7.66 (m, 1H), 7.53-7.60 (m, 2H), 7.17 (d, 2H,  $J = 8.6$  Hz), 6.98 (d, 2H,  $J = 8.6$  Hz), 3.40-3.46 (m, 1H), 2.97-3.05 (m, 1H), 2.68-2.78 (m, 2H), 2.28 (s, 3H), 1.85-2.01 (m, 2H);  $^{13}\text{C}$  NMR (126 MHz,  $\text{CDCl}_3$ )  $\delta$ : 169.7, 165.8, 148.8, 138.9, 135.0, 133.3, 131.5, 129.9, 129.3, 124.0, 123.9, 121.9 (q,  $J = 286.7$  Hz), 121.3, 91.0 (q,  $J = 32.8$  Hz), 63.2, 31.2, 30.4, 21.0;  $^{19}\text{F}$  NMR (369 MHz,  $\text{CDCl}_3$ )  $\delta$ : -78.4; IR (neat,  $\text{cm}^{-1}$ )  $\nu$ : 3425, 1719, 1645, 1196; LRMS (ESI):  $m/z$  432  $[\text{M}+\text{Na}]^+$ ; HRMS (ESI):  $m/z$  calcd for  $\text{C}_{20}\text{H}_{18}\text{F}_3\text{NO}_5\text{Na}$   $[\text{M}+\text{Na}]^+$  432.1029, Found 432.1011.

#### 4-(3-((2-hydroxy-3-oxo-1-(trifluoromethyl)isoindolin-1-yl)oxy)propanoyl)phenyl acetate (2t)

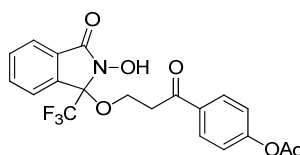

Starting material **1t** (53.8 mg, 0.13 mmol) was oxygenated under condition A of section 2, and **2t** (30.0 mg, 0.071 mmol) was isolated according to the purification procedure described in the General method (54% yield).

white solid;  $^1\text{H}$  NMR (500 MHz,  $\text{CDCl}_3$ )  $\delta$ : 8.97 (brs, 1H), 8.00 (dd, 2H,  $J = 8.6$  Hz, 1.1 Hz), 7.86 (d, 1H,  $J = 8.0$  Hz), 7.60-7.69 (m, 3H), 7.21 (dd, 2H,  $J = 8.6$  Hz, 1.1 Hz), 3.72-3.78 (m, 1H), 3.42-3.51 (m, 2H), 3.13-3.22 (m, 1H), 2.32 (s, 3H);  $^{13}\text{C}$  NMR (100 MHz,  $\text{CDCl}_3$ )  $\delta$ : 197.5, 168.7, 163.8, 155.0, 134.0, 133.6, 133.0, 131.7, 130.5, 130.0, 124.2, 124.1, 122.0, 121.7 (q,  $J = 286.6$  Hz), 90.5 (q,  $J = 33.2$  Hz), 58.0, 37.3, 21.1;  $^{19}\text{F}$  NMR (369 MHz,  $\text{CDCl}_3$ )  $\delta$ : -78.1; IR (neat,  $\text{cm}^{-1}$ )  $\nu$ : 3243, 1719, 1195; LRMS (ESI):  $m/z$  446  $[\text{M}+\text{Na}]^+$ ; HRMS (ESI):  $m/z$  calcd for  $\text{C}_{20}\text{H}_{16}\text{F}_3\text{NO}_6\text{Na}$   $[\text{M}+\text{Na}]^+$  446.0822, Found 446.0825.

#### *N*-benzyloxy-3-(3-(4-methoxyphenyl)propoxy)-3-trifluoromethyl-isoindolinone (S4u)

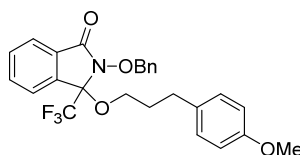

colorless liquid;  $^1\text{H}$  NMR (500 MHz,  $\text{CDCl}_3$ )  $\delta$ : 7.89 (dd, 1H,  $J = 6.3$  Hz, 1.1 Hz), 7.60-7.69 (m, 2H), 7.55-7.60 (m, 3H), 7.35-7.44 (m, 3H), 7.00-7.04 (m, 2H), 6.72-6.67 (m, 2H), 5.31 (d, 1H,  $J = 9.7$  Hz), 5.13 (d, 1H,  $J = 9.7$  Hz), 3.75 (s, 3H), 3.25-3.32 (m, 1H), 2.92-2.99 (m, 1H), 2.53-2.65 (m, 2H), 1.76-1.89 (m, 2H);  $^{13}\text{C}$  NMR (126 MHz,  $\text{CDCl}_3$ )  $\delta$ : 165.5, 157.8, 135.2, 134.6, 133.4, 133.1, 131.6, 130.0, 129.4, 129.2, 128.8, 128.4, 124.2, 124.1, 122.2 (q,  $J = 285.9$  Hz), 113.7, 90.9 (q,  $J = 32.8$  Hz), 79.1, 63.0, 55.1, 30.8, 30.7;  $^{19}\text{F}$  NMR (369 MHz,  $\text{CDCl}_3$ )  $\delta$ : -78.0; IR (neat,  $\text{cm}^{-1}$ )  $\nu$ : 2952, 1745, 1613, 1513, 1468, 1188; LRMS



(ESI):  $m/z$  494  $[M+Na]^+$ ; HRMS (ESI):  $m/z$  calcd for  $C_{26}H_{24}F_3NO_4Na$   $[M+Na]^+$  494.1550, Found 494.1547.

***N*-hydroxy-3-(3-(4-methoxyphenyl)propoxy)-3-trifluoromethyl-isoindolinone (1u)**

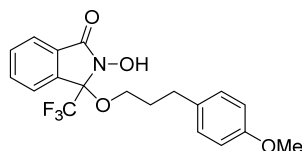

colorless liquid;  $^1H$  NMR (400 MHz,  $CDCl_3$ )  $\delta$ : 9.70 (brs, 1H), 7.74-7.79 (m, 1H), 7.55-7.67 (m, 3H), 7.05-7.12 (m, 2H), 6.78-6.85 (m, 2H), 3.78 (s, 3H), 3.40-3.47 (m, 1H), 2.97-3.05 (m, 1H), 2.60-2.74 (m, 2H), 1.83-2.01 (m, 2H);  $^{13}C$  NMR (126 MHz,  $CDCl_3$ )  $\delta$ : 165.8, 157.8, 135.1, 133.4, 133.2, 131.5, 129.9, 129.3, 124.1, 123.9, 121.9 (q,  $J = 286.7$  Hz), 113.8, 91.0 (q,  $J = 32.8$  Hz), 63.4, 55.2, 30.9, 30.8;  $^{19}F$  NMR (369 MHz,  $CDCl_3$ )  $\delta$ : -78.4; IR (neat,  $cm^{-1}$ )  $\nu$ : 3422, 3173, 2951, 1717, 1613, 1513, 1301, 1191; LRMS (ESI):  $m/z$  404  $[M+Na]^+$ ; HRMS (ESI):  $m/z$  calcd for  $C_{19}H_{18}F_3NO_4Na$   $[M+Na]^+$  404.1080, Found 404.1074.

***N*-hydroxy-3-(3-(4-methoxyphenyl)-3-oxopropoxy)-3-trifluoromethyl-isoindolinone (2u)**

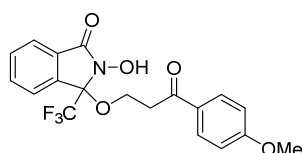

Starting material **1u** (38.1 mg, 0.1 mmol) was oxygenated under condition B of section 2, and **2u** (27.7 mg, 0.070 mmol) was isolated according to the purification procedure described in the General method (70% yield).

light yellow solid;  $^1H$  NMR (500 MHz,  $CDCl_3$ )  $\delta$ : 9.03 (brs, 1H), 7.95 (d, 2H,  $J = 8.8$  Hz), 7.90 (d, 1H,  $J = 6.9$  Hz), 7.61-7.69 (m, 3H), 6.94 (d, 2H,  $J = 8.8$  Hz), 3.87 (s, 3H), 3.74 (td, 1H,  $J = 9.7$  Hz, 2.3 Hz), 3.43-3.52 (m, 1H), 3.37-3.43 (m, 1H), 3.04-3.11 (m, 1H);  $^{13}C$  NMR (126 MHz,  $CDCl_3$ )  $\delta$ : 197.3, 164.4, 163.8, 134.0, 132.8, 131.7, 130.8, 129.0, 128.4, 124.2, 124.0, 121.8 (q,  $J = 287.1$  Hz), 114.0, 90.5 (q,  $J = 33.2$  Hz), 57.8, 55.5, 36.7;  $^{19}F$  NMR (369 MHz,  $CDCl_3$ )  $\delta$ : -78.1; IR (KBr,  $cm^{-1}$ )  $\nu$ : 3152, 2967, 1739, 1659, 1600, 1184; LRMS (ESI):  $m/z$  418  $[M+Na]^+$ ; HRMS (ESI):  $m/z$  calcd for  $C_{19}H_{16}F_3NO_5Na$   $[M+Na]^+$  418.0873, Found 418.0874.

**3-(3-(4-bromophenyl)propoxy)-*N*-((4-methoxybenzyl)oxy)-3-trifluoromethyl-isoindolinone (S4'v)**

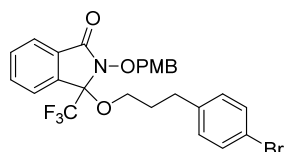

colorless liquid;  $^1H$  NMR (400 MHz,  $CDCl_3$ )  $\delta$ : 7.85-7.90 (m, 1H), 7.60-7.70 (m, 2H), 7.56 (d, 1H,  $J = 7.2$

Hz), 7.47-7.52 (m, 2H), 7.25-7.30 (m, 2H), 6.92-6.97 (m, 4H), 5.26 (d, 1H,  $J = 9.2$  Hz), 5.04 (d, 1H,  $J = 9.2$  Hz), 3.82 (s, 3H), 3.20-3.28 (m, 1H), 2.87-2.95 (m, 1H), 2.52-2.66 (m, 2H), 1.75-1.84 (m, 2H);  $^{13}\text{C}$  NMR (100 MHz,  $\text{CDCl}_3$ )  $\delta$ : 165.5, 160.1, 140.0, 135.1, 133.4, 131.7, 131.28, 131.25, 130.2, 130.0, 126.7, 124.11, 124.05, 122.2 (q,  $J = 285.6$  Hz), 119.6, 113.8, 90.7 (q,  $J = 32.9$  Hz), 78.8, 62.7, 55.2, 31.1, 30.2;  $^{19}\text{F}$  NMR (369 MHz,  $\text{CDCl}_3$ )  $\delta$ : -78.1; IR (neat,  $\text{cm}^{-1}$ )  $\nu$ : 2953, 1742, 1613, 1545, 1253, 1189; LRMS (ESI):  $m/z$  572  $[\text{M}+\text{Na}]^+$ ; HRMS (ESI):  $m/z$  calcd for  $\text{C}_{26}\text{H}_{23}\text{BrF}_3\text{NO}_4\text{Na}$   $[\text{M}+\text{Na}]^+$  572.0655, Found 572.0671.

### 3-(3-(4-bromophenyl)propoxy)-*N*-hydroxy-3-trifluoromethyl-isoindolinone (1v)

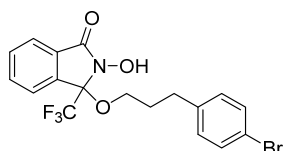

light orange gum;  $^1\text{H}$  NMR (400 MHz,  $\text{CDCl}_3$ )  $\delta$ : 9.80 (s, 1H), 7.75 (d, 1H,  $J = 7.2$  Hz), 7.53-7.68 (m, 3H), 7.37 (d, 2H,  $J = 8.1$  Hz), 7.05 (d, 2H,  $J = 8.1$  Hz), 3.37-3.46 (m, 1H), 2.94-3.04 (m, 1H), 2.63-2.76 (m, 2H), 1.83-2.00 (m, 2H);  $^{13}\text{C}$  NMR (100 MHz,  $\text{CDCl}_3$ )  $\delta$ : 165.8, 140.3, 135.0, 133.3, 131.6, 131.4, 130.2, 129.8, 124.0, 123.9, 121.9 (q,  $J = 286.6$  Hz), 119.6, 90.9 (q,  $J = 33.2$  Hz), 63.2, 31.3, 30.4;  $^{19}\text{F}$  NMR (369 MHz,  $\text{CDCl}_3$ )  $\delta$ : -78.4; IR (neat,  $\text{cm}^{-1}$ )  $\nu$ : 3144, 2950, 1717, 1488, 1305, 1200; LRMS (ESI):  $m/z$  452  $[\text{M}+\text{Na}]^+$ ; HRMS (ESI):  $m/z$  calcd for  $\text{C}_{18}\text{H}_{15}\text{BrF}_3\text{NO}_3\text{Na}$   $[\text{M}+\text{Na}]^+$  452.0080, Found 452.0098.

### 3-(3-(4-bromophenyl)-3-oxopropoxy)-*N*-hydroxy-3-trifluoromethyl-isoindolinone (2v)

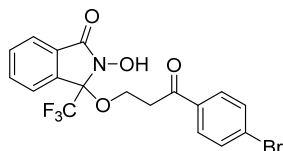

Starting material **1v** (17.2 mg, 0.04 mmol) was oxygenated under condition B of section 2, and **2v** (8.3 mg, 0.019 mmol) was isolated according to the purification procedure described in the General method (47% yield).

light yellow solid;  $^1\text{H}$  NMR (500 MHz,  $\text{CDCl}_3$ )  $\delta$ : 8.48 (brs, 1H), 7.93 (dd, 1H,  $J = 1.1$  Hz, 6.3 Hz), 7.85 (d, 2H,  $J = 8.0$  Hz), 7.61-7.70 (m, 5H), 3.72-3.79 (m, 1H), 3.47-3.56 (m, 1H), 3.38-3.43 (m, 1H), 3.04-3.11 (m, 1H);  $^{13}\text{C}$  NMR (126 MHz,  $\text{CDCl}_3$ )  $\delta$ : 197.7, 164.0, 134.8, 134.0, 133.0, 132.1, 131.7, 130.4, 129.8, 129.4, 124.2, 124.1, 121.7 (q,  $J = 285.9$  Hz), 90.6 (q,  $J = 32.8$  Hz), 58.1, 37.3;  $^{19}\text{F}$  NMR (369 MHz,  $\text{CDCl}_3$ )  $\delta$ : -78.1; IR (KBr,  $\text{cm}^{-1}$ )  $\nu$ : 3220, 2950, 1720, 1678, 1586, 1469, 1398, 1278, 1120; LRMS (ESI):  $m/z$  466  $[\text{M}+\text{Na}]^+$ ; HRMS (ESI):  $m/z$  calcd for  $\text{C}_{18}\text{H}_{13}\text{BrF}_3\text{NO}_4\text{Na}$   $[\text{M}+\text{Na}]^+$  465.9872, Found 465.9855.

### *N*-benzyloxy-3-(3-(4-(4,4,5,5-tetramethyl-1,3,2-dioxaborolan-2-yl)phenyl)propoxy)-3-trifluoromethyl-isoindolinone (S4w)

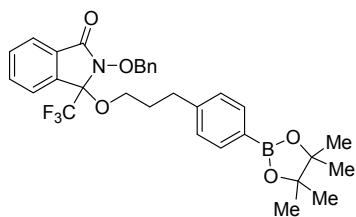

colorless liquid;  $^1\text{H}$  NMR (400 MHz,  $\text{CDCl}_3$ )  $\delta$ : 7.89 (dd, 1H,  $J = 6.5$  Hz, 1.6 Hz), 7.60-7.71 (m, 4H), 7.54-7.60 (m, 3H), 7.35-7.46 (m, 3H), 7.12 (d, 2H,  $J = 8.1$  Hz), 5.31 (d, 1H,  $J = 9.9$  Hz), 5.14 (d, 1H,  $J = 9.9$  Hz), 3.24-3.33 (m, 1H), 2.92-3.00 (m, 1H), 2.58-2.73 (m, 2H), 1.74-1.95 (m, 2H), 1.35 (s, 12H);  $^{13}\text{C}$  NMR (100 MHz,  $\text{CDCl}_3$ )  $\delta$ : 165.6, 144.5, 135.1, 134.9, 134.6, 133.4, 131.6, 130.0, 129.3, 128.8, 128.4, 127.8, 124.2, 124.1, 122.2 (q,  $J = 286.1$  Hz), 90.9 (q,  $J = 33.0$  Hz), 83.6, 79.1, 63.1, 32.0, 30.3, 24.8;  $^{11}\text{B}$  NMR (126 MHz,  $\text{CDCl}_3$ )  $\delta$ : 32.8;  $^{19}\text{F}$  NMR (369 MHz,  $\text{CDCl}_3$ )  $\delta$ : -78.0; IR (neat,  $\text{cm}^{-1}$ )  $\nu$ : 2978, 1746, 1612, 1469, 1362, 1195; LRMS (ESI):  $m/z$  590  $[\text{M}+\text{Na}]^+$ ; HRMS (ESI):  $m/z$  calcd for  $\text{C}_{31}\text{H}_{33}\text{BF}_3\text{NO}_5\text{Na}$   $[\text{M}+\text{Na}]^+$  590.2296, Found 590.2293.

***N*-hydroxy-3-(3-(4-(4,4,5,5-tetramethyl-1,3,2-dioxaborolan-2-yl)phenyl)propoxy)-3-trifluoromethylisoindolinone (1w)**

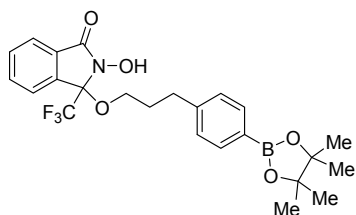

white solid;  $^1\text{H}$  NMR (400 MHz,  $\text{CDCl}_3$ )  $\delta$ : 9.79 (s, 1H), 7.76 (d, 1H,  $J = 6.7$  Hz), 7.73 (d, 2H,  $J = 8.1$  Hz), 7.54-7.67 (m, 3H), 7.18 (d, 2H,  $J = 8.1$  Hz), 3.40-3.49 (m, 1H), 2.96-3.06 (m, 1H), 2.67-2.82 (m, 2H), 1.85-2.05 (m, 2H), 1.35 (s, 12H);  $^{13}\text{C}$  NMR (100 MHz,  $\text{CDCl}_3$ )  $\delta$ : 165.8, 144.8, 135.0, 134.9, 133.2, 131.5, 129.9, 127.9, 124.0, 123.9, 121.9 (q,  $J = 286.6$  Hz), 91.0 (q,  $J = 33.2$  Hz), 83.7, 63.4, 32.1, 30.4, 24.8;  $^{11}\text{B}$  NMR (126 MHz,  $\text{CDCl}_3$ )  $\delta$ : 33.3;  $^{19}\text{F}$  NMR (369 MHz,  $\text{CDCl}_3$ )  $\delta$ : -78.4; IR (KBr,  $\text{cm}^{-1}$ )  $\nu$ : 3177, 2979, 1719, 1613, 1470, 1362, 1200; LRMS (ESI):  $m/z$  500  $[\text{M}+\text{Na}]^+$ ; HRMS (ESI):  $m/z$  calcd for  $\text{C}_{24}\text{H}_{27}\text{BF}_3\text{NO}_5\text{Na}$   $[\text{M}+\text{Na}]^+$  500.1827, Found 500.1802.

***N*-hydroxy-3-(3-oxo-3-(4-(4,4,5,5-tetramethyl-1,3,2-dioxaborolan-2-yl)phenyl)propoxy)-3-trifluoromethylisoindolinone (2w)**

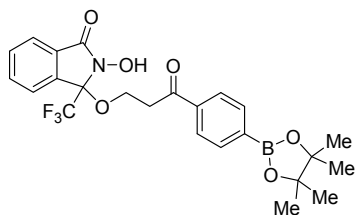

Starting material **1w** (19.1 mg, 0.04 mmol) was oxygenated under condition A of section 2, and **2w** (4.9 mg, 0.010 mmol) was isolated according to the purification procedure described in the General method

(25% yield).

light yellow solid;  $^1\text{H}$  NMR (500 MHz,  $\text{CDCl}_3$ )  $\delta$ : 8.60 (s, 1H), 7.89-7.97 (m, 5H), 7.61-7.70 (m, 3H), 3.74-3.80 (m, 1H), 3.53-3.61 (m, 1H), 3.38-3.43 (m, 1H), 3.08-3.16 (m, 1H), 1.36 (s, 12H);  $^{13}\text{C}$  NMR (100 MHz,  $\text{CDCl}_3$ )  $\delta$ : 199.1, 163.6, 137.8, 135.0, 133.9, 132.9, 131.7, 130.7, 127.3, 124.3, 124.1, 121.8 (q,  $J = 285.6$  Hz), 90.5 (q,  $J = 33.5$  Hz), 84.3, 57.8, 37.4, 24.8;  $^{11}\text{B}$  NMR (126 MHz,  $\text{CDCl}_3$ )  $\delta$ : 32.9;  $^{19}\text{F}$  NMR (369 MHz,  $\text{CDCl}_3$ )  $\delta$ : -78.1; IR (neat,  $\text{cm}^{-1}$ )  $\nu$ : 3426, 2979, 1722, 1508, 1469, 1360, 1199; LRMS (ESI):  $m/z$  514  $[\text{M}+\text{Na}]^+$ ; HRMS (ESI):  $m/z$  calcd for  $\text{C}_{24}\text{H}_{25}\text{BF}_3\text{NO}_6\text{Na}$   $[\text{M}+\text{Na}]^+$  514.1619, Found 514.1621.

### 3-(3-(2-iodophenyl)propoxy)-*N*-((4-methoxybenzyl)oxy)-3-trifluoromethyl-isoindolinone (S4'x)

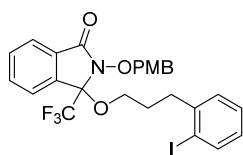

yellow liquid;  $^1\text{H}$  NMR (500 MHz,  $\text{CDCl}_3$ )  $\delta$ : 7.89-7.76 (d, 1H,  $J = 7.4$  Hz), 7.61-7.71 (m, 3H), 7.48-7.53 (m, 2H), 7.11-7.18 (m, 2H), 6.90-6.94 (m, 2H), 6.82-6.87 (m, 1H), 5.26 (d, 1H,  $J = 9.2$  Hz), 5.06 (d, 1H,  $J = 9.2$  Hz), 3.81 (s, 3H), 3.29-3.36 (m, 1H), 2.96-3.02 (m, 1H), 2.67-2.78 (m, 2H), 1.78-1.87 (m, 2H);  $^{13}\text{C}$  NMR (126 MHz,  $\text{CDCl}_3$ )  $\delta$ : 165.5, 160.1, 143.7, 139.5, 135.2, 133.4, 131.7, 131.2, 130.1, 129.4, 128.2, 127.8, 126.8, 124.24, 124.16, 122.2 (q,  $J = 286.7$  Hz), 113.9, 100.4, 90.9 (q,  $J = 32.8$  Hz), 78.9, 63.1, 55.3, 36.9, 29.3;  $^{19}\text{F}$  NMR (369 MHz,  $\text{CDCl}_3$ )  $\delta$ : -78.0; IR (neat,  $\text{cm}^{-1}$ )  $\nu$ : 1742, 1613, 1515, 1467, 1252, 1187; LRMS (ESI):  $m/z$  620  $[\text{M}+\text{Na}]^+$ ; HRMS (ESI):  $m/z$  calcd for  $\text{C}_{26}\text{H}_{23}\text{F}_3\text{INO}_4\text{Na}$   $[\text{M}+\text{Na}]^+$  620.0516, Found 620.0514.

### *N*-hydroxy-3-(3-(2-iodophenyl)propoxy)-3-trifluoromethyl-isoindolinone (1x)

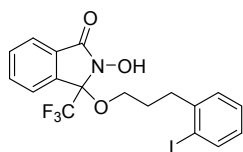

light yellow liquid;  $^1\text{H}$  NMR (400 MHz,  $\text{CDCl}_3$ )  $\delta$ : 9.81 (brs, 1H), 7.79 (d, 2H,  $J = 7.6$  Hz), 7.56-7.69 (m, 3H), 7.23-7.29 (m, 2H), 6.83-6.91 (m, 1H), 3.45-3.54 (m, 1H), 3.02-3.10 (m, 1H), 2.76-2.90 (m, 2H), 1.87-2.02 (m, 2H);  $^{13}\text{C}$  NMR (100 MHz,  $\text{CDCl}_3$ )  $\delta$ : 165.7, 143.8, 139.5, 135.1, 133.3, 131.6, 129.9, 129.6, 128.4, 127.9, 124.1, 124.0, 121.9 (q,  $J = 286.6$  Hz), 100.4, 91.0 (q,  $J = 33.2$  Hz), 63.4, 37.0, 29.3;  $^{19}\text{F}$  NMR (369 MHz,  $\text{CDCl}_3$ )  $\delta$ : -78.4; IR (neat,  $\text{cm}^{-1}$ )  $\nu$ : 3143, 2943, 1716, 1468, 1304, 1192; LRMS (ESI):  $m/z$  500  $[\text{M}+\text{Na}]^+$ ; HRMS (ESI):  $m/z$  calcd for  $\text{C}_{18}\text{H}_{15}\text{F}_3\text{INO}_3\text{Na}$   $[\text{M}+\text{Na}]^+$  499.9941, Found 499.9943.

### *N*-hydroxy-3-(3-(2-iodophenyl)-3-oxopropoxy)-3-trifluoromethyl-isoindolinone (2x)

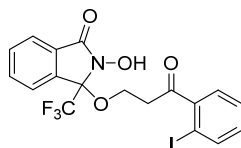

Starting material **1x** (23.9 mg, 0.05 mmol) was oxygenated under condition B of section 2, and **2x** (13.0 mg, 0.026 mmol) was isolated according to the purification procedure described in the General method (53% yield).

light yellow liquid;  $^1\text{H NMR}$  (500 MHz,  $\text{CDCl}_3$ )  $\delta$ : 8.77 (brs, 1H), 7.96 (d, 1H,  $J = 7.7$  Hz), 7.88 (d, 1H,  $J = 6.9$  Hz), 7.60-7.70 (m, 3H), 7.50 (dd, 1H,  $J = 7.7$  Hz, 1.5 Hz), 7.44 (t, 1H,  $J = 7.7$  Hz), 7.16 (td, 1H,  $J = 7.7$  Hz, 1.5 Hz), 3.79 (td, 1H,  $J = 8.9$  Hz, 4.0 Hz), 3.42-3.51 (m, 1H), 3.31-3.42 (m, 1H), 3.13-3.24 (m, 1H);  $^{13}\text{C NMR}$  (126 MHz,  $\text{CDCl}_3$ )  $\delta$ : 202.7, 164.3, 142.8, 141.1, 134.1, 133.1, 132.4, 131.8, 130.4, 128.4, 128.2, 124.2, 121.8 (q,  $J = 286.7$  Hz), 91.1, 90.7 (q,  $J = 33.6$  Hz), 58.4, 40.6;  $^{19}\text{F NMR}$  (369 MHz,  $\text{CDCl}_3$ )  $\delta$ : -78.0; IR (neat,  $\text{cm}^{-1}$ ) v: 3166, 2926, 1715, 1468, 1192; LRMS (ESI):  $m/z$  514  $[\text{M}+\text{Na}]^+$ ; HRMS (ESI):  $m/z$  calcd for  $\text{C}_{18}\text{H}_{13}\text{F}_3\text{INO}_4\text{Na}$   $[\text{M}+\text{Na}]^+$  513.9734, Found 513.9727.

***N*-benzyloxy-3-trifluoromethyl-3-(3-(2-(trimethylsilyl)phenyl)propoxy)-isoindolinone (S4y)**

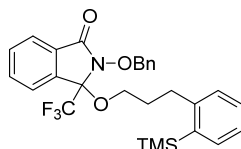

colorless liquid;  $^1\text{H NMR}$  (500 MHz,  $\text{CDCl}_3$ )  $\delta$ : 7.93 (d, 1H,  $J = 7.4$  Hz), 7.63-7.74 (m, 3H), 7.57 (d, 2H,  $J = 6.9$  Hz), 7.47 (dd, 1H,  $J = 7.4$  Hz, 1.4 Hz), 7.35-7.43 (m, 3H), 7.26 (td, 1H,  $J = 7.4$  Hz, 1.4 Hz), 7.17 (t, 1H,  $J = 7.4$  Hz), 7.13 (d, 1H,  $J = 7.4$  Hz), 5.35 (d, 1H,  $J = 9.2$  Hz), 5.17 (d, 1H,  $J = 9.2$  Hz), 3.37-3.43 (m, 1H), 3.03-3.10 (m, 1H), 2.72-2.85 (m, 2H), 1.77-1.90 (m, 2H), 0.31 (s, 9H);  $^{13}\text{C NMR}$  (126 MHz,  $\text{CDCl}_3$ )  $\delta$ : 165.6, 147.1, 138.1, 135.2, 134.57, 134.56, 133.5, 131.7, 130.1, 129.4, 129.2, 128.8, 128.4, 125.2, 124.2, 122.2 (q,  $J = 285.9$  Hz), 90.9 (q,  $J = 33.2$  Hz), 79.2, 63.8, 32.5, 31.7, 0.24;  $^{19}\text{F NMR}$  (369 MHz,  $\text{CDCl}_3$ )  $\delta$ : -78.0; IR (neat,  $\text{cm}^{-1}$ ) v: 1746, 1465, 1188; LRMS (ESI):  $m/z$  536  $[\text{M}+\text{Na}]^+$ ; HRMS (ESI):  $m/z$  calcd for  $\text{C}_{28}\text{H}_{30}\text{F}_3\text{NO}_3\text{SiNa}$   $[\text{M}+\text{Na}]^+$  536.1839, Found 536.1816.

***N*-hydroxy-3-trifluoromethyl-3-(3-(2-(trimethylsilyl)phenyl)propoxy)-isoindolinone (1y)**

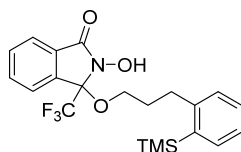

colorless liquid;  $^1\text{H NMR}$  (500 MHz,  $\text{CDCl}_3$ )  $\delta$ : 10.00 (brs, 1H), 7.84 (d, 1H,  $J = 7.4$  Hz), 7.60-7.74 (m, 3H), 7.53 (d, 1H,  $J = 7.4$  Hz), 7.34 (t, 1H,  $J = 7.4$  Hz), 7.19-7.25 (m, 2H), 3.60-3.66 (m, 1H), 3.14-3.21 (m, 1H), 2.86-3.00 (m, 2H), 1.90-2.07 (m, 2H), 0.39 (s, 9H);  $^{13}\text{C NMR}$  (126 MHz,  $\text{CDCl}_3$ )  $\delta$ : 165.9, 147.3, 138.3, 135.2, 134.6, 133.3, 131.5, 130.0, 129.2, 128.5, 125.2, 124.0, 123.9, 121.9 (q,  $J = 286.7$  Hz), 91.1 (q,

$J = 32.8$  Hz), 64.0, 32.6, 31.6, 0.27;  $^{19}\text{F}$  NMR (369 MHz,  $\text{CDCl}_3$ )  $\delta$ :  $-78.4$ ; IR (neat,  $\text{cm}^{-1}$ )  $\nu$ : 3152, 2953, 1718, 1469, 1200; LRMS (ESI):  $m/z$  446  $[\text{M}+\text{Na}]^+$ ; HRMS (ESI):  $m/z$  calcd for  $\text{C}_{21}\text{H}_{24}\text{F}_3\text{NO}_3\text{SiNa}$   $[\text{M}+\text{Na}]^+$  446.1370, Found 446.1351.

***N*-hydroxy-3-(3-oxo-3-(2-(trimethylsilyl)phenyl)propoxy)-3-trifluoromethyl-isoindolinone (2y)**

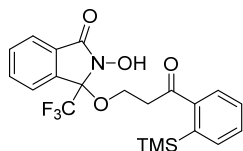

Starting material **1y** (98.0 mg, 0.23 mmol) was oxygenated under condition B of section 2, and **2y** (62.6 mg, 0.14 mmol) was isolated according to the purification procedure described in the General method (62% yield).

light yellow solid;  $^1\text{H}$  NMR (400 MHz,  $\text{CDCl}_3$ )  $\delta$ : 8.83 (brs, 1H), 7.88-7.93 (m, 2H), 7.77 (dd, 1H,  $J = 7.4$  Hz, 1.1 Hz), 7.60-7.71 (m, 3H), 7.56 (td, 1H,  $J = 7.5$  Hz, 1.3 Hz), 7.48 (td, 1H,  $J = 7.5$  Hz, 1.3 Hz), 3.79 (td, 1H,  $J = 9.4$  Hz, 2.7 Hz), 3.47-3.58 (m, 1H), 3.39-3.47 (m, 1H), 3.16-3.26 (m, 1H), 0.29 (s, 9H);  $^{13}\text{C}$  NMR (100 MHz,  $\text{CDCl}_3$ )  $\delta$ : 201.3, 163.4, 142.9, 141.5, 136.3, 133.9, 132.9, 132.5, 131.7, 130.7, 129.5, 128.9, 124.3, 124.1, 121.8 (q,  $J = 286.6$  Hz), 90.5 (q,  $J = 33.5$  Hz), 57.7, 37.9, 0.23;  $^{19}\text{F}$  NMR (369 MHz,  $\text{CDCl}_3$ )  $\delta$ :  $-78.0$ ; IR (KBr,  $\text{cm}^{-1}$ )  $\nu$ : 3228, 2953, 1719, 1469, 1200; LRMS (ESI):  $m/z$  460  $[\text{M}+\text{Na}]^+$ ; HRMS (ESI):  $m/z$  calcd for  $\text{C}_{21}\text{H}_{22}\text{F}_3\text{NO}_4\text{SiNa}$   $[\text{M}+\text{Na}]^+$  460.1162, Found 460.1180.

**3-(3-(4-ethylphenyl)propoxy)-*N*-benzyloxy-3-trifluoromethyl-isoindolinone (S4z)**

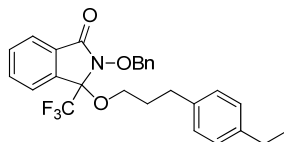

light yellow liquid;  $^1\text{H}$  NMR (500 MHz,  $\text{CDCl}_3$ )  $\delta$ : 7.89 (d, 1H,  $J = 6.9$  Hz), 7.61-7.68 (m, 2H), 7.55-7.60 (m, 3H), 7.36-7.44 (m, 3H), 7.00-7.06 (m, 4H), 5.30 (d, 1H,  $J = 9.5$  Hz), 5.13 (d, 1H,  $J = 9.5$  Hz), 3.26-3.32 (m, 1H), 2.94-2.99 (m, 1H), 2.56-2.68 (m, 4H), 1.77-1.92 (m, 2H), 1.21 (t, 3H,  $J = 7.7$  Hz);  $^{13}\text{C}$  NMR (126 MHz,  $\text{CDCl}_3$ )  $\delta$ : 165.6, 141.8, 138.3, 135.2, 134.6, 133.4, 131.6, 130.1, 129.4, 128.8, 128.5, 128.3, 127.8, 124.3, 124.1, 122.2 (q,  $J = 285.5$  Hz), 91.0 (q,  $J = 32.8$  Hz), 79.1, 63.2, 31.3, 30.5, 28.4, 15.6;  $^{19}\text{F}$  NMR (369 MHz,  $\text{CDCl}_3$ )  $\delta$ :  $-78.0$ ; IR (neat,  $\text{cm}^{-1}$ )  $\nu$ : 2960, 1745, 1468, 1188; LRMS (ESI):  $m/z$  492  $[\text{M}+\text{Na}]^+$ ; HRMS (ESI):  $m/z$  calcd for  $\text{C}_{27}\text{H}_{26}\text{F}_3\text{NO}_3\text{Na}$   $[\text{M}+\text{Na}]^+$  492.1757, Found 492.1767.

**3-(3-(4-ethylphenyl)propoxy)-*N*-hydroxy-3-trifluoromethyl-isoindolinone (1z)**

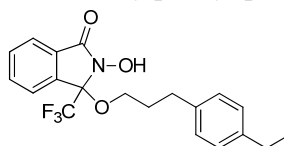

light yellow liquid;  $^1\text{H}$  NMR (500 MHz,  $\text{CDCl}_3$ )  $\delta$ : 9.80 (brs, 1H), 7.75 (d, 1H,  $J = 6.9$  Hz), 7.59-7.64 (m, 1H), 7.53-7.58 (m, 2H), 7.05-7.12 (m, 4H), 3.41-3.47 (m, 1H), 2.96-3.04 (m, 1H), 2.63-2.75 (m, 2H), 2.60

(q, 2H,  $J = 7.7$  Hz), 1.85-2.01 (m, 2H), 1.21 (t, 3H,  $J = 7.7$  Hz);  $^{13}\text{C}$  NMR (126 MHz,  $\text{CDCl}_3$ )  $\delta$ : 165.8, 141.7, 138.5, 135.1, 133.2, 131.5, 129.9, 128.3, 127.8, 124.1, 123.9, 121.9 (q,  $J = 286.7$  Hz), 91.0 (q,  $J = 32.8$  Hz), 63.5, 31.4, 30.6, 28.4, 15.6;  $^{19}\text{F}$  NMR (369 MHz,  $\text{CDCl}_3$ )  $\delta$ : -78.4; IR (neat,  $\text{cm}^{-1}$ )  $\nu$ : 3421, 2962, 1716, 1643, 1200; LRMS (ESI):  $m/z$  402  $[\text{M}+\text{Na}]^+$ ; HRMS (ESI):  $m/z$  calcd for  $\text{C}_{20}\text{H}_{20}\text{F}_3\text{NO}_3\text{Na}$   $[\text{M}+\text{Na}]^+$  402.1288, Found 402.1273.

### 3-(3-(4-ethylphenyl)-3-oxopropoxy)-*N*-hydroxy-3-trifluoromethyl-isoindolinone (2z)

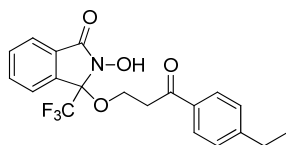

Starting material **1z** (15.2 mg, 0.04 mmol) was oxygenated under condition B of section 2, and **2z** (8.6 mg, 0.022 mmol) was isolated according to the purification procedure described in the General method (55% yield).

light yellow liquid;  $^1\text{H}$  NMR (500 MHz,  $\text{CDCl}_3$ )  $\delta$ : 8.82 (brs, 1H), 7.89-7.94 (m, 3H), 7.61-7.70 (m, 3H), 7.31 (d, 2H,  $J = 8.0$  Hz), 3.73-3.80 (m, 1H), 3.50-3.58 (m, 1H), 3.37-3.43 (m, 1H), 3.05-3.12 (m, 1H), 2.72 (q, 2H,  $J = 7.5$  Hz), 1.26 (t, 3H,  $J = 7.5$  Hz);  $^{13}\text{C}$  NMR (126 MHz,  $\text{CDCl}_3$ )  $\delta$ : 198.6, 163.2, 151.5, 133.9, 133.7, 132.8, 131.7, 130.9, 128.7, 128.3, 124.3, 124.0, 121.8 (q,  $J = 286.7$  Hz), 90.4 (q,  $J = 33.4$  Hz), 57.6, 37.0, 29.0, 15.1;  $^{19}\text{F}$  NMR (369 MHz,  $\text{CDCl}_3$ )  $\delta$ : -78.1; IR (neat,  $\text{cm}^{-1}$ )  $\nu$ : 3433, 1644, 1190; LRMS (ESI):  $m/z$  416  $[\text{M}+\text{Na}]^+$ ; HRMS (ESI):  $m/z$  calcd for  $\text{C}_{20}\text{H}_{18}\text{F}_3\text{NO}_4\text{Na}$   $[\text{M}+\text{Na}]^+$  416.1080, Found 416.1088.

### *N*-hydroxy-3-((3-oxooct-4-yn-1-yl)oxy)-3-trifluoromethyl-isoindolinone (2aa)

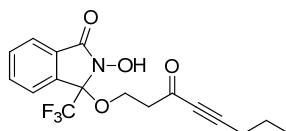

Starting material **1aa** (13.7 mg, 0.04 mmol) was oxygenated under condition A of section 2, and **2aa** (6.1 mg, 0.017 mmol) was isolated according to the purification procedure described in the General method (43% yield).

light yellow liquid (unstable);  $^1\text{H}$  NMR (400 MHz,  $\text{CDCl}_3$ )  $\delta$ : 7.87 (d, 1H,  $J = 6.7$  Hz), 7.56-7.71 (m, 3H), 3.62 (dt, 1H,  $J = 3.6$  Hz, 9.2 Hz), 3.26-3.34 (m, 1H), 2.97-3.08 (m, 1H), 2.79-2.88 (m, 1H), 2.36 (t, 2H,  $J = 7.0$  Hz), 1.55-1.67 (m, 2H), 1.01 (t, 3H,  $J = 7.4$  Hz);  $^{13}\text{C}$  NMR (100 MHz,  $\text{CDCl}_3$ )  $\delta$ : 185.7, 164.1, 134.0, 133.1, 131.7, 130.4, 124.2, 121.7 (q,  $J = 286.7$  Hz), 97.2, 90.6 (q,  $J = 33.2$  Hz), 80.8, 57.7, 44.2, 21.1, 20.9, 13.4;  $^{19}\text{F}$  NMR (369 MHz,  $\text{CDCl}_3$ )  $\delta$ : -78.2; IR (neat,  $\text{cm}^{-1}$ )  $\nu$ : 3215, 2967, 2213, 1720, 1674, 1470, 1191; LRMS (ESI):  $m/z$  378  $[\text{M}+\text{Na}]^+$ ; HRMS (ESI):  $m/z$  calcd for  $\text{C}_{17}\text{H}_{16}\text{F}_3\text{NO}_4\text{Na}$   $[\text{M}+\text{Na}]^+$  378.0924, Found 378.0929.

### 3-((6,6-dimethylhept-4-yn-1-yl)oxy)-*N*-((4-methoxybenzyl)oxy)-3-trifluoromethyl-isoindolinone (S4'ab)

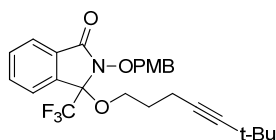

light yellow liquid;  $^1\text{H NMR}$  (500 MHz,  $\text{CDCl}_3$ )  $\delta$ : 7.89 (d, 1H,  $J = 6.9$  Hz), 7.59-7.71 (m, 3H), 7.49 (d, 2H,  $J = 8.6$  Hz), 6.92 (d, 2H,  $J = 8.6$  Hz), 5.25 (d, 1H,  $J = 9.2$  Hz), 5.08 (d, 1H,  $J = 9.2$  Hz), 3.81 (s, 3H), 3.33-3.39 (m, 1H), 3.05-3.12 (m, 1H), 2.15-2.26 (m, 2H), 1.62-1.78 (m, 2H), 1.07 (s, 9H);  $^{13}\text{C NMR}$  (126 MHz,  $\text{CDCl}_3$ )  $\delta$ : 165.4, 160.1, 135.2, 133.4, 131.6, 131.1, 130.2, 126.8, 124.3, 124.1, 122.1 (q,  $J = 286.3$  Hz), 113.8, 91.0 (q,  $J = 33.2$  Hz), 89.6, 78.9, 76.9, 62.6, 55.2, 31.2, 28.6, 27.1, 15.1;  $^{19}\text{F NMR}$  (369 MHz,  $\text{CDCl}_3$ )  $\delta$ : -78.0; IR (neat,  $\text{cm}^{-1}$ )  $\nu$ : 2966, 1746, 1613, 1516, 1468, 1253, 1187; LRMS (ESI):  $m/z$  498  $[\text{M}+\text{Na}]^+$ ; HRMS (ESI):  $m/z$  calcd for  $\text{C}_{26}\text{H}_{28}\text{F}_3\text{NO}_4\text{Na}$   $[\text{M}+\text{Na}]^+$  498.1863, Found 498.1855.

### 3-((6,6-dimethylhept-4-yn-1-yl)oxy)-N-hydroxy-3-(trifluoromethyl)-isoindolinone (**1ab**)

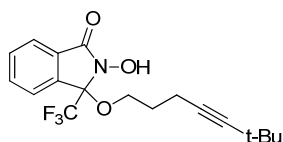

yellow liquid;  $^1\text{H NMR}$  (500 MHz,  $\text{CDCl}_3$ )  $\delta$ : 9.41 (brs, 1H), 7.82 (d, 1H,  $J = 7.4$  Hz), 7.57-7.68 (m, 3H), 3.43-3.49 (m, 1H), 3.12-3.17 (m, 1H), 2.29 (t, 2H,  $J = 6.9$  Hz), 1.71-1.84 (m, 2H), 1.10 (s, 9H);  $^{13}\text{C NMR}$  (126 MHz,  $\text{CDCl}_3$ )  $\delta$ : 165.4, 135.0, 133.2, 131.5, 130.0, 124.1, 123.9, 121.9 (q,  $J = 285.5$  Hz), 90.9 (q,  $J = 33.2$  Hz), 90.0, 77.1, 62.5, 31.2, 28.4, 27.2, 15.1;  $^{19}\text{F NMR}$  (369 MHz,  $\text{CDCl}_3$ )  $\delta$ : -78.4; IR (neat,  $\text{cm}^{-1}$ )  $\nu$ : 3423, 2968, 1719, 1470, 1200; LRMS (ESI):  $m/z$  378  $[\text{M}+\text{Na}]^+$ ; HRMS (ESI):  $m/z$  calcd for  $\text{C}_{18}\text{H}_{20}\text{F}_3\text{NO}_3\text{Na}$   $[\text{M}+\text{Na}]^+$  378.1288, Found 378.1280.

### 3-((6,6-dimethyl-3-oxohept-4-yn-1-yl)oxy)-N-hydroxy-3-(trifluoromethyl)-isoindolinone (**2ab**)

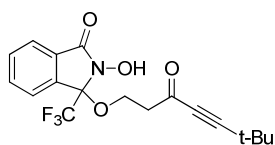

Starting material **1ab** (18.2 mg, 0.04 mmol) was oxygenated under condition A of section 2, and **2ab** (7.6 mg, 0.021 mmol) was isolated according to the purification procedure described in the General method (47% yield).

light yellow liquid (unstable);  $^1\text{H NMR}$  (500 MHz,  $\text{CDCl}_3$ )  $\delta$ : 8.69 (brs, 1H), 7.85-7.88 (m, 1H), 7.59-7.69 (m, 3H), 3.62 (dt, 1H,  $J = 4.0$  Hz, 9.2 Hz), 3.27-3.32 (m, 1H), 2.97-3.06 (m, 1H), 2.80-2.87 (m, 1H), 1.27 (s, 9H);  $^{13}\text{C NMR}$  (126 MHz,  $\text{CDCl}_3$ )  $\delta$ : 185.9, 164.2, 134.1, 133.1, 131.7, 130.4, 124.2, 123.9, 121.7 (q,  $J = 286.3$  Hz), 104.3, 90.6 (q,  $J = 33.6$  Hz), 79.2, 57.7, 44.2, 29.9, 27.8;  $^{19}\text{F NMR}$  (369 MHz,  $\text{CDCl}_3$ )  $\delta$ : -78.2; IR (neat,  $\text{cm}^{-1}$ )  $\nu$ : 3196, 2974, 2211, 1719, 1675, 1470, 1199; LRMS (ESI):  $m/z$  392  $[\text{M}+\text{Na}]^+$ ; HRMS (ESI):  $m/z$  calcd for  $\text{C}_{18}\text{H}_{18}\text{F}_3\text{NO}_4\text{Na}$   $[\text{M}+\text{Na}]^+$  392.1080, Found 392.1070.

### N-((4-methoxybenzyl)oxy)-3-((8-methylnon-4-yn-1-yl)oxy)-3-(trifluoromethyl)-isoindolinone (**S4'ac**)



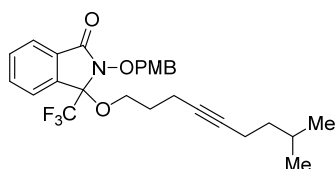

colorless liquid;  $^1\text{H}$  NMR (400 MHz,  $\text{CDCl}_3$ )  $\delta$ : 7.89 (dd, 1H,  $J = 6.5$  Hz, 1.1 Hz), 7.60-7.71 (m, 3H), 7.46-7.52 (m, 2H), 6.90-6.95 (m, 2H), 5.25 (d, 1H,  $J = 9.2$  Hz), 5.08 (d, 1H,  $J = 9.2$  Hz), 3.82 (s, 3H), 3.34-3.41 (m, 1H), 3.04-3.12 (m, 1H), 2.19-2.26 (m, 2H), 1.96-2.04 (m, 2H), 1.61-1.80 (m, 2H), 1.50-1.60 (m, 1H), 1.24 (q, 2H,  $J = 7.2$  Hz), 0.80-0.84 (m, 6H);  $^{13}\text{C}$  NMR (100 MHz,  $\text{CDCl}_3$ )  $\delta$ : 165.4, 160.1, 135.1, 133.3, 131.6, 131.1, 130.2, 126.8, 124.3, 124.1, 122.1 (q,  $J = 285.9$  Hz), 113.8, 91.0 (q,  $J = 32.9$  Hz), 81.0, 78.9, 78.4, 62.5, 55.2, 37.9, 28.5, 27.1, 22.10, 22.08, 16.6, 15.2;  $^{19}\text{F}$  NMR (369 MHz,  $\text{CDCl}_3$ )  $\delta$ : -78.0; IR (neat,  $\text{cm}^{-1}$ )  $\nu$ : 2956, 1744, 1613, 1515, 1468, 1253, 1187; LRMS (ESI):  $m/z$  512  $[\text{M}+\text{Na}]^+$ ; HRMS (ESI):  $m/z$  calcd for  $\text{C}_{27}\text{H}_{30}\text{F}_3\text{NO}_4\text{Na}$   $[\text{M}+\text{Na}]^+$  512.2019, Found 512.2003.

### ***N*-hydroxy-3-((8-methylnon-4-yn-1-yl)oxy)-3-(trifluoromethyl)-isoindolinone (1ac)**

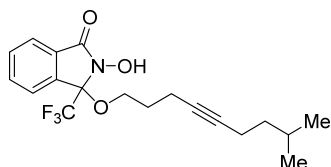

light yellow liquid;  $^1\text{H}$  NMR (500 MHz,  $\text{CDCl}_3$ )  $\delta$ : 9.30 (brs, 1H), 7.82 (d, 1H,  $J = 7.4$  Hz), 7.58-7.68 (m, 3H), 3.44-3.50 (m, 1H), 3.12-3.18 (m, 1H), 2.29-2.35 (m, 2H), 2.04-2.10 (m, 2H), 1.71-1.85 (m, 2H), 1.53-1.63 (m, 1H), 1.29 (q, 2H,  $J = 7.5$  Hz), 0.82-0.86 (m, 6H);  $^{13}\text{C}$  NMR (126 MHz,  $\text{CDCl}_3$ )  $\delta$ : 165.4, 135.0, 133.1, 131.5, 130.1, 124.2, 123.9, 121.9 (q,  $J = 286.7$  Hz), 90.9 (q,  $J = 33.2$  Hz), 81.5, 78.7, 62.5, 37.9, 28.2, 27.2, 22.1, 16.6, 15.2;  $^{19}\text{F}$  NMR (369 MHz,  $\text{CDCl}_3$ )  $\delta$ : -78.2; IR (neat,  $\text{cm}^{-1}$ )  $\nu$ : 3159, 2956, 1718, 1469, 1305, 1191; LRMS (ESI):  $m/z$  392  $[\text{M}+\text{Na}]^+$ ; HRMS (ESI):  $m/z$  calcd for  $\text{C}_{19}\text{H}_{22}\text{F}_3\text{NO}_3\text{Na}$   $[\text{M}+\text{Na}]^+$  392.1444, Found 392.1442.

### ***N*-hydroxy-3-((8-methyl-3-oxonon-4-yn-1-yl)oxy)-3-(trifluoromethyl)-isoindolinone (2ac)**

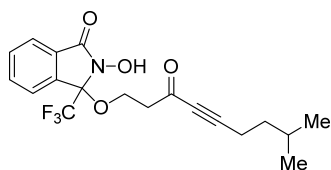

Starting material **1ac** (73.9 mg, 0.2 mmol) was oxygenated under condition A of section 2, and **2ac** (26.0 mg, 0.068 mmol) was isolated according to the purification procedure described in the General method (34% yield).

yellow liquid;  $^1\text{H}$  NMR (400 MHz,  $\text{CDCl}_3$ )  $\delta$ : 8.77 (brs, 1H), 7.86 (d, 1H,  $J = 6.7$  Hz), 7.58-7.69 (m, 3H), 3.62 (td, 1H,  $J = 9.0$  Hz, 4.0 Hz), 3.27-3.34 (m, 1H), 2.95-3.05 (m, 1H), 2.84 (td, 1H,  $J = 4.7$  Hz, 18.5 Hz), 2.37 (t, 2H,  $J = 7.3$  Hz), 1.60-1.73 (m, 1H), 1.47 (q, 2H,  $J = 7.3$  Hz), 0.90 (d, 6H,  $J = 6.7$  Hz);  $^{13}\text{C}$  NMR (100 MHz,  $\text{CDCl}_3$ )  $\delta$ : 185.6, 164.3, 134.1, 133.1, 131.7, 130.3, 124.19, 124.16, 121.7 (q,  $J = 286.6$  Hz),

97.3, 90.6 (q,  $J = 33.5$  Hz), 80.6, 57.8, 44.2, 36.3, 27.3, 21.9, 17.0;  $^{19}\text{F}$  NMR (369 MHz,  $\text{CDCl}_3$ )  $\delta$ : -78.2; IR (neat,  $\text{cm}^{-1}$ )  $\nu$ : 3182, 2958, 2212, 1721, 1675, 1469, 1190; LRMS (ESI):  $m/z$  406  $[\text{M}+\text{Na}]^+$ ; HRMS (ESI):  $m/z$  calcd for  $\text{C}_{19}\text{H}_{20}\text{F}_3\text{NO}_4\text{Na}$   $[\text{M}+\text{Na}]^+$  406.1237, Found 406.1234.

***N*-((4-methoxybenzyl)oxy)-3-(3-(thiophen-2-yl)propoxy)-3-trifluoromethyl-isoindolinone (S4'ad)**

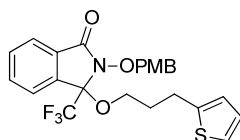

light yellow liquid;  $^1\text{H}$  NMR (500 MHz,  $\text{CDCl}_3$ )  $\delta$ : 7.89 (d, 1H,  $J = 6.9$  Hz), 7.61-7.69 (m, 2H), 7.58 (d, 1H,  $J = 7.4$  Hz), 7.50 (d, 2H,  $J = 8.6$  Hz), 7.07 (dd, 1H,  $J = 5.2$  Hz, 1.1 Hz), 6.92-6.96 (m, 2H), 6.84 (dd, 1H,  $J = 5.2$  Hz, 3.4 Hz), 6.69-6.71 (m, 1H), 5.25 (d, 1H,  $J = 9.5$  Hz), 5.06 (d, 1H,  $J = 9.5$  Hz), 3.82 (s, 3H), 3.28-3.35 (m, 1H), 2.96-3.03 (m, 1H), 2.87 (t, 2H,  $J = 7.4$  Hz), 1.83-1.97 (m, 2H);  $^{13}\text{C}$  NMR (126 MHz,  $\text{CDCl}_3$ )  $\delta$ : 165.5, 160.1, 143.8, 135.1, 133.4, 131.6, 131.2, 130.1, 126.8, 126.7, 124.4, 124.2, 124.1, 123.1, 122.2 (q,  $J = 285.5$  Hz), 113.8, 90.8 (q,  $J = 32.8$  Hz), 78.8, 62.8, 55.2, 30.8, 26.0;  $^{19}\text{F}$  NMR (369 MHz,  $\text{CDCl}_3$ )  $\delta$ : -78.0; IR (neat,  $\text{cm}^{-1}$ )  $\nu$ : 3437, 2953, 1742, 1613, 1515, 1253, 1188; LRMS (ESI):  $m/z$  500  $[\text{M}+\text{Na}]^+$ ; HRMS (ESI):  $m/z$  calcd for  $\text{C}_{24}\text{H}_{22}\text{F}_3\text{NO}_4\text{SNa}$   $[\text{M}+\text{Na}]^+$  500.1114, Found 500.1136.

***N*-hydroxy-3-(3-(thiophen-2-yl)propoxy)-3-trifluoromethyl-isoindolinone (1ad)**

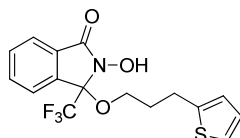

light yellow liquid;  $^1\text{H}$  NMR (500 MHz,  $\text{CDCl}_3$ )  $\delta$ : 9.66 (brs, 1H), 7.76-7.80 (m, 1H), 7.62-7.67 (m, 1H), 7.56-7.61 (m, 2H), 7.08-7.10 (m, 1H), 6.90 (dd, 1H,  $J = 5.2$  Hz, 3.4 Hz), 3.42-3.49 (m, 1H), 3.03-3.09 (m, 1H), 2.97 (t, 2H,  $J = 7.4$  Hz), 1.93-2.09 (m, 2H);  $^{13}\text{C}$  NMR (126 MHz,  $\text{CDCl}_3$ )  $\delta$ : 165.8, 144.1, 135.0, 133.3, 131.5, 129.9, 126.7, 124.5, 124.1, 123.9, 123.1, 121.9 (q,  $J = 286.3$  Hz), 91.0 (q,  $J = 33.2$  Hz), 63.1, 30.9, 26.1;  $^{19}\text{F}$  NMR (369 MHz,  $\text{CDCl}_3$ )  $\delta$ : -78.4; IR (neat,  $\text{cm}^{-1}$ )  $\nu$ : 3158, 2950, 1718, 1469, 1200; LRMS (ESI):  $m/z$  380  $[\text{M}+\text{Na}]^+$ ; HRMS (ESI):  $m/z$  calcd for  $\text{C}_{16}\text{H}_{14}\text{F}_3\text{NO}_3\text{SNa}$   $[\text{M}+\text{Na}]^+$  380.0539, Found 380.0547.

***N*-hydroxy-3-(3-oxo-3-(thiophen-2-yl)propoxy)-3-trifluoromethyl-isoindolinone (2ad)**

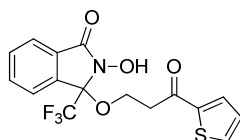

Starting material **1ad** (35.7 mg, 0.1 mmol) was oxygenated under condition A of section 2, and **2ad** (19.4 mg, 0.052 mmol) was isolated according to the purification procedure described in the General method (52% yield).

light yellow solid;  $^1\text{H}$  NMR (500 MHz,  $\text{CDCl}_3$ )  $\delta$ : 8.79 (brs, 1H), 7.88 (d, 1H,  $J = 7.4$  Hz), 7.79 (d, 1H,  $J = 4.0$  Hz), 7.72 (d, 1H,  $J = 5.2$  Hz), 7.60-7.69 (m, 3H), 7.14-7.17 (m, 1H), 3.75 (dt, 1H,  $J = 3.1$  Hz, 9.9 Hz), 3.39-3.49 (m, 2H), 3.10-3.37 (m, 1H);  $^{13}\text{C}$  NMR (126 MHz,  $\text{CDCl}_3$ )  $\delta$ : 191.3, 163.9, 143.1, 135.0, 134.0,

133.2, 133.0, 131.7, 130.5, 128.4, 124.2, 124.1, 121.8 (q,  $J = 286.7$  Hz), 90.6 (q,  $J = 33.6$  Hz), 58.0, 38.0;  $^{19}\text{F}$  NMR (369 MHz,  $\text{CDCl}_3$ )  $\delta$ :  $-78.1$ ; IR (KBr,  $\text{cm}^{-1}$ )  $\nu$ : 3178, 2959, 1741, 1637, 1418, 1197; LRMS (ESI):  $m/z$  394  $[\text{M}+\text{Na}]^+$ ; HRMS (ESI):  $m/z$  calcd for  $\text{C}_{16}\text{H}_{12}\text{F}_3\text{NO}_4\text{SNa}$   $[\text{M}+\text{Na}]^+$  394.0331, Found 394.0337.

***N*-benzyloxy-3-(3-(1-tosyl-1*H*-indol-3-yl)propoxy)-3-trifluoromethyl-isoindolinone (S4ae)**

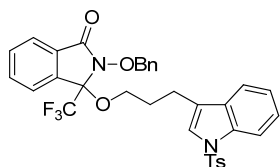

white solid;  $^1\text{H}$  NMR (400 MHz,  $\text{CDCl}_3$ )  $\delta$ : 7.97 (d, 1H,  $J = 8.5$  Hz), 7.88-7.93 (m, 1H), 7.71 (d, 2H,  $J = 8.5$  Hz), 7.53-7.70 (m, 5H), 7.34-7.43 (m, 4H), 7.27-7.33 (m, 1H), 7.25 (s, 1H), 7.15-7.22 (m, 3H), 5.35 (d, 1H,  $J = 9.7$  Hz), 5.14 (d, 1H,  $J = 9.7$  Hz), 3.26-3.35 (m, 1H), 2.96-3.04 (m, 1H), 2.63-2.79 (m, 2H), 2.31 (s, 3H), 1.81-2.00 (m, 2H);  $^{13}\text{C}$  NMR (100 MHz,  $\text{CDCl}_3$ )  $\delta$ : 165.6, 144.7, 135.2, 135.0, 134.5, 133.6, 131.7, 130.7, 129.8, 129.7, 129.3, 128.8, 128.4, 126.6, 124.6, 124.2, 124.1, 122.9, 122.6, 122.2 (q,  $J = 285.2$  Hz), 121.9, 119.3, 113.6, 90.8 (q,  $J = 32.9$  Hz), 79.1, 63.0, 28.1, 21.4, 20.9;  $^{19}\text{F}$  NMR (369 MHz,  $\text{CDCl}_3$ )  $\delta$ :  $-78.0$ ; IR (KBr,  $\text{cm}^{-1}$ )  $\nu$ : 3064, 2950, 1744, 1448, 1370, 1174; LRMS (ESI):  $m/z$  657  $[\text{M}+\text{Na}]^+$ ; HRMS (ESI):  $m/z$  calcd for  $\text{C}_{34}\text{H}_{29}\text{F}_3\text{N}_2\text{O}_5\text{SNa}$   $[\text{M}+\text{Na}]^+$  657.1642, Found 657.1631.

***N*-hydroxy-3-(3-(1-tosyl-1*H*-indol-3-yl)propoxy)-3-trifluoromethyl-isoindolinone (1ae)**

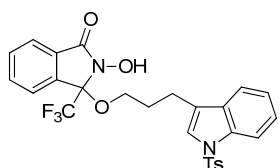

white solid;  $^1\text{H}$  NMR (500 MHz,  $\text{CDCl}_3$ )  $\delta$ : 9.84 (brs, 1H), 7.97 (d, 1H,  $J = 8.0$  Hz), 7.73 (d, 3H,  $J = 8.0$  Hz), 7.50-7.65 (m, 3H), 7.47 (d, 1H,  $J = 8.0$  Hz), 7.28-7.34 (m, 2H), 7.16-7.23 (m, 3H), 3.44-3.50 (m, 1H), 3.02-3.09 (m, 1H), 2.80 (t, 2H,  $J = 7.4$  Hz), 2.30 (s, 3H), 1.93-2.10 (m, 2H);  $^{13}\text{C}$  NMR (126 MHz,  $\text{CDCl}_3$ )  $\delta$ : 165.8, 144.7, 135.3, 135.2, 135.0, 133.4, 131.6, 130.8, 129.8, 126.7, 124.6, 124.0, 123.9, 122.9, 122.8, 122.0, 121.9 (q,  $J = 286.7$  Hz), 119.4, 113.6, 91.0 (q,  $J = 33.6$  Hz), 63.2, 28.2, 21.4, 21.0;  $^{19}\text{F}$  NMR (369 MHz,  $\text{CDCl}_3$ )  $\delta$ :  $-78.3$ ; IR (KBr,  $\text{cm}^{-1}$ )  $\nu$ : 3117, 2943, 1718, 1448, 1372, 1174; LRMS (ESI):  $m/z$  567  $[\text{M}+\text{Na}]^+$ ; HRMS (ESI):  $m/z$  calcd for  $\text{C}_{27}\text{H}_{23}\text{F}_3\text{N}_2\text{O}_5\text{SNa}$   $[\text{M}+\text{Na}]^+$  567.1172, Found 567.1165.

***N*-hydroxy-3-(3-oxo-3-(1-tosyl-1*H*-indol-3-yl)propoxy)-3-trifluoromethyl-isoindolinone (2ae)**

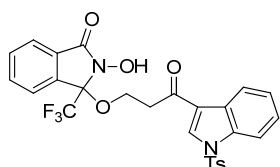

Starting material **1ae** (27.2 mg, 0.05 mmol) was oxygenated under condition A of section 2, and **2ae** (14.8 mg, 0.026 mmol) was isolated according to the purification procedure described in the General

method (53% yield).

light yellow solid;  $^1\text{H}$  NMR (500 MHz,  $\text{CDCl}_3$ )  $\delta$ : 9.04 (brs, 1H), 8.32 (s, 1H), 8.24 (d, 1H,  $J = 8.0$  Hz), 7.86-7.92 (m, 2H), 7.83 (d, 2H,  $J = 8.6$  Hz), 7.58-7.69 (m, 3H), 7.31-7.39 (m, 2H), 7.28 (d, 2H,  $J = 8.6$  Hz), 3.76-3.83 (m, 1H), 3.41-3.49 (m, 2H), 3.11-3.20 (m, 1H), 2.35 (s, 3H);  $^{13}\text{C}$  NMR (126 MHz,  $\text{CDCl}_3$ )  $\delta$ : 194.5, 163.7, 146.2, 134.7, 134.2, 133.9, 132.91, 132.89, 131.7, 130.6, 130.3, 127.2, 127.1, 126.0, 125.1, 124.2, 124.1, 123.0, 121.8 (q,  $J = 286.7$  Hz), 120.6, 113.0, 90.5 (q,  $J = 32.4$  Hz), 57.8, 38.3, 21.6;  $^{19}\text{F}$  NMR (369 MHz,  $\text{CDCl}_3$ )  $\delta$ : -78.0; IR (KBr,  $\text{cm}^{-1}$ )  $\nu$ : 3135, 2952, 1736, 1656, 1536, 1382, 1178; LRMS (ESI):  $m/z$  581  $[\text{M}+\text{Na}]^+$ ; HRMS (ESI):  $m/z$  calcd for  $\text{C}_{27}\text{H}_{21}\text{F}_3\text{N}_2\text{O}_6\text{SNa}$   $[\text{M}+\text{Na}]^+$  581.0965, Found 581.0978.

O-Bn-NHPI

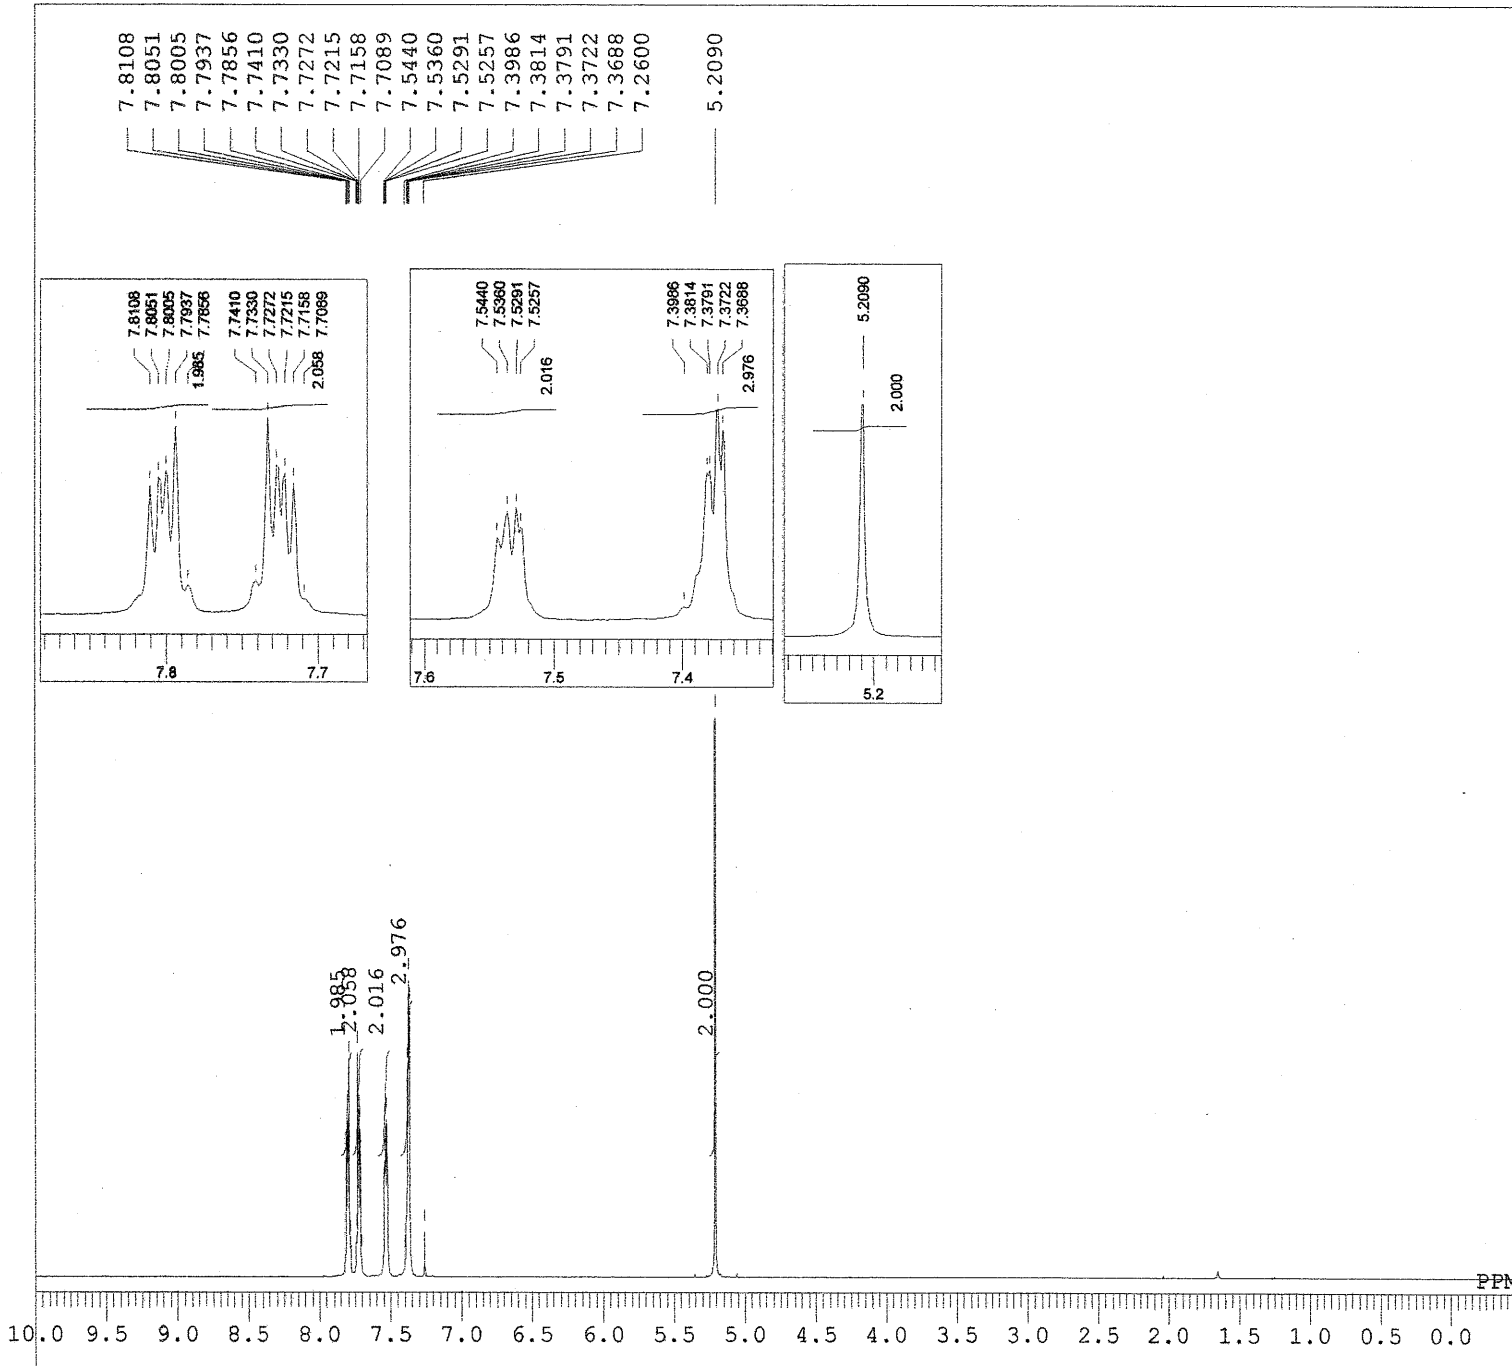

DFILE ozawa03-087\_1H.jdf  
COMNT O-Bn-NHPI  
DATIM 2014-01-31 16:45:47  
OBNUC 1H  
EXMOD proton.jxp  
OBFRQ 500.16 MHz  
OBSET 2.41 KHz  
OBFIN 6.01 Hz  
POINT 16384  
FREQU 9384.38 Hz  
SCANS 4  
ACQTM 1.7459 sec  
PD 5.0000 sec  
PW1 5.55 usec  
IRNUC 1H  
CTEMP 21.7 c  
SLVNT CDCL3  
EXREF 7.26 ppm  
BF 1.00 Hz  
RGAIN 34

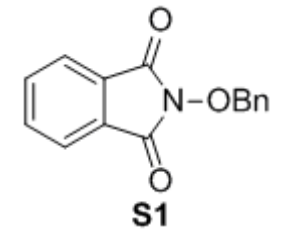

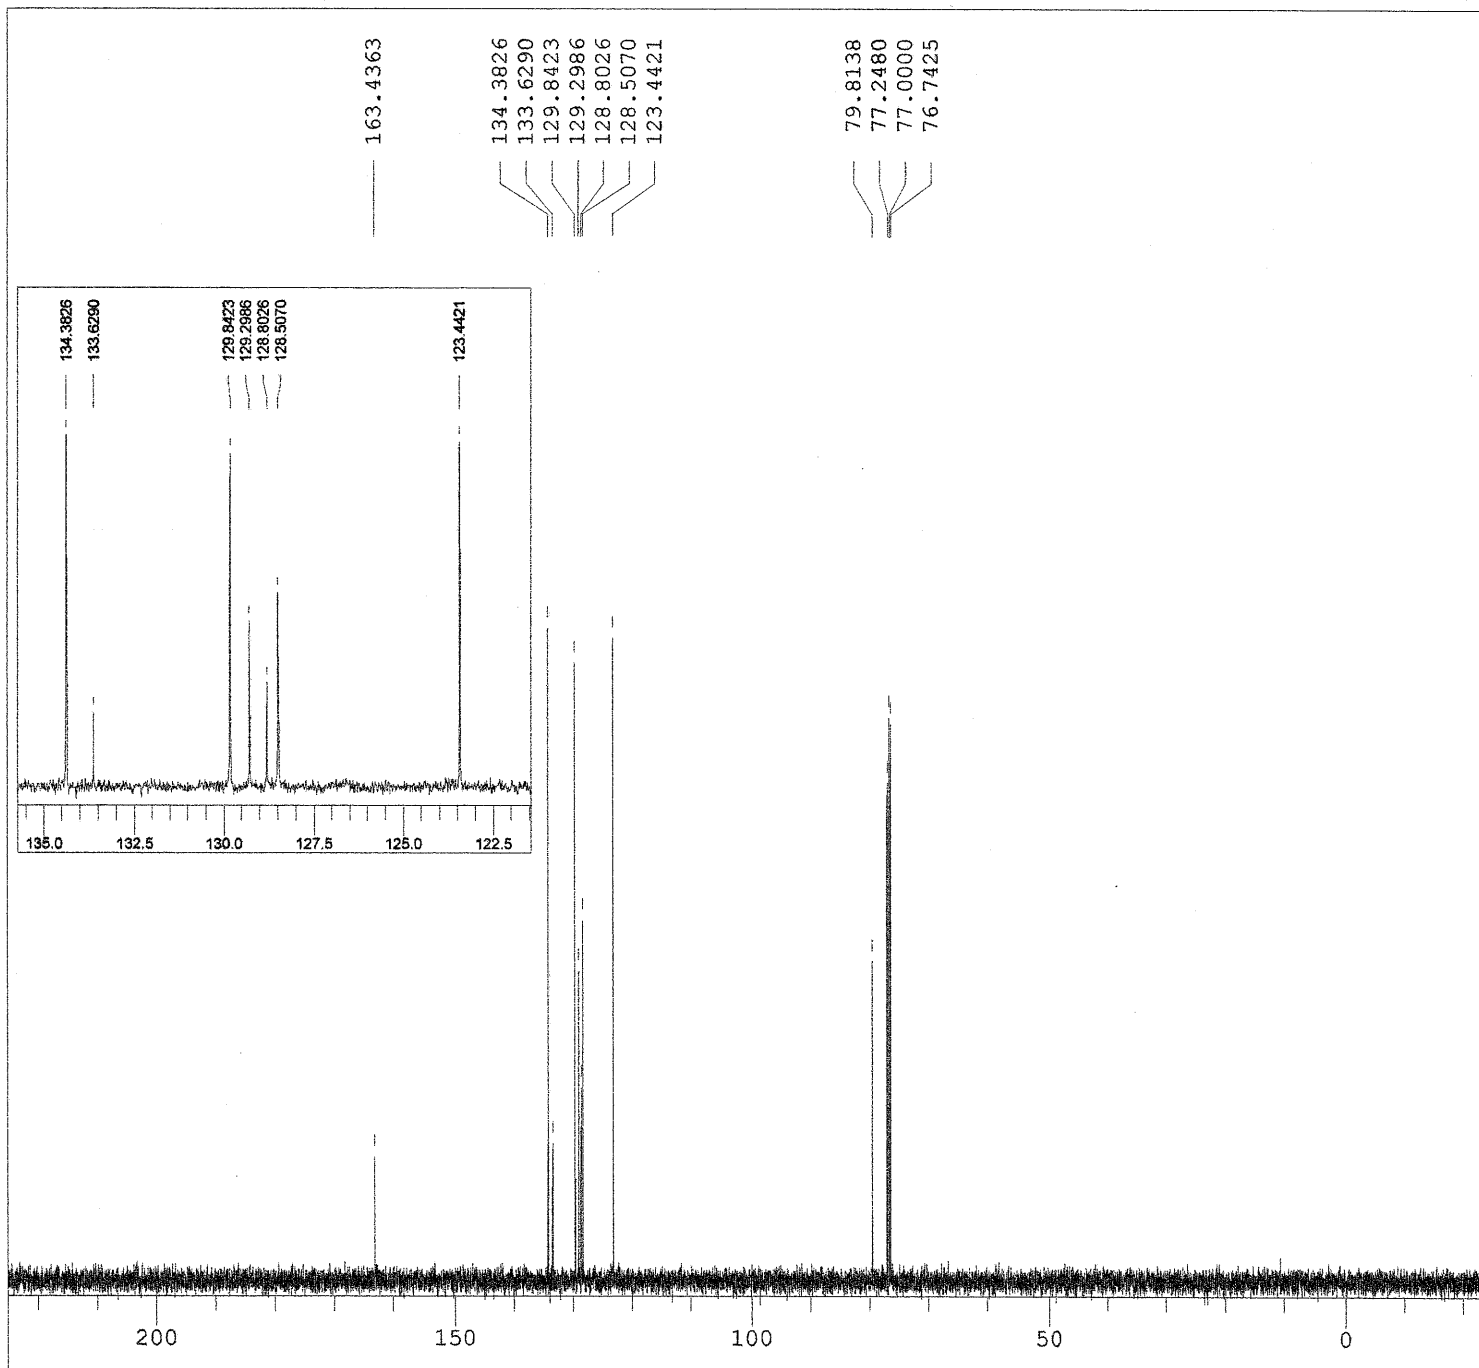

DFILE ozawa03-087\_13C.jdf  
COMNT O-Bn-NHPI  
DATIM 2014-01-31 16:46:51  
OBNUC 13C  
EXMOD carbon.jxp  
OBFRQ 125.77 MHz  
OBSET 7.87 KHz  
OBFIN 4.21 Hz  
POINT 32767  
FREQU 39308.18 Hz  
SCANS 20  
ACQTM 0.8336 sec  
PD 3.0000 sec  
PW1 3.40 usec  
IRNUC 1H  
CTEMP 21.7 c  
SLVNT CDCL3  
EXREF 77.00 ppm  
BF 1.00 Hz  
RGAIN 60

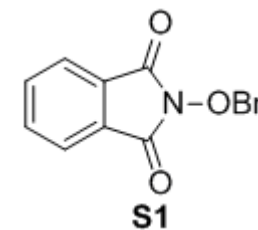

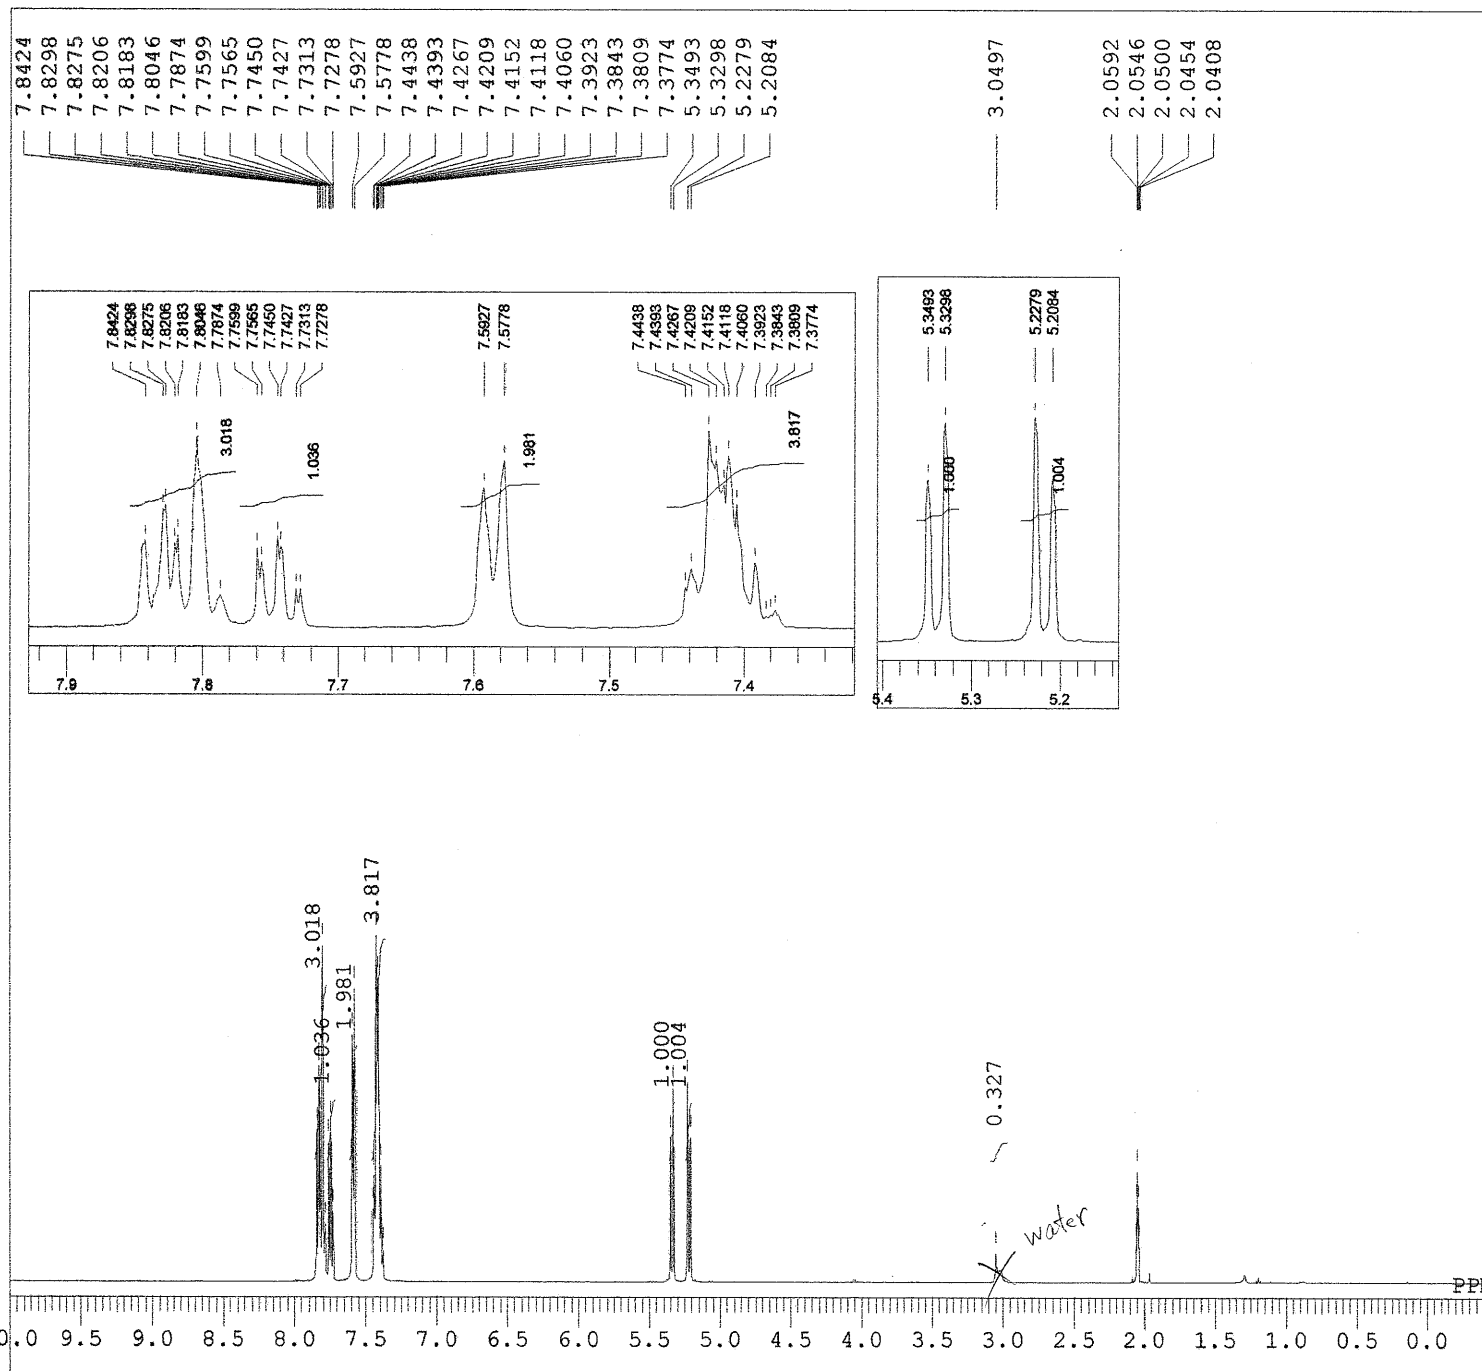

```

DFILE  ozawa04-026_1H.jdf
COMNT  S2, CF3-OH
DATIM  2014-01-31 21:15:49
OBNUC  1H
EXMOD  proton.jxp
OBFRQ   500.16 MHz
OBSET   2.41 KHz
OBFIN   6.01 Hz
POINT   16384
FREQU   9384.38 Hz
SCANS    4
ACQTM   1.7459 sec
PD       5.0000 sec
PW1     5.55 usec
IRNUC   1H
CTEMP   21.7 c
SLVNT   ACETN
EXREF   2.05 ppm
BF       0.12 Hz
RGAIN   32
    
```

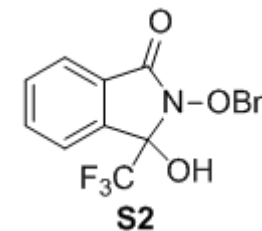

S2, CF3-OH

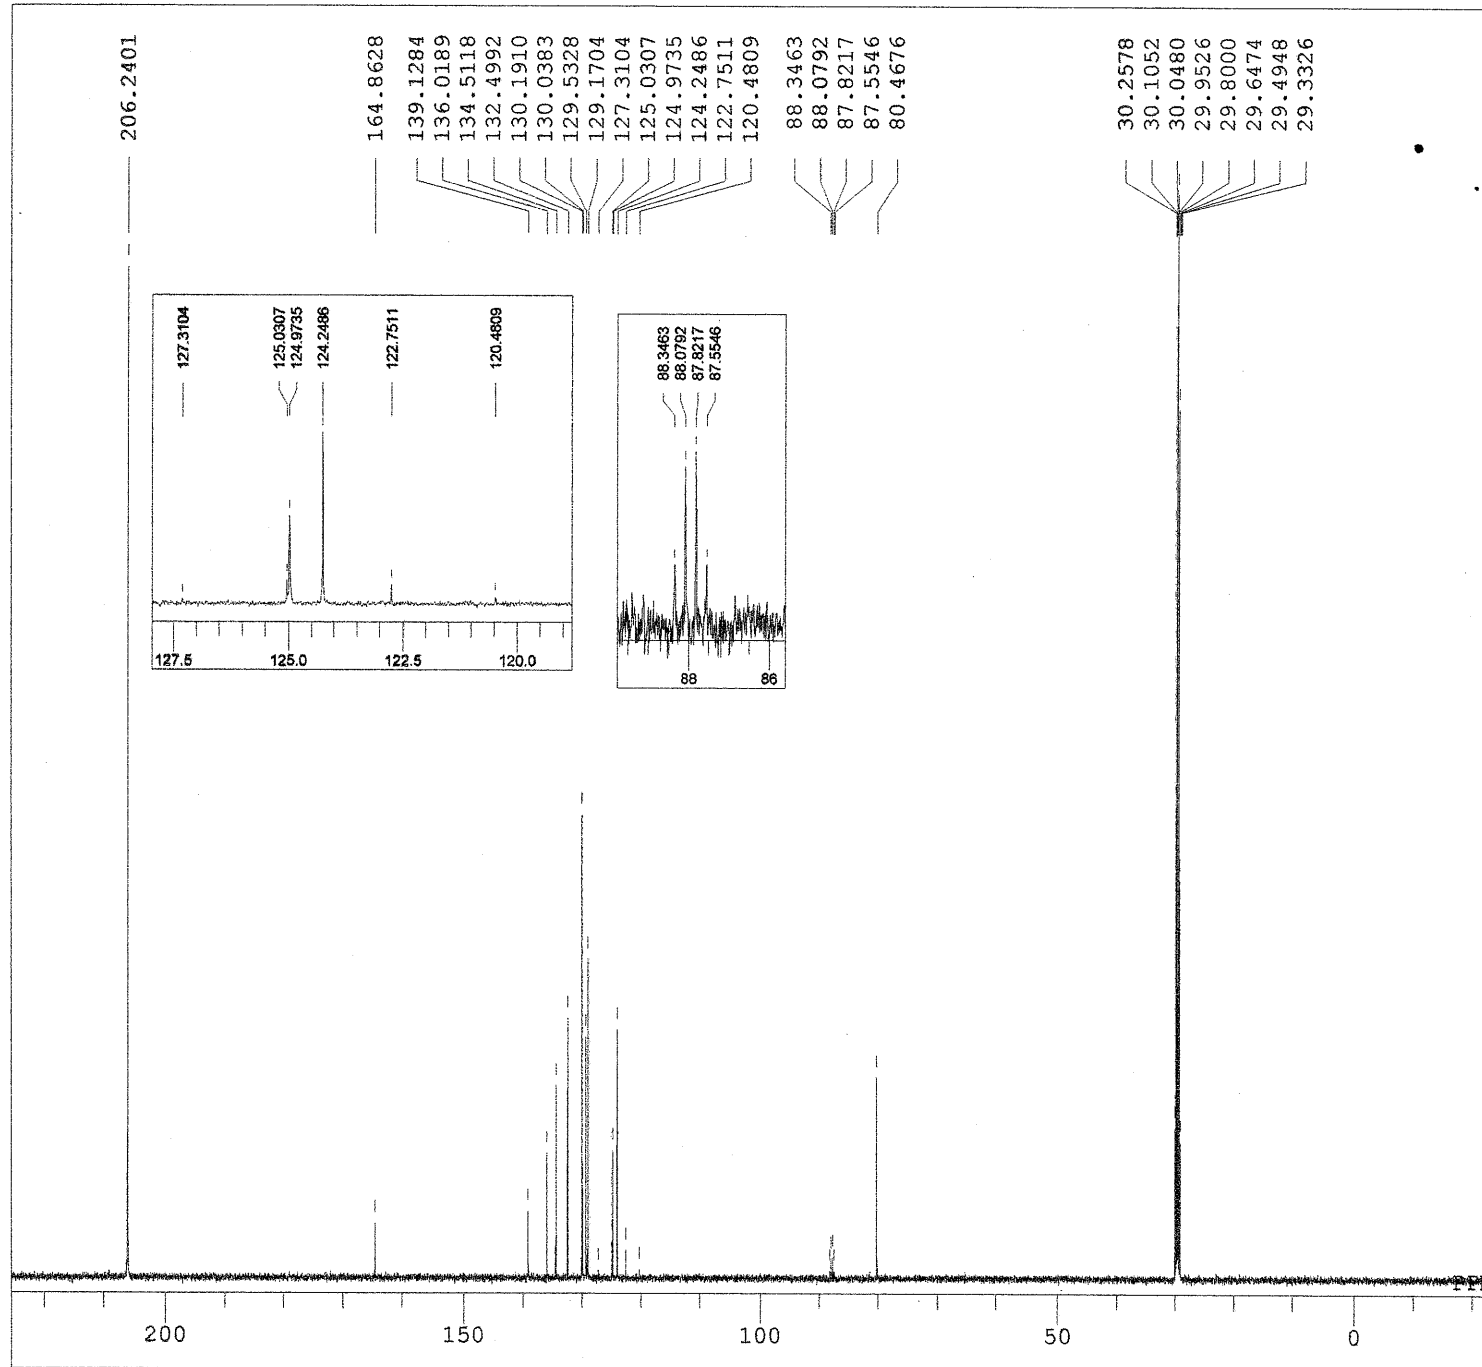

DFILE ozawa04-026\_13C.jdf  
COMNT S2, CF3-OH  
DATIM 2014-01-31 21:16:52  
OBNUC 13C  
EXMOD carbon.jxp  
OBFRQ 125.77 MHz  
OBSET 7.87 KHz  
OBFIN 4.21 Hz  
POINT 32767  
FREQU 39308.18 Hz  
SCANS 176  
ACQTM 0.8336 sec  
PD 3.0000 sec  
PW1 3.40 usec  
IRNUC 1H  
CTEMP 22.1 c  
SLVNT ACETN  
EXREF 29.80 ppm  
BF 1.00 Hz  
RGAIN 60

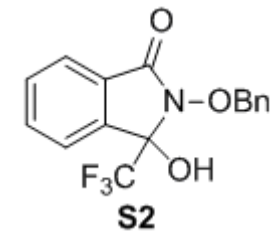



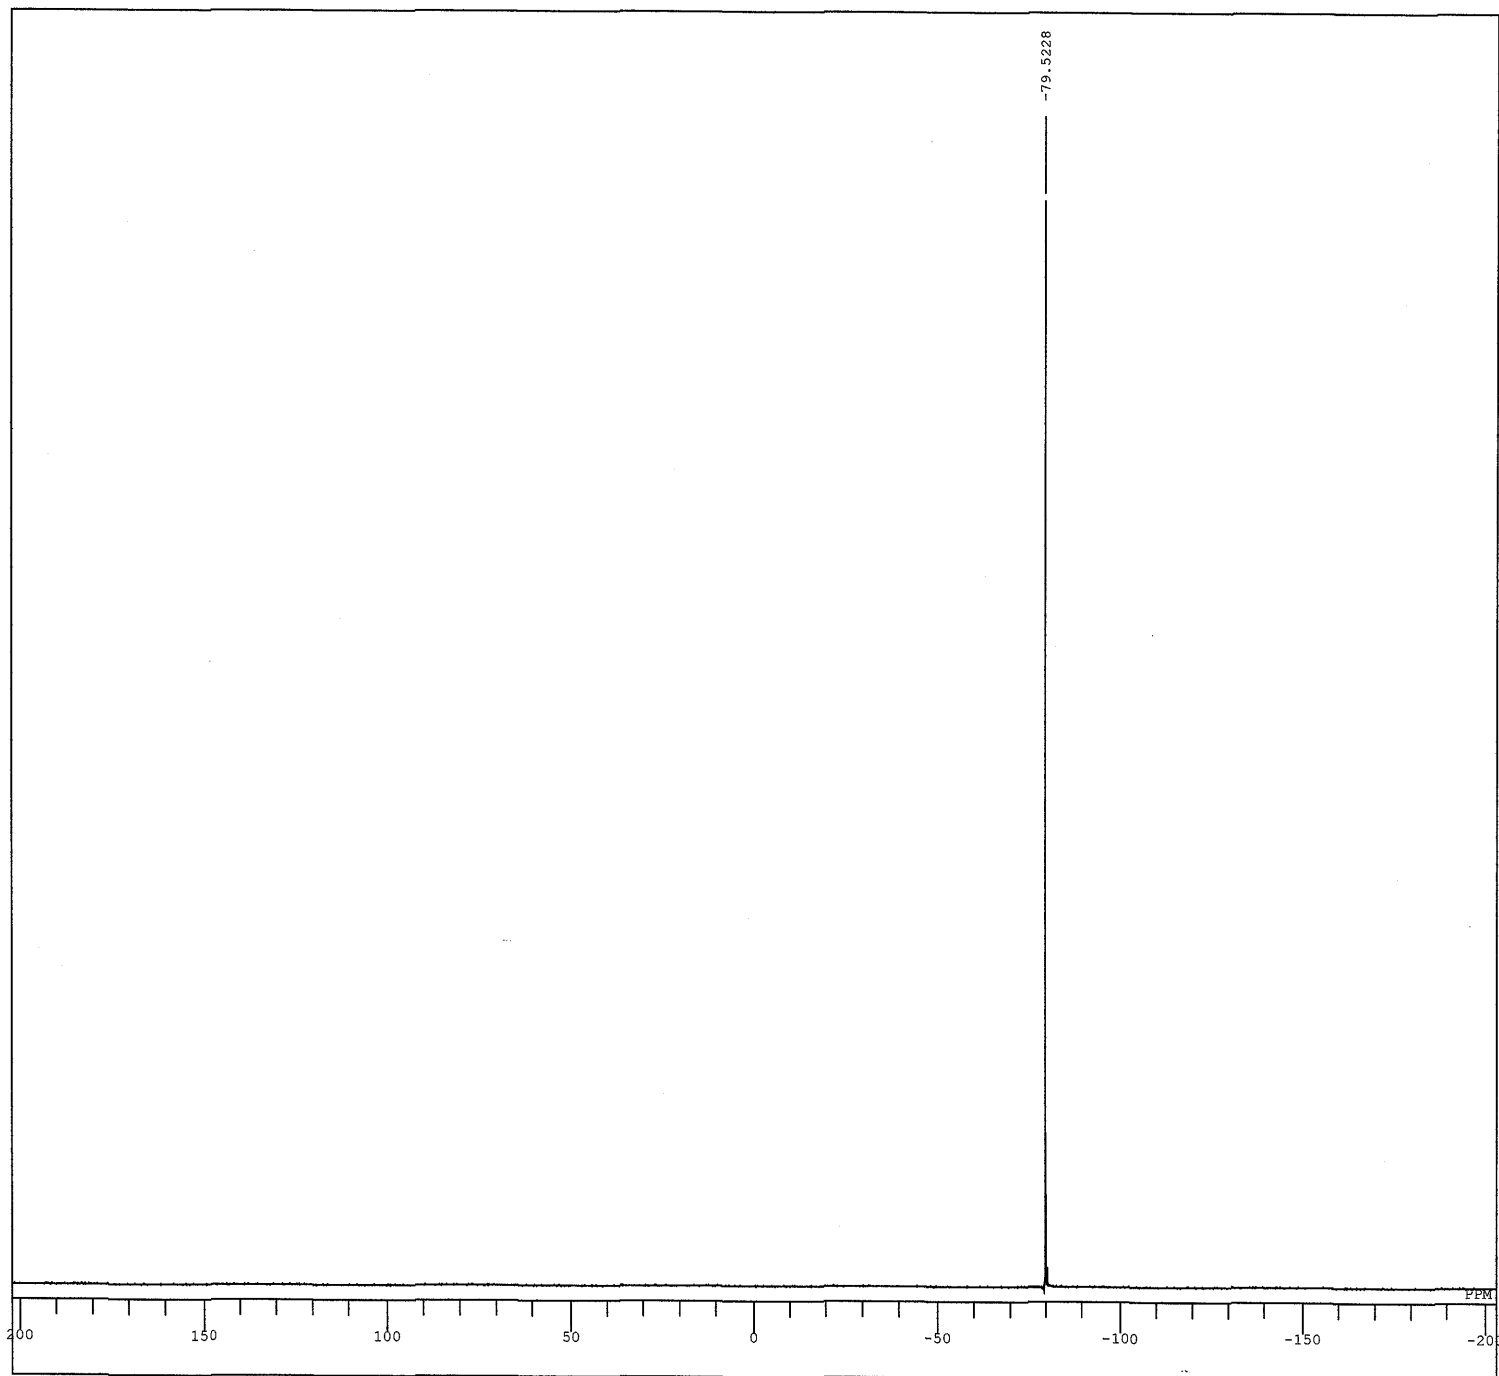

DFILE ozawa04-026\_19F.jdf  
COMNT S2, CF3-OH  
DATIM 31-01-2014 20:52:12  
OBNUC 19F  
EXMOD proton.jxp  
OBFRO 368.64 MHz  
OBSFET 7.63 KHz  
OBFIN 2.85 Hz  
POINT 16384  
FREQU 186567.17 Hz  
SCANS 4  
ACQTM 0.0878 sec  
PD 5.0000 sec  
PWL 3.90 usec  
IRNUC 19F  
CTEMP 21.3 c  
SLVNT ACETN  
EXREF -164.90 ppm  
BF 0.12 Hz  
RGAIN 46

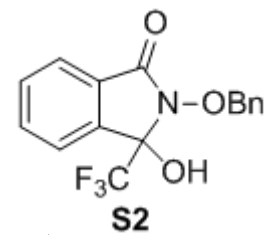

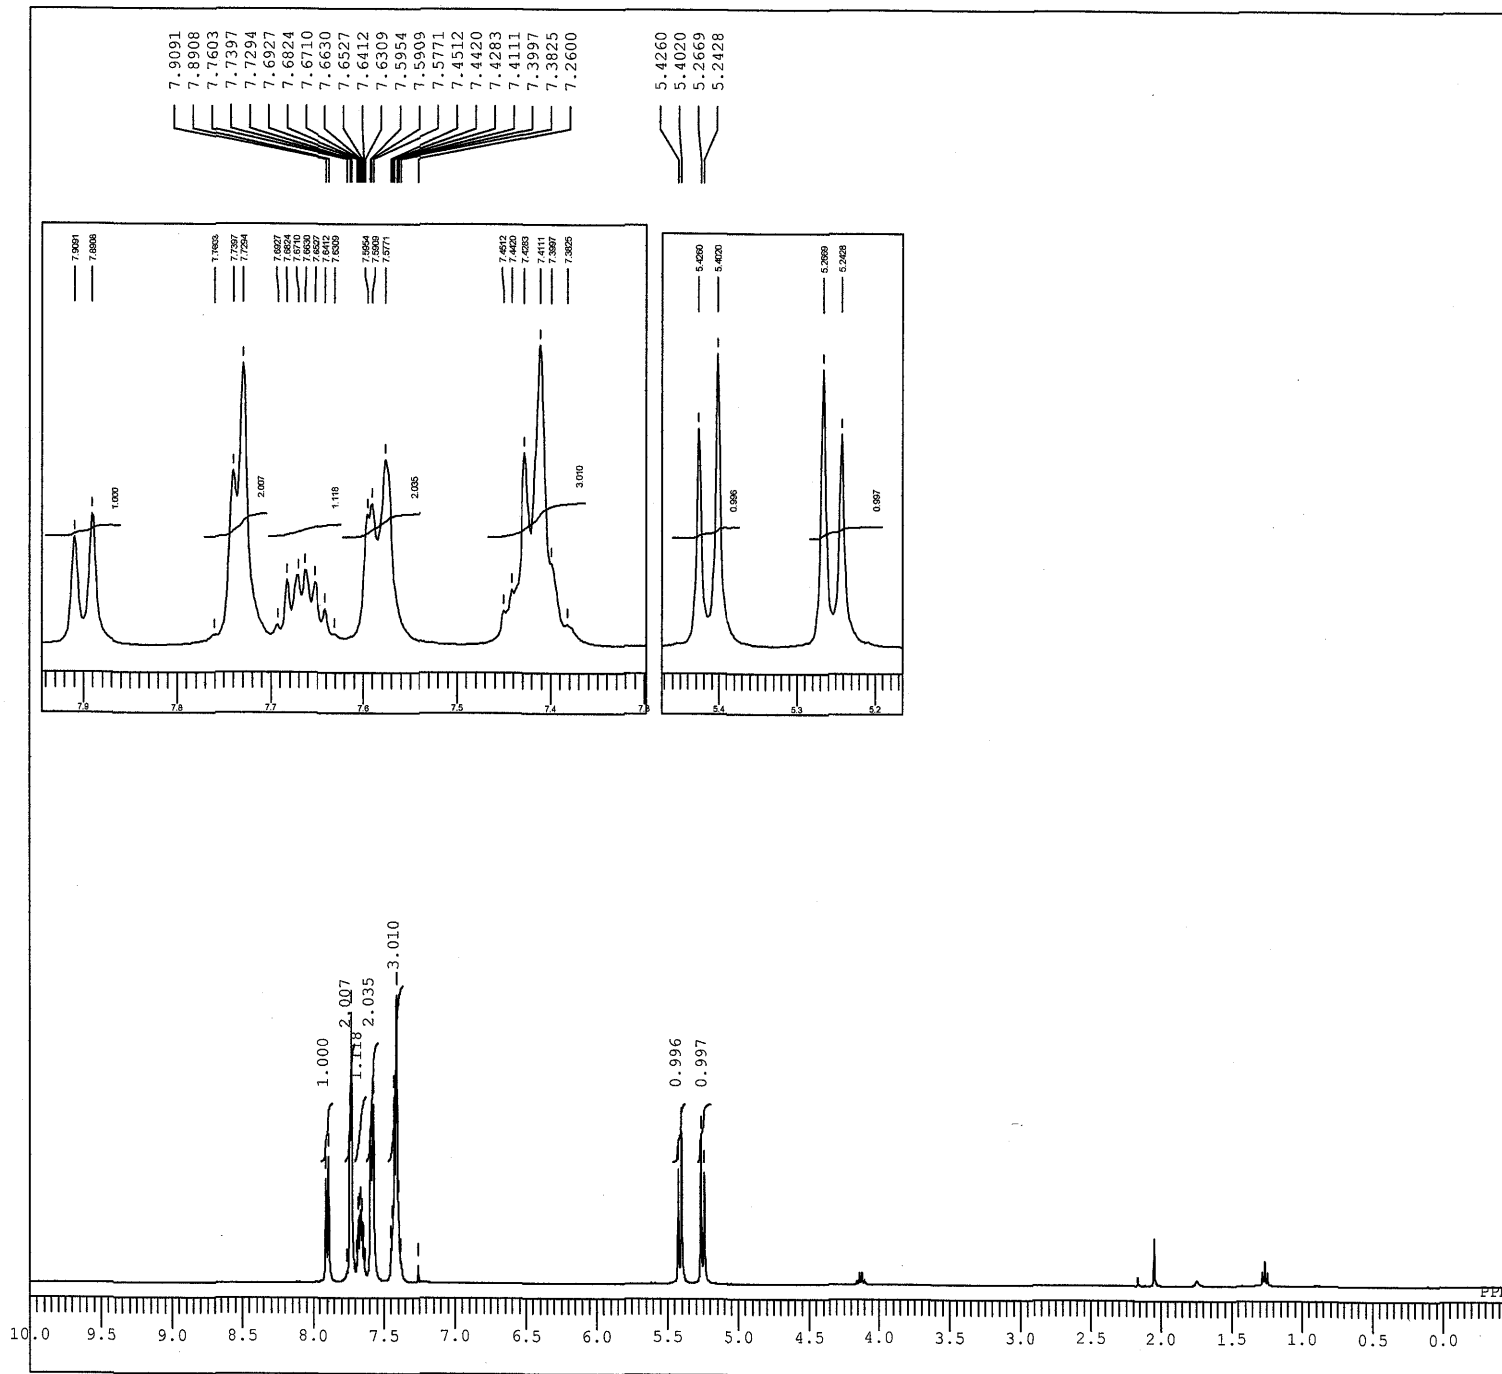

DFILE ozawa04-131\_1h.jdf  
 COMNT S3, CF3-C1  
 DATIM 11-02-2014 20:18:48  
 OBNUC 1H  
 EXMOD proton.jxp  
 OBFREQ 391.78 MHz  
 OBSET 8.51 KHz  
 OBFIN 3.34 Hz  
 POINT 16384  
 FREQU 7348.62 Hz  
 SCANS 4  
 ACQTM 2.2295 sec  
 PD 5.0000 sec  
 PW1 5.25 usec  
 IRNUC 1H  
 CTEMP 21.1 c  
 SLVNT CDCL3  
 EXREF 7.26 ppm  
 BF 1.00 Hz  
 RGAIN 28

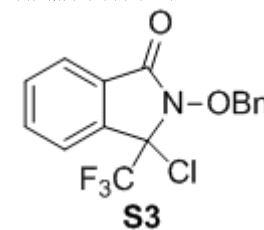

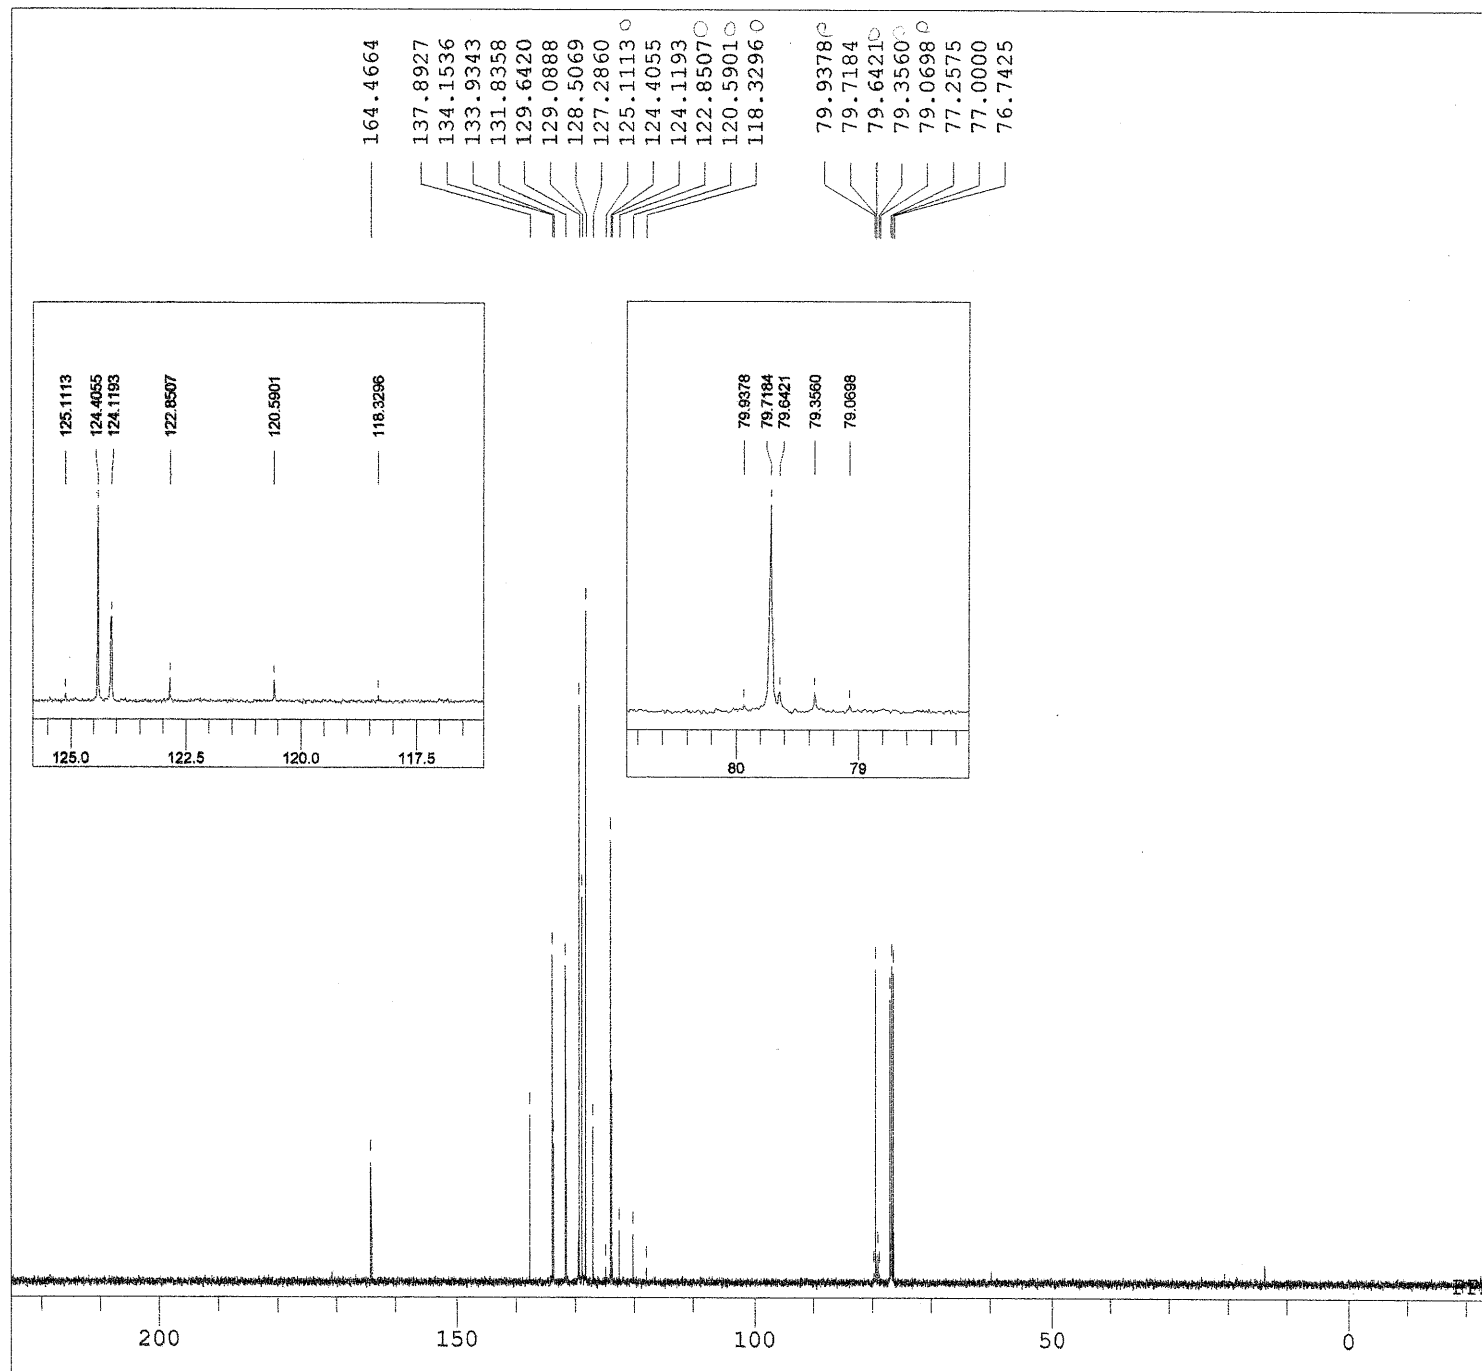

DFILE ozawa04-131\_13C.jdf  
 COMNT S3, CF3-C1  
 DATIM 2014-02-11 20:50:43  
 OBNUC 13C  
 EXMOD carbon.jxp  
 OBFRQ 125.77 MHz  
 OBSET 7.87 KHz  
 OBFIN 4.21 Hz  
 POINT 32767  
 FREQU 39308.18 Hz  
 SCANS 84  
 ACQTM 0.8336 sec  
 PD 3.0000 sec  
 PW1 3.40 usec  
 IRNUC 1H  
 CTEMP 21.6 c  
 SLVNT CDCL3  
 EXREF 77.00 ppm  
 BF 1.00 Hz  
 RGAIN 60

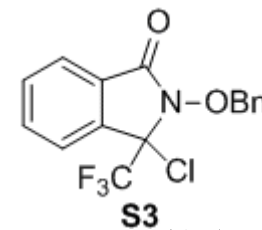

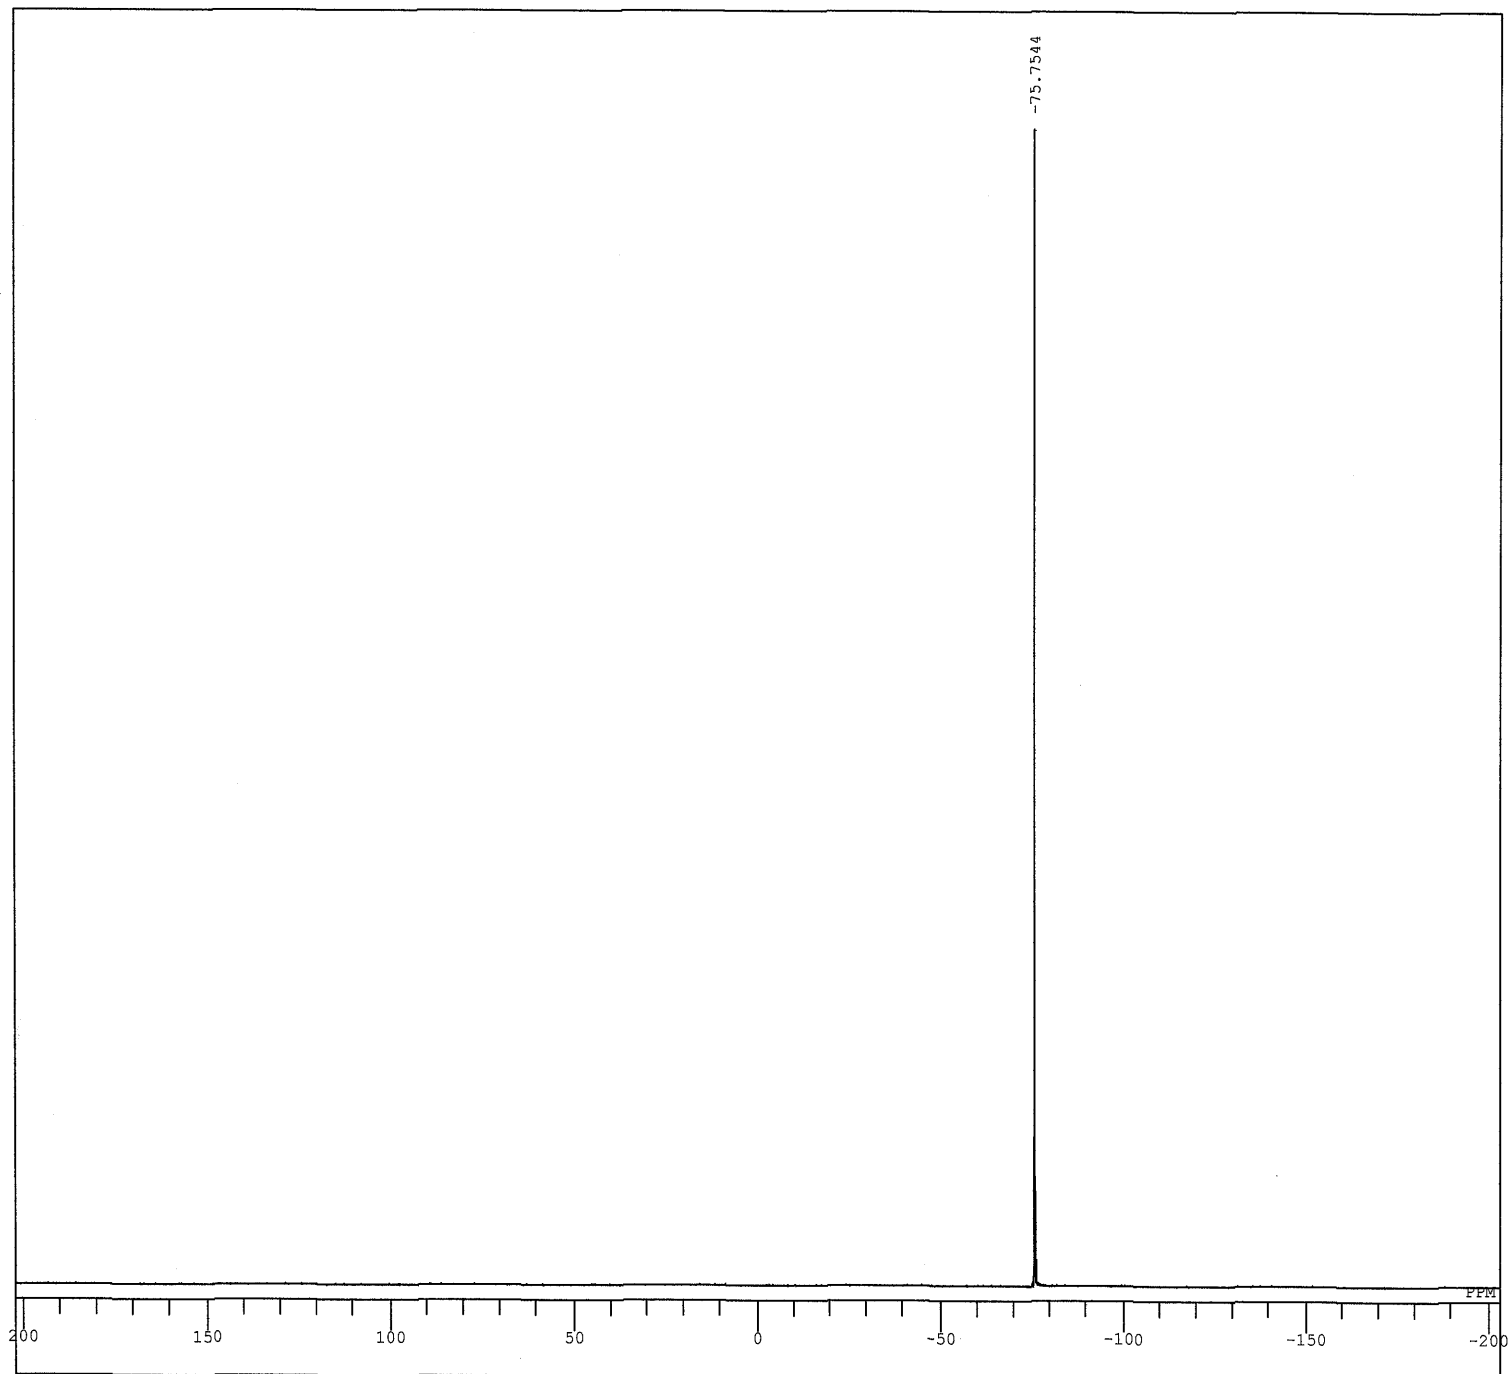

DFILE ozawa04-131\_19F.jdf  
COMNT S3, CF3-C1  
DATIM 11-02-2014 20:16:32  
OBNUC 19F  
EXMOD proton.jxp  
OBFRQ 368.64 MHz  
OBSET 7.63 KHz  
OBFIN 2.85 Hz  
POINT 16384  
FREQU 186567.17 Hz  
SCANS 4  
ACQTM 0.0878 sec  
PD 5.0000 sec  
PWL 3.90 usec  
IRNUC 19F  
CTEMP 20.9 c  
SLVNT CDCL3  
EXREF -164.90 ppm  
BF 1.00 Hz  
RGAIN 44

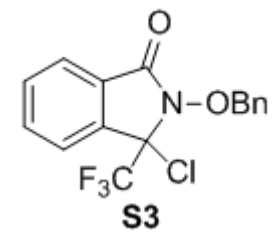

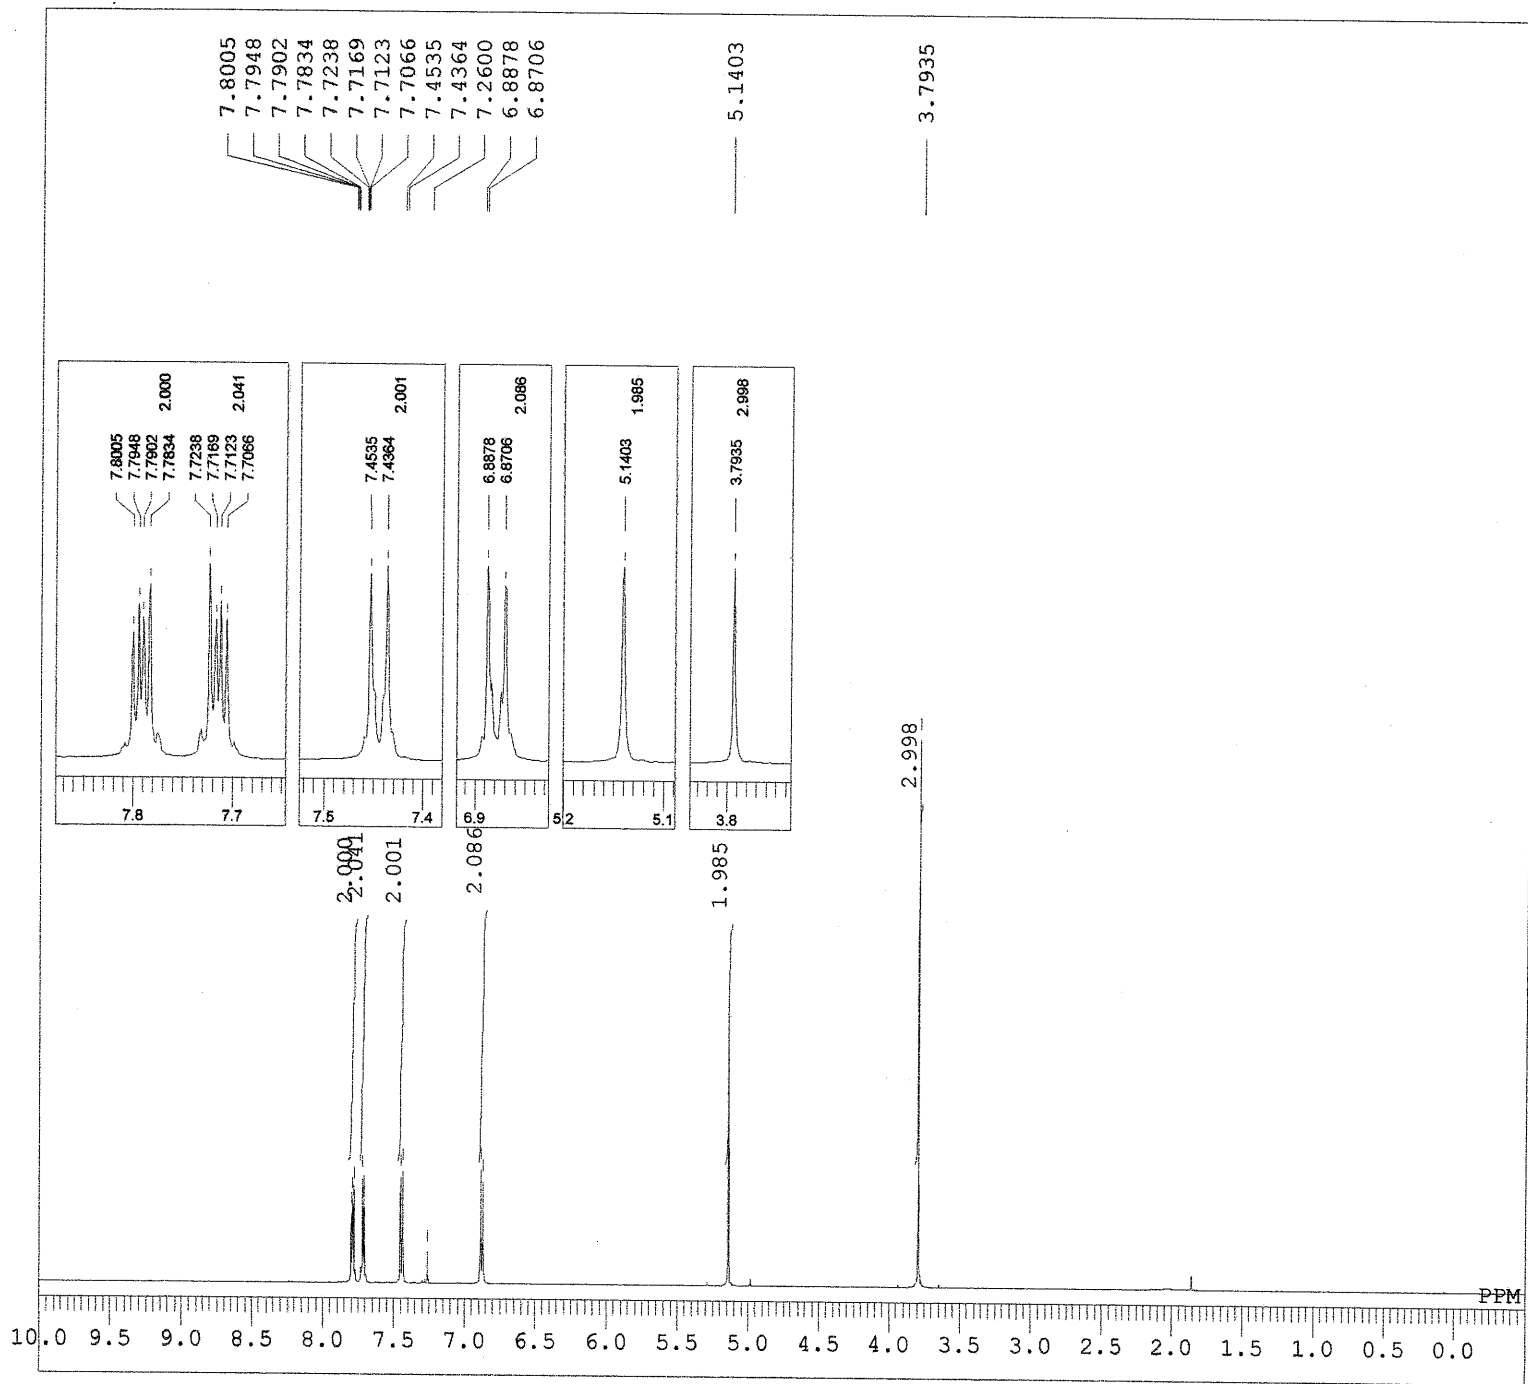

DFILE Ta02-134\_1H.jdf  
 COMNT PMB-NHPI  
 DATIM 2014-08-16 15:28:57  
 OBNUC 1H  
 EXMOD proton.jxp  
 OBFREQ 500.16 MHz  
 OBSET 2.41 KHz  
 OBFIN 6.01 Hz  
 POINT 16384  
 FREQU 9384.38 Hz  
 SCANS 4  
 ACQTM 1.7459 sec  
 PD 5.0000 sec  
 PW1 5.55 usec  
 IRNUC 1H  
 CTEMP 26.3 c  
 SLVNT CDCL3  
 EXREF 7.26 ppm  
 BF 0.12 Hz  
 RGAIN 36

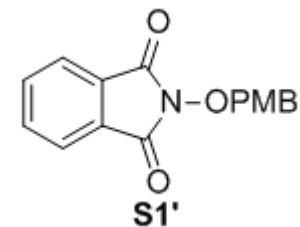

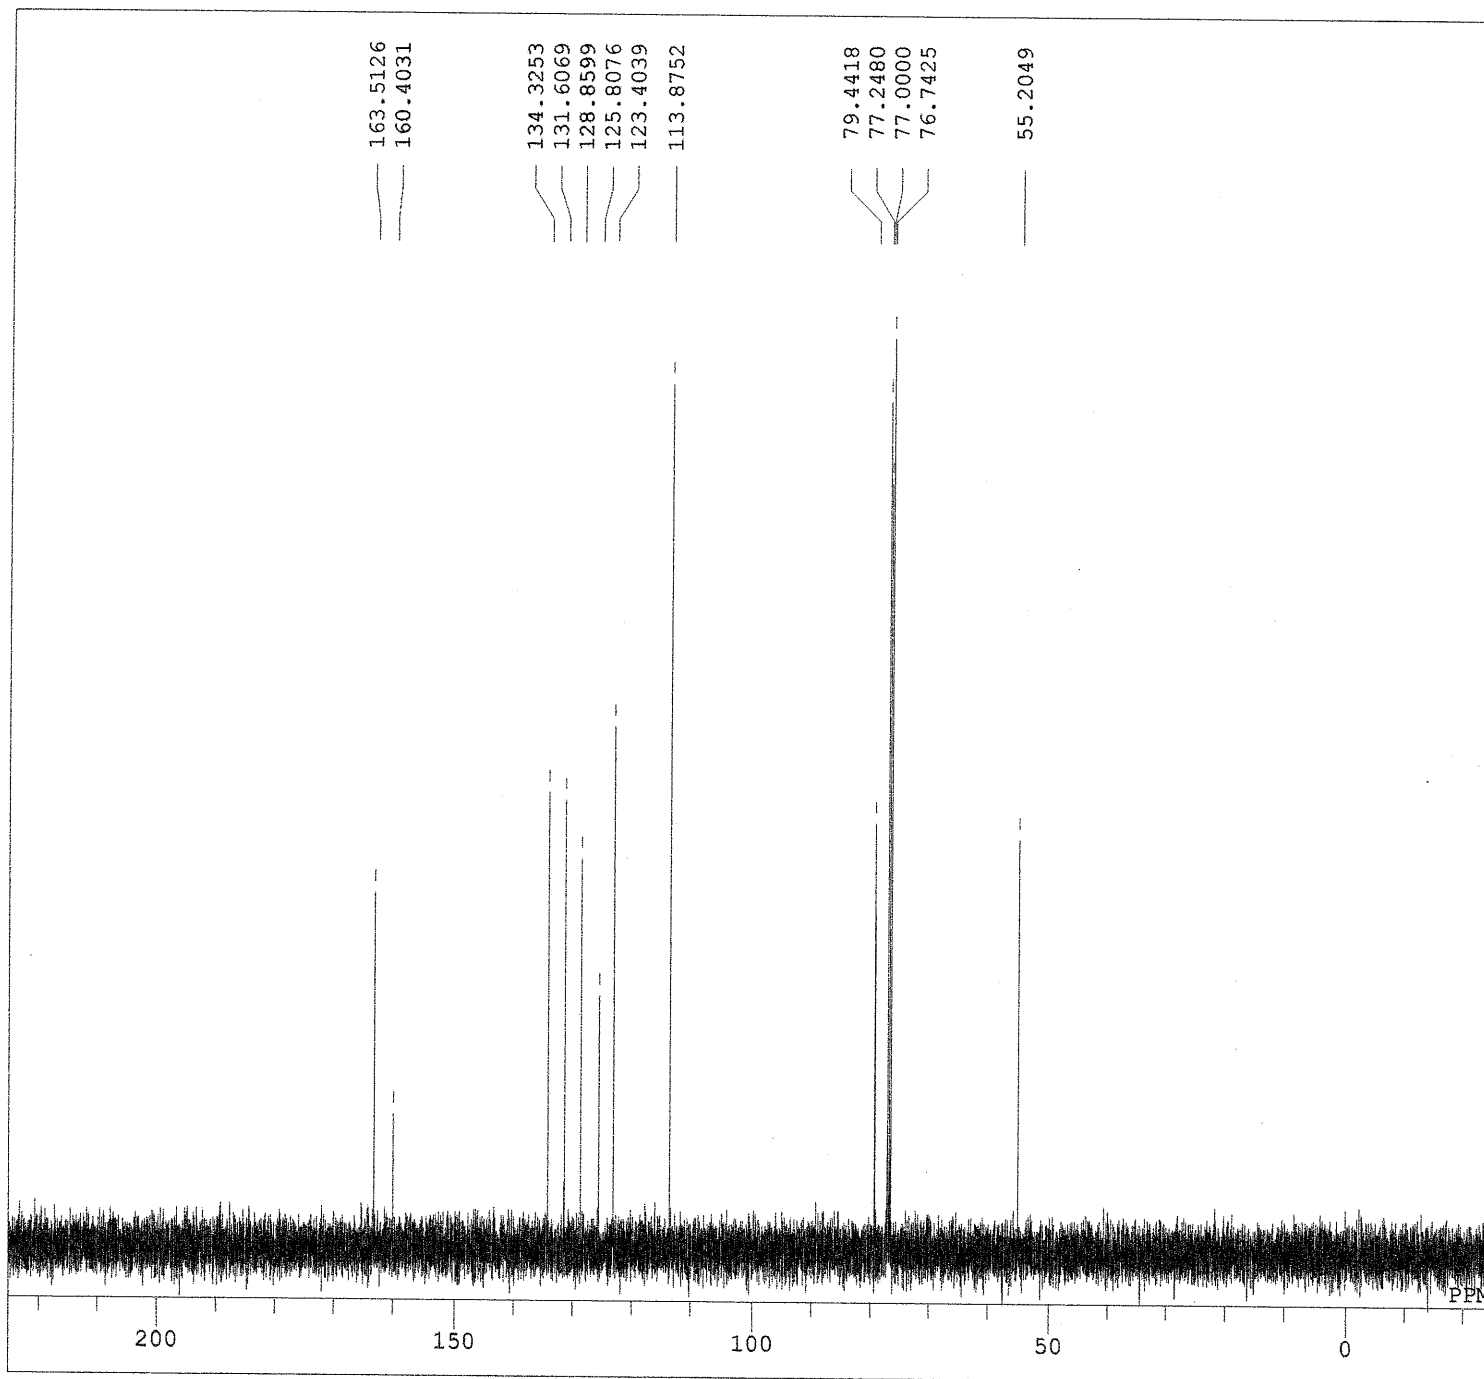

```

DFILE Ta02-134_13C-.jdf
COMNT PMB-NHPI
DATIM 2014-08-16 15:30:00
OBNUC 13C
EXMOD carbon.jxp
OBFRQ 125.77 MHz
OBSET 7.87 KHz
OBFIN 4.21 Hz
POINT 32767
FREQU 39308.18 Hz
SCANS 20
ACQTM 0.8336 sec
PD 3.0000 sec
PW1 3.40 usec
IRNUC 1H
CTEMP 26.5 c
SLVNT CDCL3
EXREF 77.00 ppm
BF 0.12 Hz
RGAIN 60
    
```

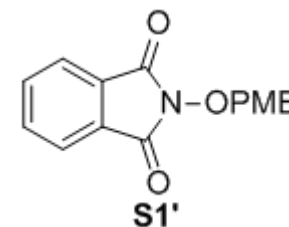

```

DFILE  ozawa05-028_1H.als
COMNT  FMB, CF3
DATIM  2014-06-04 19:09:38
OBNUC  1H
EXMOD  proton.jxp
OBFRQ  500.16 MHz
OBSET  2.41 KHz
OBFIN  6.01 Hz
POINT  13107
FREQU  7507.51 Hz
SCANS  4
ACQTM  1.7459 sec
PD      5.0000 sec
PW1     5.55 usec
IRNUC  1H
CTEMP  25.2 c
SLVNT  ACETN
EXREF  2.05 ppm
BF      0.12 Hz
RGAIN  30
    
```

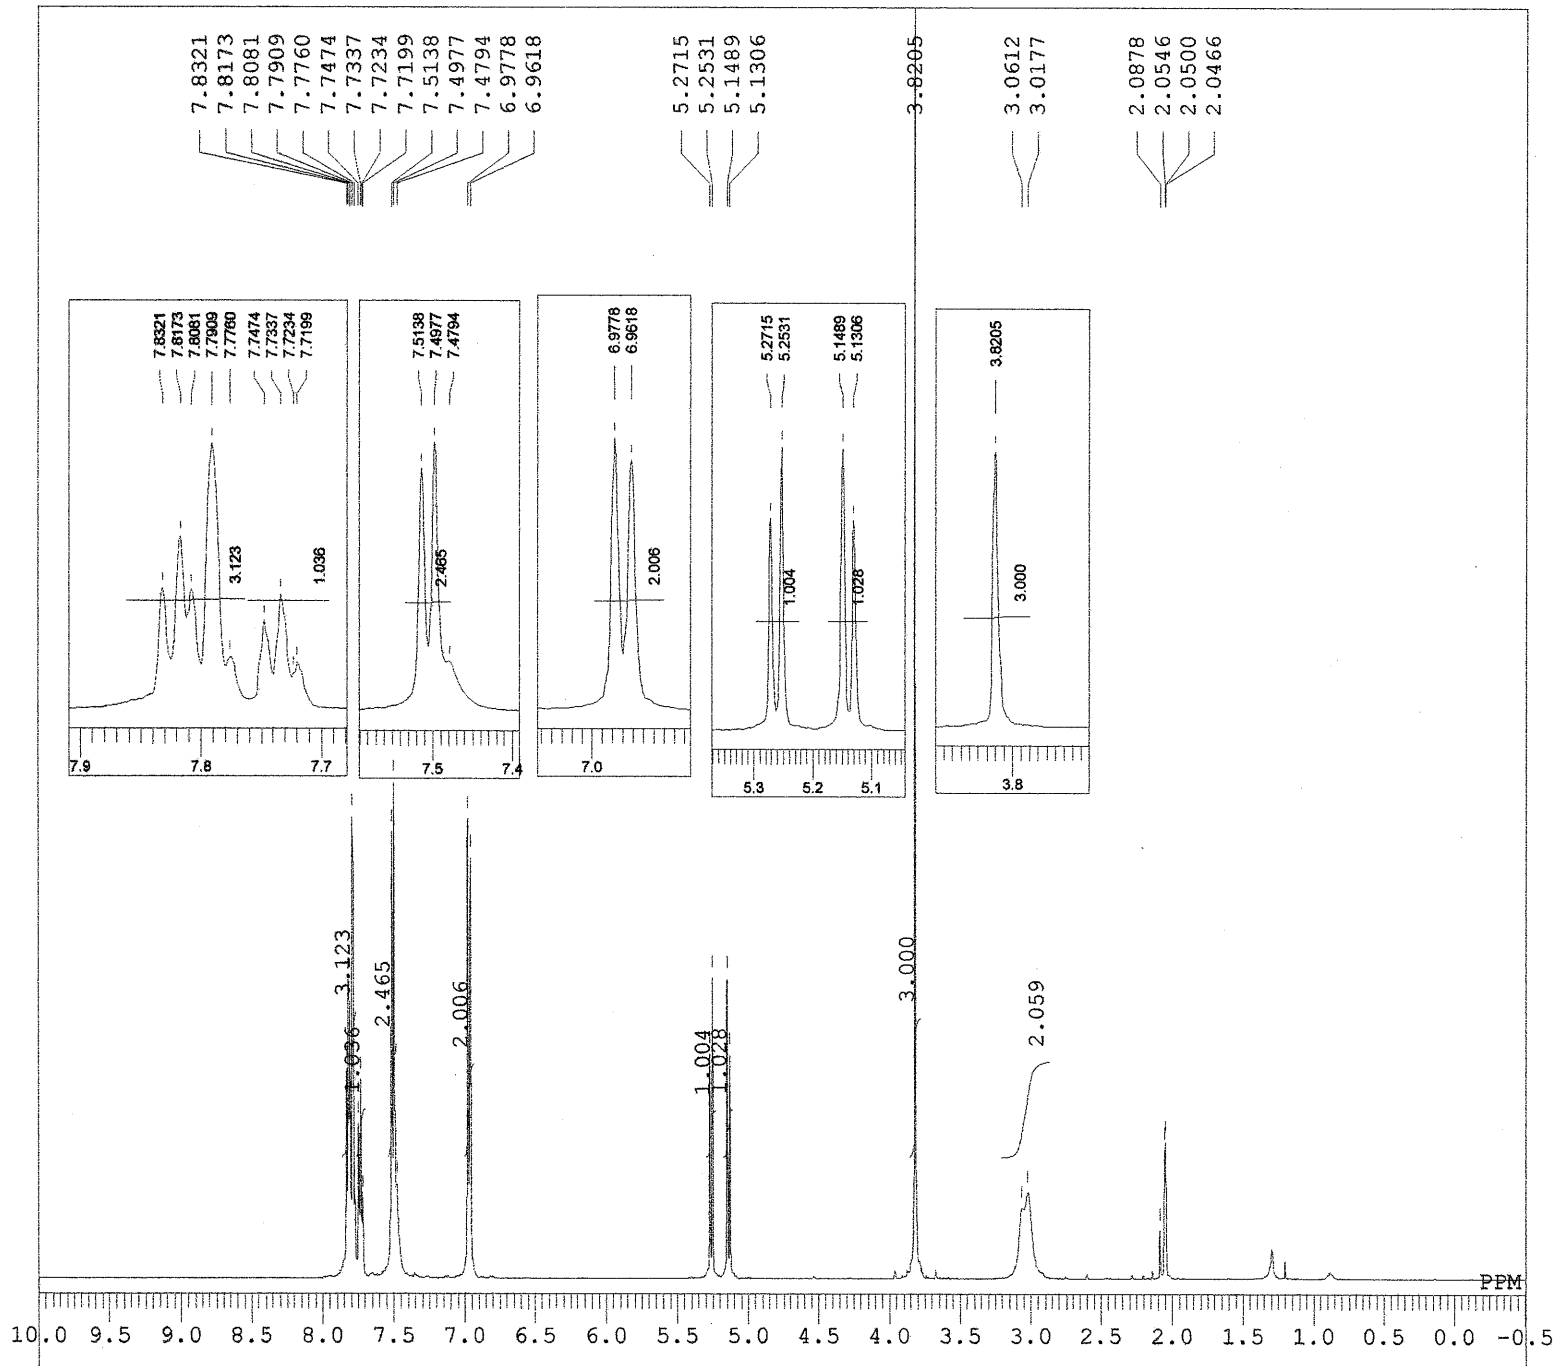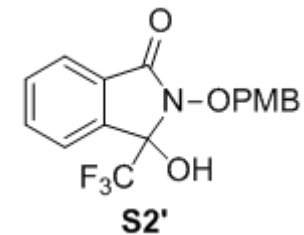

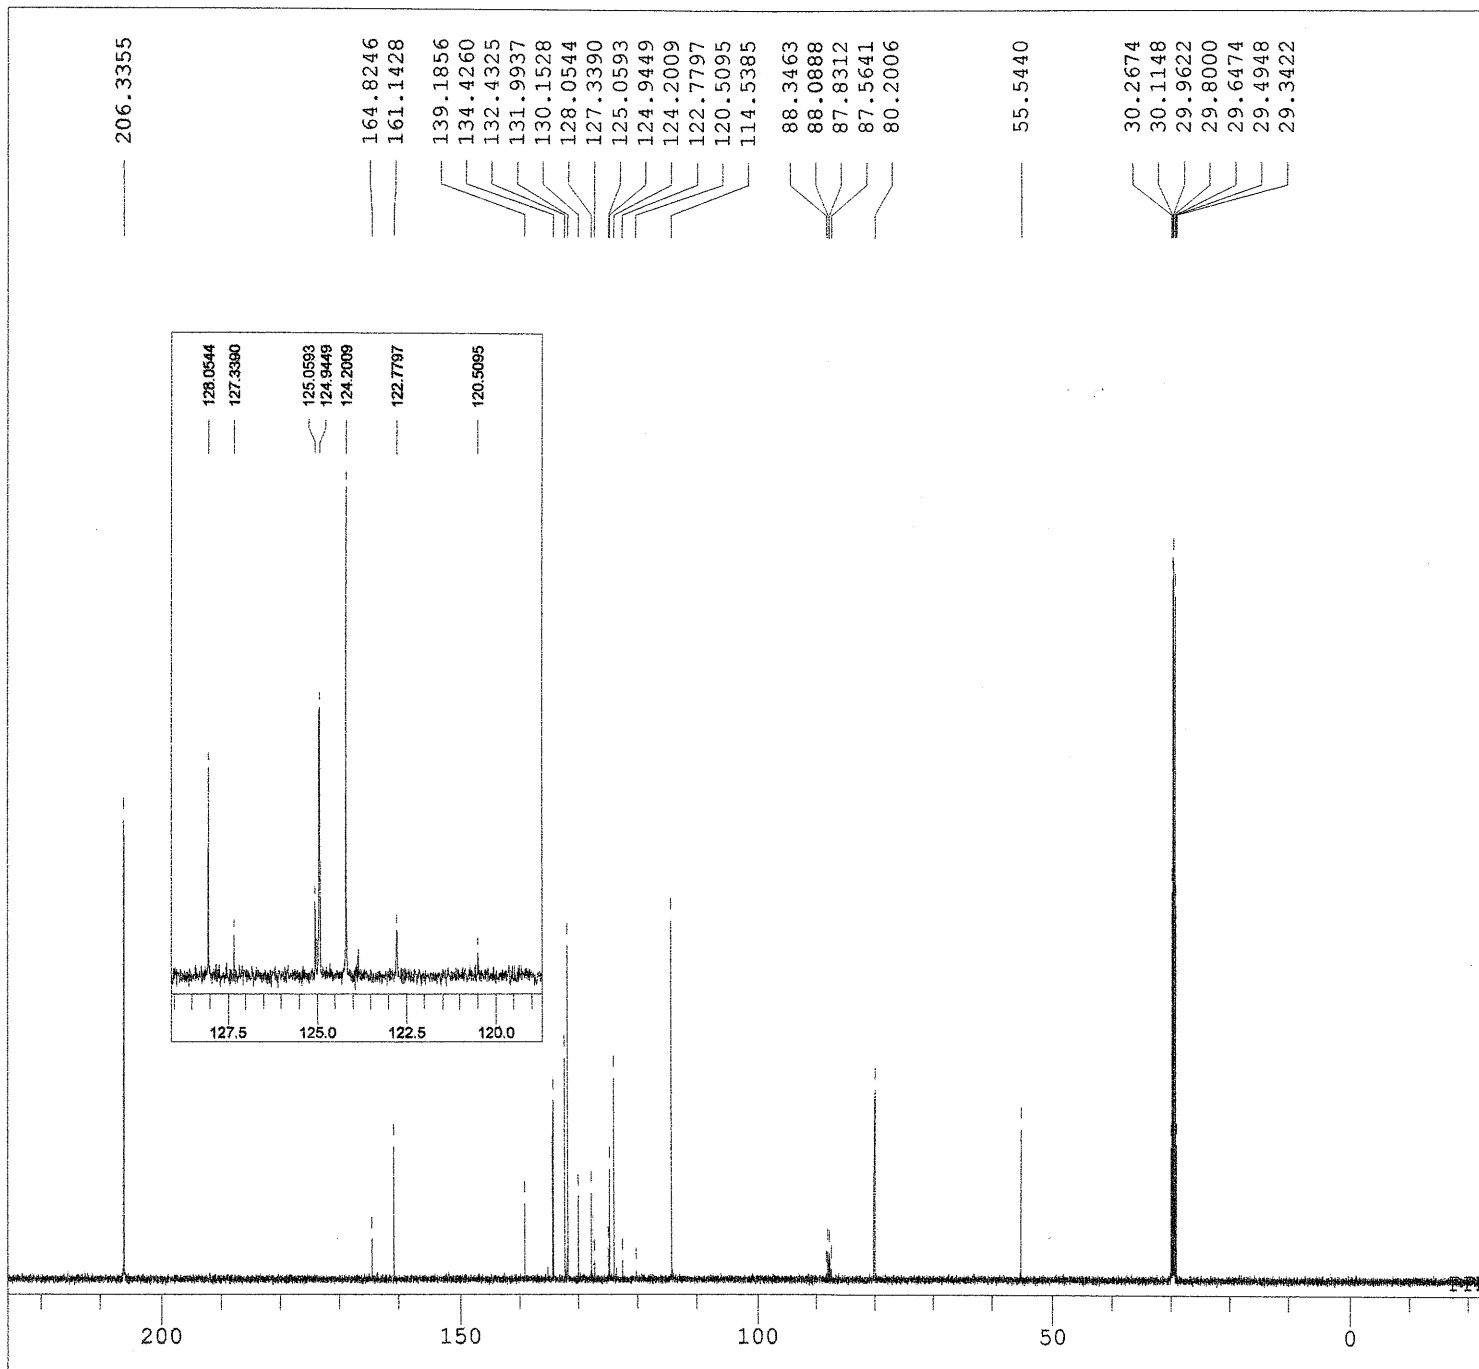

```

DFILE ozawa05-028_13C.jdf
COMNT PMB, CF3
DATIM 2014-06-04 19:10:42
OBNUC 13C
EXMOD carbon.jxp
OBFRQ 125.77 MHz
OBSET 7.87 KHz
OBFIN 4.21 Hz
POINT 32767
FREQU 39308.18 Hz
SCANS 292
ACQTM 0.8336 sec
PD 3.0000 sec
PW1 3.40 usec
IRNUC 1H
CTEMP 25.9 c
SLVNT ACETN
EXREF 29.80 ppm
BF 0.12 Hz
RGAIN 60
    
```

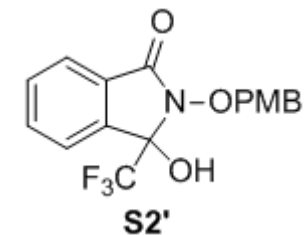



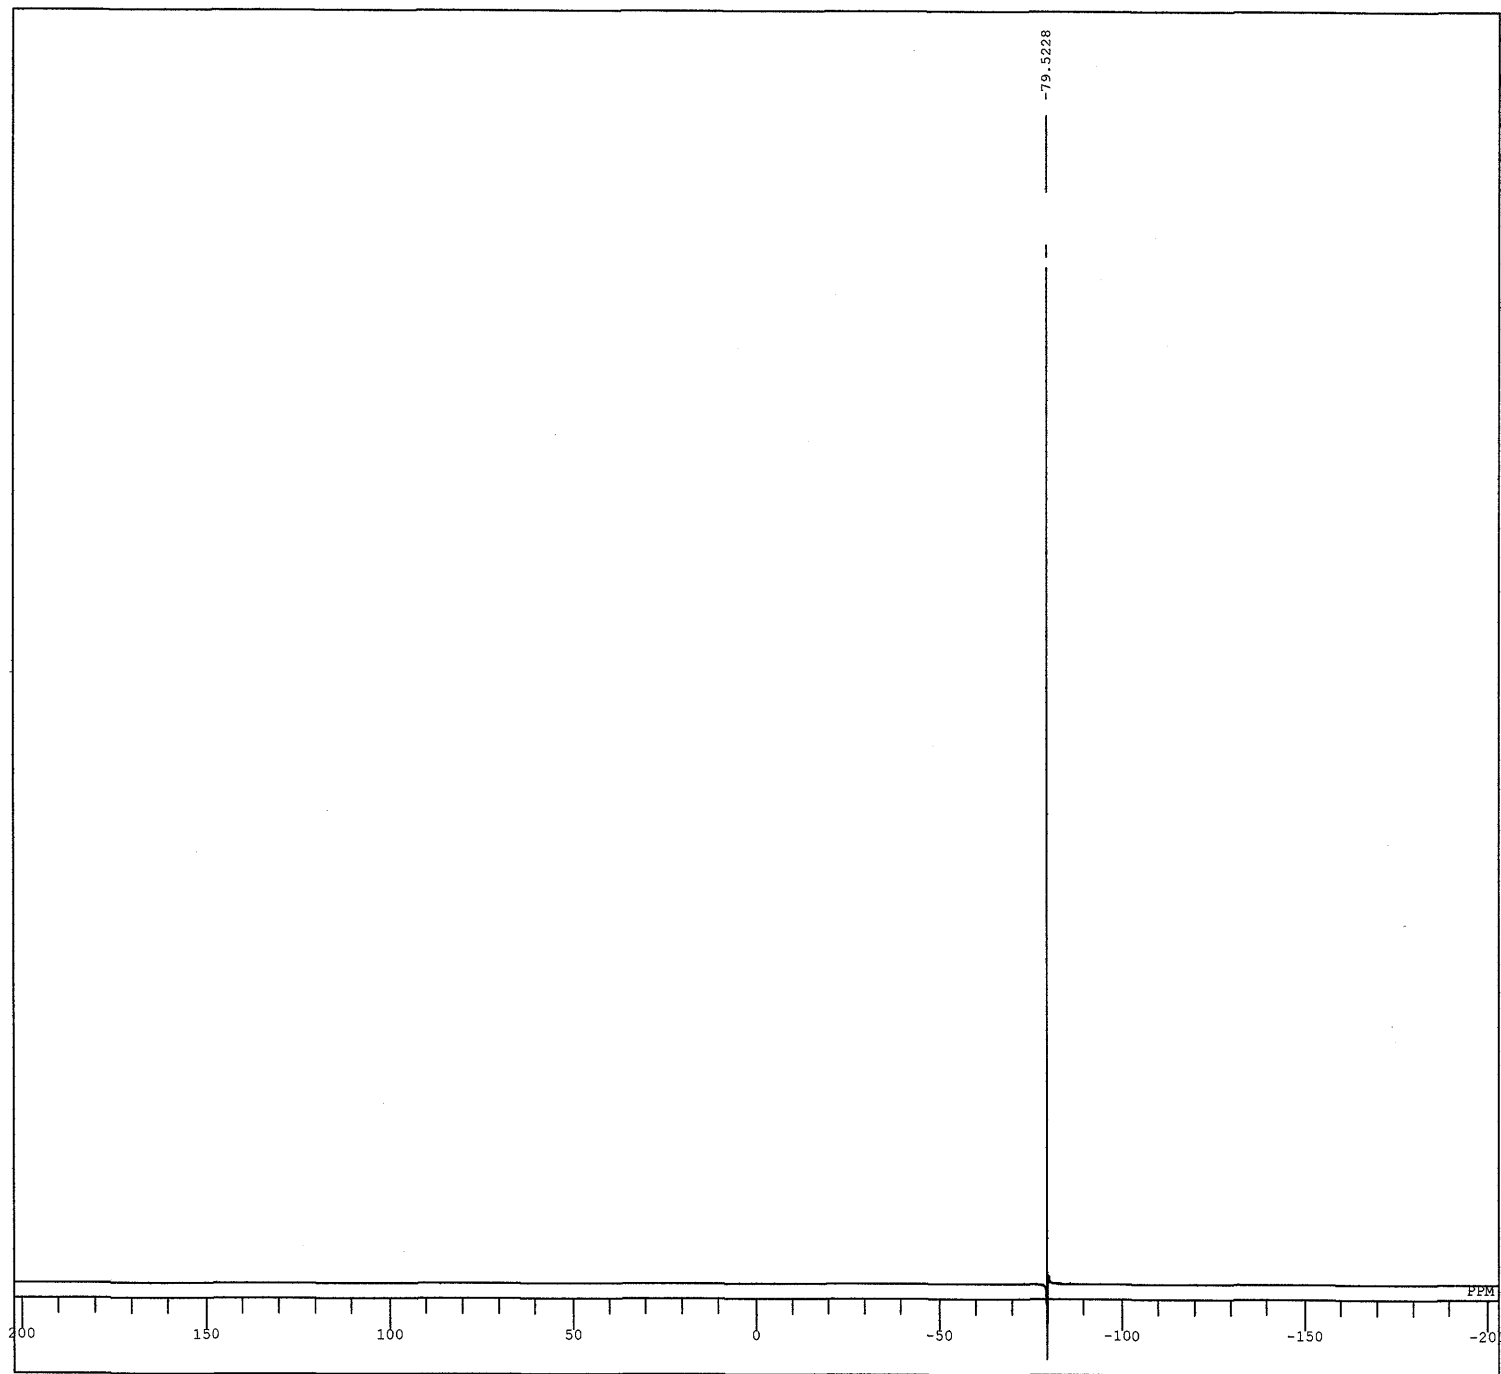

DFILE ozawa05-028\_19F.jdf  
COMNT PMB, CF3-OH  
DATIM 06-06-2014 16:03:34  
OBNUC 19F  
EXMOD proton.jxp  
OBFRO 368.64 MHz  
OBSFT 7.63 KHz  
OBFIN 2.85 Hz  
POINT 16384  
FREQU 186567.17 Hz  
SCANS 4  
ACQTM 0.0878 sec  
PD 5.0000 sec  
PW1 3.90 usec  
IRNUC 19F  
CTEMP 24.0 c  
SLVNT ACETN  
EXREF -164.90 ppm  
BF 0.12 Hz  
RGAIN 48

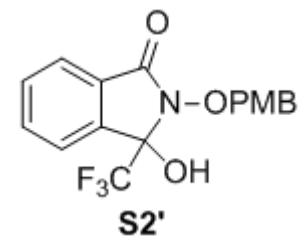

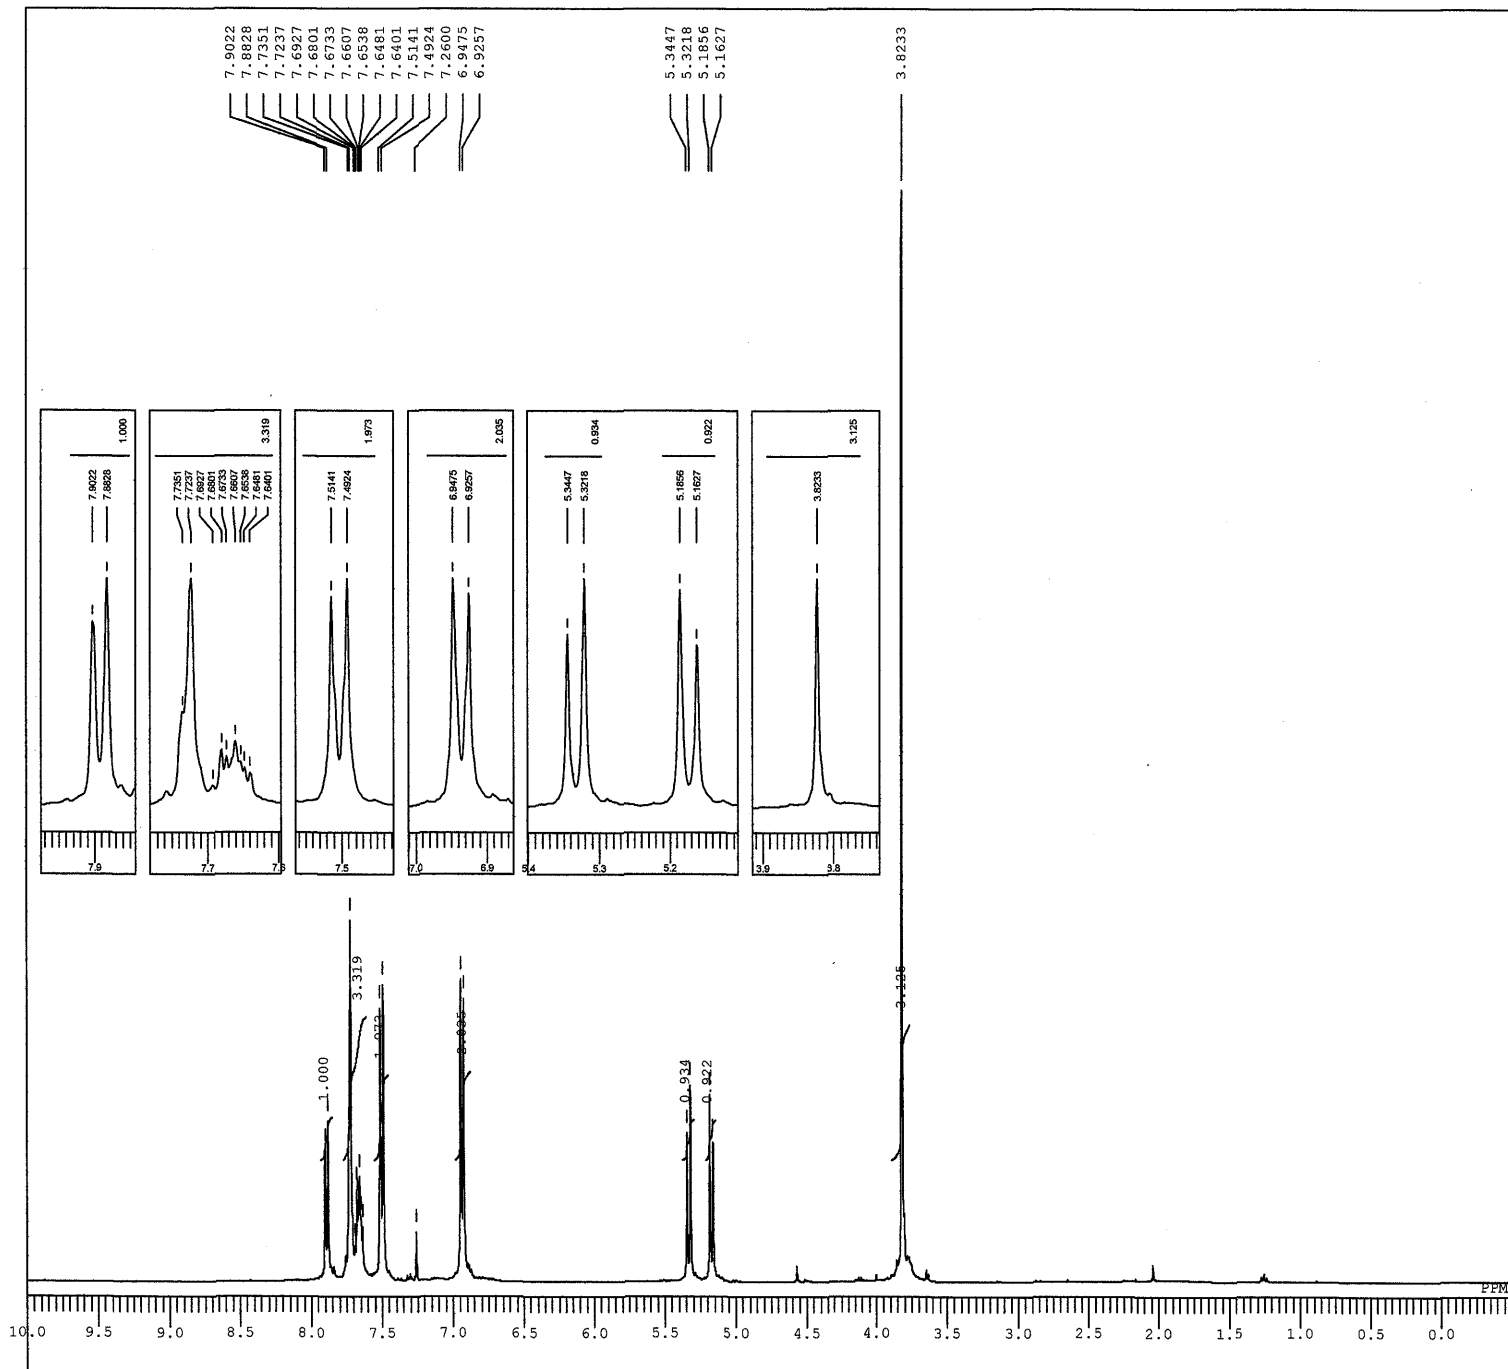

```

DFILE ozawa05-030_1H.jdf
COMNT CF3-Cl, PMB
DATIM 16-08-2014 12:34:12
OBNUC 1H
EXMOD proton.jxp
OBFREQ 391.78 MHz
OBSETE 8.51 KHz
OBFIN 3.34 Hz
POINT 16384
FREQU 7348.62 Hz
SCANS 4
ACQTM 2.2295 sec
PD 5.0000 sec
PW1 5.25 usec
IRNUC 1H
CTEMP 24.2 c
SLVNT CDCL3
EXREF 7.26 ppm
BF 1.20 Hz
RGAIN 30
  
```

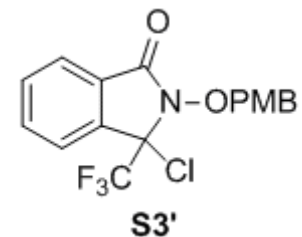

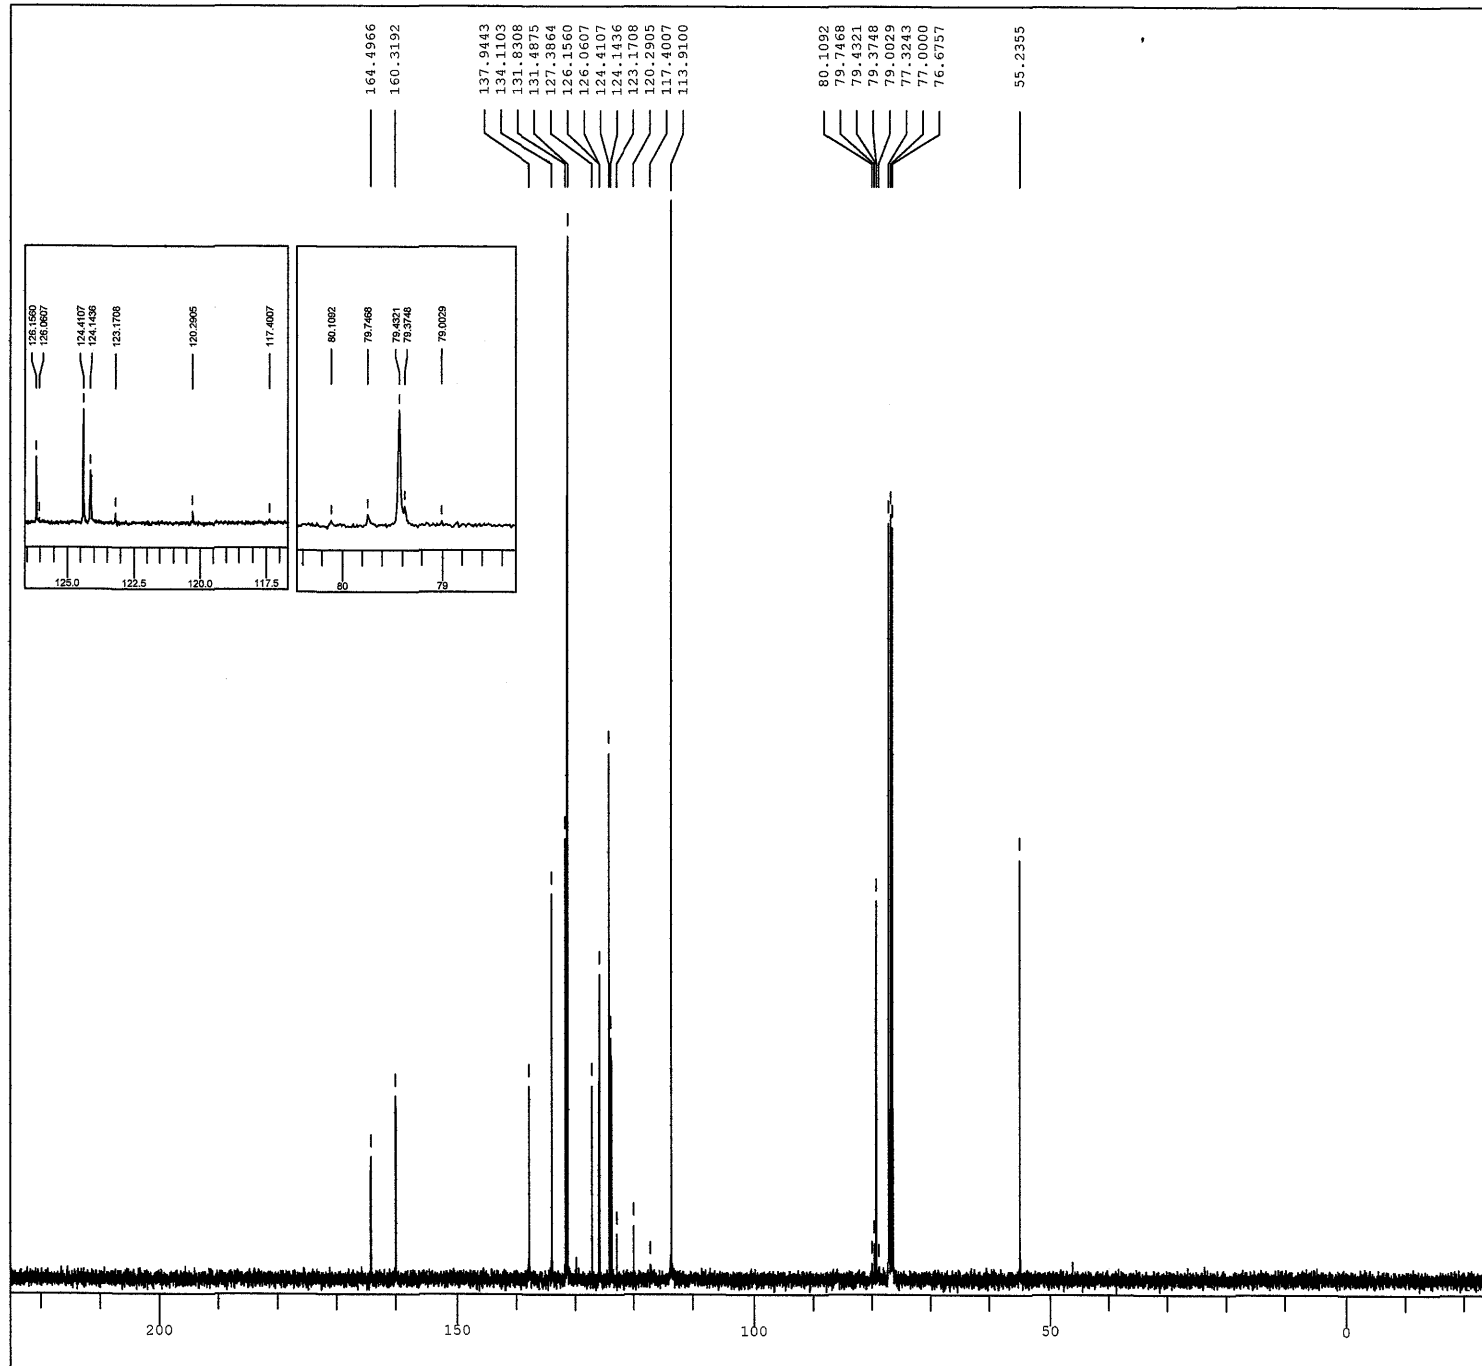

DFILE ozawa05-030\_13c.jdf  
 COMNT CF3-Cl, PMB  
 DATIM 16-08-2014 12:35:19  
 OBNUC 13C  
 EXMOD carbon.jxp  
 OBFREQ 98.52 MHz  
 OBSETE 4.64 KHz  
 OBFIN 8.74 Hz  
 POINT 32767  
 FREQU 30788.18 Hz  
 SCANS 200  
 ACQTM 1.0643 sec  
 PD 3.0000 sec  
 PW1 3.00 usec  
 IRNUC 1H  
 CTEMP 24.4 c  
 SLVNT CDCL3  
 EXREF 77.00 ppm  
 BF 1.00 Hz  
 RGAIN 60

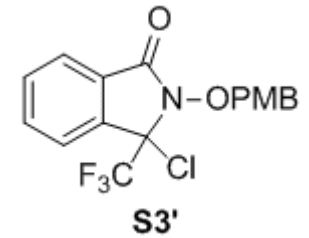

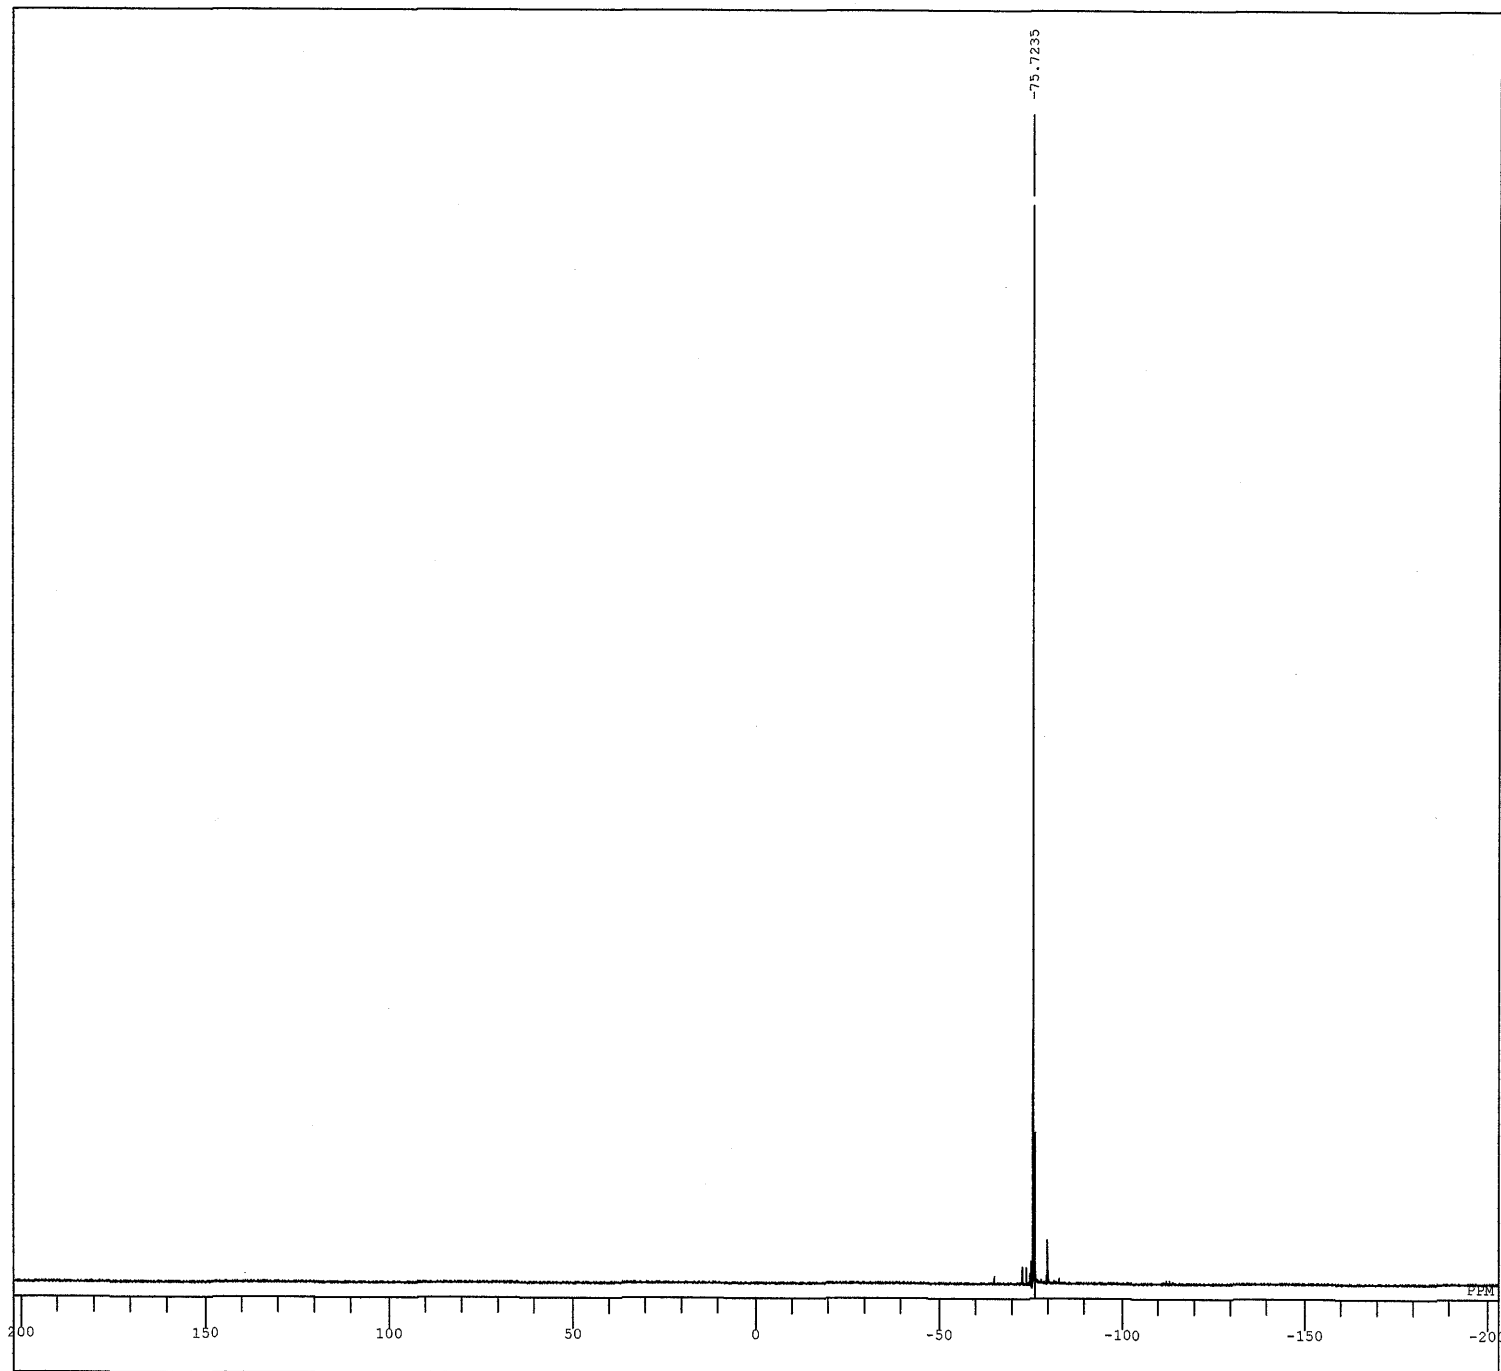

DFILE ozawa05-030\_19F.jdf  
COMNT CF3-Cl, PMB  
DATIM 16-08-2014 12:32:11  
OBNUC 19F  
EXMOD proton.jxp  
OBFRQ 368.64 MHz  
OBSET 7.63 KHz  
OBFIN 2.85 Hz  
POINT 16384  
FREQU 186567.17 Hz  
SCANS 4  
ACQTM 0.0878 sec  
PD 5.0000 sec  
PW1 3.90 usec  
IRNUC 19F  
CTEMP 24.1 c  
SLVNT CDCL3  
EXREF -164.90 ppm  
BF 1.20 Hz  
RGAIN 46

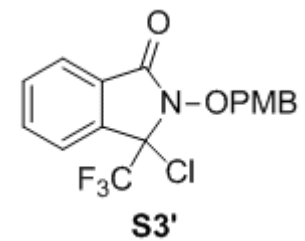

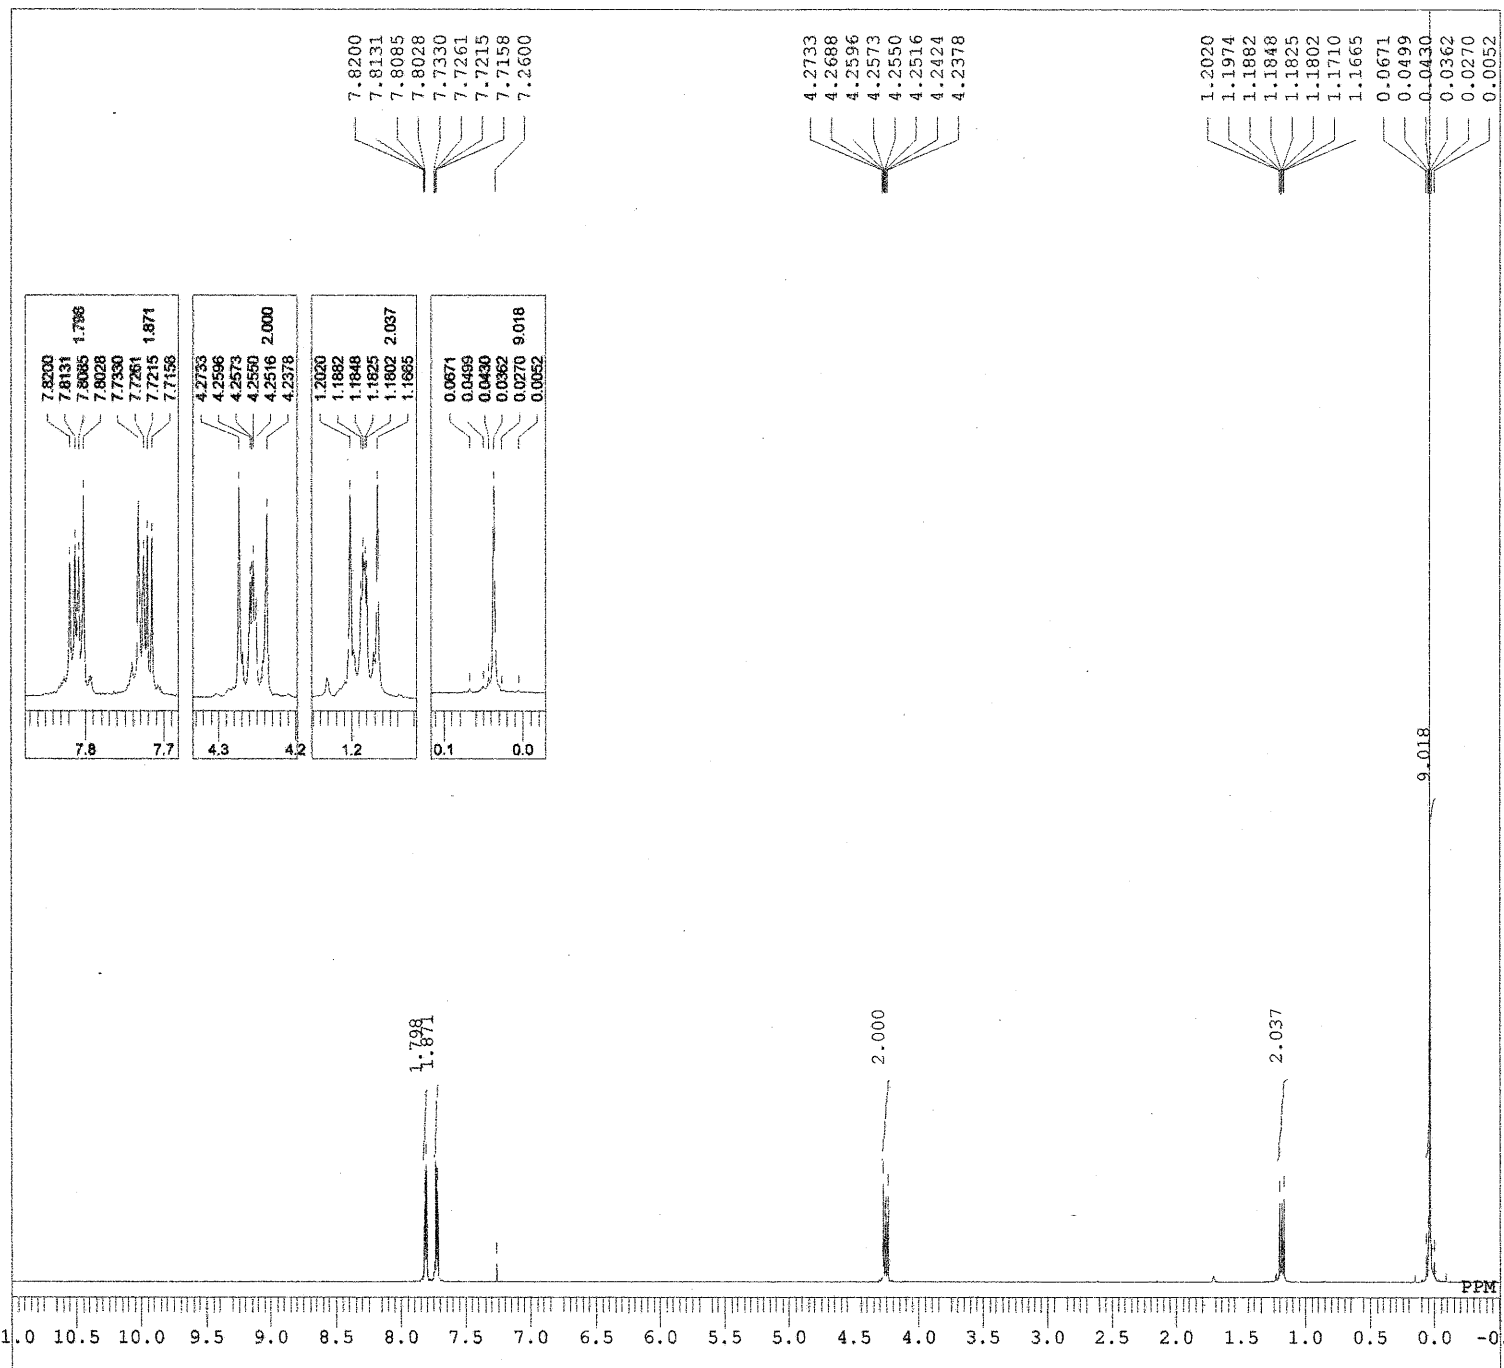

```

DFILE ozawa07-066_1h.jdf
COMNT TMS-Et-NHPI
DATIM 2015-04-01 10:10:32
OBNUC 1H
EXMOD proton.jxp
OBFRQ 500.16 MHz
OBSET 2.41 KHz
OBFIN 6.01 Hz
POINT 16384
FREQU 9384.38 Hz
SCANS 4
ACQTM 1.7459 sec
PD 5.0000 sec
PW1 5.55 usec
IRNUC 1H
CTEMP 27.8 c
SLVNT CDCL3
EXREF 7.26 ppm
BF 0.12 Hz
RGAIN 26
    
```

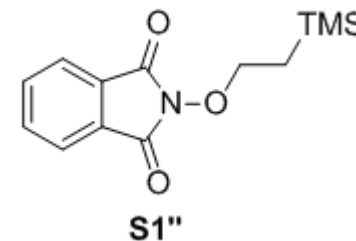

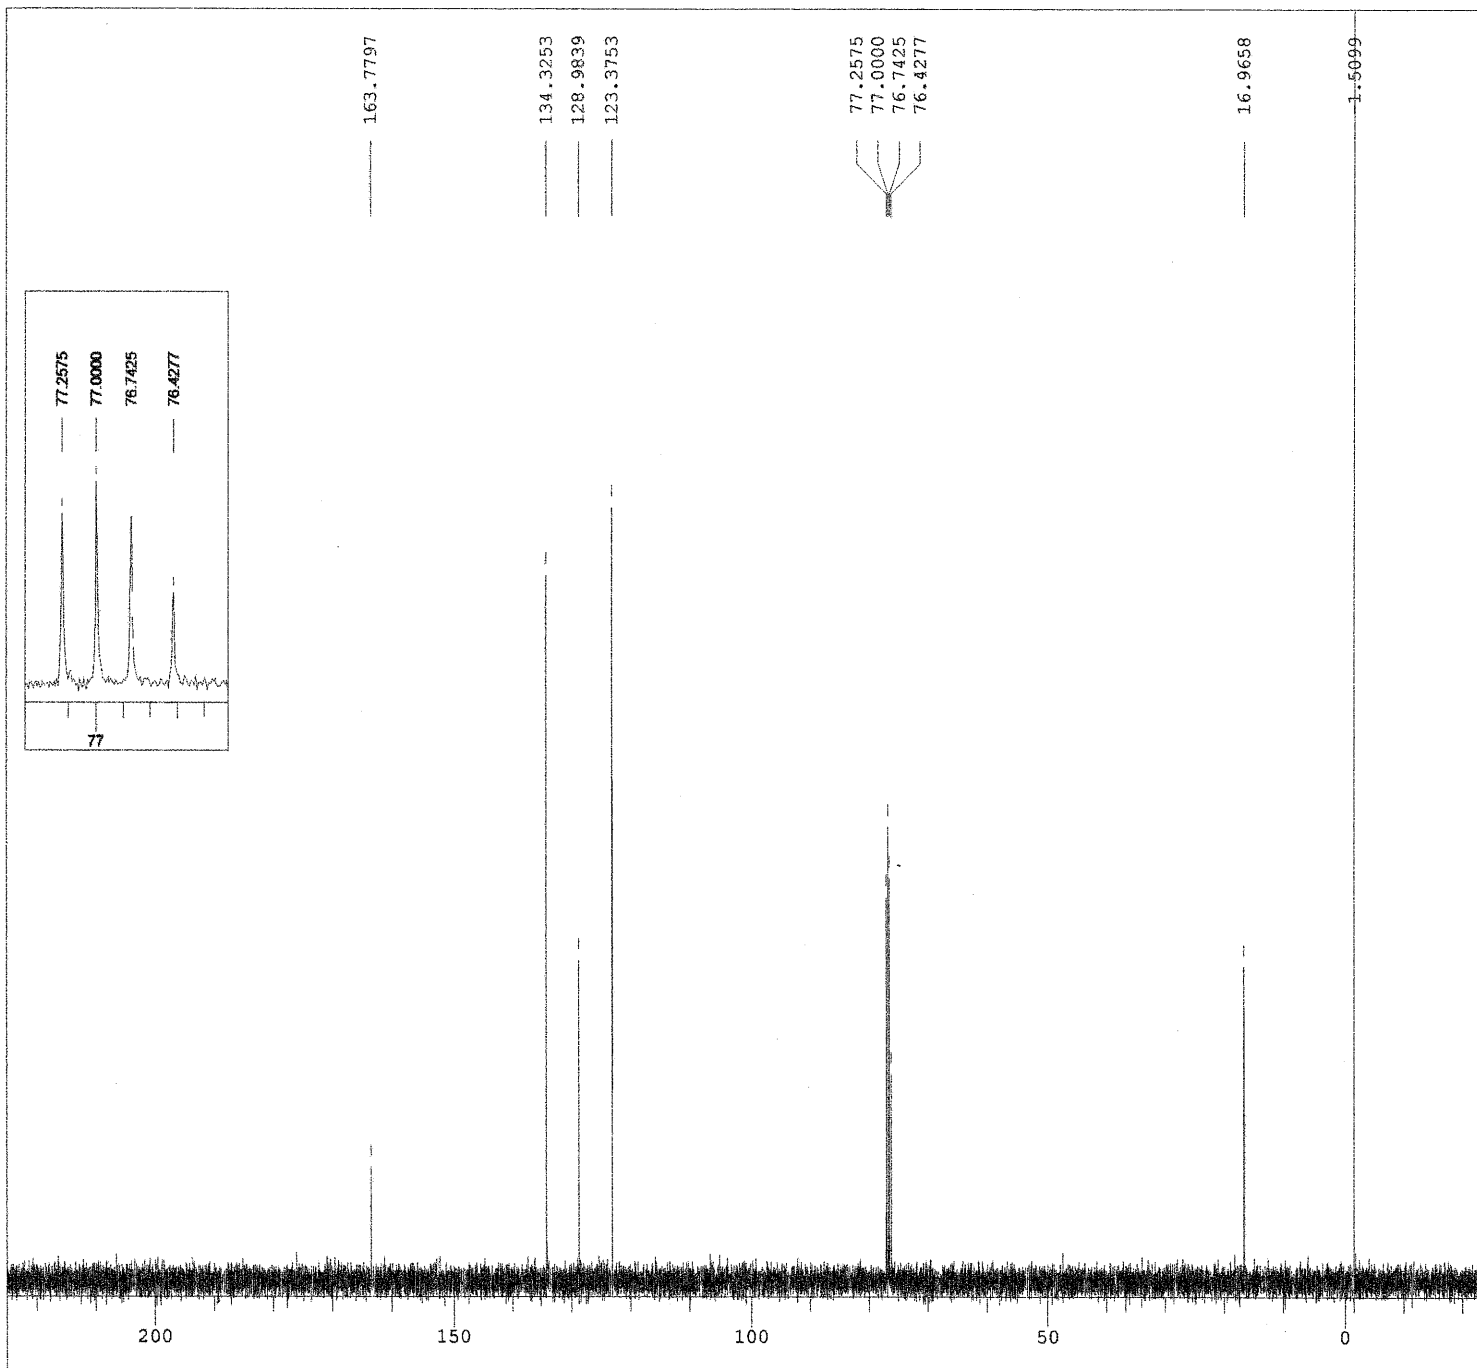

DFILE ozawa07-066\_13C.jdf  
COMNT TMS-Et-NHPI  
DATIM 2015-04-01 10:11:34  
OBNUC 13C  
EXMOD carbon.jxp  
OBFRQ 125.77 MHz  
OBSET 7.87 KHz  
OBFIN 4.21 Hz  
POINT 32767  
FREQU 39308.18 Hz  
SCANS 16  
ACQTM 0.8336 sec  
PD 2.0000 sec  
PWL 3.40 usec  
IRNUC 1H  
CTEMP 27.9 c  
SLVNT CDCL3  
EXREF 77.00 ppm  
BF 0.12 Hz  
RGAIN 60

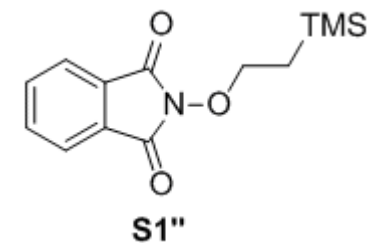



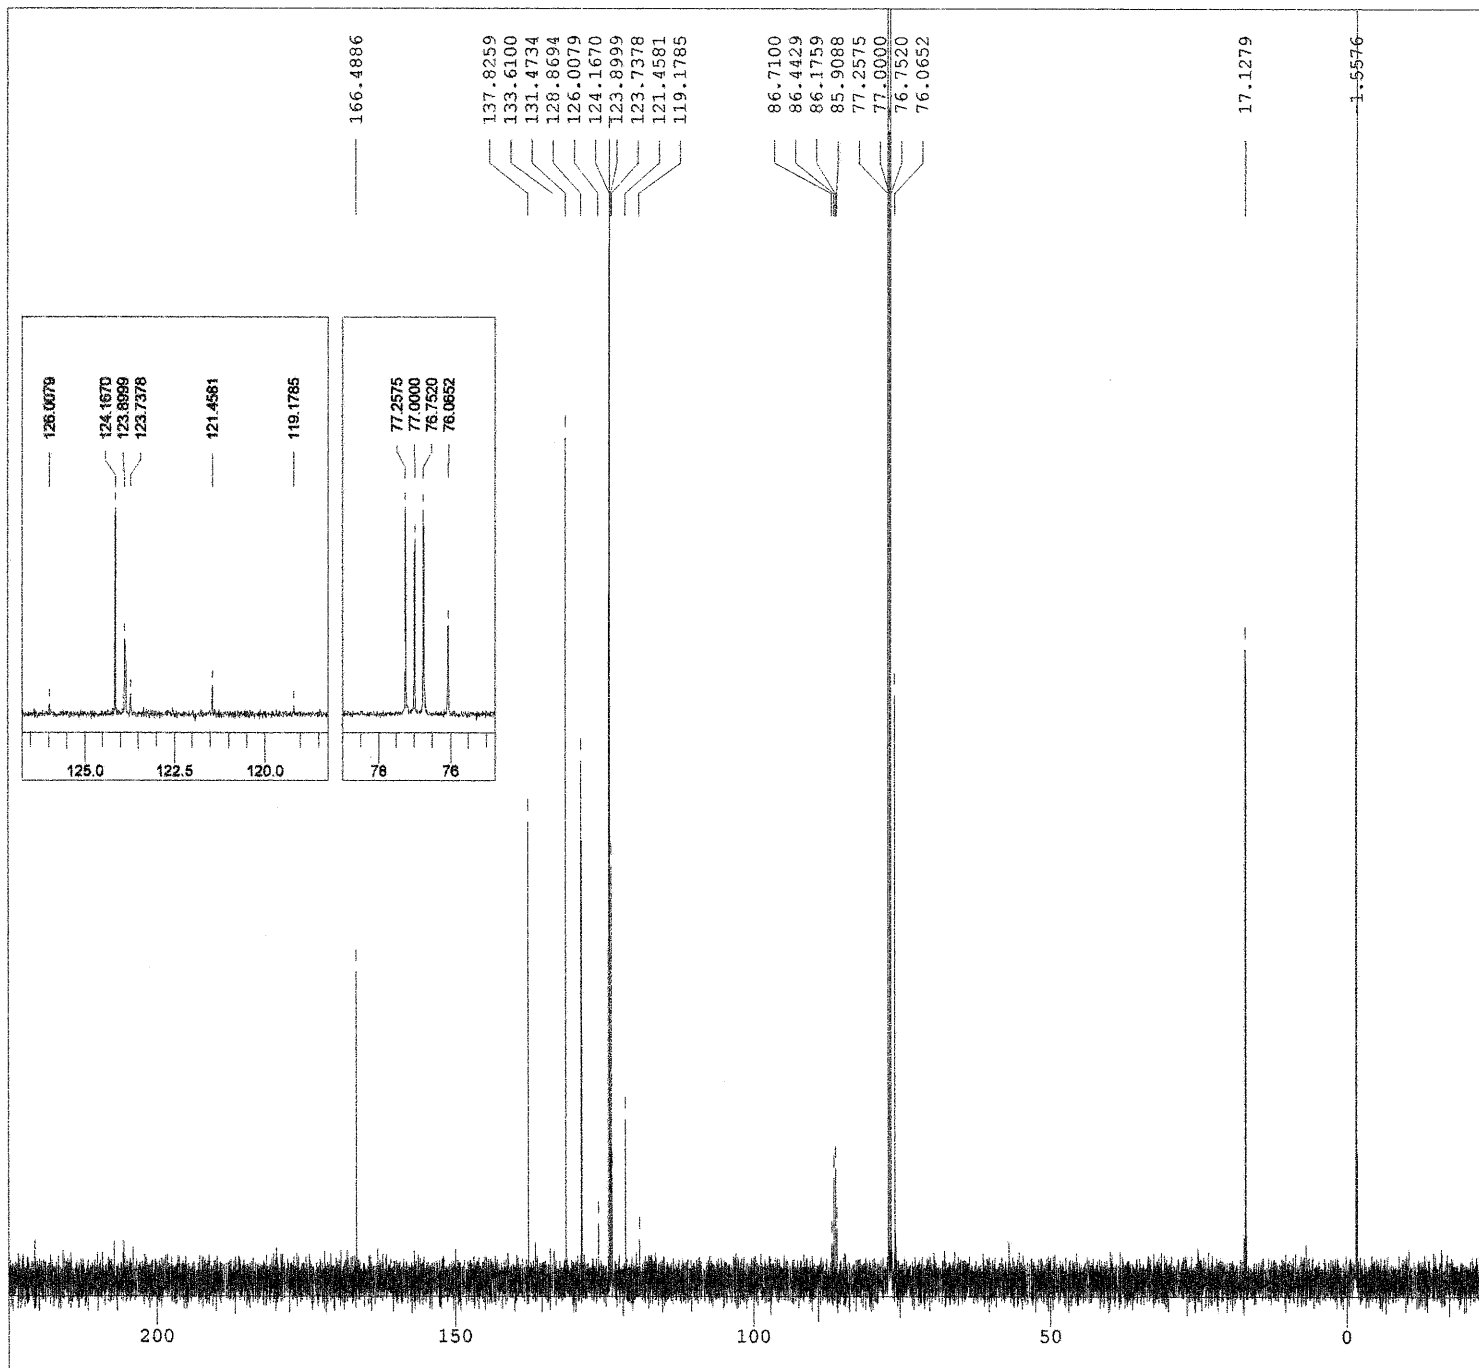

DFILE ozawa06-56\_13C.jdf  
 COMNT TMS-Et, CF3-OH  
 DATIM 2015-04-01 15:16:41  
 OBNUC 13C  
 EXMOD carbon.jxp  
 OBFRQ 125.77 MHz  
 OBSET 7.87 KHz  
 OBFIN 4.21 Hz  
 POINT 32767  
 FREQU 39308.18 Hz  
 SCANS 180  
 ACQTM 0.8336 sec  
 PD 2.0000 sec  
 PW1 3.40 usec  
 IRNUC 1H  
 CTEMP 28.4 c  
 SLVNT CDCL3  
 EXREF 77.00 ppm  
 BF 0.12 Hz  
 RGAIN 60

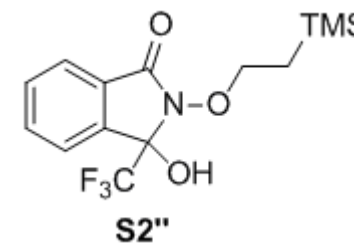



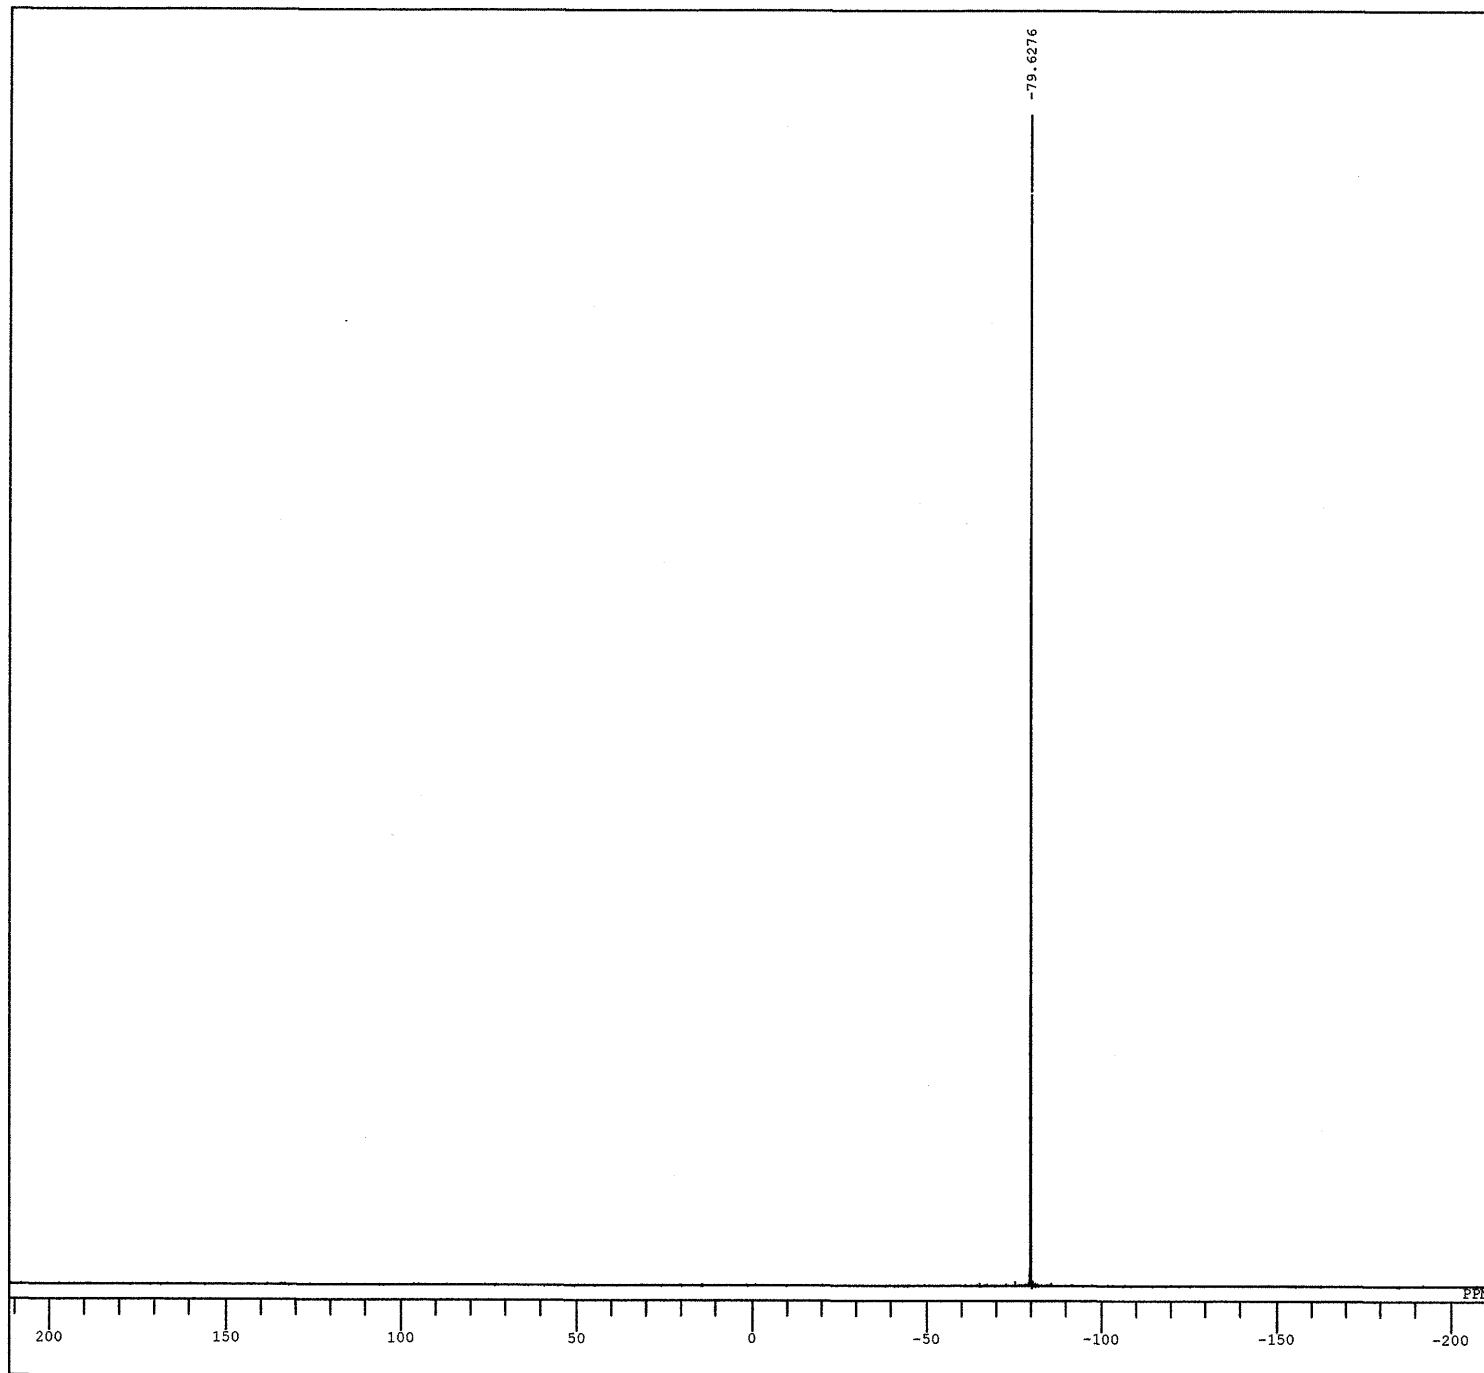

DFILE ozawa07-056\_19F.jdf  
COMNT TMS-Et, CF3-OH  
DATIM 01-04-2015 16:39:46  
OBNUC 19F  
EXMOD proton.jxp  
OBFRO 368.64 MHz  
OBSET 7.63 KHz  
OBFIN 2.85 Hz  
POINT 16384  
FREOU 195312.50 Hz  
SCANS 4  
ACQTM 0.0839 sec  
PD 5.0000 sec  
PW1 3.90 usec  
IRNUC 19F  
CTEMP 26.7 c  
SLVNT CDCL3  
EKREF -164.90 ppm  
BF 0.12 Hz  
RGAIN 48

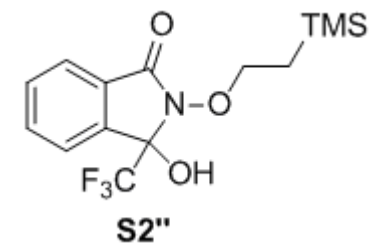

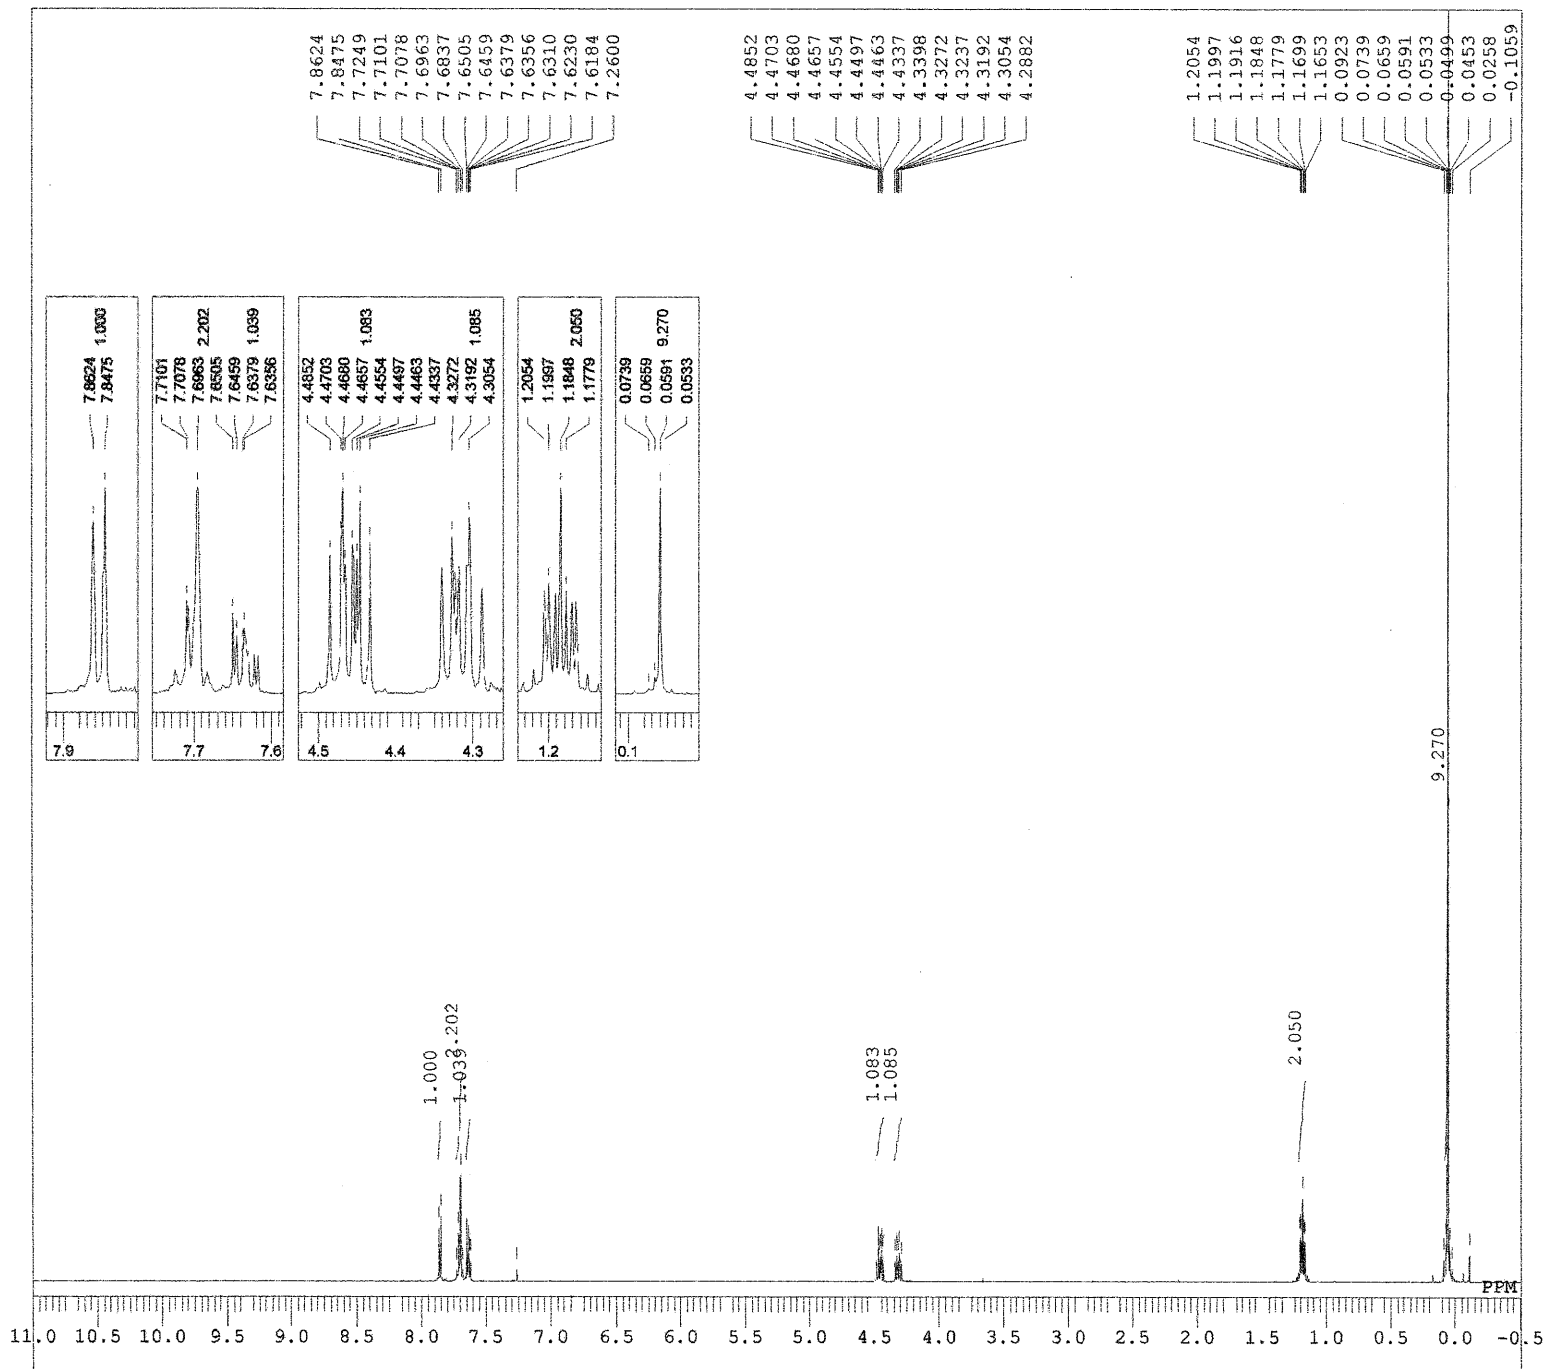

DFILE K008-129\_1h.jdf  
 COMNT TMS-Et, CF3-C1  
 DATIM 2015-04-01 15:06:01  
 OBNUC 1H  
 EXMOD proton.jxp  
 OBFRQ 500.16 MHz  
 OBSET 2.41 KHz  
 OBFIN 6.01 Hz  
 POINT 16384  
 FREQU 9384.38 Hz  
 SCANS 4  
 ACQTM 1.7459 sec  
 PD 5.0000 sec  
 PW1 5.55 usec  
 IRNUC 1H  
 CTEMP 27.9 c  
 SLVNT CDCL3  
 EXREF 7.26 ppm  
 BF 0.12 Hz  
 RGAIN 26

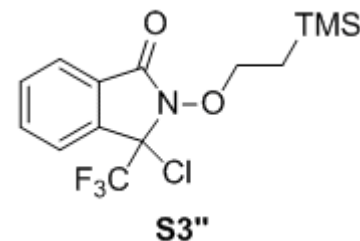

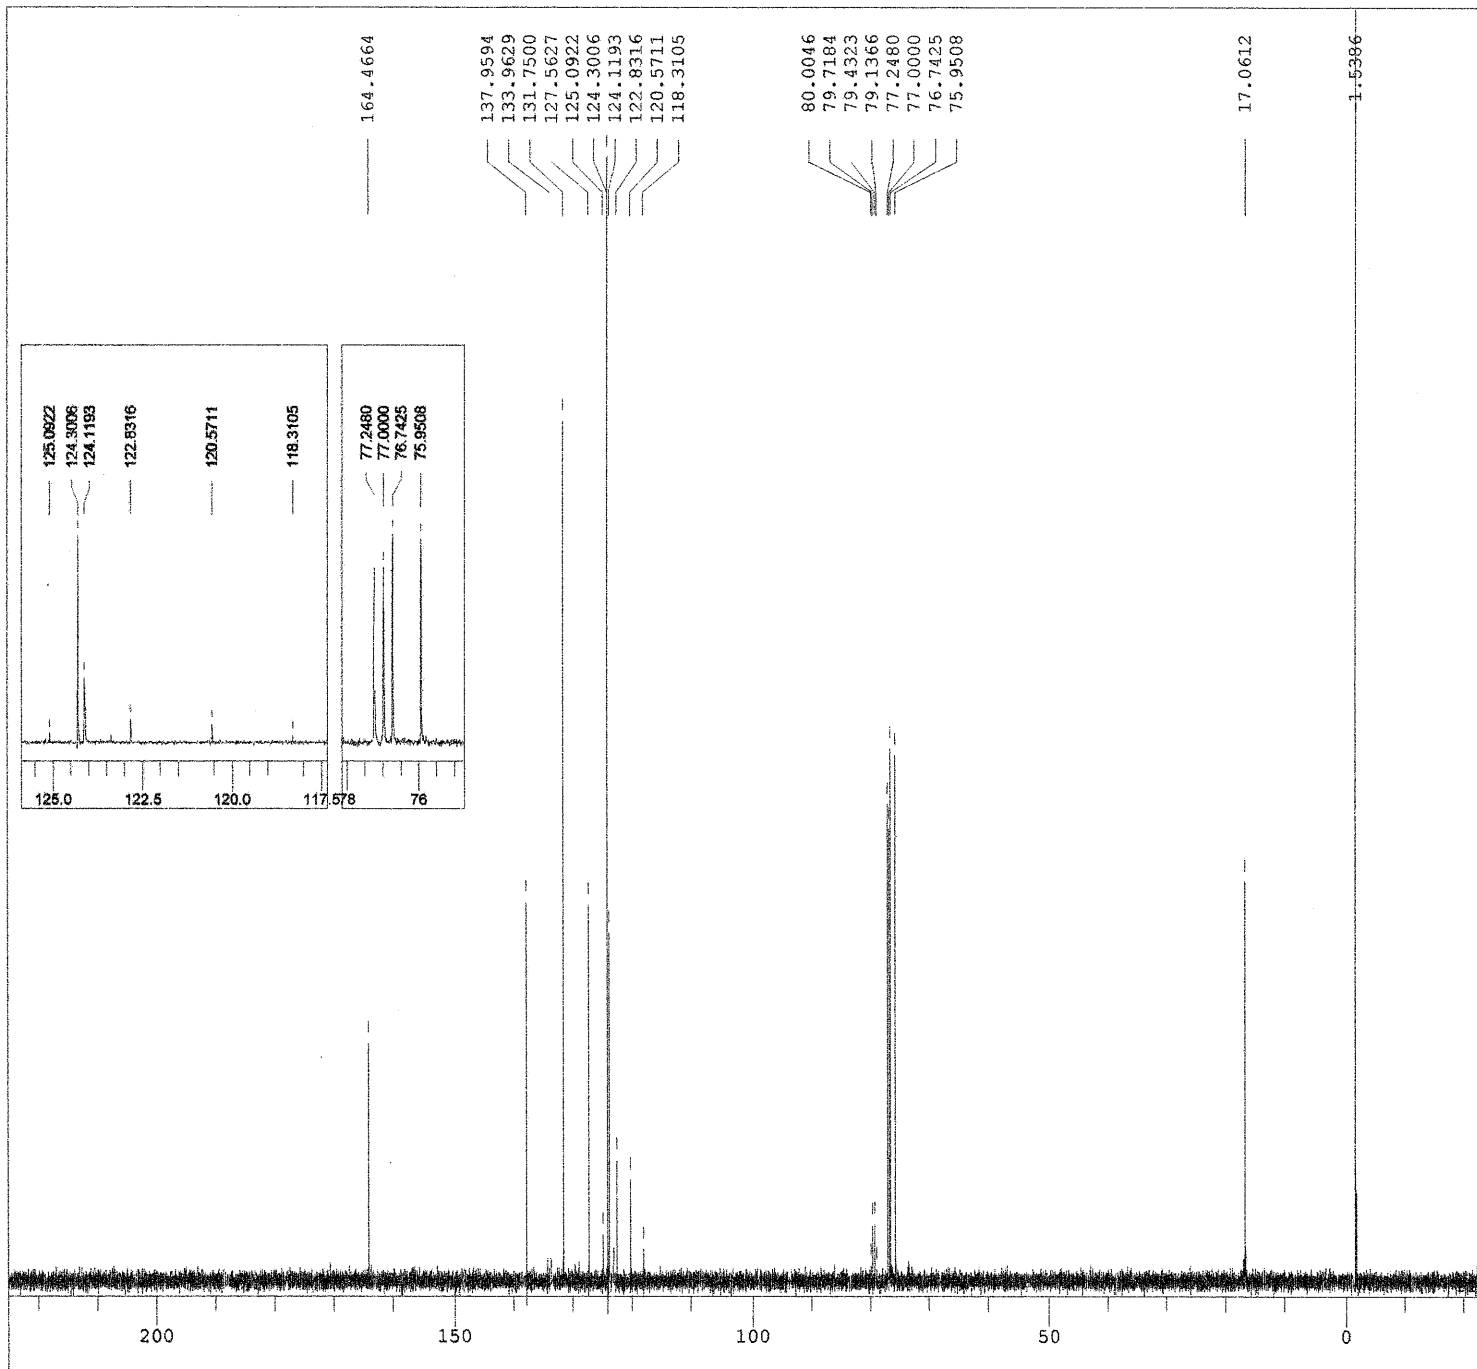

DFILE K008-129\_13C.jdf  
 COMNT TMS-Et, CF3-Cl  
 DATIM 2015-04-01 15:07:04  
 OBNUC 13C  
 EXMOD carbon.jxp  
 OBFRQ 125.77 MHz  
 OBSET 7.87 KHz  
 OBFIN 4.21 Hz  
 POINT 32767  
 FREQU 39308.18 Hz  
 SCANS 112  
 ACQTM 0.8336 sec  
 PD 2.0000 sec  
 PW1 3.40 usec  
 IRNUC 1H  
 CTEMP 28.2 c  
 SLVNT CDCL3  
 EXREF 77.00 ppm  
 BF 0.12 Hz  
 RGAIN 60

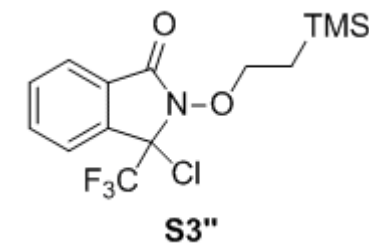

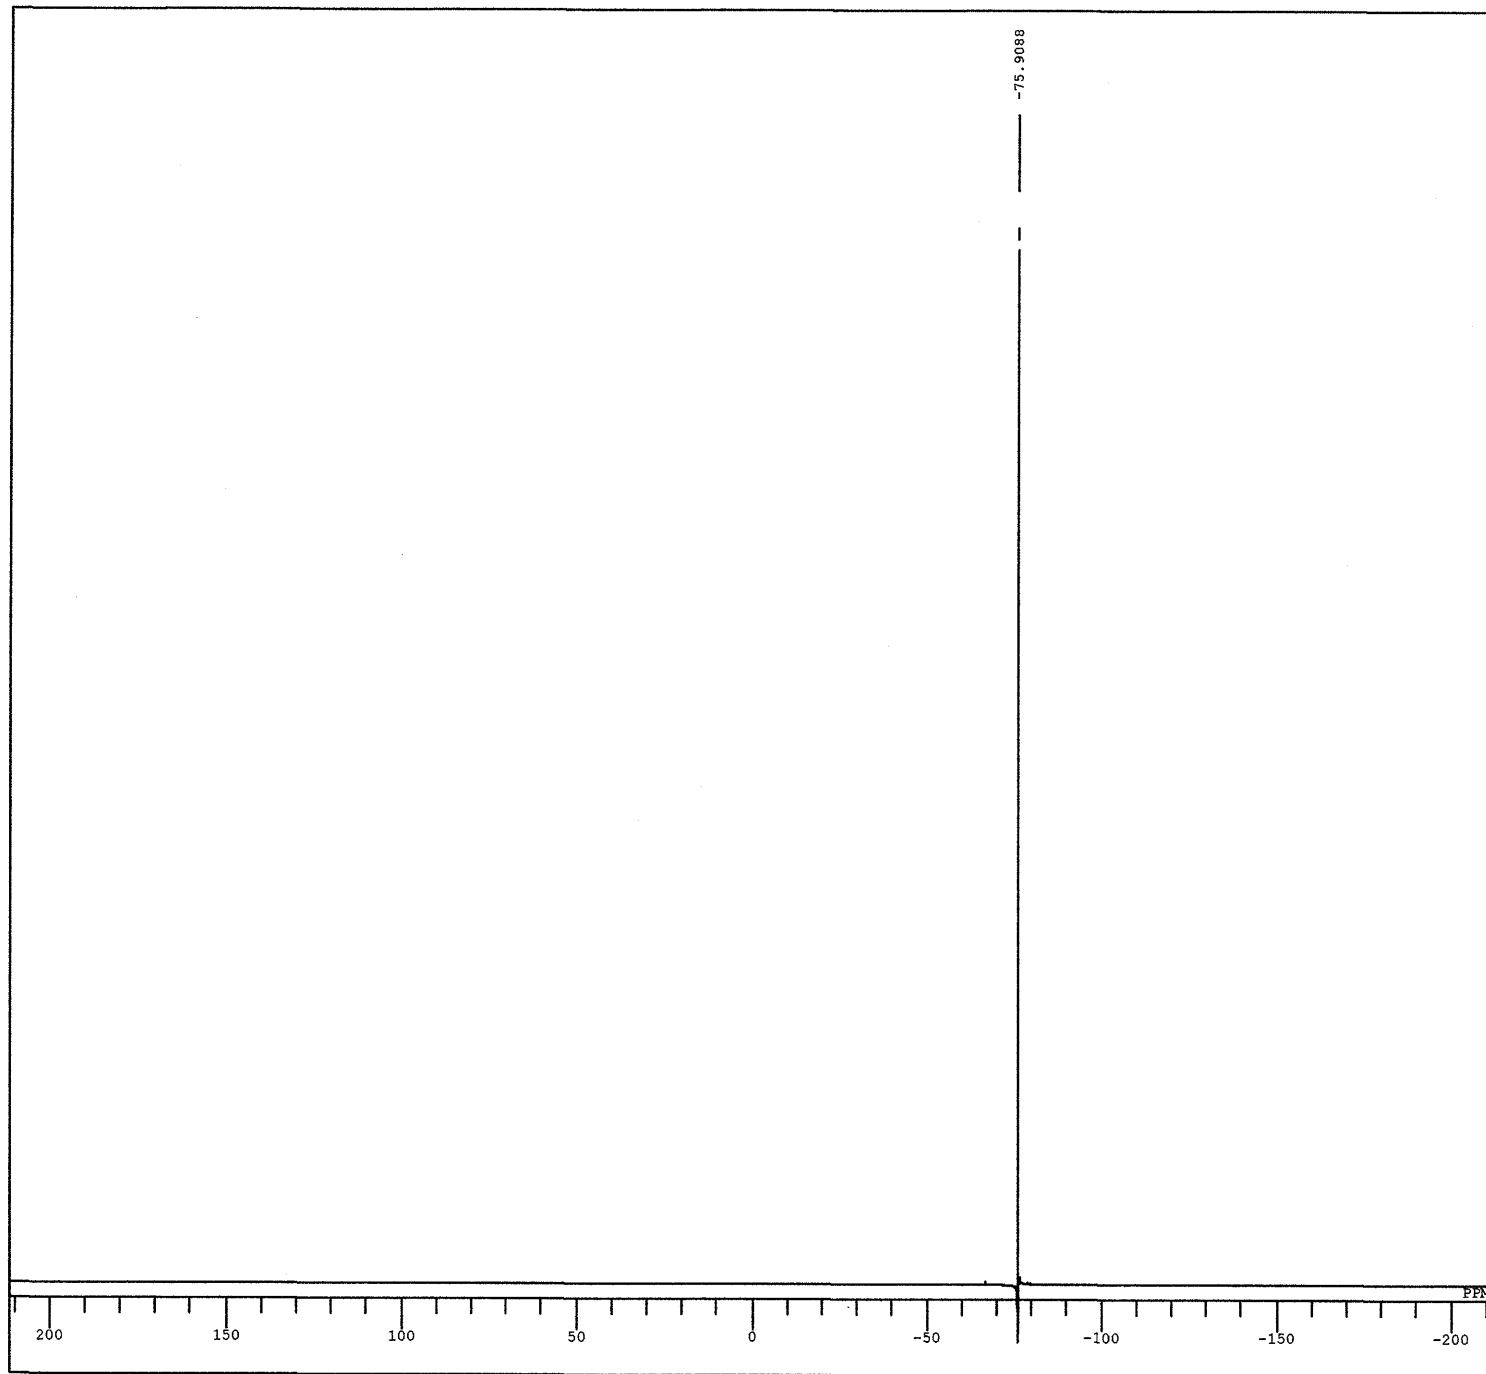

DFILE K008-129 19F.jdf  
COMNT TMS-Et, CF3-Cl  
DATIM 01-04-2015 16:36:52  
OBNUC 19F  
EXMOD proton.jxp  
OBFREQ 368.64 MHz  
OBSETE 7.63 KHz  
OBFIN 2.85 Hz  
POINT 16384  
FREQU 195312.50 Hz  
SCANS 4  
ACQTM 0.0839 sec  
PD 5.0000 sec  
PW1 3.90 usec  
IRNUC 19F  
CTEMP 26.8 c  
SLVNT CDCL3  
EXREF -164.90 ppm  
BF 0.12 Hz  
RGAIN 46

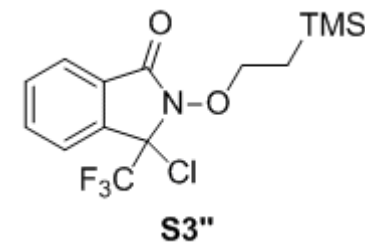



BuOH, Bn

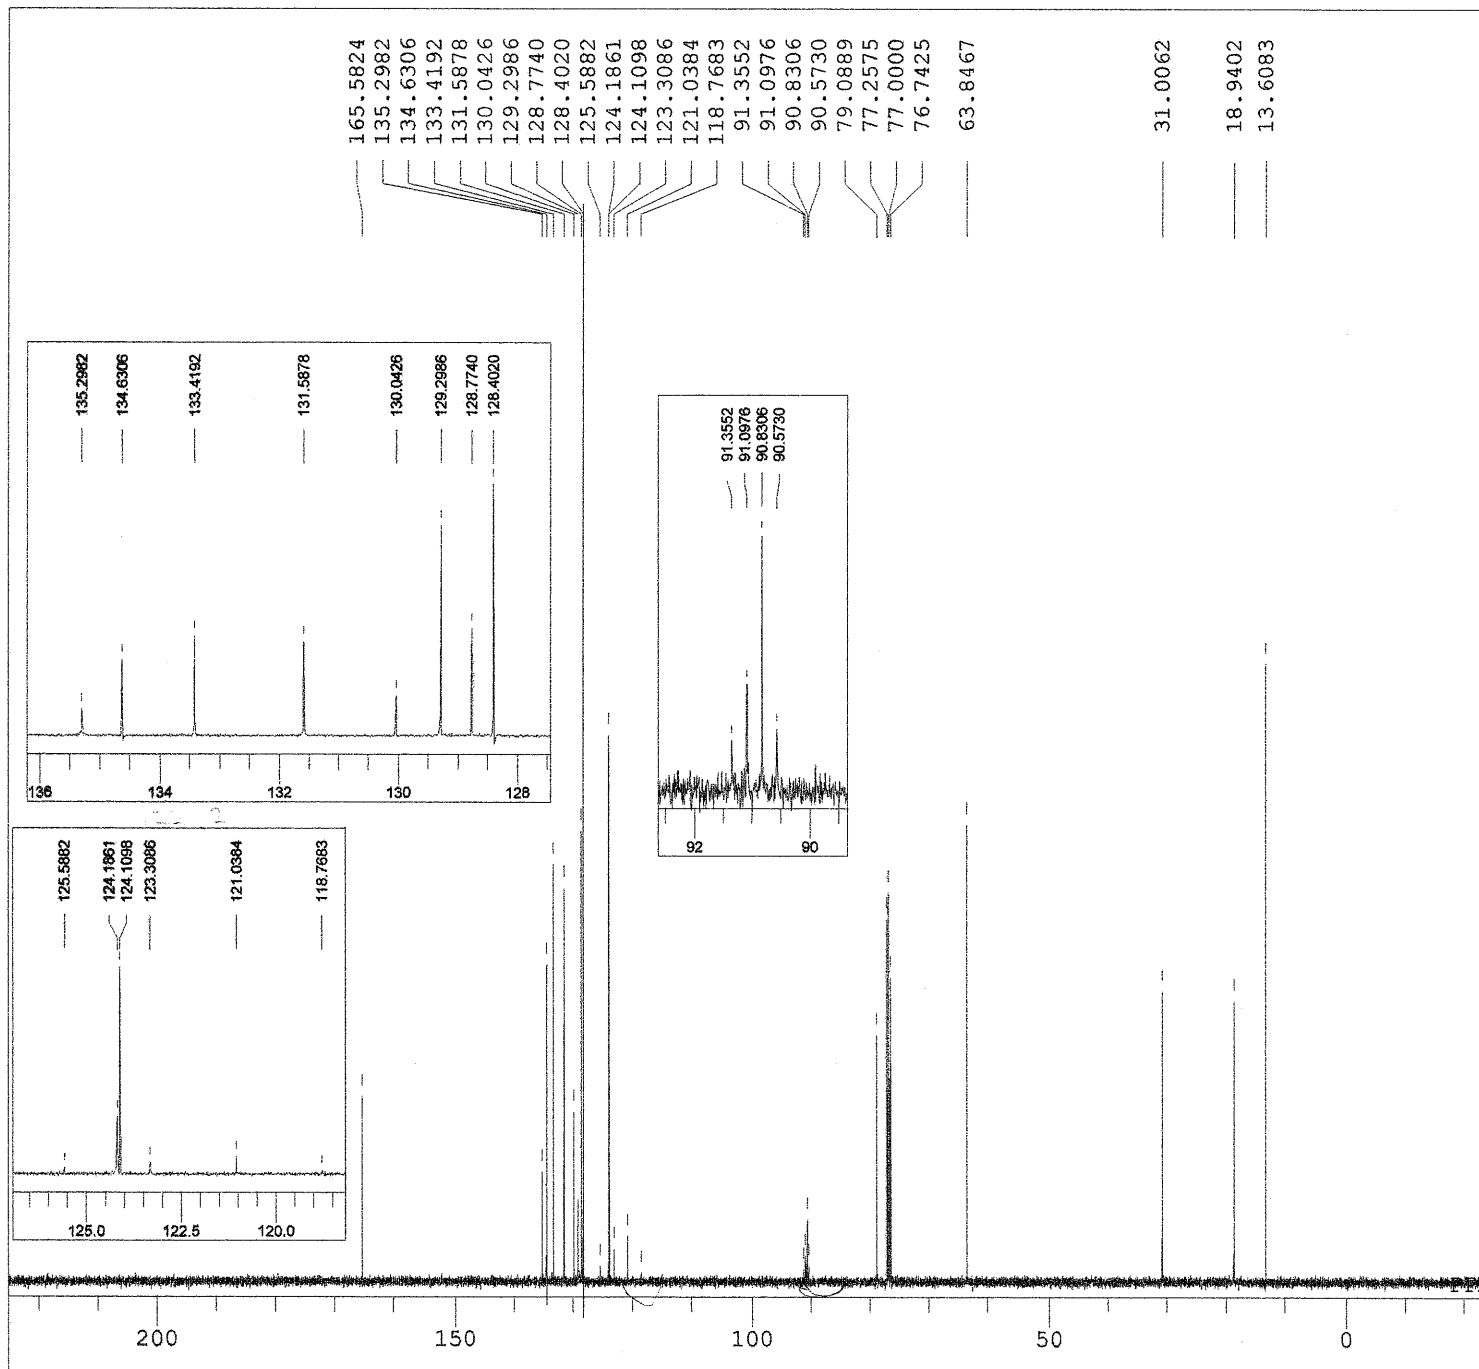

DFILE ozawa04-104\_13C.jif  
COMNT BuOH, Bn  
DATIM 2014-01-16 15:07:01  
OBNUC 13C  
EXMOD carbon.jxp  
OBFRQ 125.77 MHz  
OBSET 7.87 KHz  
OBFIN 4.21 Hz  
POINT 32767  
FREQU 39308.18 Hz  
SCANS 152  
ACQTM 0.8336 sec  
PD 3.0000 sec  
PW1 3.40 usec  
IRNUC 1H  
CTEMP 21.7 c  
SLVNT CDCL3  
EXREF 77.00 ppm  
BF 0.12 Hz  
RGAIN 60

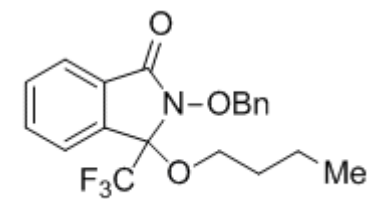

S4a

BuOH, Bn

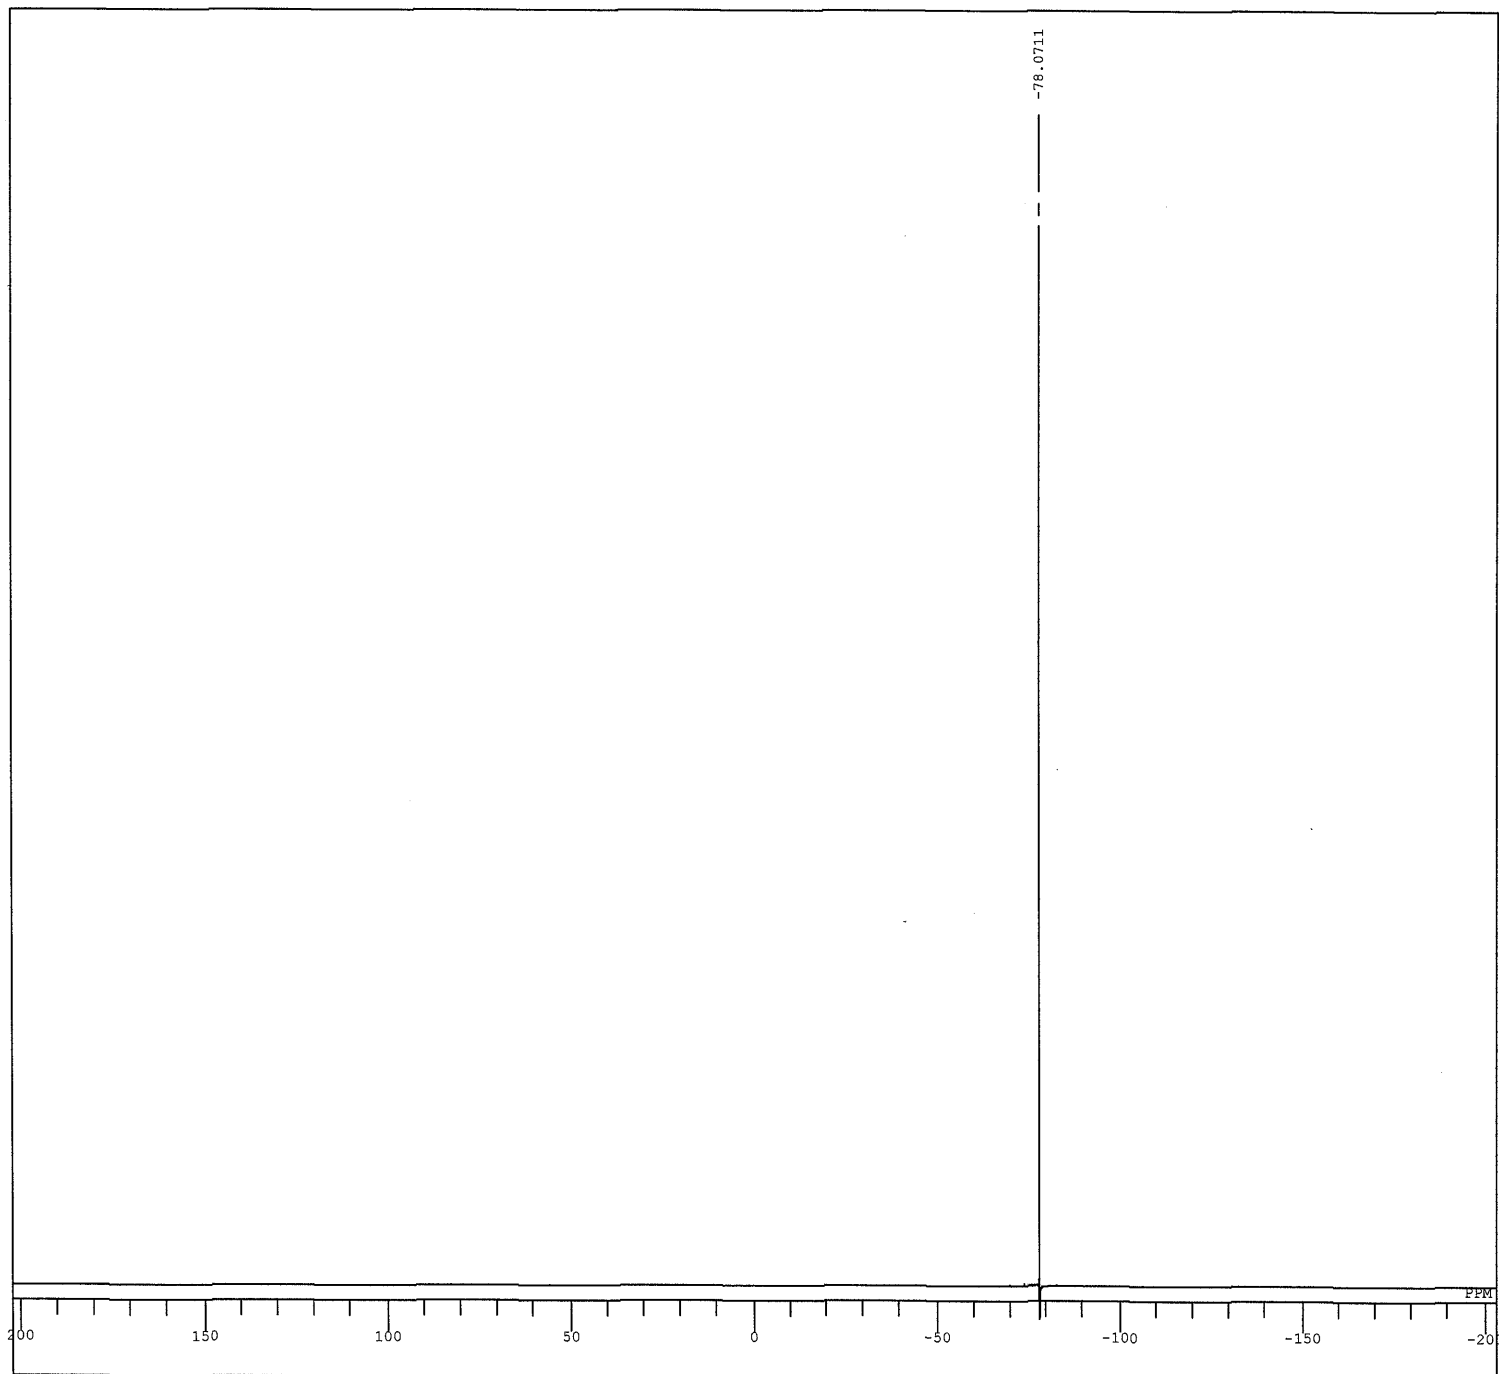

DFILE ozawa04-104\_19F.jdf  
COMNT BuOH, Bn  
DATIM 16-01-2014 15:46:24  
OBNUC 19F  
EXMOD proton.jxp  
OBFRO 368.64 MHz  
OBSEF 7.63 KHz  
OBFIN 2.85 Hz  
POINT 16384  
FREQU 186567.17 Hz  
SCANS 4  
ACQTM 0.0878 sec  
PD 5.0000 sec  
FW1 3.90 usec  
IRNUC 19F  
CTEMP 20.8 c  
SLVNT CDCL3  
EXREF -164.90 ppm  
BF 0.12 Hz  
RGAIN 44

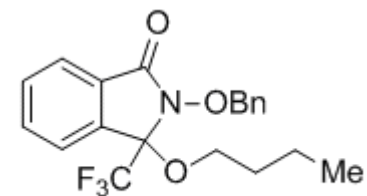

S4a

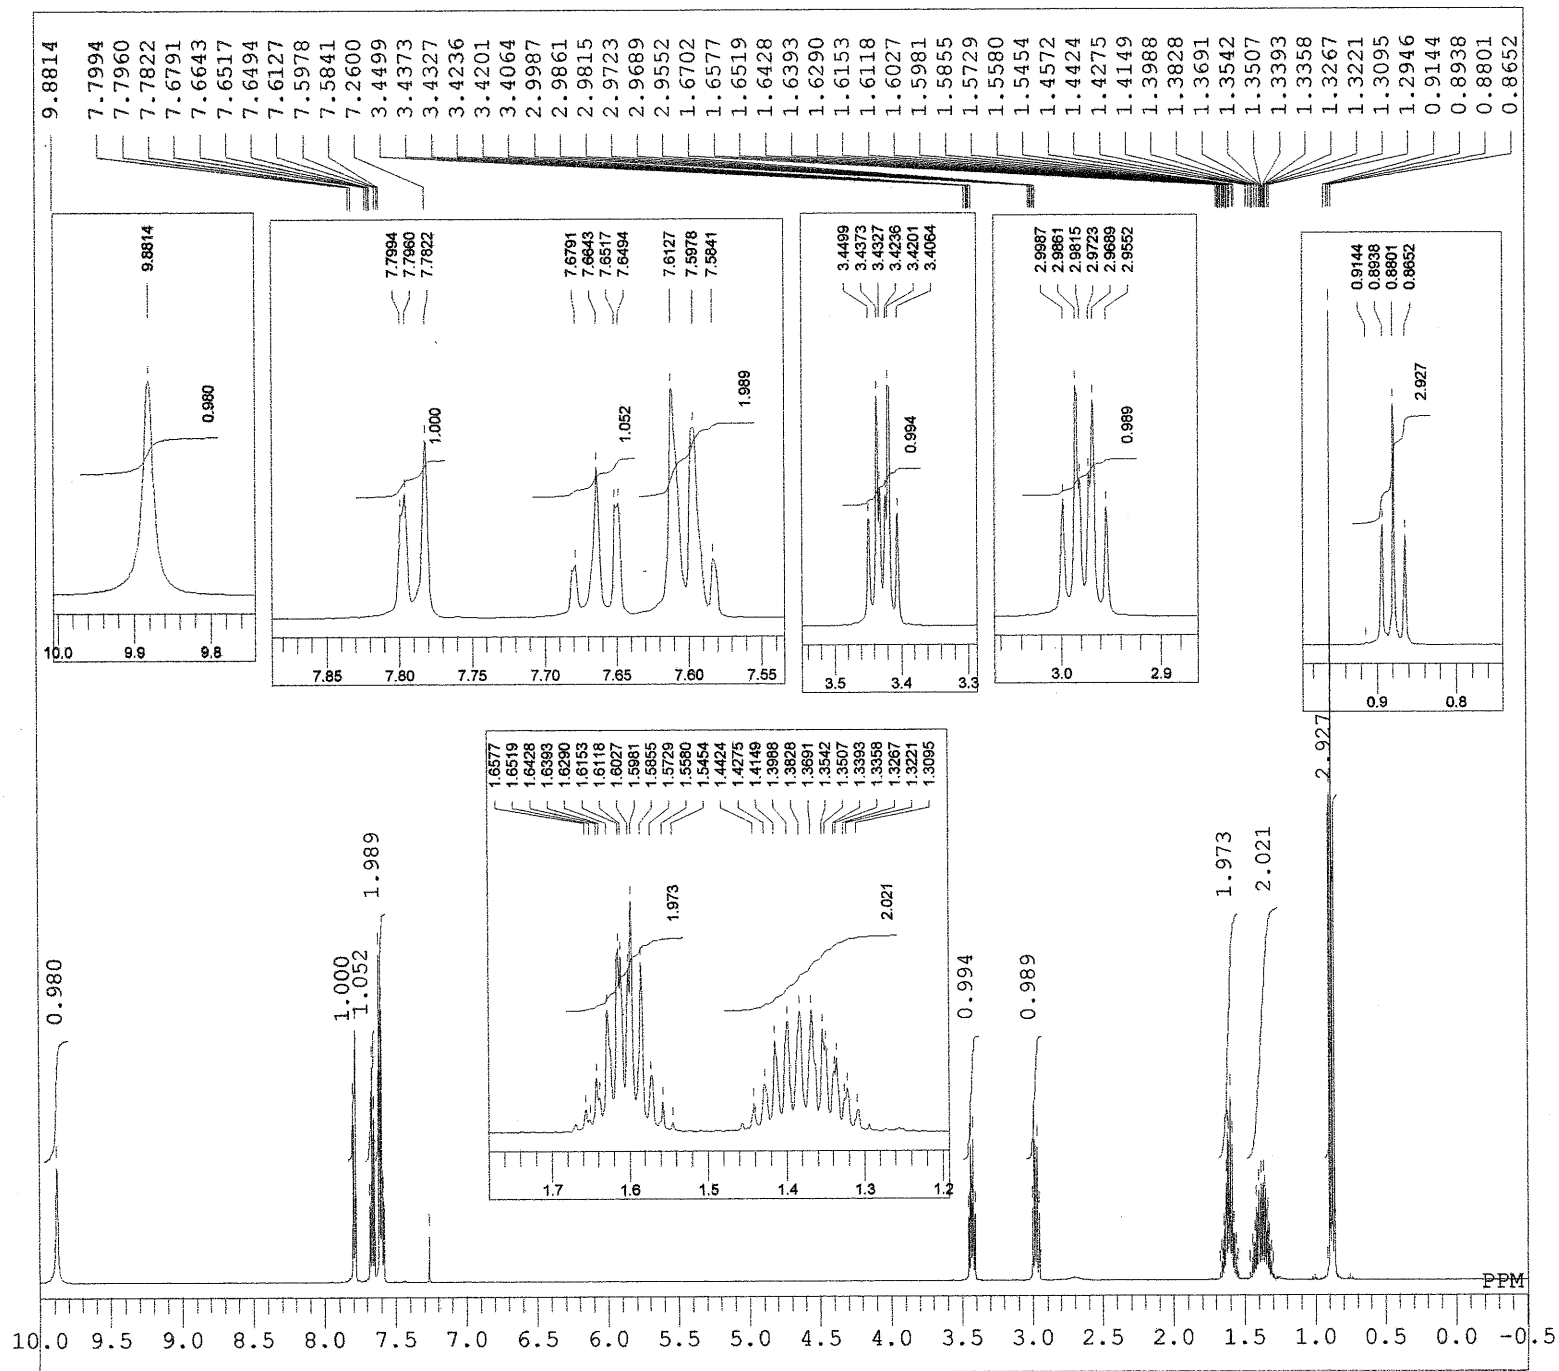

DFILE ozawa03-092\_1H.als  
 COMNT  
 DATIM 2013-11-14 19:52:17  
 OBNUC 1H  
 EXMOD proton.jxp  
 OBFRQ 500.16 MHz  
 OBSET 2.41 KHz  
 OBFIN 6.01 Hz  
 POINT 13107  
 FREQU 7507.51 Hz  
 SCANS 4  
 ACQTM 1.7459 sec  
 PD 5.0000 sec  
 PW1 5.55 usec  
 IRNUC 1H  
 CTEMP 22.9 c  
 SLVNT CDCL3  
 EXREF 7.26 ppm  
 BF 0.12 Hz  
 RGAIN 26

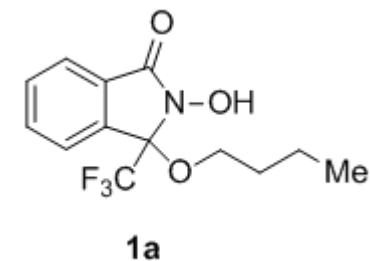



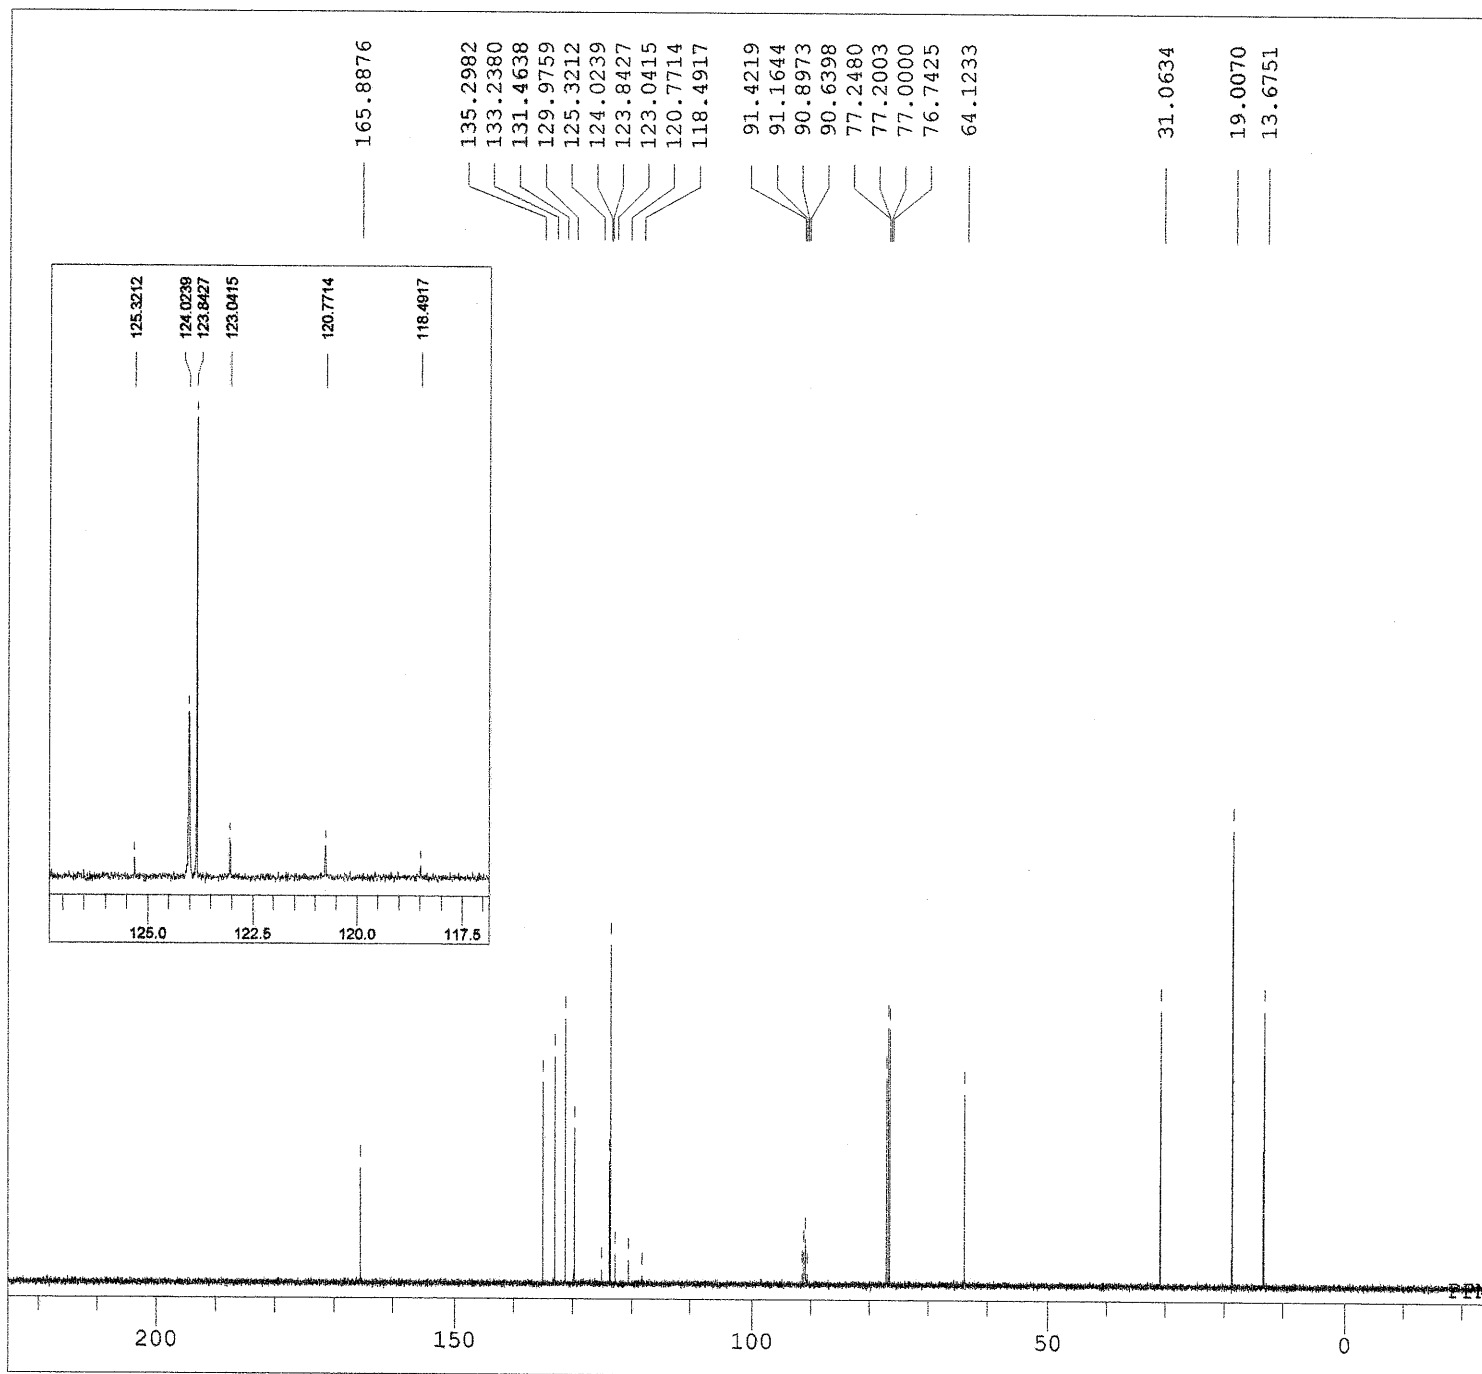

DFILE ozawa03-092\_13C.jdf  
 COMNT  
 DATIM 2013-11-14 19:53:44  
 OBNUC 13C  
 EXMOD carbon.jxp  
 OBFRQ 125.77 MHz  
 OBSET 7.87 KHz  
 OBFIN 4.21 Hz  
 POINT 32767  
 FREQU 39308.18 Hz  
 SCANS 160  
 ACQTM 0.8336 sec  
 PD 3.0000 sec  
 PW1 3.40 usec  
 IRNUC 1H  
 CTEMP 23.4 c  
 SLVNT CDCL3  
 EXREF 77.00 ppm  
 BF 0.12 Hz  
 RGAIN 60

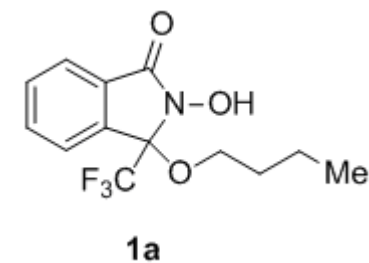

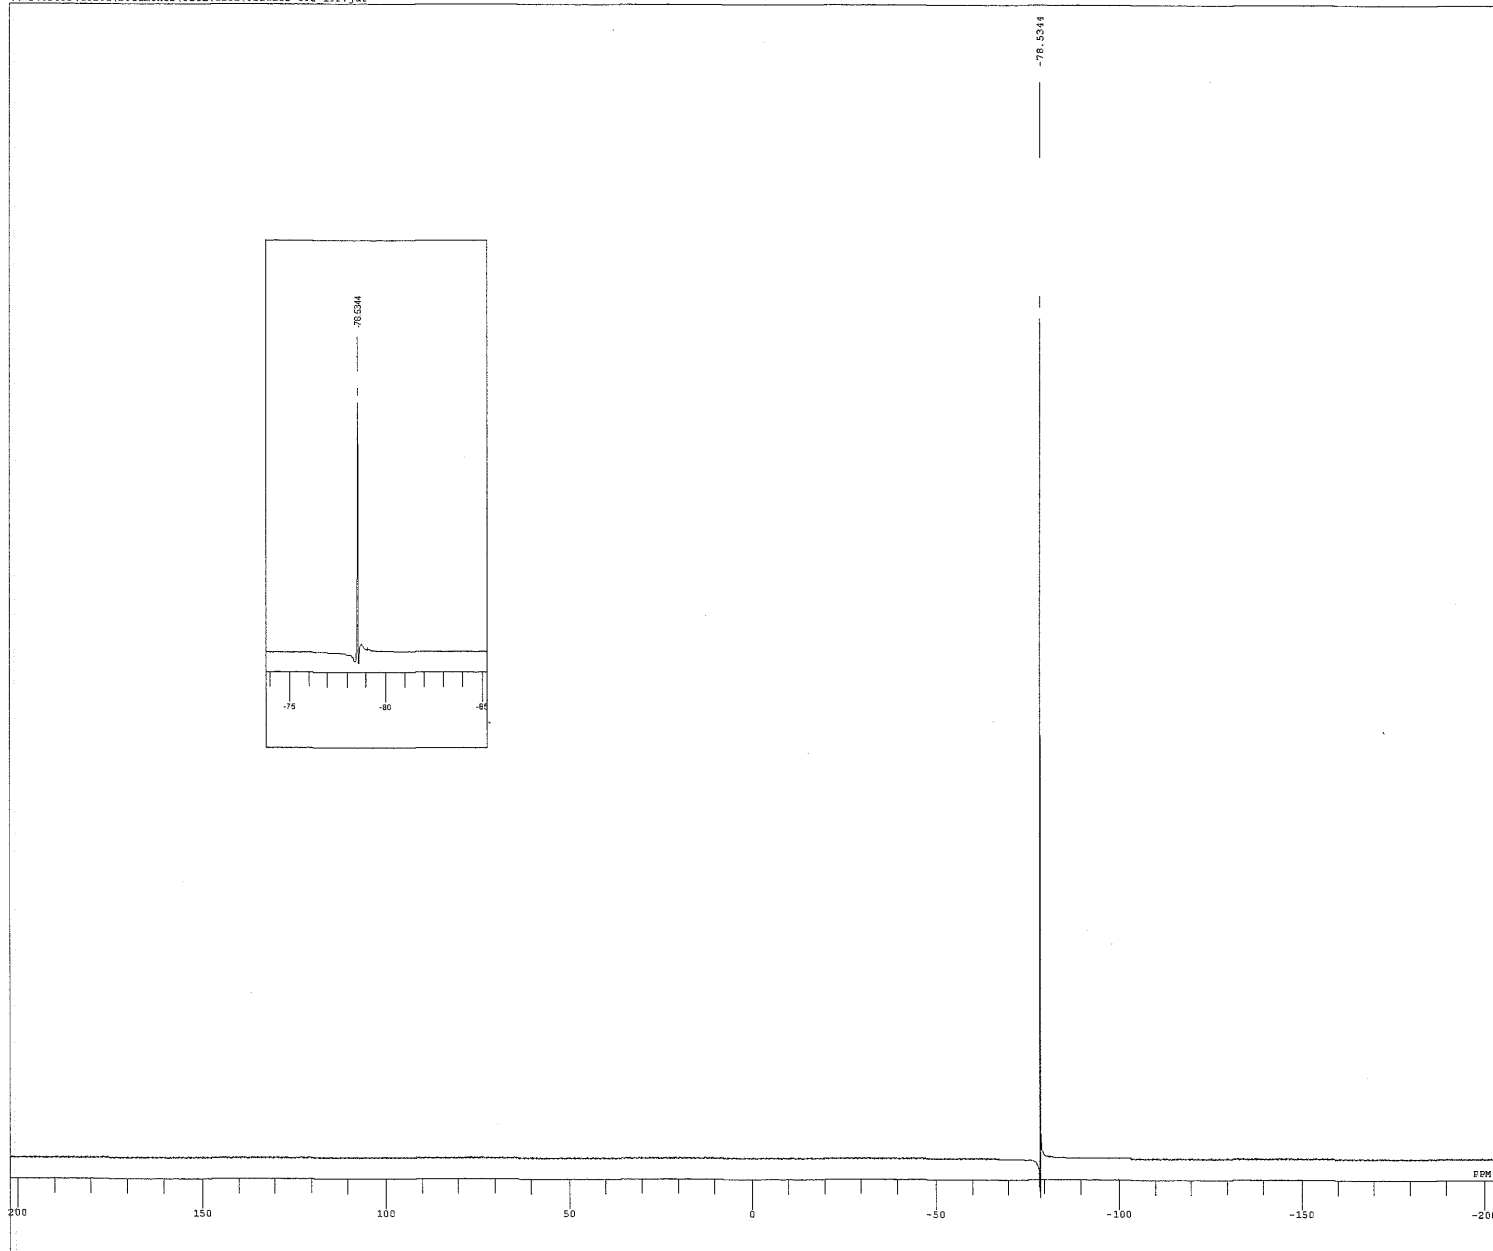

DFILE ozawa03-092\_19F.jdf  
CQMT  
DATIM 14-11-2013 20:23:21  
OBNUC 19F  
EXMGD proton\_3xp  
OBFRO 368.64 MHz  
OBSET 7.63 KHz  
OBFIN 2.95 Hz  
POINT 16294  
FREQU 106567.17 Hz  
SCANS 8  
ACQTM 0.0878 sec  
PD 5.0000 sec  
PW1 3.90 usec  
IRNUC 19F  
CTEHS  
SLANT CDCL3 23.0 c  
EXREF -164.90 ppm  
RF 6.12 Hz  
RGAIN 44

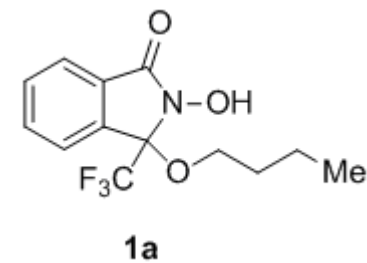

BuOH, [0]

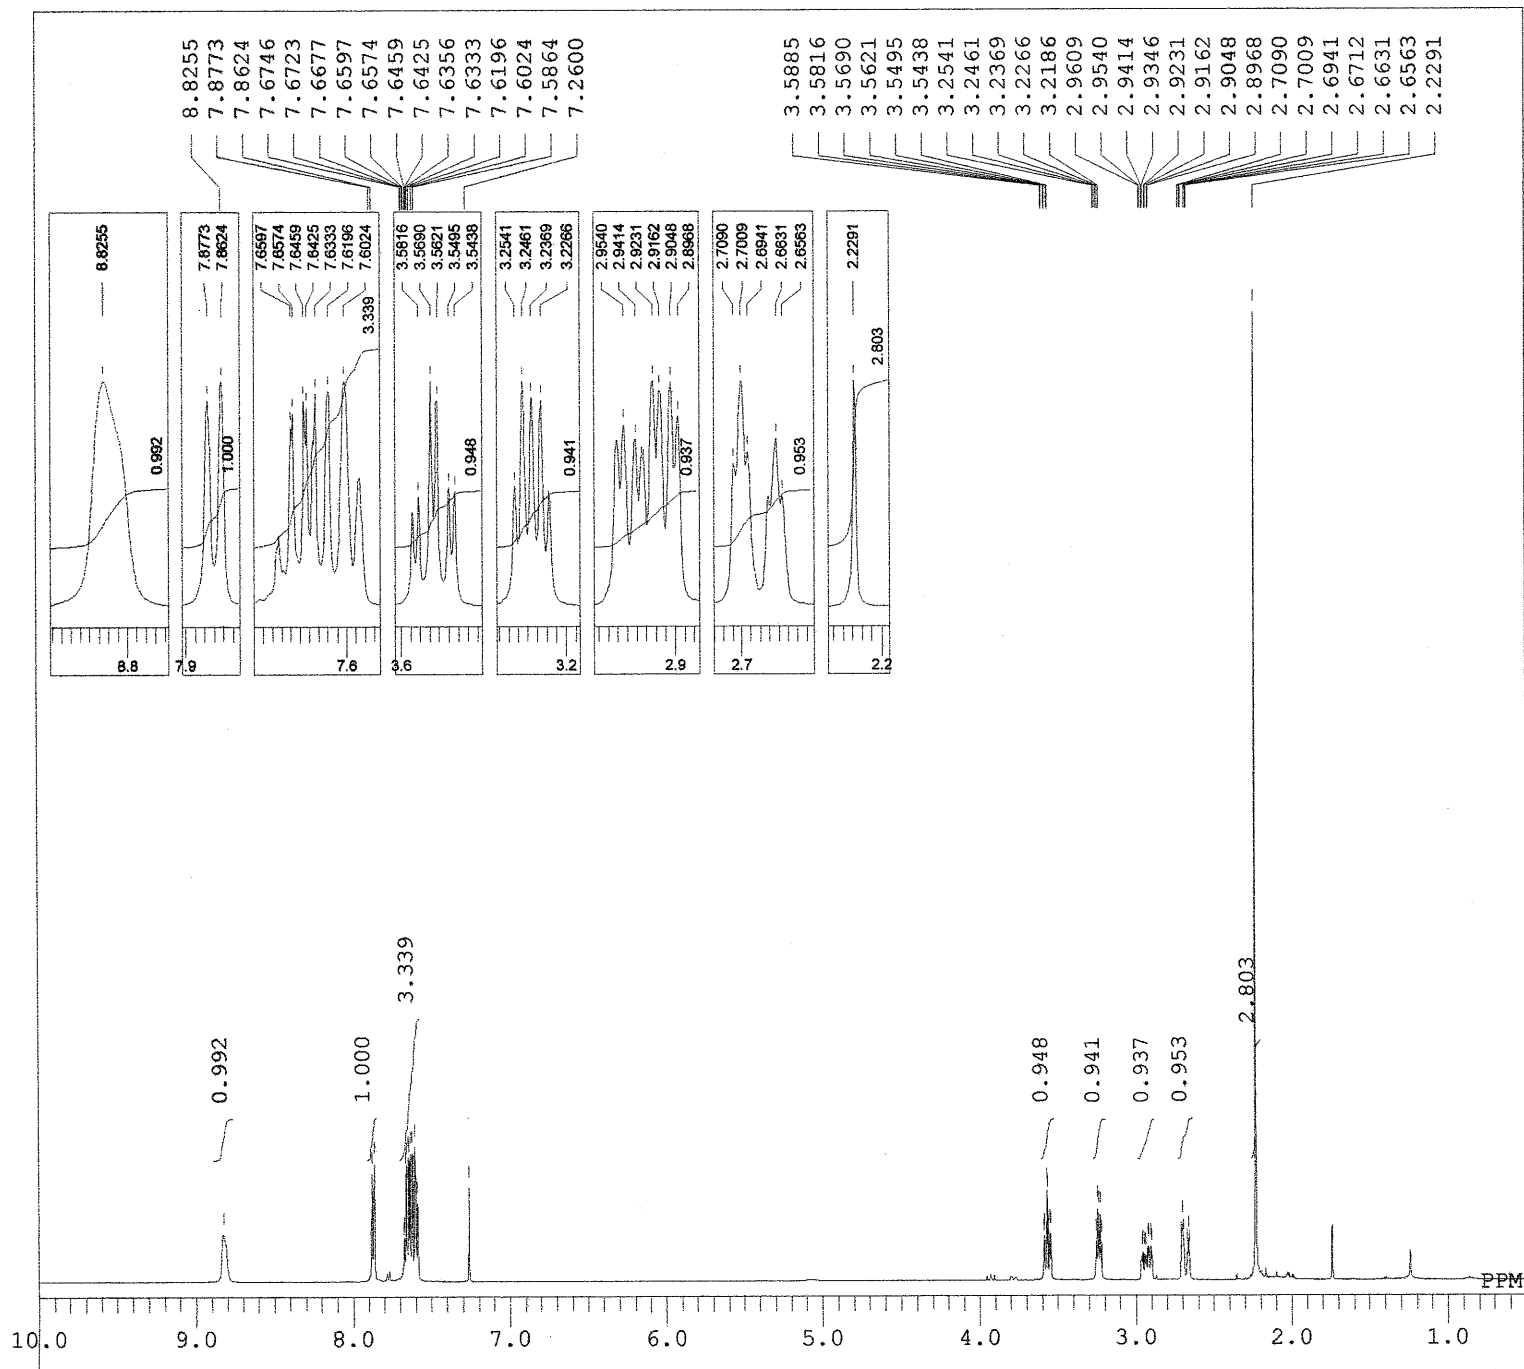

DFILE ozawa04-106\_1H.als  
COMNT BuOH, [0]  
DATIM 2014-01-21 11:59:18  
OBNUC 1H  
EXMOD proton.jxp  
OBFRQ 500.16 MHz  
OBSET 2.41 KHz  
OBFIN 6.01 Hz  
POINT 13107  
FREQU 7507.51 Hz  
SCANS 4  
ACQTM 1.7459 sec  
PD 5.0000 sec  
PW1 5.55 usec  
IRNUC 1H  
CTEMP 21.3 c  
SLVNT CDCL3  
EXREF 7.26 ppm  
BF 0.12 Hz  
RGAIN 36

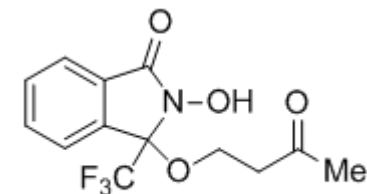

2a

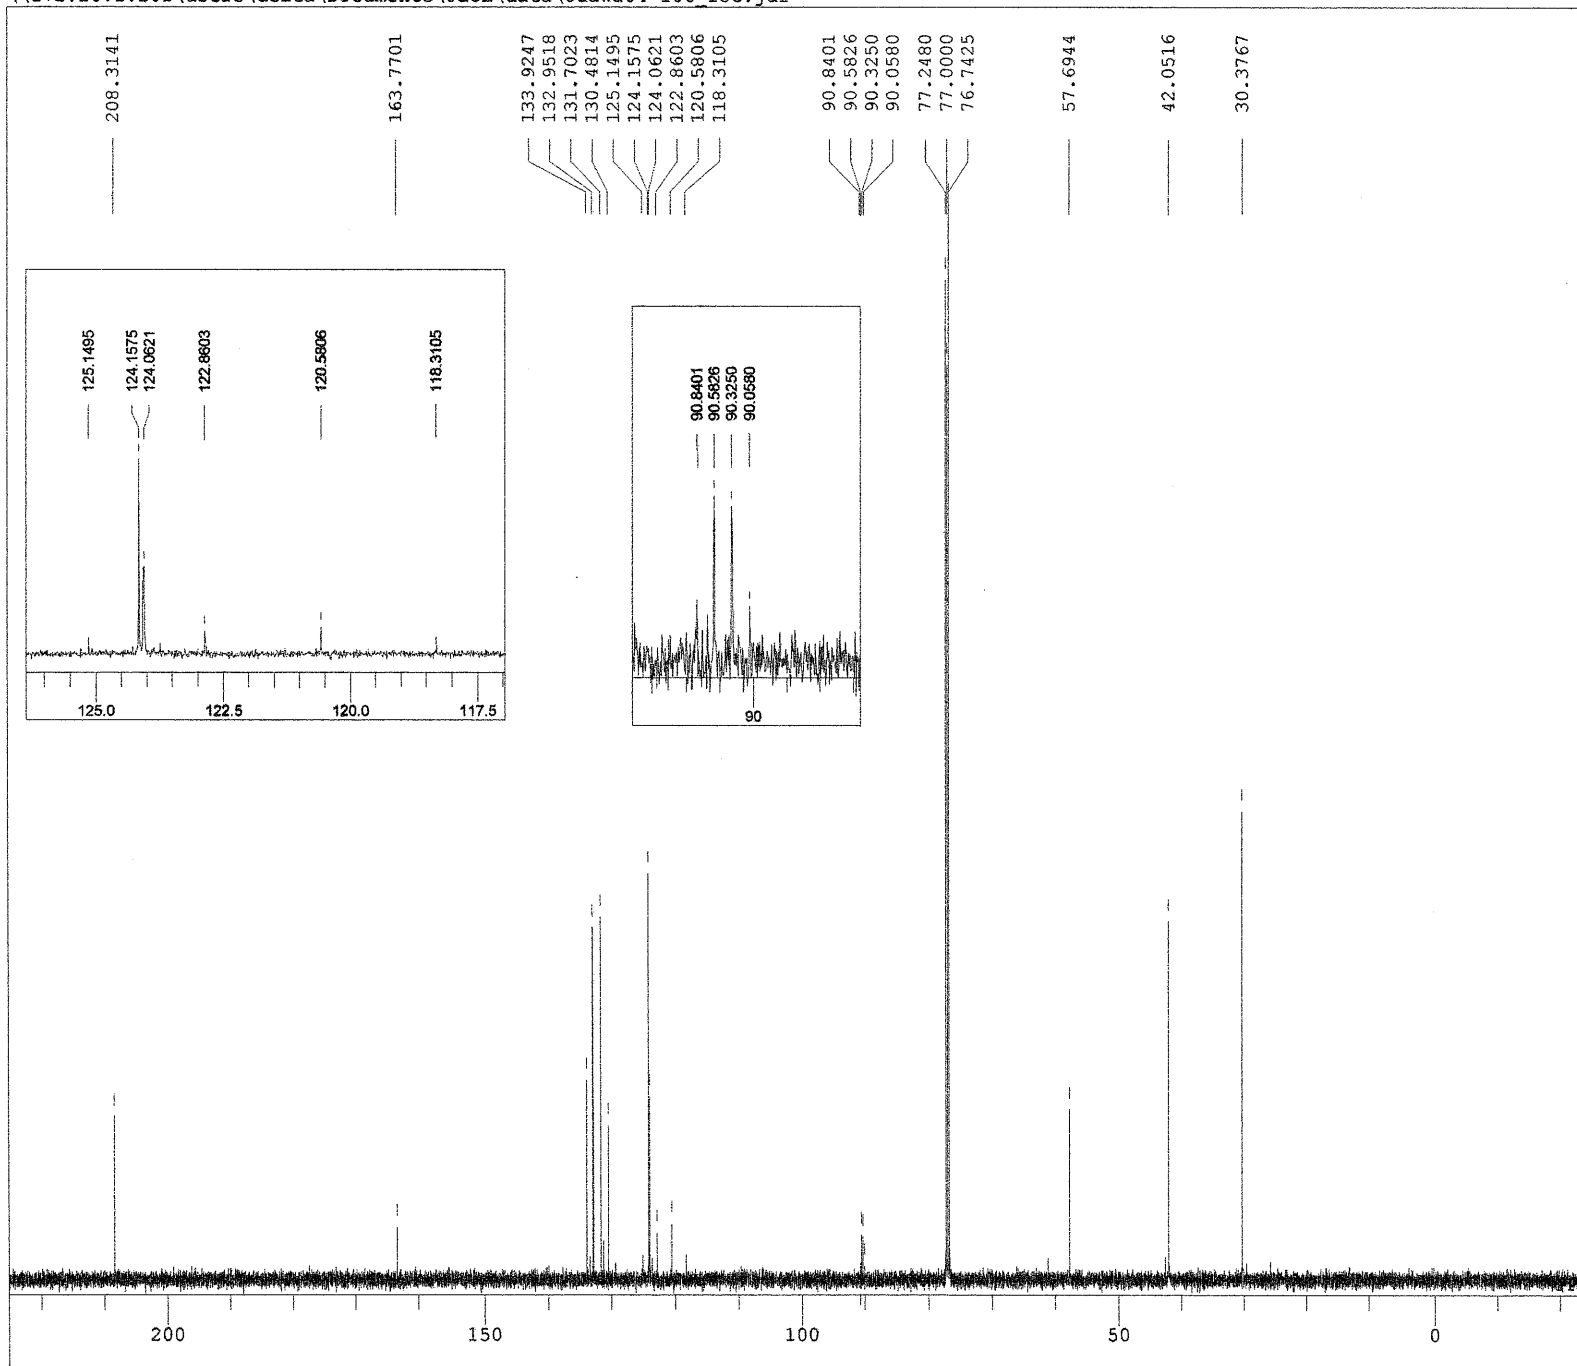

DFILE ozawa04-106\_13C.jdf  
 COMNT BuOH, O2  
 DATIM 2014-01-21 12:00:35  
 OBNUC 13C  
 EXMOD carbon.jxp  
 OBFREQ 125.77 MHz  
 OBSET 7.87 KHz  
 OBFIN 4.21 Hz  
 POINT 32767  
 FREQU 39308.18 Hz  
 SCANS 400  
 ACQTM 0.8336 sec  
 PD 3.0000 sec  
 PW1 3.40 usec  
 IRNUC 1H  
 CTEMP 21.9 c  
 SLVNT CDCL3  
 EXREF 77.00 ppm  
 BF 0.12 Hz  
 RGAIN 60

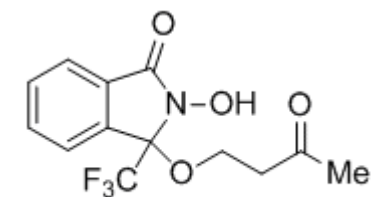

2a

BuOH, [0]

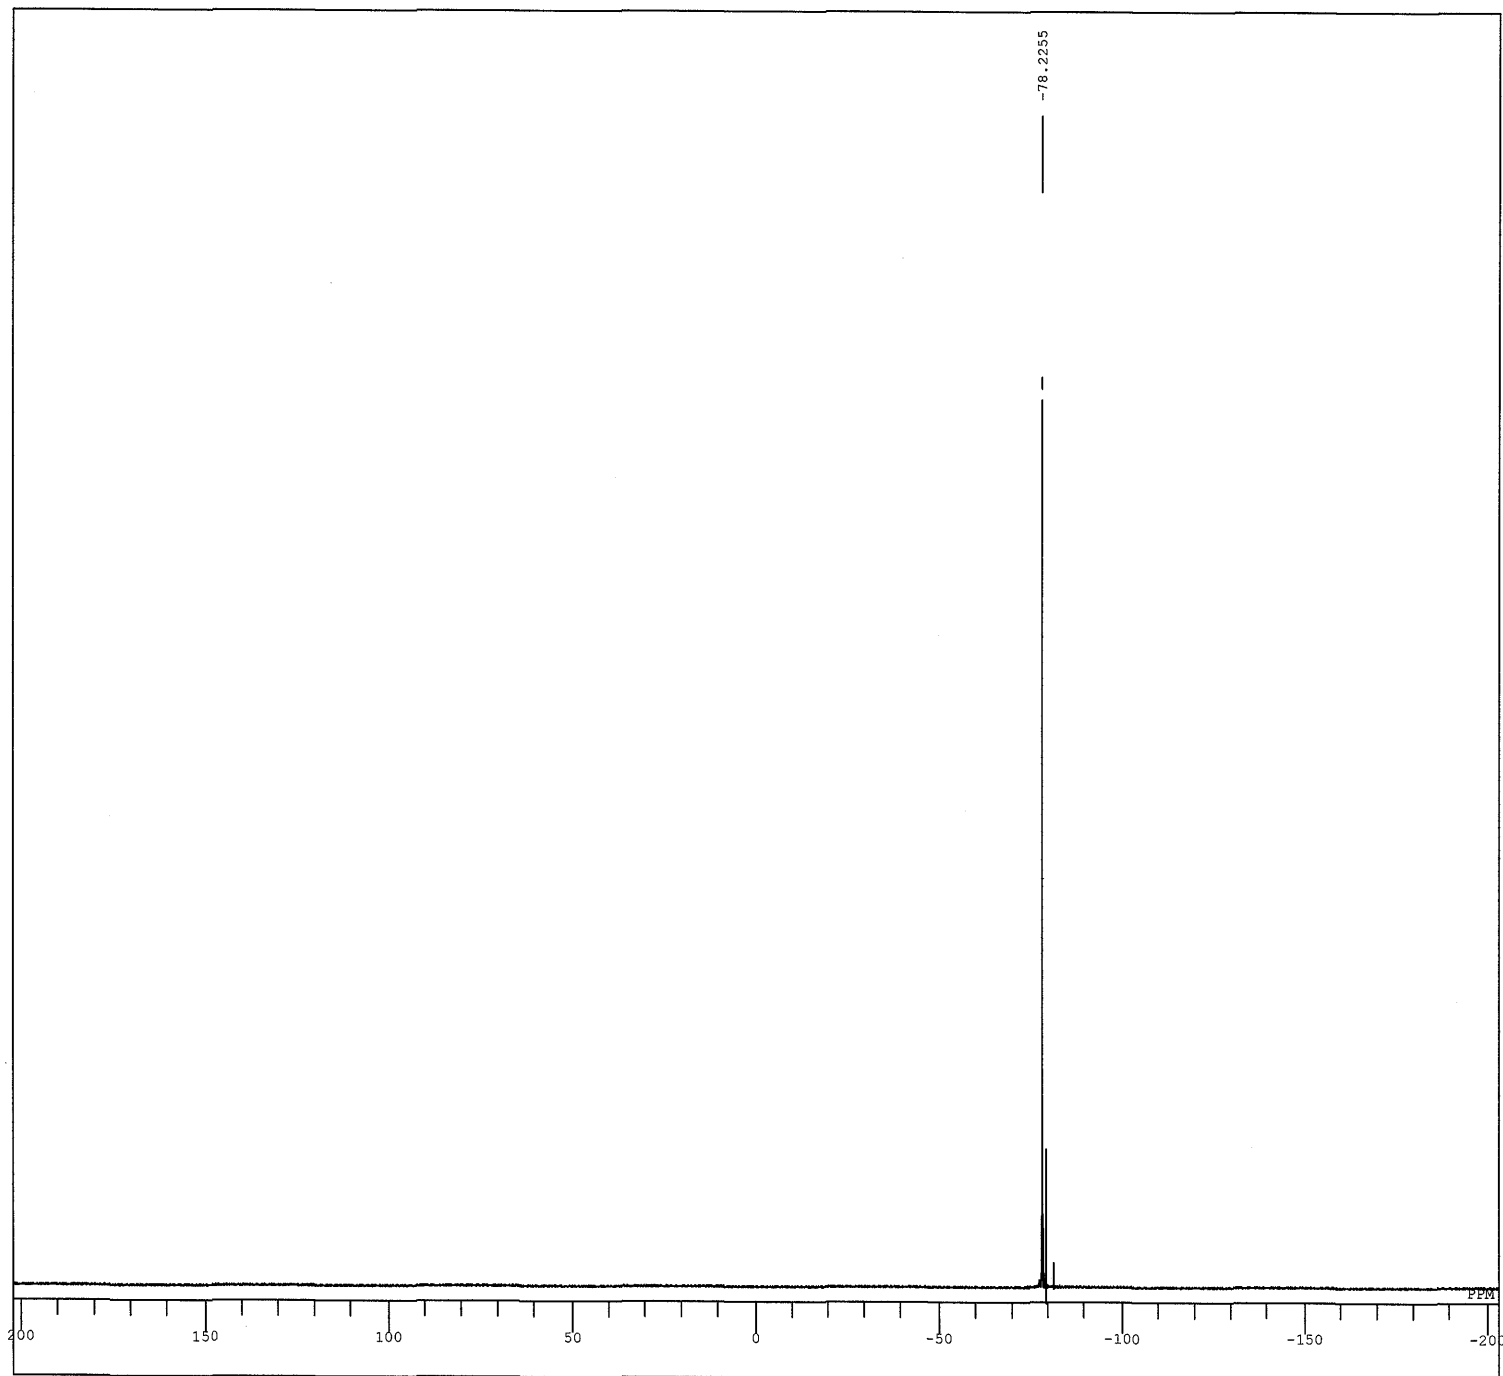

DFILE 2a\_ozawa04-106\_19F.jdf  
COMNT BuOH, [0]  
DATIM 21-01-2014 13:09:20  
OBNUC 19F  
EXMOD proton.jxp  
OBFRQ 368.64 MHz  
OBSEF 7.63 KHz  
OBFIN 2.85 Hz  
POINT 16384  
FREQU 186567.17 Hz  
SCANS 4  
ACQTM 0.0878 sec  
PD 5.0000 sec  
PW1 3.90 usec  
IRNUC 19F  
CTEMP 20.9 c  
SLVNT CDCL3  
EXREF -164.90 ppm  
BF 0.12 Hz  
RGAIN 46

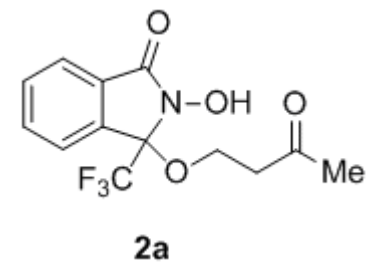

1,1-dMe-BuOH, Bn

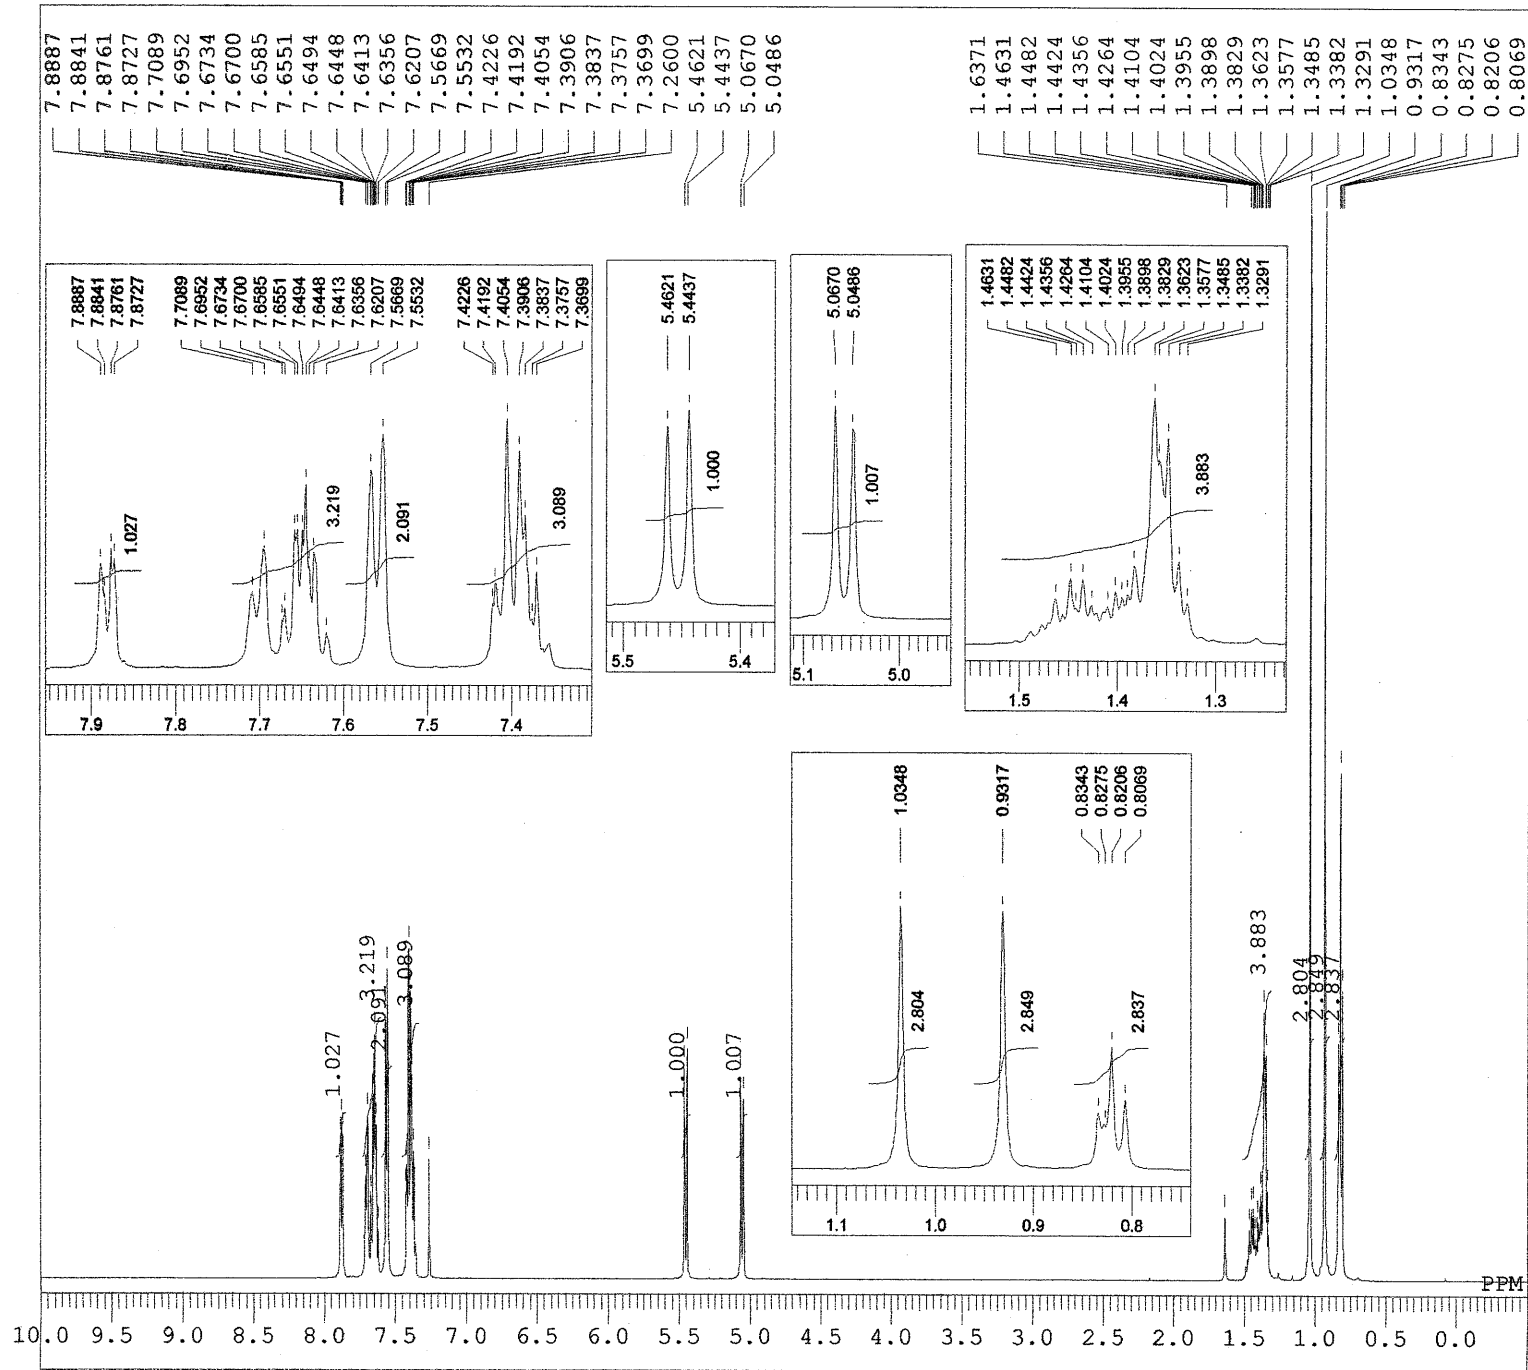

DFILE ozawa04-140\_1H.jdf  
 COMNT 1,1-dMe-BuOH, Bn  
 DATIM 2014-03-06 17:19:07  
 OBNUC 1H  
 EXMOD proton.jxp  
 OBFRQ 500.16 MHz  
 OBSET 2.41 KHz  
 OBFIN 6.01 Hz  
 POINT 16384  
 FREQU 9384.38 Hz  
 SCANS 4  
 ACQTM 1.7459 sec  
 PD 5.0000 sec  
 PW1 5.55 usec  
 IRNUC 1H  
 CTEMP 21.2 c  
 SLVNT CDCL3  
 EXREF 7.26 ppm  
 BF 1.00 Hz  
 RGAIN 34

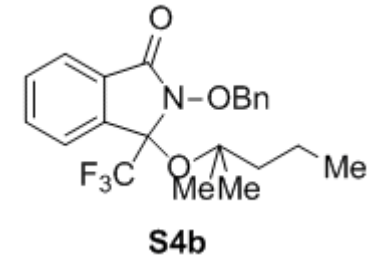

1, 1-dMe-BuOH, Bn

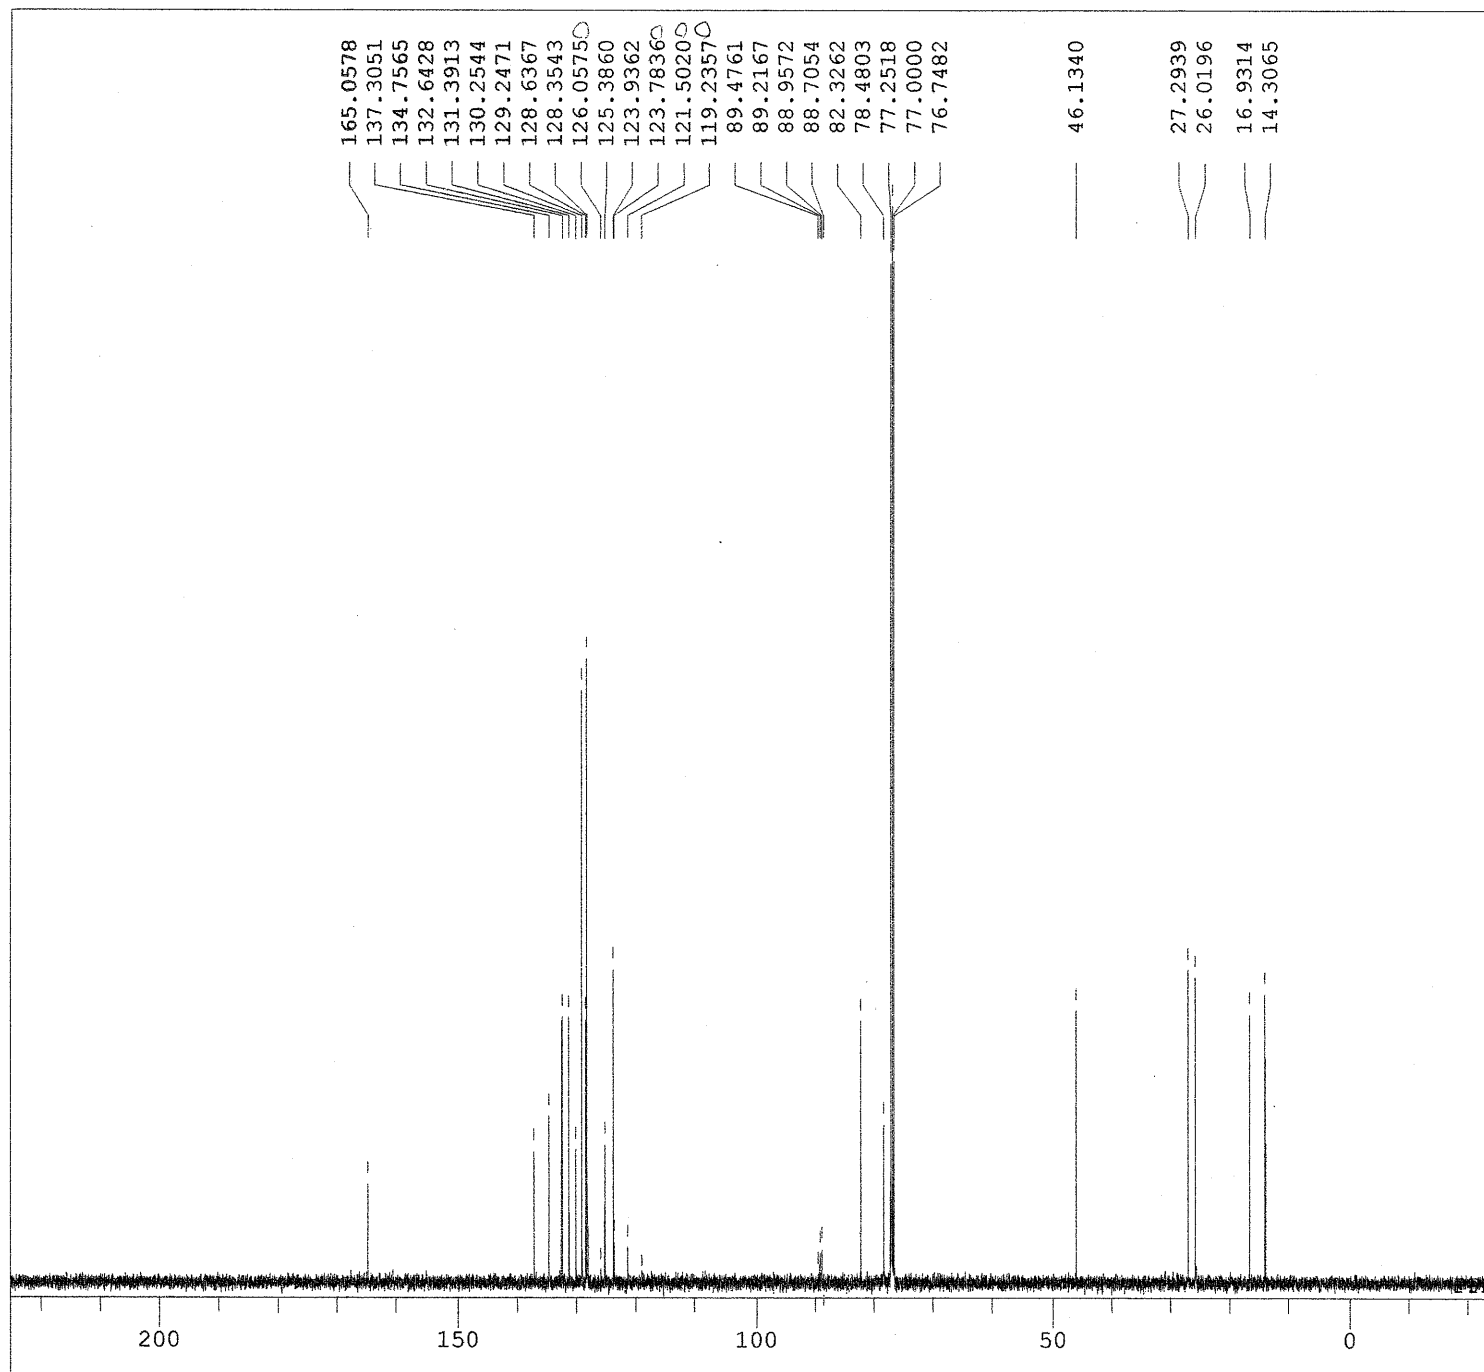

DFILE ozawa04-140\_13C.jdf  
COMNT 1,1-dMe-BuOH, Bn  
DATIM 2014-03-06 17:20:28  
OBNUC 13C  
EXMOD carbon.jxp  
OBFRQ 125.77 MHz  
OBSET 7.87 KHz  
OBFIN 4.21 Hz  
POINT 32768  
FREQU 31446.54 Hz  
SCANS 224  
ACQTM 1.0420 sec  
PD 3.0000 sec  
PW1 3.40 usec  
IRNUC 1H  
CTEMP 21.6 c  
SLVNT CDCL3  
EXREF 77.00 ppm  
BF 1.00 Hz  
RGAIN 72

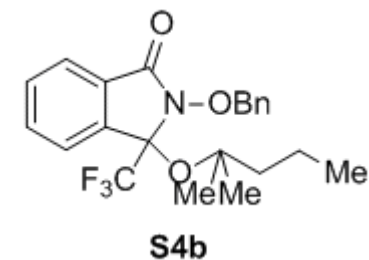

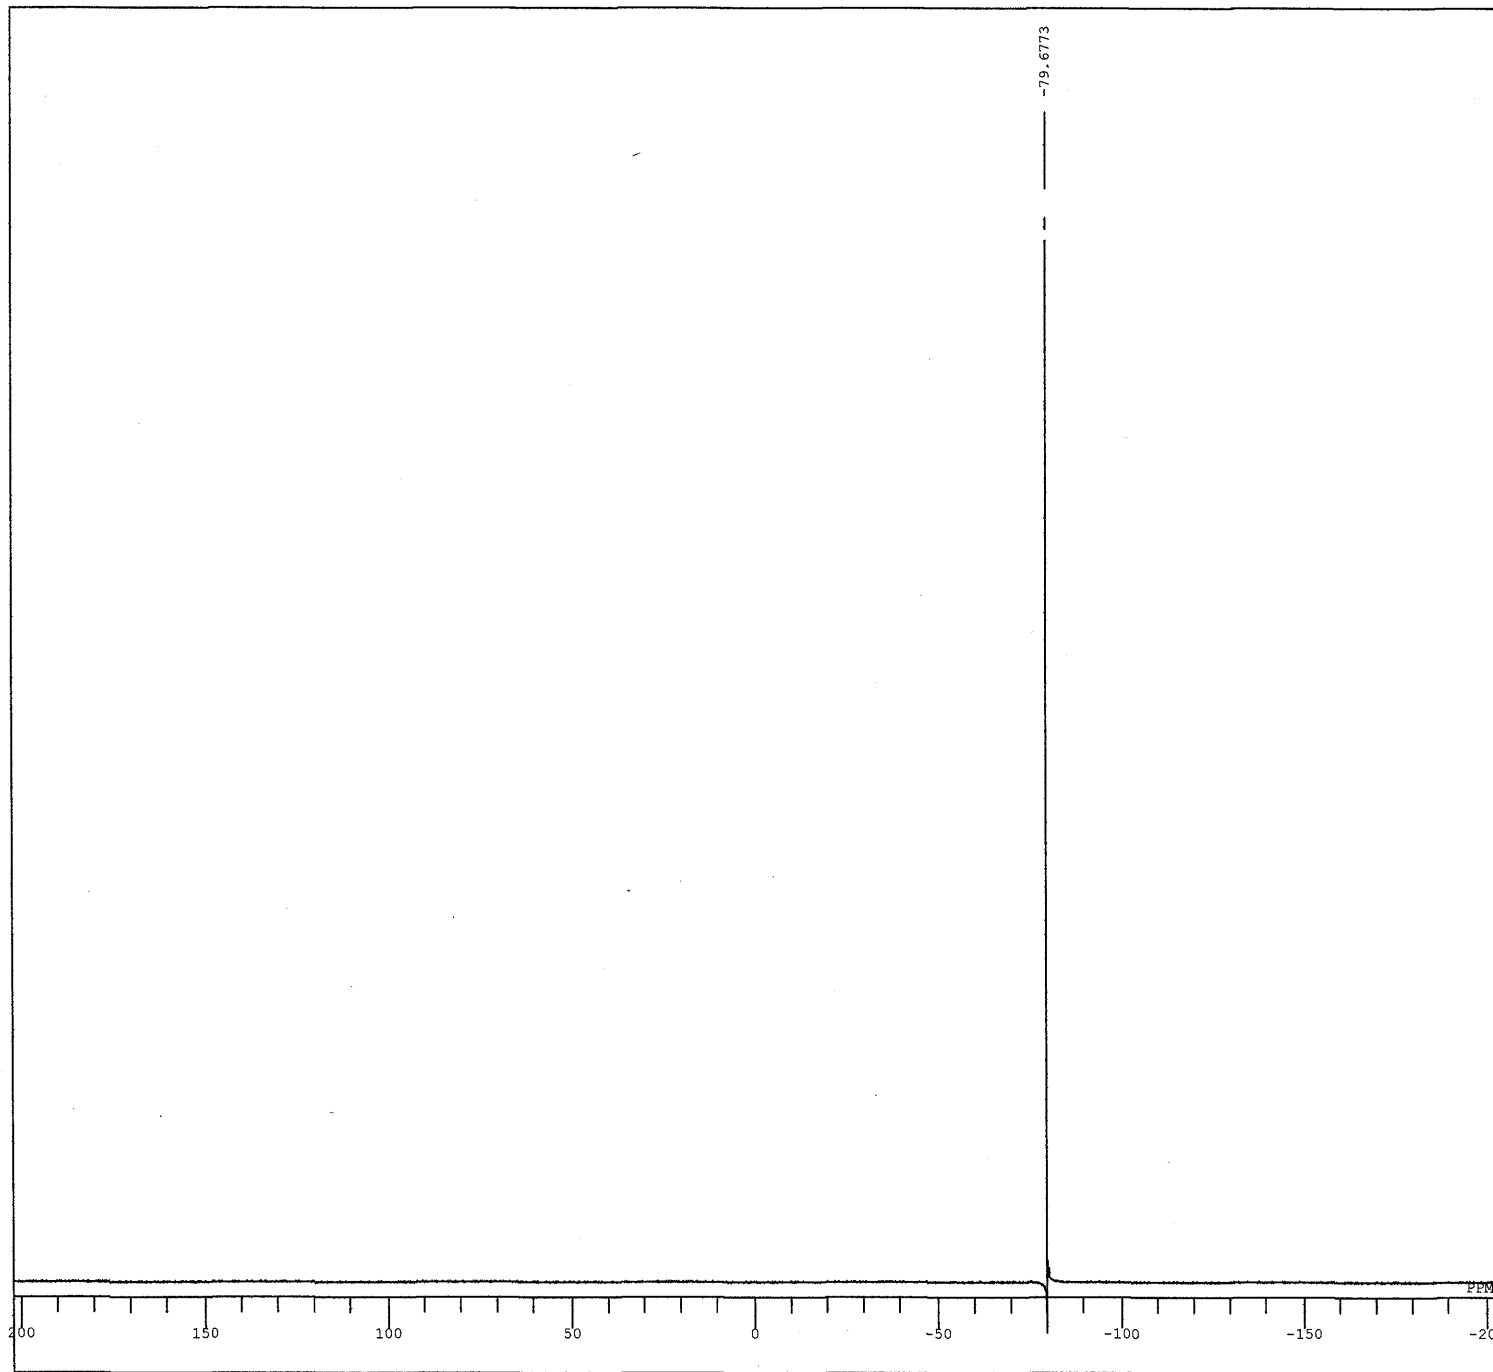

DFILE ozawa04-140\_19F.jdf  
COMNT 1,1-dMe-BuOH, Bn  
DATIM 06-03-2014 20:36:23  
OBNUC 19F  
EXMOD proton.jxp  
OBFRO 368.64 MHz  
OBSET 7.63 KHz  
OBFIN 2.85 Hz  
POINT 16384  
FREQU 186567.17 Hz  
SCANS 4  
ACQTM 0.0878 sec  
FD 5.0000 sec  
FW1 3.90 usec  
IRNUC 19F  
CTEMP 21.4 c  
SLVNT CDCL3  
EXREF -164.90 ppm  
BF 0.12 Hz  
RGAIN 48

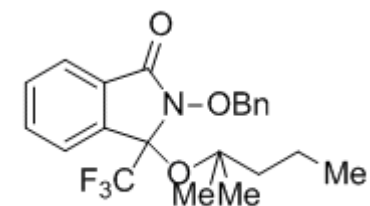

S4b



1, 1-dMe-BuOH, OH

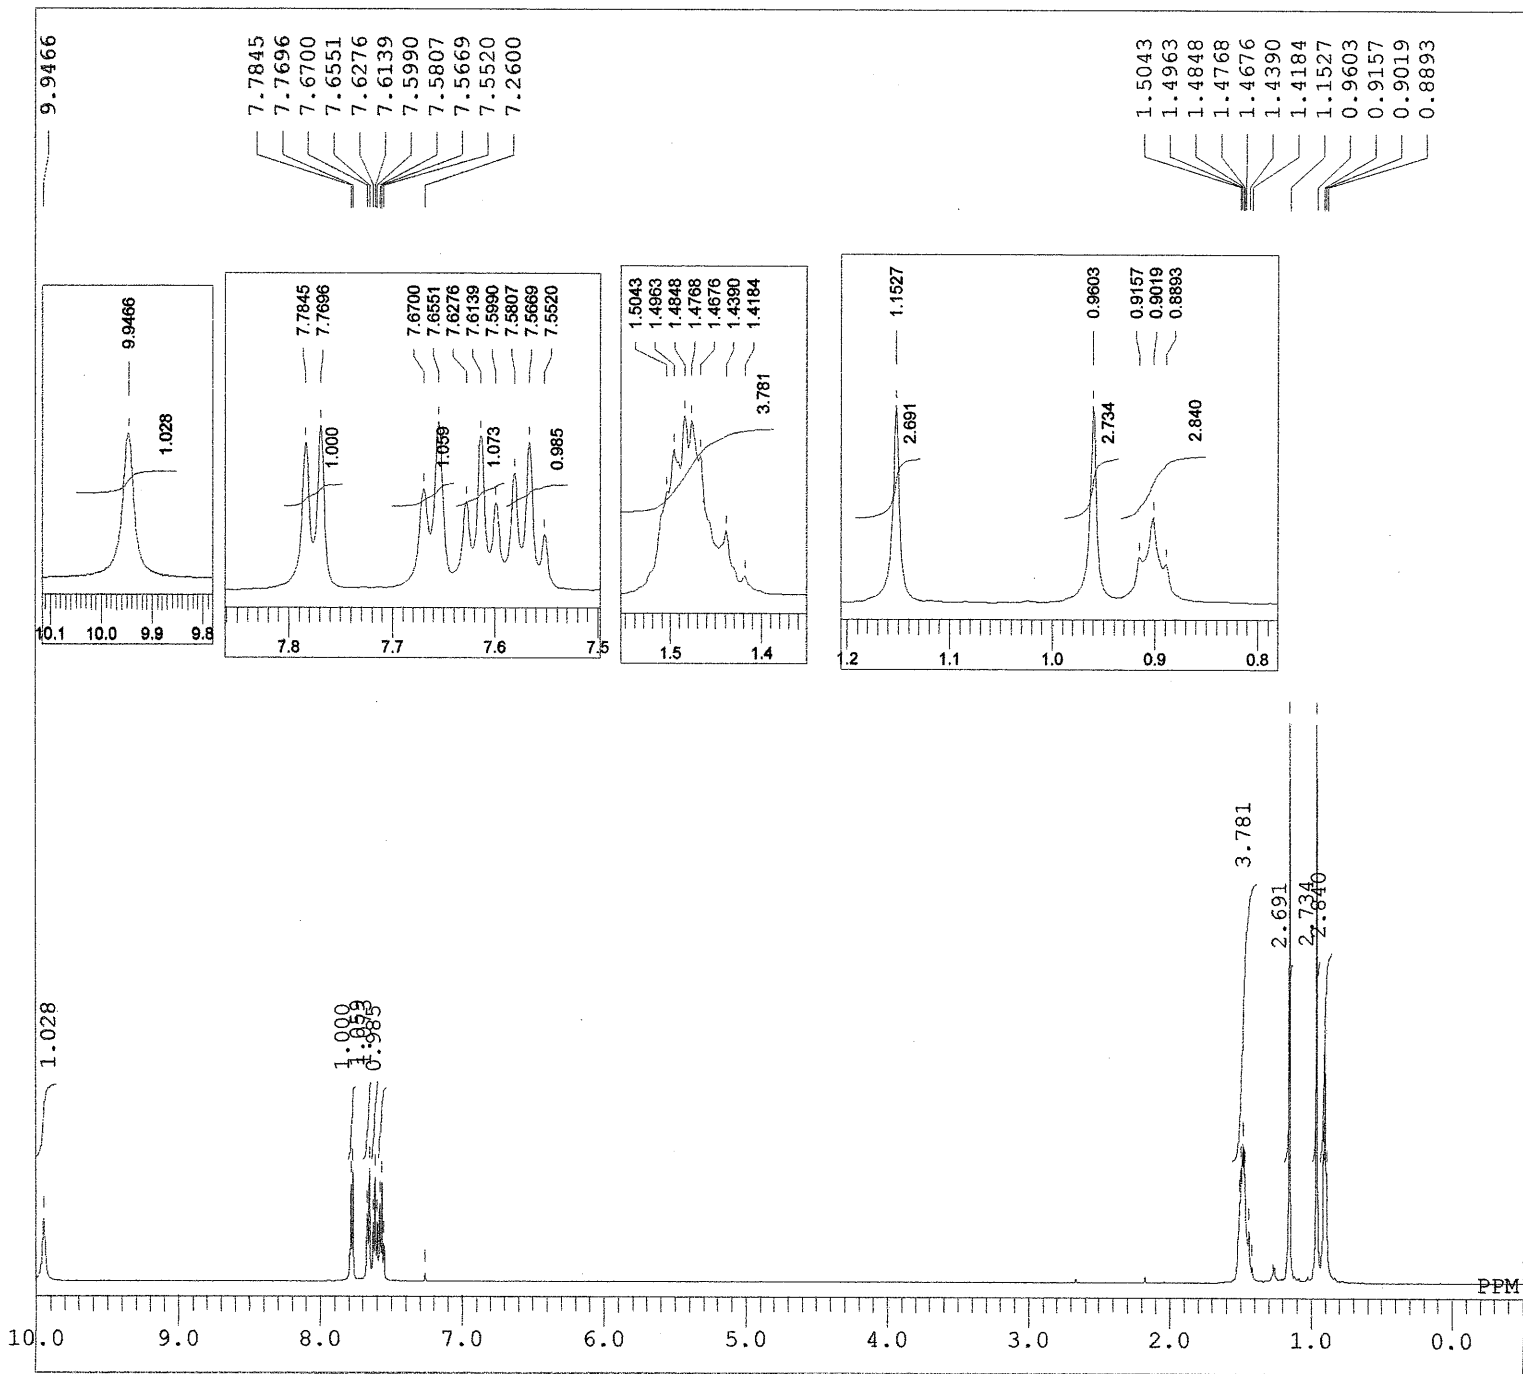

```

DFILE  ozawa04-143_1H.jdf
COMNT  1,1-dMe-BuOH, OH
DATIM  2014-03-06 17:10:23
OBNUC  1H
EXMOD  proton.jxp
OBFRQ   500.16 MHz
OBSET   2.41 KHz
OBFIN   6.01 Hz
POINT   16384
FREQU   9384.38 Hz
SCANS    4
ACQTM   1.7459 sec
PD       5.0000 sec
PW1      5.55 usec
IRNUC   1H
CTEMP   21.5 c
SLVNT   CDCL3
EXREF   7.26 ppm
BF       1.00 Hz
RGAIN    24
    
```

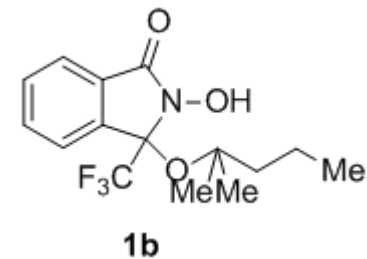

1, 1-dMe-BuOH, OH

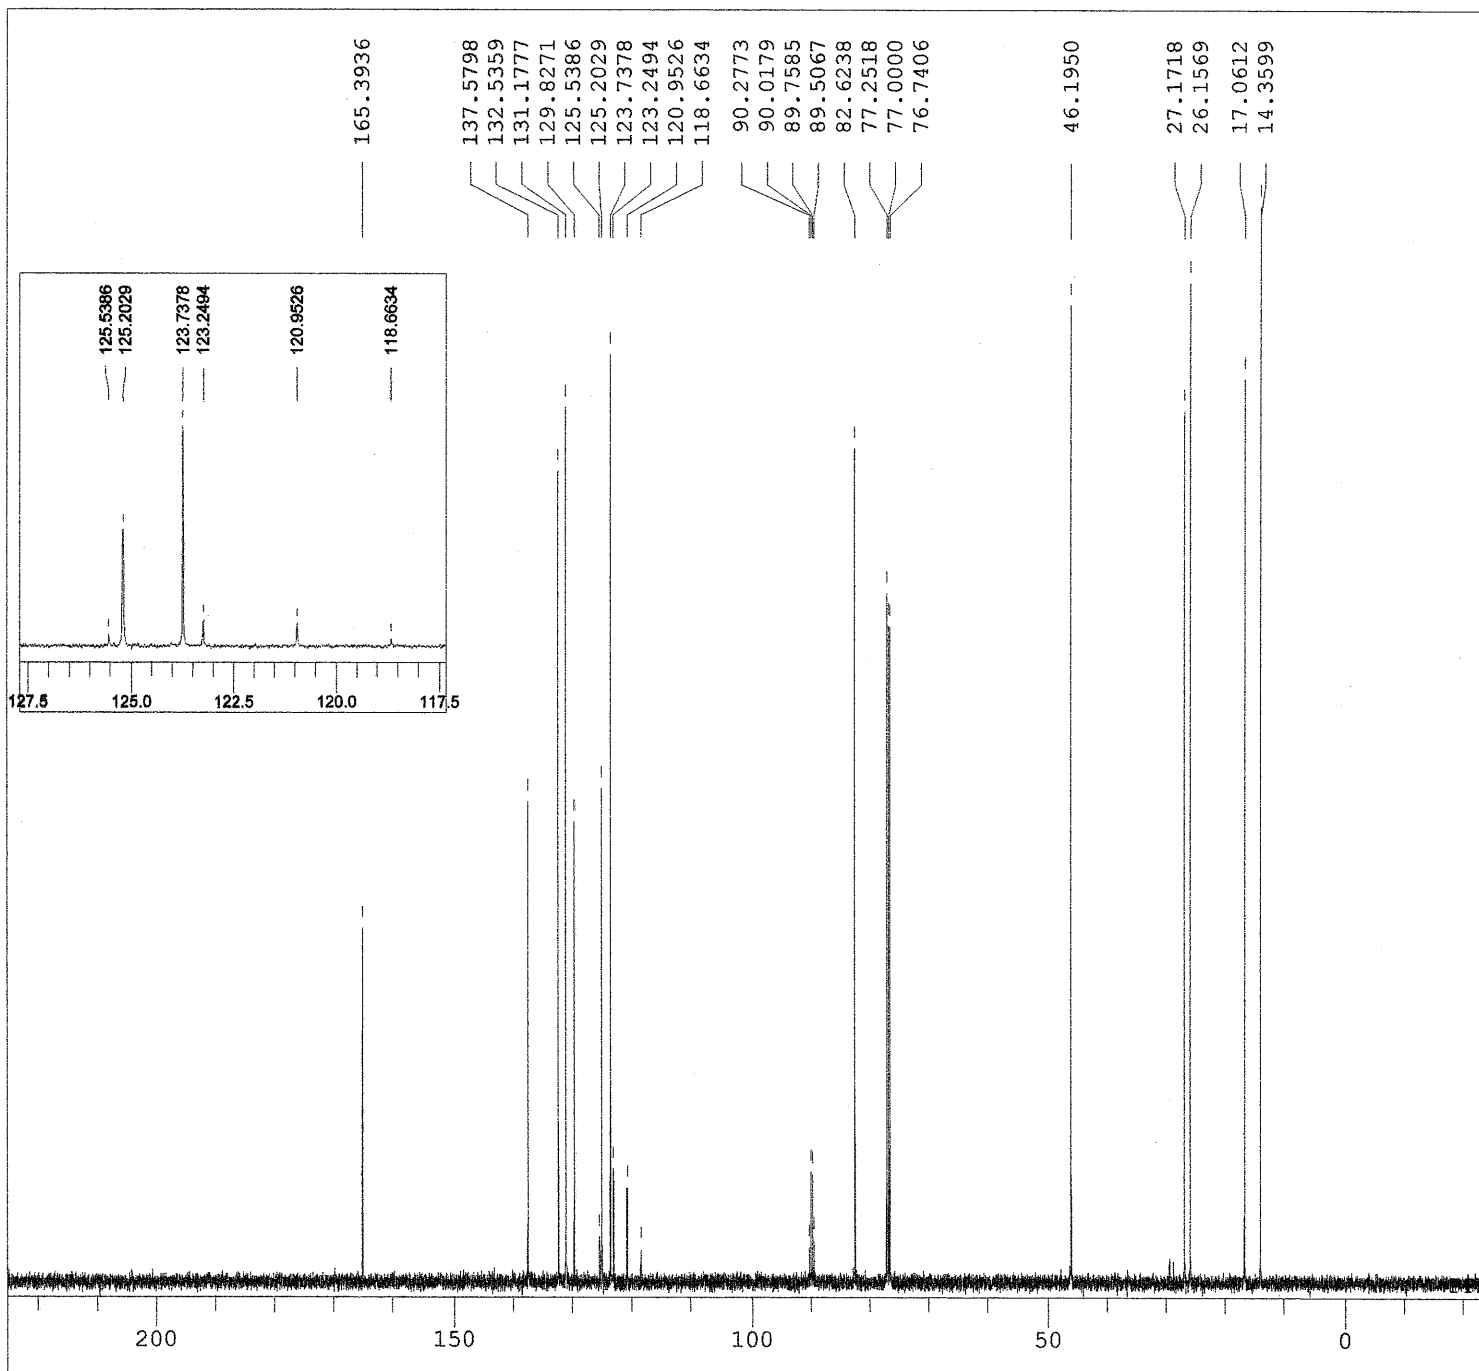

DFILE ozawa04-143\_13C.jdf  
COMNT 1,1-dMe-BuOH, OH  
DATIM 2014-03-06 17:11:34  
OBNUC 13C  
EXMOD carbon.jxp  
OBFRQ 125.77 MHz  
OBSET 7.87 KHz  
OBFIN 4.21 Hz  
POINT 32768  
FREQU 31446.54 Hz  
SCANS 64  
ACQTM 1.0420 sec  
PD 3.0000 sec  
PW1 3.40 usec  
IRNUC 1H  
CTEMP 21.3 c  
SLVNT CDCL3  
EXREF 77.00 ppm  
BF 1.00 Hz  
RGAIN 72

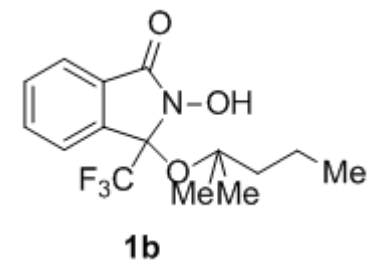

1, 1-dMe-BuOH, OH

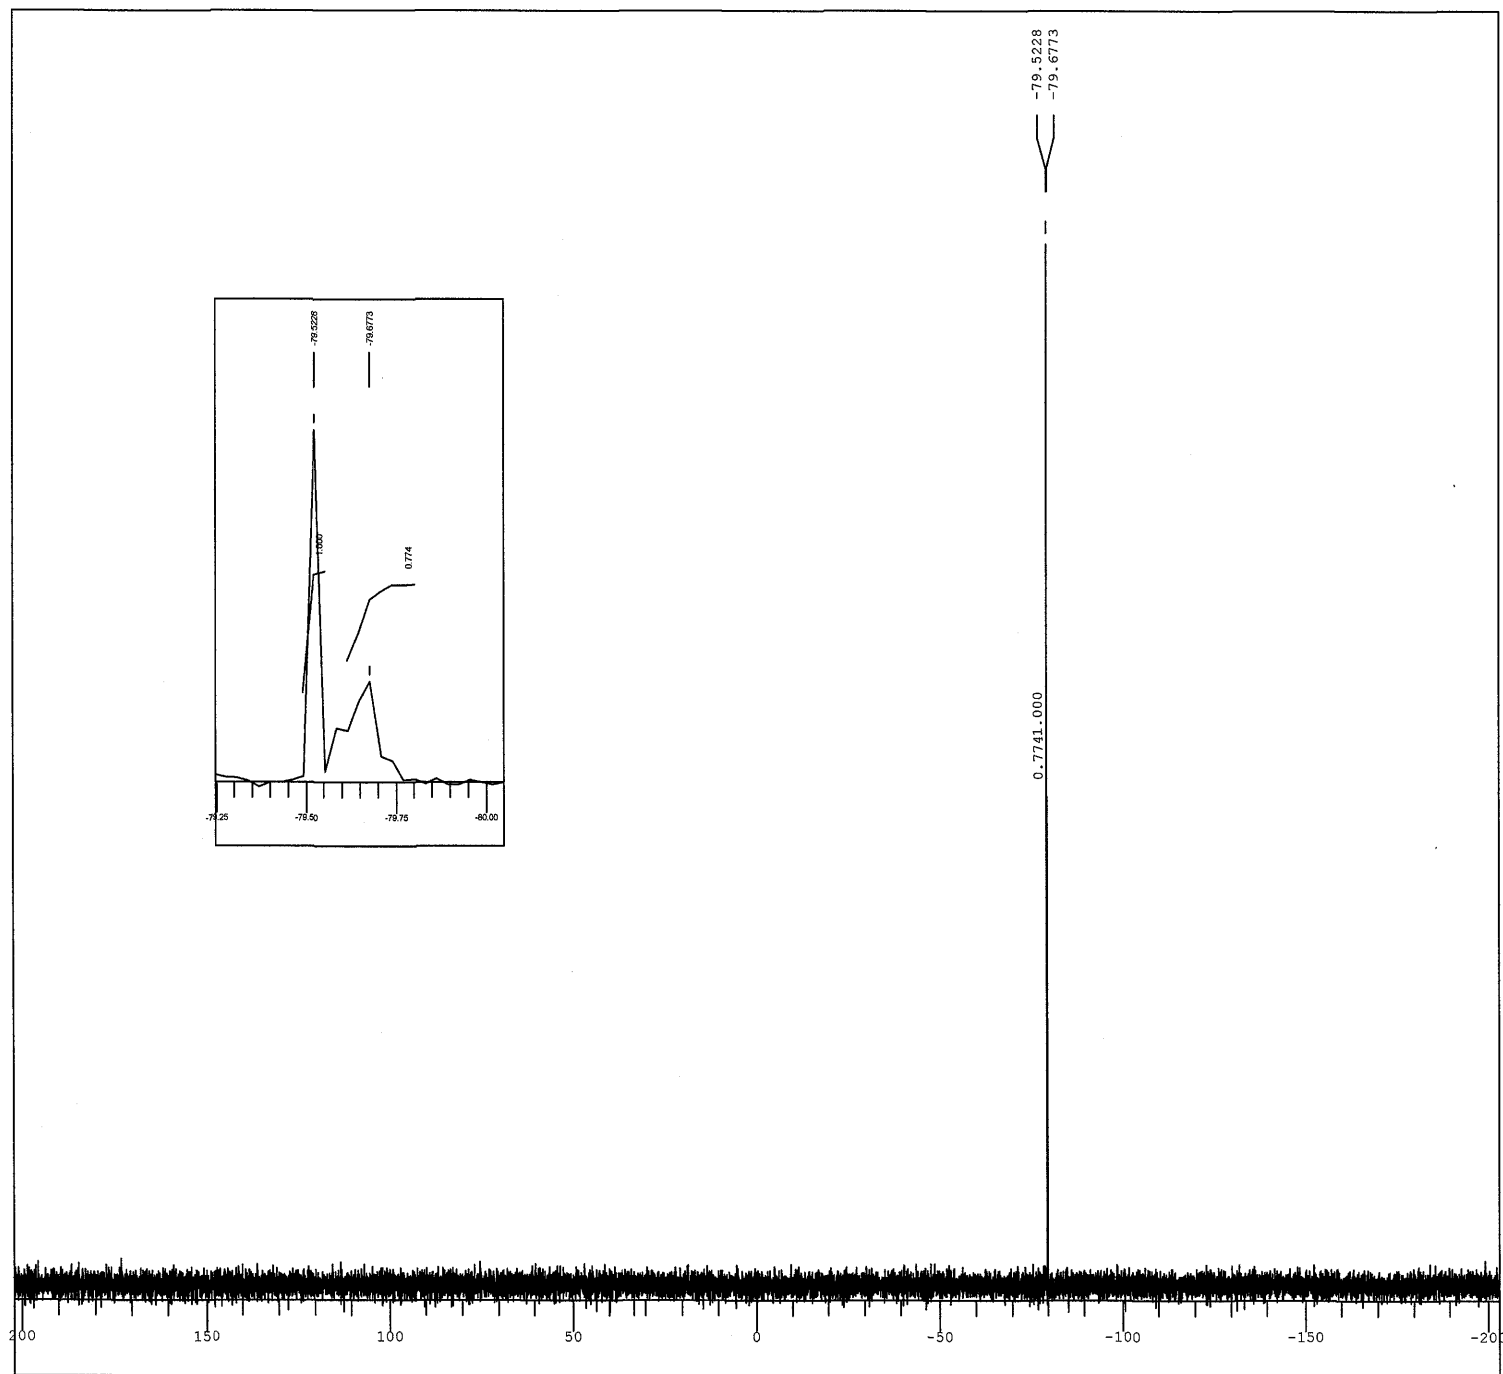

DFILE ozawa04-143\_19F.jdf  
COMNT 1,1-dMe-BuOH, OH  
DATIM 07-03-2014 17:33:56  
OBNUC 19F  
EXMOD proton.jxp  
OBFRQ 368.64 MHz  
OBSET 7.63 KHz  
OBFIN 2.85 Hz  
POINT 16384  
FREQU 186567.17 Hz  
SCANS 4  
ACQTM 0.0878 sec  
PD 5.0000 sec  
PW1 3.90 usec  
IRNUC 19F  
CTEMP 21.1 c  
SLVNT CDCL3  
EXREF -164.90 ppm  
BF 0.12 Hz  
RGAIN 50

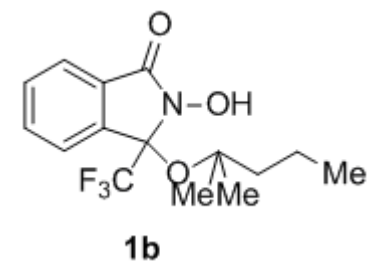

1, 1-dMe-BuOH, [O]

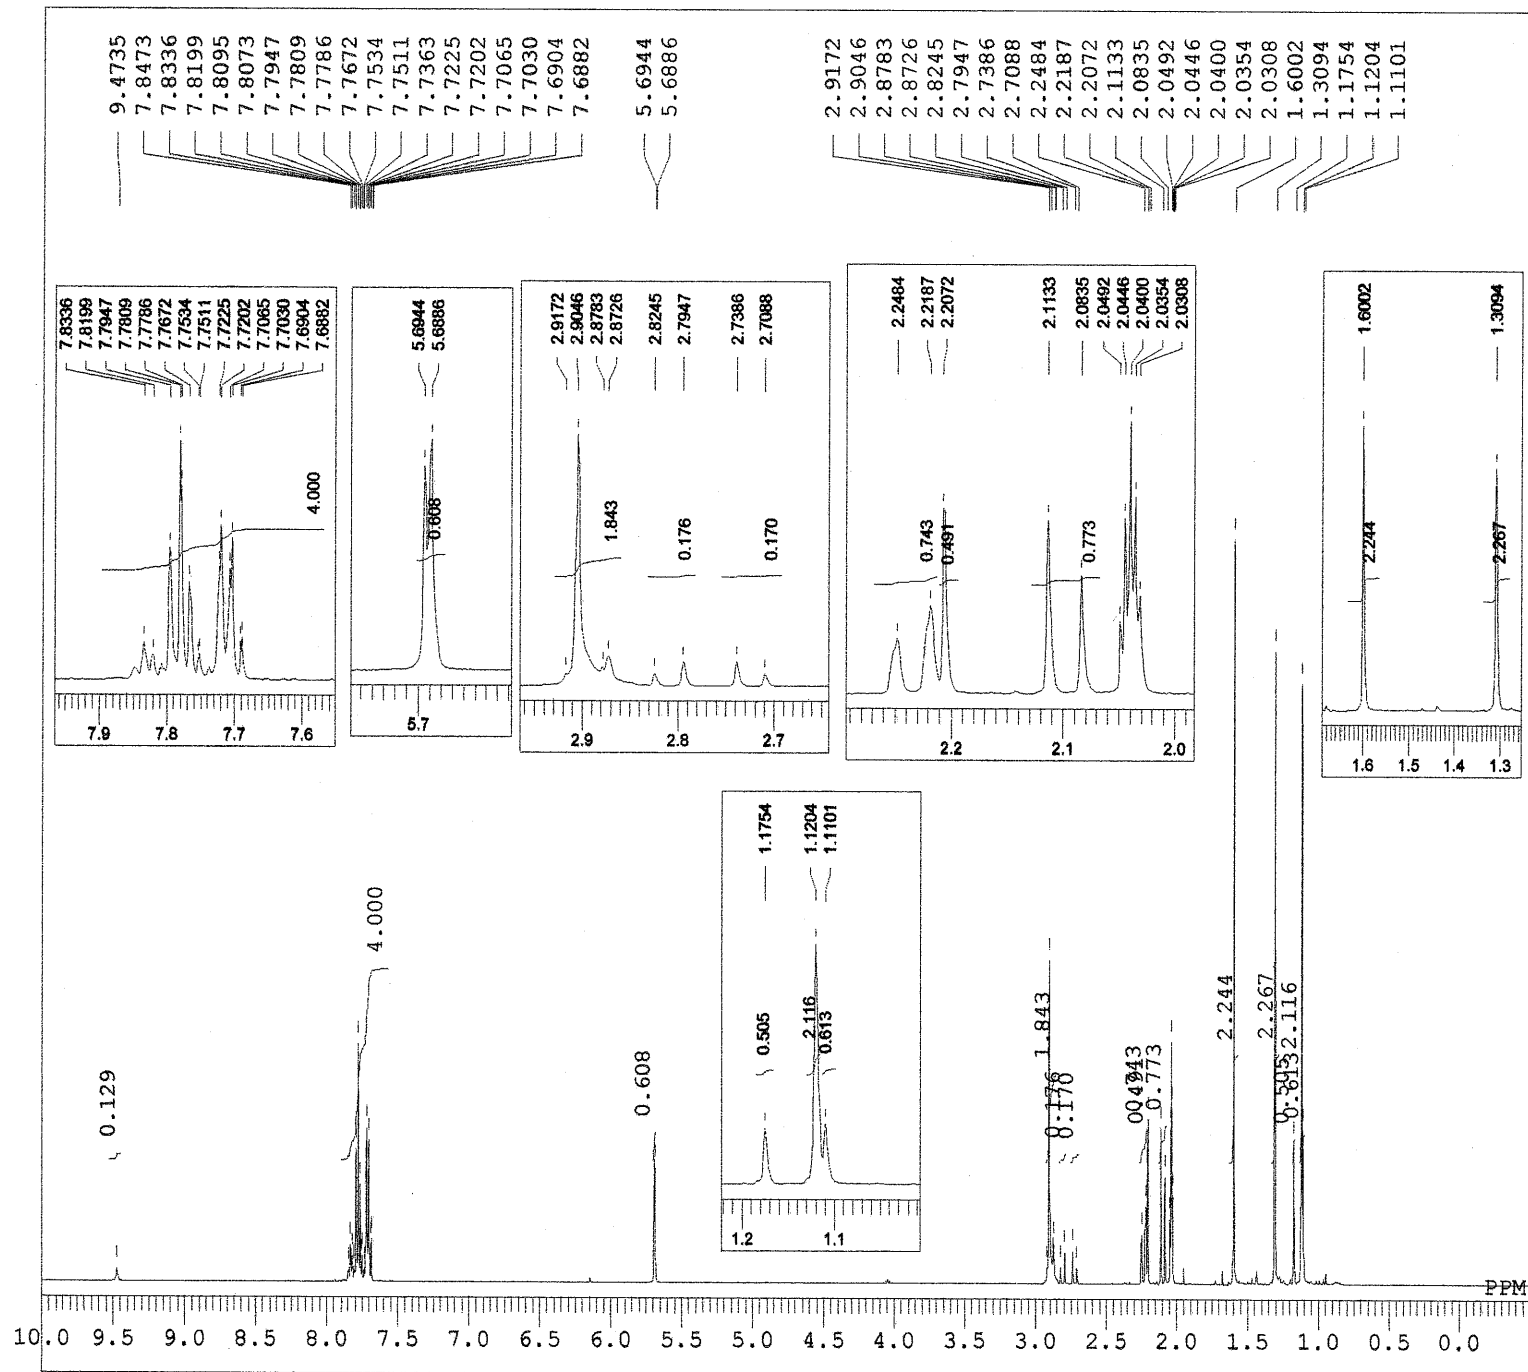

DFILE ozawa04-144 1.als  
 COMNT 1,1-dMe-BuOH, [O]  
 DATIM 2014-03-09 19:10:36  
 OBNUC 1H  
 EXMOD proton.jxp  
 OBFRQ 500.16 MHz  
 OBSET 2.41 KHz  
 OBFIN 6.01 Hz  
 POINT 13107  
 FREQU 7507.51 Hz  
 SCANS 4  
 ACQTM 1.7459 sec  
 PD 5.0000 sec  
 PW1 5.55 usec  
 IRNUC 1H  
 CTEMP 20.8 c  
 SLVNT ACETN  
 EXREF 2.04 ppm  
 BF 0.12 Hz  
 RGAIN 36

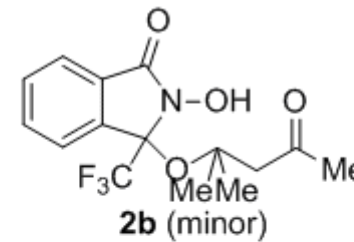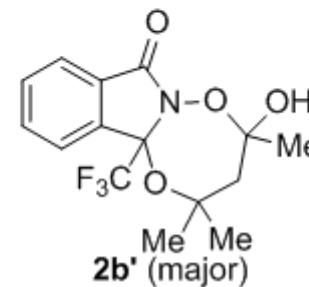

1, 1-dMe-BuOH, [O]

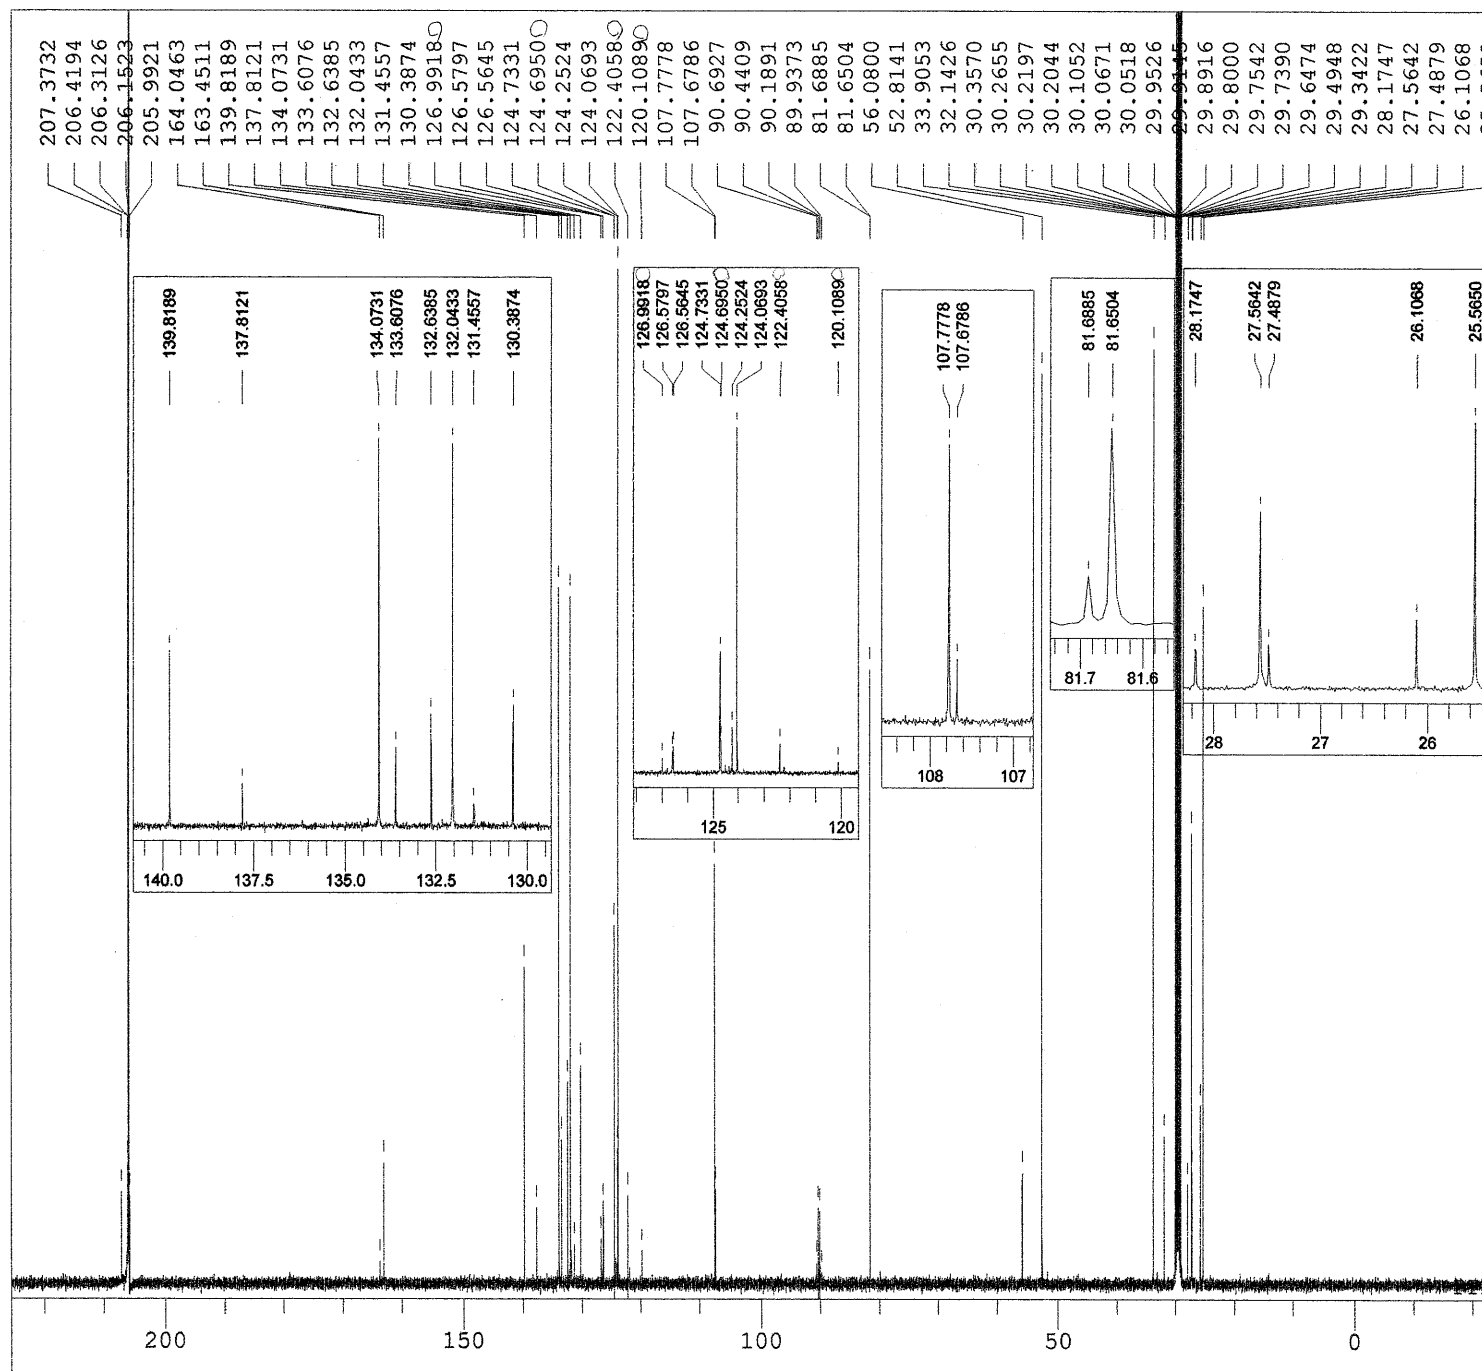

DFILE ozawa04-144\_1\_13C.jdf  
 COMNT 1,1-dMe-BuOH, [O]  
 DATIM 2014-03-09 20:54:37  
 OBNUC 13C  
 EXMOD carbon.jxp  
 OBFREQ 125.77 MHz  
 OBSSET 7.87 KHz  
 OBFIN 4.21 Hz  
 POINT 32768  
 FREQU 31446.54 Hz  
 SCANS 12093  
 ACQTM 1.0420 sec  
 PD 3.0000 sec  
 PW1 3.40 usec  
 IRNUC 1H  
 CTEMP 21.6 c  
 SLVNT ACETN  
 EXREF 29.80 ppm  
 BF 0.12 Hz  
 RGAIN 72

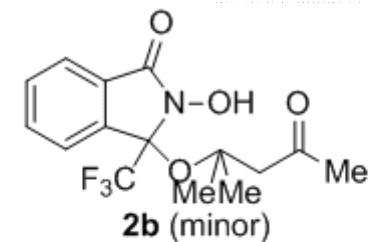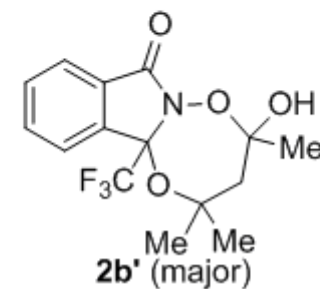

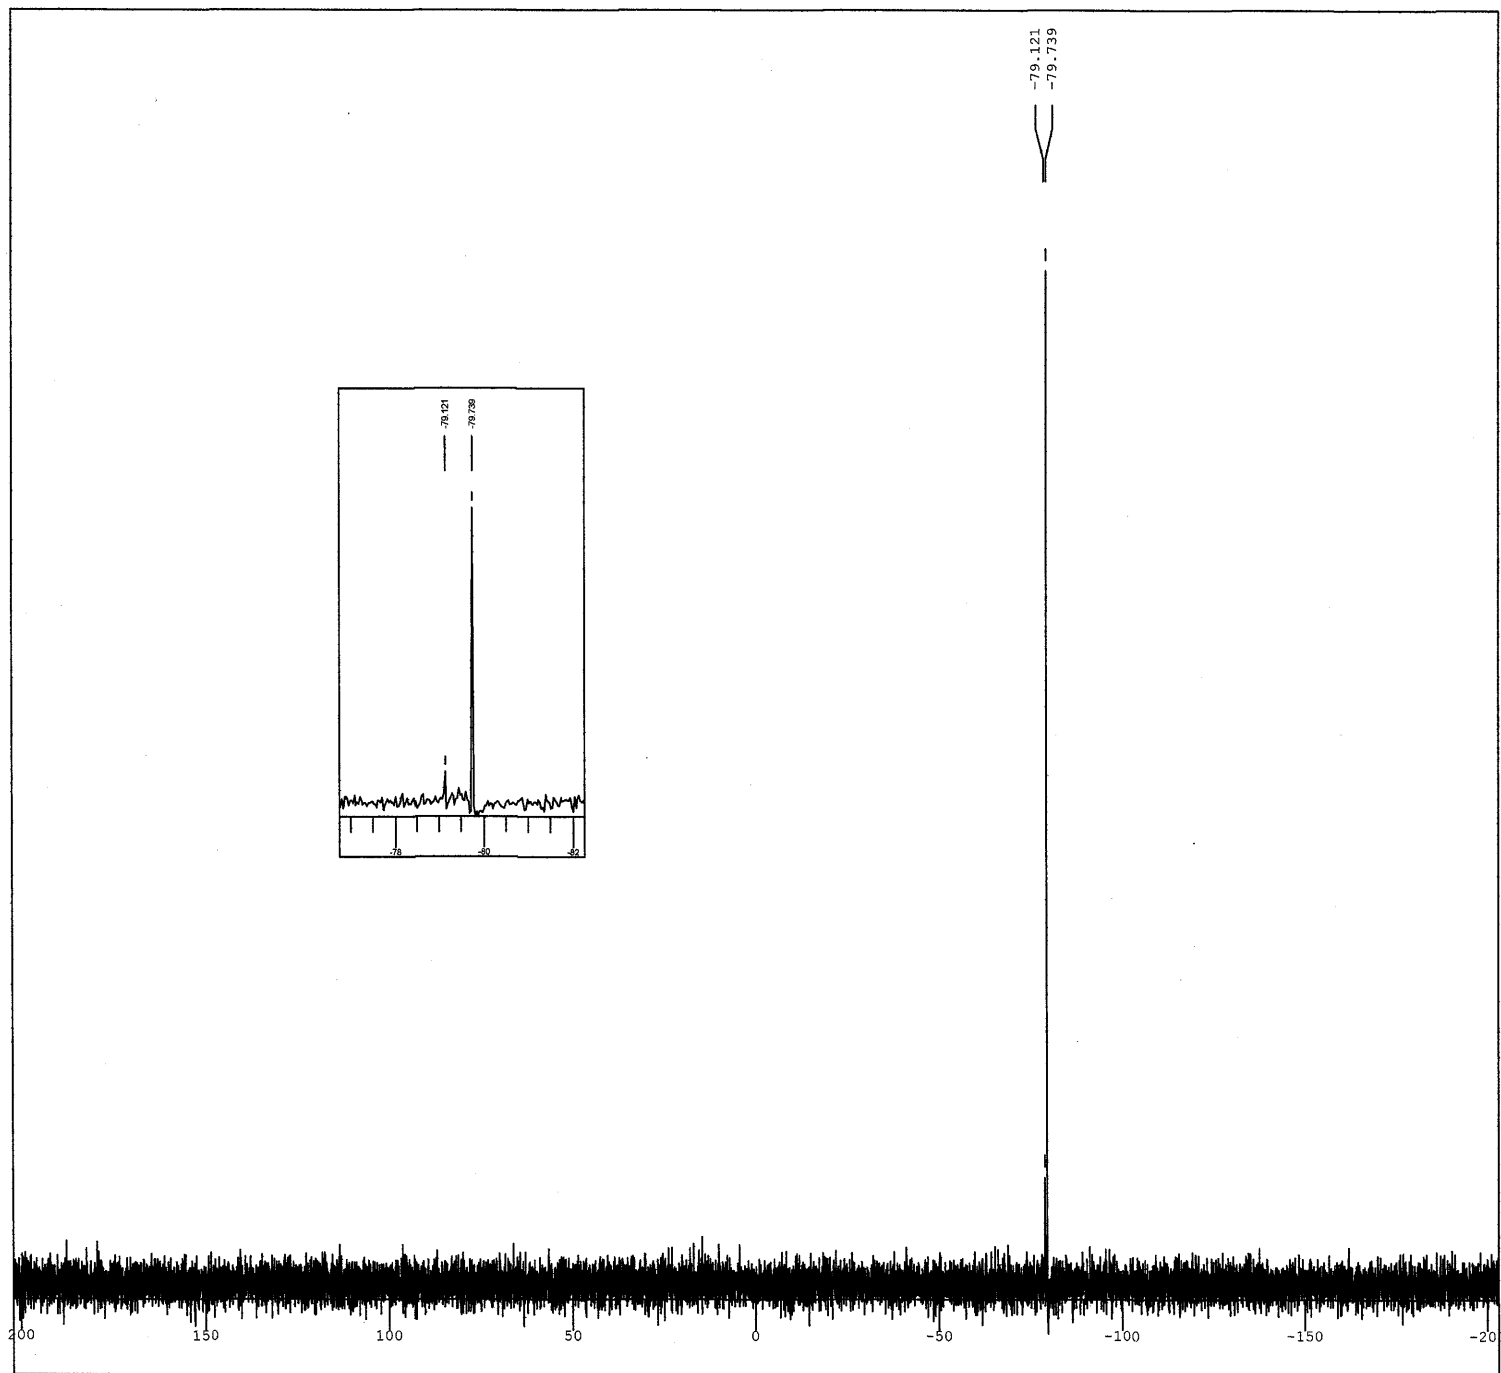

DFILE ozawa04-144\_1\_19F.jdf  
 COMNT 1,1-dMe-BuOH, [O]  
 DATIM 11-03-2014 16:28:22  
 OBNUC 19F  
 EXMOD proton.jxp  
 OBFREQ 368.64 MHz  
 OBSEF 7.63 KHz  
 OBFIN 2.85 Hz  
 POINT 16384  
 FREQU 186567.17 Hz  
 SCANS 4  
 ACQTM 0.0878 sec  
 PD 5.0000 sec  
 PW1 3.90 usec  
 IRNUC 19F  
 CTEMP 21.0 c  
 SLVNT CDCL3  
 EXREF -164.90 ppm  
 BF 0.12 Hz  
 RGAIN 50

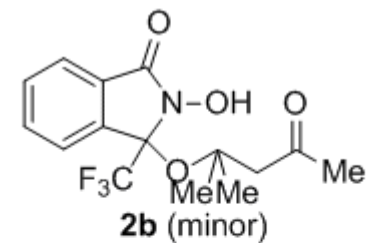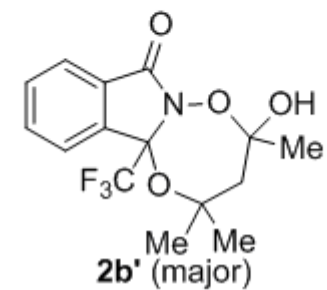

\\172.20.1.201\users\delta\Documents\JEOL\data\ozawa04-144\_1\_HMQC.jdf

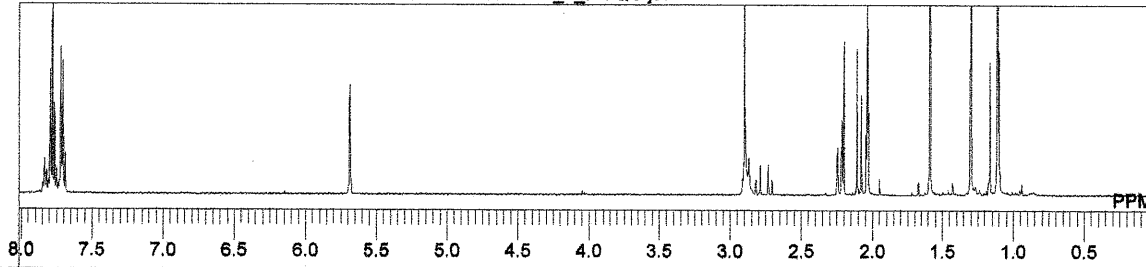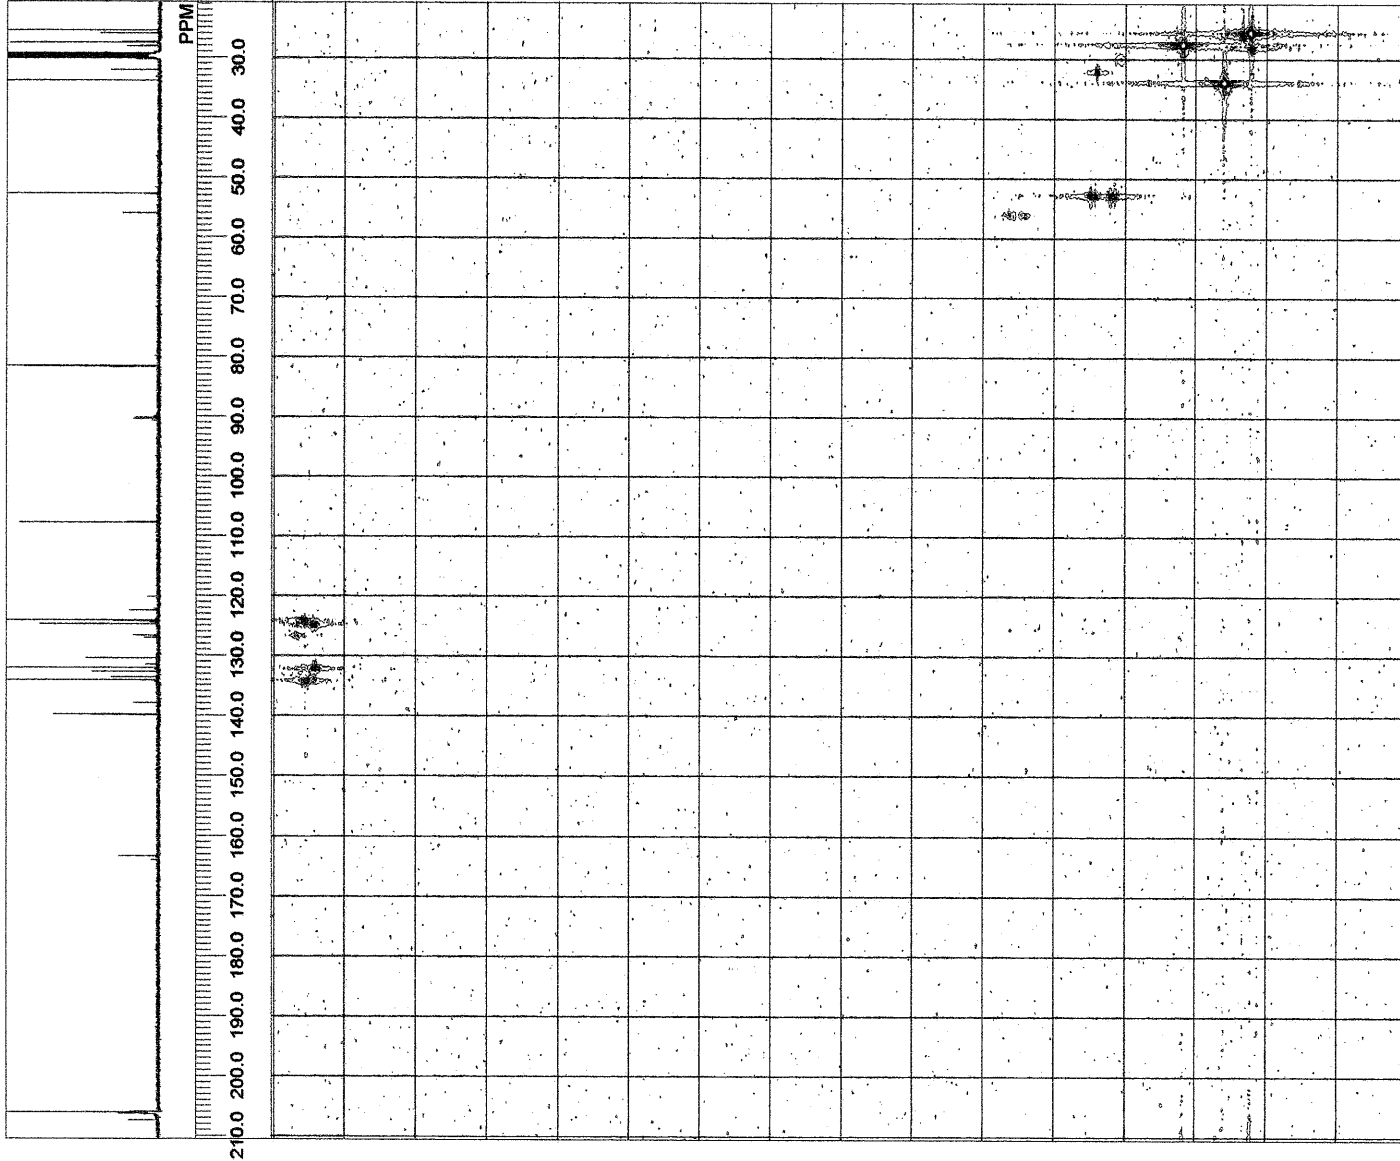

DFILE ozawa04-144\_1\_HMQC.jdf  
COMNT 1,1-dMe-BuOH, [O]  
DATIM 10-03-2014 22:58:31  
EXMOD hmqc.jxp  
OBNUC 1H  
OBFREQ 500.16 MHz  
OBSET 1.91 KHz  
OBFIN 5.85 Hz  
POINT 1024  
FREQU 5004.00 Hz  
CLPNT 512  
TODAT 512  
CLFRQ 23900.57 Hz  
SCANS 4  
ACQTM 0.2046 sec  
PD 1.5000 sec  
PW1 11.10 usec  
PW2 0.00 usec  
PW3 0.00 usec  
PI1 0.0000 msec  
PI2 0.0000 msec  
PI3 0.0000 msec  
IRNUC 13C  
CTEMP 21.5 c  
SLVNT ACETN  
EXREF 2.04 ppm  
CLEXR 29.80  
RGAIN 90

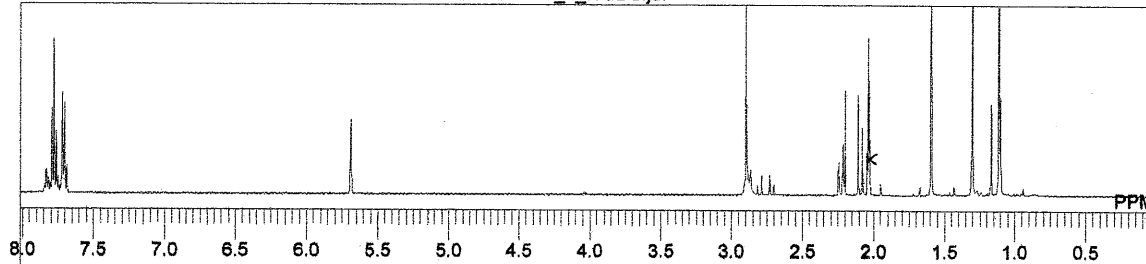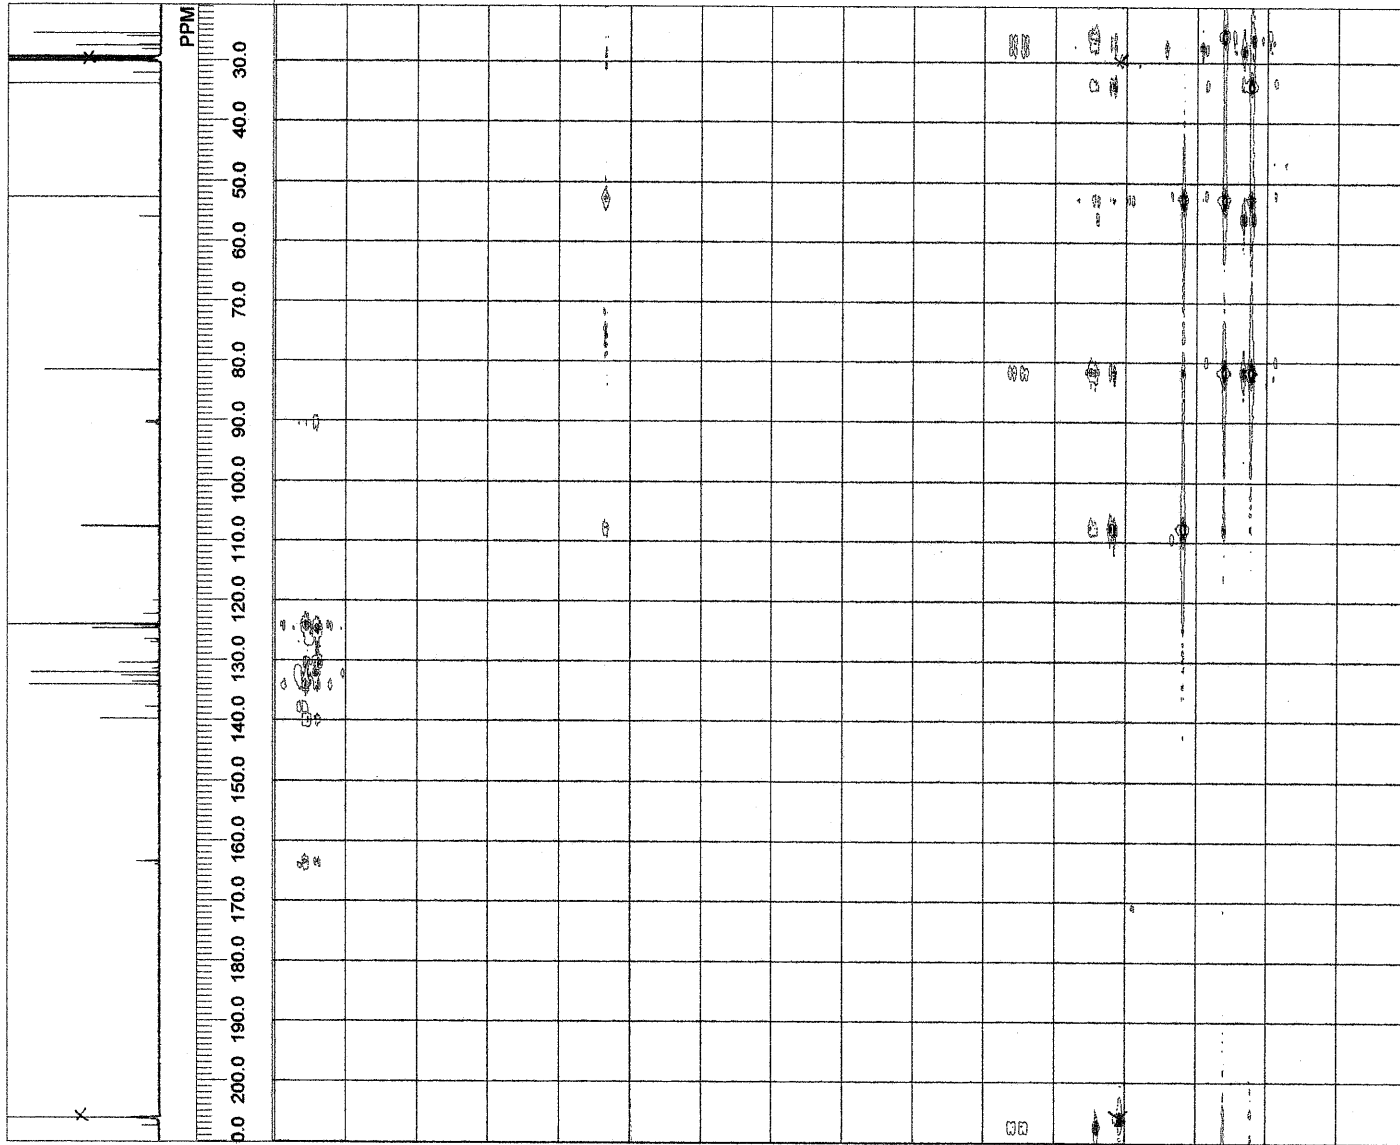

DFILE ozawa04-144\_1\_HMBC.jdf  
 COMNT 1,1-dMe-BuOH, [O]  
 DATIM 10-03-2014 23:56:07  
 EXMOD hmbc.jpg  
 OBNUC 1H  
 OBFREQ 500.16 MHz  
 OBSET 1.91 KHz  
 OBFIN 5.85 Hz  
 POINT 2047  
 FREQU 5004.00 Hz  
 CLPNT 256  
 TODAT 256  
 CLFRQ 23900.57 Hz  
 SCANS 60  
 ACQTM 0.4093 sec  
 PD 1.5000 sec  
 PW1 11.10 usec  
 PW2 0.00 usec  
 PW3 0.00 usec  
 PI1 0.0000 msec  
 PI2 0.0000 msec  
 PI3 0.0000 msec  
 IRNUC 13C  
 CTEMP 21.3 c  
 SLVNT ACETN  
 EXREF 2.04 ppm  
 CLEXR 29.80  
 RGAIN 90





2,2-dMe-BuOH, Bn

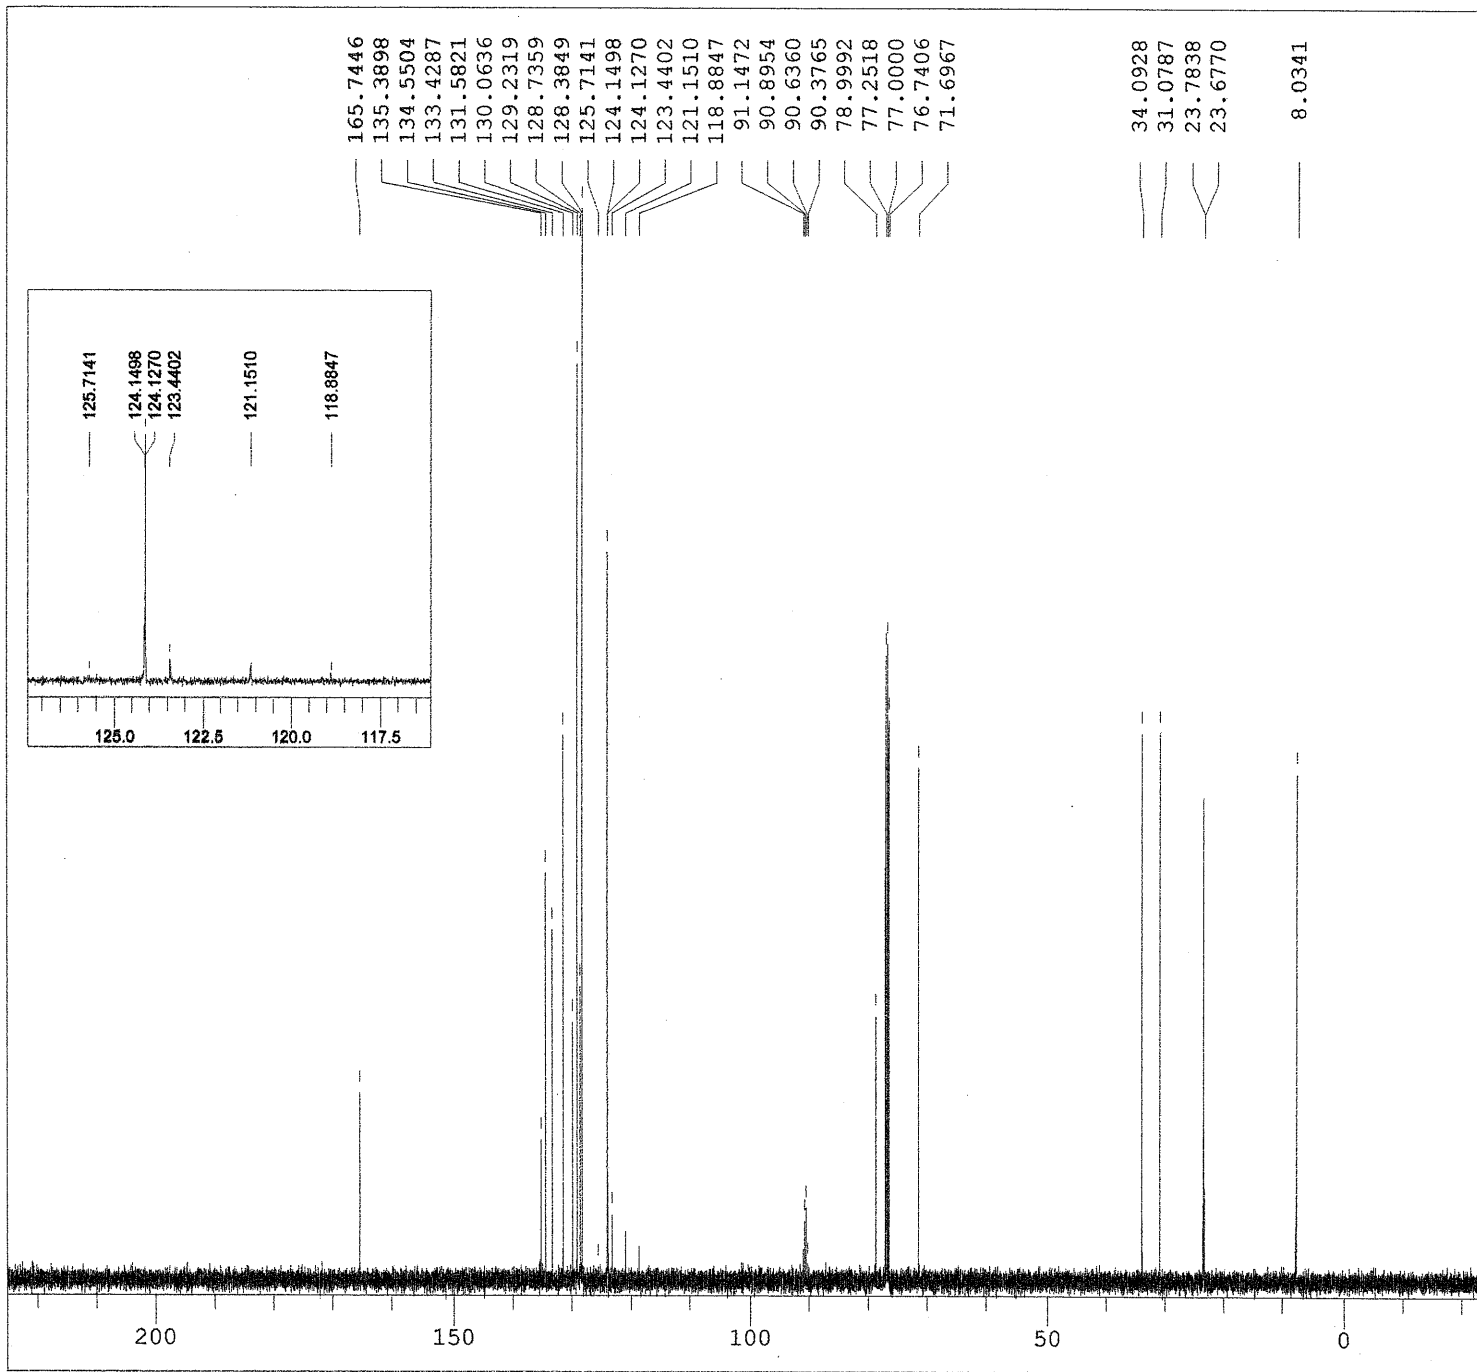

DFILE ozawa04-142\_1\_13C.jdf  
COMNT 2,2-dMe-BuOH, Bn  
DATIM 2014-03-06 19:22:14  
OBNUC 13C  
EXMOD carbon.jxp  
OBFRQ 125.77 MHz  
OBSET 7.87 KHz  
OBFIN 4.21 Hz  
POINT 32768  
FREQU 31446.54 Hz  
SCANS 78  
ACQTM 1.0420 sec  
PD 3.0000 sec  
PW1 3.40 usec  
IRNUC 1H  
CTEMP 21.7 c  
SLVNT CDCL3  
EXREF 77.00 ppm  
BF 0.12 Hz  
RGAIN 72

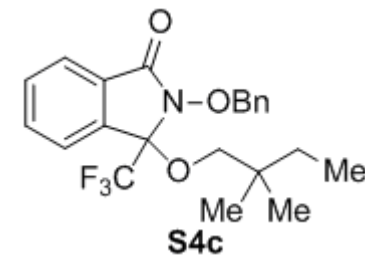

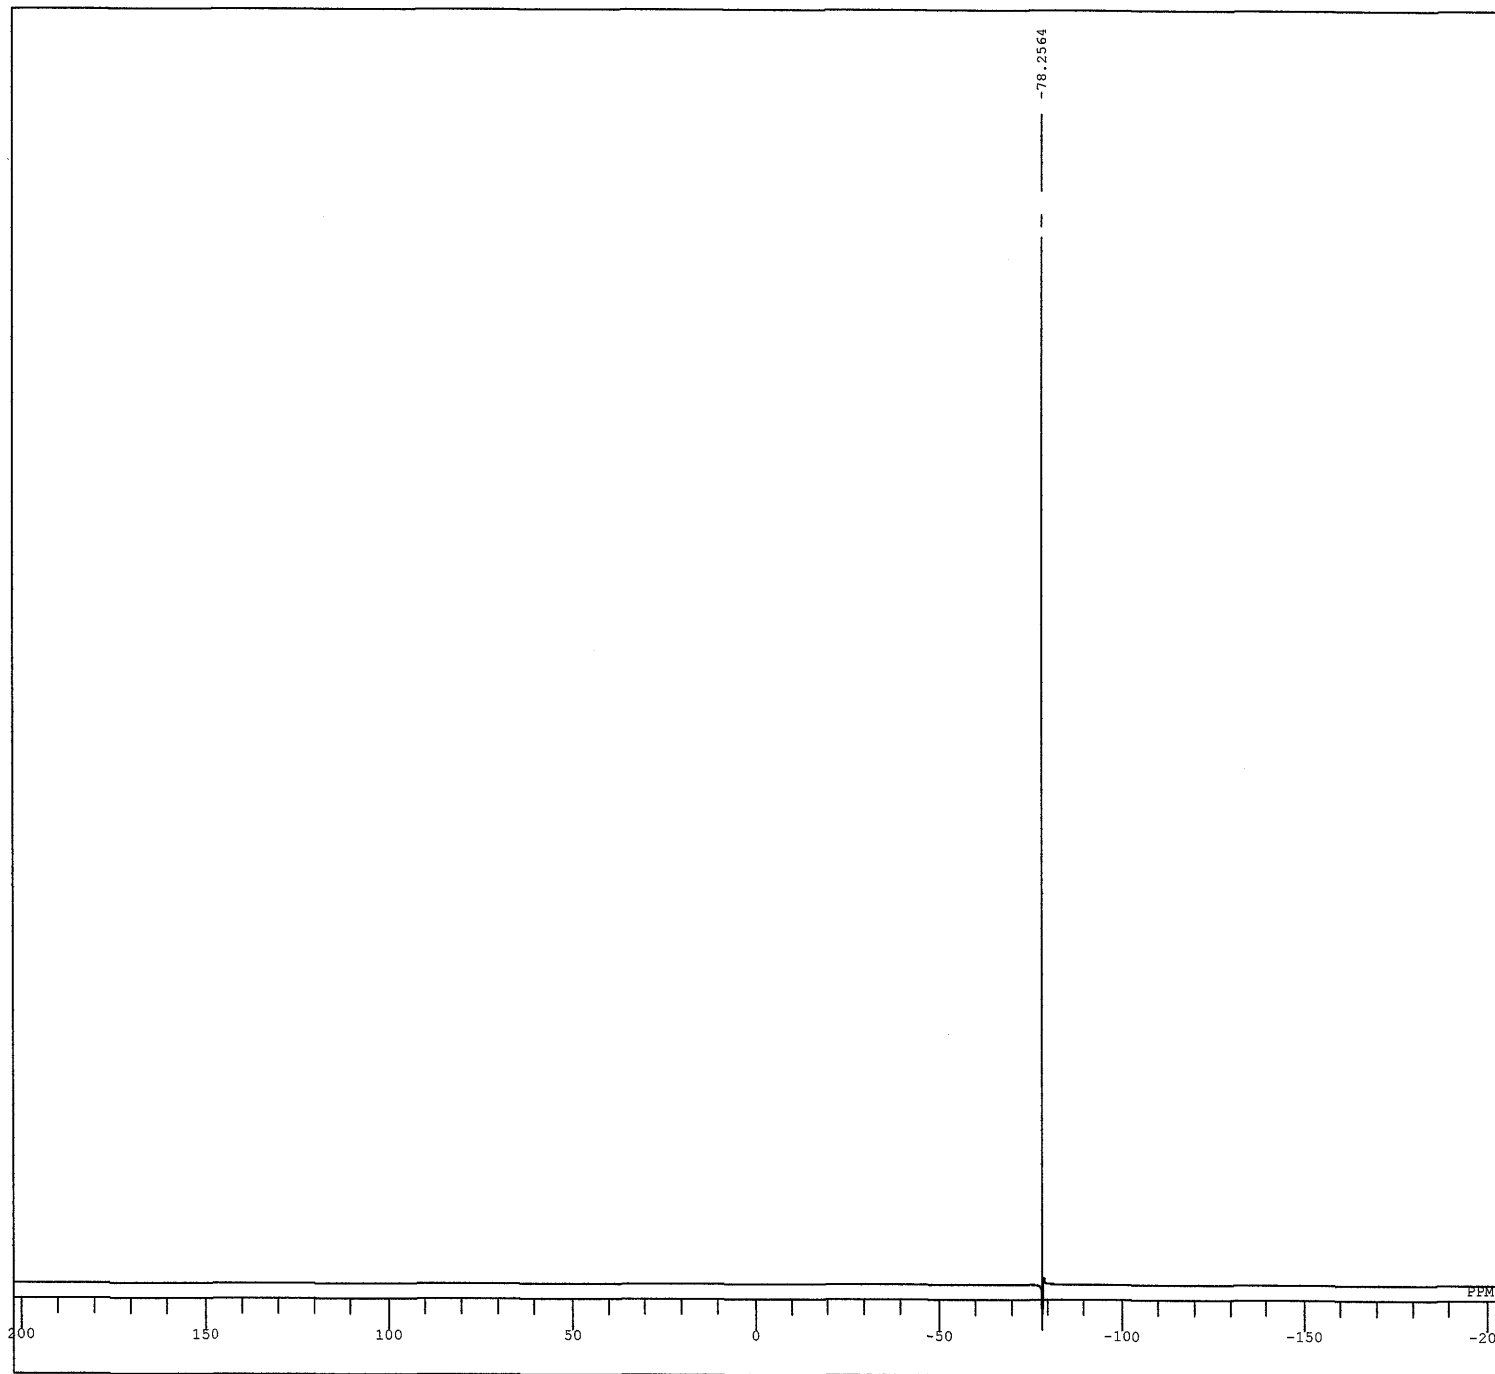

DFILE ozawa04-142\_1\_19F.jdf  
COMNT 2,2-dMe-BuOH, Bn  
DATIM 06-03-2014 20:39:07  
OBNUC 19F  
EXMOD proton.jxp  
OBFREQ 368.64 MHz  
OBSETE 7.63 KHz  
OBFIN 2.85 Hz  
POINT 16384  
FREQU 186567.17 Hz  
SCANS 4  
ACQTM 0.0878 sec  
PD 5.0000 sec  
FW1 3.90 usec  
IRNUC 19F  
CTEMP 21.4 c  
SLVNT CDCL3  
EXREF -164.90 ppm  
BF 0.12 Hz  
RGAIN 46

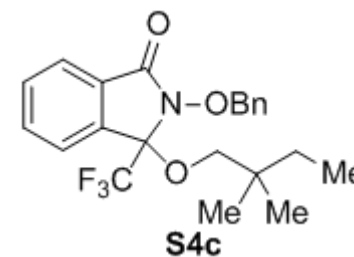

OH

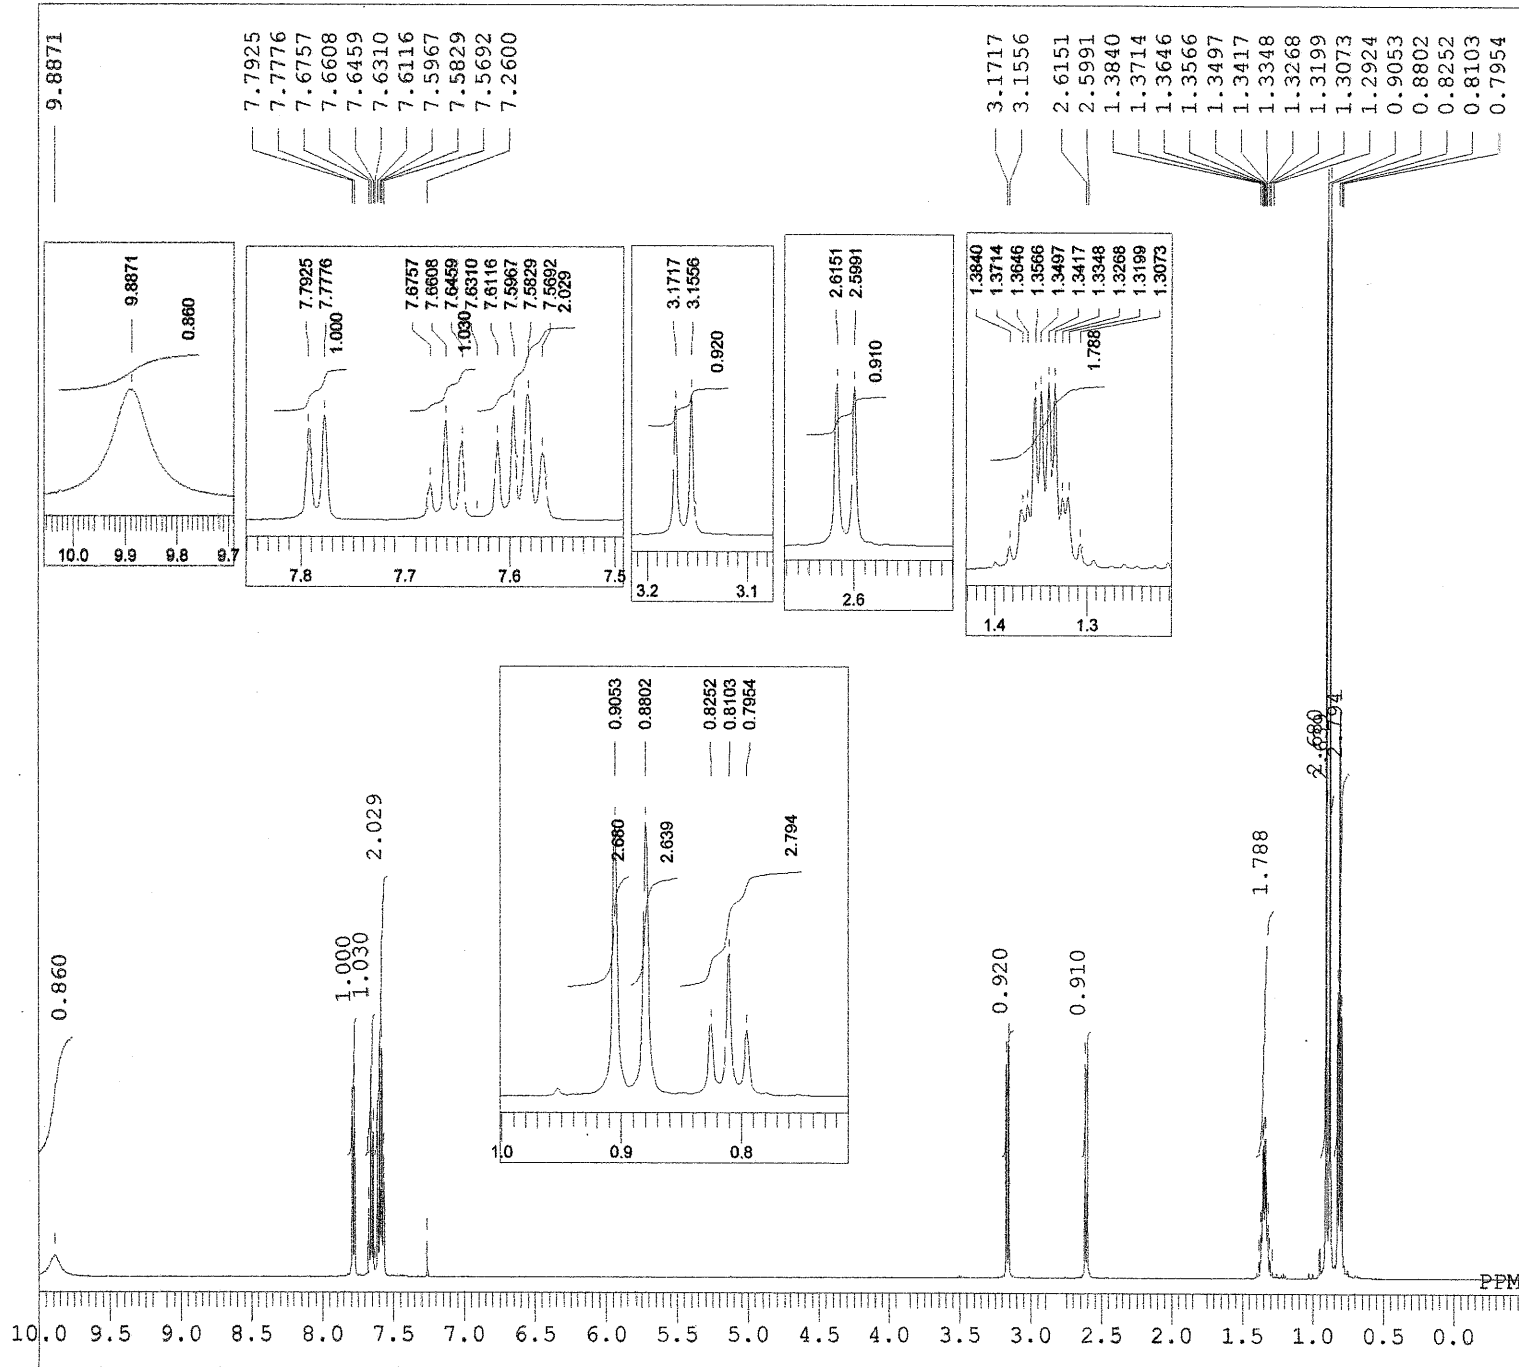

DFILE Ni\_2,2-dMe-BuOH\_1H.jdf  
 COMNT OH  
 DATIM 2014-03-03 20:17:29  
 OBNUC 1H  
 EXMOD proton.jxp  
 OBFREQ 500.16 MHz  
 OBSET 2.41 KHz  
 OBFIN 6.01 Hz  
 POINT 16384  
 FREQU 9384.38 Hz  
 SCANS 4  
 ACQTM 1.7459 sec  
 PD 5.0000 sec  
 PW1 5.55 usec  
 IRNUC 1H  
 CTEMP 21.1 c  
 SLVNT CDCL3  
 EXREF 7.26 ppm  
 BF 0.12 Hz  
 RGAIN 28

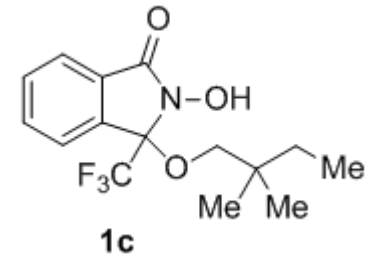

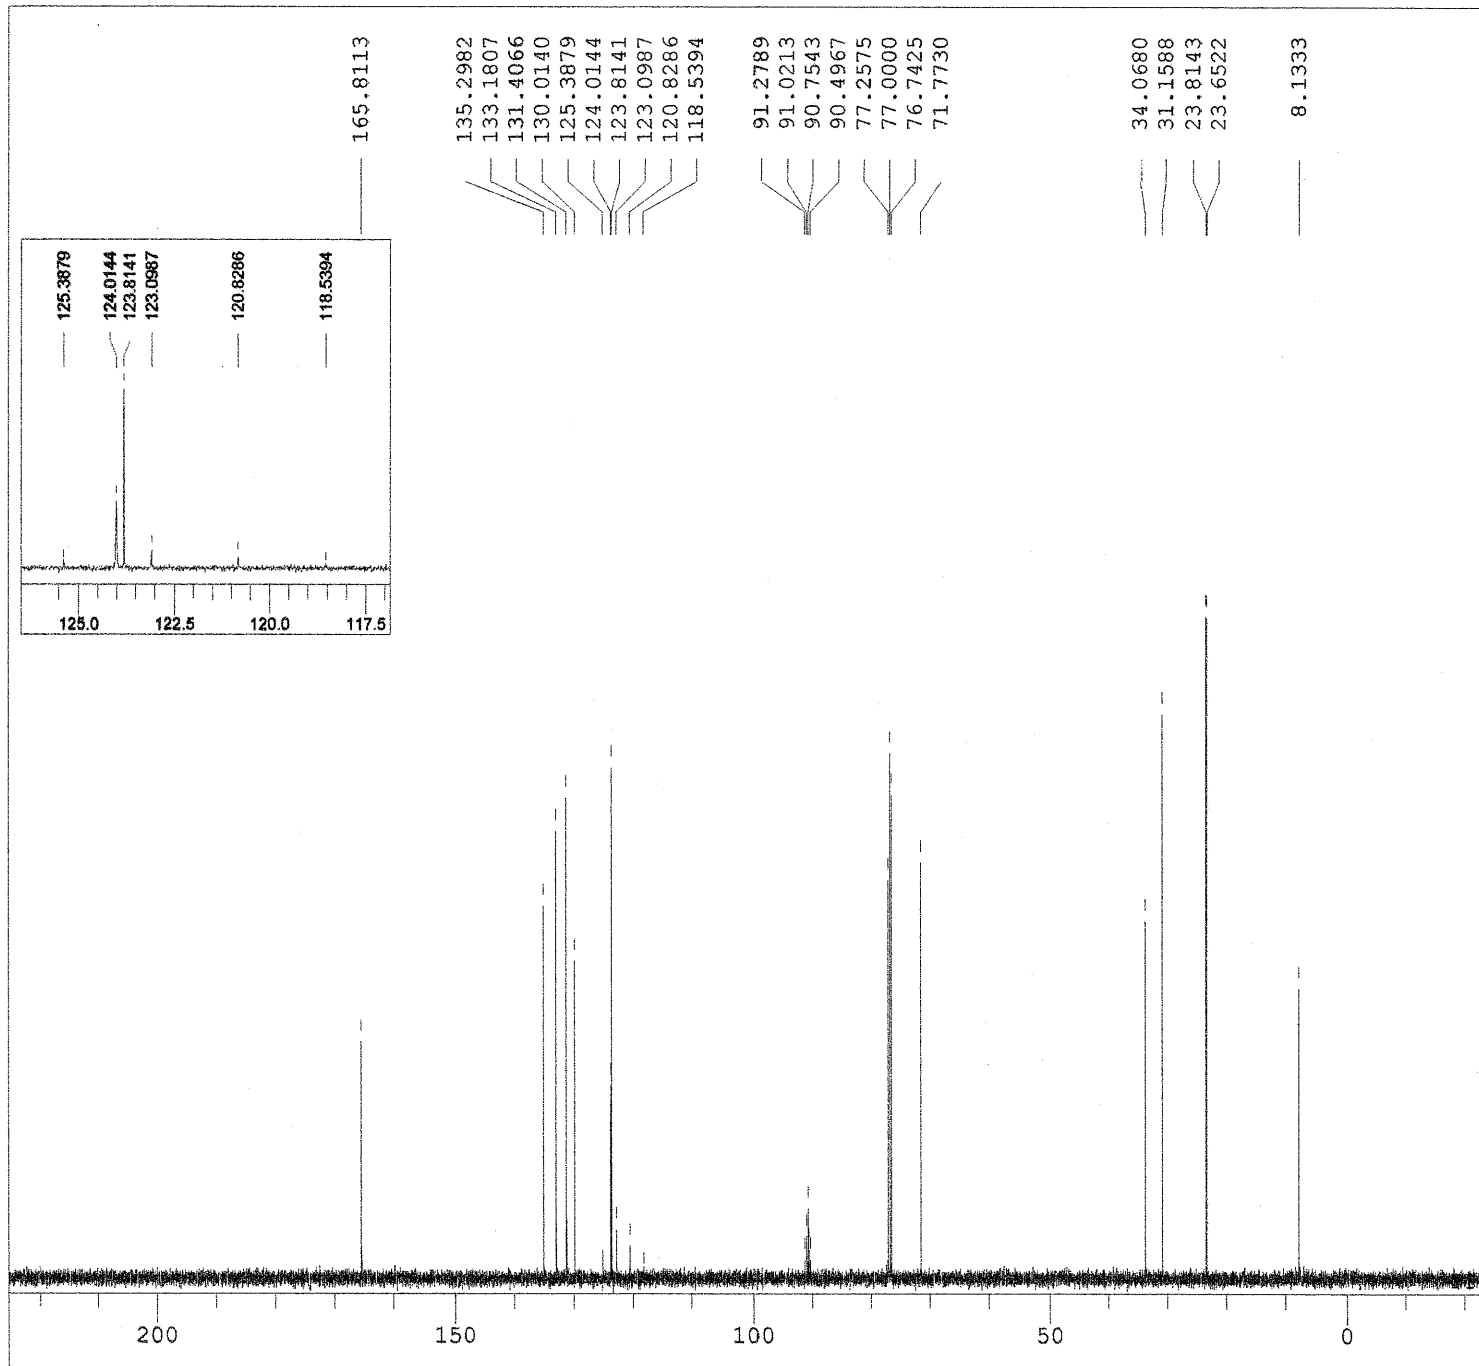

DFILE Ni\_2,2-dMe-BuOH\_13C.jdf  
 COMNT OH  
 DATIM 2014-03-03 20:18:32  
 OBNUC 13C  
 EXMOD carbon.jxp  
 OBFRO 125.77 MHz  
 OBSET 7.87 KHz  
 OBFIN 4.21 Hz  
 POINT 32767  
 FREQU 39308.18 Hz  
 SCANS 80  
 ACQTM 0.8336 sec  
 PD 3.0000 sec  
 PW1 3.40 usec  
 IRNUC 1H  
 CTEMP 21.3 c  
 SLVNT CDCL3  
 EXREF 77.00 ppm  
 BF 0.12 Hz  
 RGAIN 60

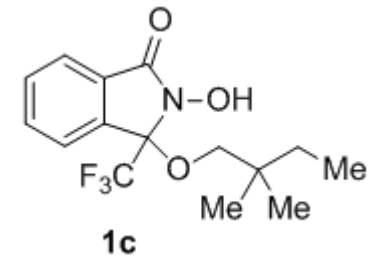

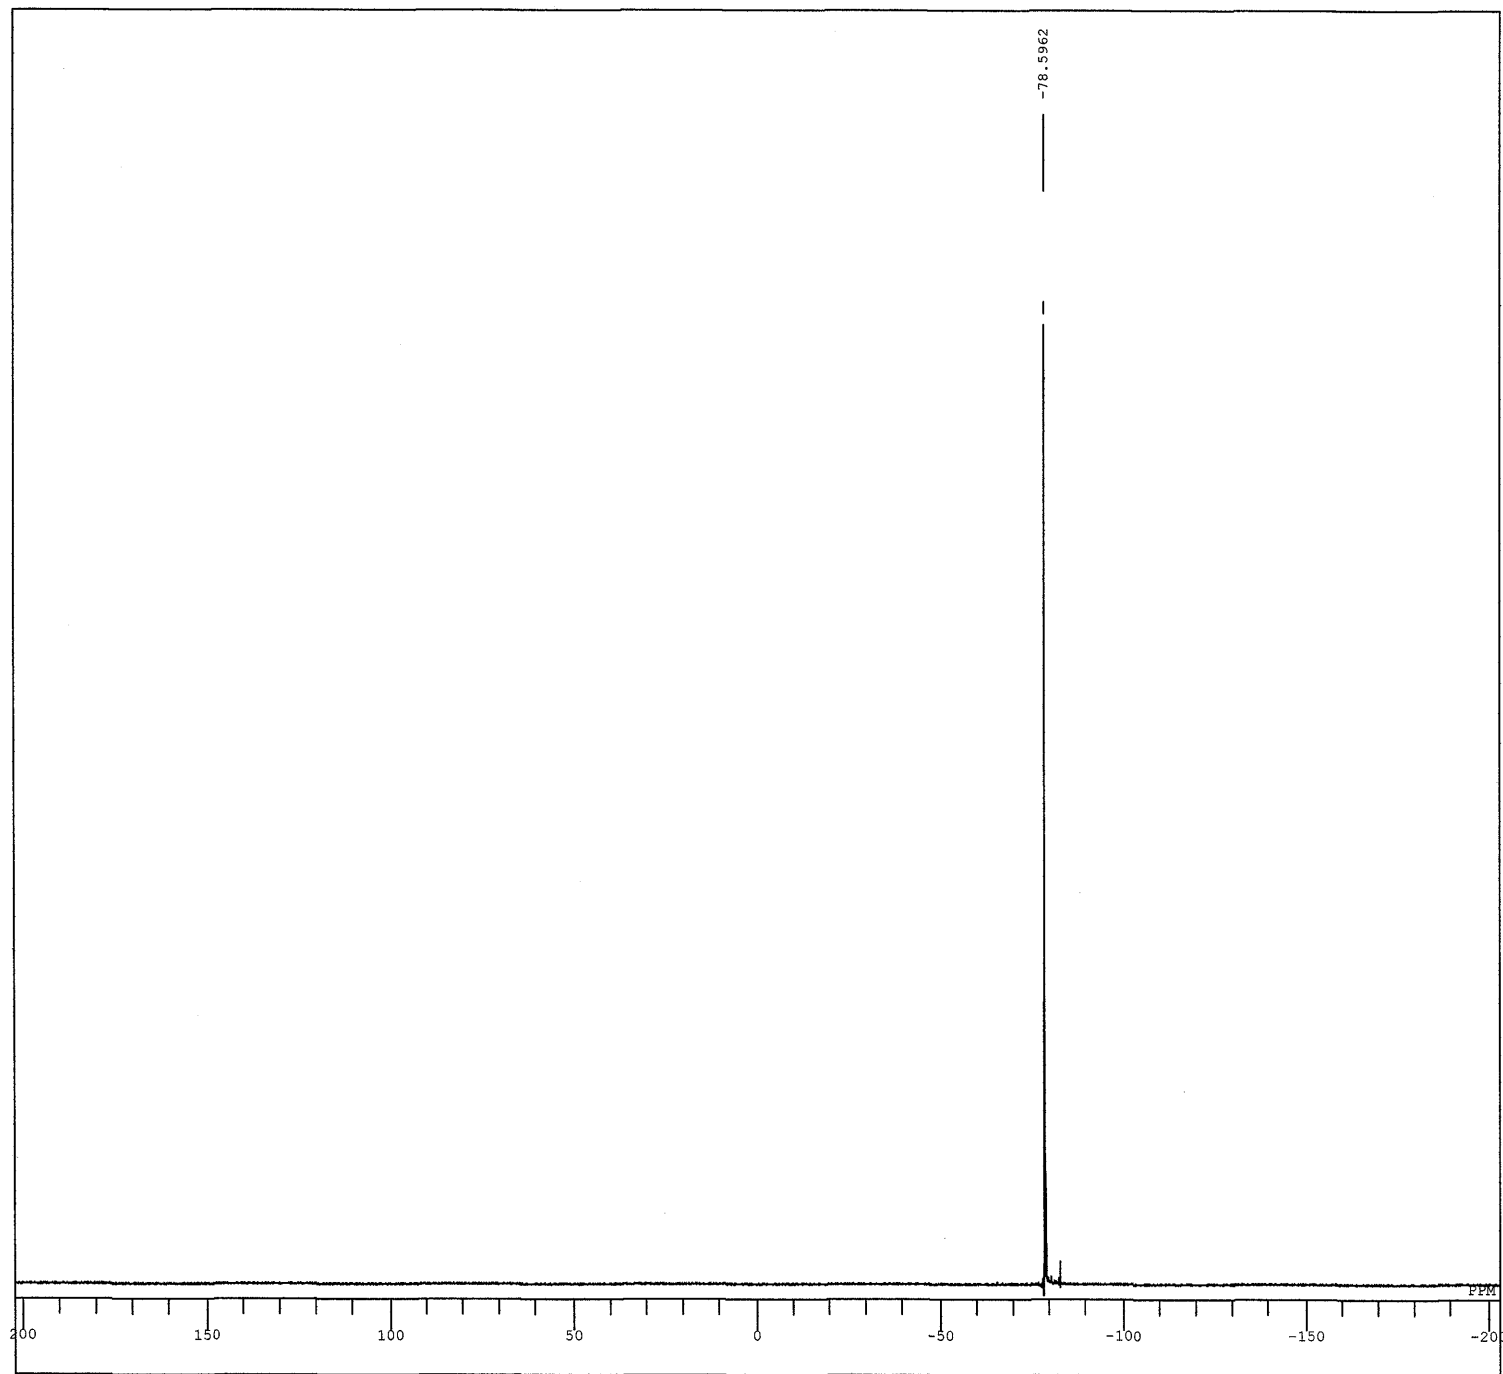

DFILE Ni\_2,2-dMe-BuOH\_19F.jdf  
COMNT OH  
DATIM 03-03-2014 20:57:45  
OBNUC 19F  
EXMOD proton.jxp  
OBFRQ 368.64 MHz  
OBSET 7.63 KHz  
OBFIN 2.85 Hz  
POINT 16384  
FREQU 186567.17 Hz  
SCANS 4  
ACQTM 0.0878 sec  
PD 5.0000 sec  
PW1 3.90 usec  
IRNUC 19F  
CTEMP 21.0 c  
SLVNT CDCL3  
EXREF -164.90 ppm  
BF 0.12 Hz  
RGAIN 44

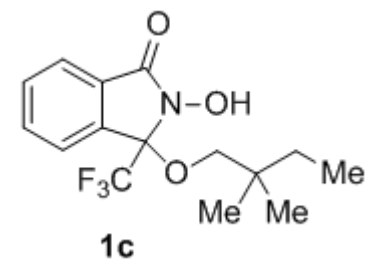

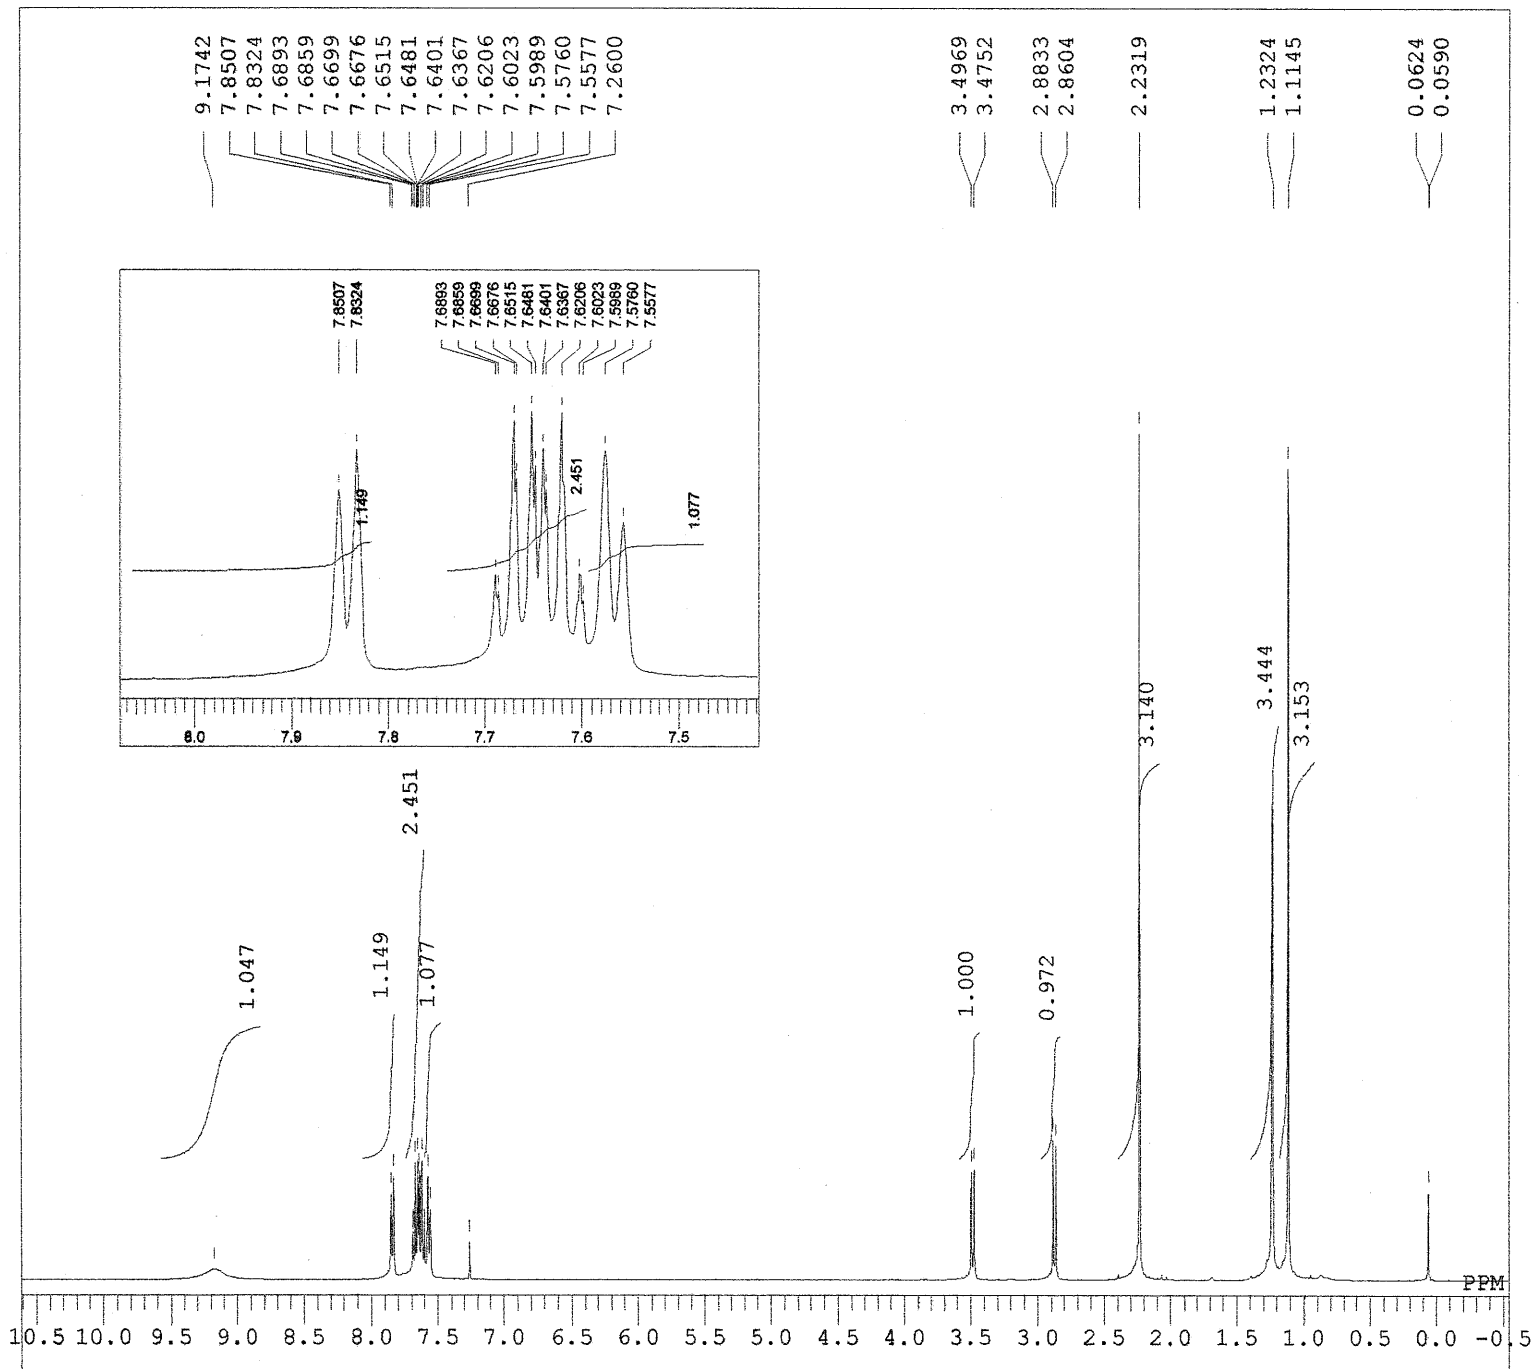

DFILE ni140206-C-K-peak1-H1-1-1.als  
 COMNT  
 DATIM 06-02-2014 16:27:48  
 OBNUC 1H  
 EXMOD proton.jxp  
 OBFRQ 391.78 MHz  
 OBSET 8.51 KHz  
 OBFIN 3.34 Hz  
 POINT 13107  
 FREQU 5878.90 Hz  
 SCANS 18  
 ACQTM 2.2295 sec  
 PD 5.0000 sec  
 PW1 5.25 usec  
 IRNUC 1H  
 CTEMP 21.2 c  
 SLVNT CDCL3  
 EXREF 7.26 ppm  
 BF 0.12 Hz  
 RGAIN 30

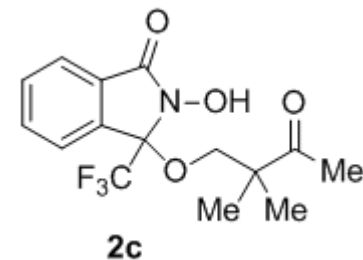

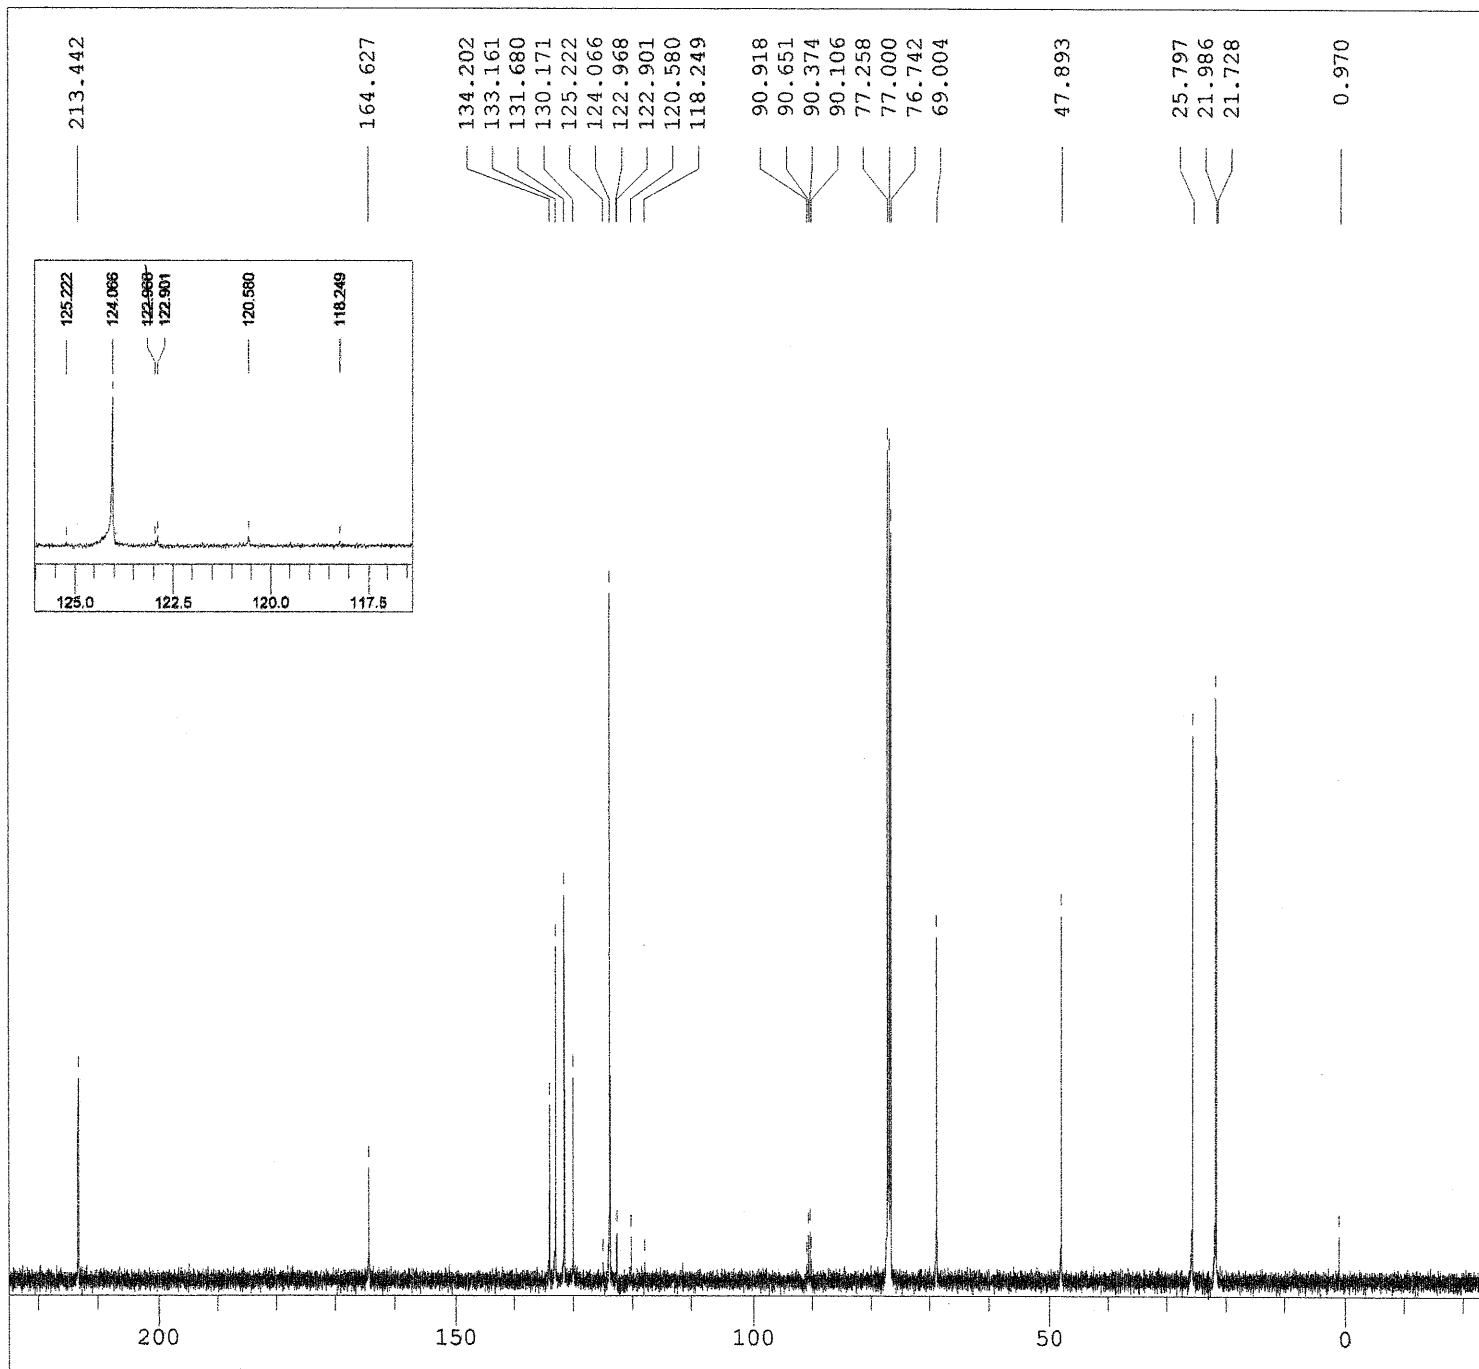

DFILE ni140206-C-K-C13.als  
 COMNT  
 DATIM 2014-02-03 01:46:38  
 OBNUC 13C  
 EXMOD single\_pulse\_dec  
 OBFRQ 123.26 MHz  
 OBSET 2.31 KHz  
 OBFIN 6.71 Hz  
 POINT 26214  
 FREQU 30863.73 Hz  
 SCANS 2236  
 ACQTM 0.8493 sec  
 PD 2.0000 sec  
 PW1 3.40 usec  
 IRNUC 1H  
 CTEMP 22.7 c  
 SLVNT CDCL3  
 EXREF 77.00 ppm  
 BF 0.05 Hz  
 RGAIN 50

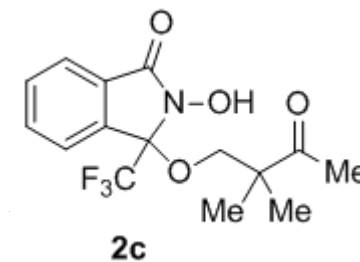



DFILE ni140206-C-K-peak1-F19-1-1.jdf  
COMNT  
DATIM 06-02-2014 16:32:06  
OBNUC 19F  
EXMOD proton.jxp  
OBFRQ 368.64 MHz  
OBSET 7.63 KHz  
OBFIN 2.85 Hz  
POINT 16384  
FREQU 186567.17 Hz  
SCANS 4  
ACQIM 0.0878 sec  
PD 5.0000 sec  
PW1 3.90 usec  
IRNUC 19F  
CTEMP 21.1 c  
SLVNT CDCL3  
EXREF -164.90 ppm  
BF 0.12 Hz  
RGAIN 46

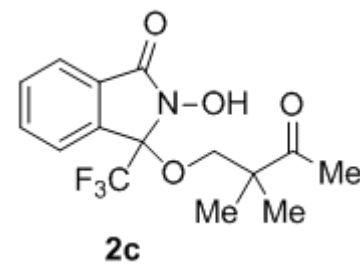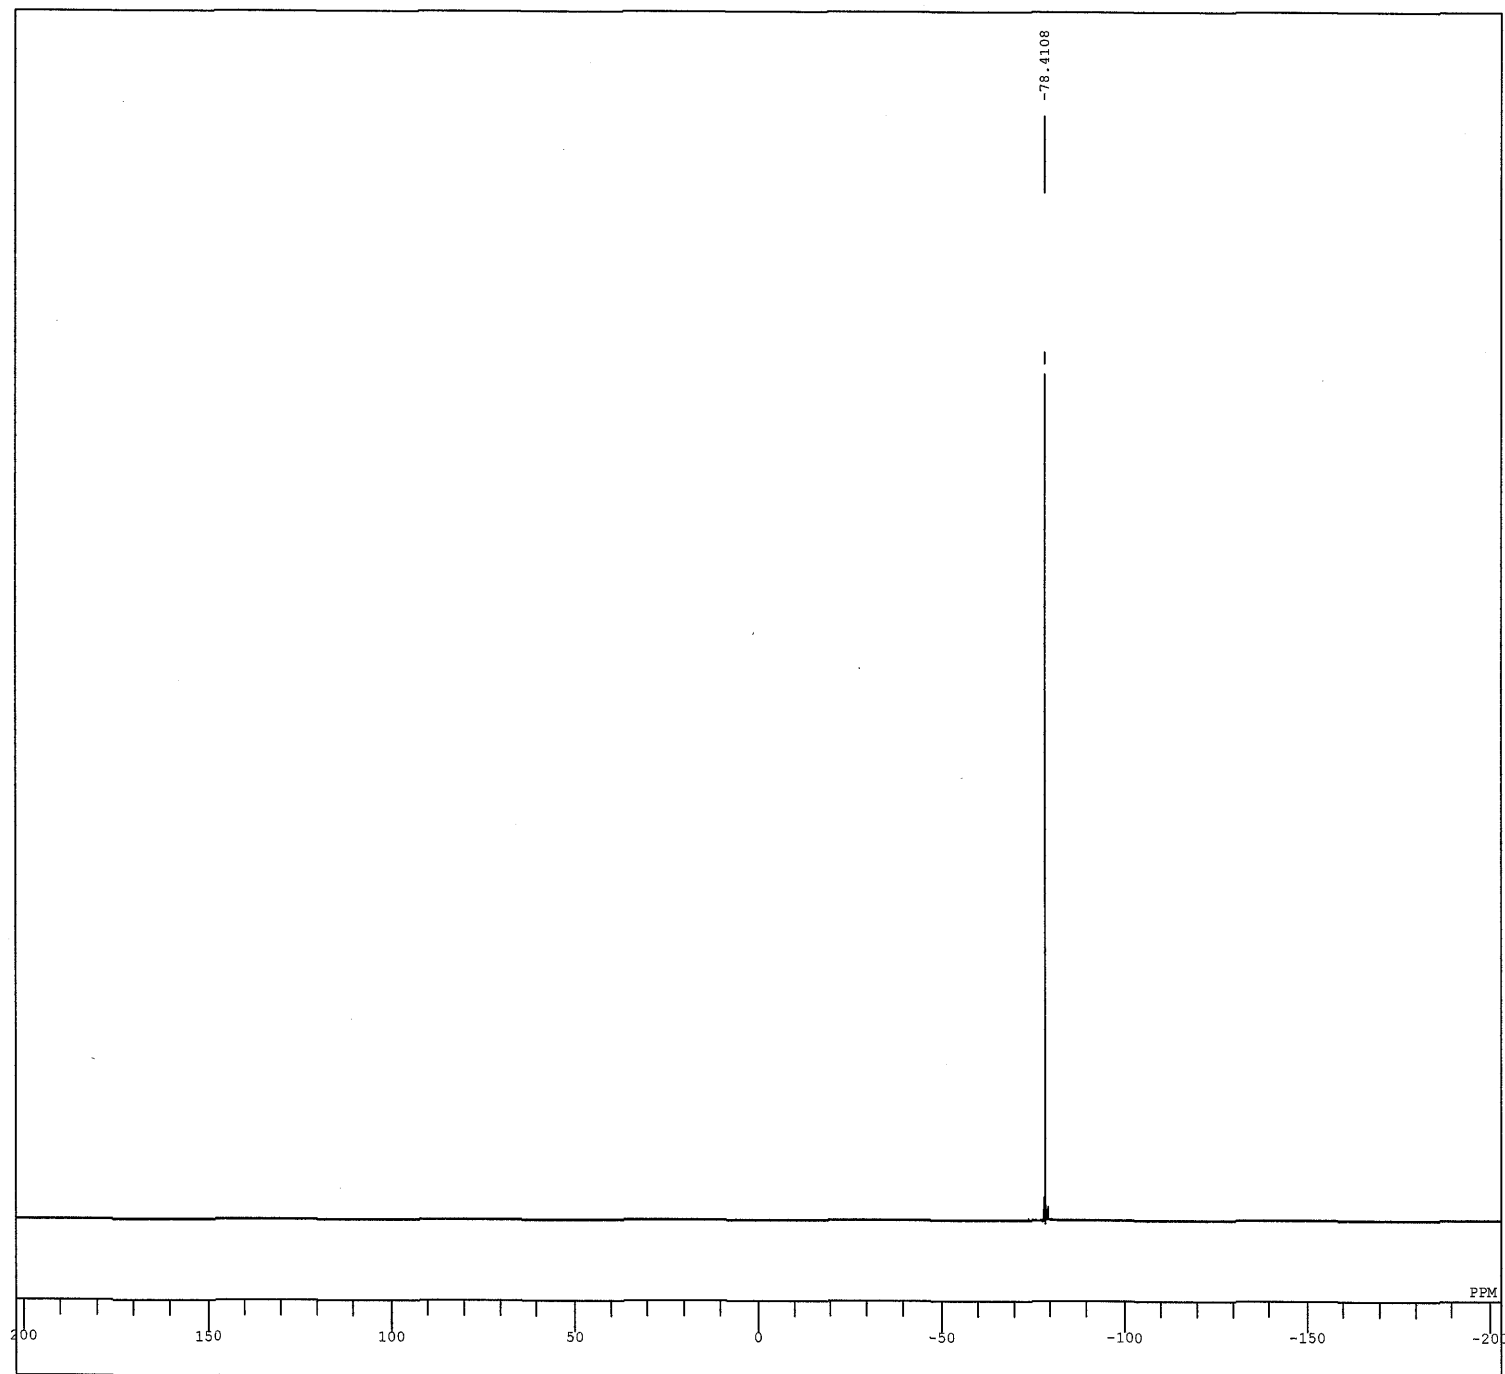

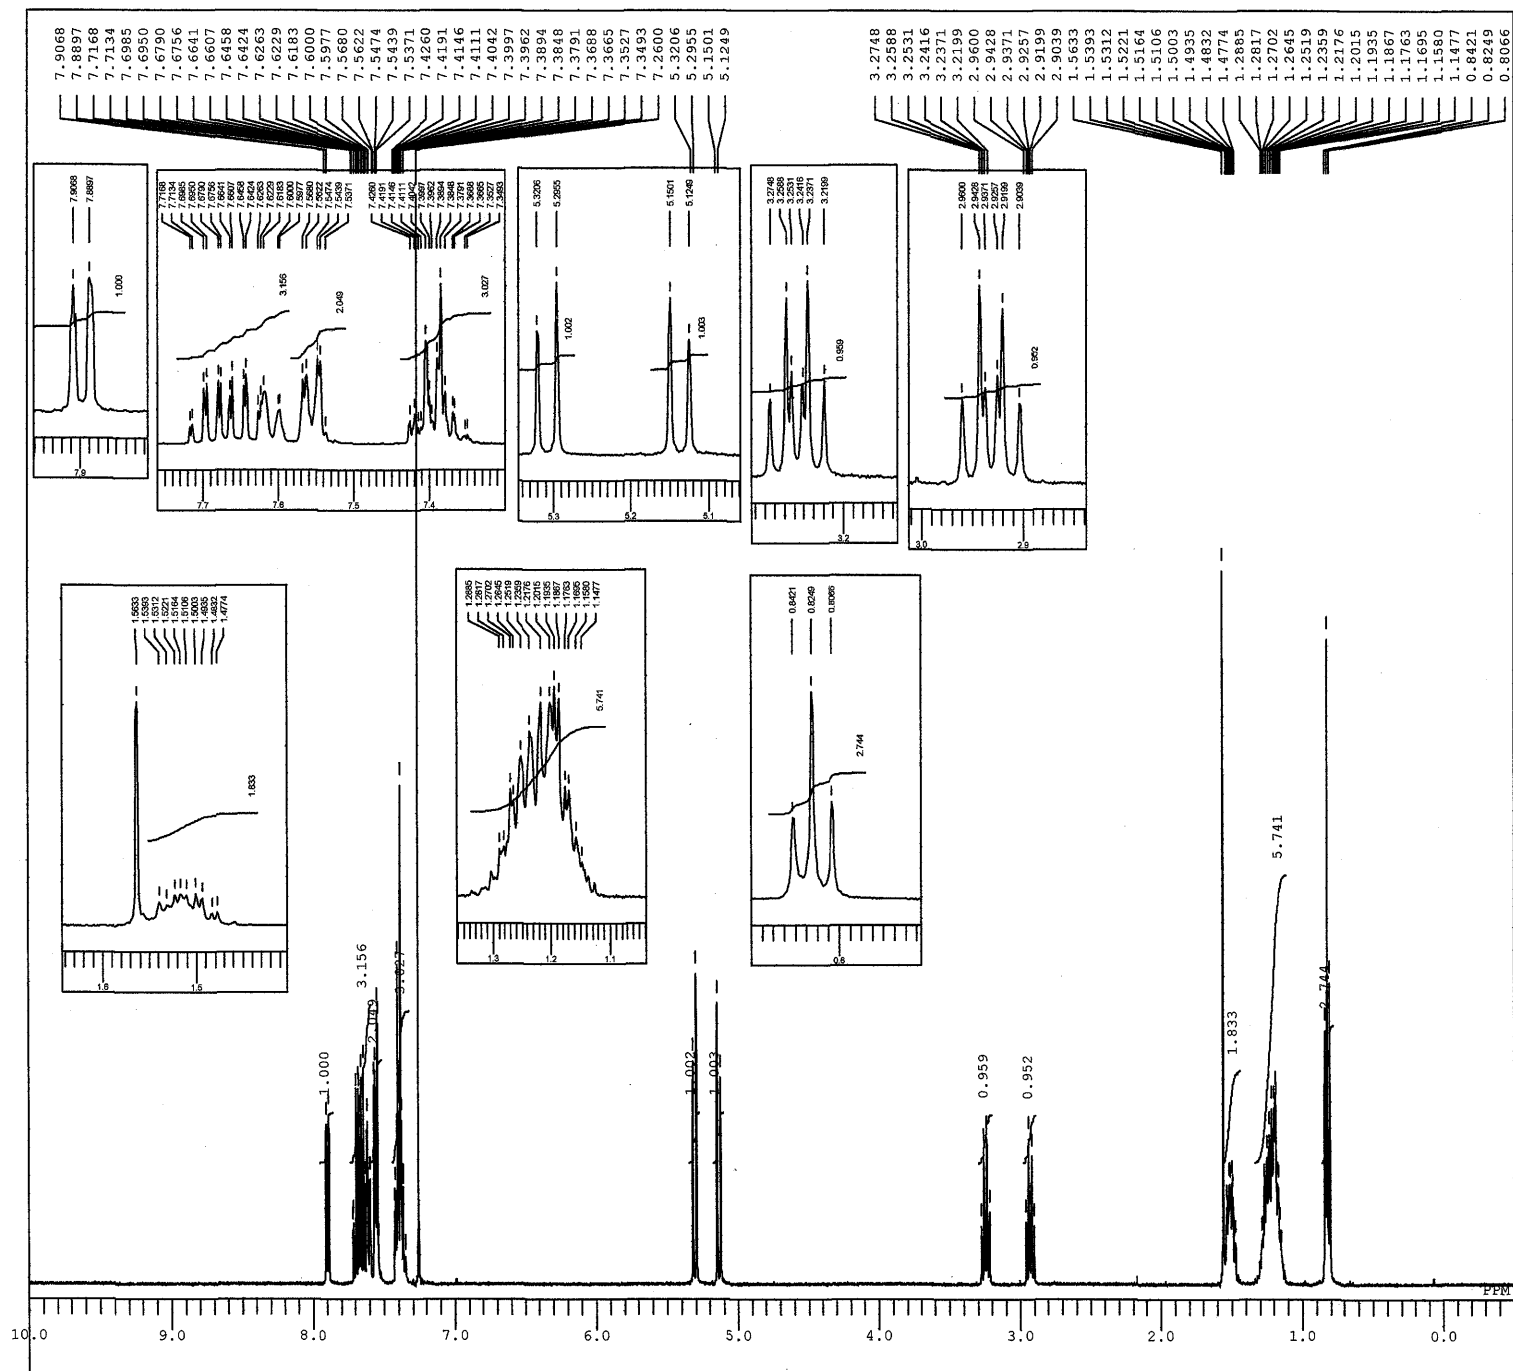

DFILE ozawa04-007\_1H.a1s  
 COMNT hexOH, Bn  
 DATIM 15-03-2014 15:16:19  
 OBNUC 1H  
 EXMOD proton.jxp  
 OBFREQ 391.78 MHz  
 OBSET 8.51 KHz  
 OBFIN 3.34 Hz  
 POINT 13107  
 FREQU 5878.90 Hz  
 SCANS 4  
 ACQTM 2.2295 sec  
 PD 5.0000 sec  
 PW1 5.25 usec  
 IRNUC 1H  
 CTEMP 21.0 c  
 SLVNT CDCl3  
 EXREF 7.26 ppm  
 BF 0.12 Hz  
 RGAIN 46

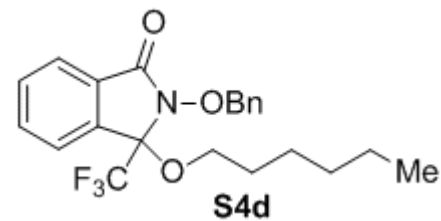

hexOH, Bn

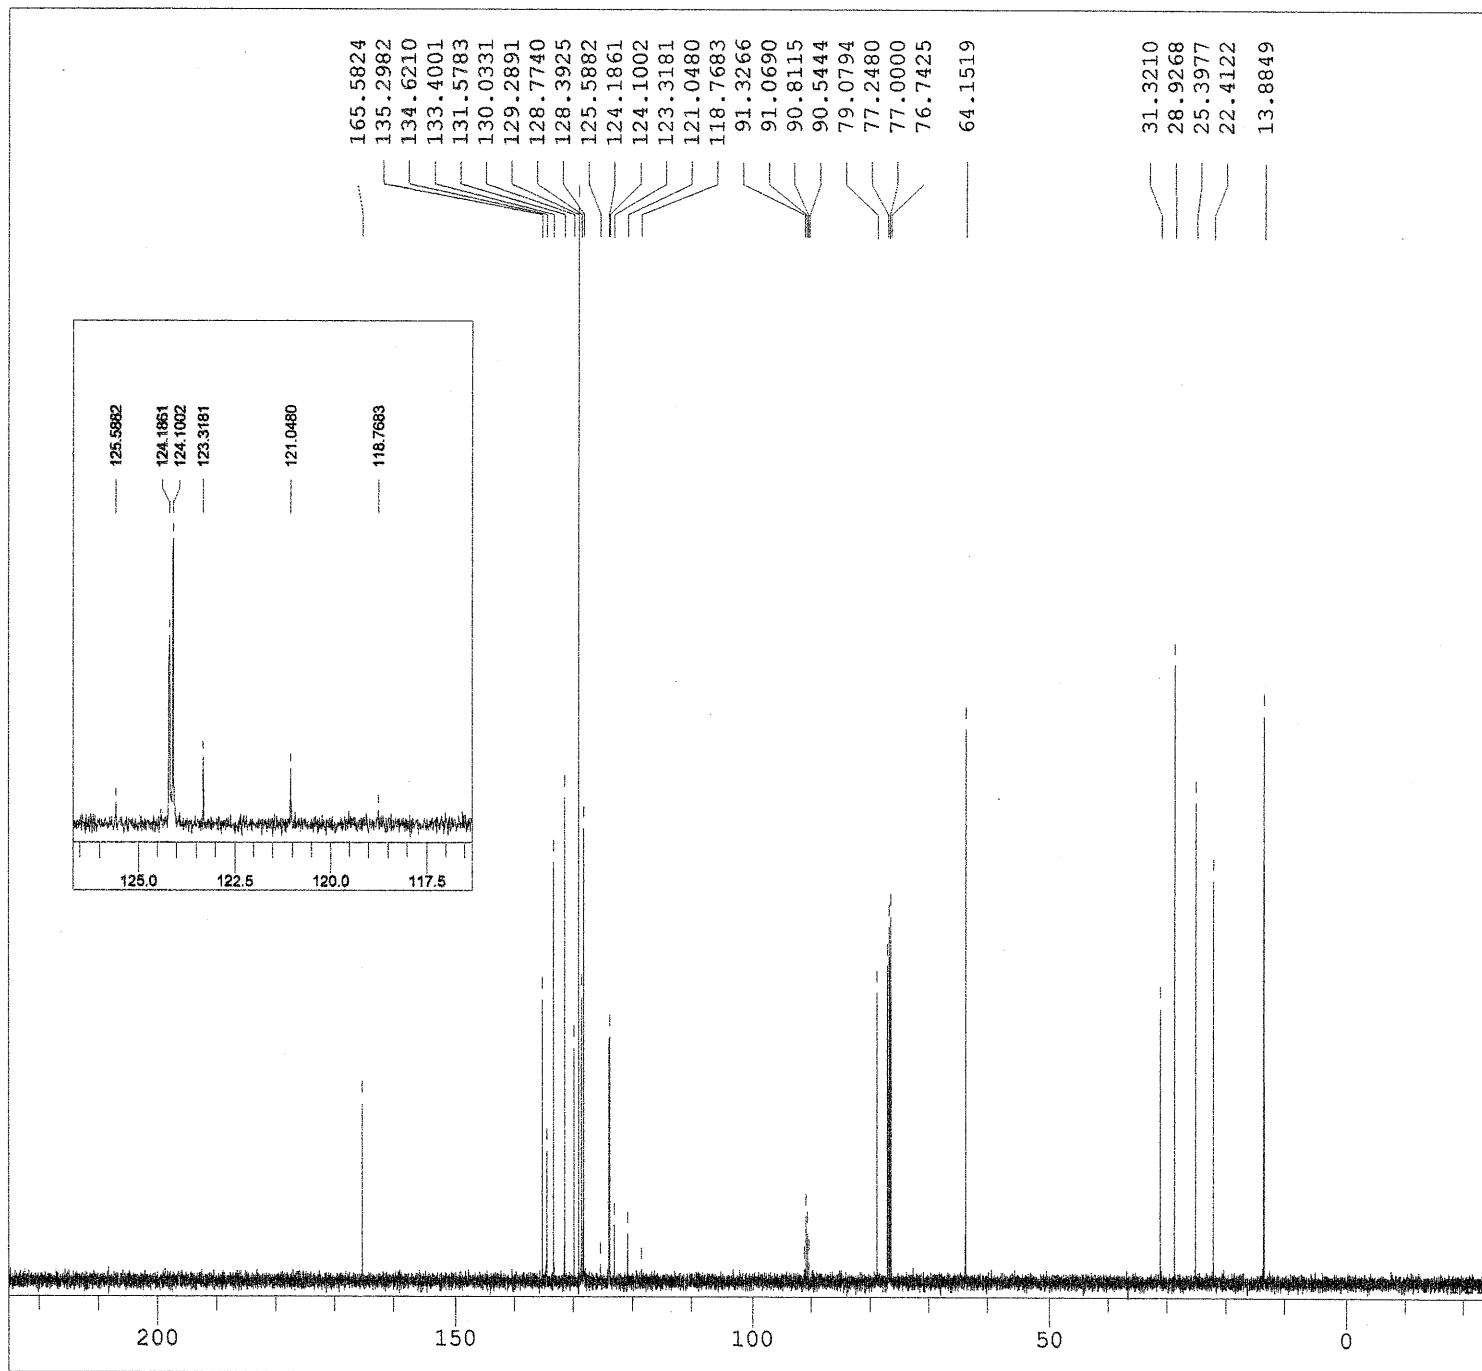

DFILE ozawa04-151\_13C.jdf  
COMNT hexOH, Bn  
DATIM 2014-03-22 19:03:22  
OBNUC 13C  
EXMOD carbon.jxp  
OBFRQ 125.77 MHz  
OBSET 7.87 KHz  
OBFIN 4.21 Hz  
POINT 32767  
FREQU 39308.18 Hz  
SCANS 68  
ACQTM 0.8336 sec  
PD 3.0000 sec  
PW1 3.40 usec  
IRNUC 1H  
CTEMP 21.6 c  
SLVNT CDCL3  
EXREF 77.00 ppm  
BF 0.12 Hz  
RGAIN 60

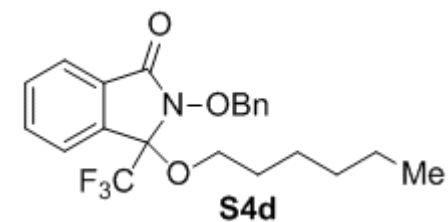

hexOH, Bn

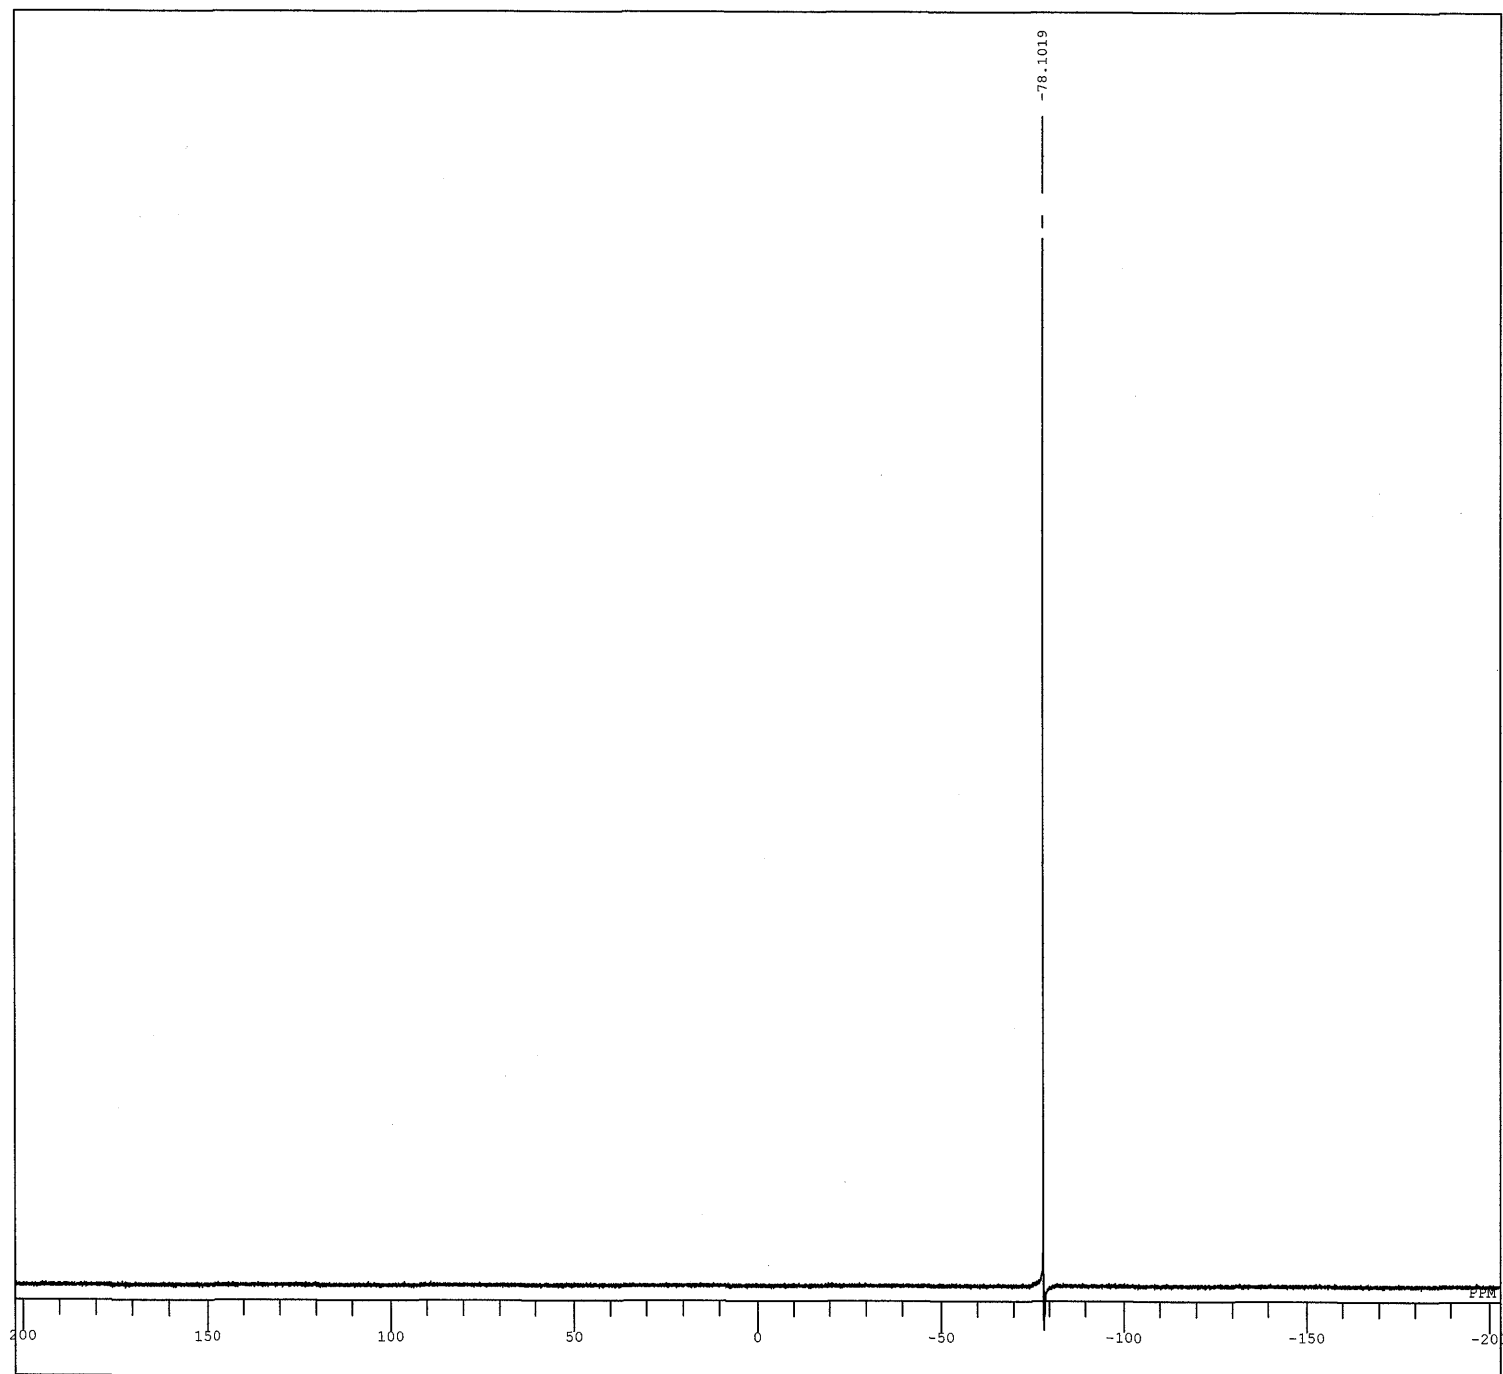

DFILE ozawa04-007\_19F.jdf  
COMNT hexOH, Bn  
DATIM 15-03-2014 15:14:02  
OBNUC 19F  
EXMOD proton.jxp  
OBFREQ 368.64 MHz  
OBSETE 7.63 KHz  
OBFIN 2.85 Hz  
POINT 16384  
FREQU 186567.17 Hz  
SCANS 8  
ACQTM 0.0878 sec  
PD 5.0000 sec  
PW1 3.90 usec  
IRNUC 19F  
CTEMP 20.9 c  
SLVNT CDCL3  
EXREF -164.90 ppm  
BF 0.12 Hz  
RGAIN 46

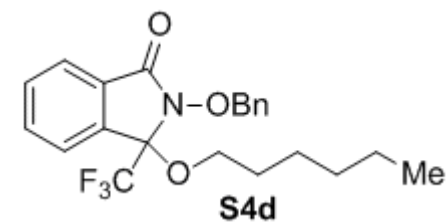

hexOH, OH

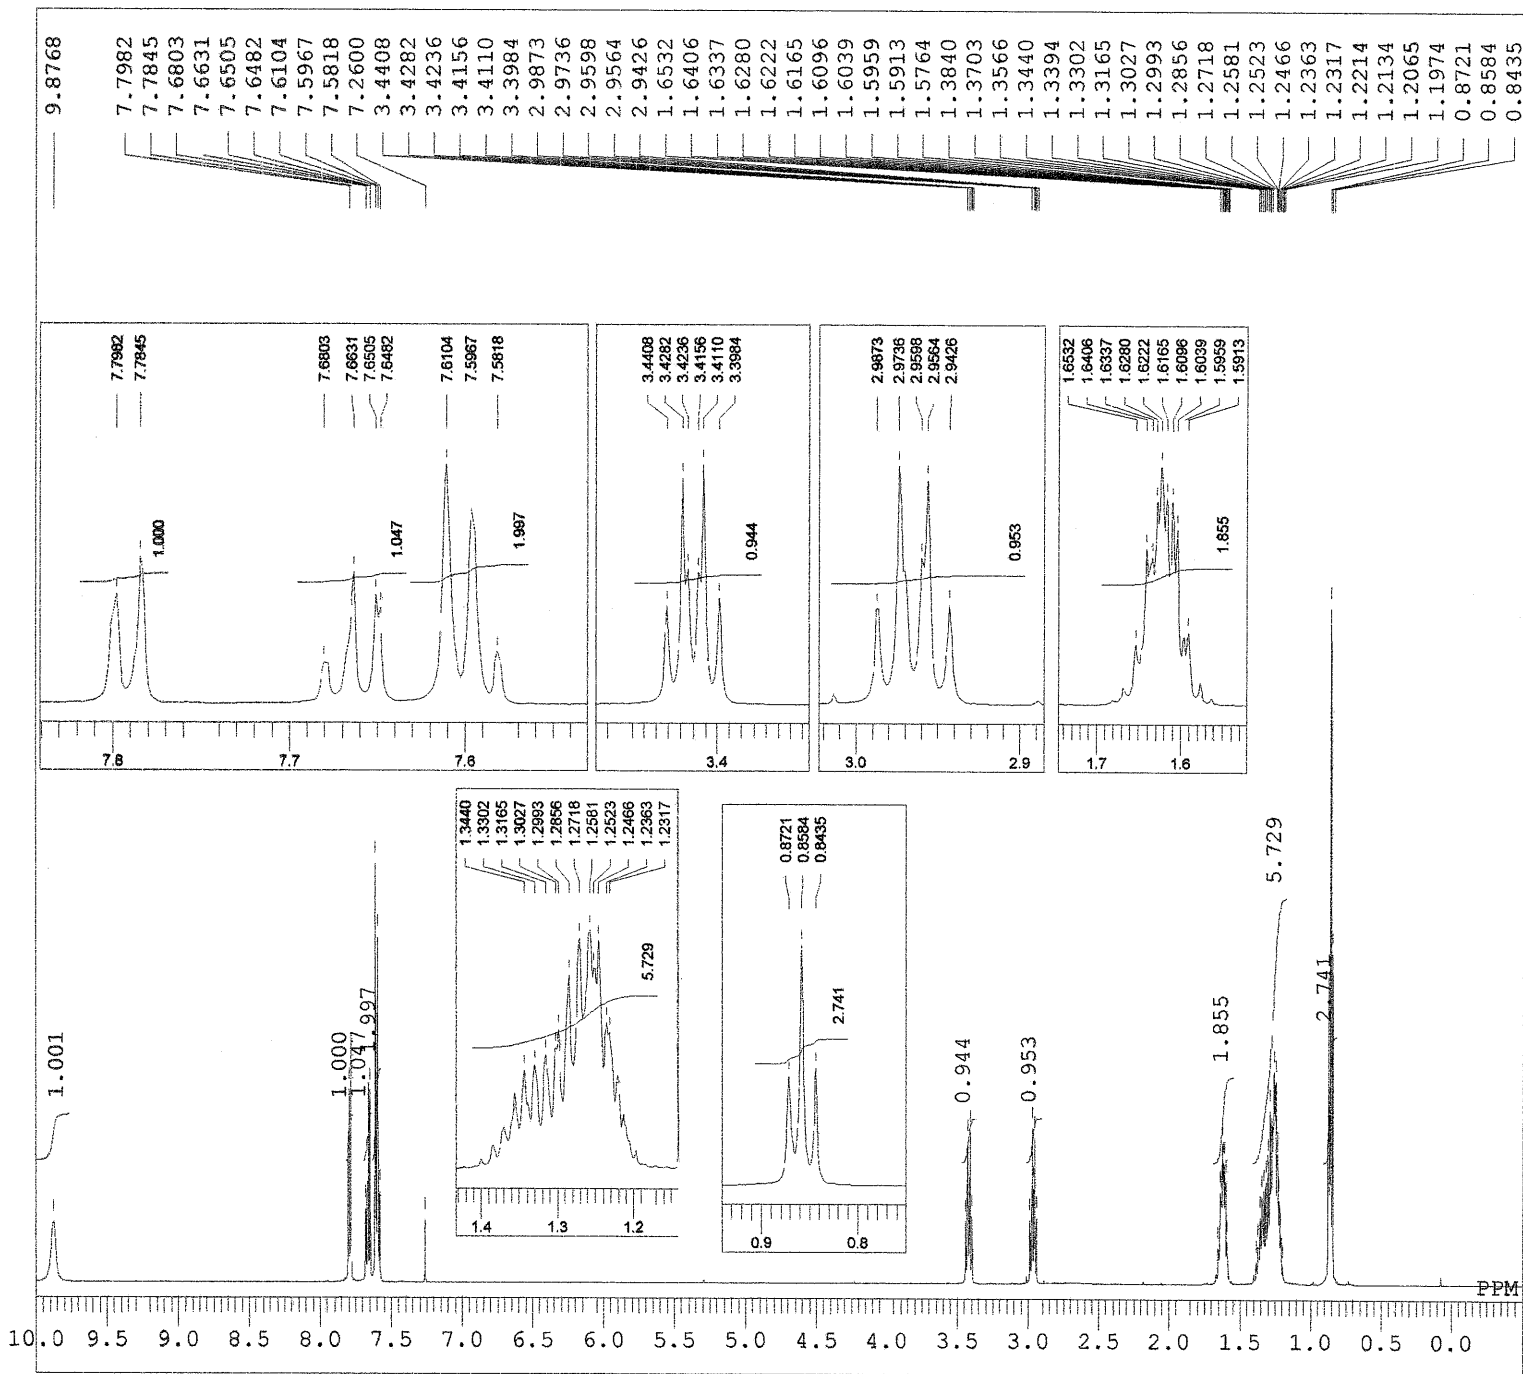

DFILE ozawa04-010\_1H.jdf  
COMNT hexOH, OH  
DATIM 2014-01-17 19:39:58  
OBNUC 1H  
EXMOD proton.jxp  
OBFRQ 500.16 MHz  
OBSET 2.41 KHz  
OBFIN 6.01 Hz  
POINT 16384  
FREQU 9384.38 Hz  
SCANS 4  
ACQTM 1.7459 sec  
PD 5.0000 sec  
PW1 5.55 usec  
IRNUC 1H  
CTEMP 21.5 c  
SLVNT CDCL3  
EXREF 7.26 ppm  
BF 0.12 Hz  
RGAIN 28

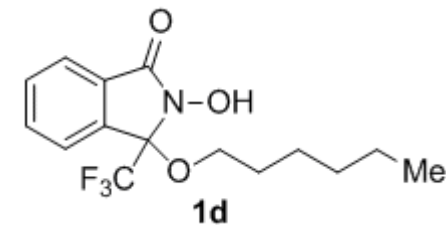

hexOH, OH

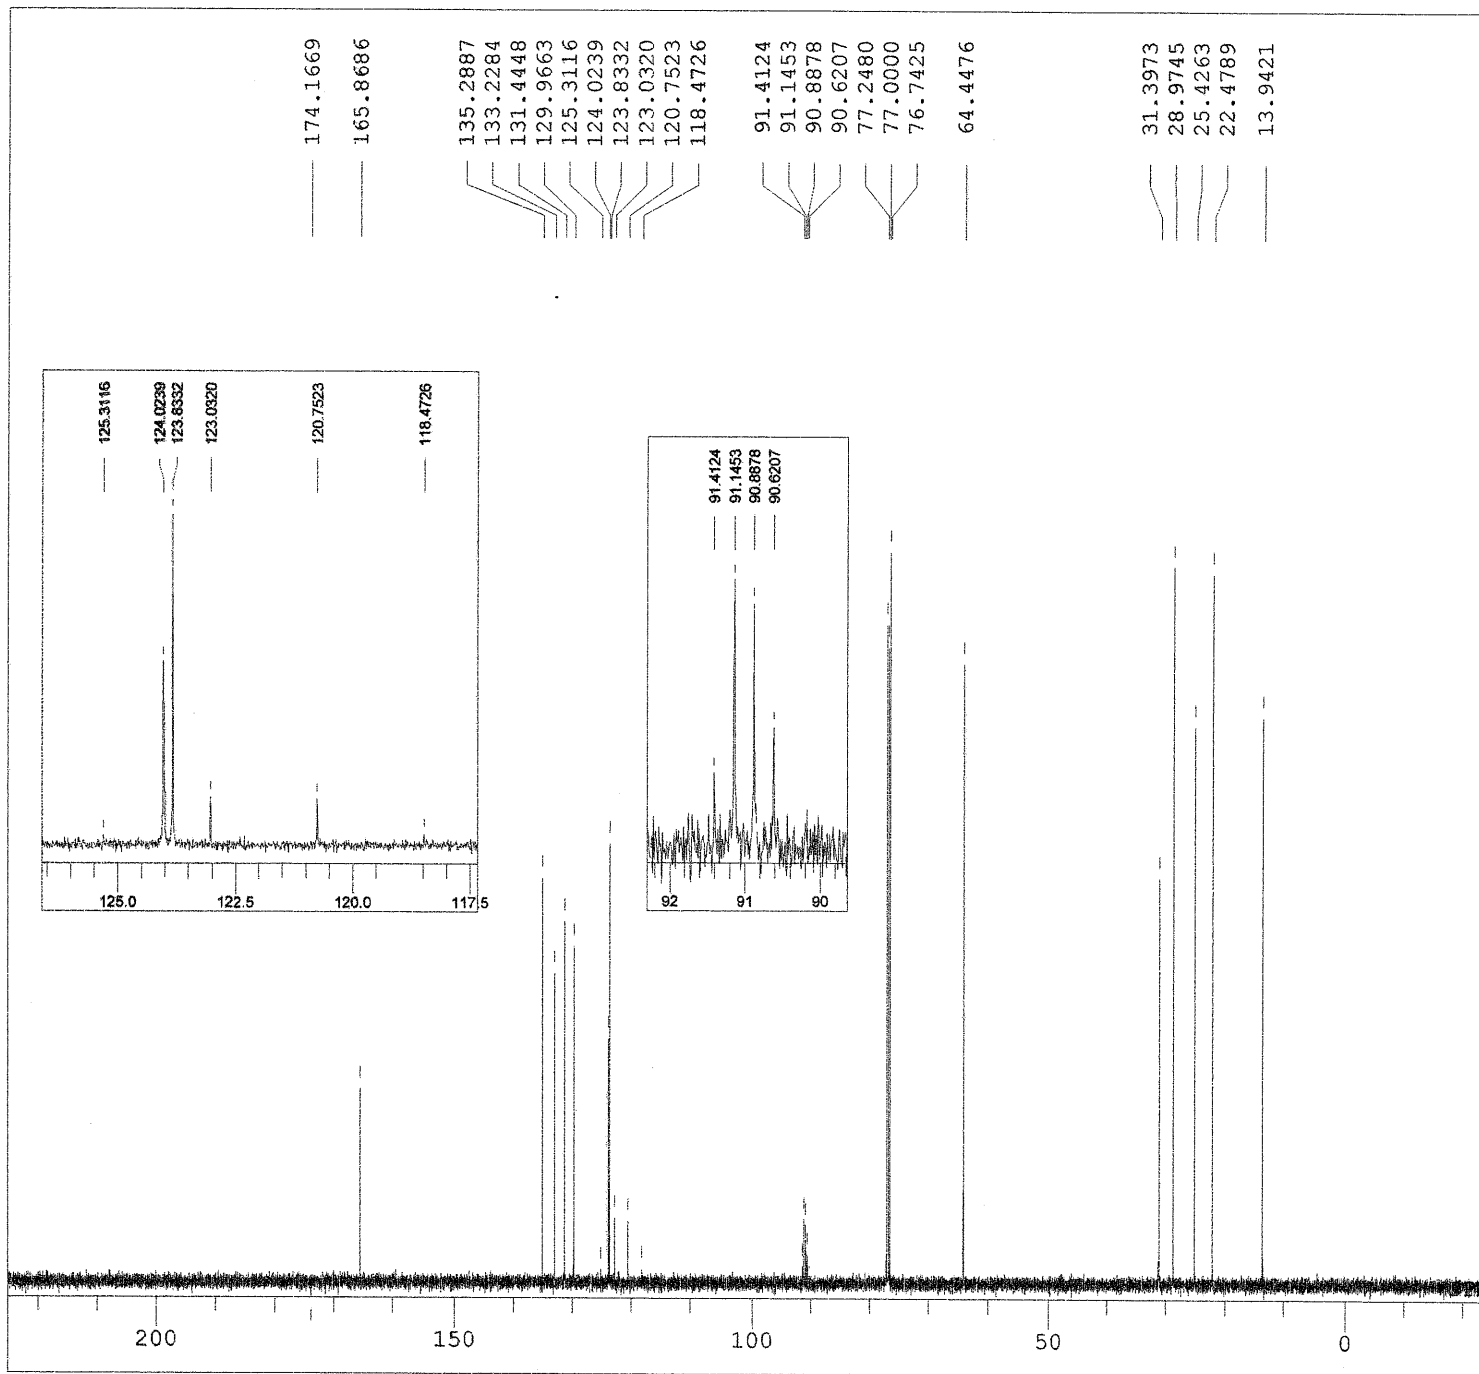

DFILE ozawa04-010\_13C.jdf  
COMNT hexOH, OH  
DATIM 2014-01-17 19:41:00  
OBNUC 13C  
EXMOD carbon.jxp  
OBFRQ 125.77 MHz  
OBSET 7.87 KHz  
OBFIN 4.21 Hz  
POINT 32767  
FREQU 39308.18 Hz  
SCANS 164  
ACQTM 0.8336 sec  
PD 3.0000 sec  
PW1 3.40 usec  
IRNUC 1H  
CTEMP 21.7 c  
SLVNT CDCL3  
EXREF 77.00 ppm  
BF 0.12 Hz  
RGAIN 60

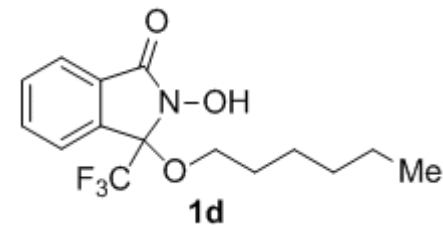

hexanol, OH

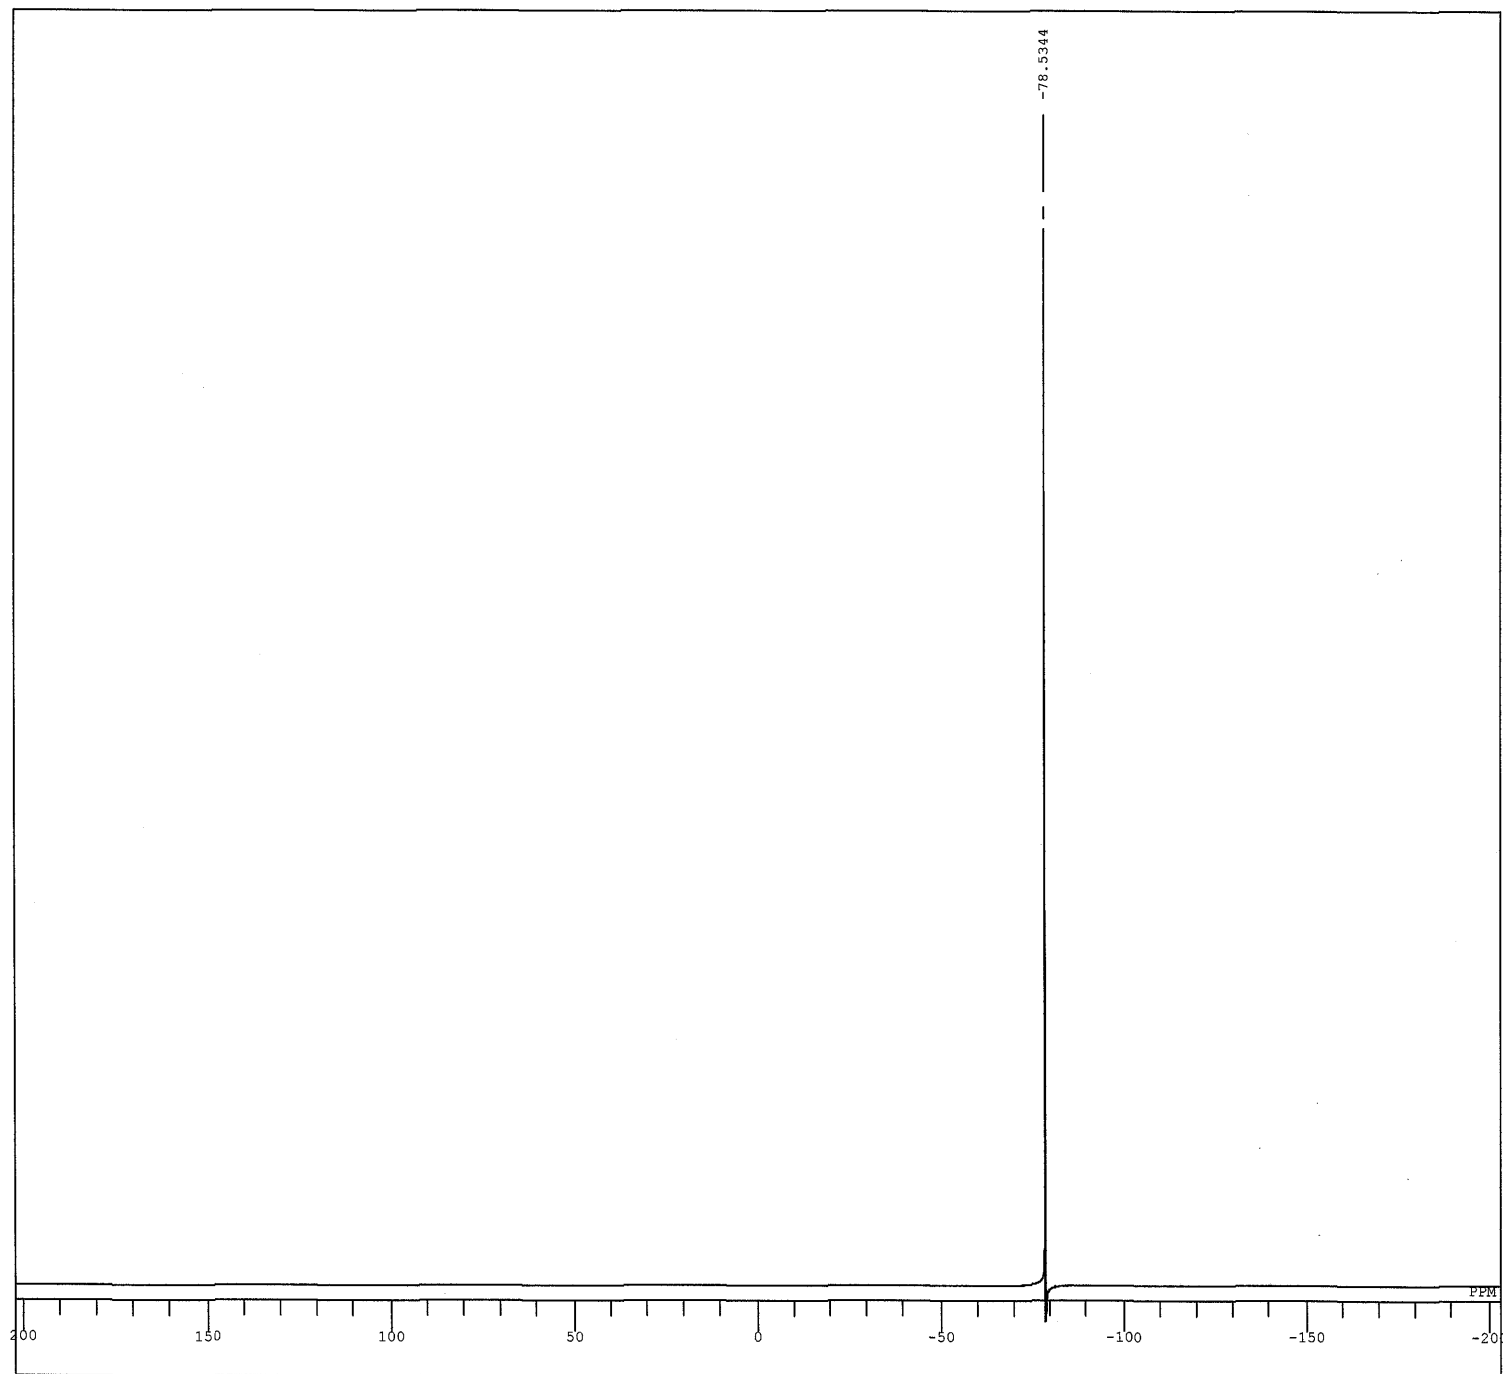

DFILE ozawa04-010\_19F.jdf  
COMNT hexanol, OH  
DATIM 17-01-2014 13:04:22  
OBNUC 19F  
EXMOD proton.jxp  
OBFRQ 368.64 MHz  
OBSET 7.63 KHz  
OBFIN 2.85 Hz  
POINT 16384  
FREQU 186567.17 Hz  
SCANS 4  
ACQTM 0.0878 sec  
PD 5.0000 sec  
PW1 3.90 usec  
IRNUC 19F  
CTEMP 20.9 c  
SLVNT CDCL3  
EXREF -164.90 ppm  
BF 0.12 Hz  
RGAIN 44

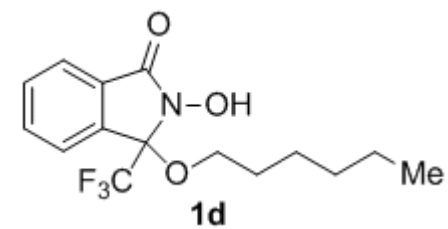

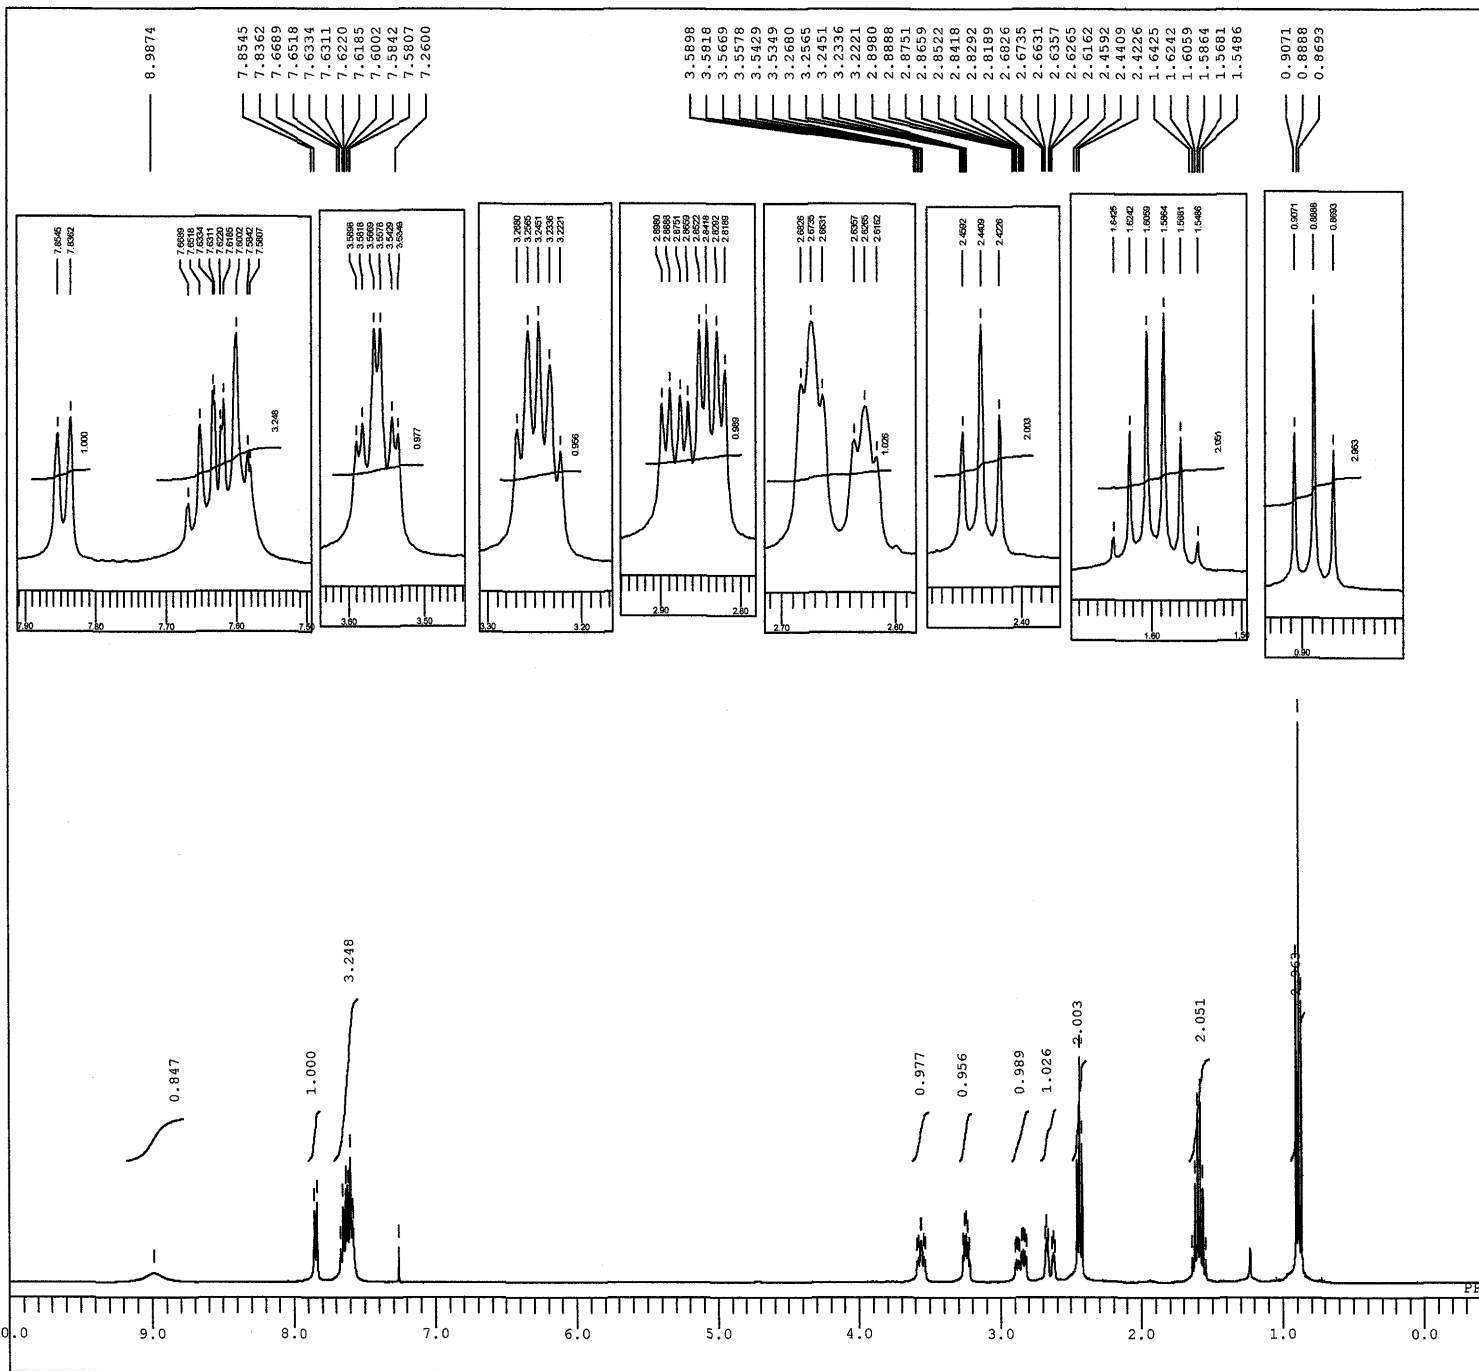

```

DFILE ozawa05-017_1_1H.jdf
COMNT hex, [O], LP
DATIM 28-05-2014 20:50:45
OBNUC 1H
EXMOD proton.jxp
OBFREQ 391.78 MHz
OBSETE 8.51 KHz
OBFIN 3.34 Hz
POINT 16384
FREQU 7352.94 Hz
SCANS 4
ACQTM 2.2282 sec
PD 5.0000 sec
PW1 5.25 usec
IRNUC 1H
CTEMP 23.6 c
SLVNT CDCL3
EXREF 7.26 ppm
BF 0.12 Hz
RGAIN 26
    
```

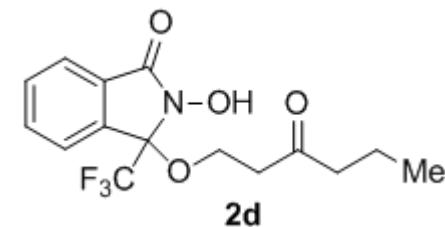



hex, [0], LP

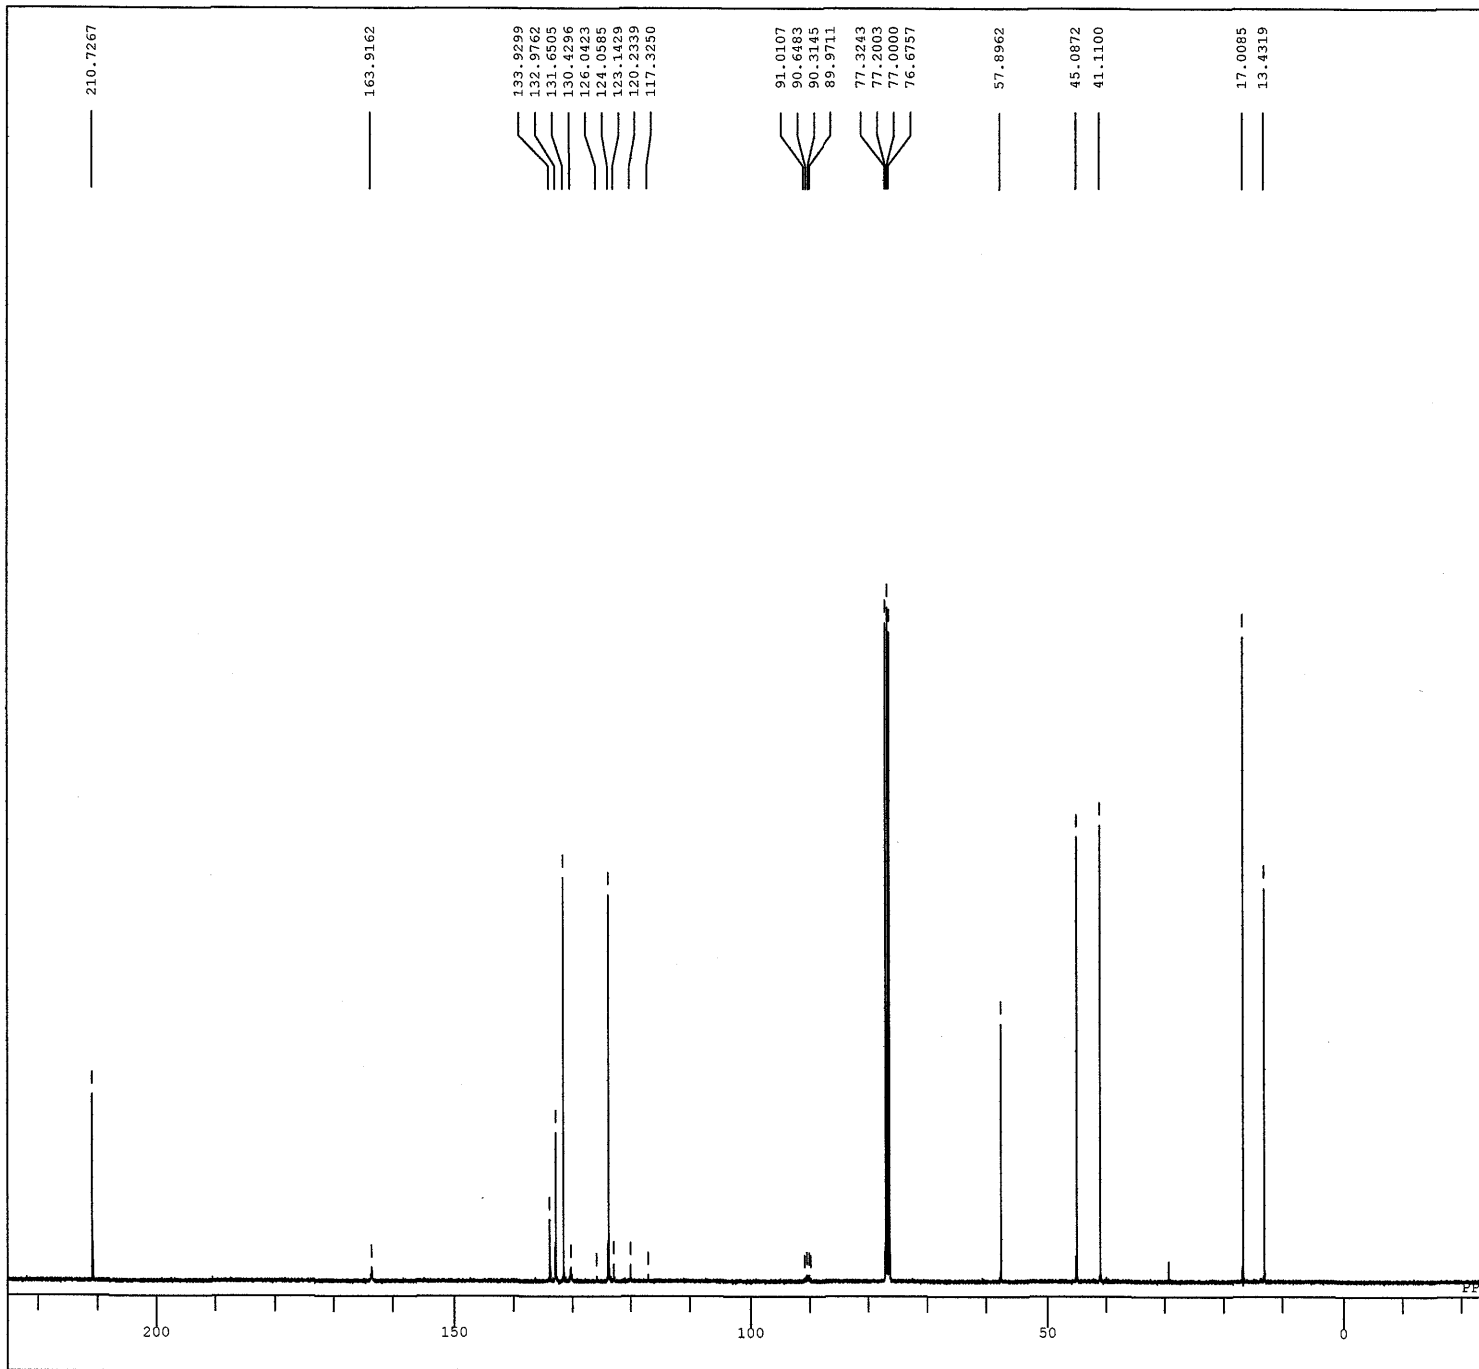

DFILE ozawa05-017\_1\_13C.als  
COMNT hex, [0], LP  
DATIM 28-05-2014 23:01:37  
OBNUC 13C  
EXMOD carbon.jxp  
OBFRQ 98.52 MHz  
OBSET 4.64 KHz  
OBFIN 8.74 Hz  
POINT 26214  
FREQU 24630.54 Hz  
SCANS 7000  
ACQTM 1.0643 sec  
PD 3.0000 sec  
PW1 3.00 usec  
IRNUC 1H  
CTEMP 23.7 c  
SLVNT CDCL3  
EXREF 77.00 ppm  
BF 0.12 Hz  
RGAIN 60

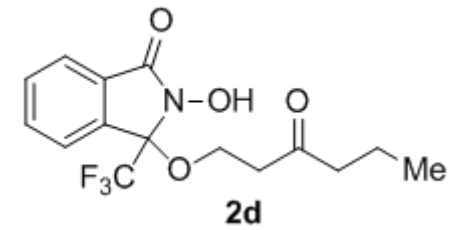

hex, [0], LP

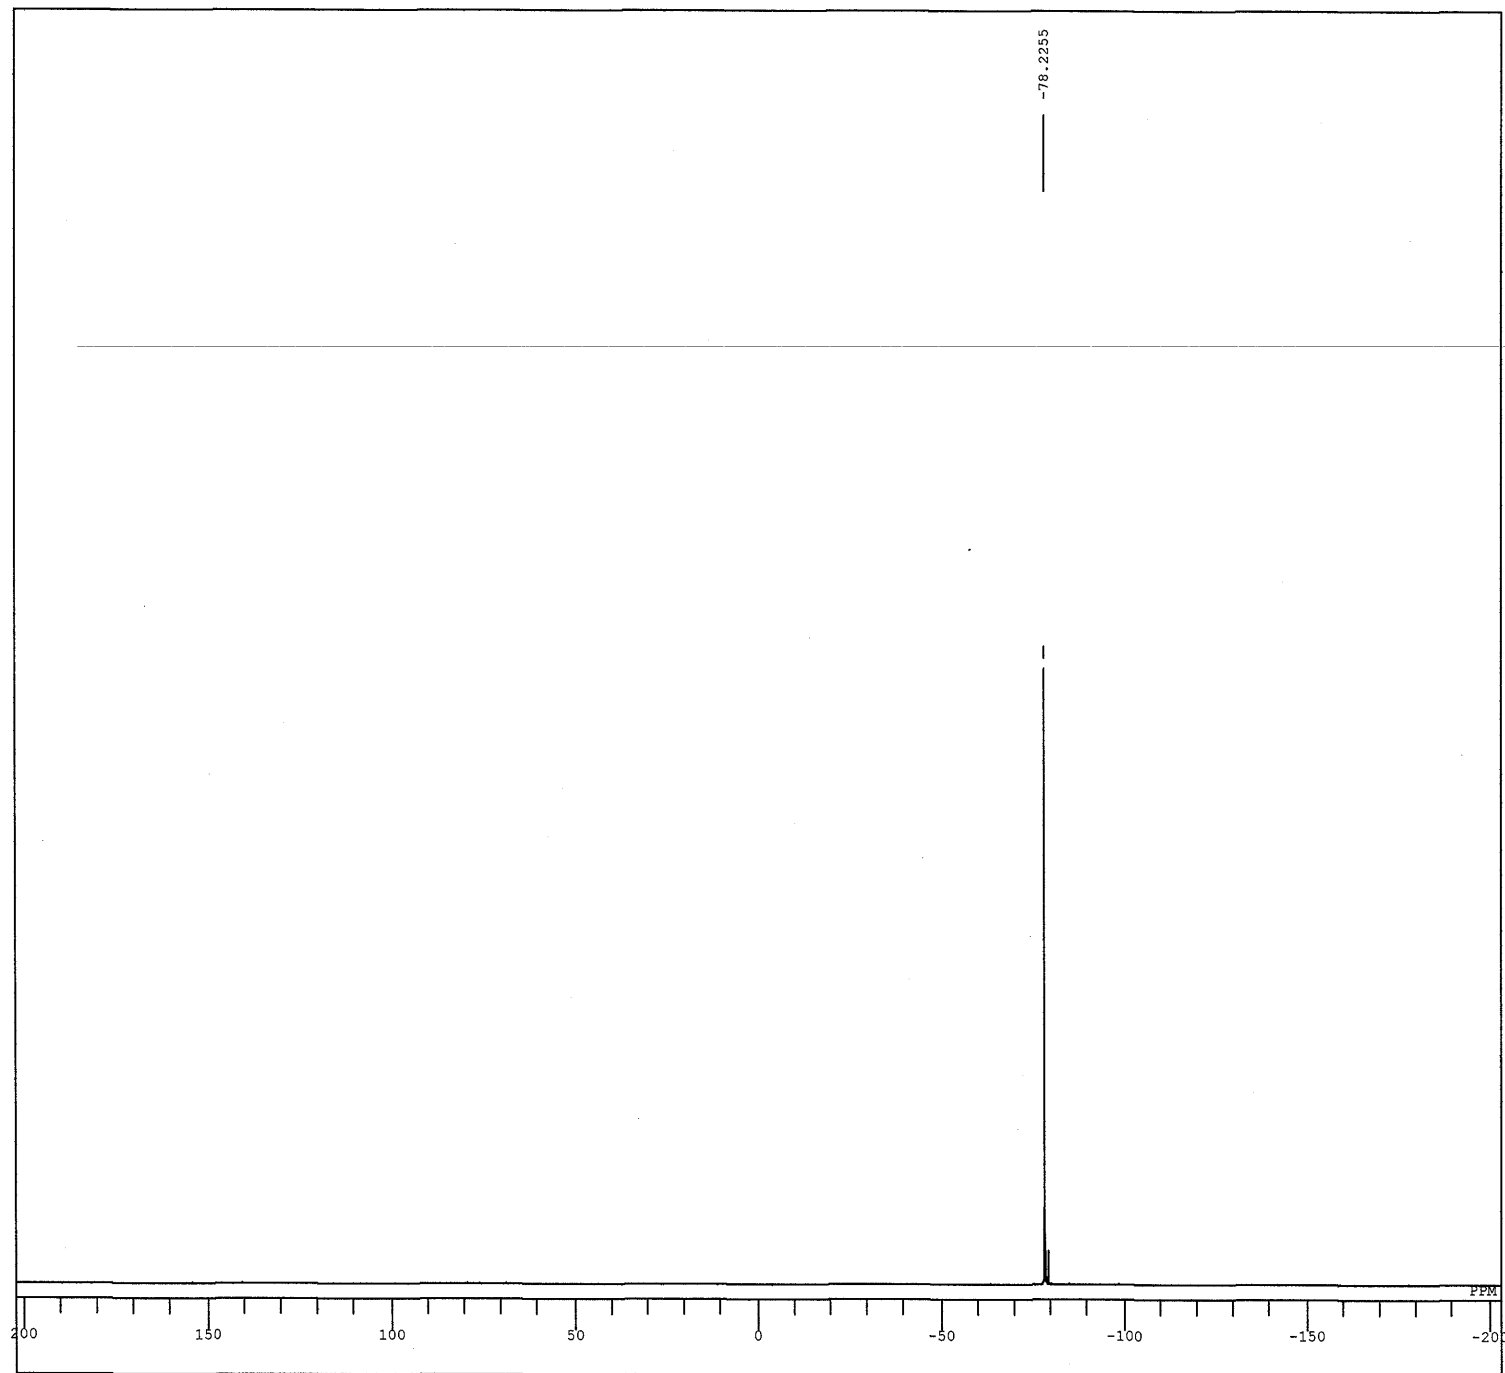

DFILE ozawa05-017\_1\_19F.jdf  
COMNT hex, [0], LP  
DATIM 28-05-2014 20:48:29  
OBNUC 19F  
EXMOD proton.jxp  
OBFRQ 368.64 MHz  
OBSET 7.63 KHz  
OBFIN 2.85 Hz  
POINT 16384  
FREQU 186567.17 Hz  
SCANS 4  
ACQTM 0.0878 sec  
PD 5.0000 sec  
PW1 3.90 usec  
IRNUC 19F  
CTEMP 23.6 c  
SLVNT CDCL3  
EXREF -164.90 ppm  
BF 0.12 Hz  
RGAIN 44

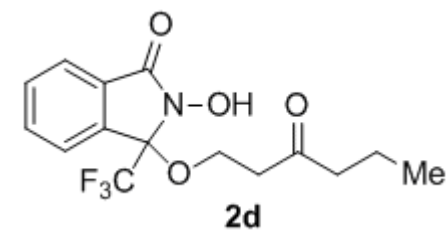

hex, [O], MP

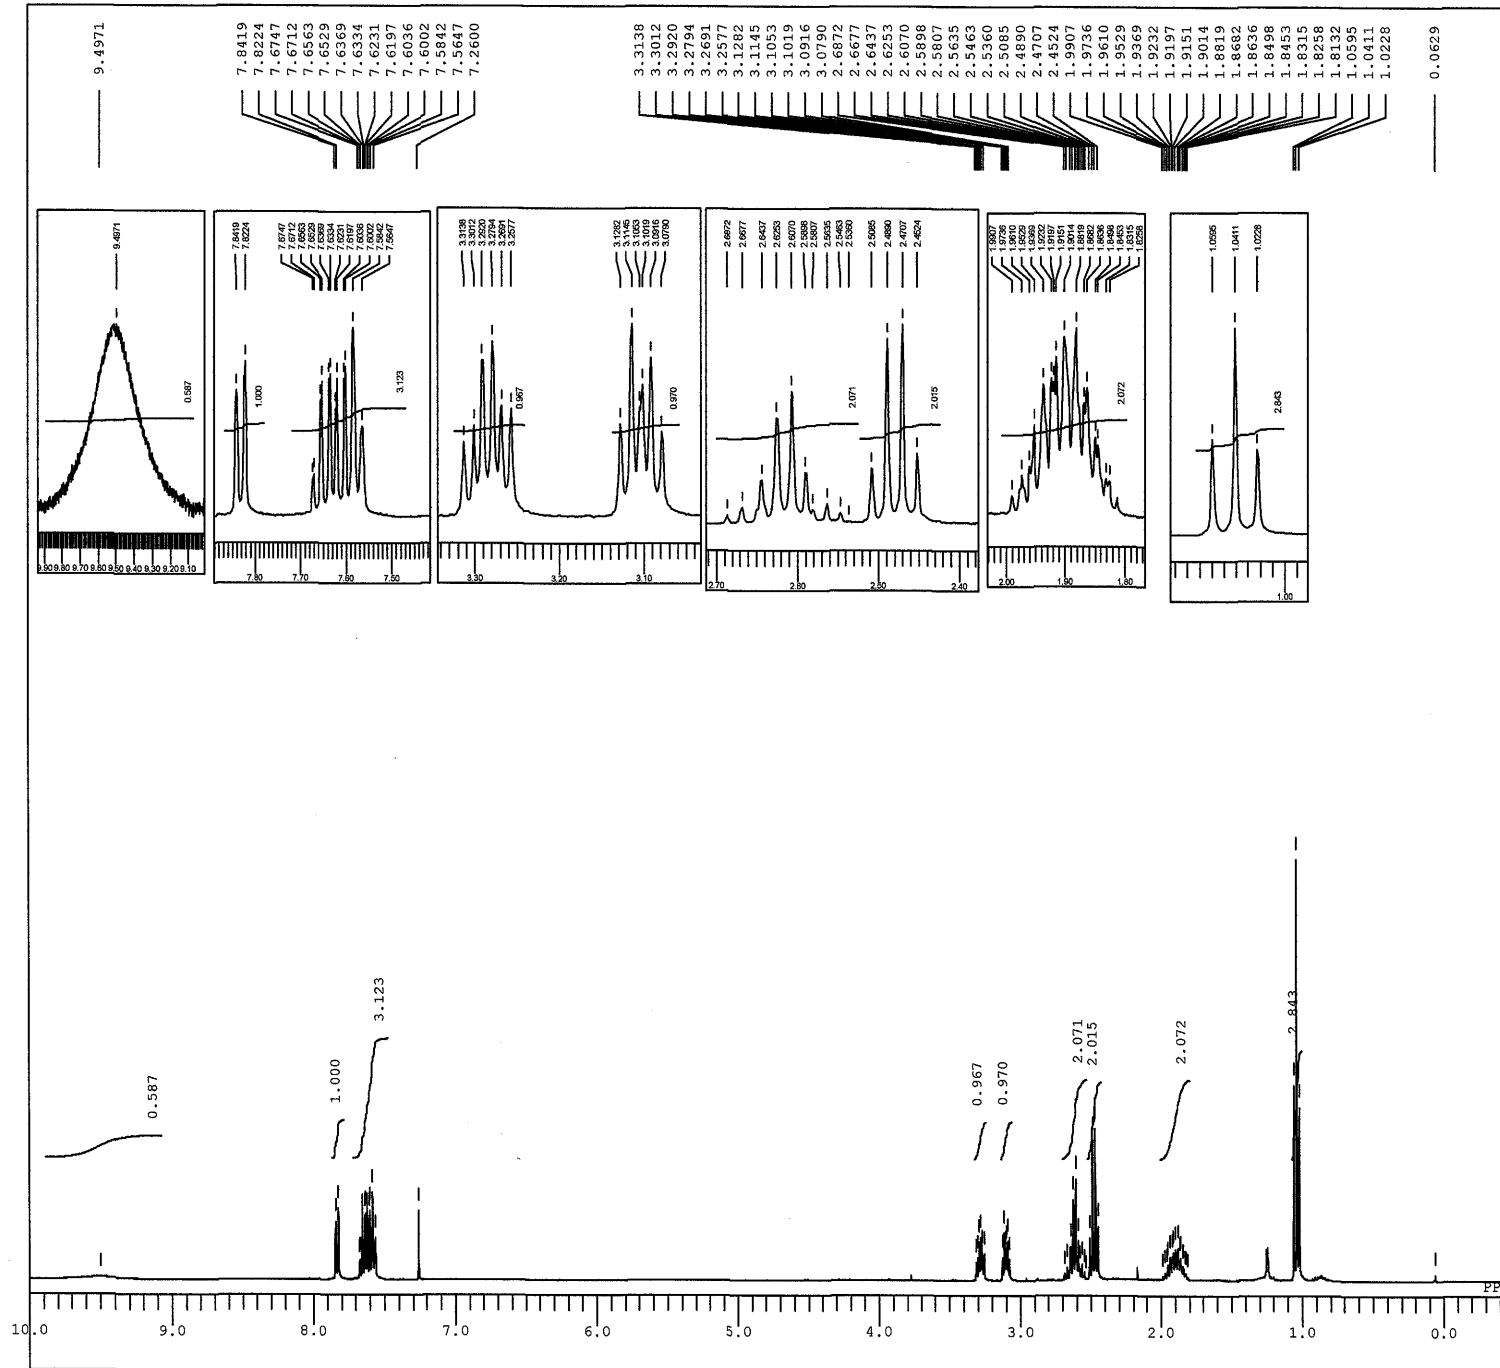

DFILE ozawa05-017\_2\_1H.jdf  
COMNT hex, [O], MP  
DATIM 28-05-2014 20:41:38  
OBNUC 1H  
EXMOD proton.jxp  
OBFREQ 391.78 MHz  
OBSET 8.51 KHz  
OBFIN 3.34 Hz  
POINT 16384  
FREQ 7352.94 Hz  
SCANS 4  
ACQTM 2.2282 sec  
PD 5.0000 sec  
PW1 5.25 usec  
IRNUC 1H  
CTEMP 23.6 c  
SIVNT CDCL3  
EXREF 7.26 ppm  
BF 0.12 Hz  
RGAIN 30

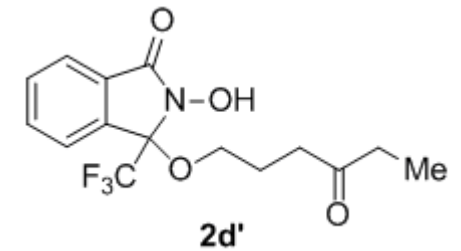

hex, [O], MP

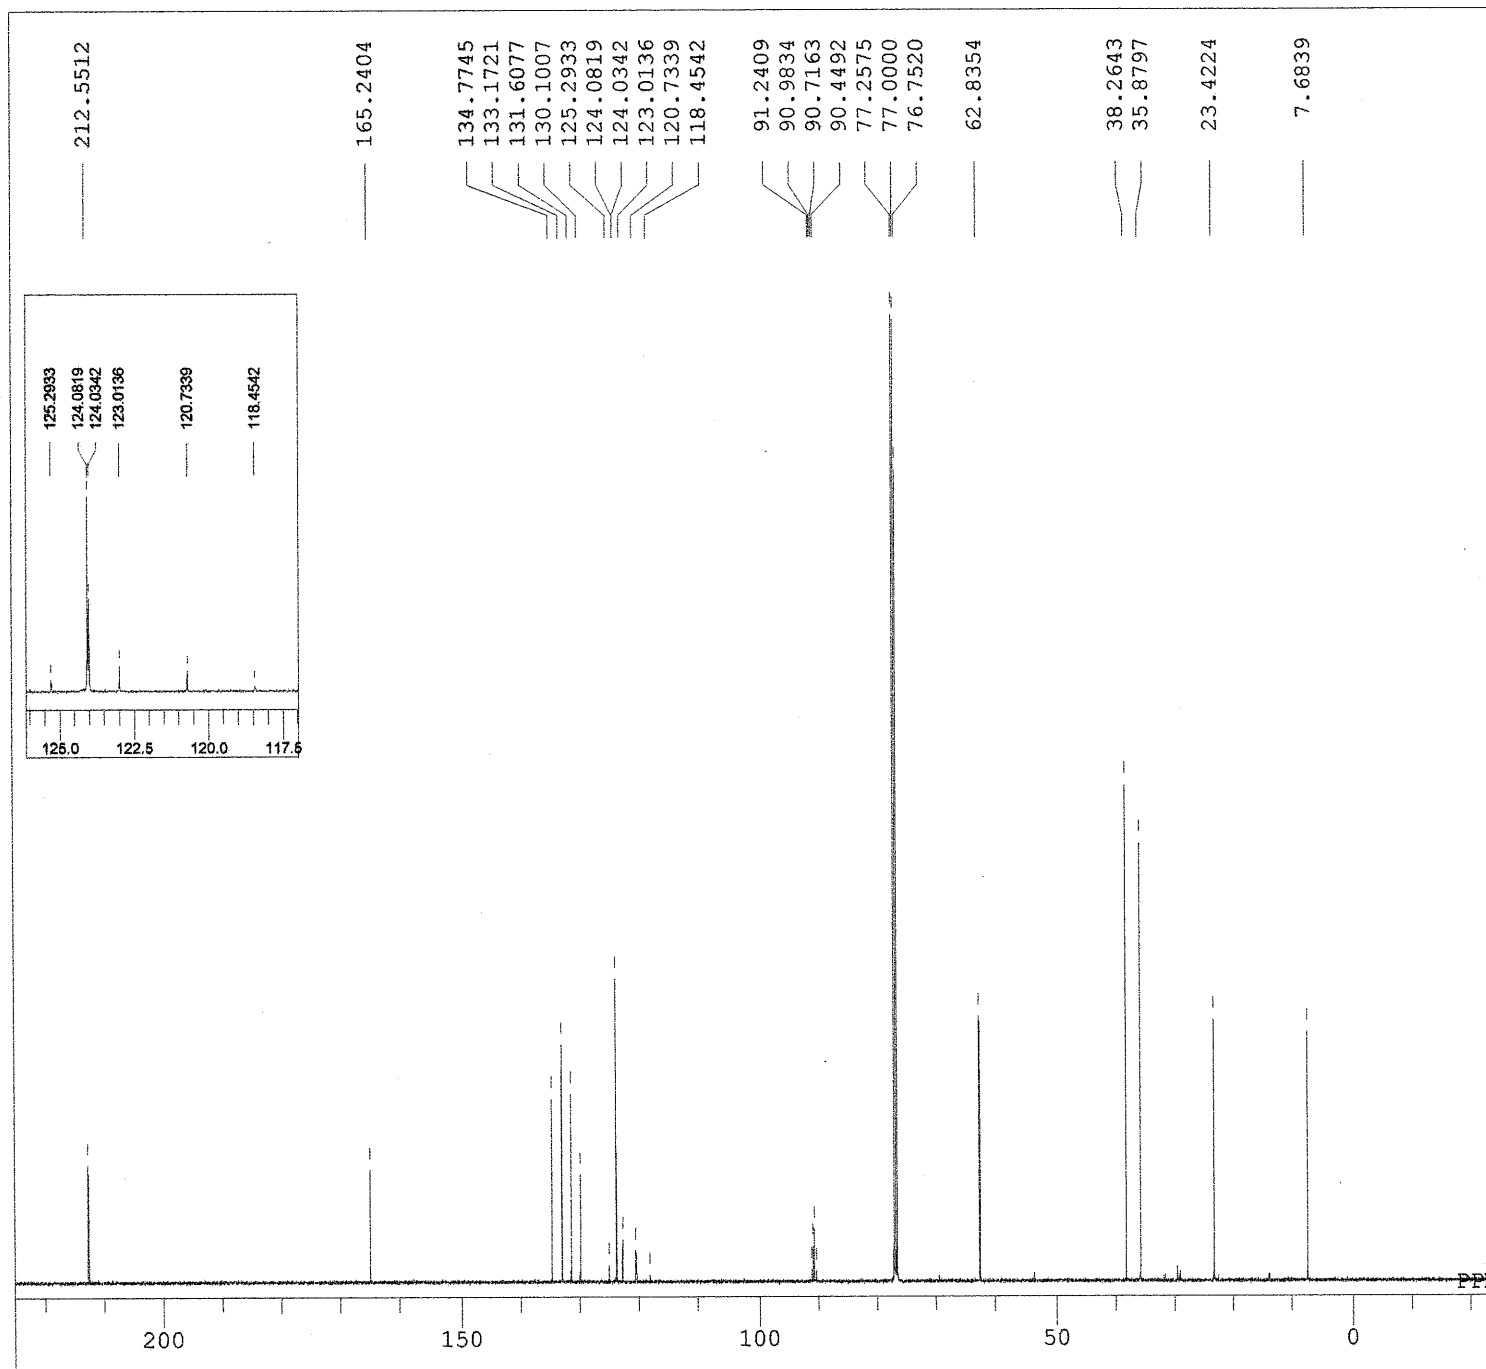

DFILE ozawa05-017\_2\_13C.als  
COMNT hex, [O], MP  
DATIM 2014-05-28 22:52:51  
OBNUC 13C  
EXMOD carbon.jxp  
OBFRQ 125.77 MHz  
OBSET 7.87 KHz  
OBFIN 4.21 Hz  
POINT 26214  
FREQU 31446.54 Hz  
SCANS 10000  
ACQTM 0.8336 sec  
PD 3.0000 sec  
PW1 3.40 usec  
IRNUC 1H  
CTEMP 26.4 c  
SLVNT CDCL3  
EXREF 77.00 ppm  
BF 0.12 Hz  
RGAIN 60

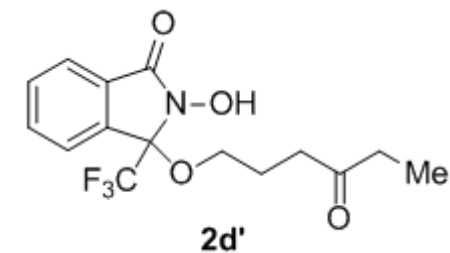

hex, [0], MP

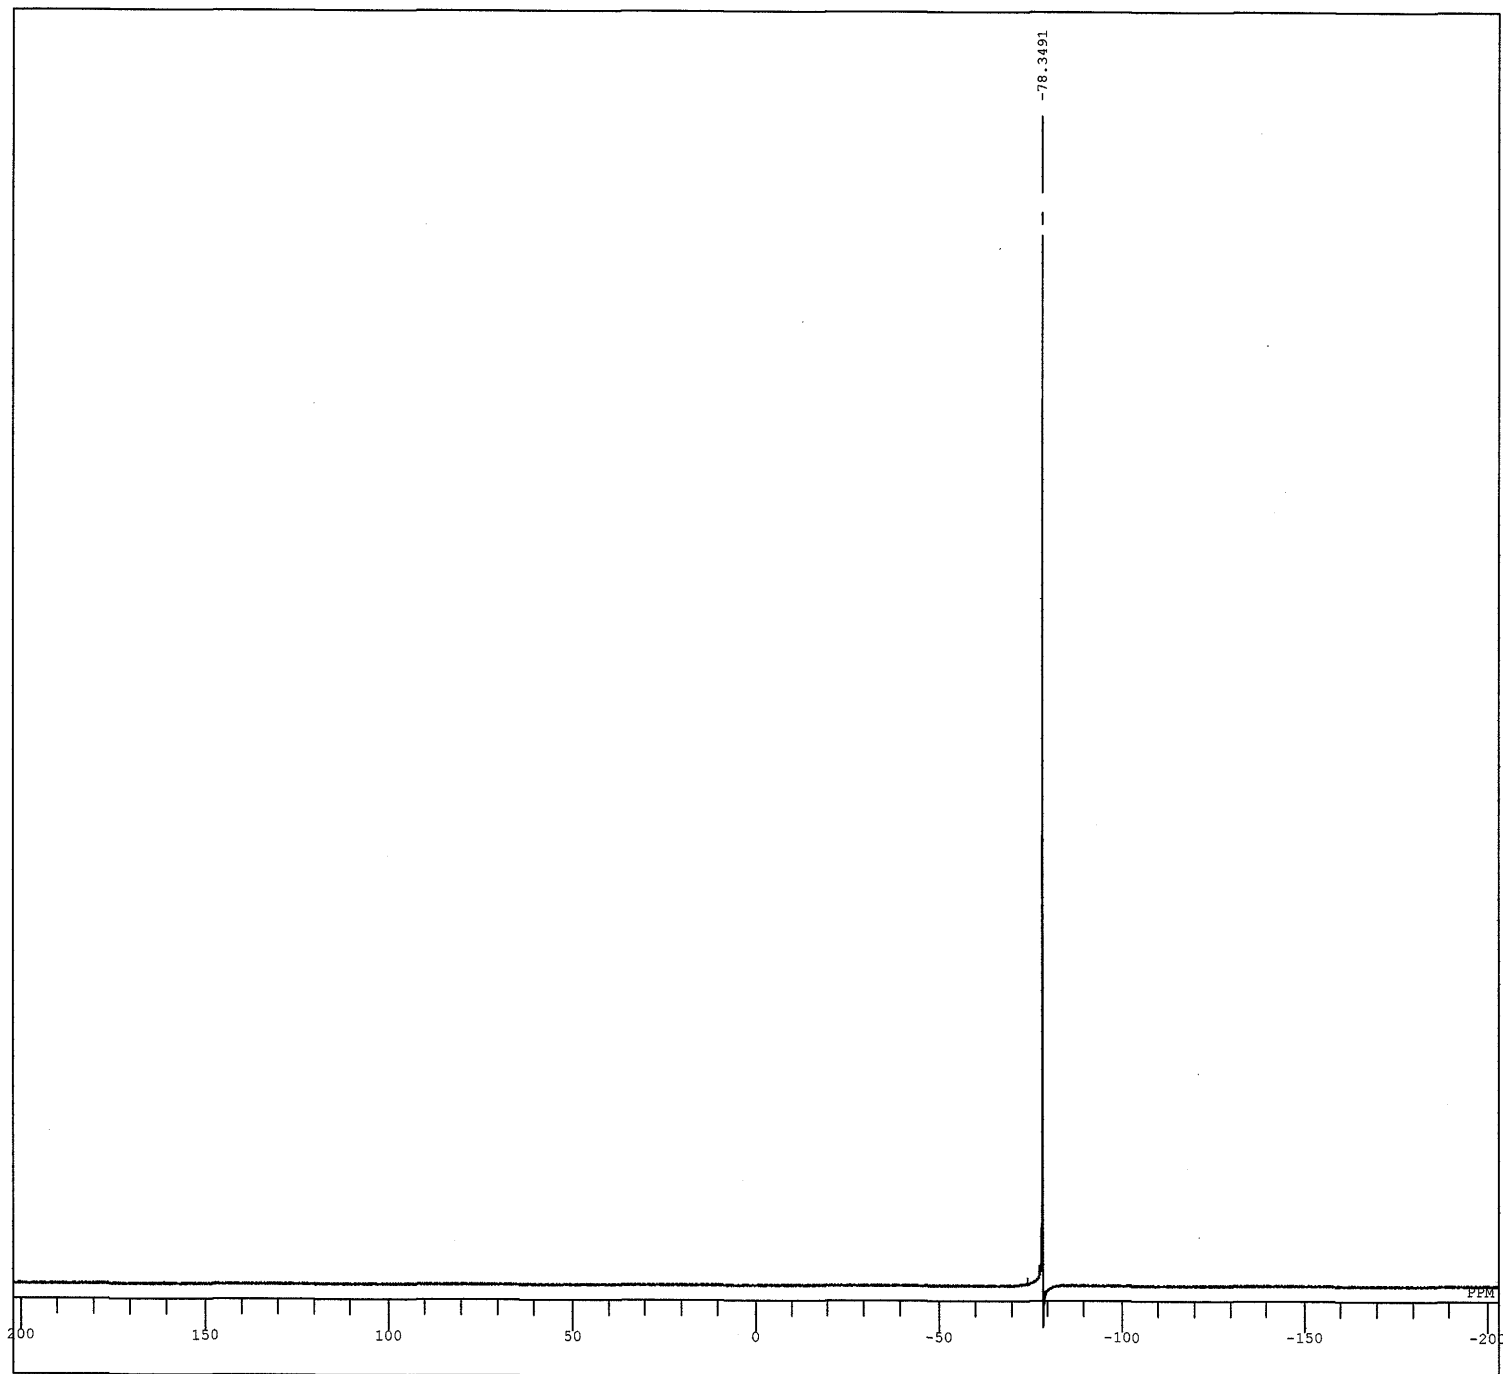

DFILE ozawa05-017\_2\_19F.jdf  
COMNT hex, [0], MP  
DATIM 28-05-2014 20:43:43  
OBNUC 19F  
EXMOD proton.jxp  
OBFRQ 368.64 MHz  
OBSEF 7.63 KHz  
OBFIN 2.85 Hz  
POINT 16384  
FREQU 186567.17 Hz  
SCANS 4  
ACQTM 0.0878 sec  
PD 5.0000 sec  
PW1 3.90 usec  
IRNUC 19F  
CTEMP 23.6 c  
SLVNT CDCL3  
EXREF -164.90 ppm  
BF 0.12 Hz  
RGAIN 46

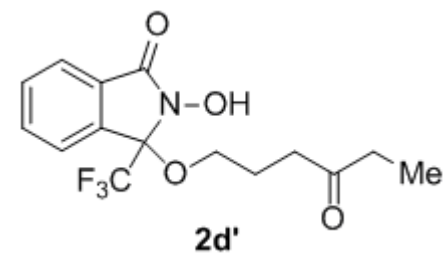

OAc, Bn

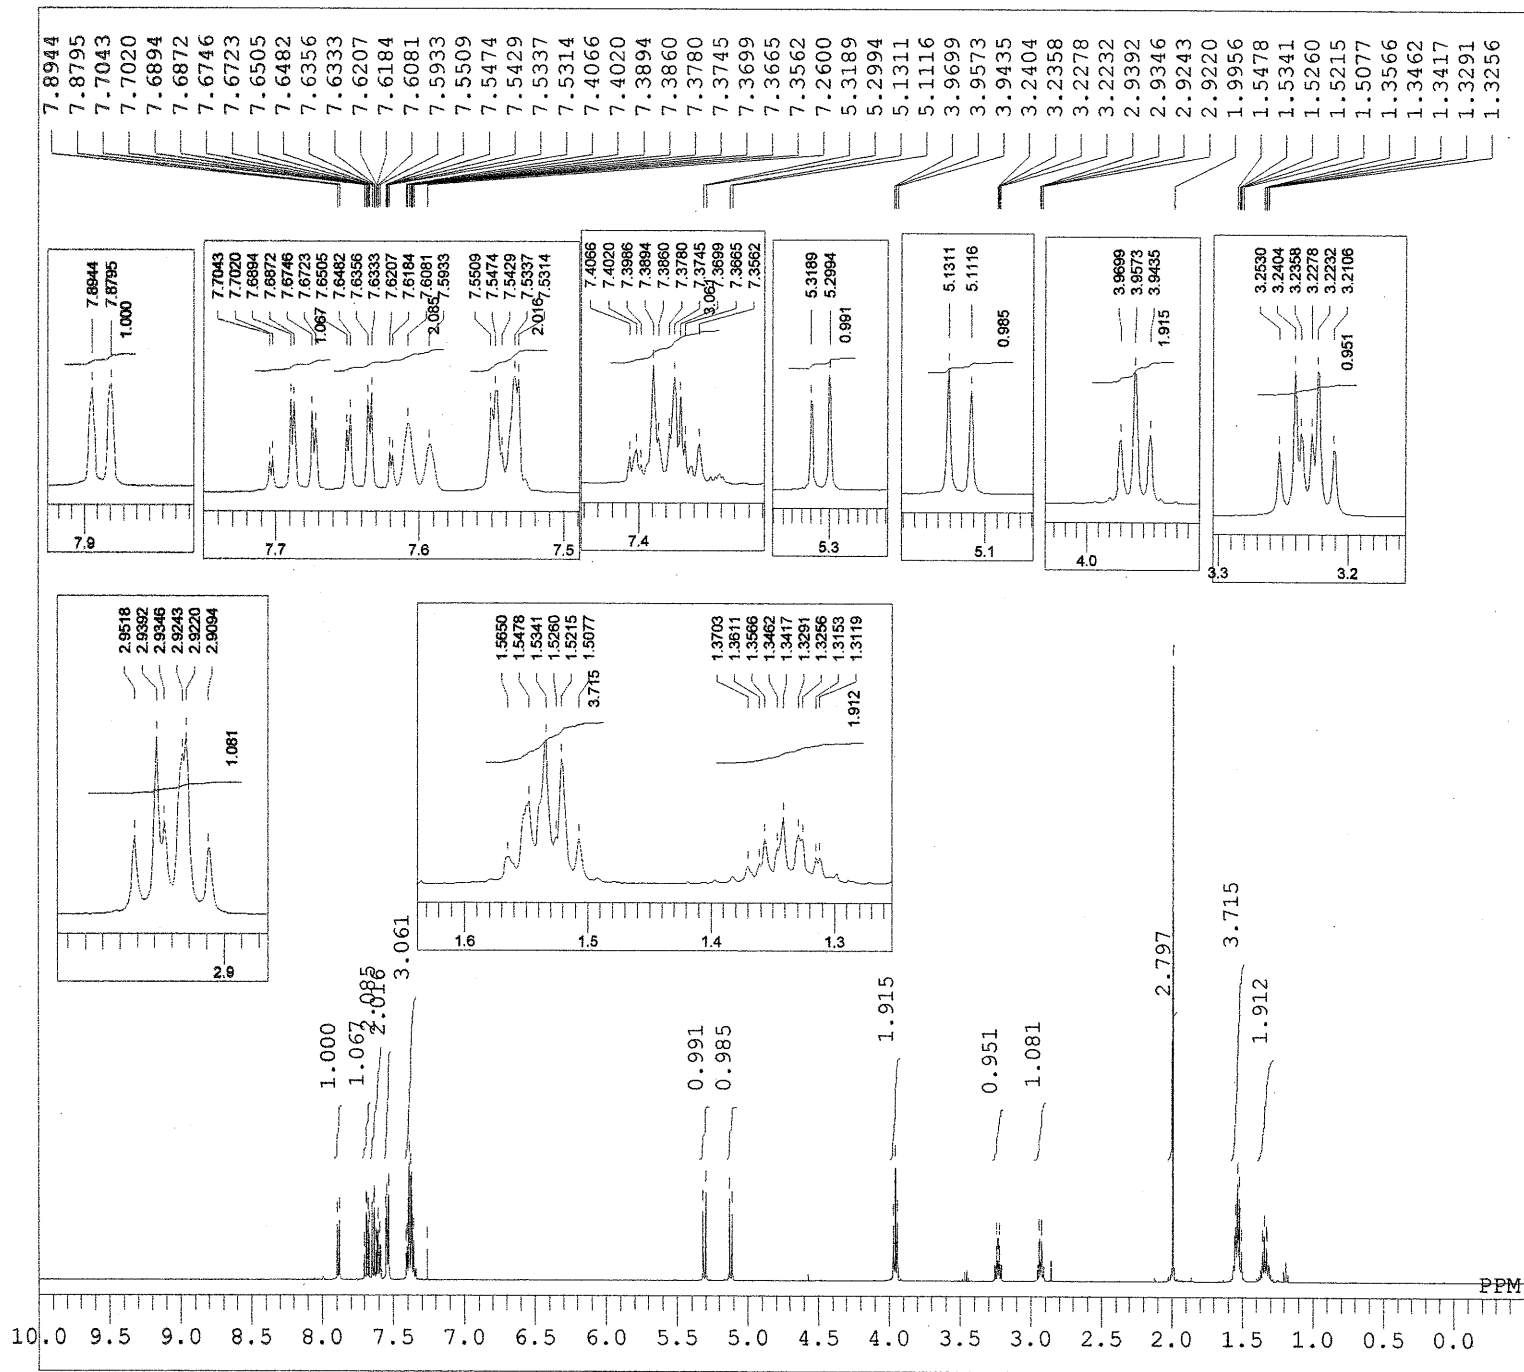

DFILE ozawa04-122\_1\_C\_1H.jdf  
 COMNT OAc, Bn  
 DATIM 2014-02-02 13:56:54  
 OBNUC 1H  
 EXMOD proton.jxp  
 OBFRQ 500.16 MHz  
 OBSET 2.41 KHz  
 OBFIN 6.01 Hz  
 POINT 16384  
 FREQU 9384.38 Hz  
 SCANS 4  
 ACQTM 1.7459 sec  
 PD 5.0000 sec  
 PW1 5.55 usec  
 IRNUC 1H  
 CTEMP 21.2 c  
 SLVNT CDCL3  
 EXREF 7.26 ppm  
 BF 0.12 Hz  
 RGAIN 28

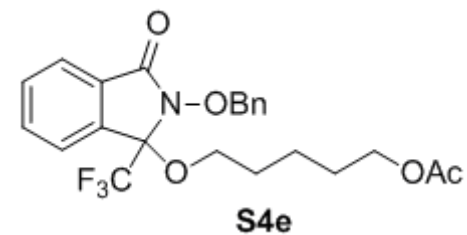

OAc, Bn

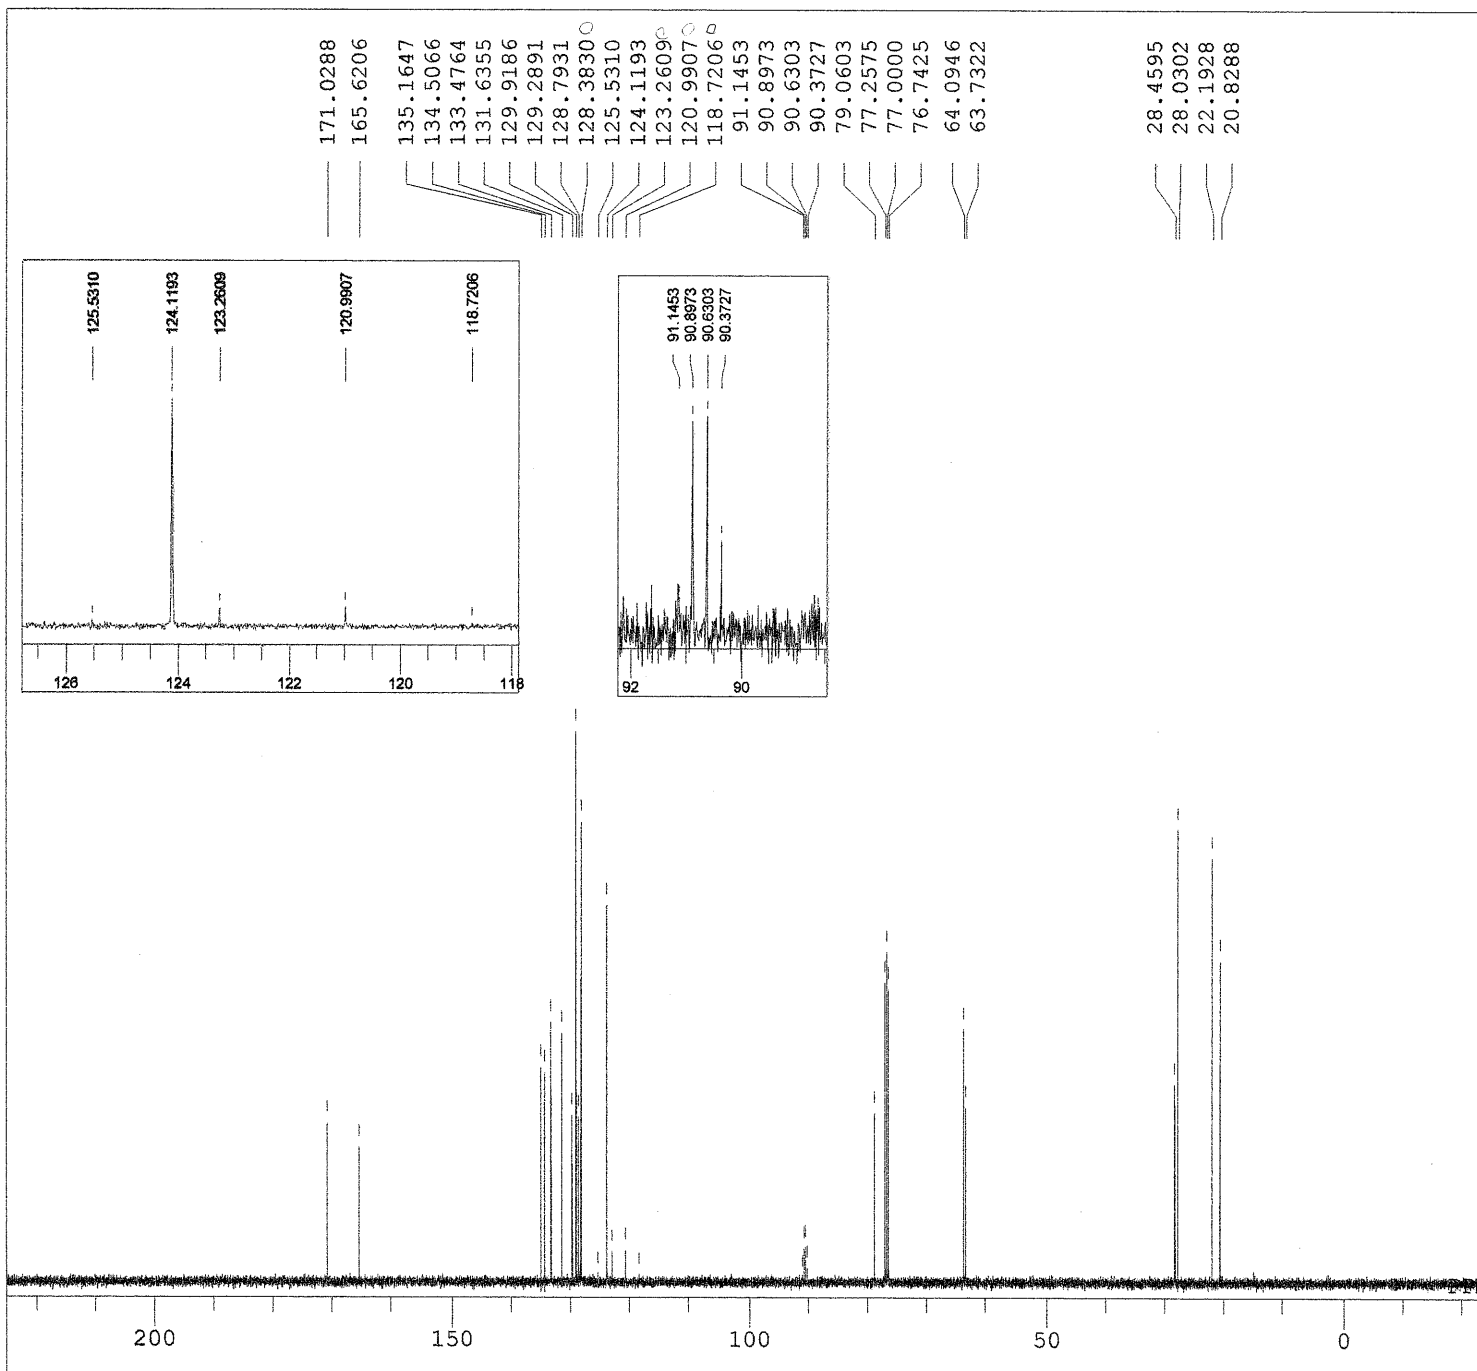

DFILE ozawa04-122\_1\_C\_13C.jdf  
COMNT OAc, Bn  
DATIM 2014-02-02 13:57:58  
OBNUC 13C  
EXMOD carbon.jxp  
OBFRQ 125.77 MHz  
OBSET 7.87 KHz  
OBFIN 4.21 Hz  
POINT 32767  
FREQU 39308.18 Hz  
SCANS 88  
ACQTM 0.8336 sec  
PD 3.0000 sec  
PW1 3.40 usec  
IRNUC 1H  
CTEMP 22.1 c  
SLVNT CDCL3  
EXREF 77.00 ppm  
BF 0.12 Hz  
RGAIN 60

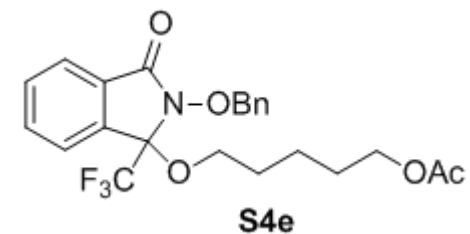

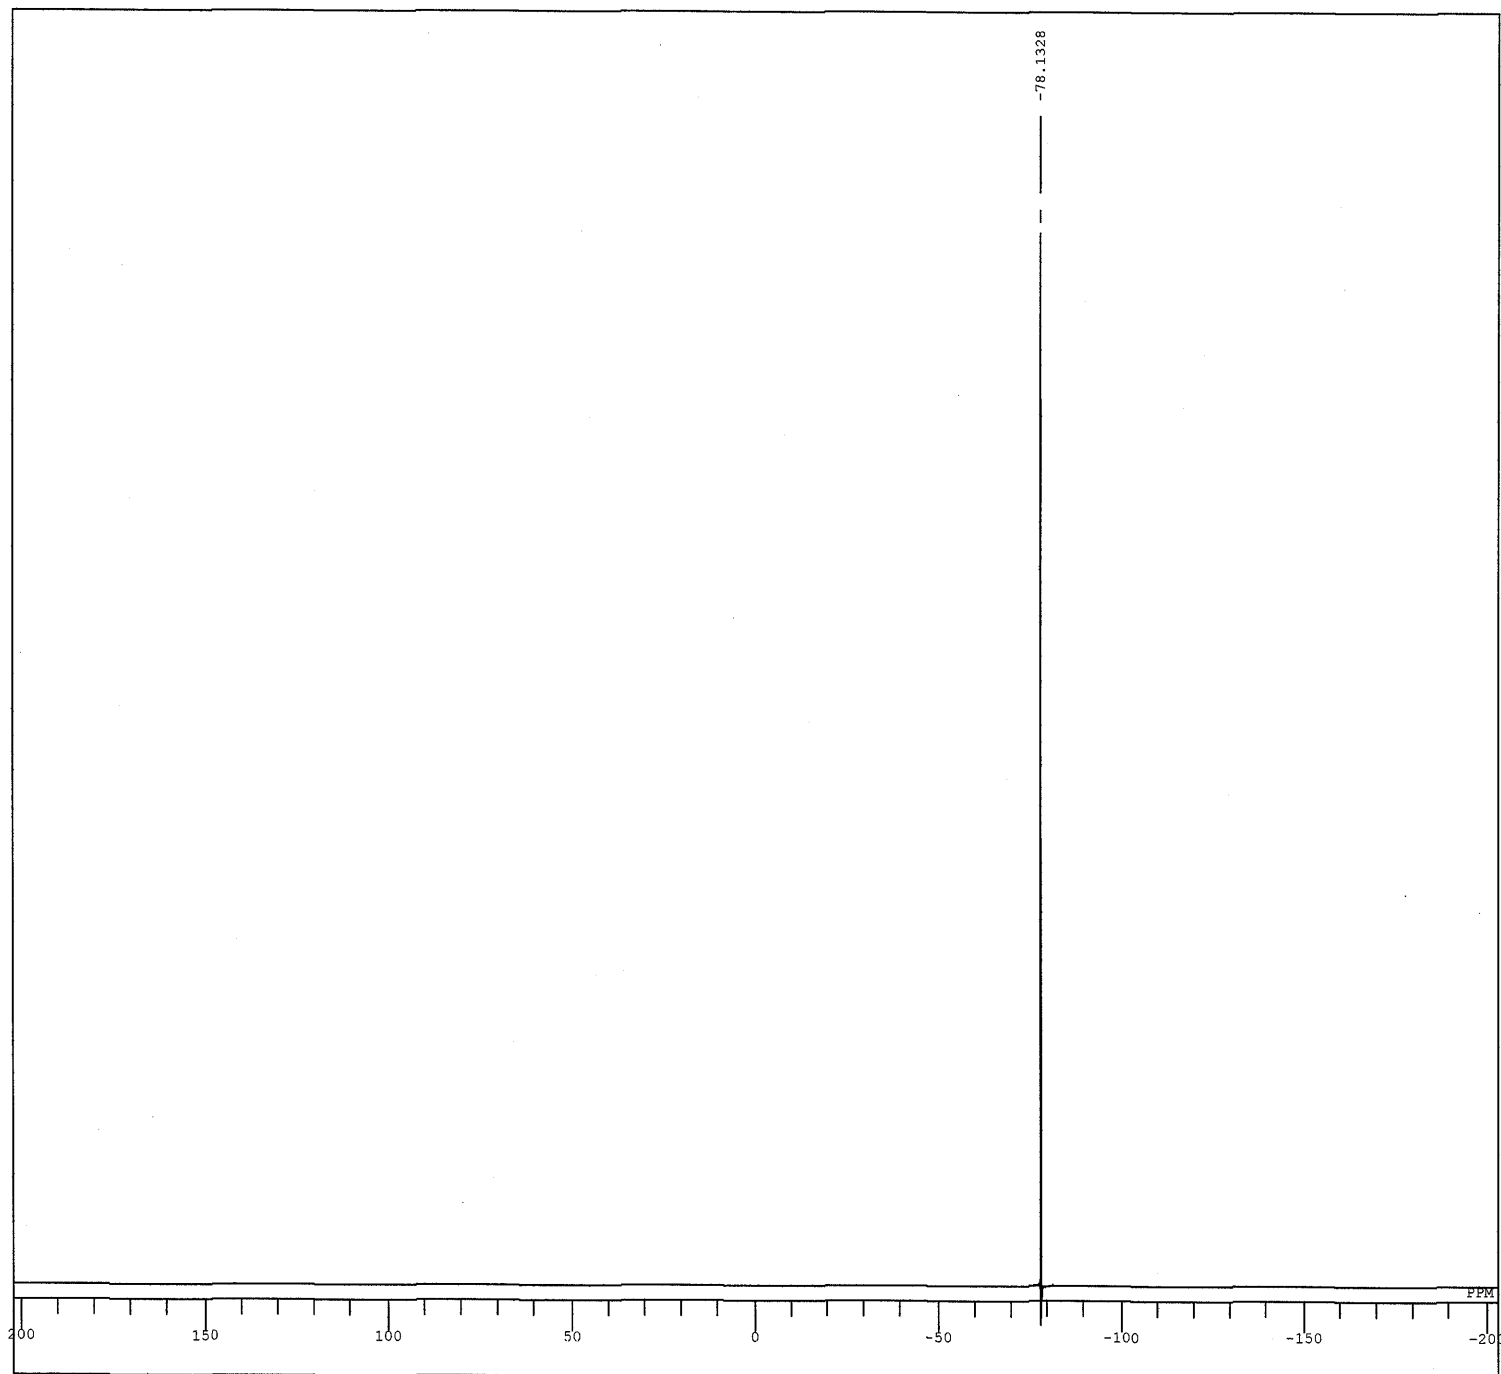

DFILE ozawa04-122\_1\_C\_19F.jdf  
COMNT OAc, Bn  
DATIM 02-02-2014 14:37:26  
OBNUC 19F  
EXMOD proton.jxp  
OBFREQ 368.64 MHz  
OBSETE 7.63 KHz  
OBFIN 2.85 Hz  
POINT 16384  
FREQU 186567.17 Hz  
SCANS 4  
ACQTM 0.0878 sec  
PD 5.0000 sec  
PWL 3.90 usec  
IRNUC 19F  
CTEMP 21.0 c  
SLVNT CDCL3  
EXREF -164.90 ppm  
BF 0.12 Hz  
RGAIN 46

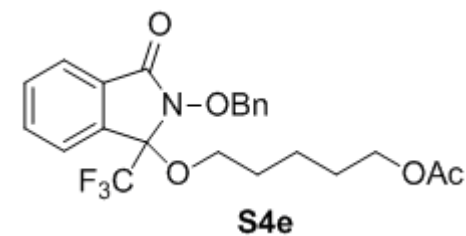



OAc, OH

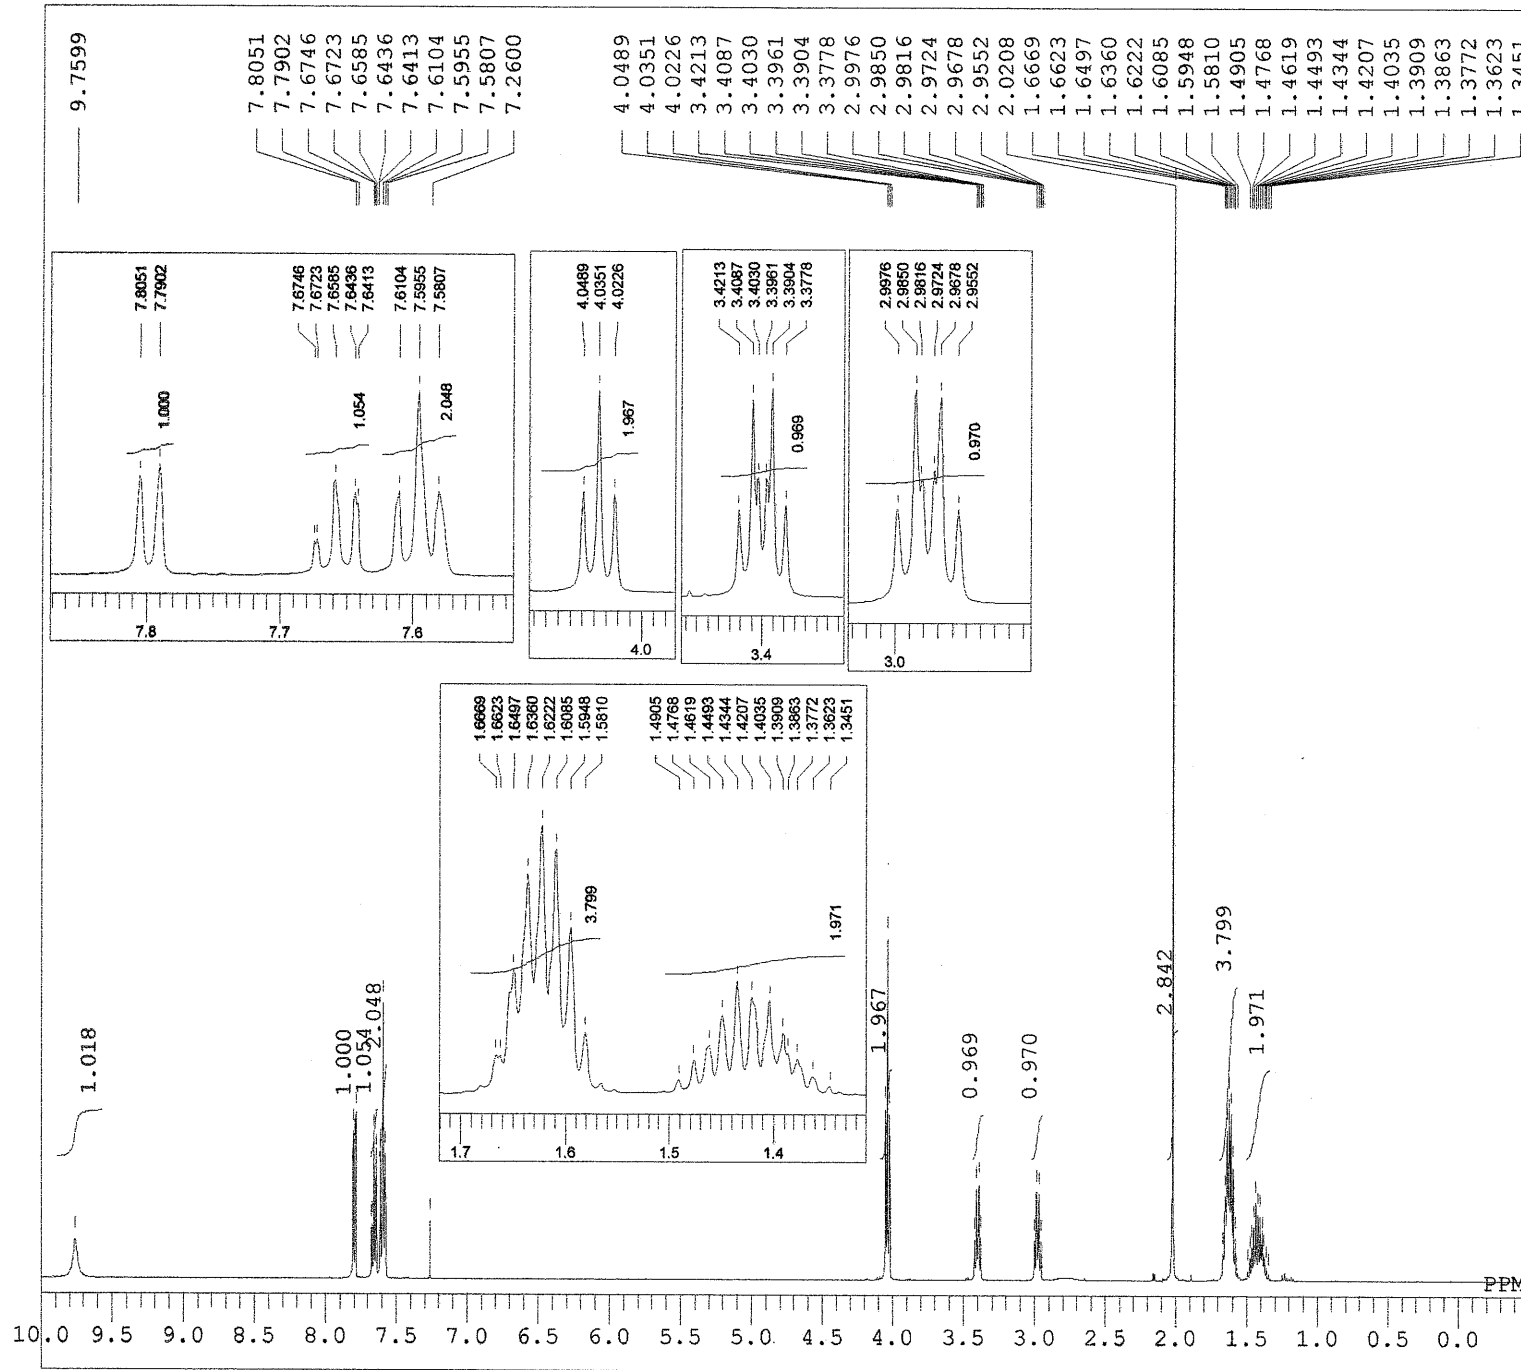

DFILE ozawa04-024\_1H.jdf  
COMNT OAc, OH  
DATIM 2014-02-01 21:14:19  
OBNUC 1H  
EXMOD proton.jxp  
OBFRQ 500.16 MHz  
OBSET 2.41 KHz  
OBFIN 6.01 Hz  
POINT 16384  
FREQU 9384.38 Hz  
SCANS 4  
ACQTM 1.7459 sec  
PD 5.0000 sec  
PW1 5.55 usec  
IRNUC 1H  
CTEMP 21.2 c  
SLVNT CDCL3  
EXREF 7.26 ppm  
BF 0.12 Hz  
RGAIN 28

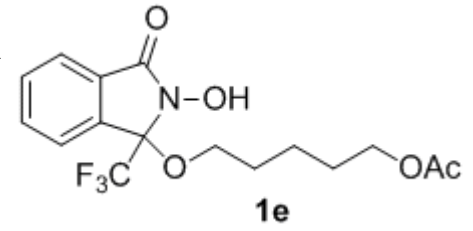

OAc, OH

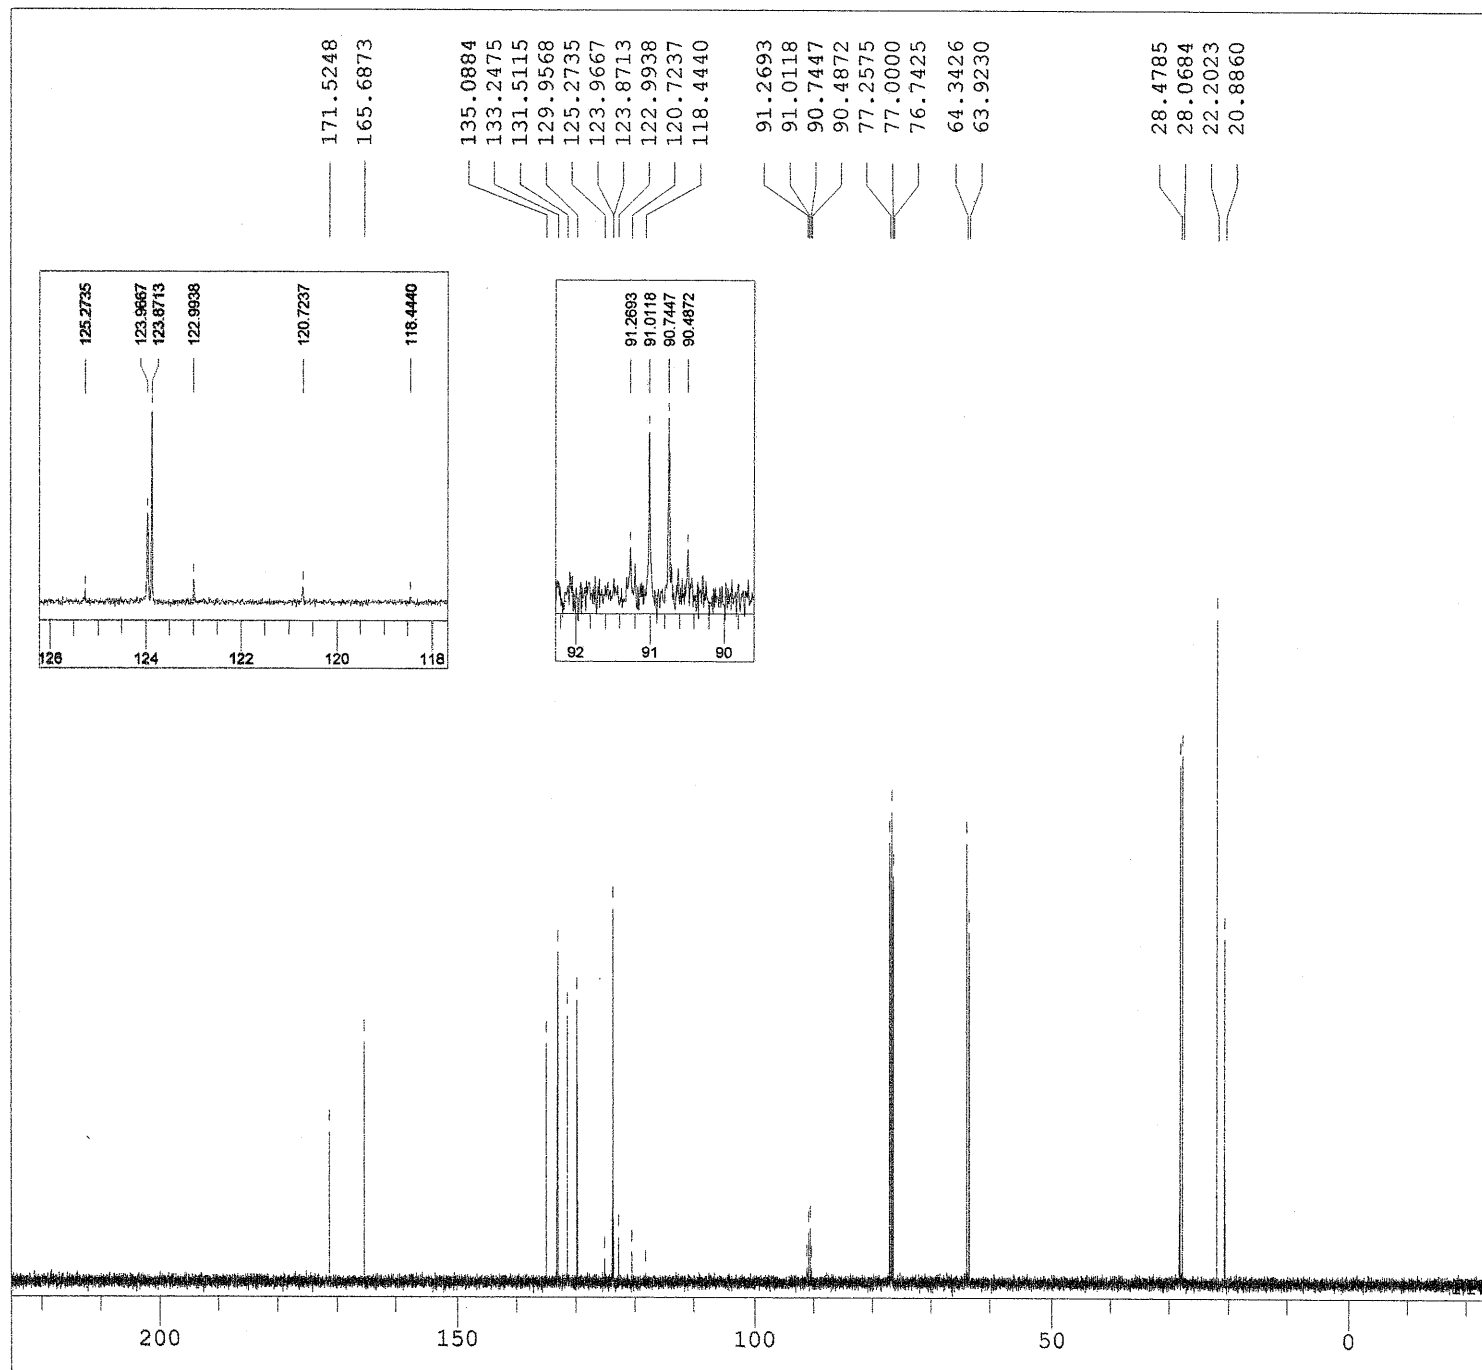

DFILE ozawa04-024\_13C.jdf  
COMNT OAc, OH  
DATIM 2014-02-01 21:15:23  
OBNUC 13C  
EXMOD carbon.jxp  
OBFRQ 125.77 MHz  
OBSET 7.87 KHz  
OBFIN 4.21 Hz  
POINT 32767  
FREQU 39308.18 Hz  
SCANS 112  
ACQTM 0.8336 sec  
PD 3.0000 sec  
PW1 3.40 usec  
IRNUC 1H  
CTEMP 21.9 c  
SLVNT CDCL3  
EXREF 77.00 ppm  
BF 0.12 Hz  
RGAIN 60

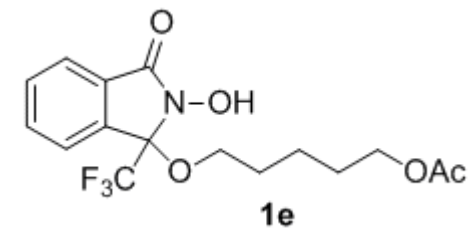

OAc, OH

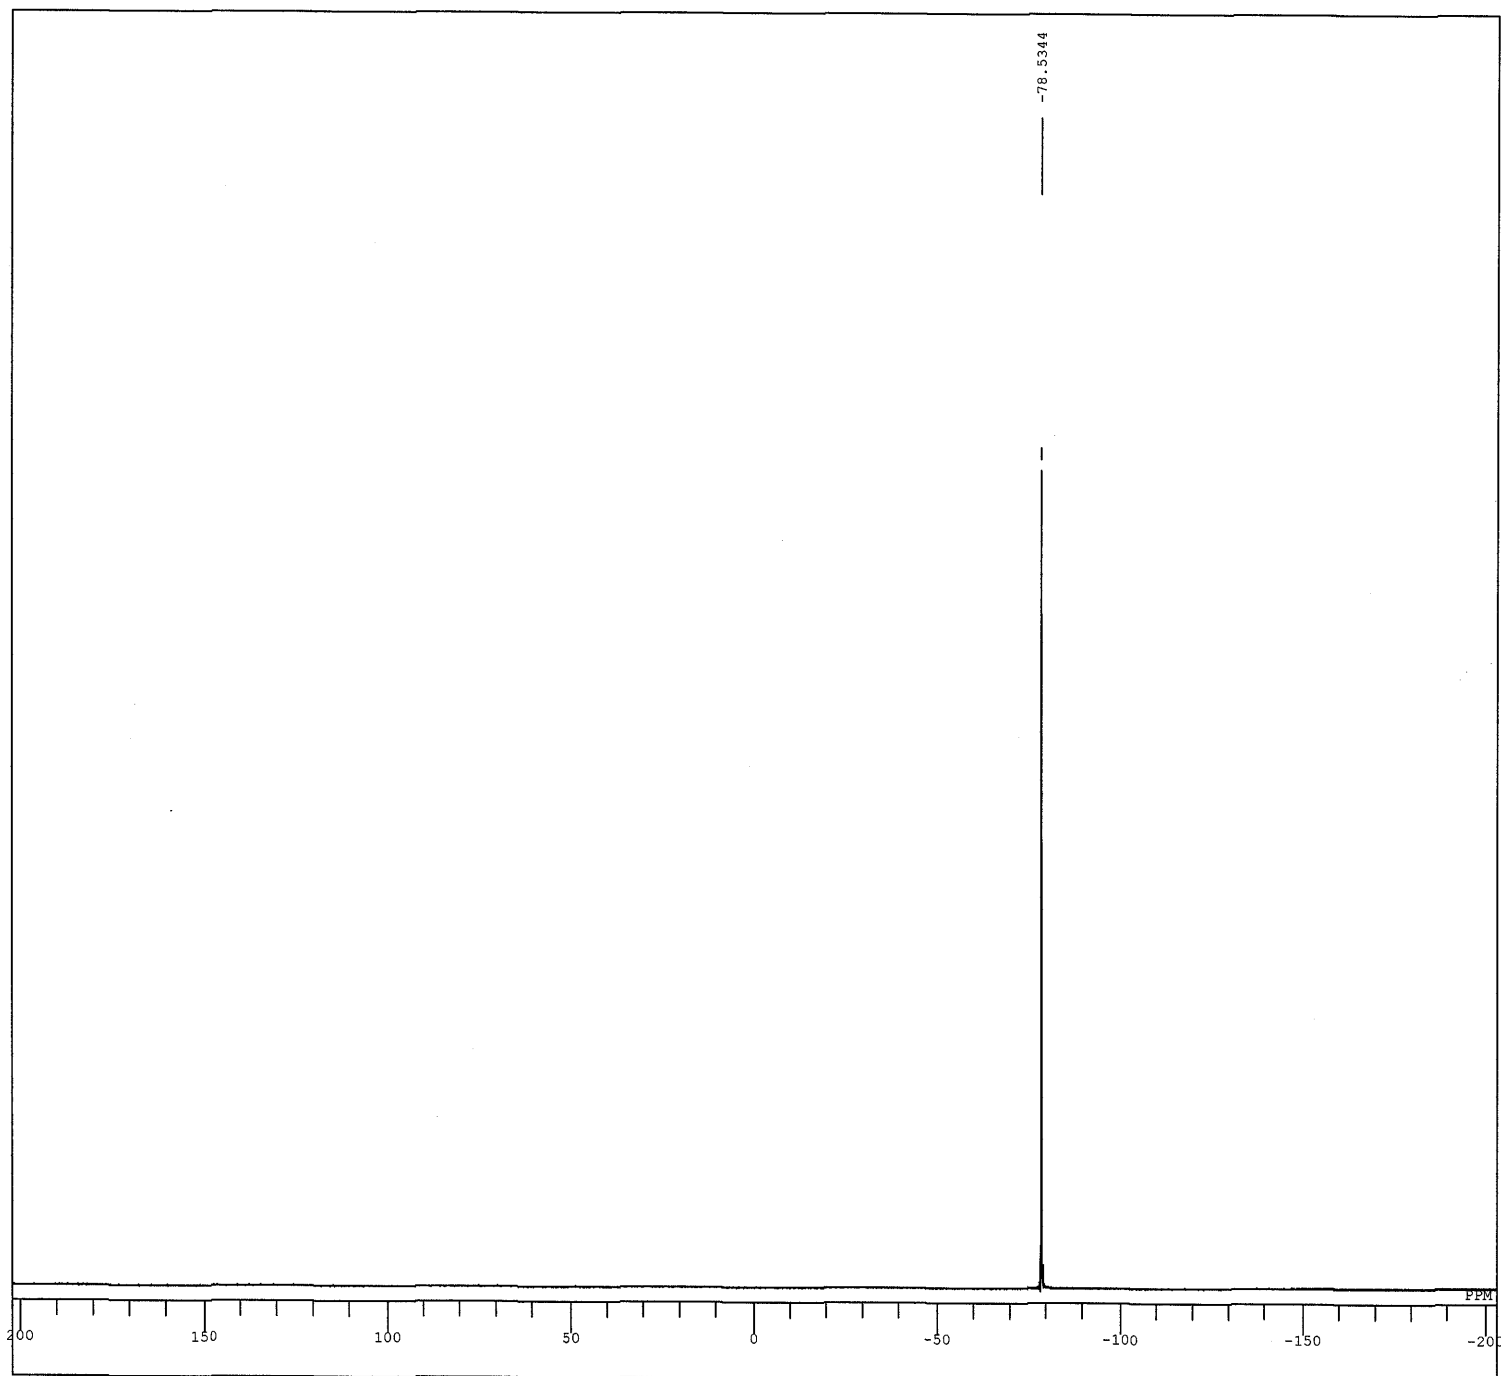

DFILE ozawa04-024\_19F.jdf  
COMNT OAc, OH  
DATIM 01-02-2014 21:41:09  
OBNUC 19F  
EXMOD proton.jxp  
OBFREQ 368.64 MHz  
OBSETE 7.63 KHz  
OBFIN 2.85 Hz  
POINT 16384  
FREQU 186567.17 Hz  
SCANS 4  
ACQTM 0.0878 sec  
PD 5.0000 sec  
PW1 3.90 usec  
IRNUC 19F  
CTEMP 21.2 c  
SLVNT CDCL3  
EXREF -164.90 ppm  
BF 0.12 Hz  
RGAIN 44

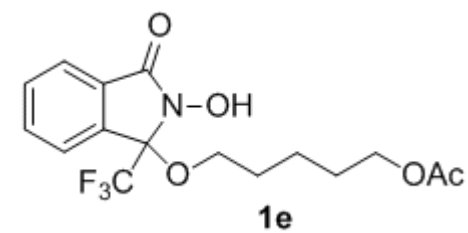

OAc, [O]

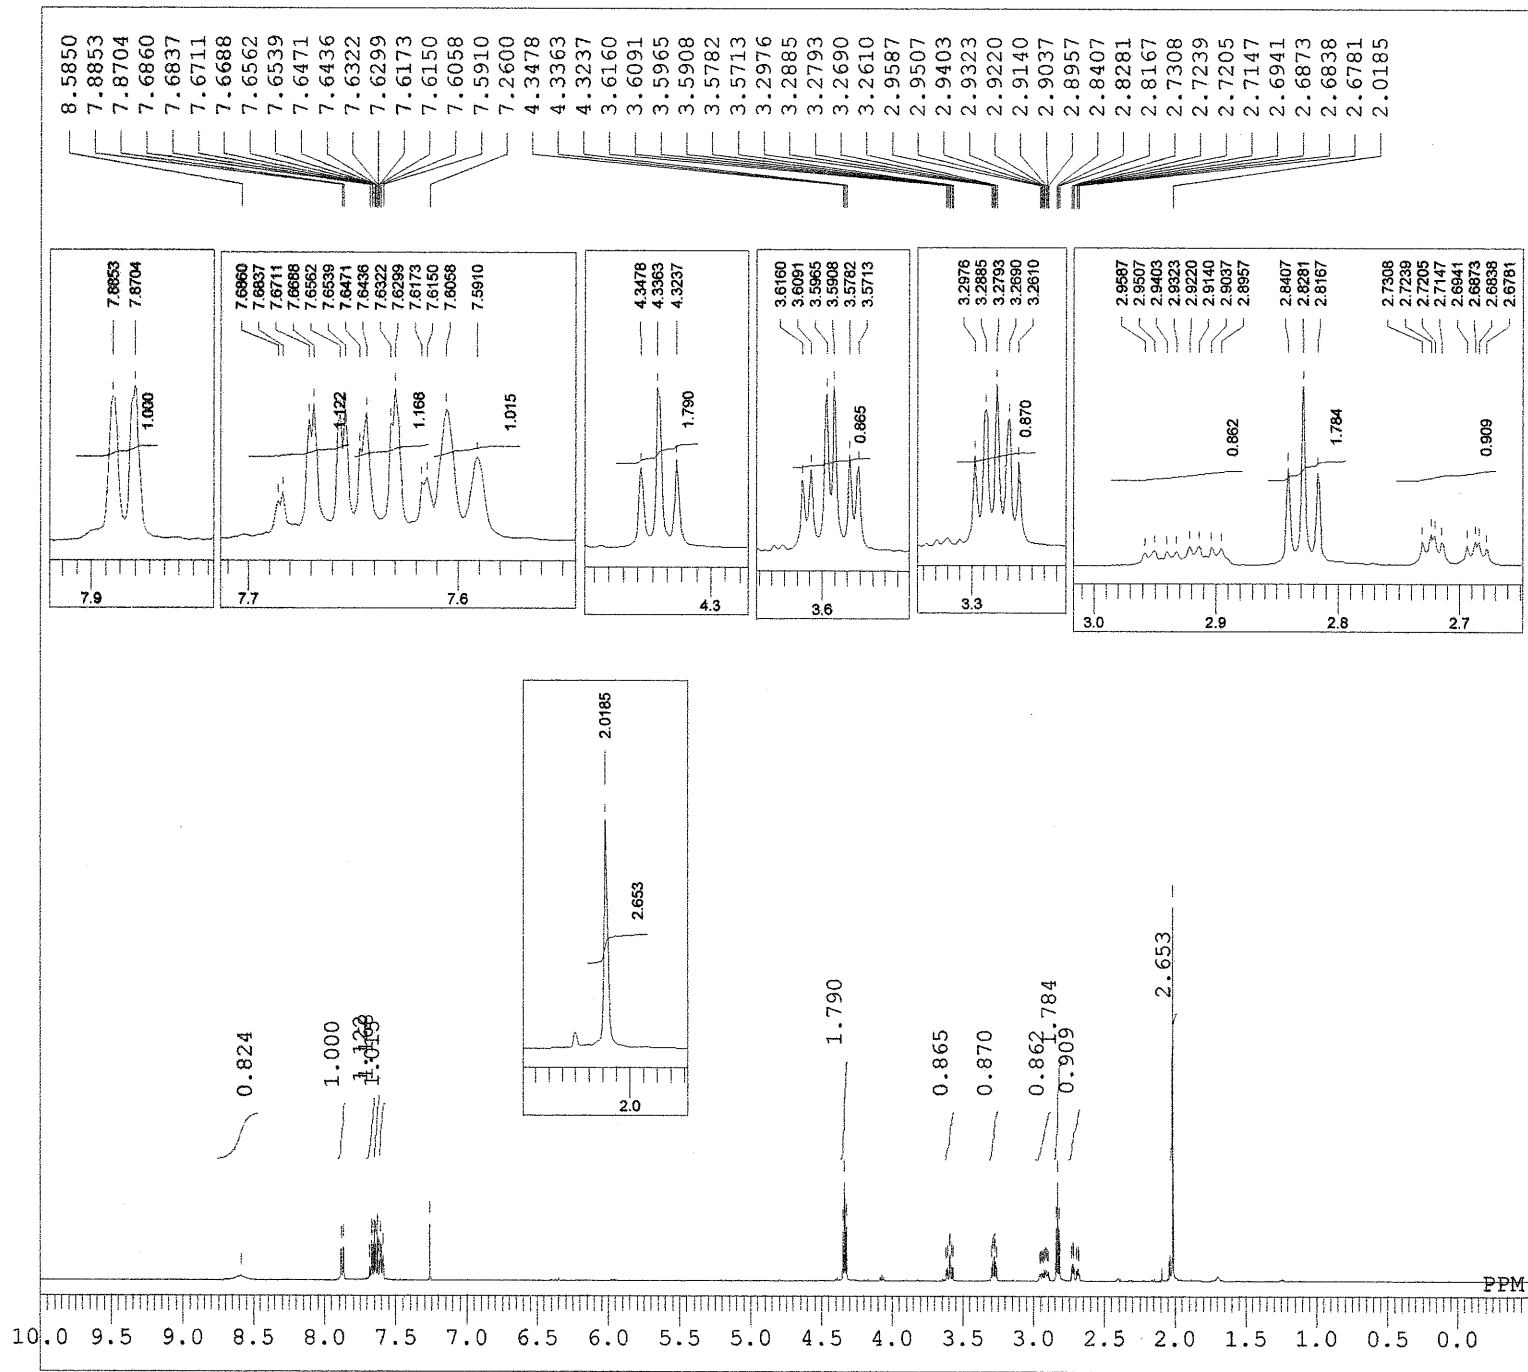

DFILE ozawa04-121\_1H.jdf  
 COMNT OAc, [O]  
 DATIM 2014-02-05 20:43:59  
 OBNUC 1H  
 EXMOD proton.jxp  
 OBFRQ 500.16 MHz  
 OBSET 2.41 KHz  
 OBFIN 6.01 Hz  
 POINT 16384  
 FREQU 9384.38 Hz  
 SCANS 4  
 ACQTM 1.7459 sec  
 PD 5.0000 sec  
 PW1 5.55 usec  
 IRNUC 1H  
 CTEMP 22.1 c  
 SLVNT CDCL3  
 EXREF 7.26 ppm  
 BF 0.12 Hz  
 RGAIN 36

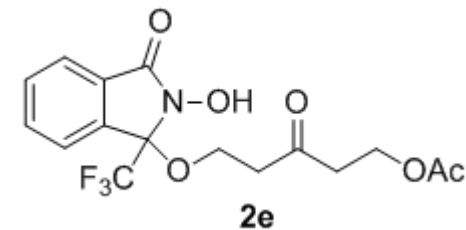

OAc, [O]

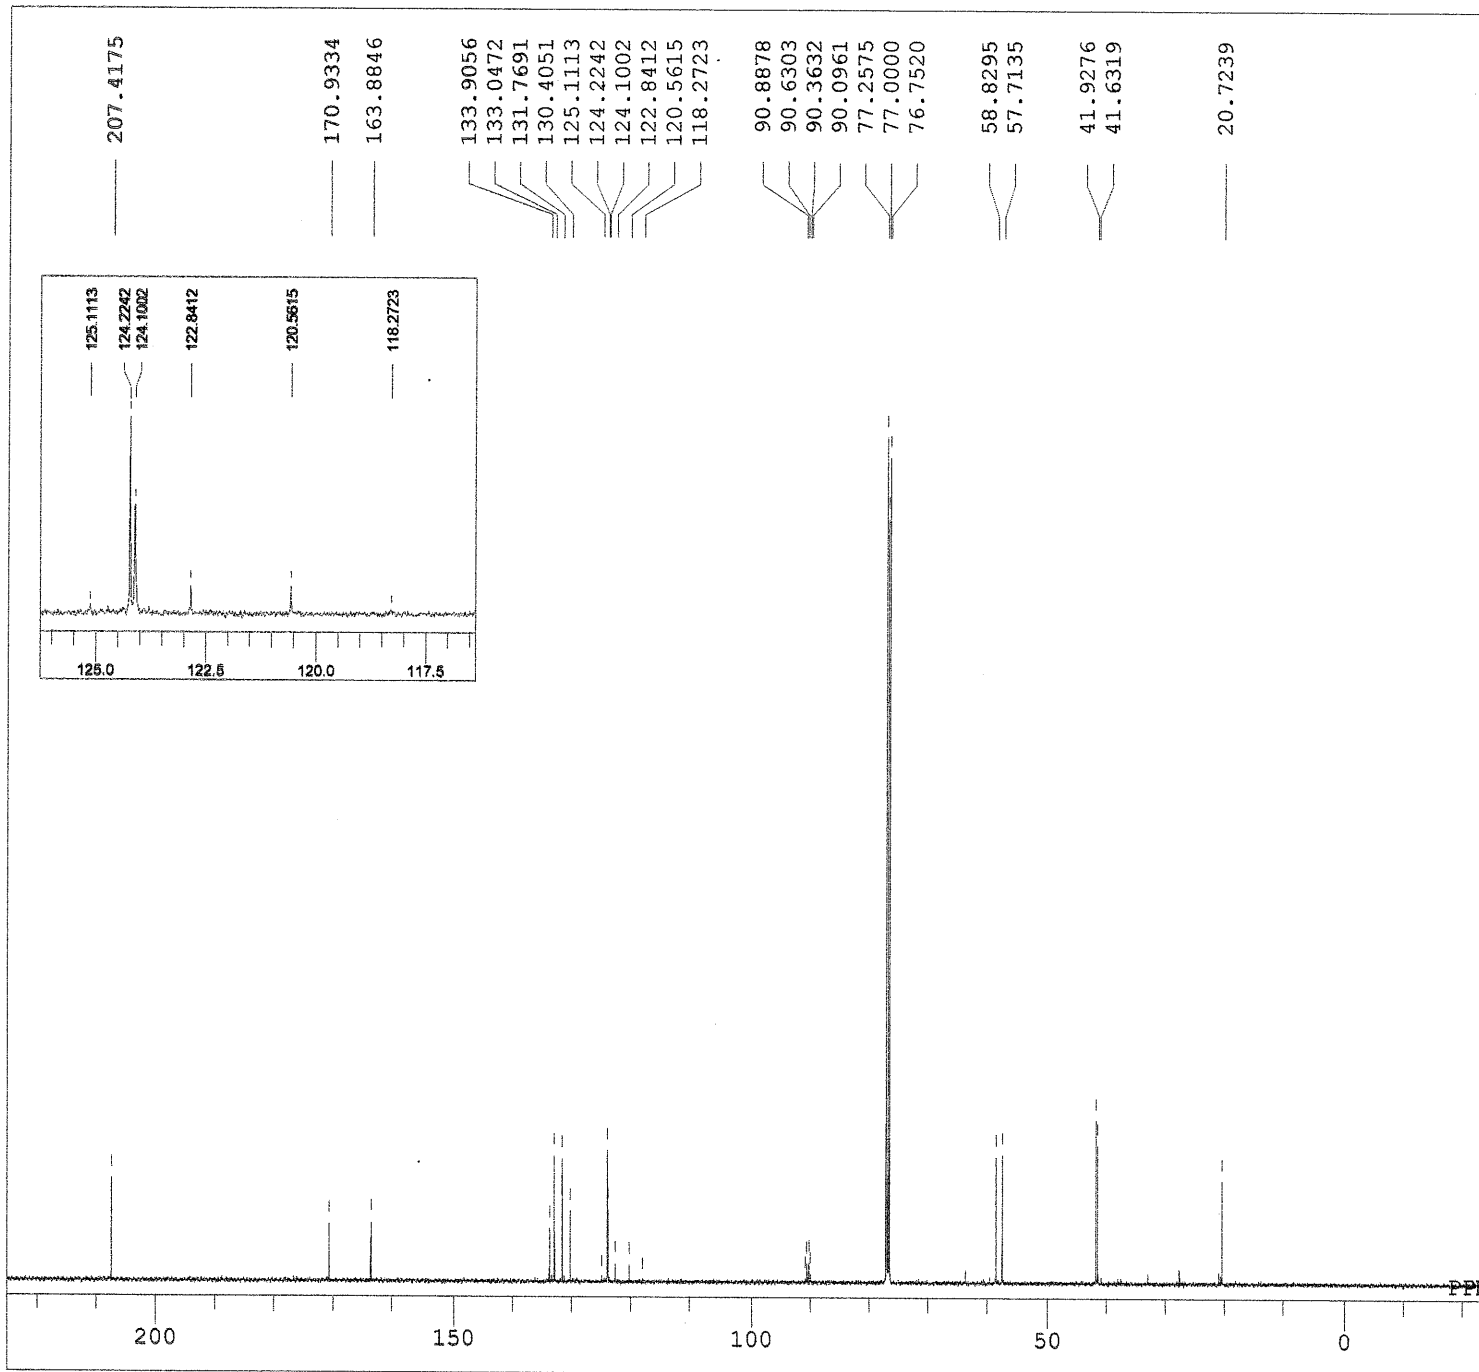

DFILE 2i\_ozawa04-121\_13C.als  
COMNT OAc, [O]  
DATIM 2014-02-09 10:14:17  
OBNUC 13C  
EXMOD carbon.jxp  
OBFRQ 125.77 MHz  
OBSET 7.87 KHz  
OBFIN 4.21 Hz  
POINT 32767  
FREQU 39308.18 Hz  
SCANS 2116  
ACQTM 0.8336 sec  
PD 3.0000 sec  
PW1 3.40 usec  
IRNUC 1H  
CTEMP 21.4 c  
SLVNT CDCL3  
EXREF 77.00 ppm  
BF 1.00 Hz  
RGAIN 60

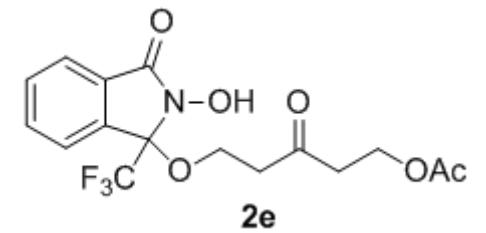

OAc, [0]

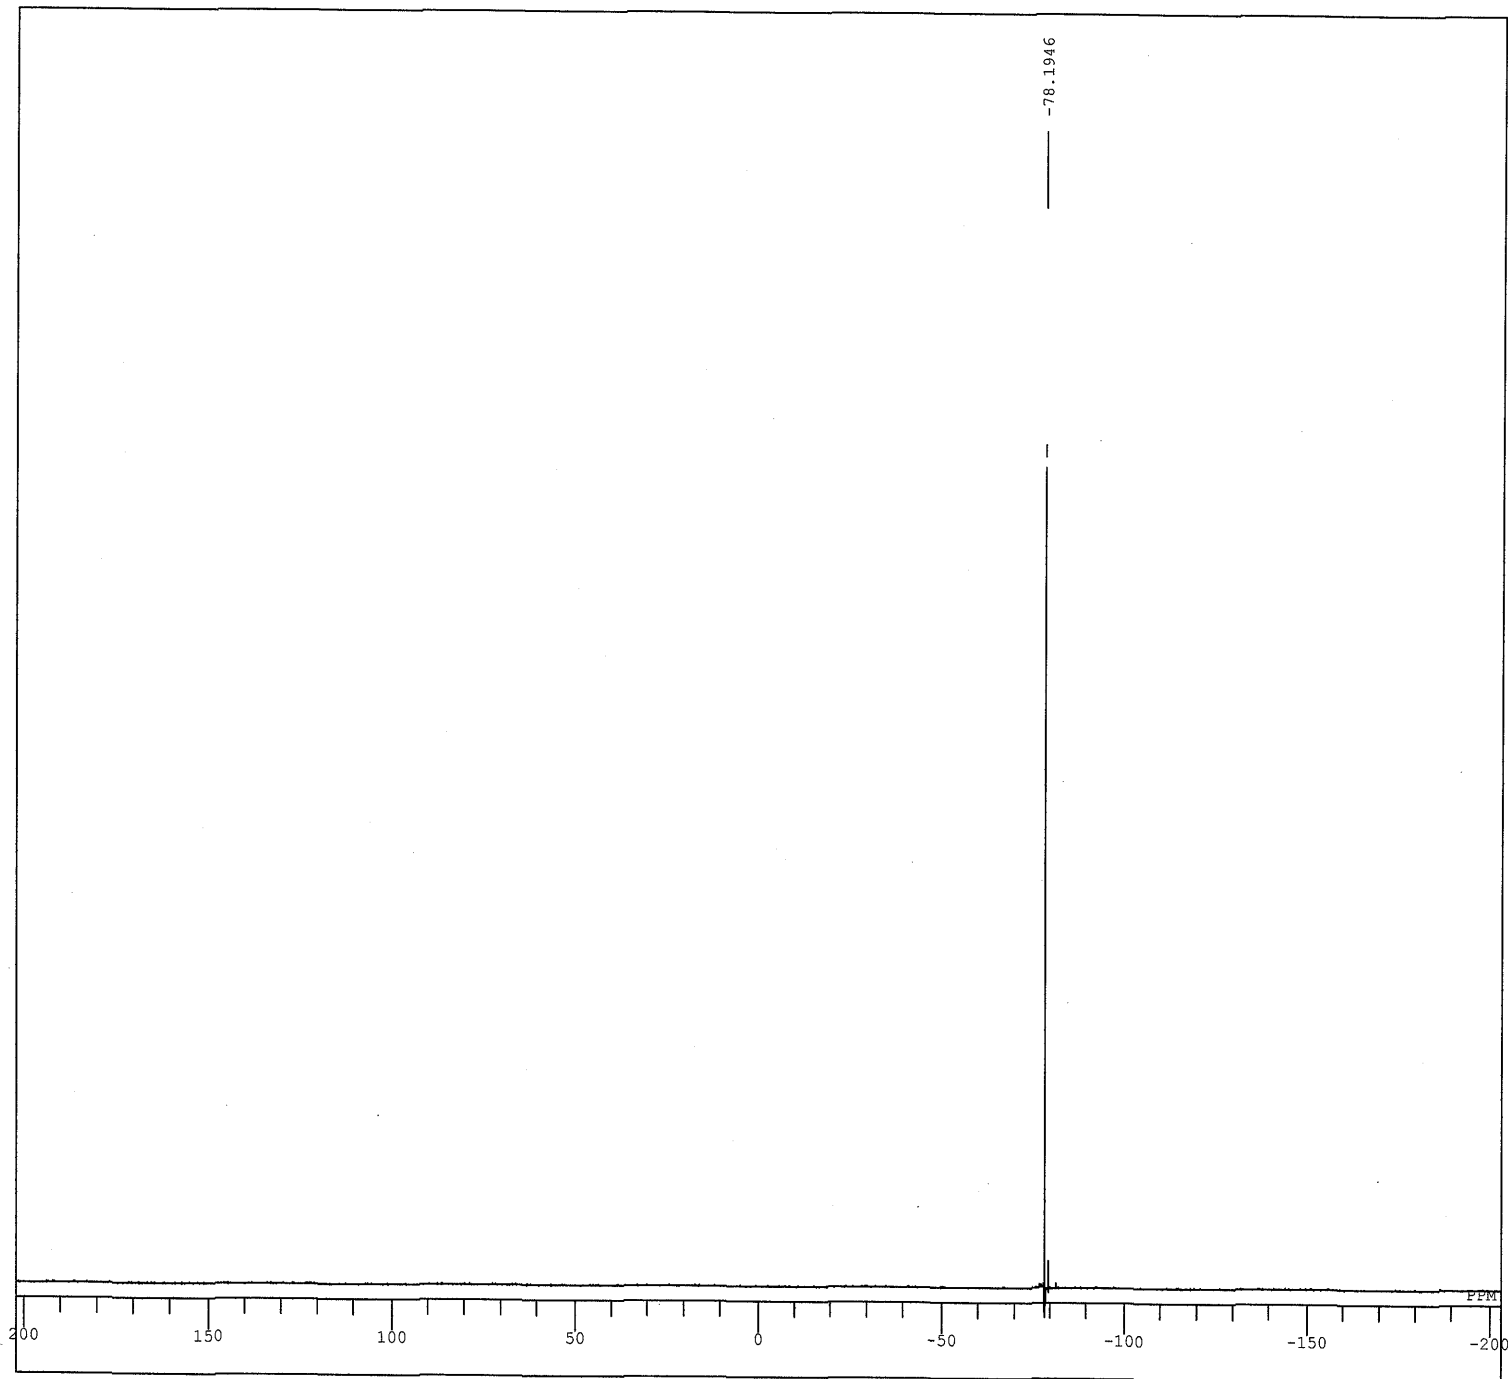

DFILE ozawa04-121\_19F.jdf  
COMNT OAc, [0]  
DATIM 09-02-2014 12:54:25  
OBNUC 19F  
EXMOD proton.jxp  
OBFRQ 368.64 MHz  
OBSET 7.63 KHz  
OBFIN 2.85 Hz  
POINT 16384  
FREQU 186567.17 Hz  
SCANS 4  
ACQTM 0.0878 sec  
PD 5.0000 sec  
PWL 3.90 usec  
IRNUC 19F  
CTEMP 20.9 c  
SLVNT CDCL3  
EXREF -164.90 ppm  
BF 0.05 Hz  
RGAIN 48

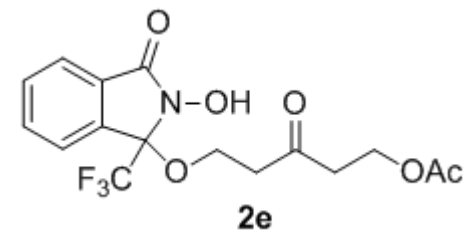

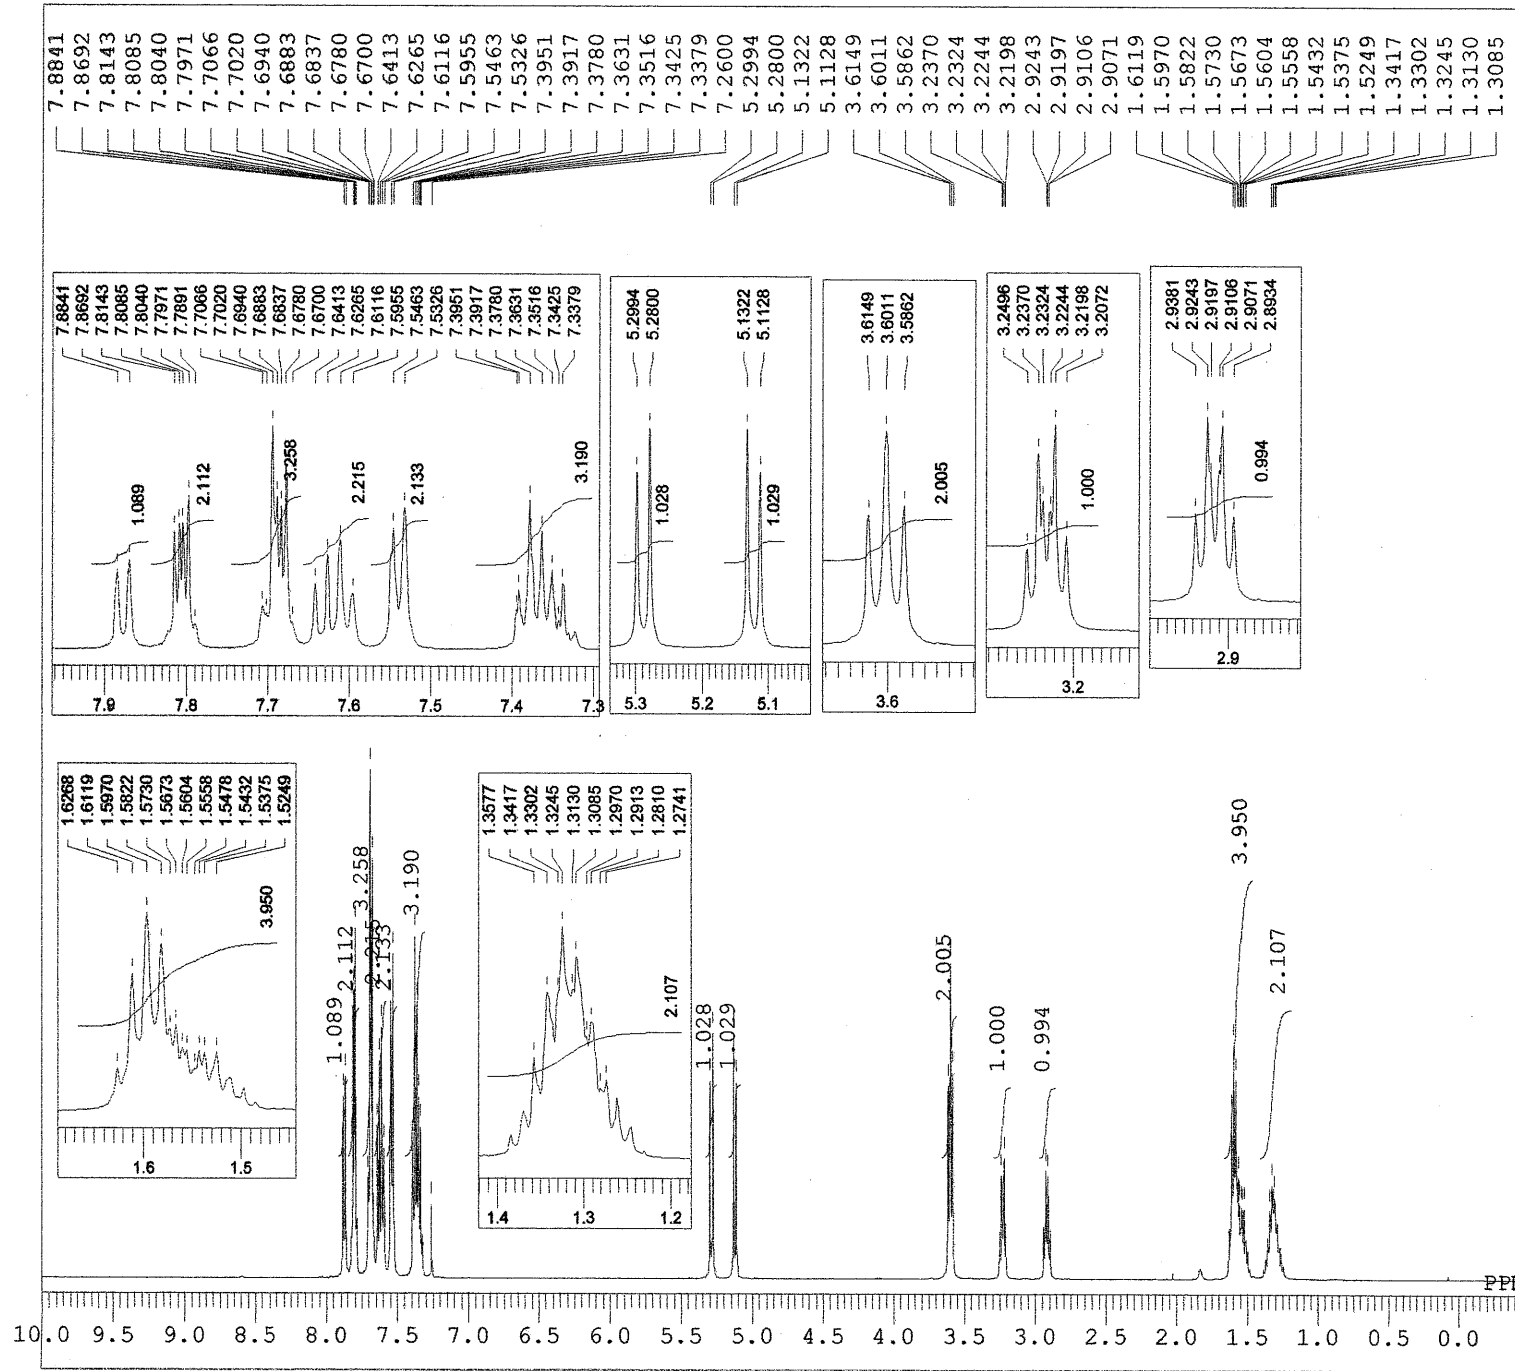

DFILE ozawa04-142\_2\_1H.jdf  
 COMNT C5-NPhth, Bn  
 DATIM 2014-03-06 19:38:37  
 OBNUC 1H  
 EXMOD proton.jxp  
 OBFRQ 500.16 MHz  
 OBSET 2.41 KHz  
 OBFIN 6.01 Hz  
 POINT 16384  
 FREQU 9384.38 Hz  
 SCANS 4  
 ACQTM 1.7459 sec  
 PD 5.0000 sec  
 PW1 5.55 usec  
 IRNUC 1H  
 CTEMP 21.6 c  
 SLVNT CDCL3  
 EXREF 7.26 ppm  
 BF 0.12 Hz  
 RGAIN 30

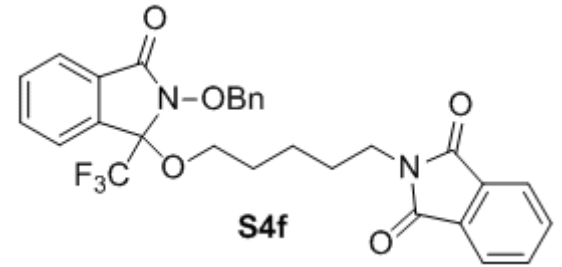

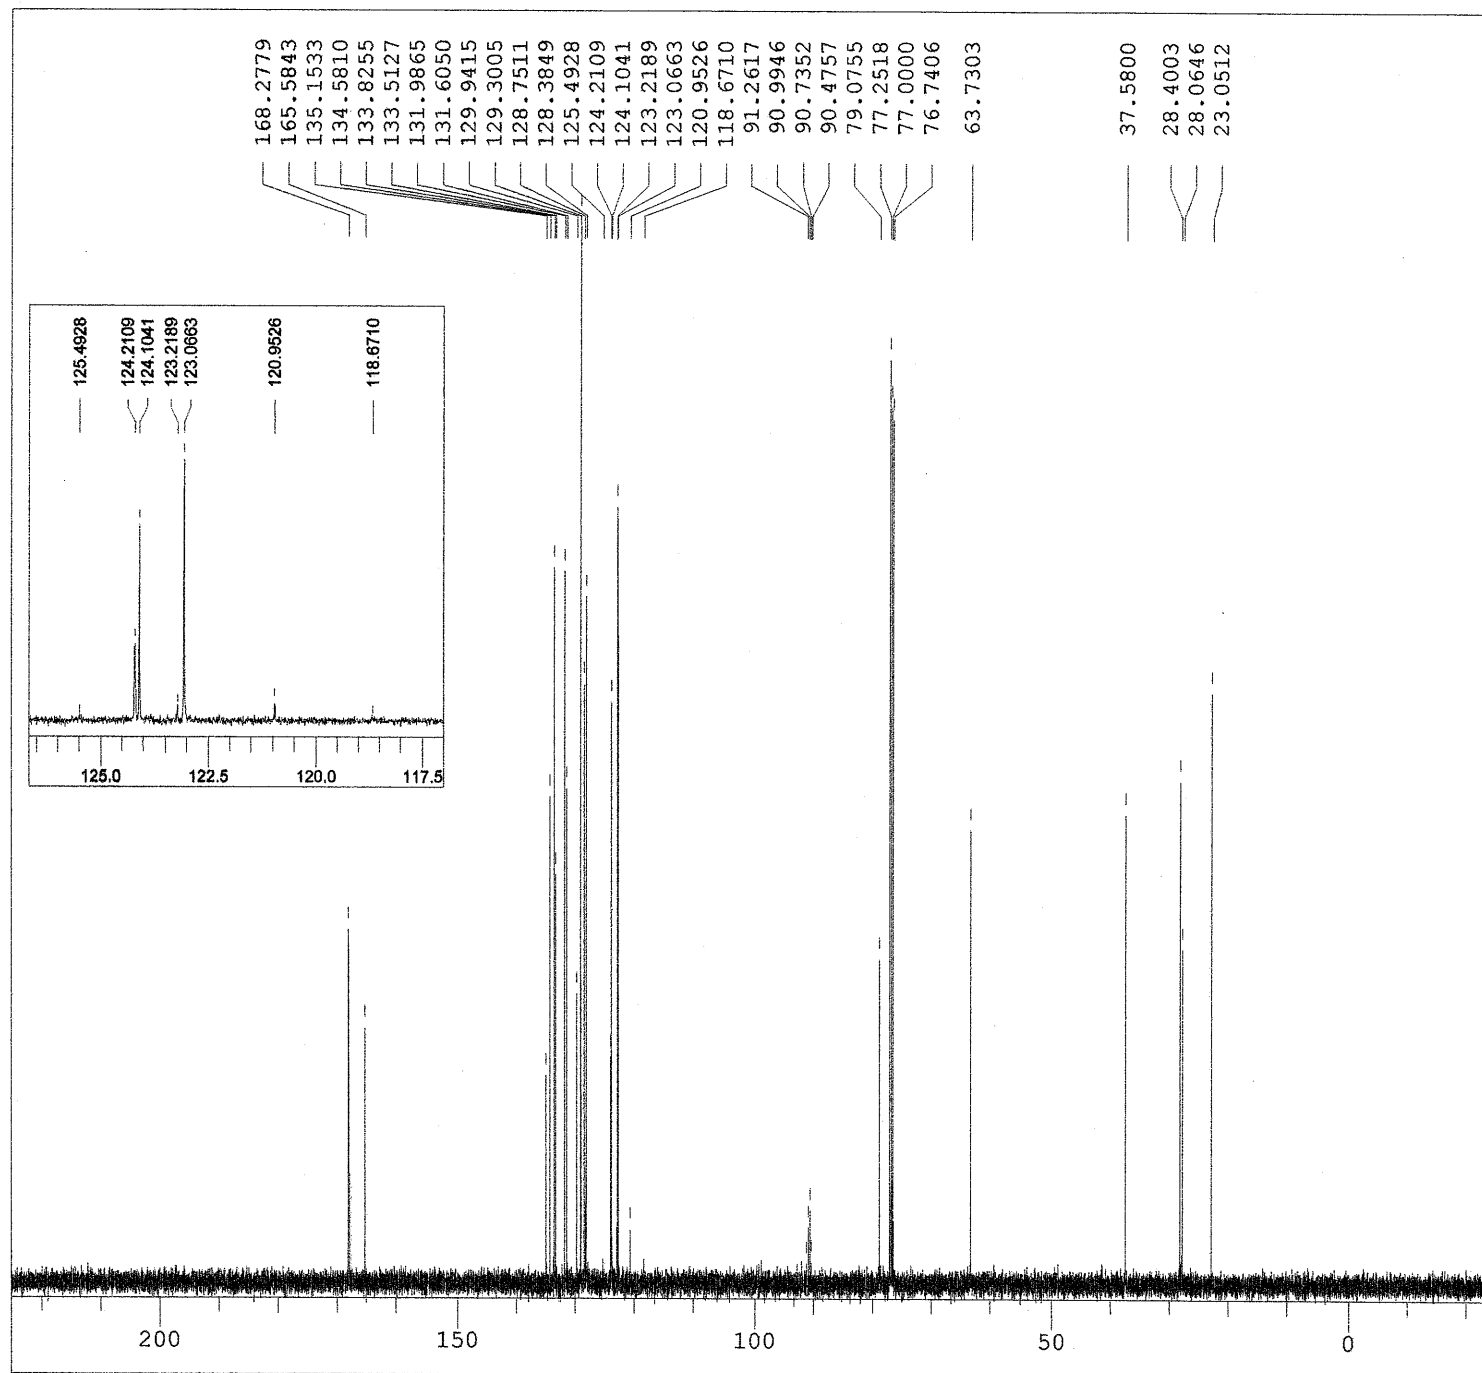

DFILE ozawa04-142\_2\_13C.jdf  
COMNT C5-NPhth, Bn  
DATIM 2014-03-06 19:39:56  
OBNUC 13C  
EXMOD carbon.jxp  
OBFRQ 125.77 MHz  
OBSET 7.87 KHz  
OBFIN 4.21 Hz  
POINT 32768  
FREQU 31446.54 Hz  
SCANS 140  
ACQTM 1.0420 sec  
PD 3.0000 sec  
PW1 3.40 usec  
IRNUC 1H  
CTEMP 22.3 c  
SLVNT CDCL3  
EXREF 77.00 ppm  
BF 0.12 Hz  
RGAIN 72

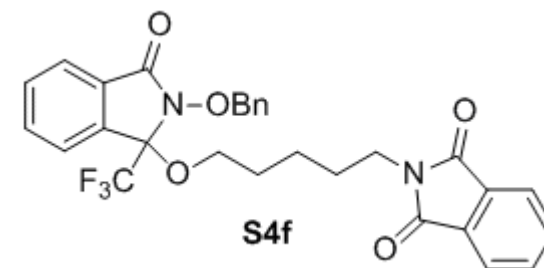



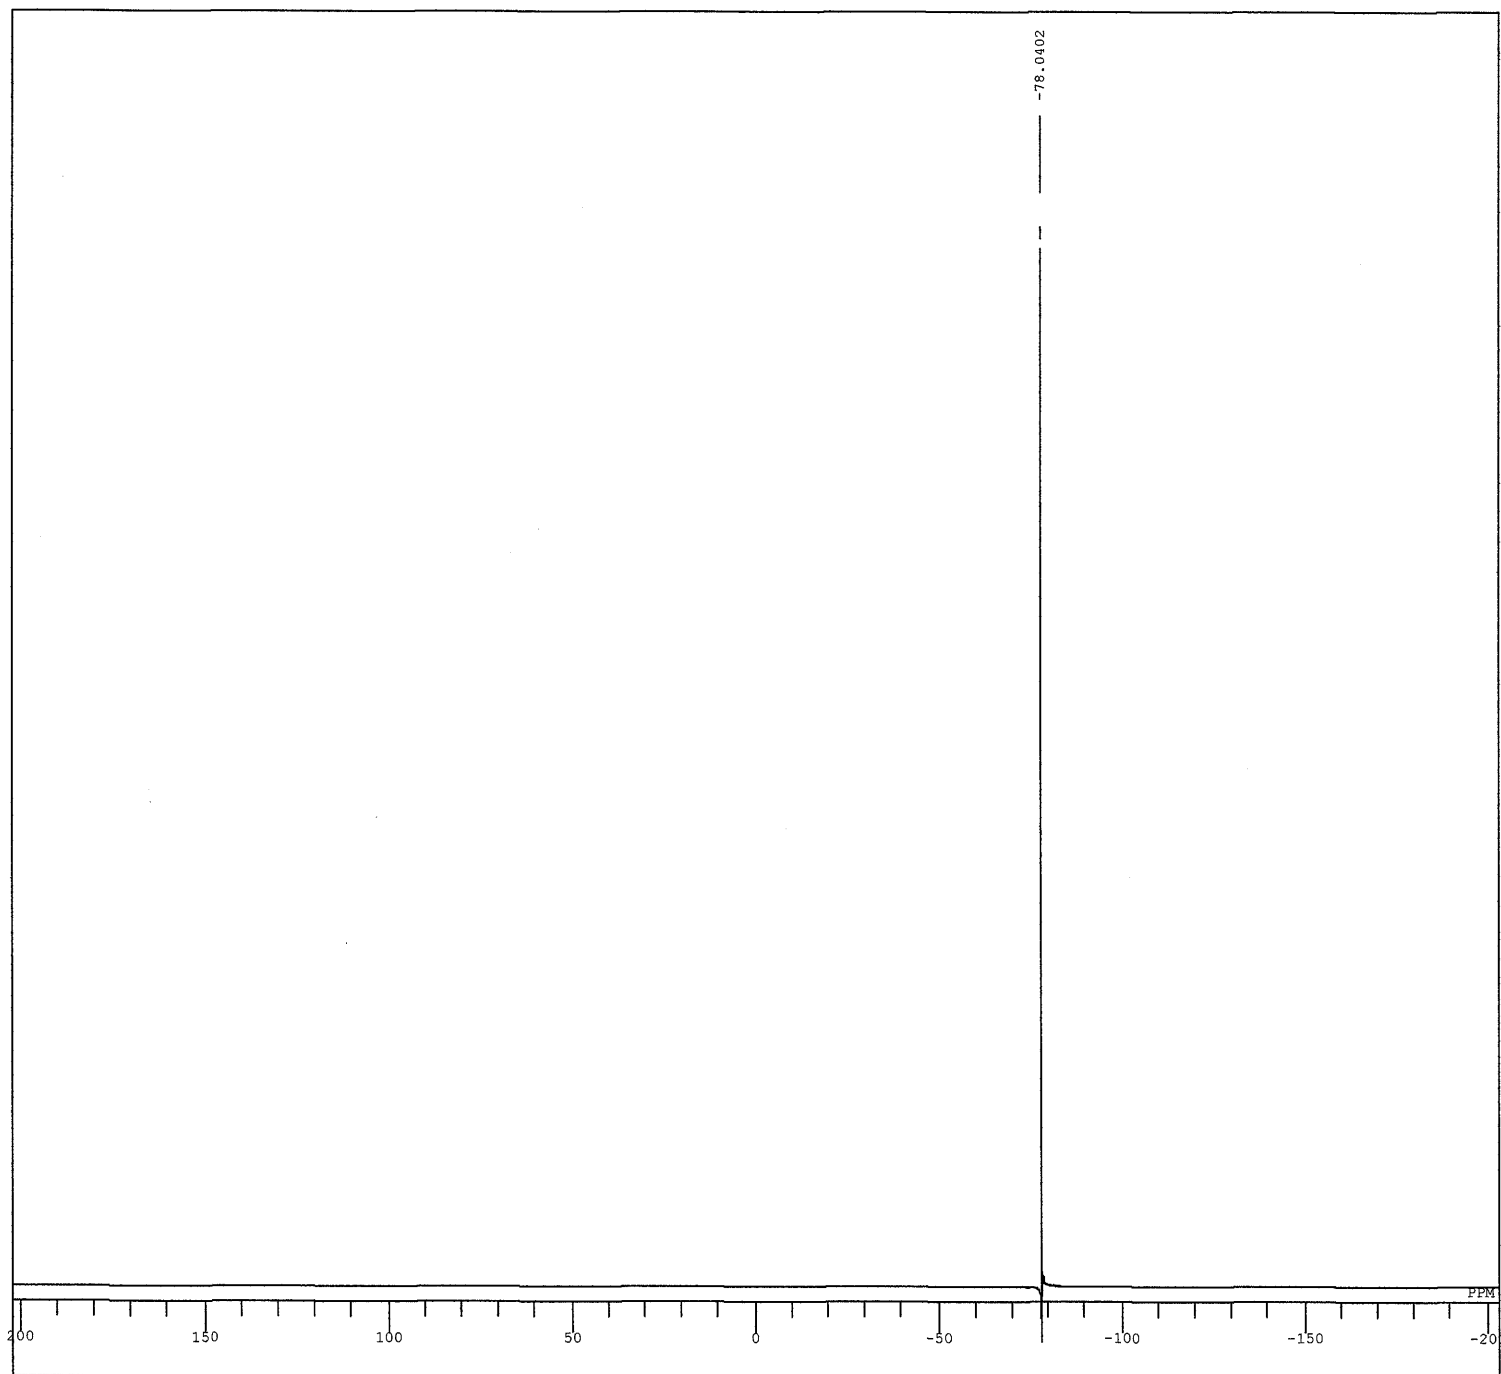

DFILE ozawa04-142\_2\_19F.jdf  
COMNT C5-NPhth, Bn  
DATIM 06-03-2014 20:41:53  
OBNUC 19F  
EXMOD proton.jxp  
OBFRQ 368.64 MHz  
OBSET 7.63 KHz  
OBFIN 2.85 Hz  
POINT 16384  
FREQU 186567.17 Hz  
SCANS 4  
ACQTM 0.0878 sec  
PD 5.0000 sec  
PW1 3.90 usec  
IRNUC 19F  
CTEMP 21.2 c  
SLVNT CDCL3  
EXREF -164.90 ppm  
BF 0.12 Hz  
RGAIN 46

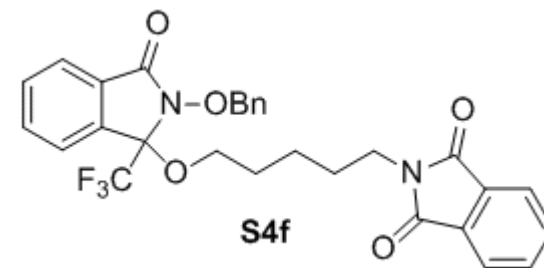

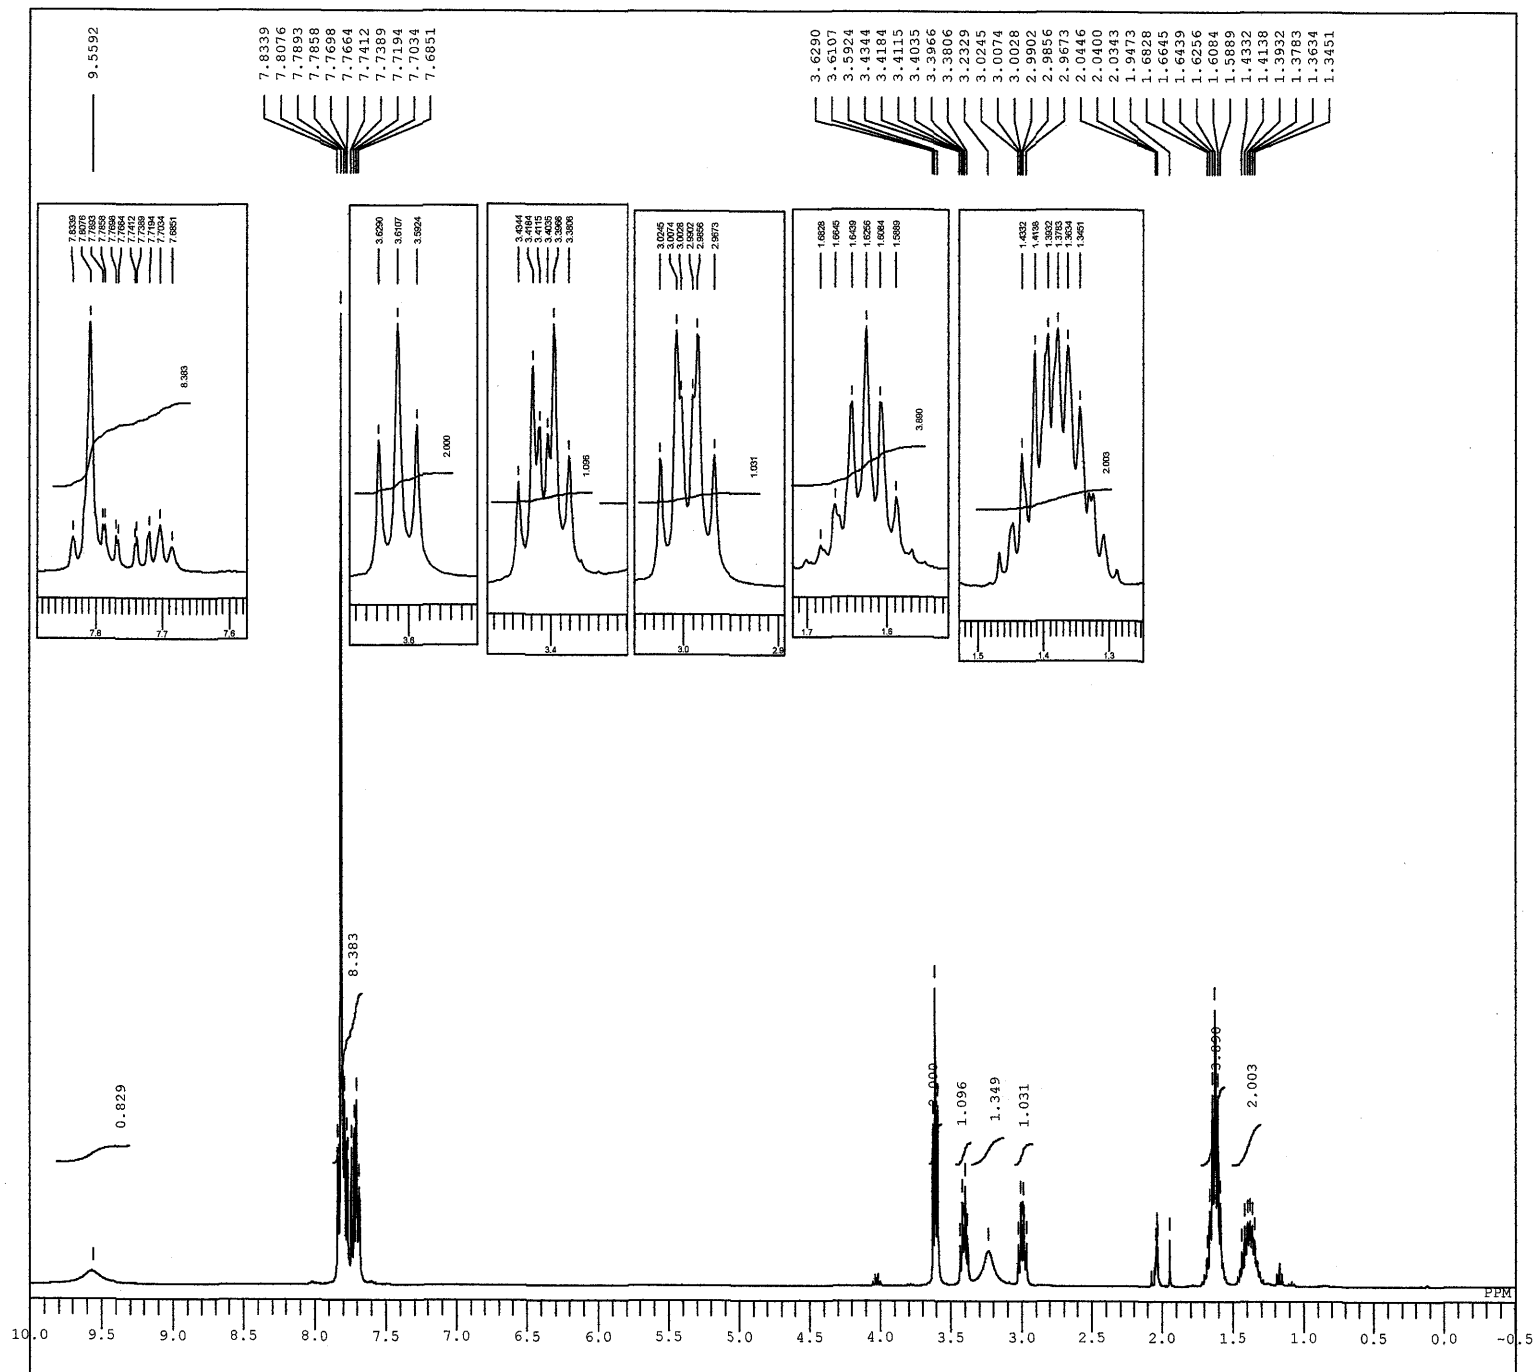

DFILE Ni-C5-NPhth\_1H.jdf  
 COMNT OH  
 DATIM 03-03-2014 21:37:57  
 OBNUC 1H  
 EXMOD proton.jxp  
 OBFRQ 391.78 MHz  
 OBSET 8.51 KHz  
 OBFLN 3.34 Hz  
 POINT 16384  
 FREQU 7348.62 Hz  
 SCANS 4  
 ACQTM 2.2295 sec  
 PD 5.0000 sec  
 FW1 5.25 usec  
 IRNUC 1H  
 CTEMP 20.9 c  
 SLVNT ACETN  
 EXREF 2.04 ppm  
 BF 0.12 Hz  
 RGAIN 22

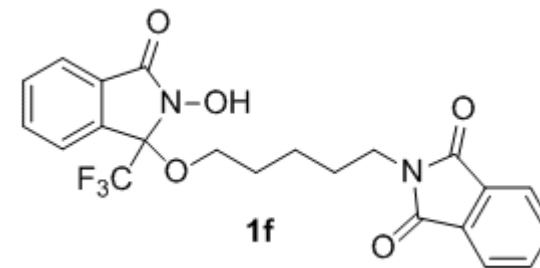

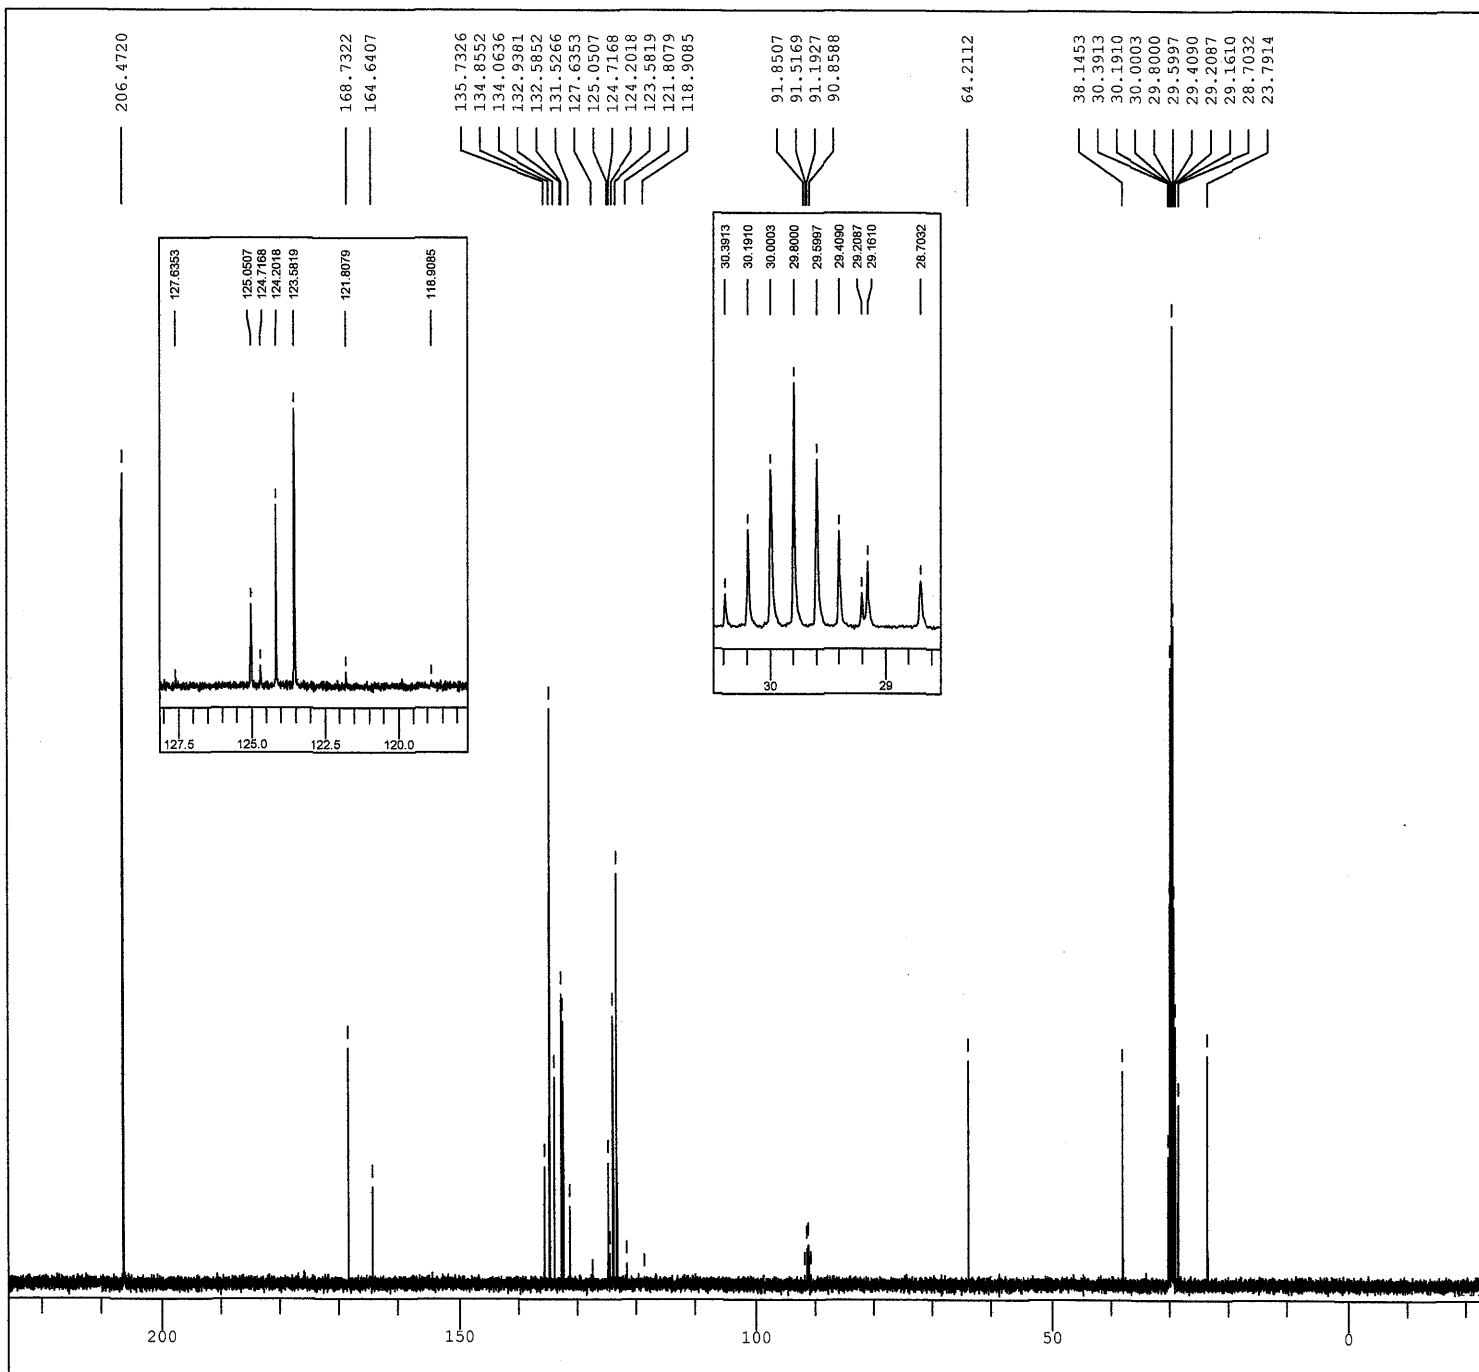

```

DFILE Ni_C5-NPhth_copy1.jdf
COMNT OH
DATIM 03-03-2014 21:53:04
OBNUC 13C
EXMOD carbon.jxp
OBFRQ 98.52 MHz
OBSET 4.64 KHz
OBFIN 8.74 Hz
POINT 32767
FREQU 30788.18 Hz
SCANS 100
ACQTM 0.0000 sec
PD 3.0000 sec
PW1 3.00 usec
IRNUC 1H
CTEMP 21.6 c
SLVNT ACETN
EXREF 29.80 ppm
BF 0.12 Hz
RGAIN 60

```

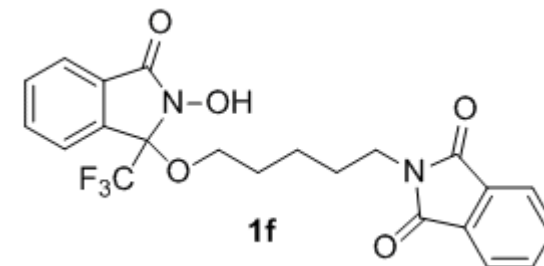



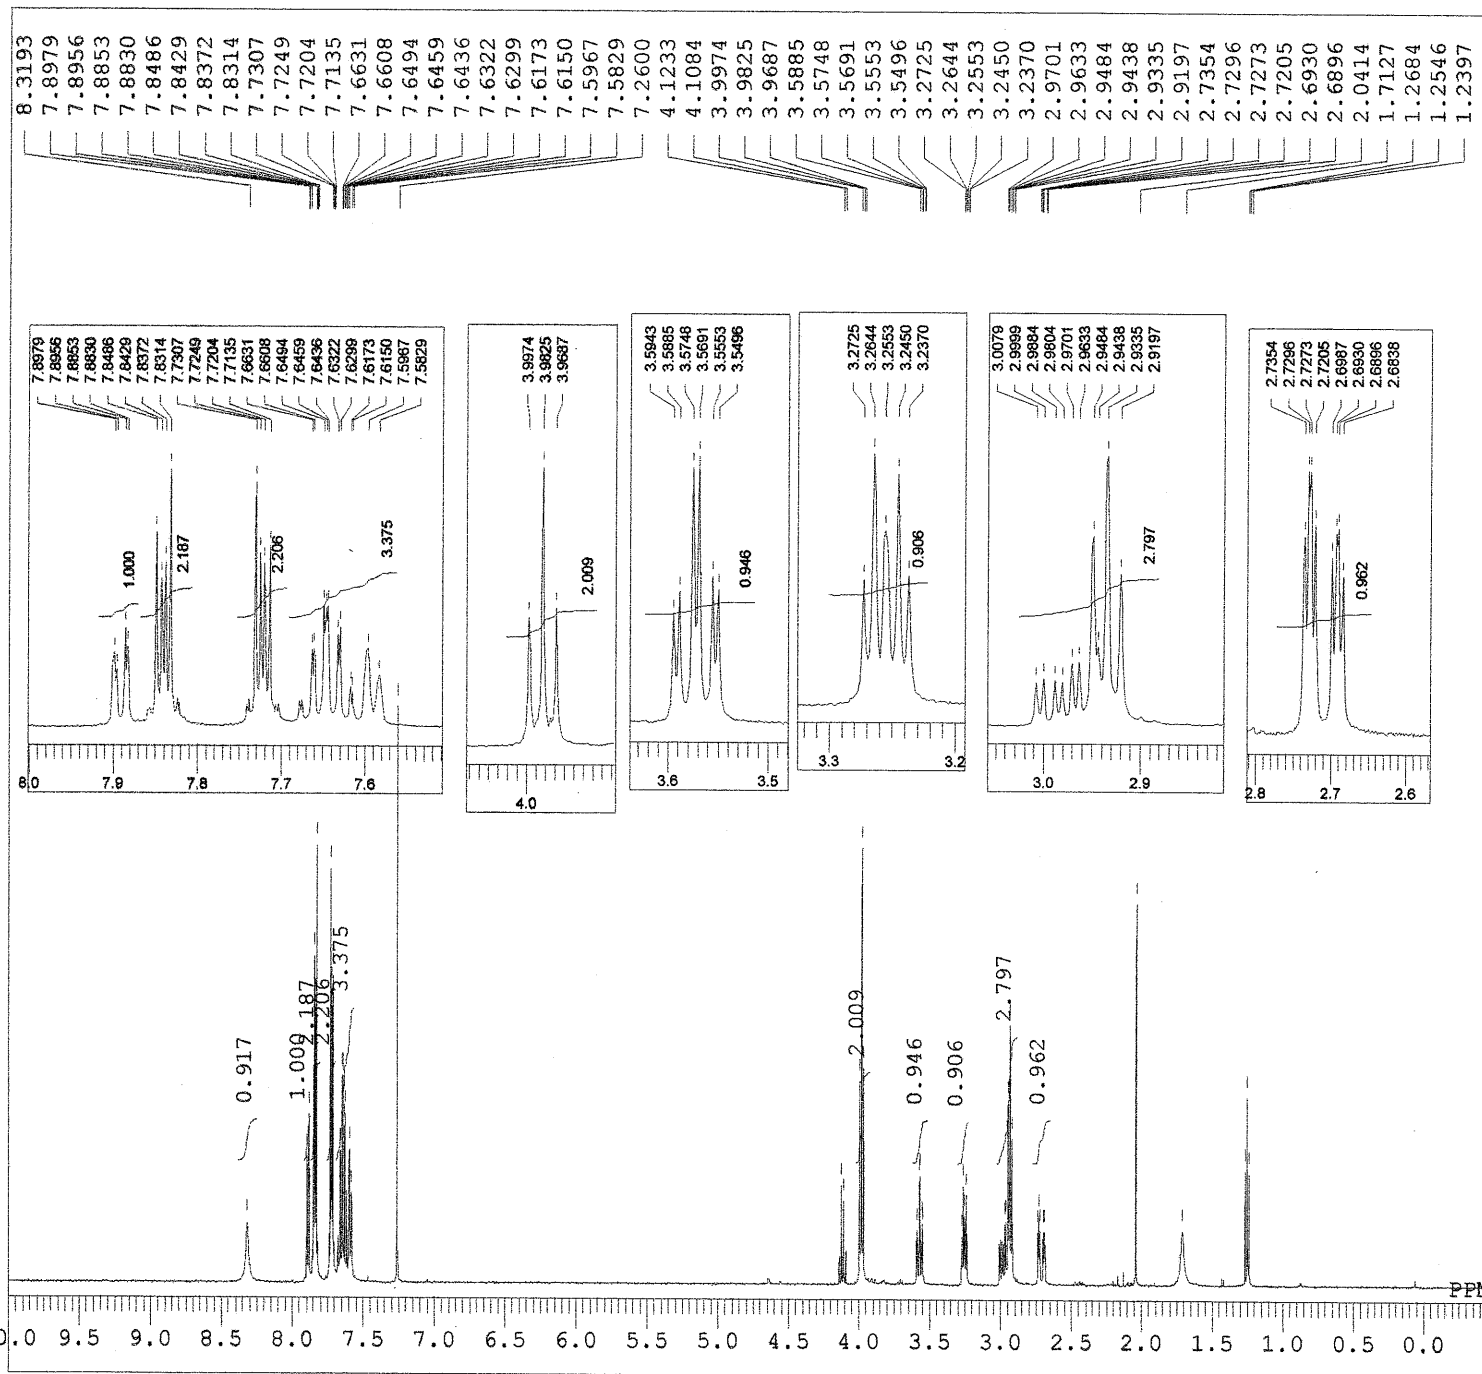

DFILE ozawa04-141\_1\_1H.jdf  
 COMNT C5-NPhth, [O]  
 DATIM 2014-03-12 19:02:30  
 OBNUC 1H  
 EXMOD proton.jxp  
 OBFRQ 500.16 MHz  
 OBSET 2.41 KHz  
 OBFIN 6.01 Hz  
 POINT 16384  
 FREQU 9384.38 Hz  
 SCANS 4  
 ACQTM 1.7459 sec  
 PD 5.0000 sec  
 PW1 5.55 usec  
 IRNUC 1H  
 CTEMP 20.9 c  
 SLVNT CDCL3  
 EXREF 7.26 ppm  
 BF 0.12 Hz  
 RGAIN 40

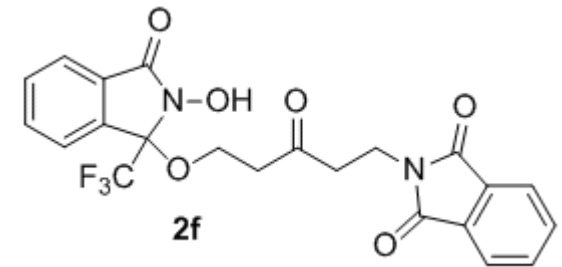



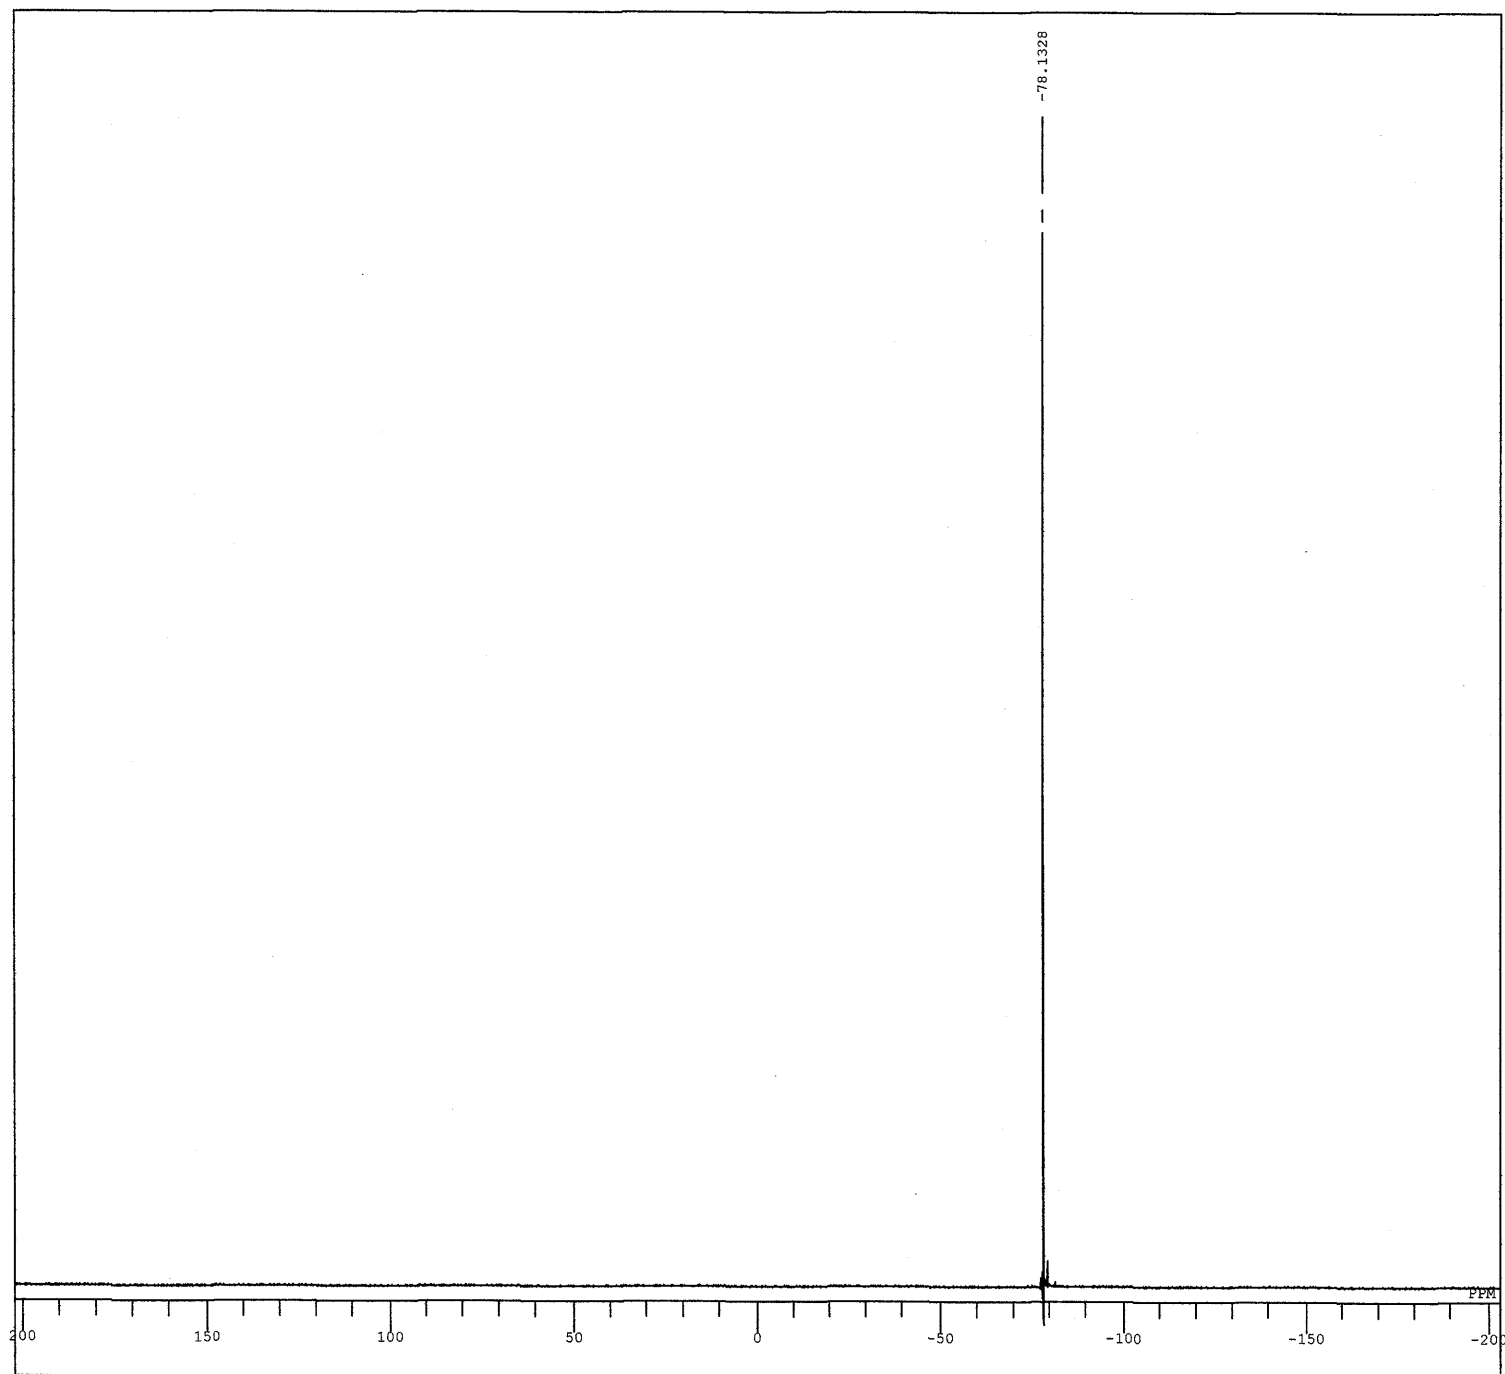

DFILE ozawa04-141\_1\_19F.jdf  
COMNT C5-NPhth, [0]  
DATIM 06-03-2014 20:50:21  
OBNUC 19F  
EXMOD proton.jxp  
OBFRQ 368.64 MHz  
OBSET 7.63 KHz  
OBFIN 2.85 Hz  
POINT 16384  
FREQU 186567.17 Hz  
SCANS 4  
ACQTM 0.0878 sec  
PD 5.0000 sec  
PW1 3.90 usec  
IRNUC 19F  
CTEMP 21.3 c  
SLVNT CDCL3  
EXREF -164.90 ppm  
BF 0.12 Hz  
RGAIN 50

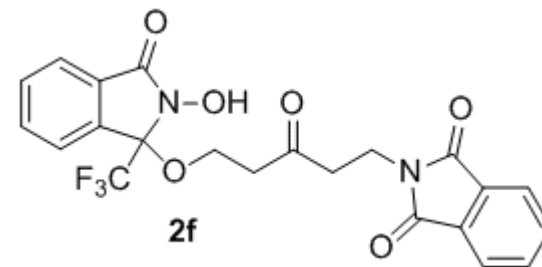

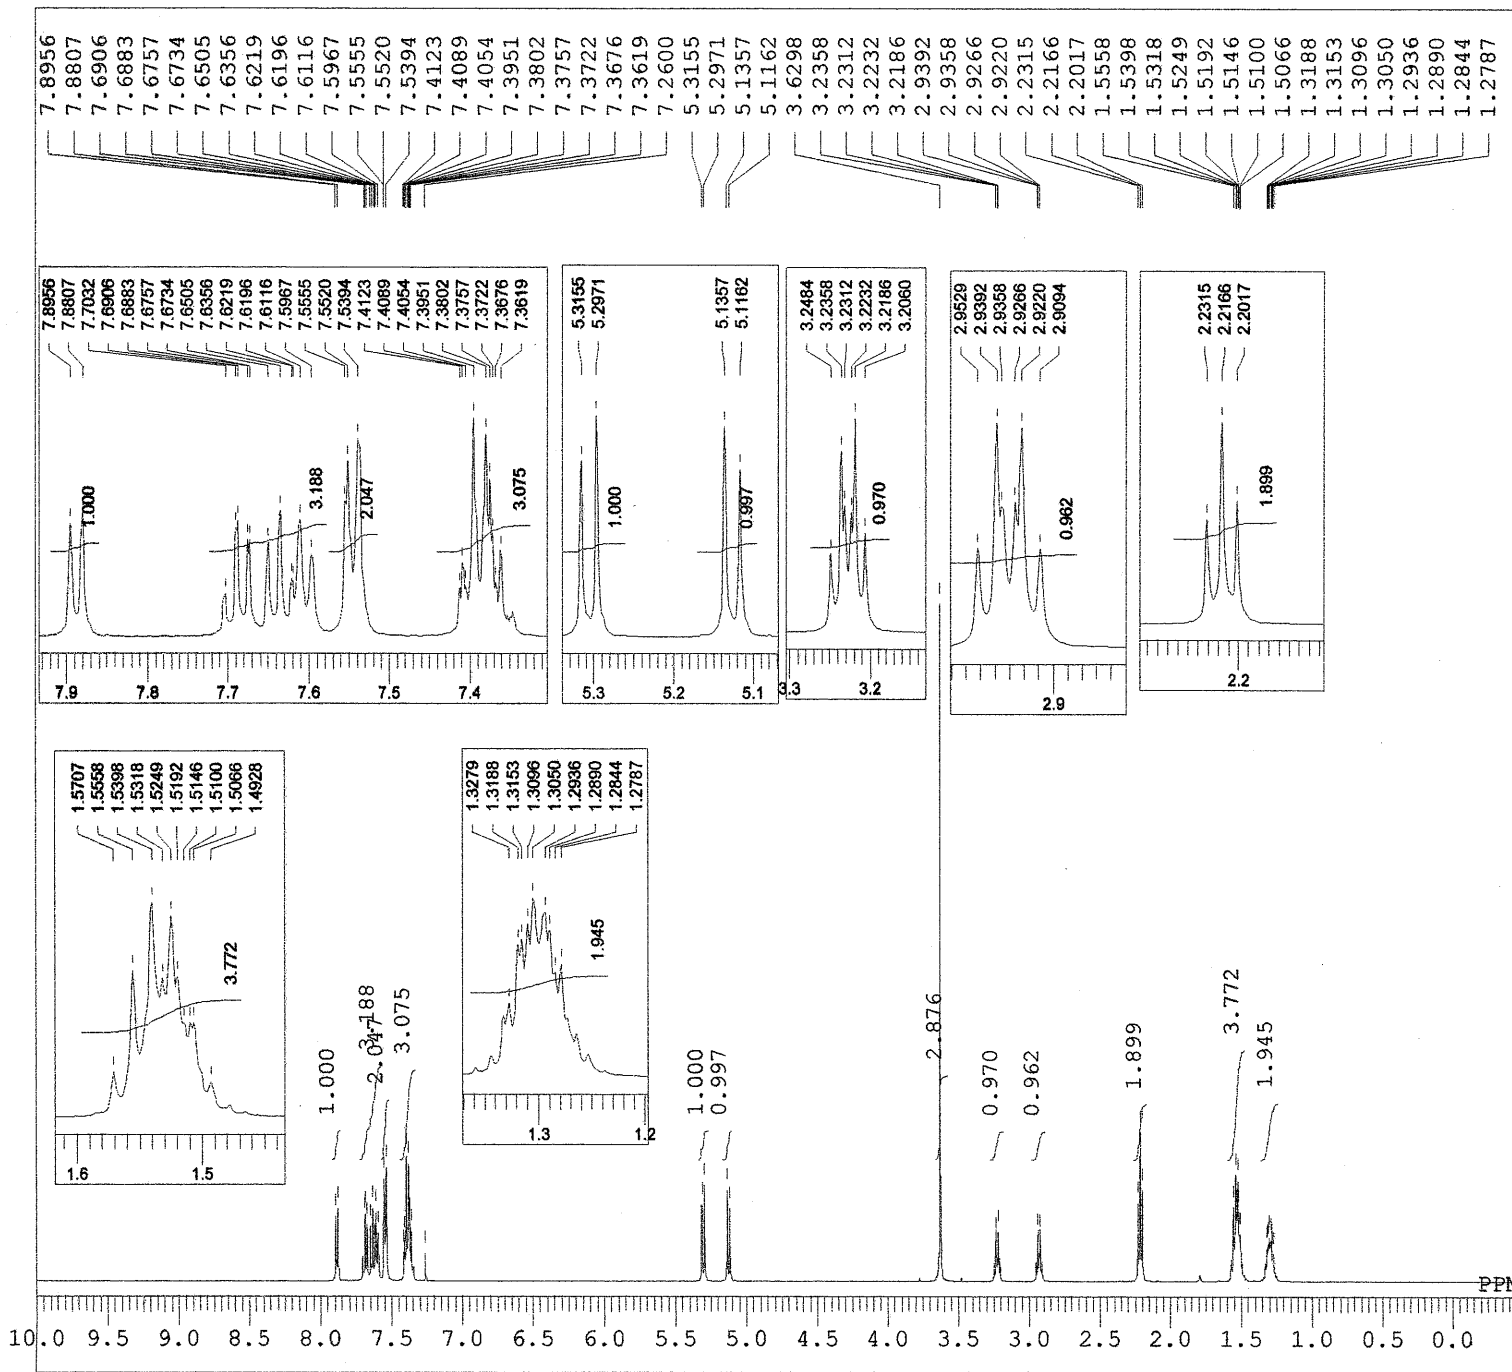

DFILE ozawa04-142\_3\_1H.jdf  
 COMNT C5-CO2Me, Bn  
 DATIM 2014-03-06 19:51:58  
 OBNUC 1H  
 EXMOD proton.jxp  
 OBFRQ 500.16 MHz  
 OBSET 2.41 KHz  
 OBFIN 6.01 Hz  
 POINT 16384  
 FREQU 9384.38 Hz  
 SCANS 4  
 ACQTM 1.7459 sec  
 PD 5.0000 sec  
 PW1 5.55 usec  
 IRNUC 1H  
 CTEMP 21.9 c  
 SLVNT CDCL3  
 EXREF 7.26 ppm  
 BF 0.12 Hz  
 RGAIN 30

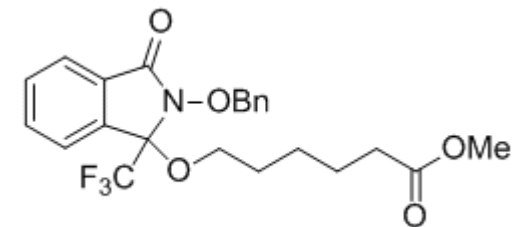

S4g



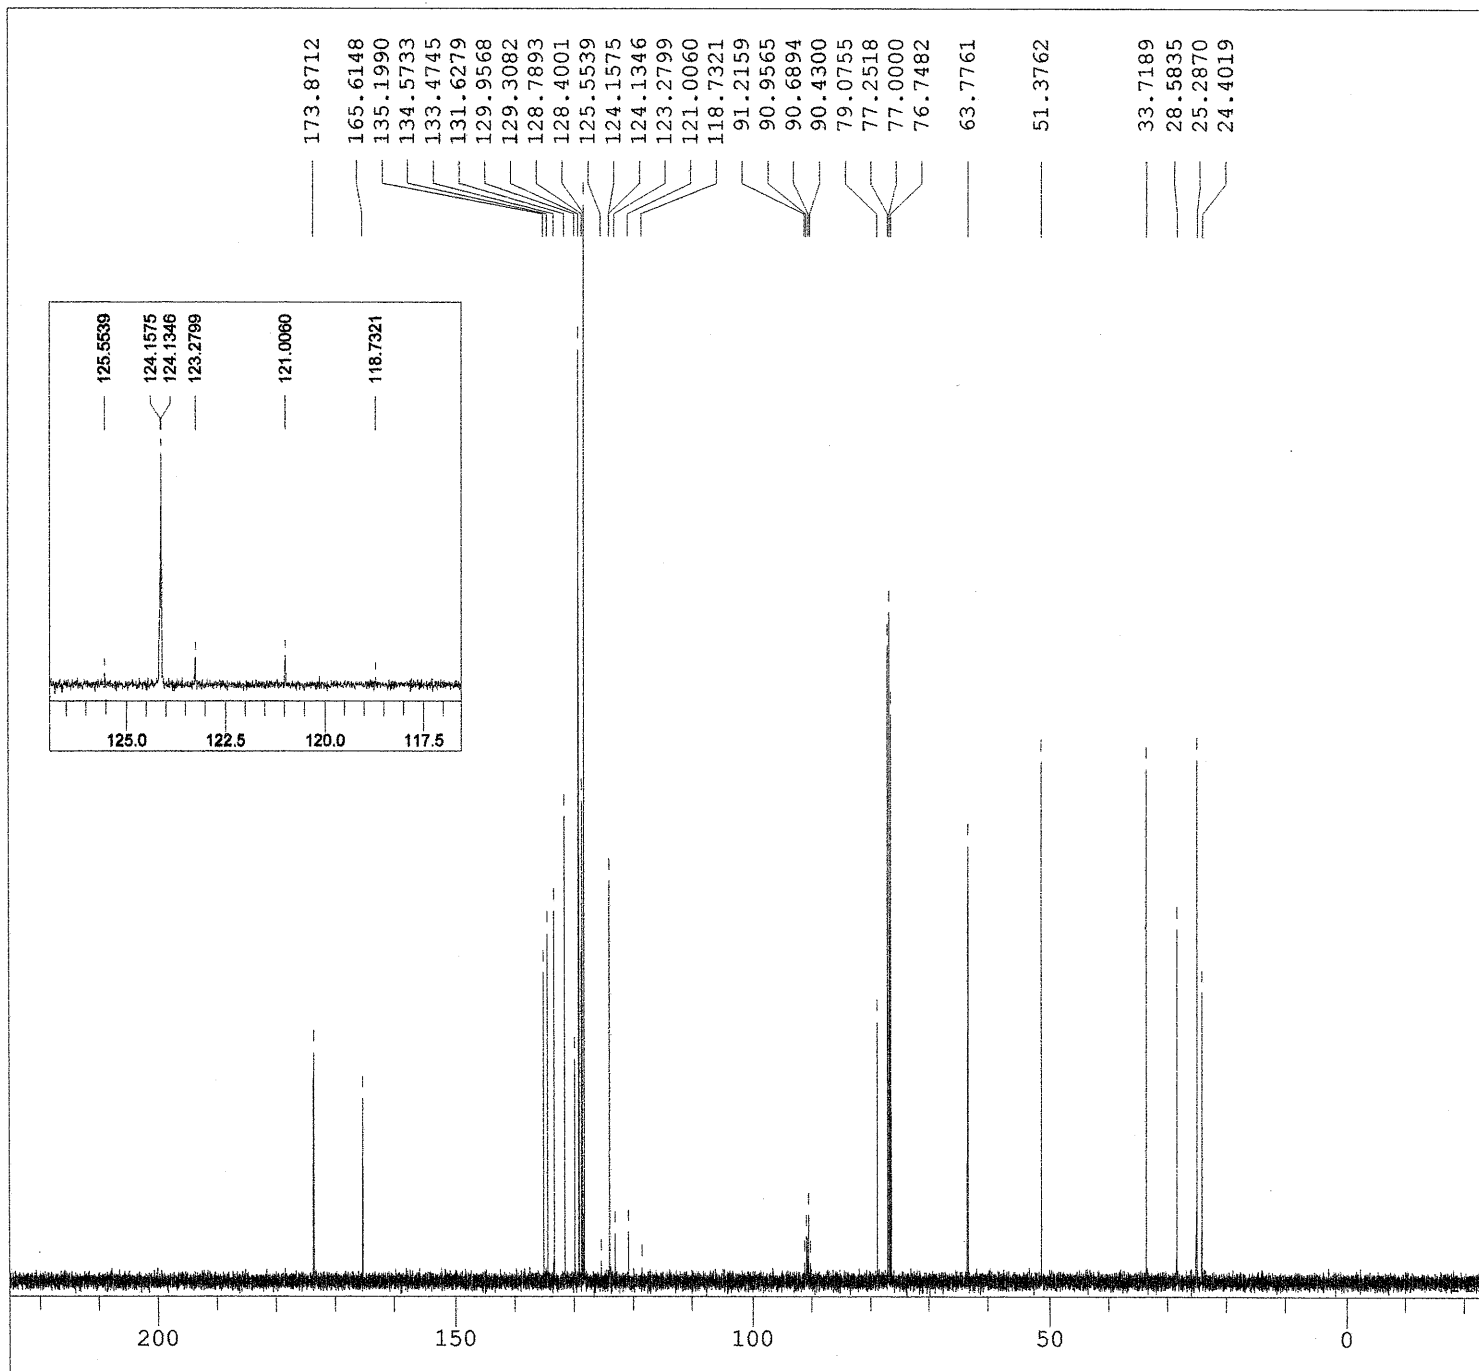

```

DFILE  ozawa04-142_3_13C.jdf
COMNT  C5-CO2Me, Bn
DATIM  2014-03-06 19:53:09
OBNUC  13C
EXMOD  carbon.jxp
OBFRQ  125.77 MHz
OBSET  7.87 KHz
OBFIN  4.21 Hz
POINT  32768
FREQU  31446.54 Hz
SCANS  144
ACQTM  1.0420 sec
PD      3.0000 sec
PW1     3.40 usec
IRNUC  1H
CTEMP  21.9 c
SLVNT  CDCL3
EXREF  77.00 ppm
BF      0.12 Hz
RGAIN  72
    
```

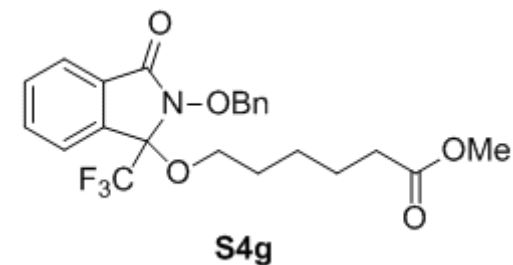

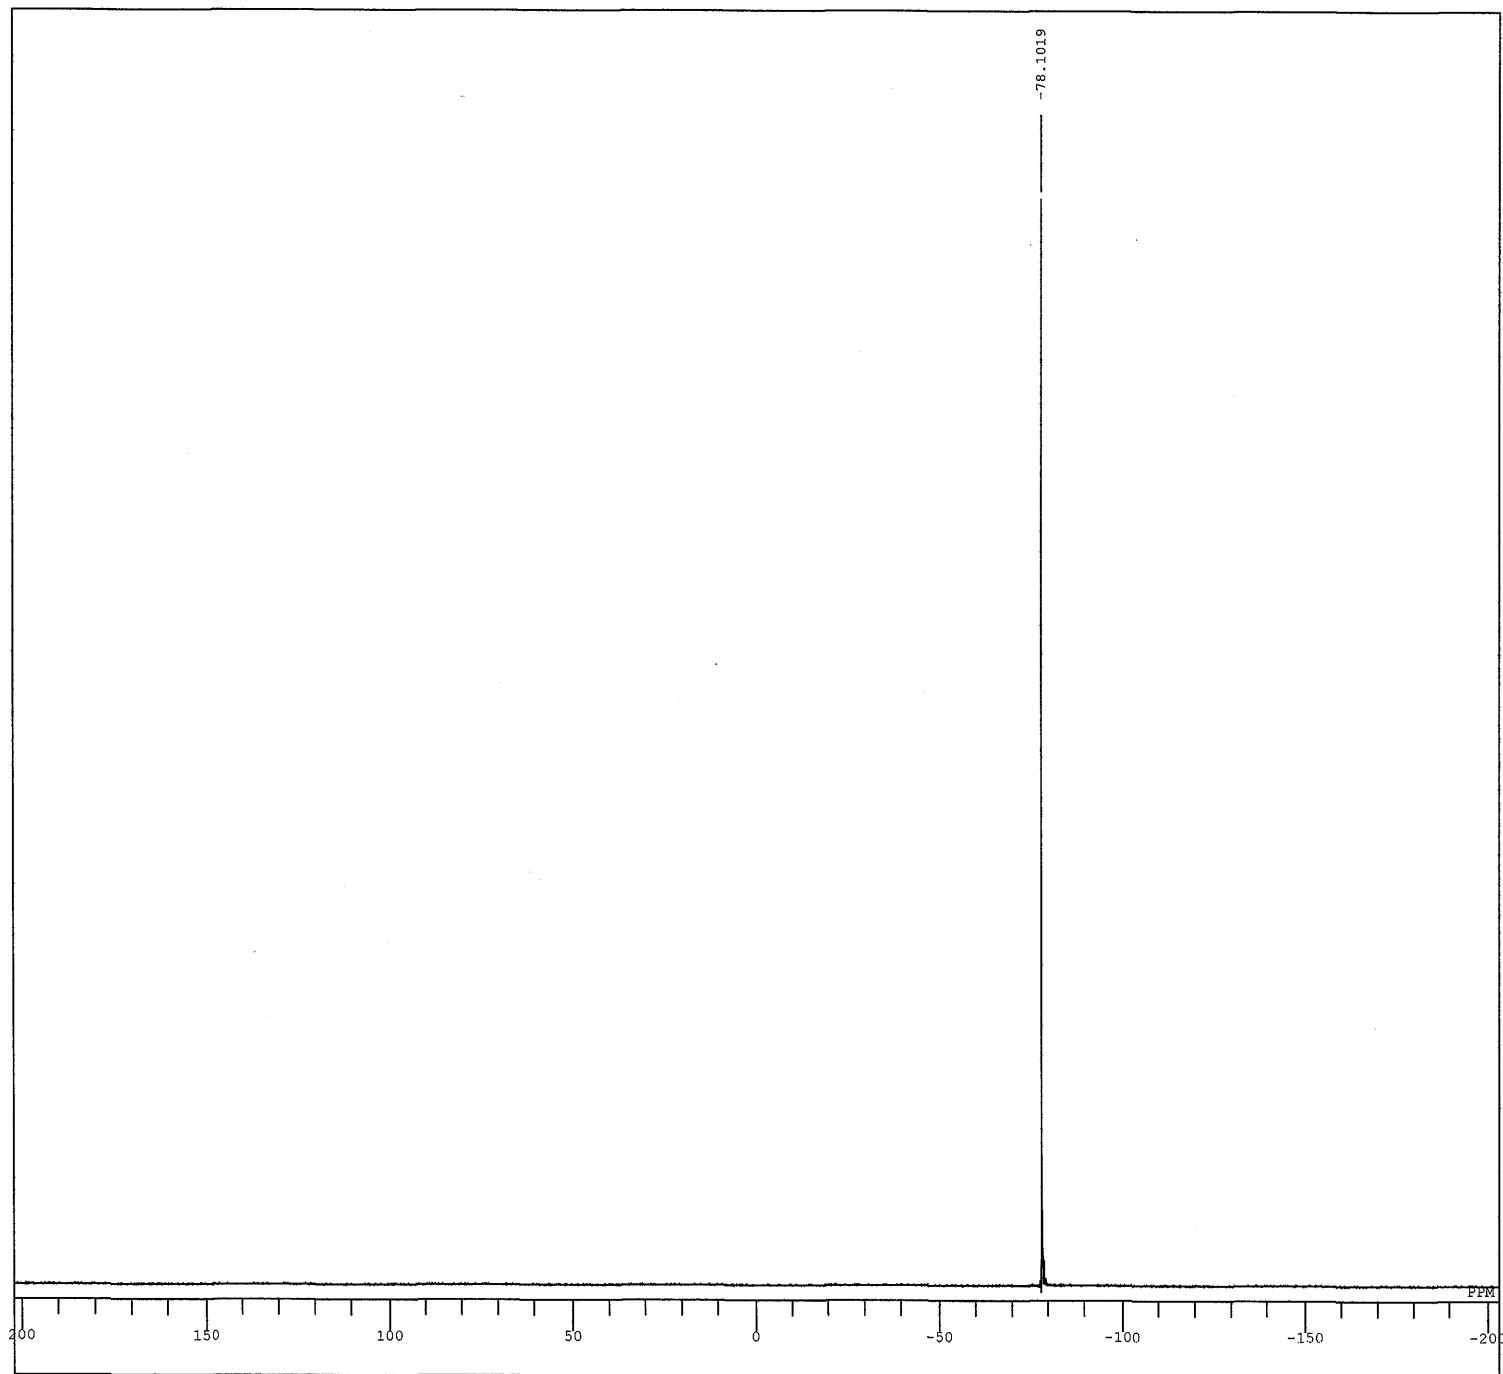

DFILE ozawa04-142\_3\_19F.jdf  
COMNT C5CO2Me, Bn  
DATIM 06-03-2014 20:44:46  
OBNUC 19F  
EXMOD proton.jxp  
OBFRO 368.64 MHz  
OBSEF 7.63 KHz  
OBFIN 2.85 Hz  
POINT 16384  
FREQU 186567.17 Hz  
SCANS 4  
ACQTM 0.0878 sec  
PD 5.0000 sec  
PW1 3.90 usec  
IRNUC 19F  
CTEMP 21.0 c  
SLVNT CDCL3  
EXREF -164.90 ppm  
BF 0.12 Hz  
RGAIN 44

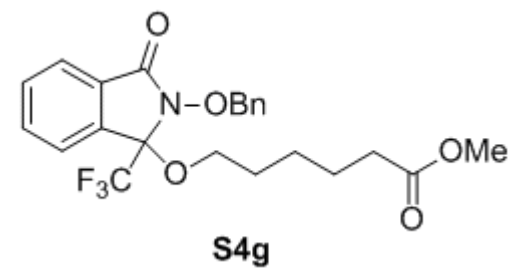

OH

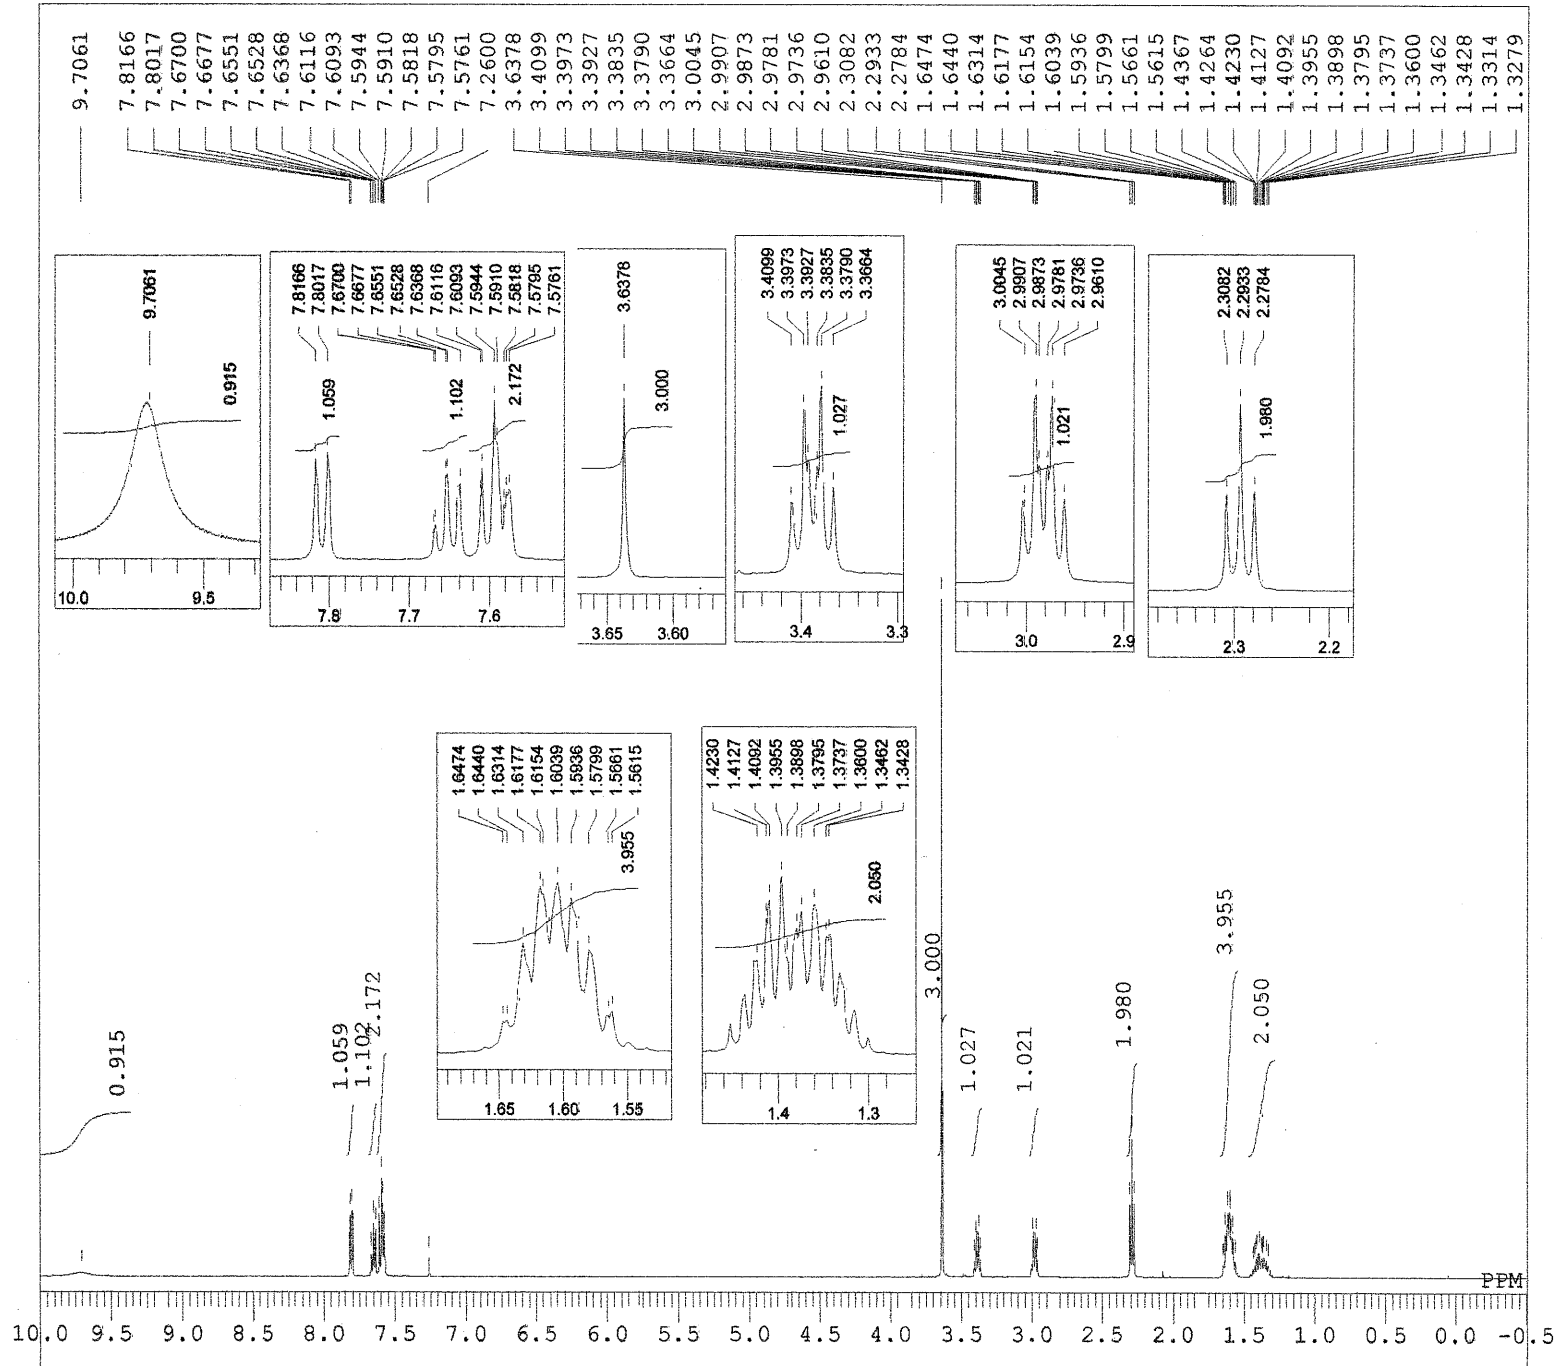

DFILE Ni\_C5-CO2Me\_1H.jdf  
 COMNT OH  
 DATIM 2014-03-03 20:26:24  
 OBNUC 1H  
 EXMOD proton.jxp  
 OBFRQ 500.16 MHz  
 OBSET 2.41 KHz  
 OBFIN 6.01 Hz  
 POINT 16384  
 FREQU 9384.38 Hz  
 SCANS 4  
 ACQTM 1.7459 sec  
 PD 5.0000 sec  
 PW1 5.55 usec  
 IRNUC 1H  
 CTEMP 21.1 c  
 SLVNT CDCL3  
 EXREF 7.26 ppm  
 BF 0.12 Hz  
 RGAIN 28

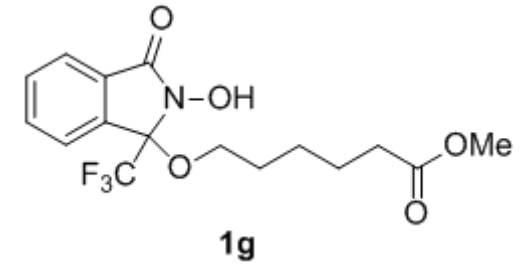

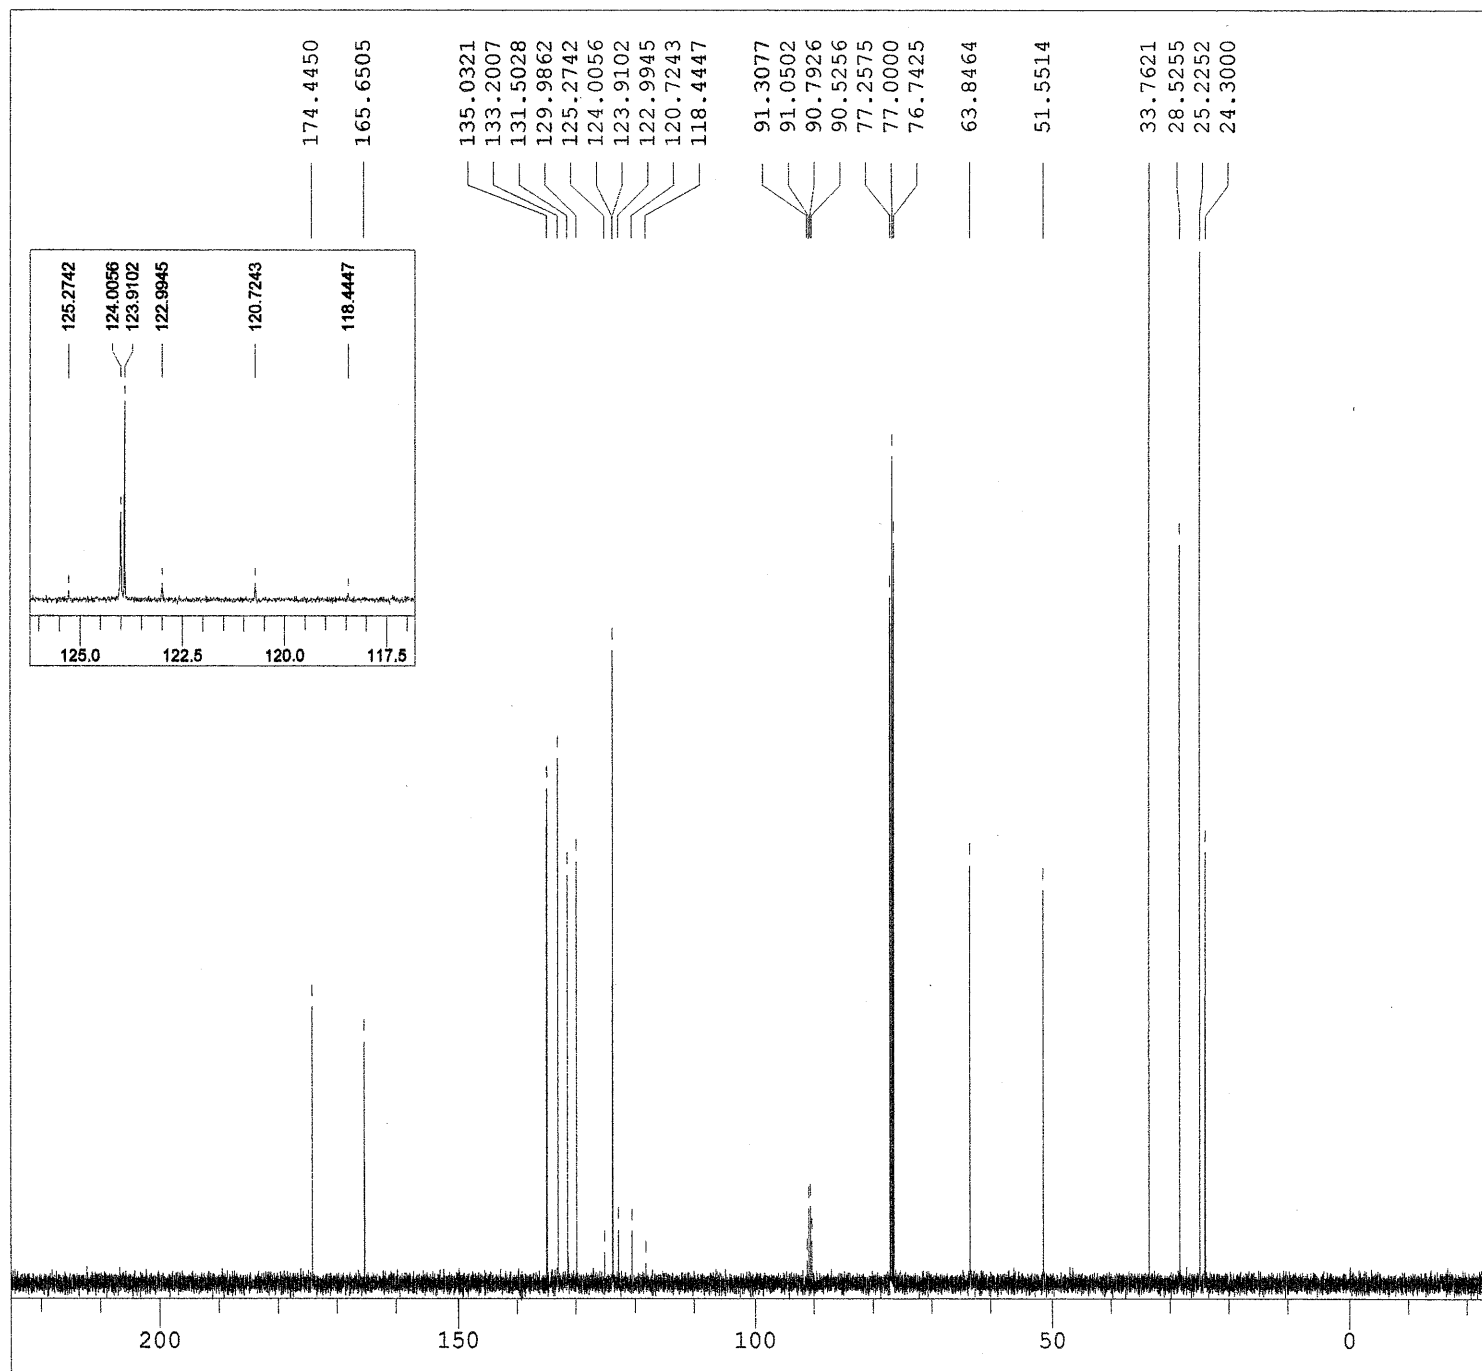

```

DFILE Ni_C5-CO2Me_13C.als
COMNT OH
DATIM 2014-03-03 20:27:27
OBNUC 13C
EXMOD carbon.jxp
OBFRQ 125.77 MHz
OBSET 7.87 KHz
OBFIN 4.21 Hz
POINT 26214
FREQU 31446.54 Hz
SCANS 124
ACQTM 0.8336 sec
PD 3.0000 sec
PW1 3.40 usec
IRNUC 1H
CTEMP 21.3 c
SLVNT CDCL3
EXREF 77.00 ppm
BF 0.12 Hz
RGAIN 60

```

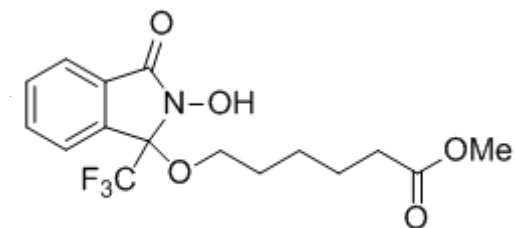

1g

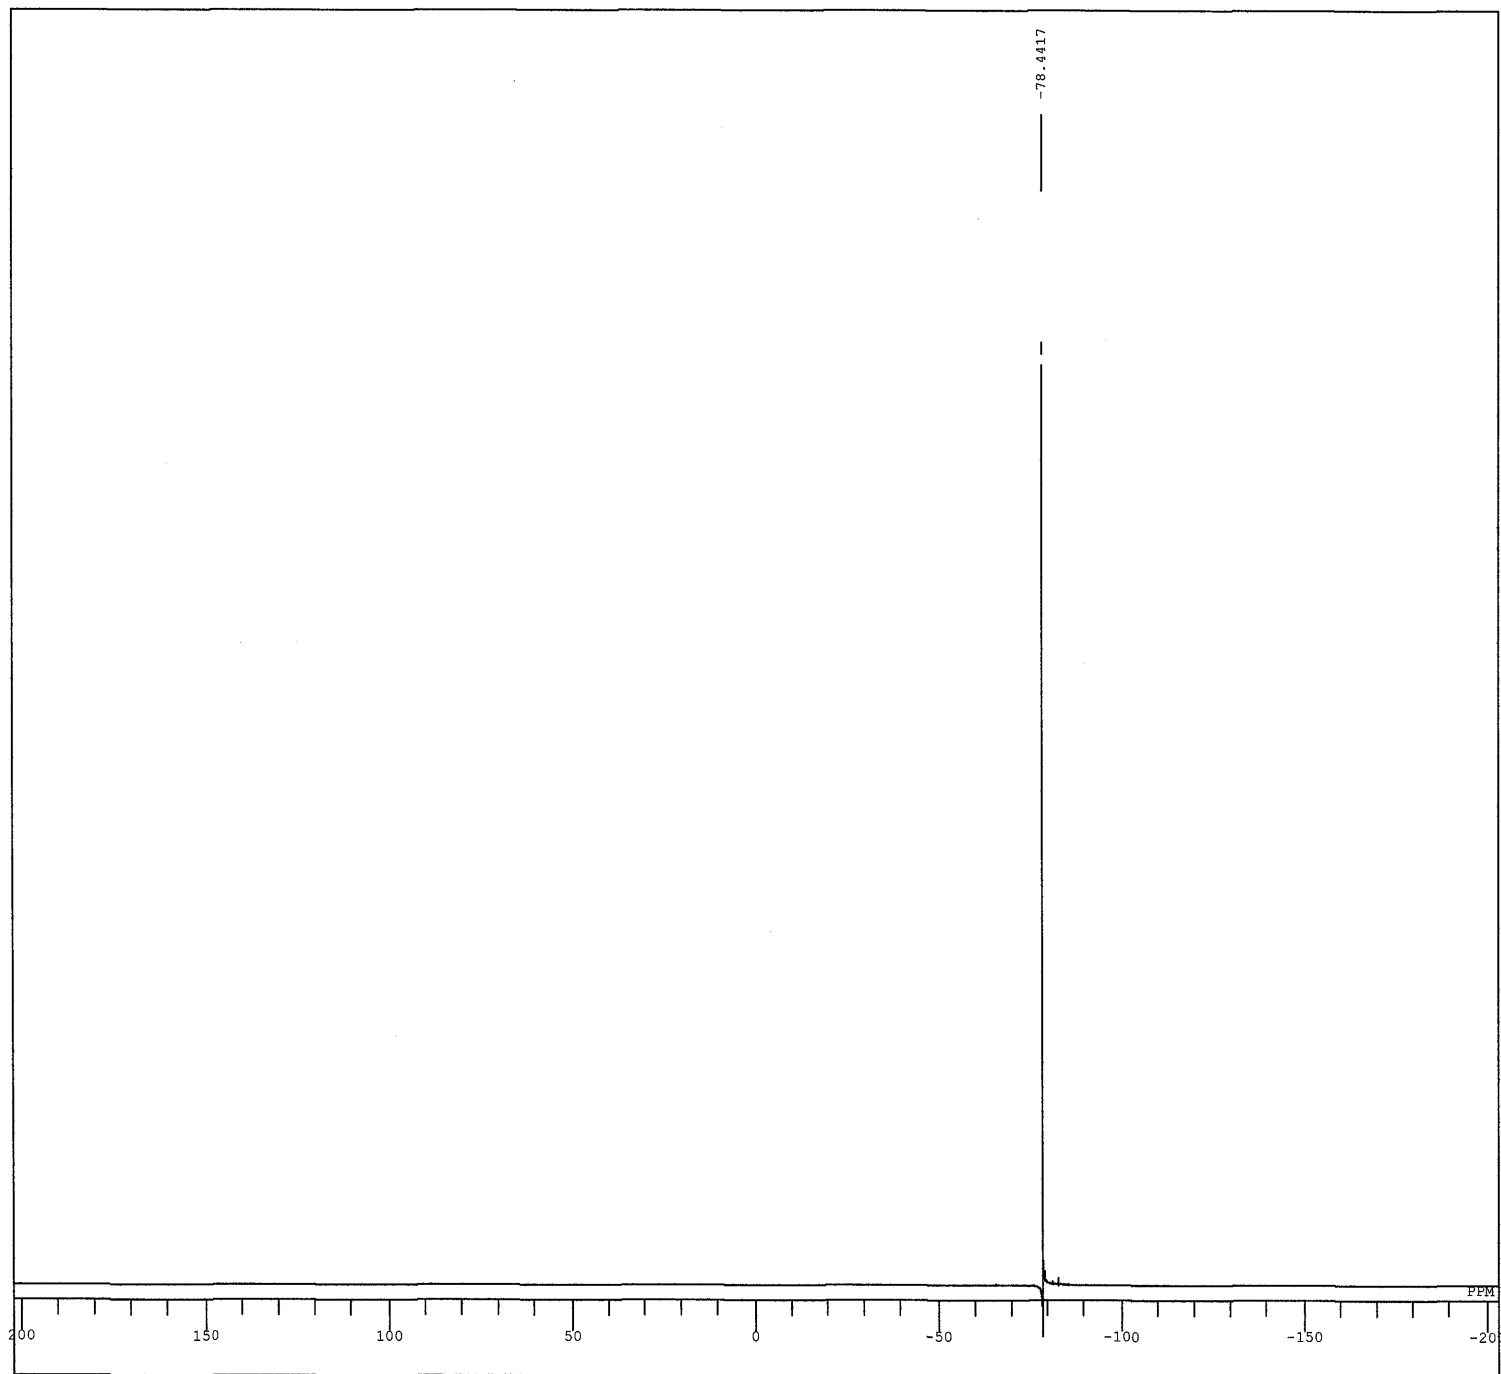

DFILE Ni\_C5-CO2Me\_19F.jdf  
COMNT OH  
DATIM 03-03-2014 21:00:27  
OBNUC 19F  
EXMOD proton.jxp  
OBFREQ 368.64 MHz  
OBSETE 7.63 KHz  
OBFIN 2.85 Hz  
POINT 16384  
FREQU 186567.17 Hz  
SCANS 4  
ACQIM 0.0878 sec  
PD 5.0000 sec  
PW1 3.90 usec  
IRNUC 19F  
CTEMP 20.8 c  
SLVNT CDCL3  
EXREF -164.90 ppm  
BF 0.12 Hz  
RGAIN 44

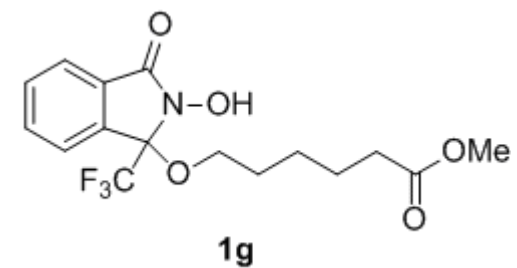

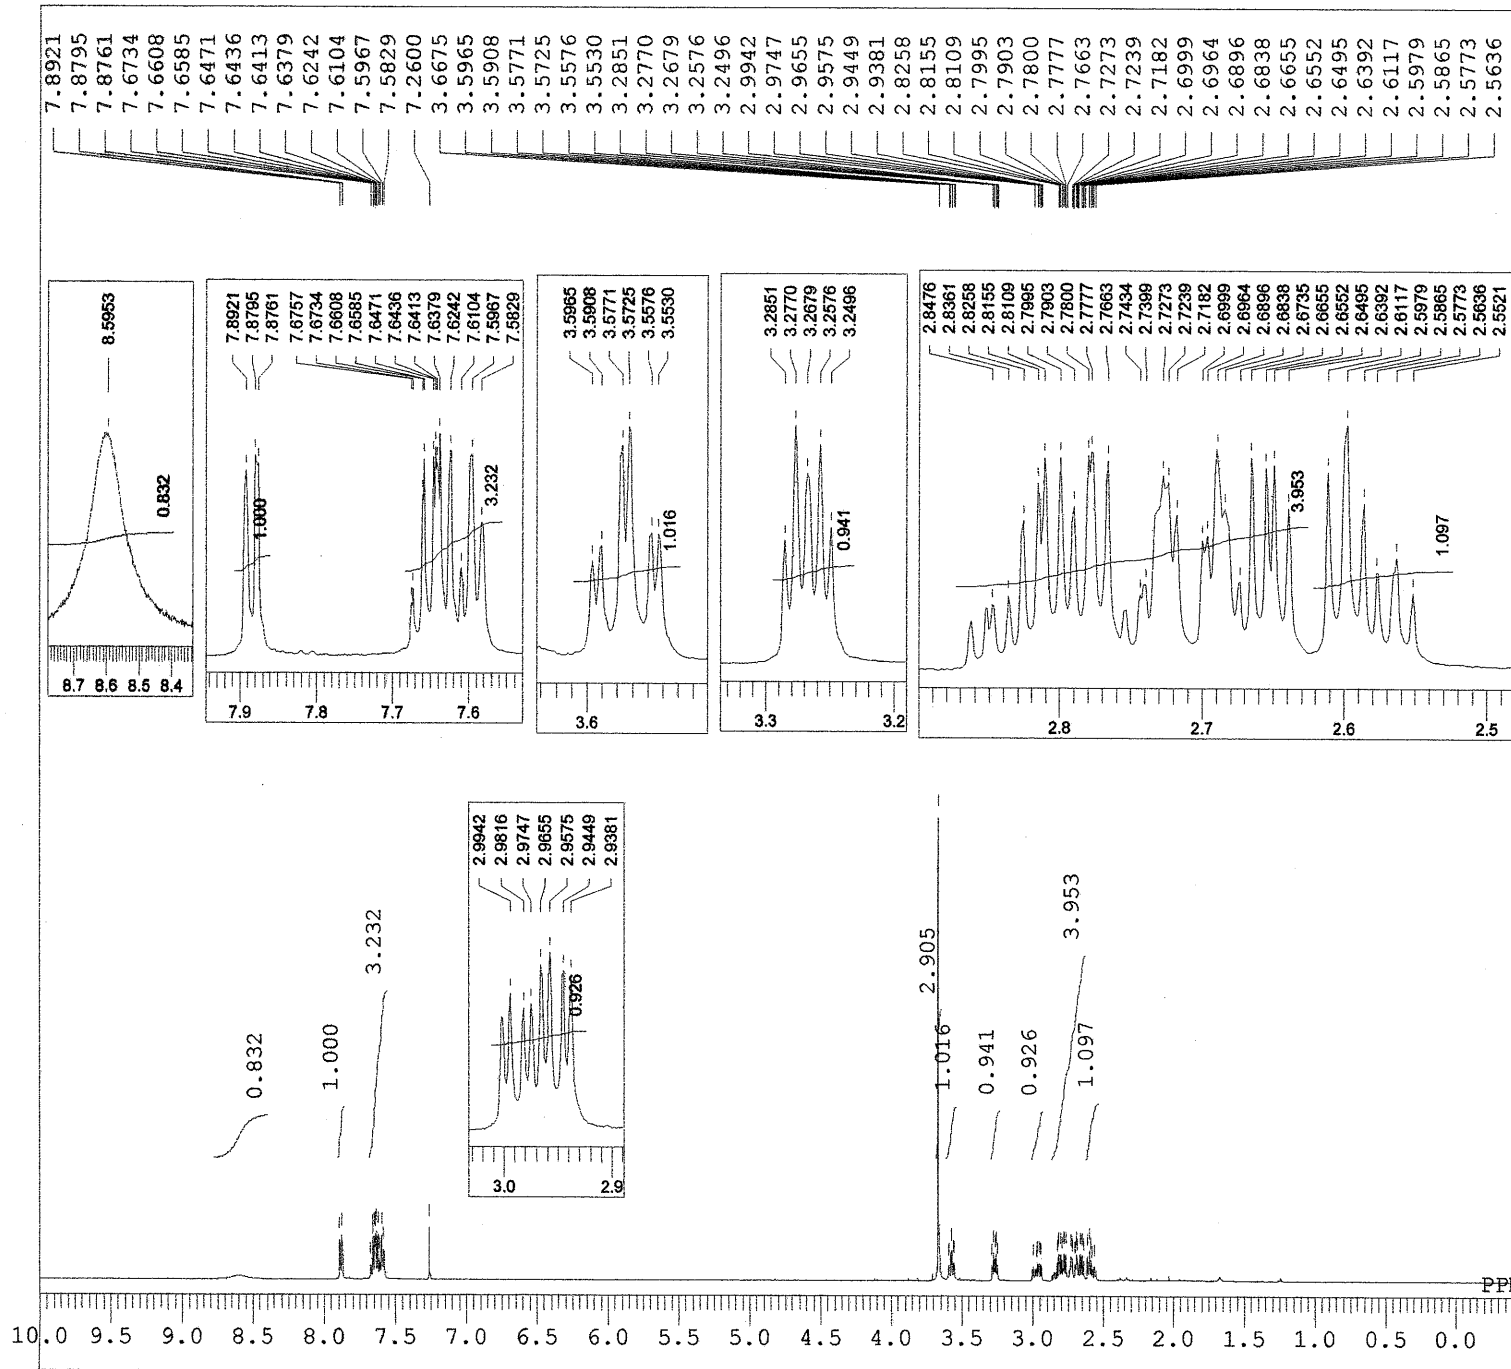

DFILE ozawa04-141\_2\_1H.jdf  
 COMNT C5-CO2Me, [O]  
 DATIM 2014-03-06 20:05:37  
 OBNUC 1H  
 EXMOD proton.jxp  
 OBFRQ 500.16 MHz  
 OBSET 2.41 KHz  
 OBFIN 6.01 Hz  
 POINT 16384  
 FREQU 9384.38 Hz  
 SCANS 4  
 ACQTM 1.7459 sec  
 PD 5.0000 sec  
 PW1 5.55 usec  
 IRNUC 1H  
 CTEMP 21.3 c  
 SLVNT CDCL3  
 EXREF 7.26 ppm  
 BF 0.12 Hz  
 RGAIN 36

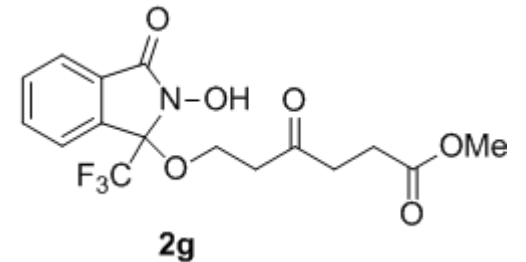

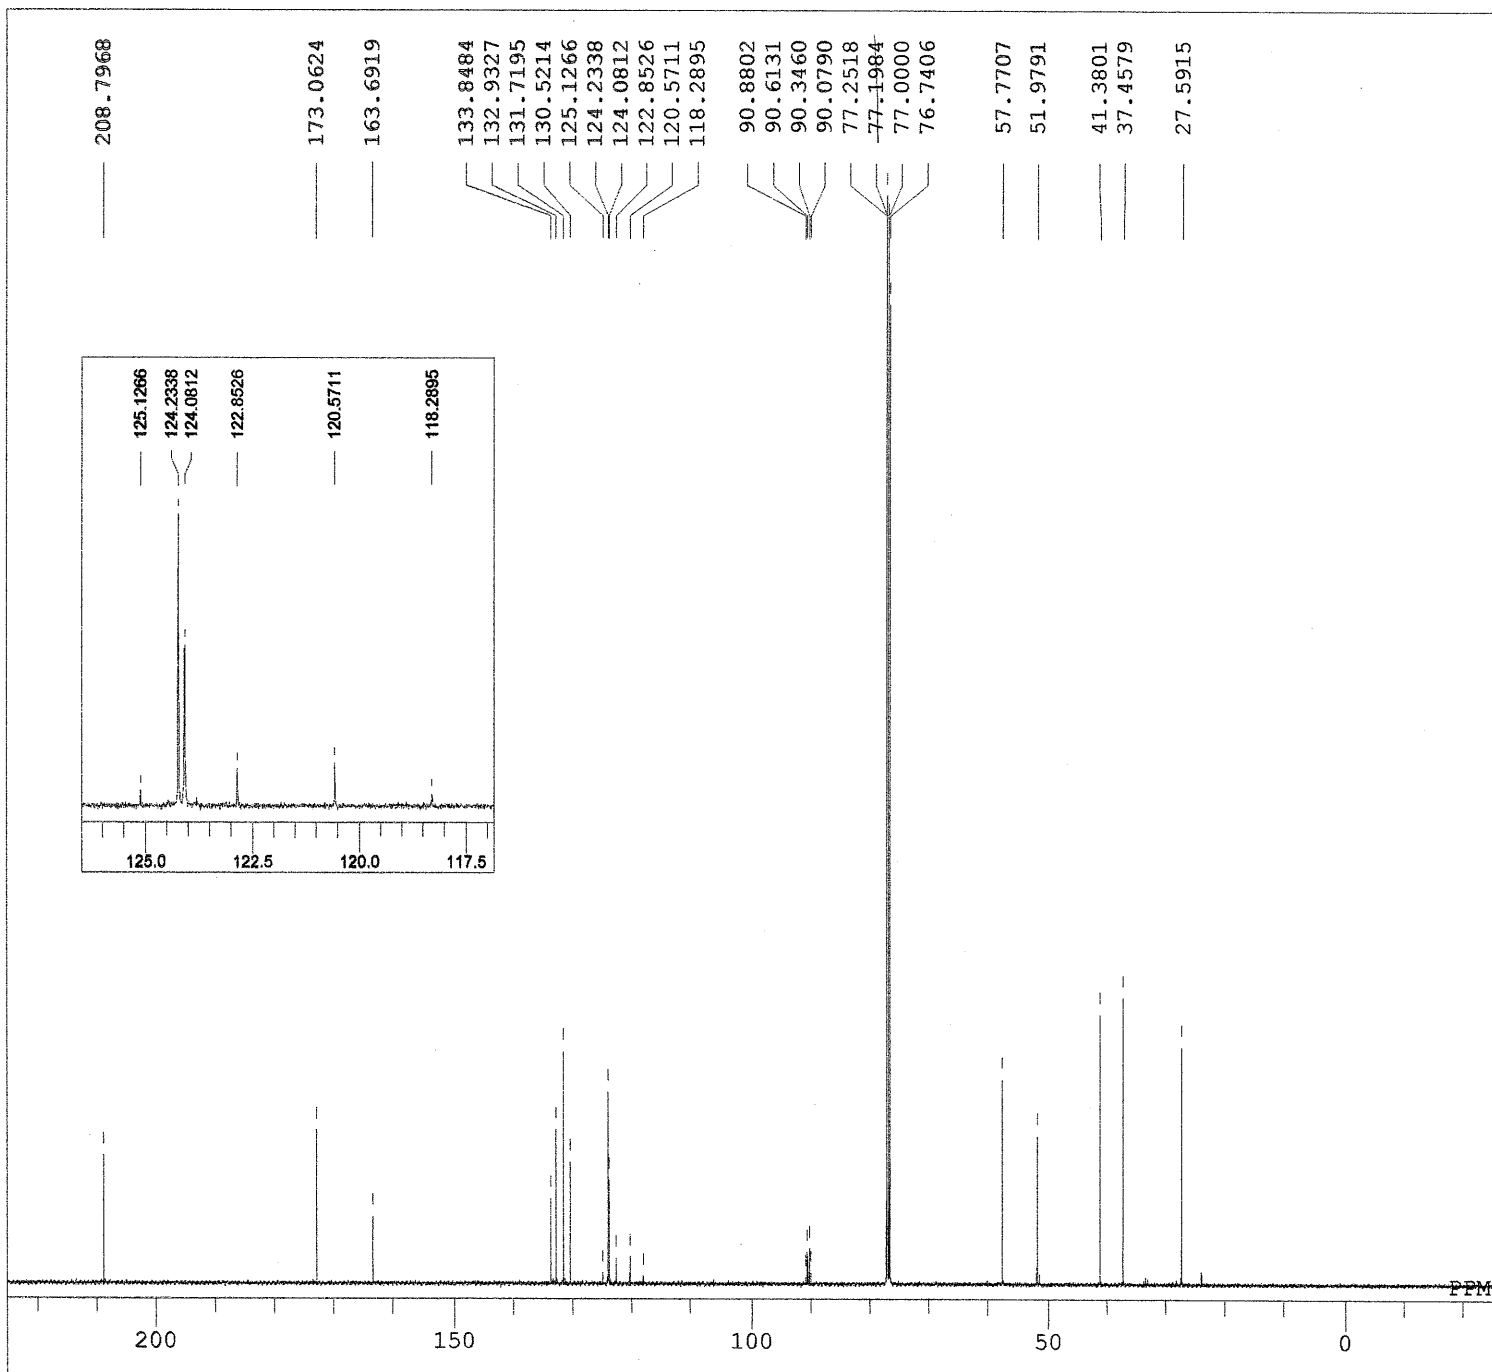

DFILE ozawa04-141\_2\_13C.jdf  
 COMNT C5-CO2Me, [O]  
 DATIM 2014-03-06 22:57:01  
 OBNUC 13C  
 EXMOD carbon.jxp  
 OBFRO 125.77 MHz  
 OBSET 7.87 KHz  
 OBFIN 4.21 Hz  
 POINT 32768  
 FREQU 31446.54 Hz  
 SCANS 9052  
 ACQTM 1.0420 sec  
 PD 3.0000 sec  
 PW1 3.40 usec  
 IRNUC 1H  
 CTEMP 21.9 c  
 SLVNT CDCL3  
 EXREF 77.00 ppm  
 BF 0.12 Hz  
 RGAIN 74

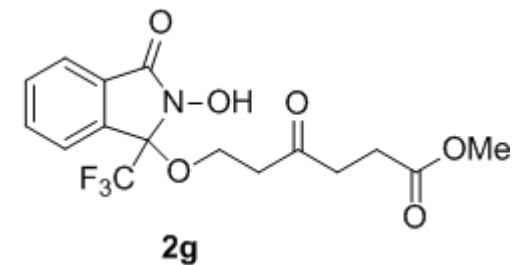

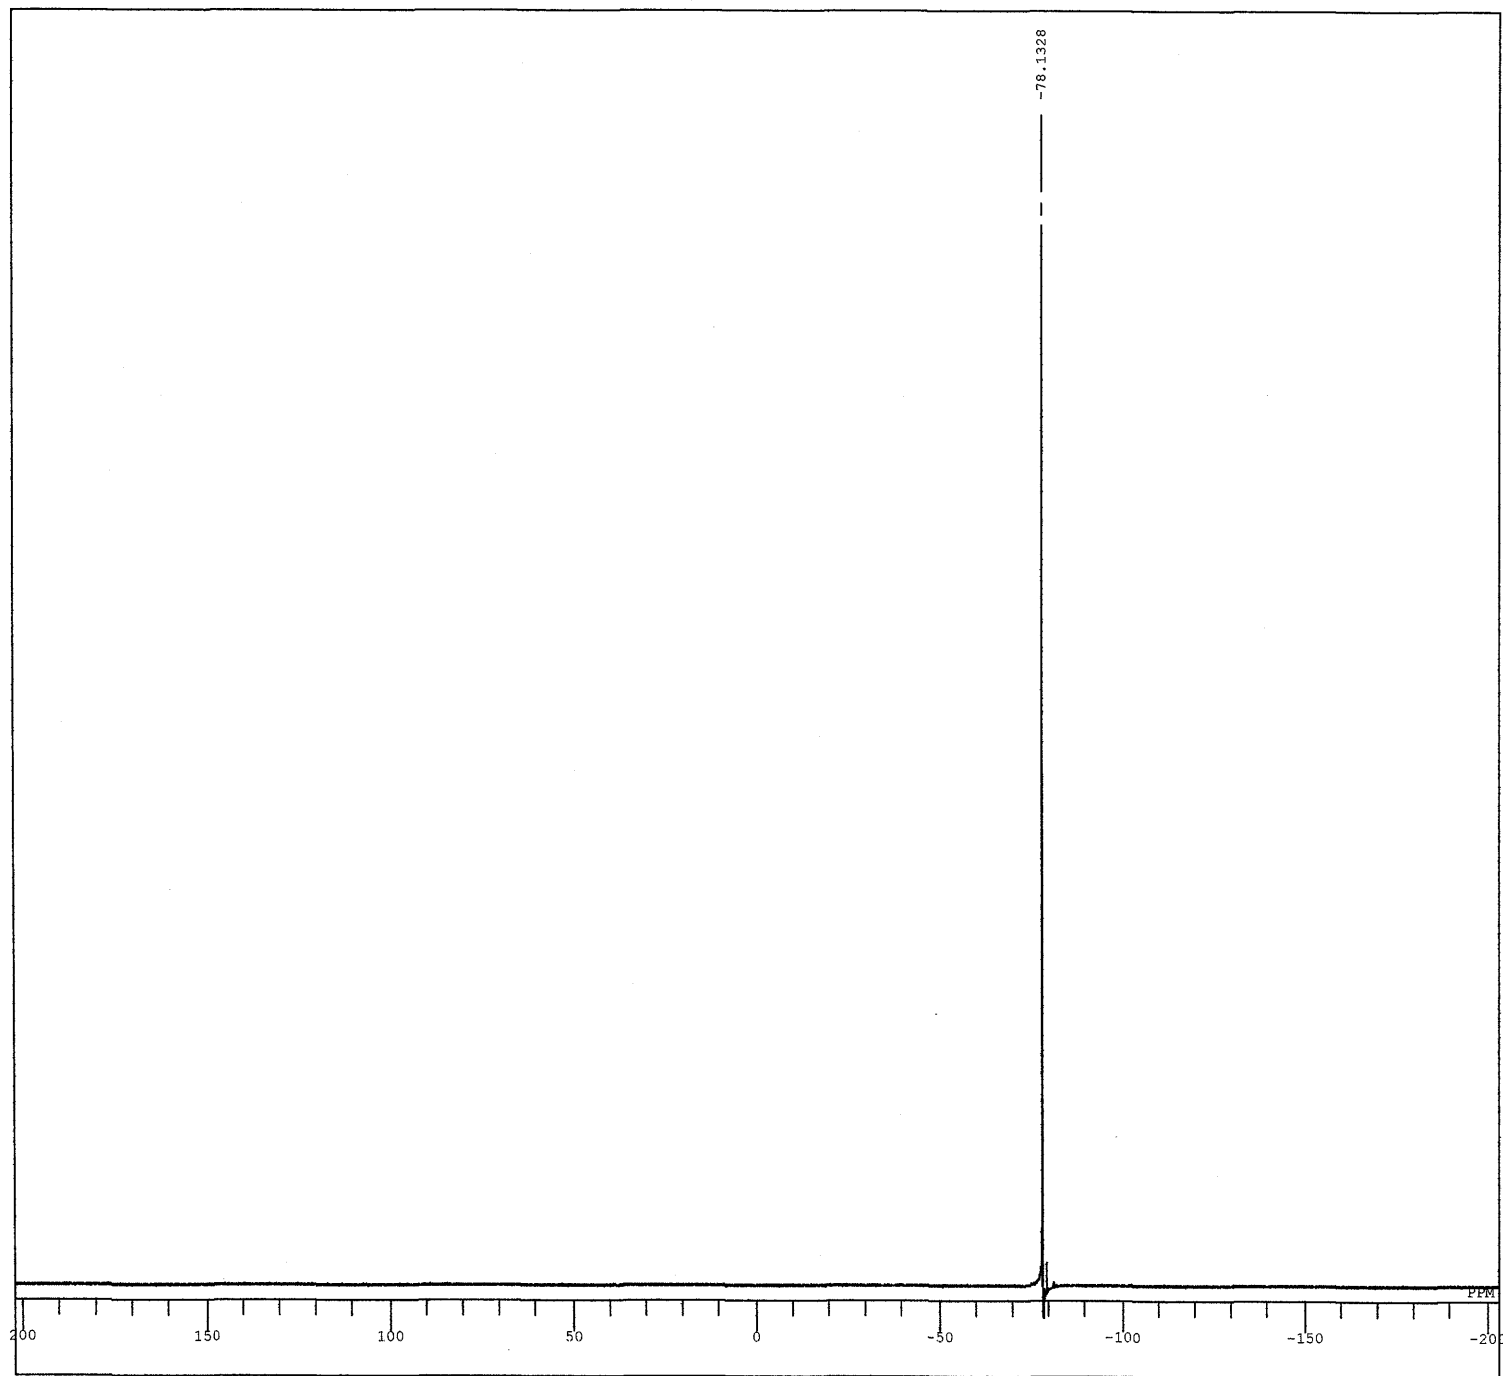

DFILE ozawa04-141\_2\_19F.jdf  
COMNT C5-CO2Me, [O]  
DATIM 06-03-2014 20:47:43  
OBNUC 19F  
EXMOD proton.jxp  
OBFRQ 368.64 MHz  
OBSET 7.63 KHz  
OBFIN 2.85 Hz  
POINT 16384  
FREQU 186567.17 Hz  
SCANS 4  
ACQTM 0.0878 sec  
PD 5.0000 sec  
PW1 3.90 usec  
IRNUC 19F  
CTEMP 21.2 c  
SLVNT CDCL3  
EXREF -164.90 ppm  
BF 0.12 Hz  
RGAIN 48

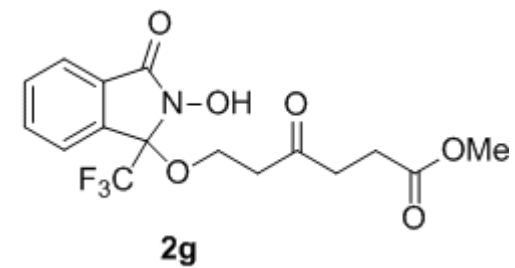



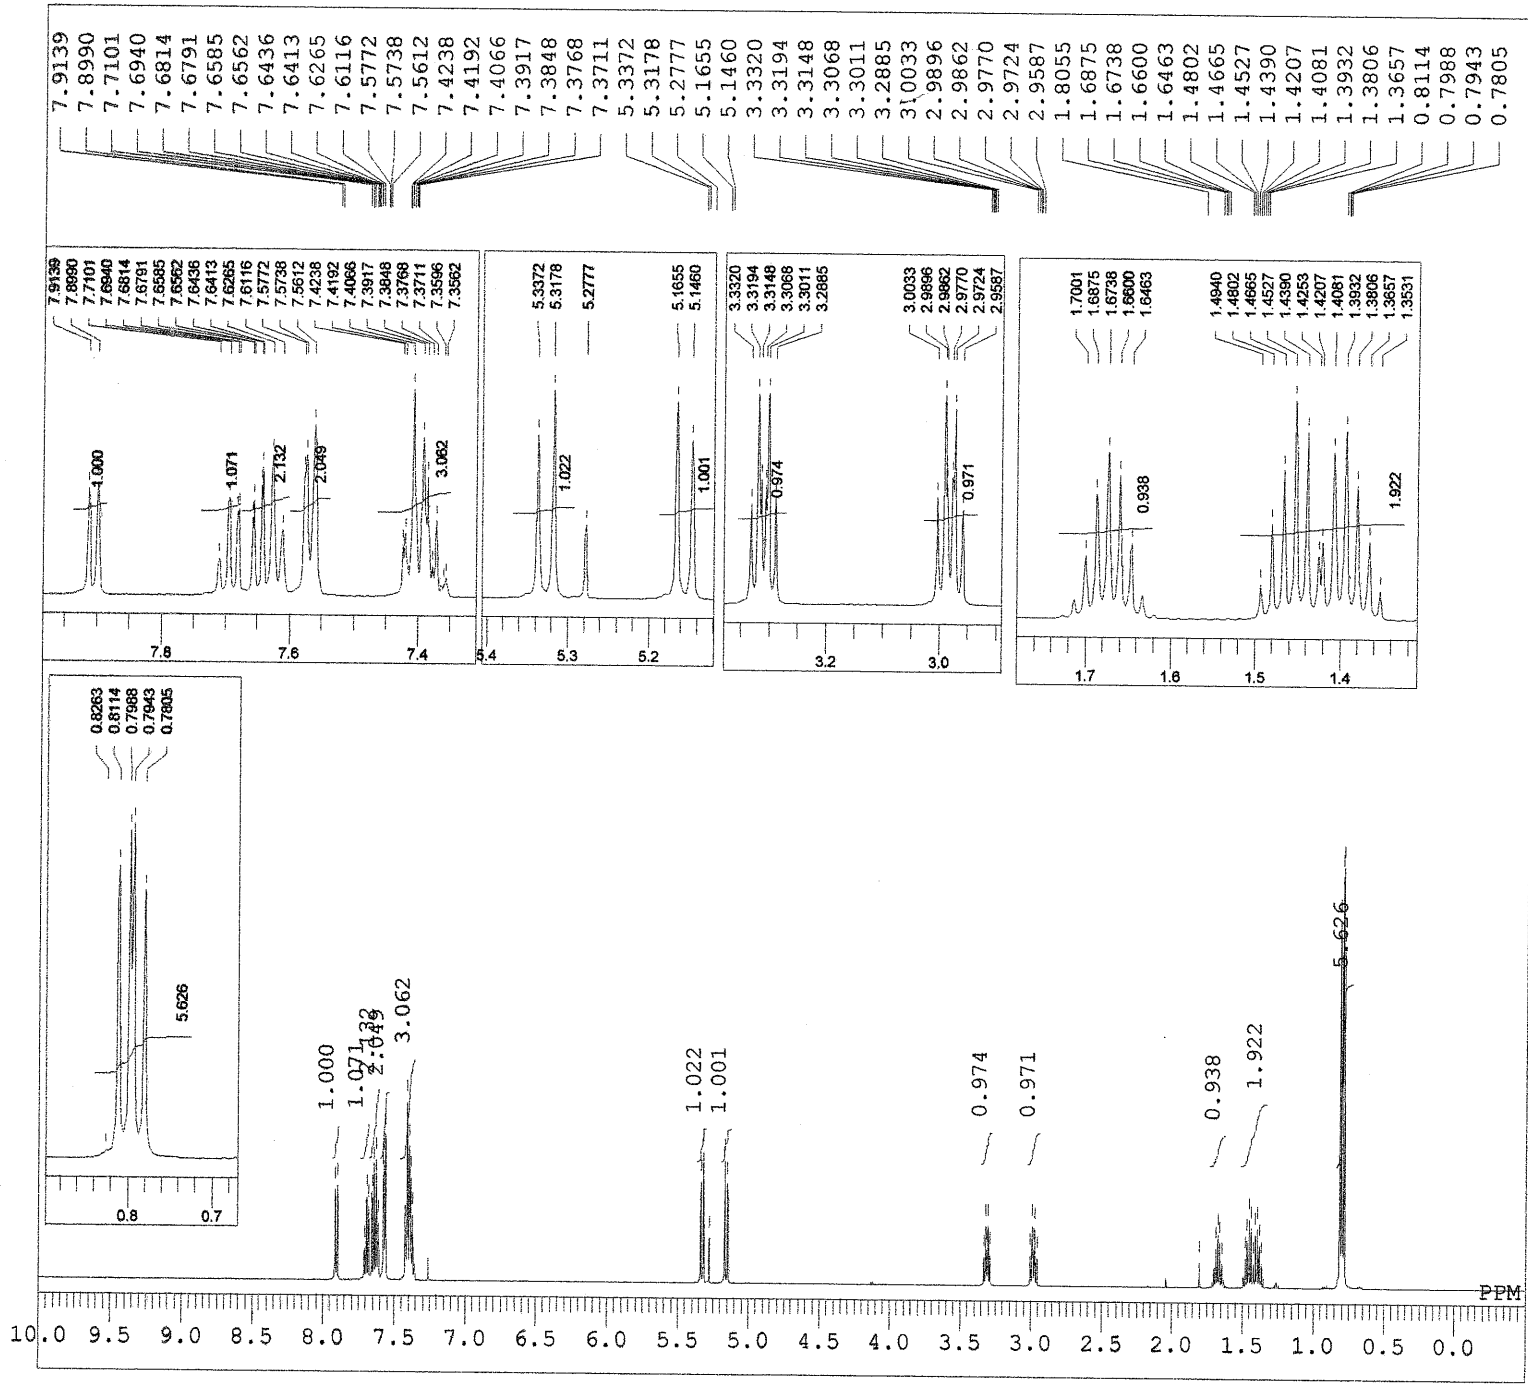

```

DFILE  ozawa04-053_1_1H.jdf
COMNT  3-MeBuOH
DATIM  2013-11-25 14:22:41
OBNUC  1H
EXMOD  proton.jxp
OBFRQ  500.16 MHz
OBSET  2.41 KHz
OBFIN  6.01 Hz
POINT  16384
FREQU  9384.38 Hz
SCANS  4
ACQTM  1.7459 sec
PD      5.0000 sec
PW1     5.55 usec
IRNUC   1H
CTEMP   22.7 c
SLVNT   CDCL3
EXREF   7.26 ppm
BF       0.12 Hz
RGAIN   26
    
```

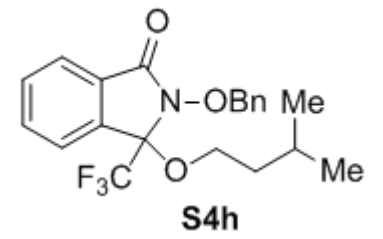

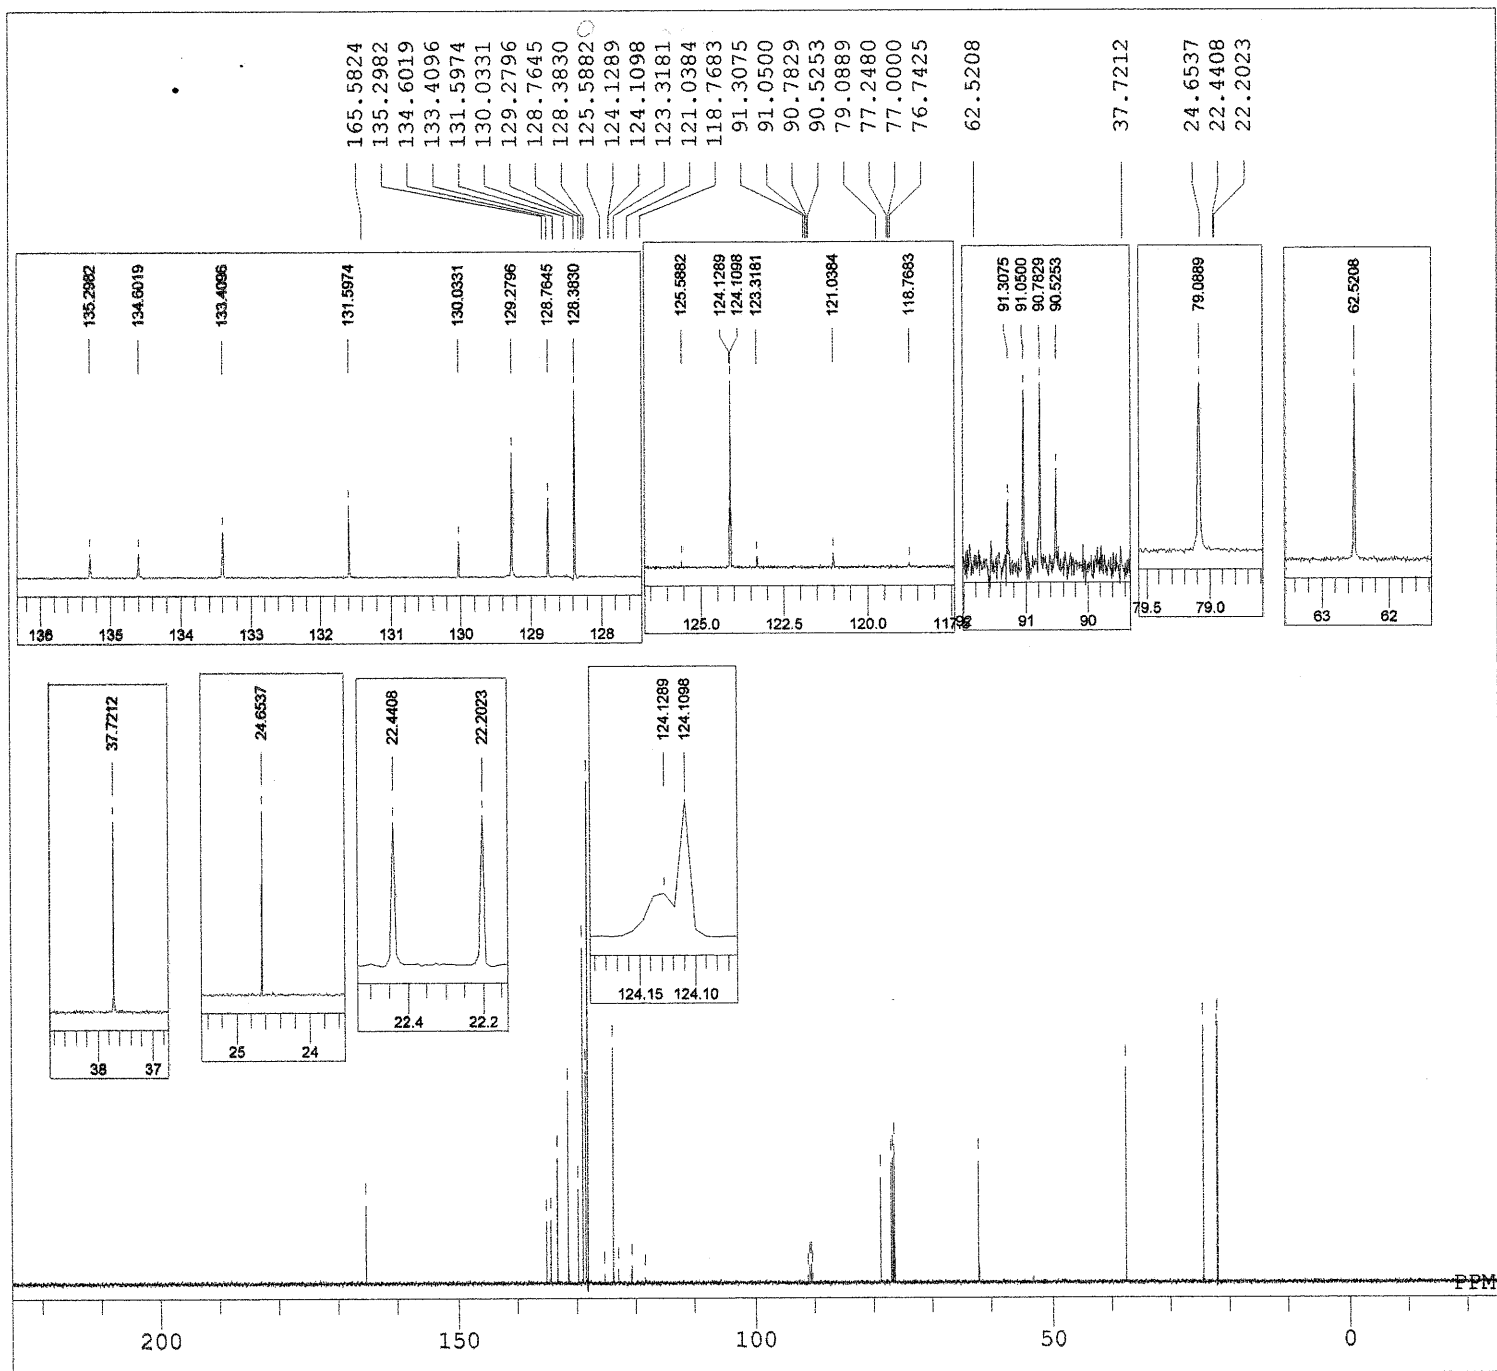

DFILE ozawa04-053\_1\_13C.jdf  
 COMNT 3-MeBuOH  
 DATIM 2013-11-25 17:29:50  
 OBNUC 13C  
 EXMOD carbon.jxp  
 OBFRQ 125.77 MHz  
 OBSET 7.87 KHz  
 OBFIN 4.21 Hz  
 POINT 32767  
 FREQU 39308.18 Hz  
 SCANS 140  
 ACQTM 0.8336 sec  
 PD 3.0000 sec  
 PW1 3.40 usec  
 IRNUC 1H  
 CTEMP 23.5 c  
 SLVNT CDCL3  
 EXREF 77.00 ppm  
 BF 0.12 Hz  
 RGAIN 60

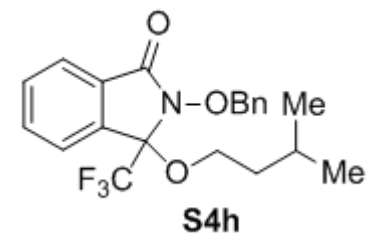

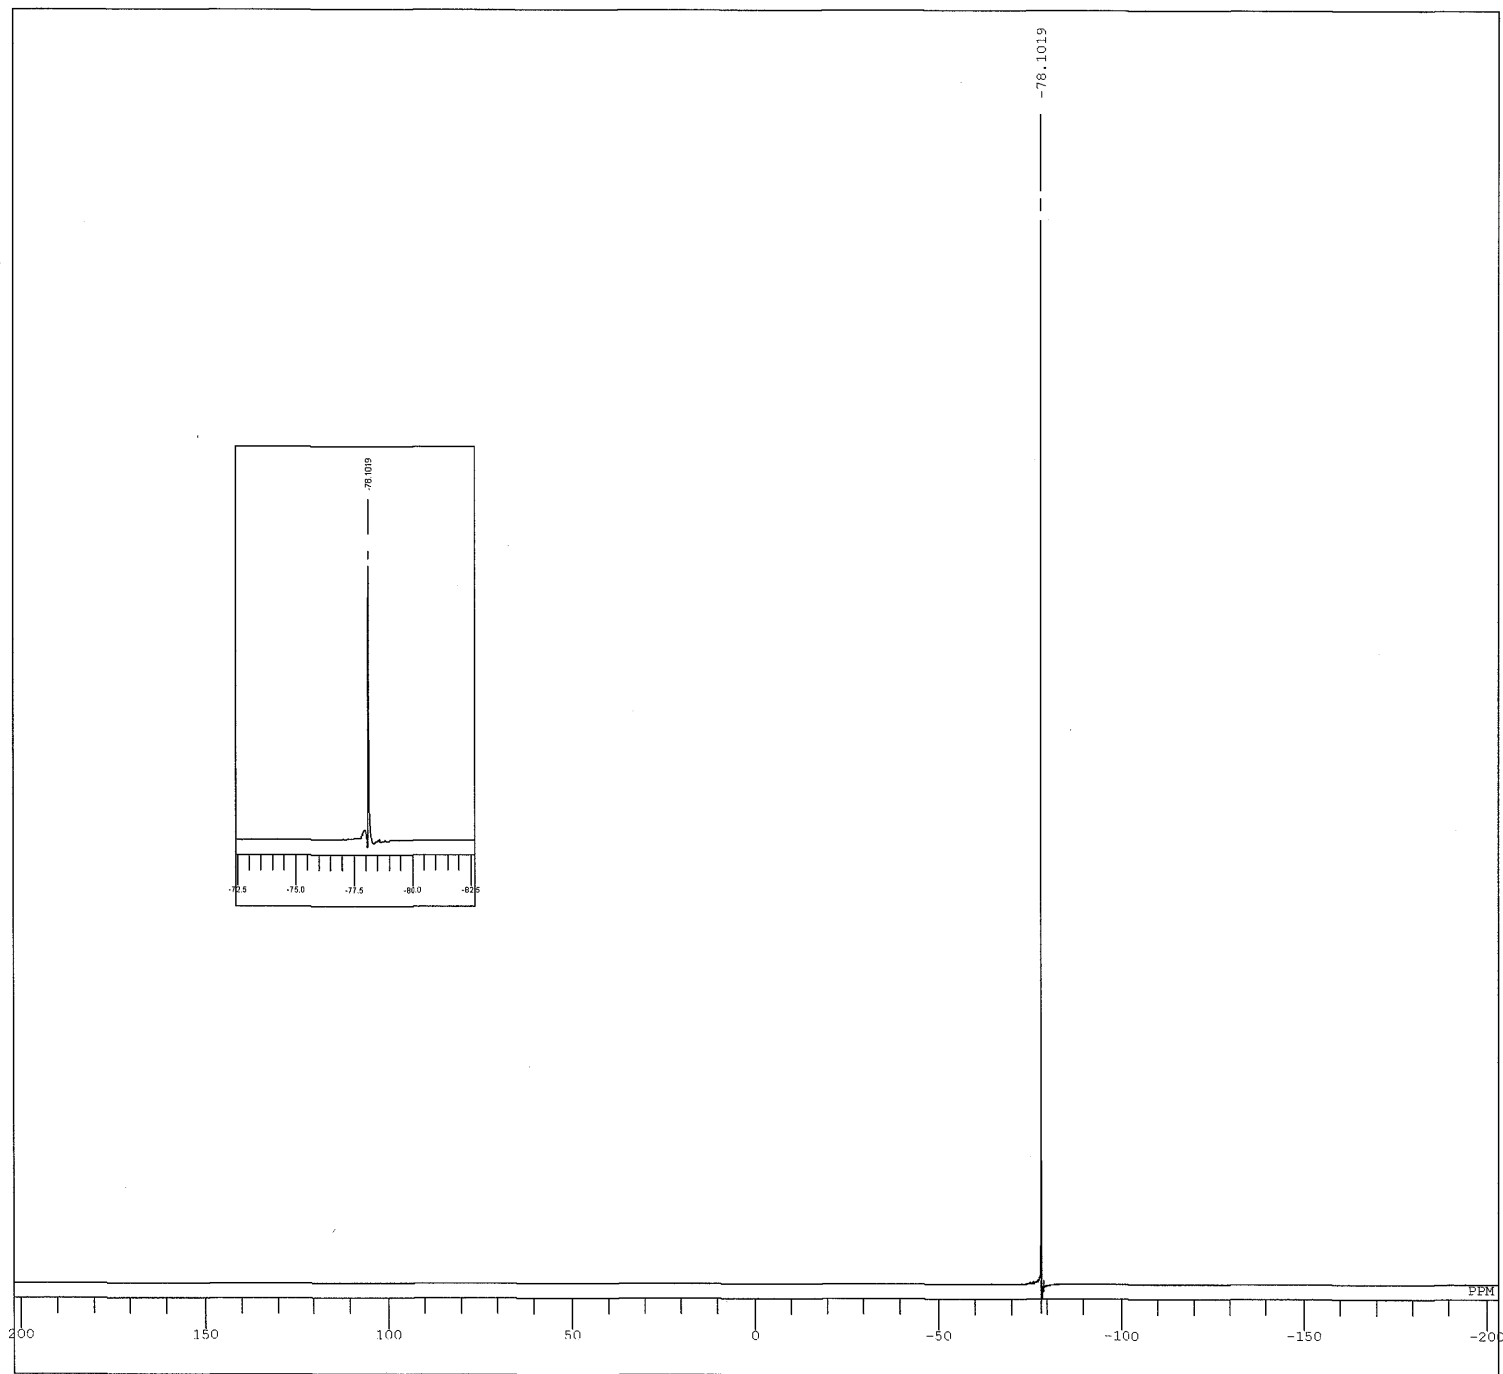

DFILE ozawa04-053\_1\_19F.jdf  
COMNT 3-MeBuOH  
DATIM 25-11-2013 13:52:14  
OBNUC 19F  
EXMOD proton.jpg  
OBFRQ 368.64 MHz  
OBSET 7.63 KHz  
OBFIN 2.85 Hz  
POINT 16384  
FREQU 186567.17 Hz  
SCANS 4  
ACQTM 0.0878 sec  
PD 5.0000 sec  
PW1 3.90 usec  
IRNUC 19F  
CTEMP 21.5 c  
SLVNT CDCL3  
EXREF -164.90 ppm  
BF 0.12 Hz  
RGAIN 44

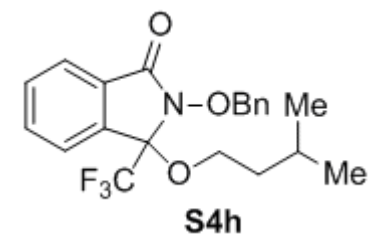



MeBuOH, OH

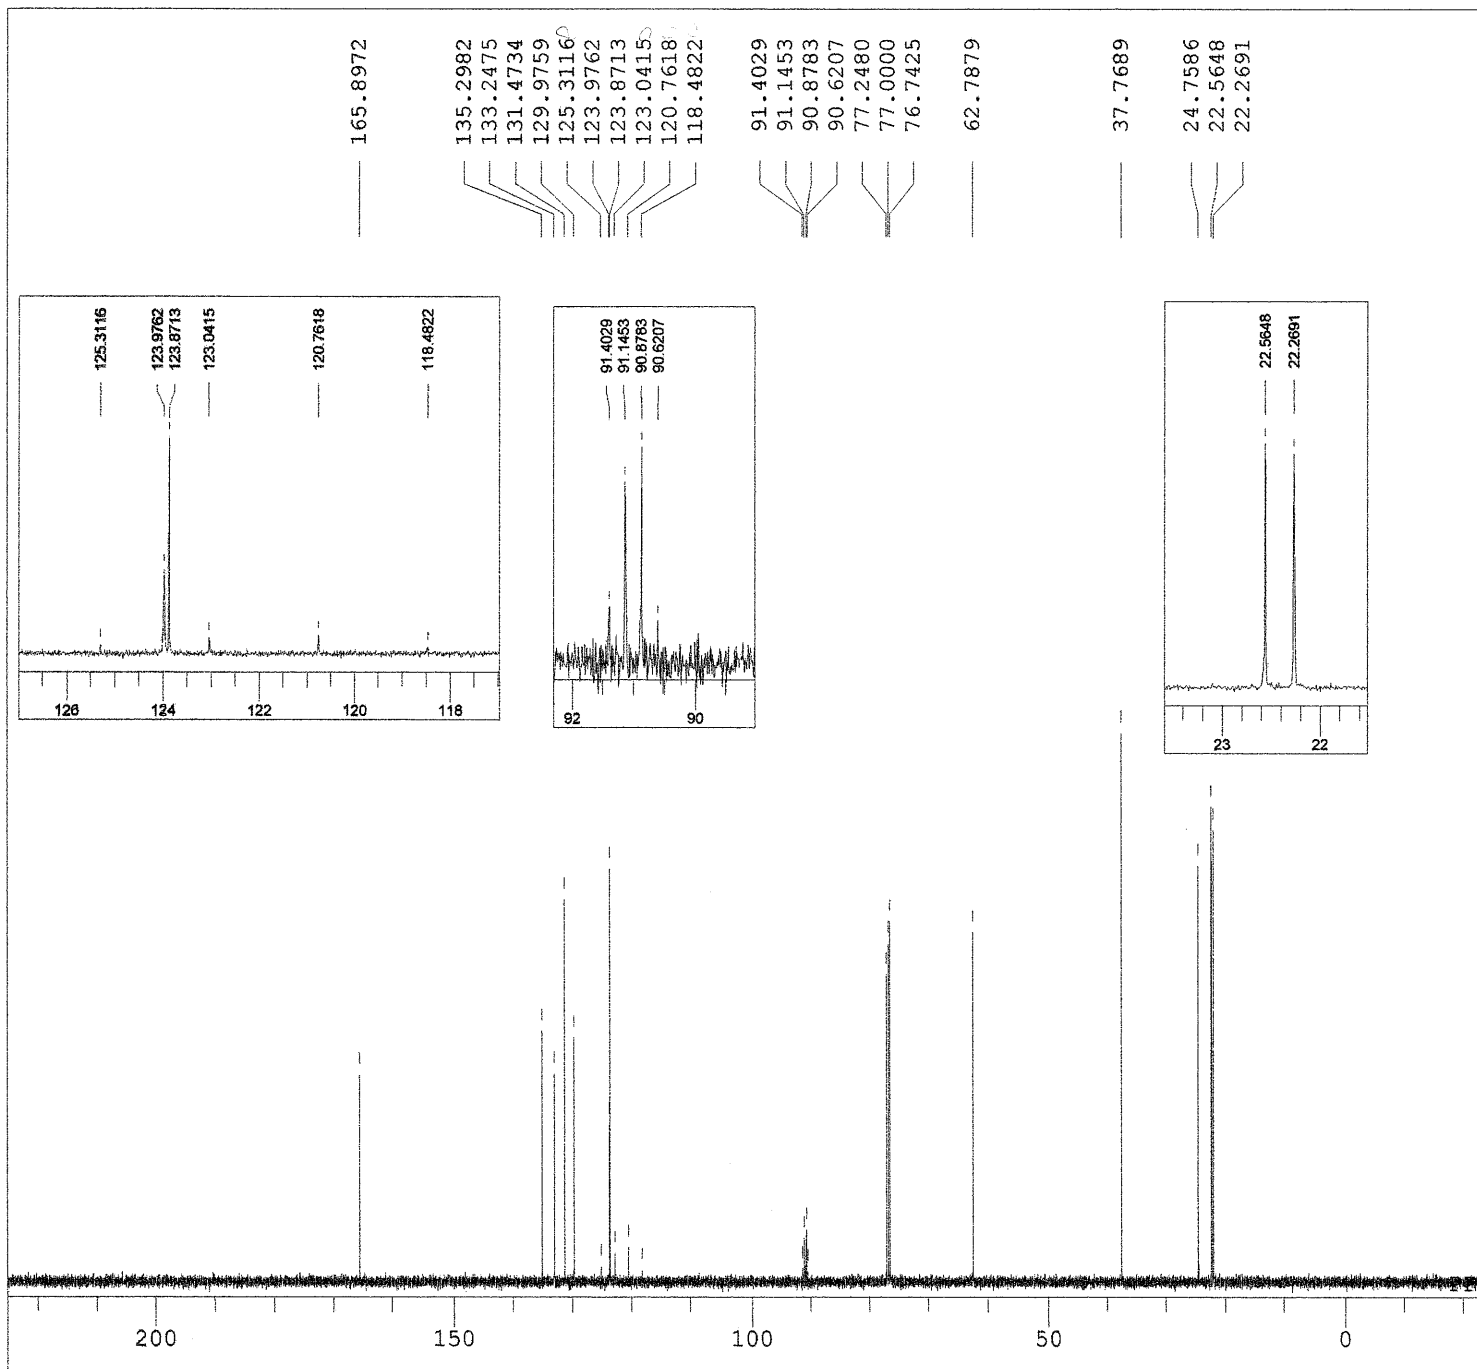

DFILE ozawa04-063rsm\_13C.jdf  
COMNT MeBuOH, OH  
DATIM 2014-01-21 12:35:34  
OBNUC 13C  
EXMOD carbon.jxp  
OBFRQ 125.77 MHz  
OBSET 7.87 KHz  
OBFIN 4.21 Hz  
POINT 32767  
FREQU 39308.18 Hz  
SCANS 100  
ACQTM 0.8336 sec  
PD 3.0000 sec  
PW1 3.40 usec  
IRNUC 1H  
CTEMP 21.7 c  
SLVNT CDCL3  
EXREF 77.00 ppm  
BF 0.12 Hz  
RGAIN 60

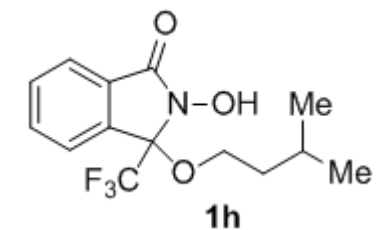

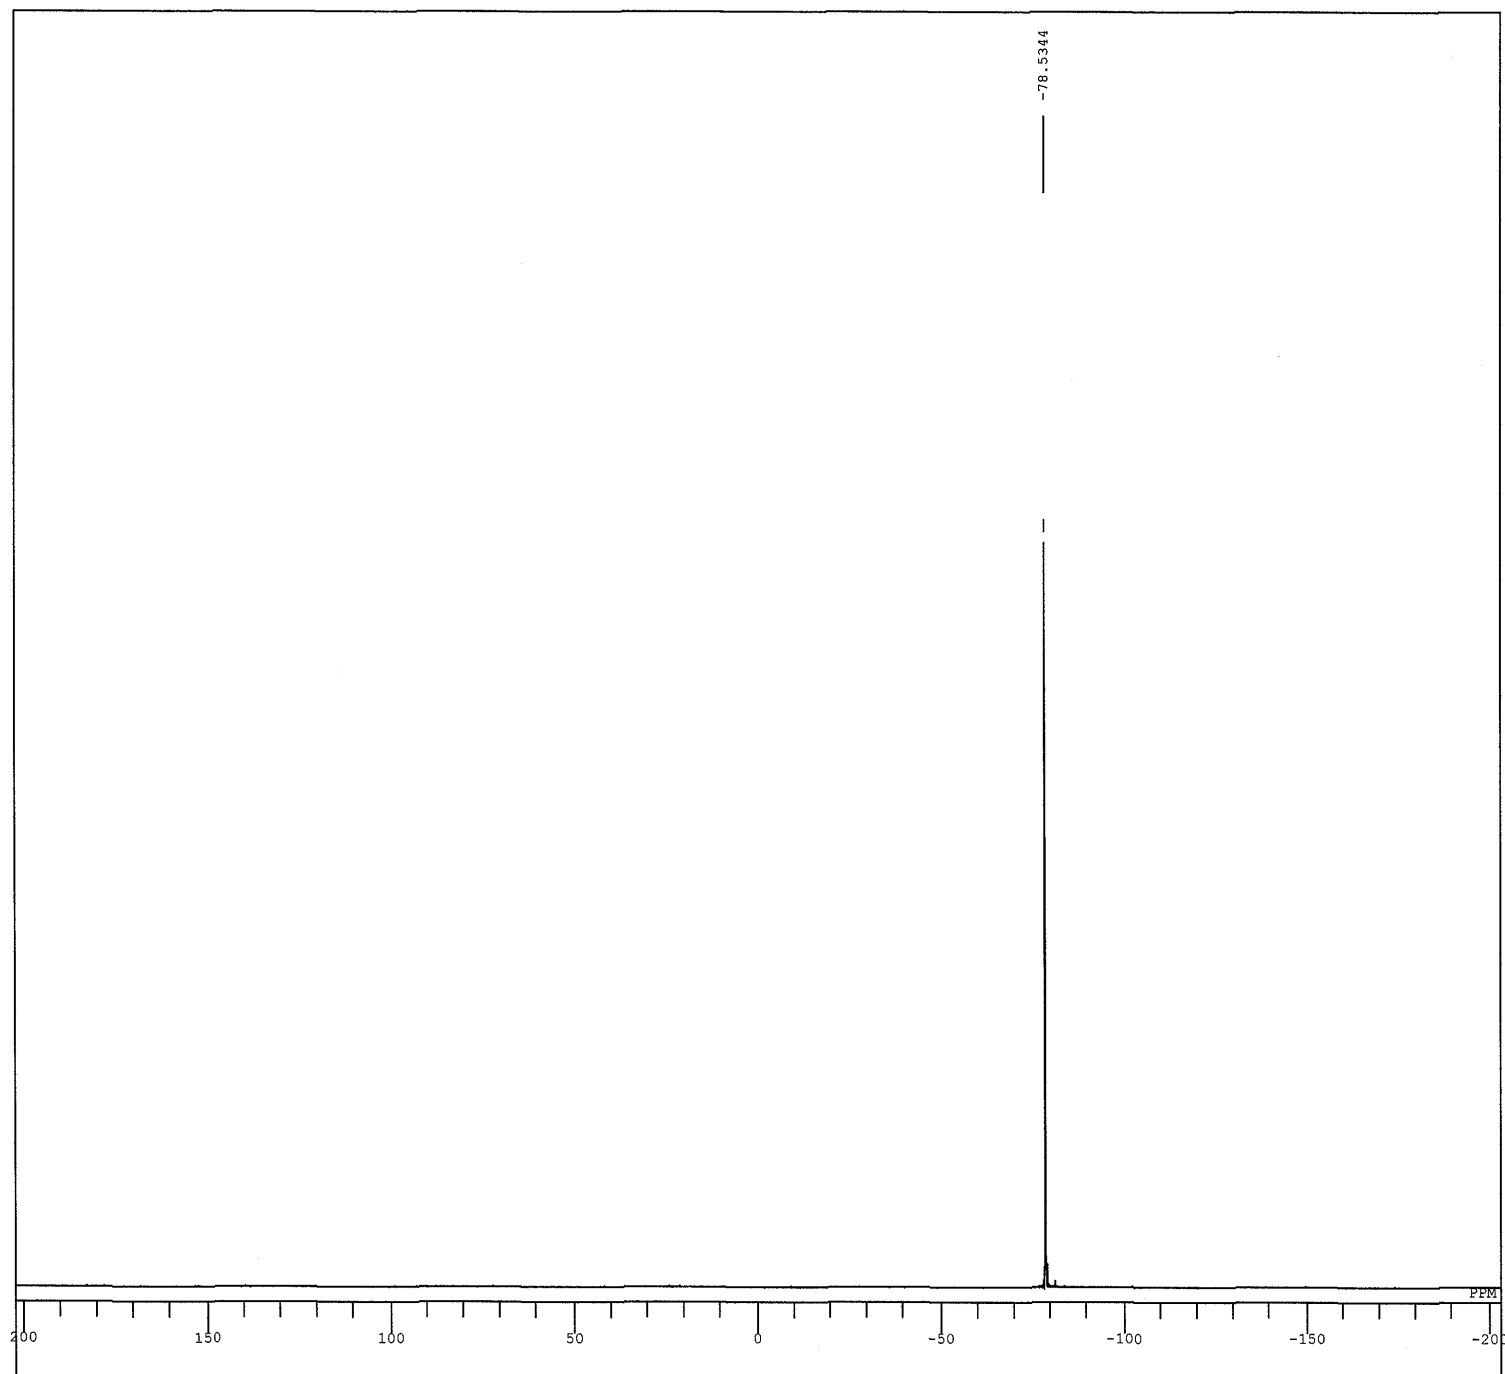

DFILE 1c\_ozawa04-63rsm\_19F.jdf  
COMNT MeBuOH, OH  
DATIM 21-01-2014 13:12:14  
OBNUC 19F  
EXMOD proton.jxp  
OBFRQ 368.64 MHz  
OBSET 7.63 KHz  
OBFIN 2.85 Hz  
POINT 16384  
FREQU 186567.17 Hz  
SCANS 4  
ACQTM 0.0878 sec  
PD 5.0000 sec  
PW1 3.90 usec  
IRNUC 19F  
CTEMP 20.9 c  
SLVNT CDCL3  
EXREF -164.90 ppm  
BF 0.12 Hz  
RGAIN 42

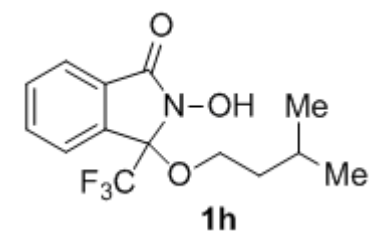

MeBuOH

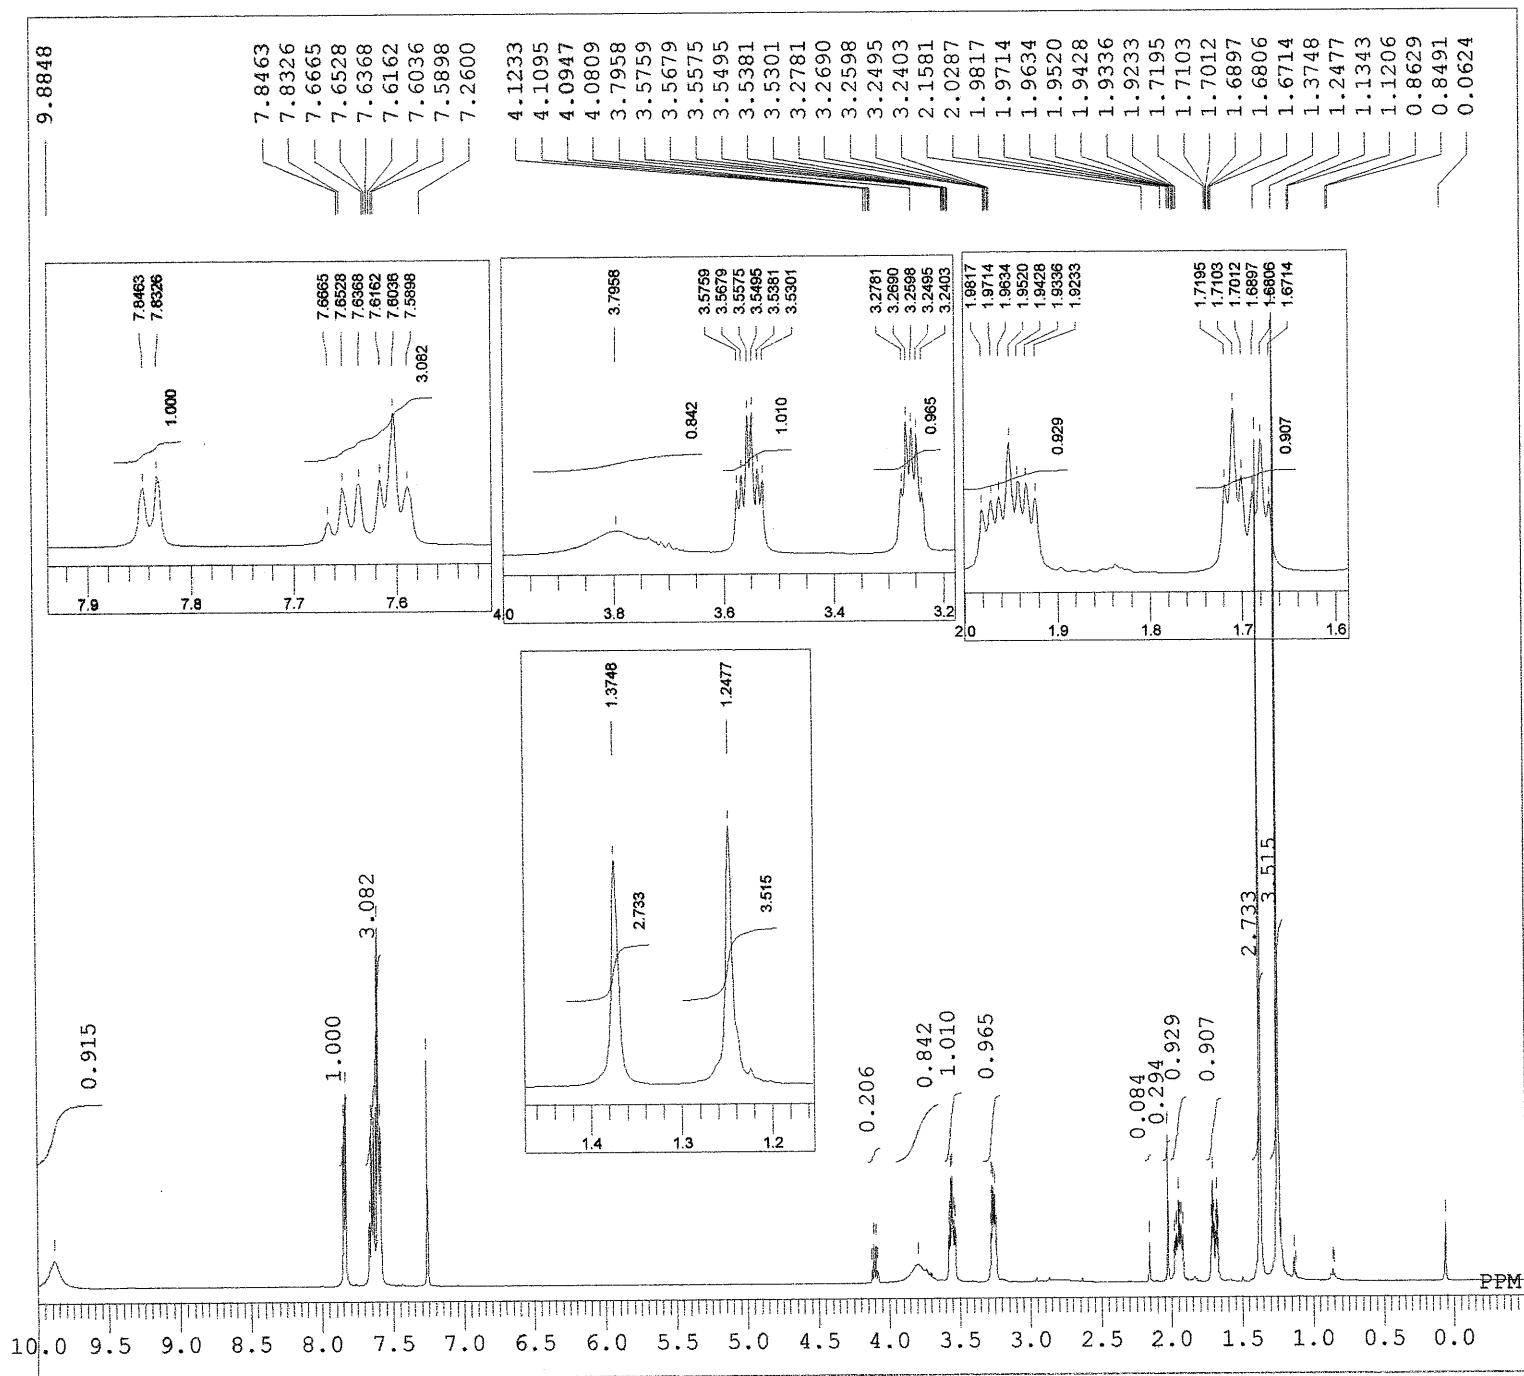

DFILE ozawa04-046.als  
COMNT MeBuOH  
DATIM 2013-11-16 17:26:53  
OBNUC 1H  
EXMUD proton.jxp  
OBFREQ 500.16 MHz  
OBSET 2.41 KHz  
OBFIN 6.01 Hz  
POINT 13107  
FREQU 7507.51 Hz  
SCANS 4  
ACQTM 1.7459 sec  
PD 5.0000 sec  
PW1 5.55 usec  
IRNUC 1H  
CTEMP 22.8 c  
SLVNT CDCL3  
EXREF 7.26 ppm  
BF 1.00 Hz  
RGAIN 30

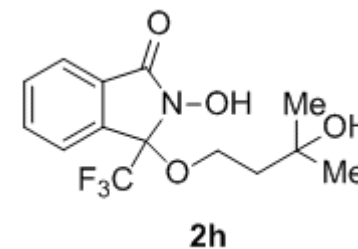

MeBuOH, [O]

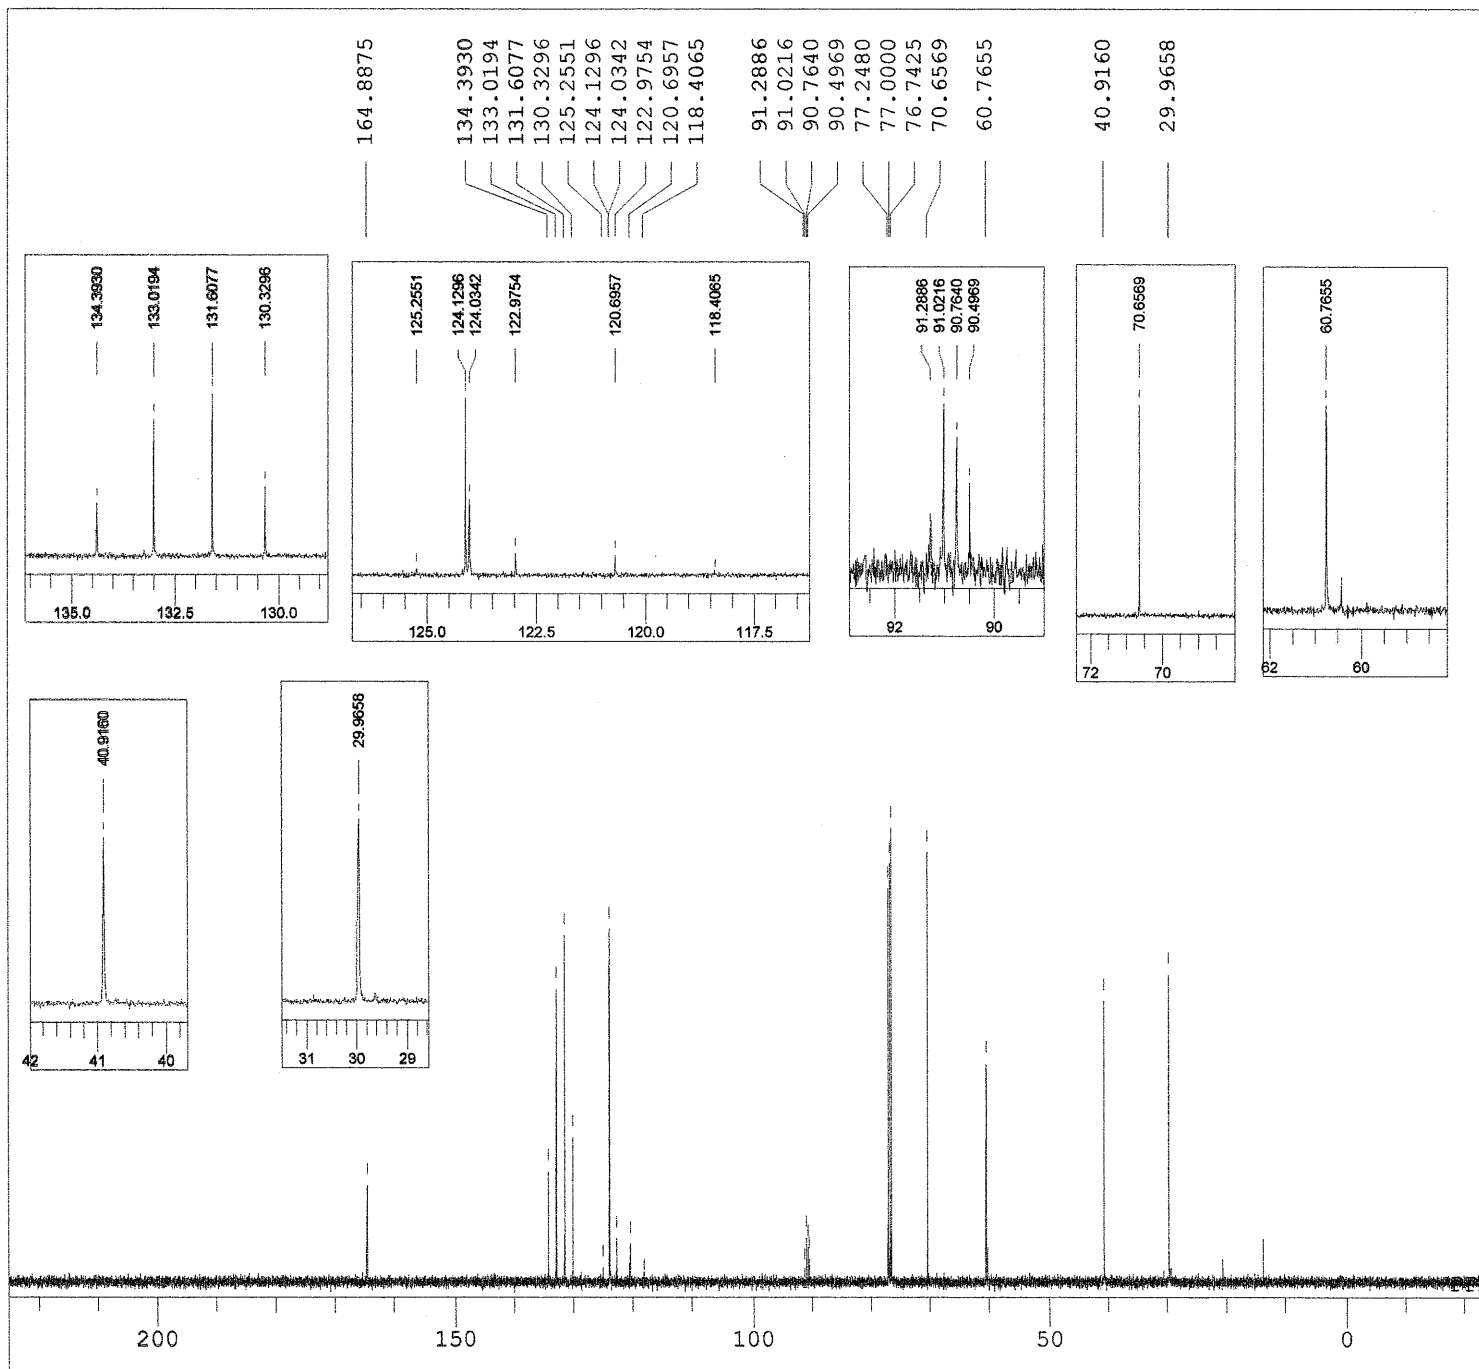

DFILE ozawa04-046\_13C.als  
COMNT MeBuOH, [O]  
DATIM 2013-11-16 18:28:22  
OBNUC 13C  
EXMOD carbon.jxp  
OBFRQ 125.77 MHz  
OBSET 7.87 KHz  
OBFIN 4.21 Hz  
POINT 26214  
FREQU 31446.54 Hz  
SCANS 160  
ACQTM 0.8336 sec  
PD 3.0000 sec  
PW1 3.40 usec  
IRNUC 1H  
CTEMP 23.5 c  
SLVNT CDCL3  
EXREF 77.00 ppm  
BF 0.12 Hz  
RGAIN 60

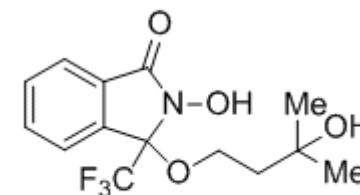

2h



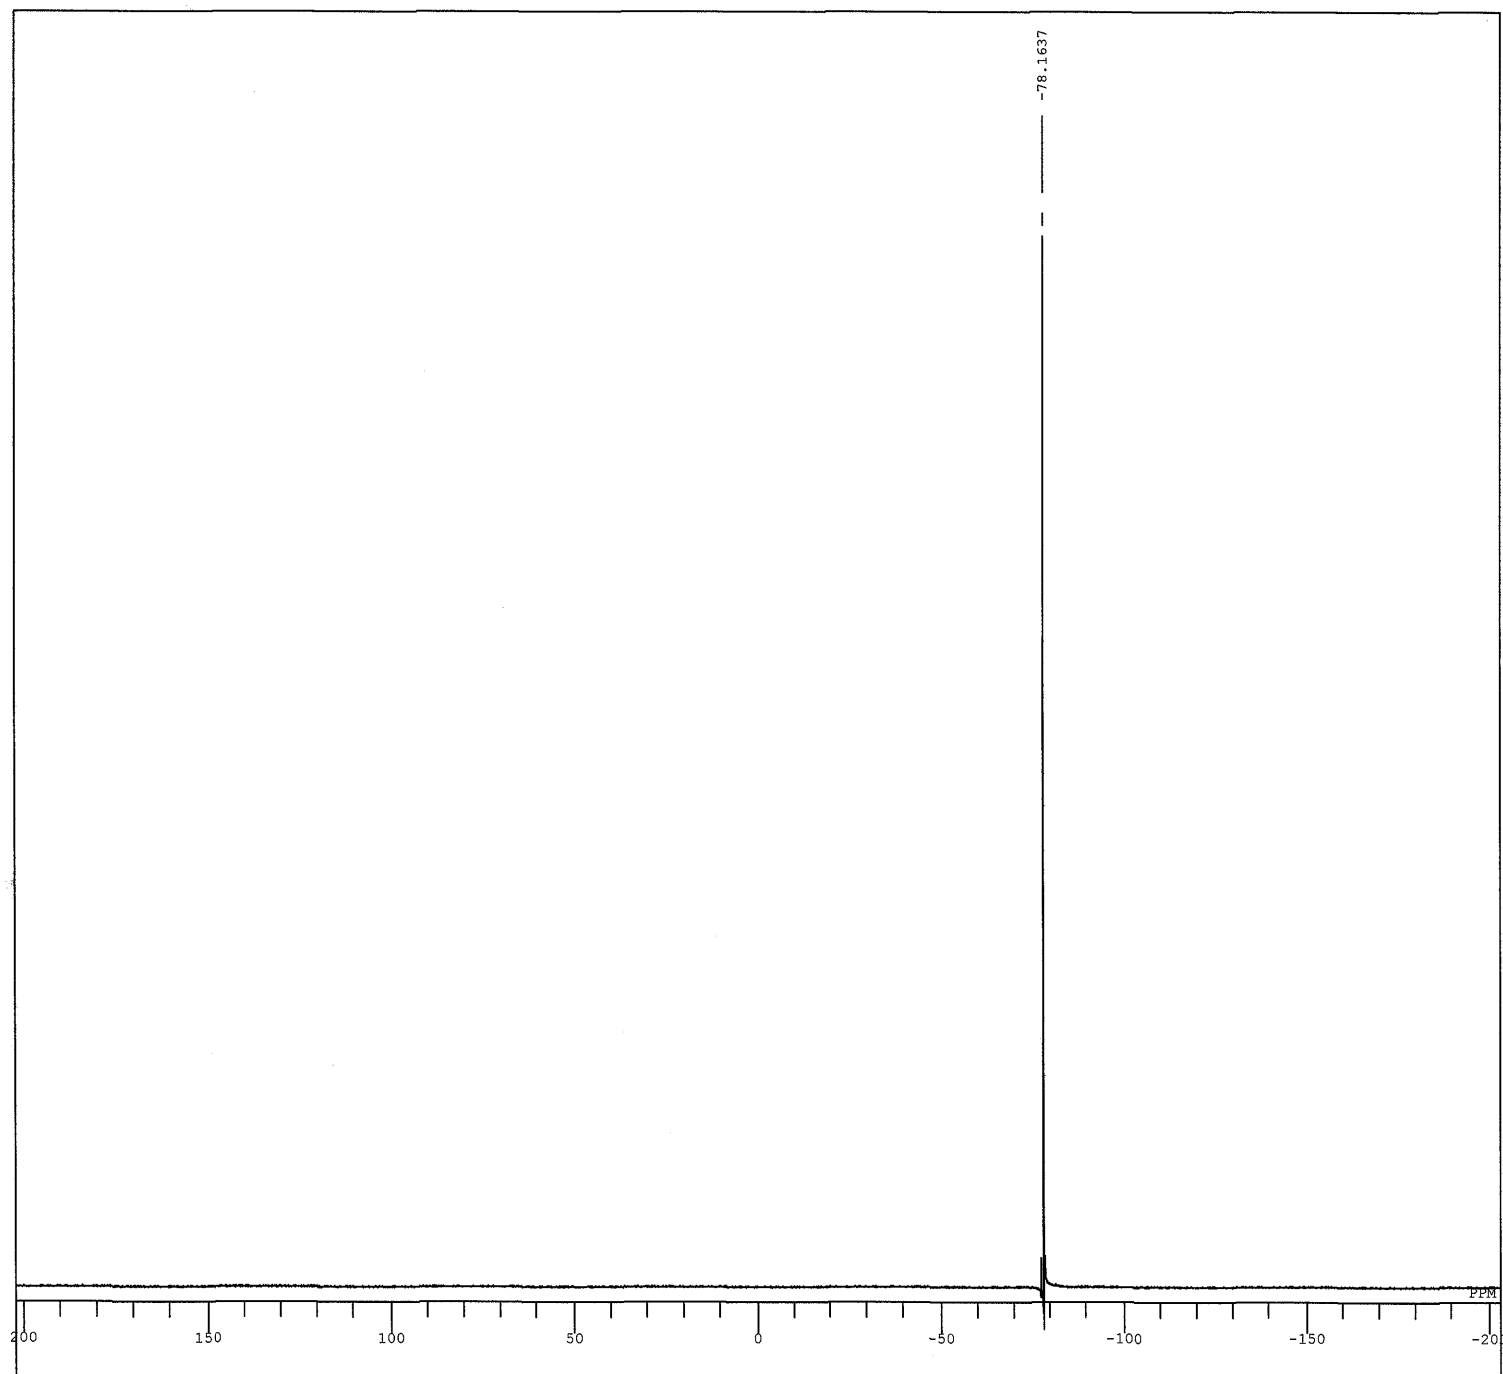

DFILE 2c\_ozawa04-095\_1\_19F.jdf  
COMNT MeBuOH, [0]  
DATIM 27-01-2014 21:02:12  
OBNUC 19F  
EXMOD proton.jxp  
OBFREQ 368.64 MHz  
OBSET 7.63 KHz  
OBFIN 2.85 Hz  
POINT 16384  
FREQU 186567.17 Hz  
SCANS 4  
ACQTM 0.0878 sec  
PD 5.0000 sec  
PW1 3.90 usec  
IRNUC 19F  
CTEMP 21.1 c  
SLVNT CDCL3  
EXREF -164.90 ppm  
BF 0.12 Hz  
RGAIN 48

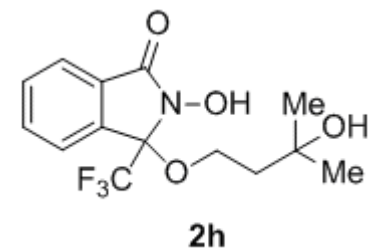

CyEtOH

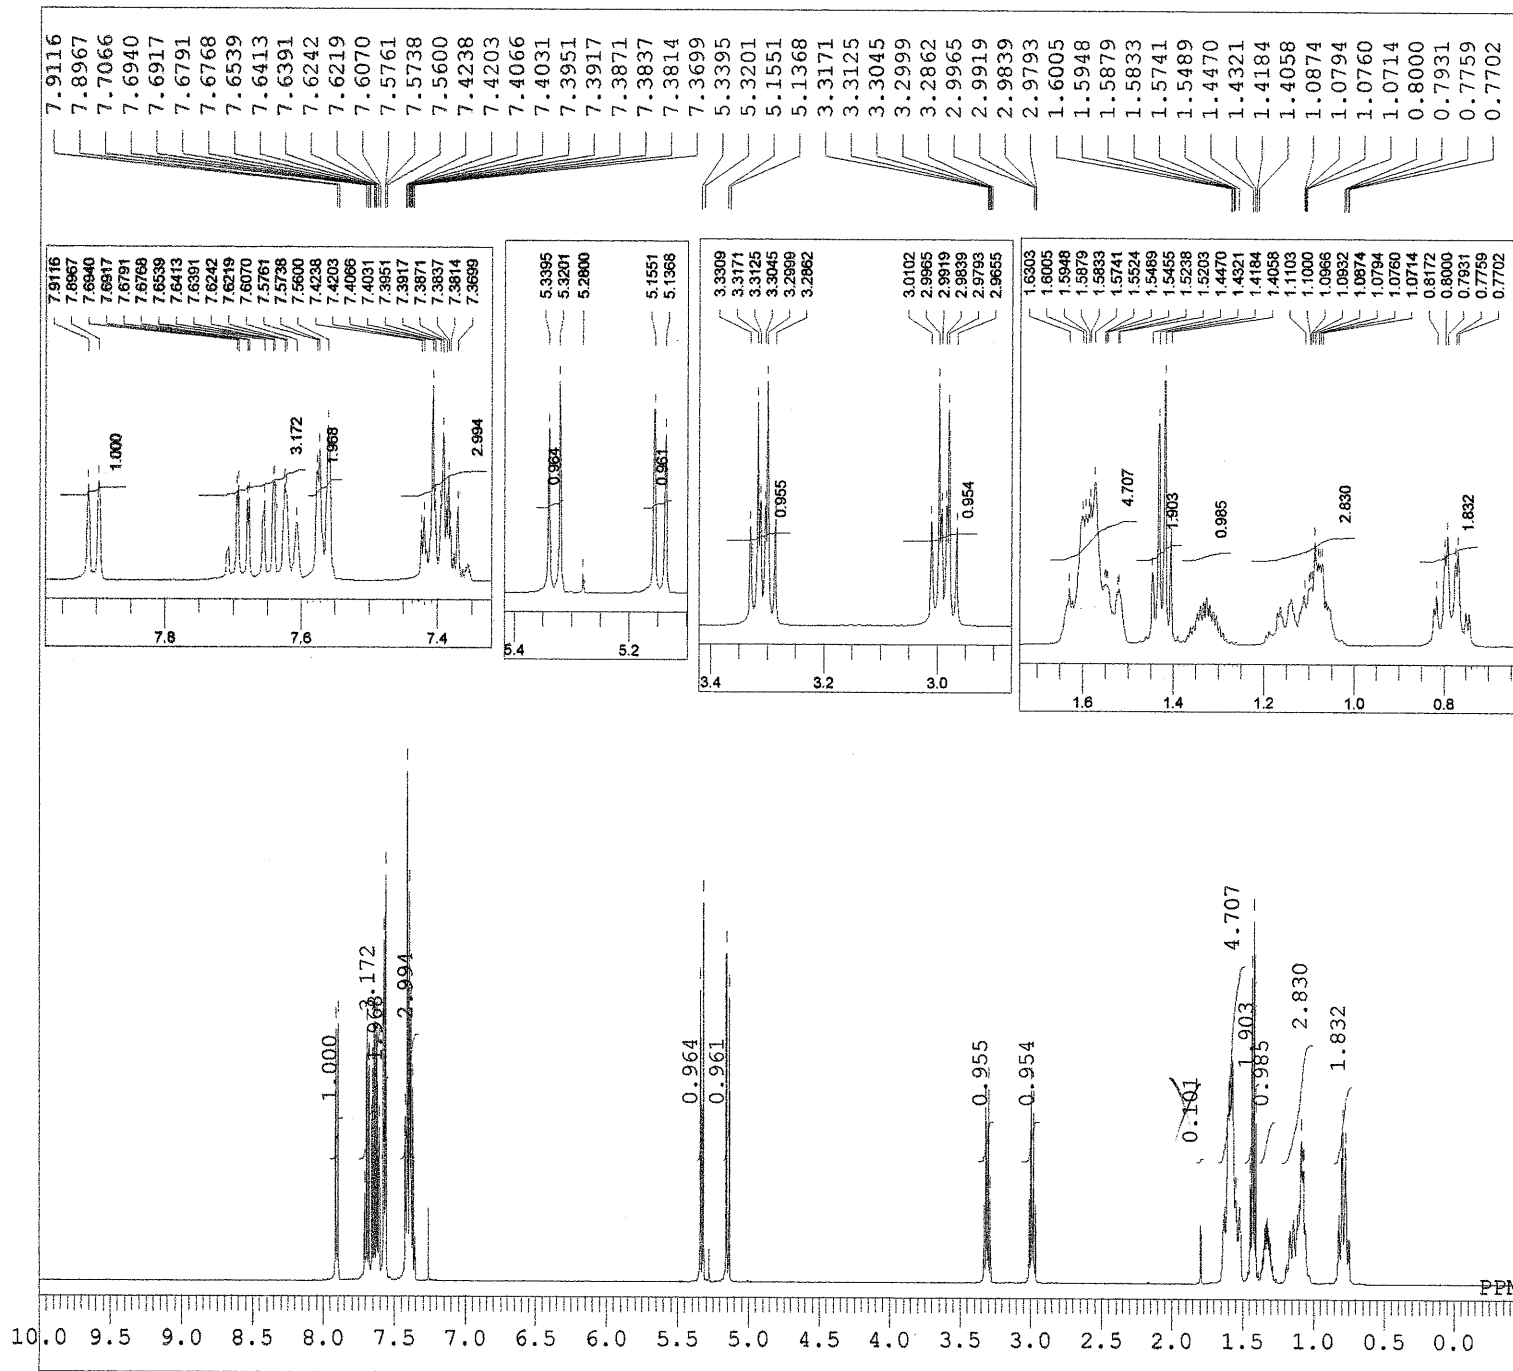

DFILE ozawa04-050\_1H.jdf  
 COMNT CyEtOH  
 DATIM 2013-11-25 14:17:48  
 OBNUC 1H  
 EXMOD proton.jxp  
 OBFREQ 500.16 MHz  
 OBSET 2.41 KHz  
 OBFIN 6.01 Hz  
 POINT 16384  
 FREQU 9384.38 Hz  
 SCANS 4  
 ACQTM 1.7459 sec  
 PD 5.0000 sec  
 PW1 5.55 usec  
 IRNUC 1H  
 CTEMP 22.8 c  
 SLVNT CDCL3  
 EXREF 7.26 ppm  
 BF 0.12 Hz  
 RGAIN 26

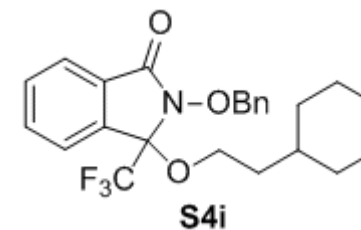

CyEtOH

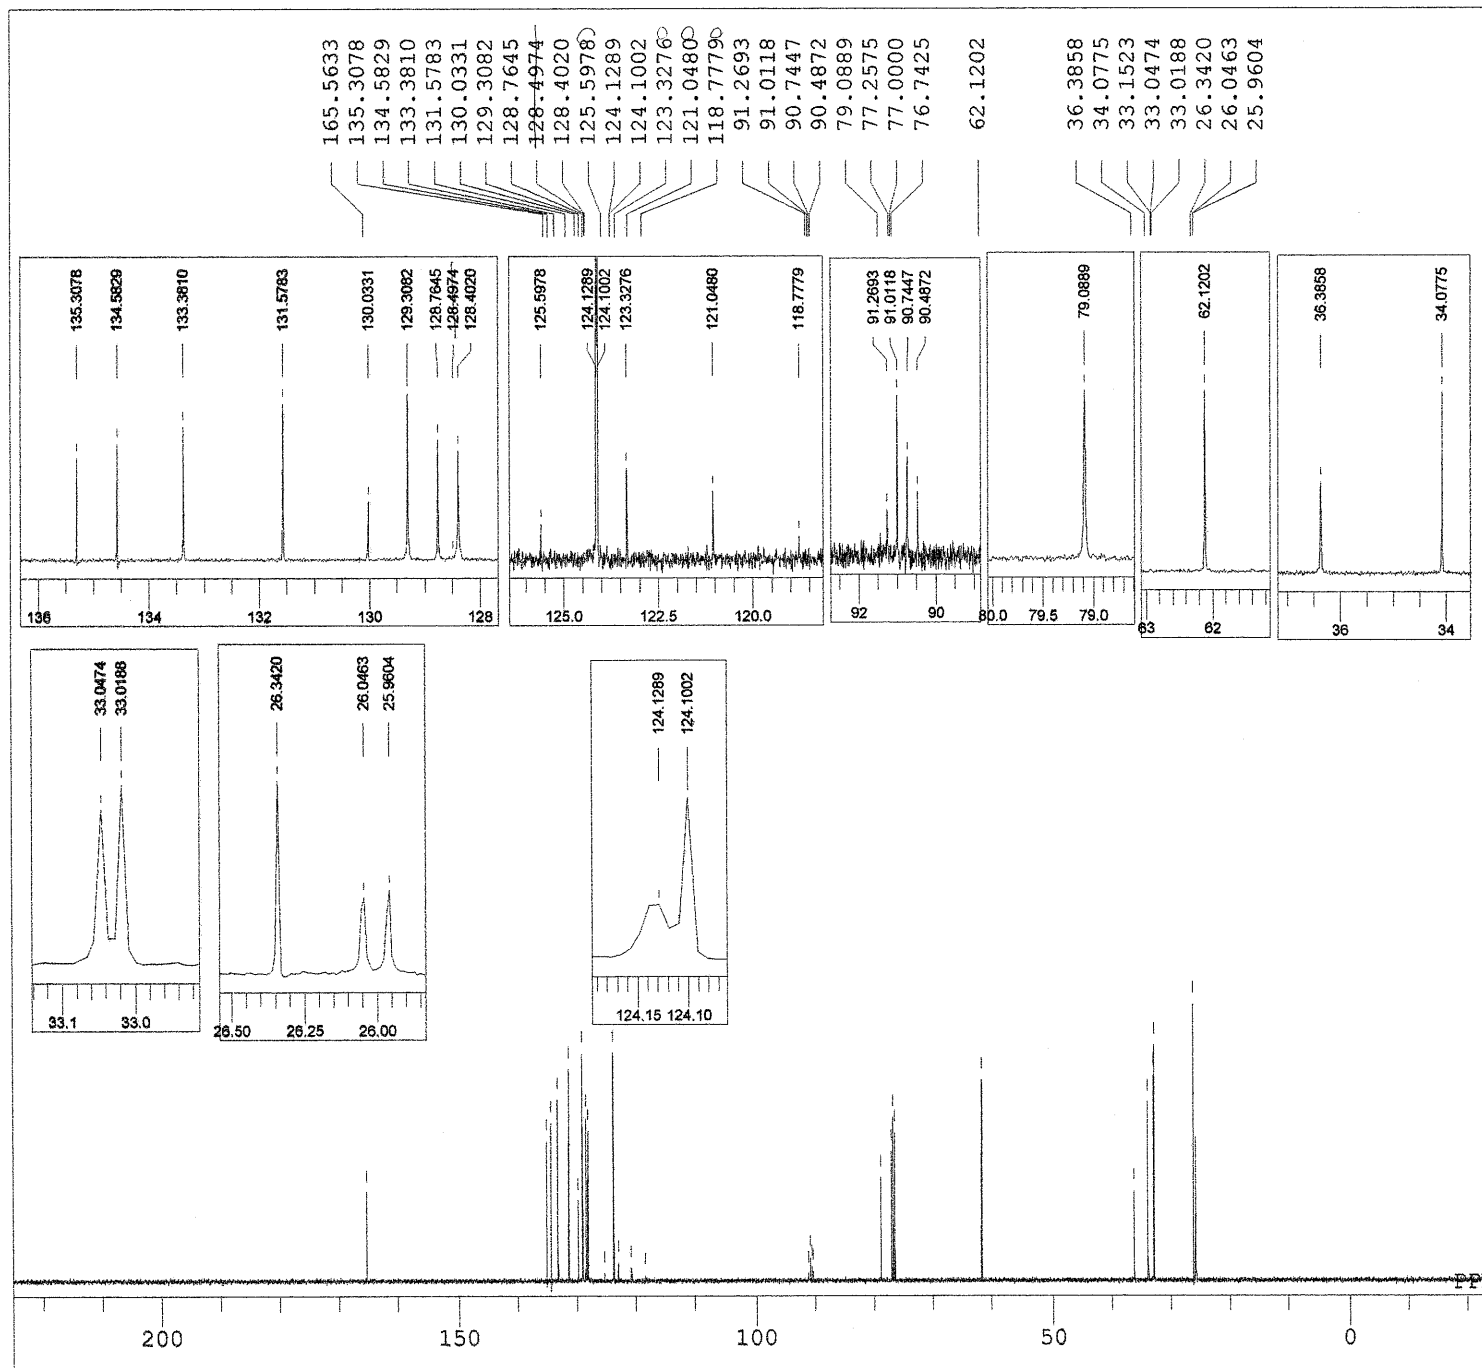

DFILE ozawa04-050\_13C.jdf  
COMNT CyEtOH  
DATIM 2013-11-25 17:16:21  
OBNUC 13C  
EXMOD carbon.jxp  
OBFRQ 125.77 MHz  
OBSET 7.87 KHz  
OBFIN 4.21 Hz  
POINT 32767  
FREQU 39308.18 Hz  
SCANS 140  
ACQTM 0.8336 sec  
PD 3.0000 sec  
PW1 3.40 usec  
IRNUC 1H  
CTEMP 23.0 c  
SLVNT CDCL3  
EXREF 77.00 ppm  
BF 0.12 Hz  
RGAIN 60

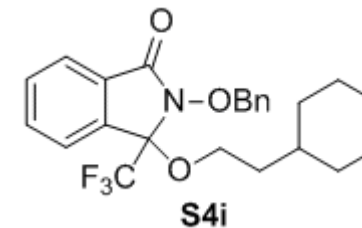

CyEtOH

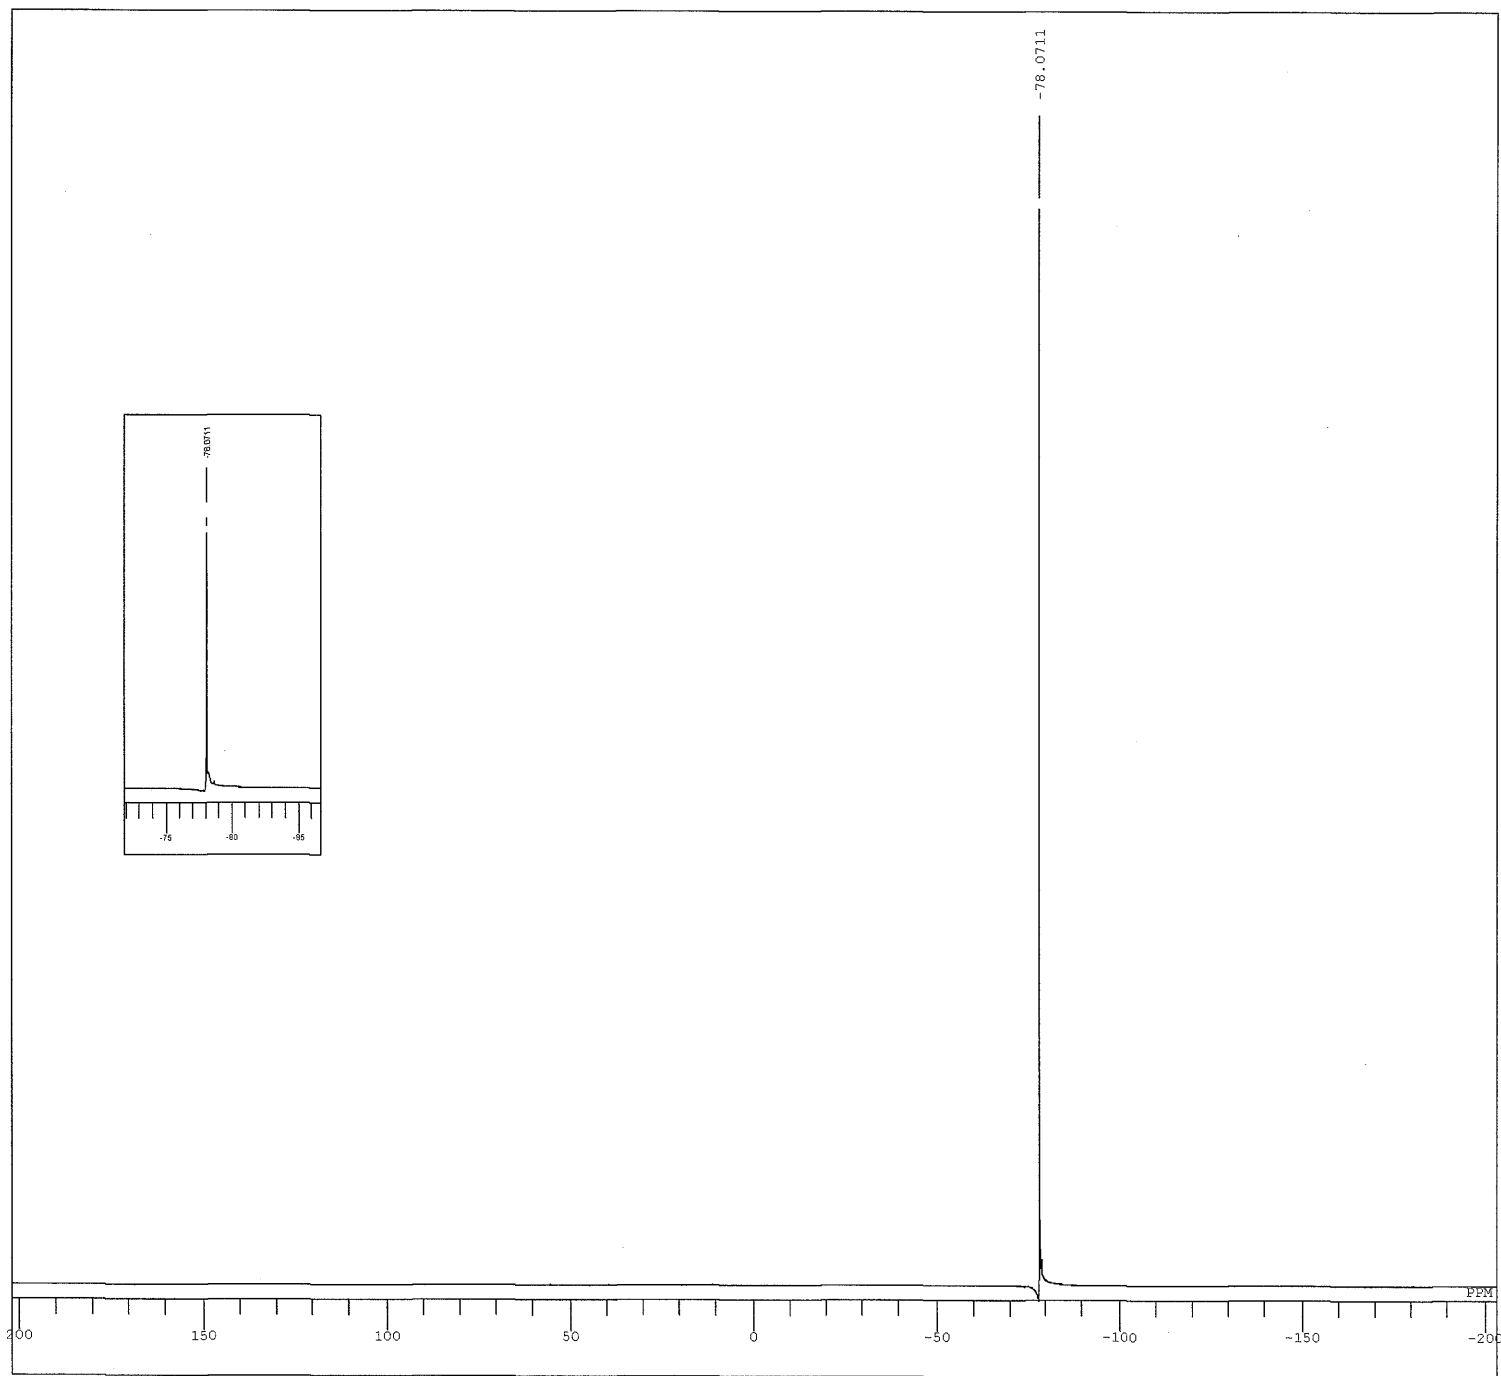

DFILE ozawa04-050\_19F.jdf  
COMNT CyEtOH  
DATIM 25-11-2013 13:45:34  
OBNUC 19F  
EXMOD proton.jxp  
OBFRQ 368.64 MHz  
OBSET 7.63 KHz  
OBFIN 2.85 Hz  
POINT 16384  
FREQU 186567.17 Hz  
SCANS 4  
ACQTM 0.0878 sec  
PD 5.0000 sec  
PW1 3.90 usec  
IRNUC 19F  
CTEMP 21.2 c  
SLVNT CDCL3  
EXREF -164.90 ppm  
BF 0.12 Hz  
RGAIN 46

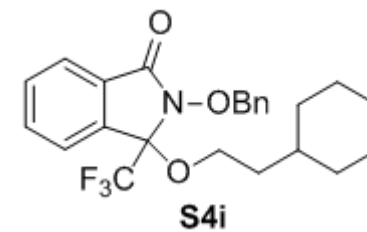

column, CyEtOH

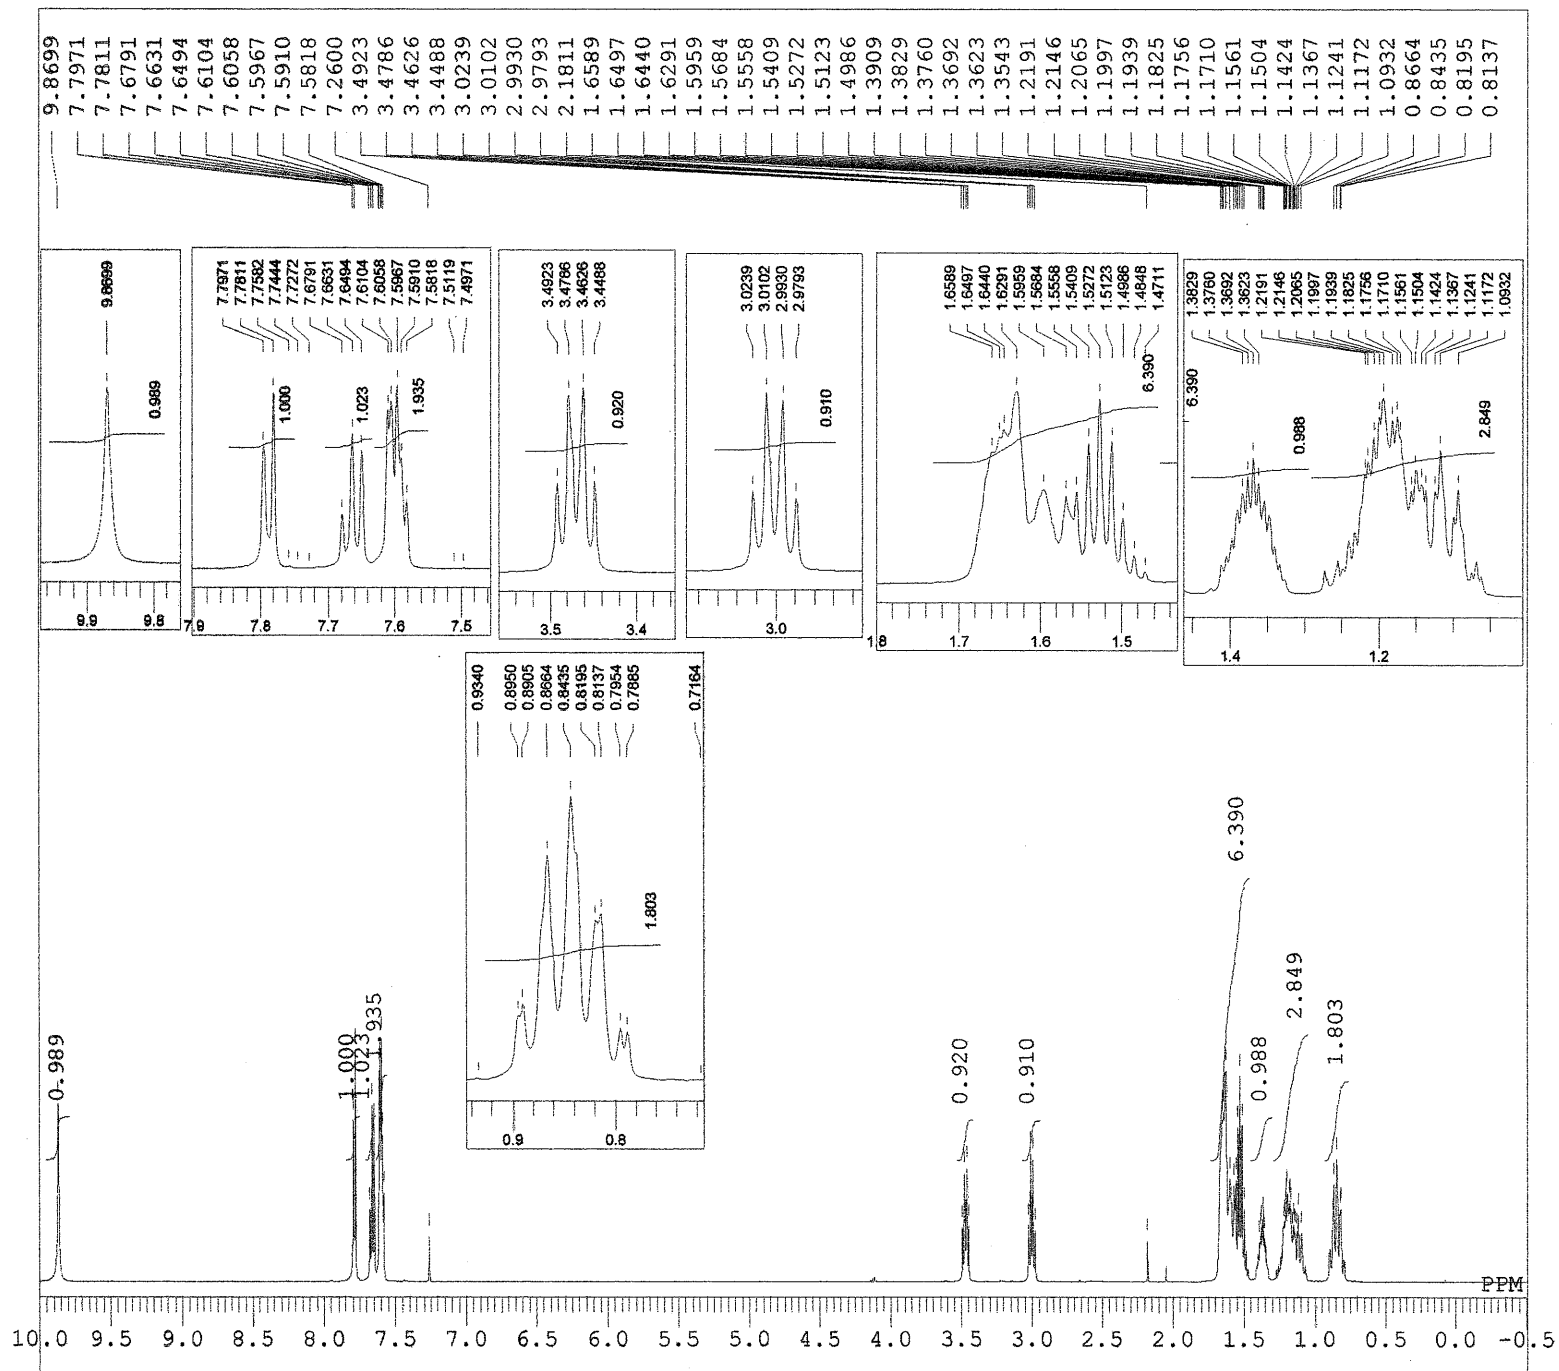

DFILE ozawa04-056\_1\_1h.jdf  
 COMNT column, CyEtOH  
 DATIM 2013-11-29 14:27:28  
 OBNUC 1H  
 EXMOD proton.jxp  
 OBFRQ 500.16 MHz  
 OBSET 2.41 KHz  
 OBFIN 6.01 Hz  
 POINT 16384  
 FREQU 9384.38 Hz  
 SCANS 4  
 ACQTM 1.7459 sec  
 PD 5.0000 sec  
 PW1 5.55 usec  
 IRNUC 1H  
 CTEMP 22.7 c  
 SLVNT CDCL3  
 EXREF 7.26 ppm  
 BF 0.12 Hz  
 RGAIN 30

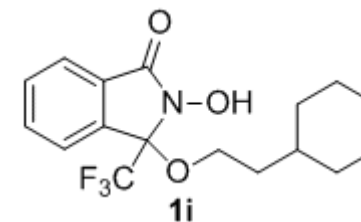

CyEtOH

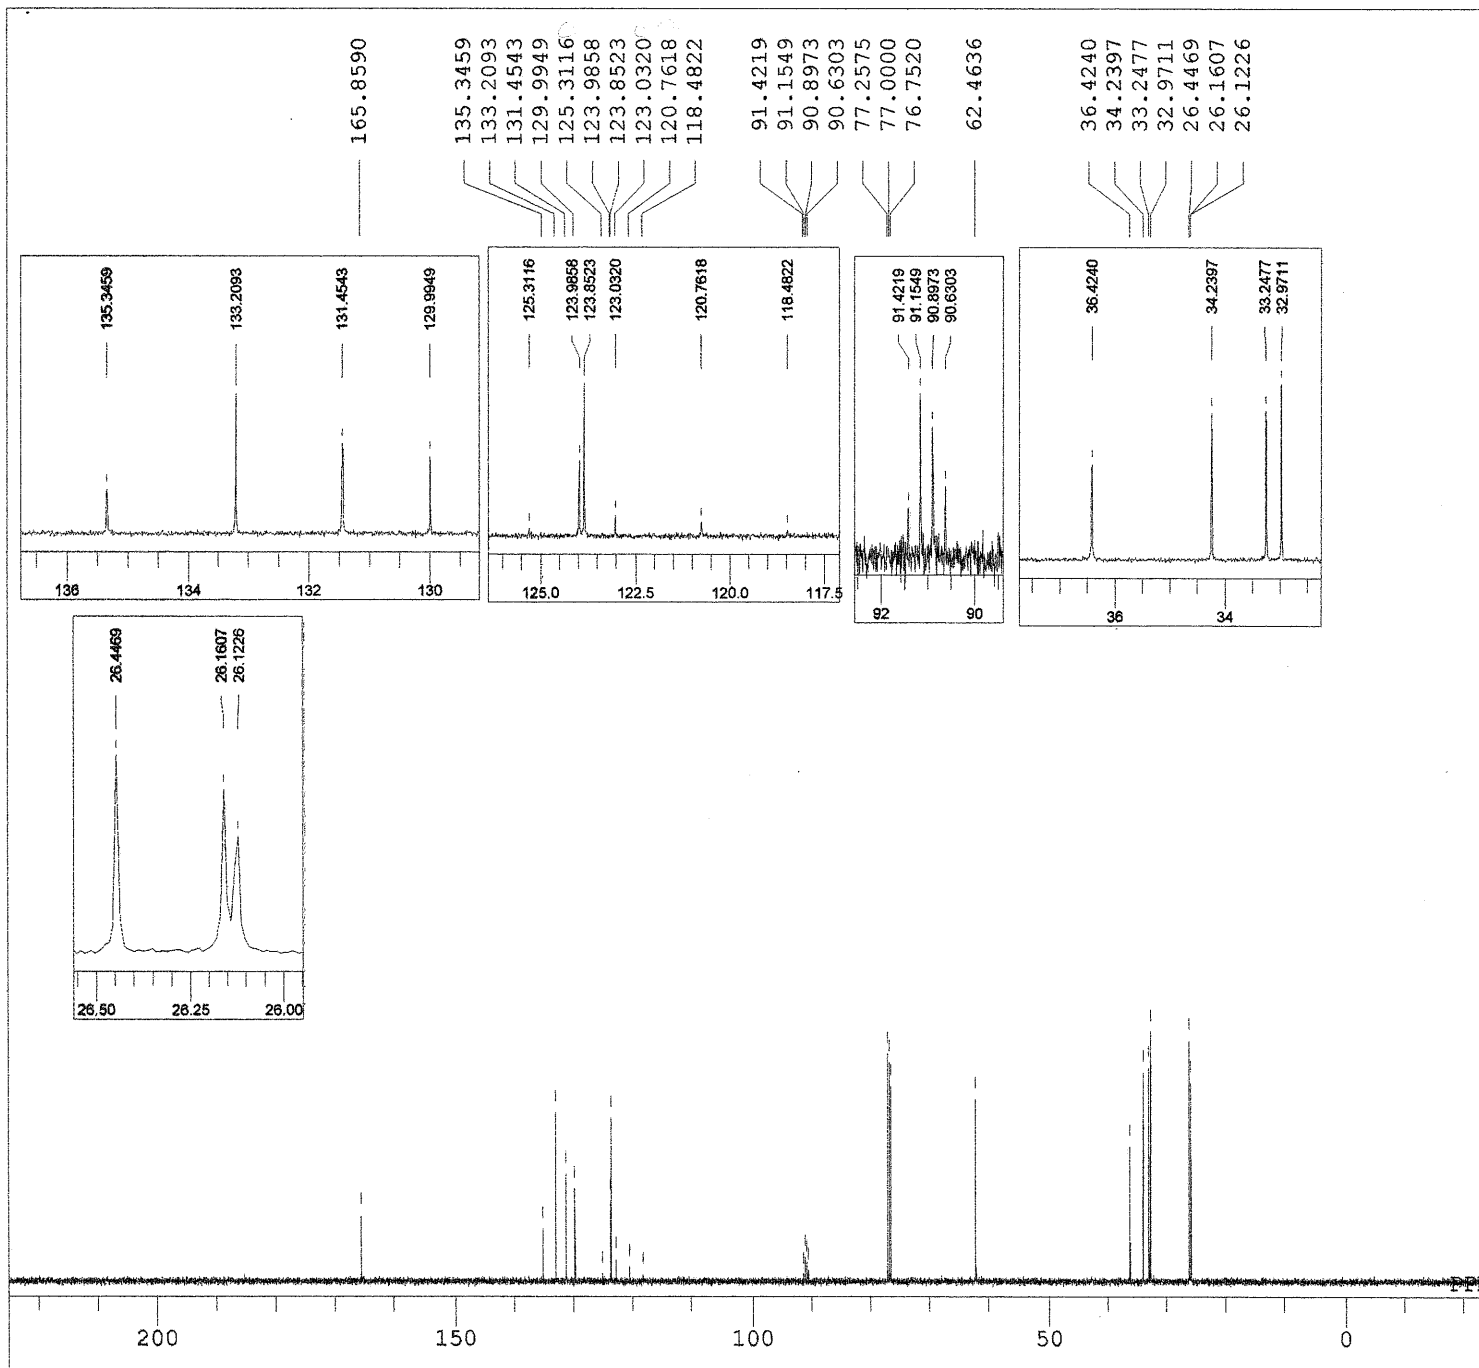

DFILE ozawa04-056\_1\_13C.jdf  
COMNT CyEtOH  
DATIM 2013-11-29 14:28:32  
OBNUC 13C  
EXMOD carbon.jxp  
OBFRQ 125.77 MHz  
OBSET 7.87 KHz  
OBFIN 4.21 Hz  
POINT 32767  
FREQU 39308.18 Hz  
SCANS 124  
ACQTM 0.8336 sec  
PD 3.0000 sec  
PW1 3.40 usec  
IRNUC 1H  
CTEMP 22.8 c  
SLVNT CDCL3  
EXREF 77.00 ppm  
BF 0.12 Hz  
RGAIN 60

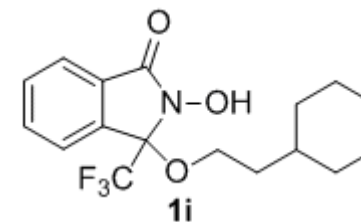

column, CyEtOH

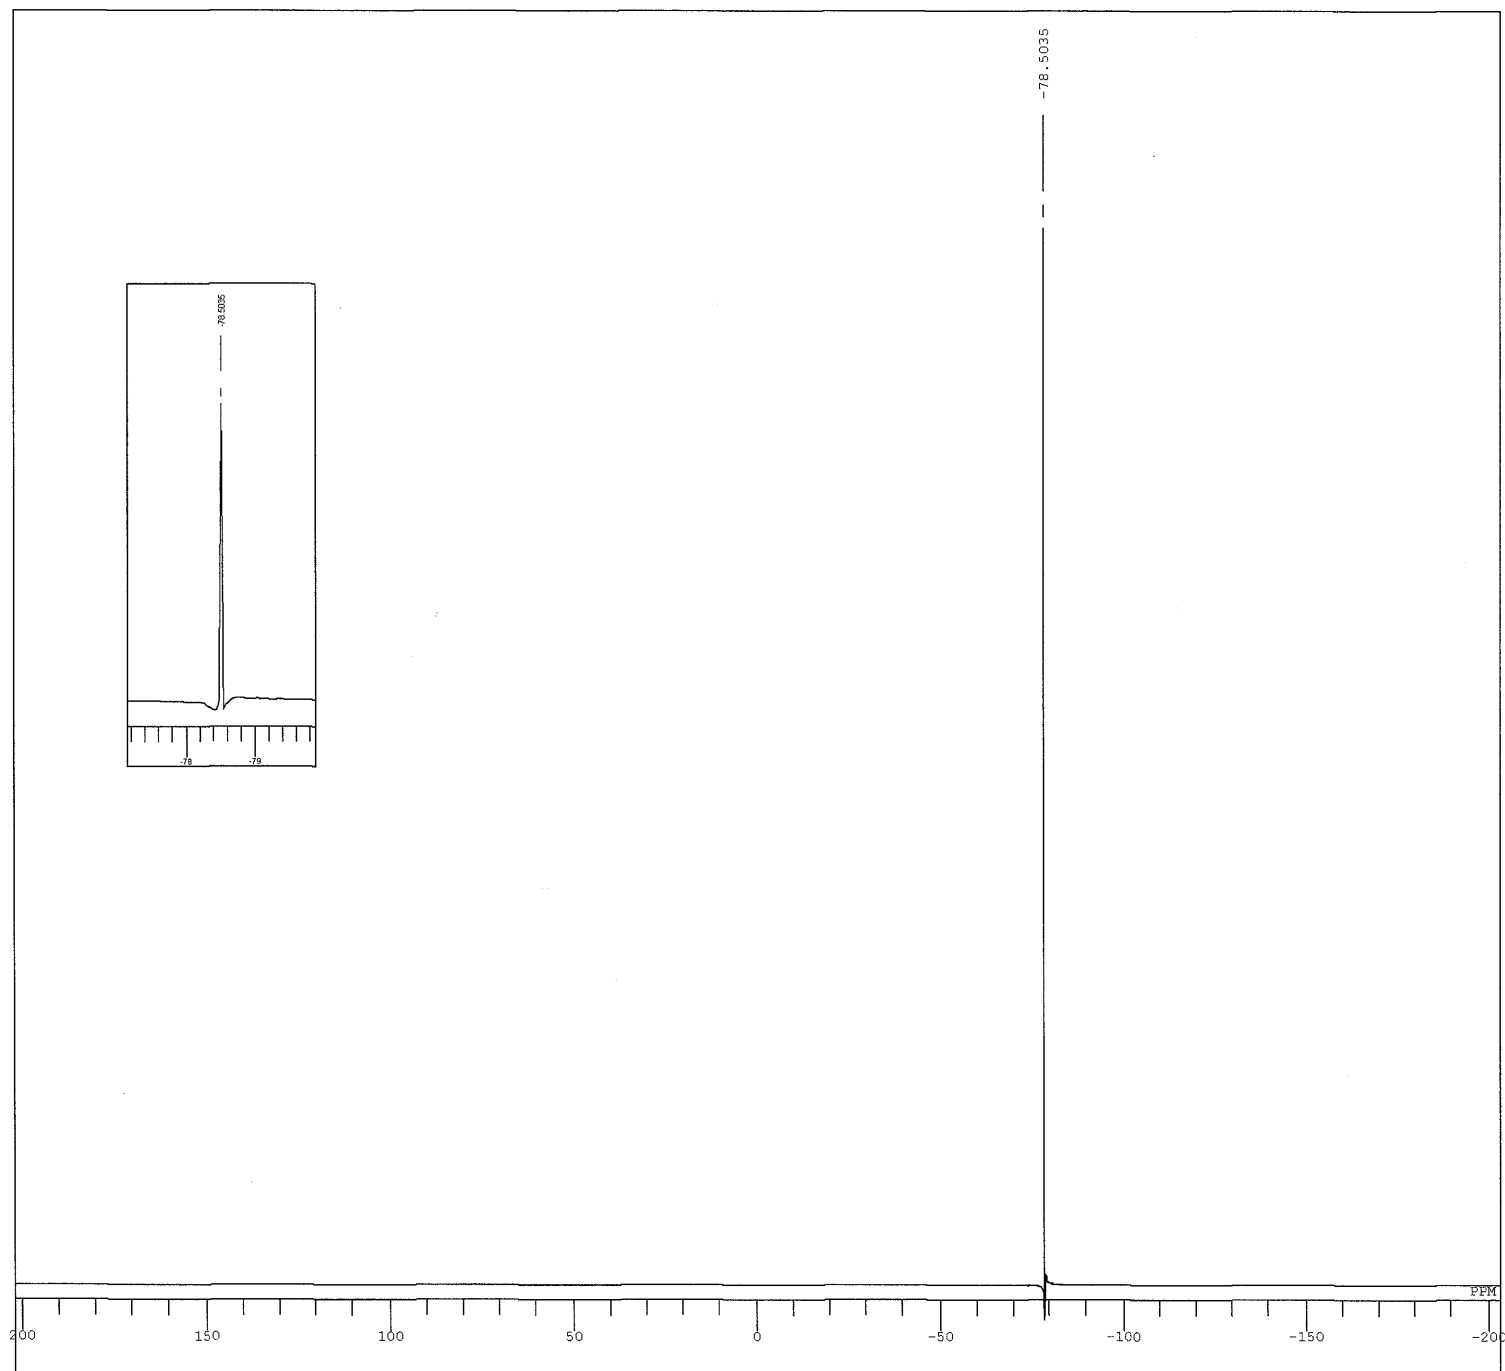

DFILE ozawa04-056\_1\_19F.jdf  
COMNT column, CyEtOH  
DATIM 29-11-2013 14:25:48  
OBNUC 19F  
EXMOD proton.jxp  
OBFRQ 368.64 MHz  
OBSET 7.63 KHz  
OBFIN 2.85 Hz  
POINT 16384  
FREQU 186567.17 Hz  
SCANS 4  
ACQTM 0.0878 sec  
PD 5.0000 sec  
PW1 3.90 usec  
IRNUC 19F  
CTEMP 21.7 c  
SLVNT CDCL3  
EXREF -164.90 ppm  
BF 0.12 Hz  
RGAIN 44

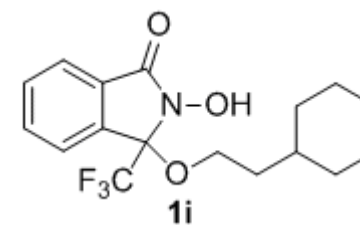

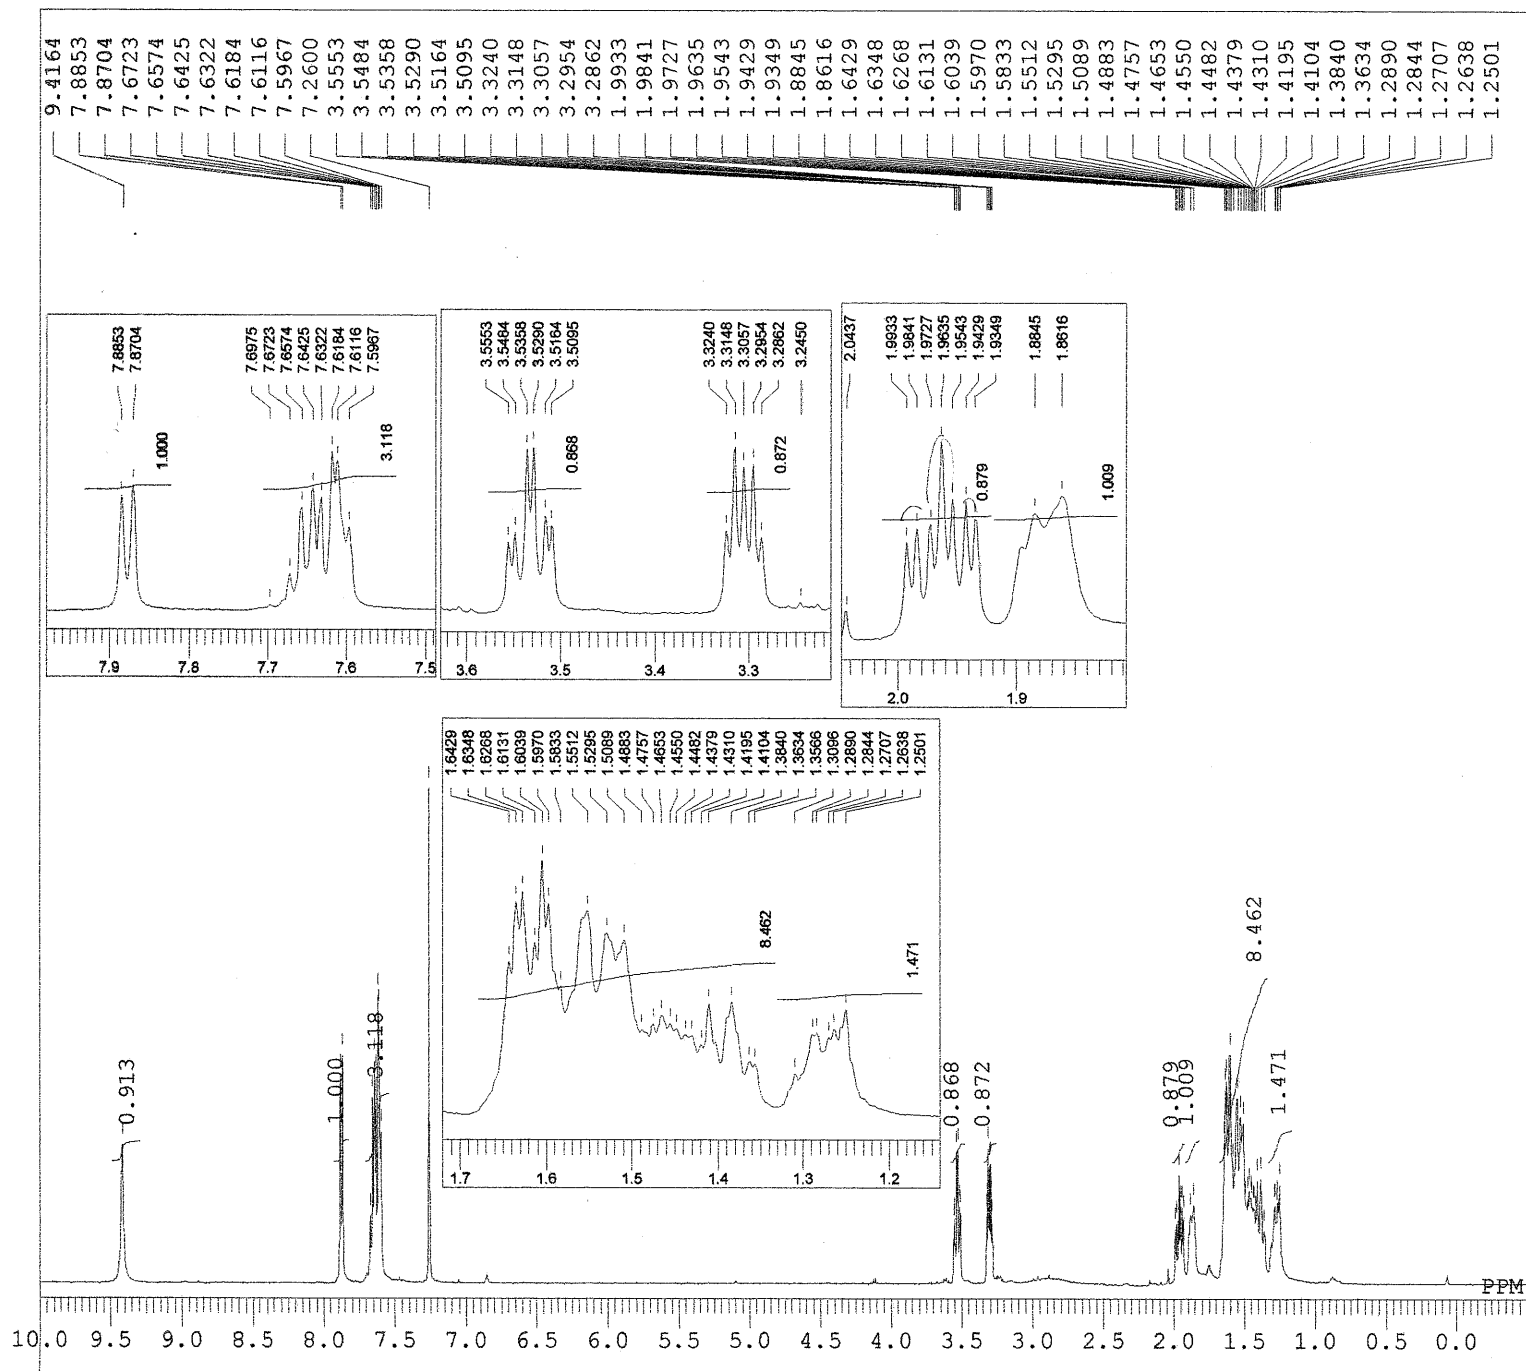

```

DFILE  ozawa04-095_3_1H.jdf
COMNT  PTLC, CyEtOH, O2
DATIM  2014-01-20 17:45:28
OBNUC  1H
EXMOD  proton.jxp
OBFREQ 500.16 MHz
OBSET  2.41 KHz
OBFIN  6.01 Hz
POINT  16384
FREQU  9384.38 Hz
SCANS  4
ACQTM  1.7459 sec
PD      5.0000 sec
FW1     5.55 usec
IRNUC  1H
CTEMP  21.2 c
SLVNT  CDCL3
EXREF  7.26 ppm
BF      1.00 Hz
RGAIN  38
    
```

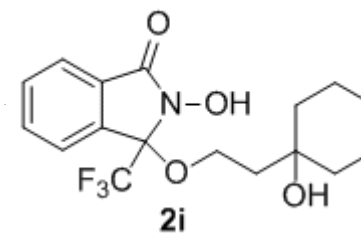



CyEtOH, [0]

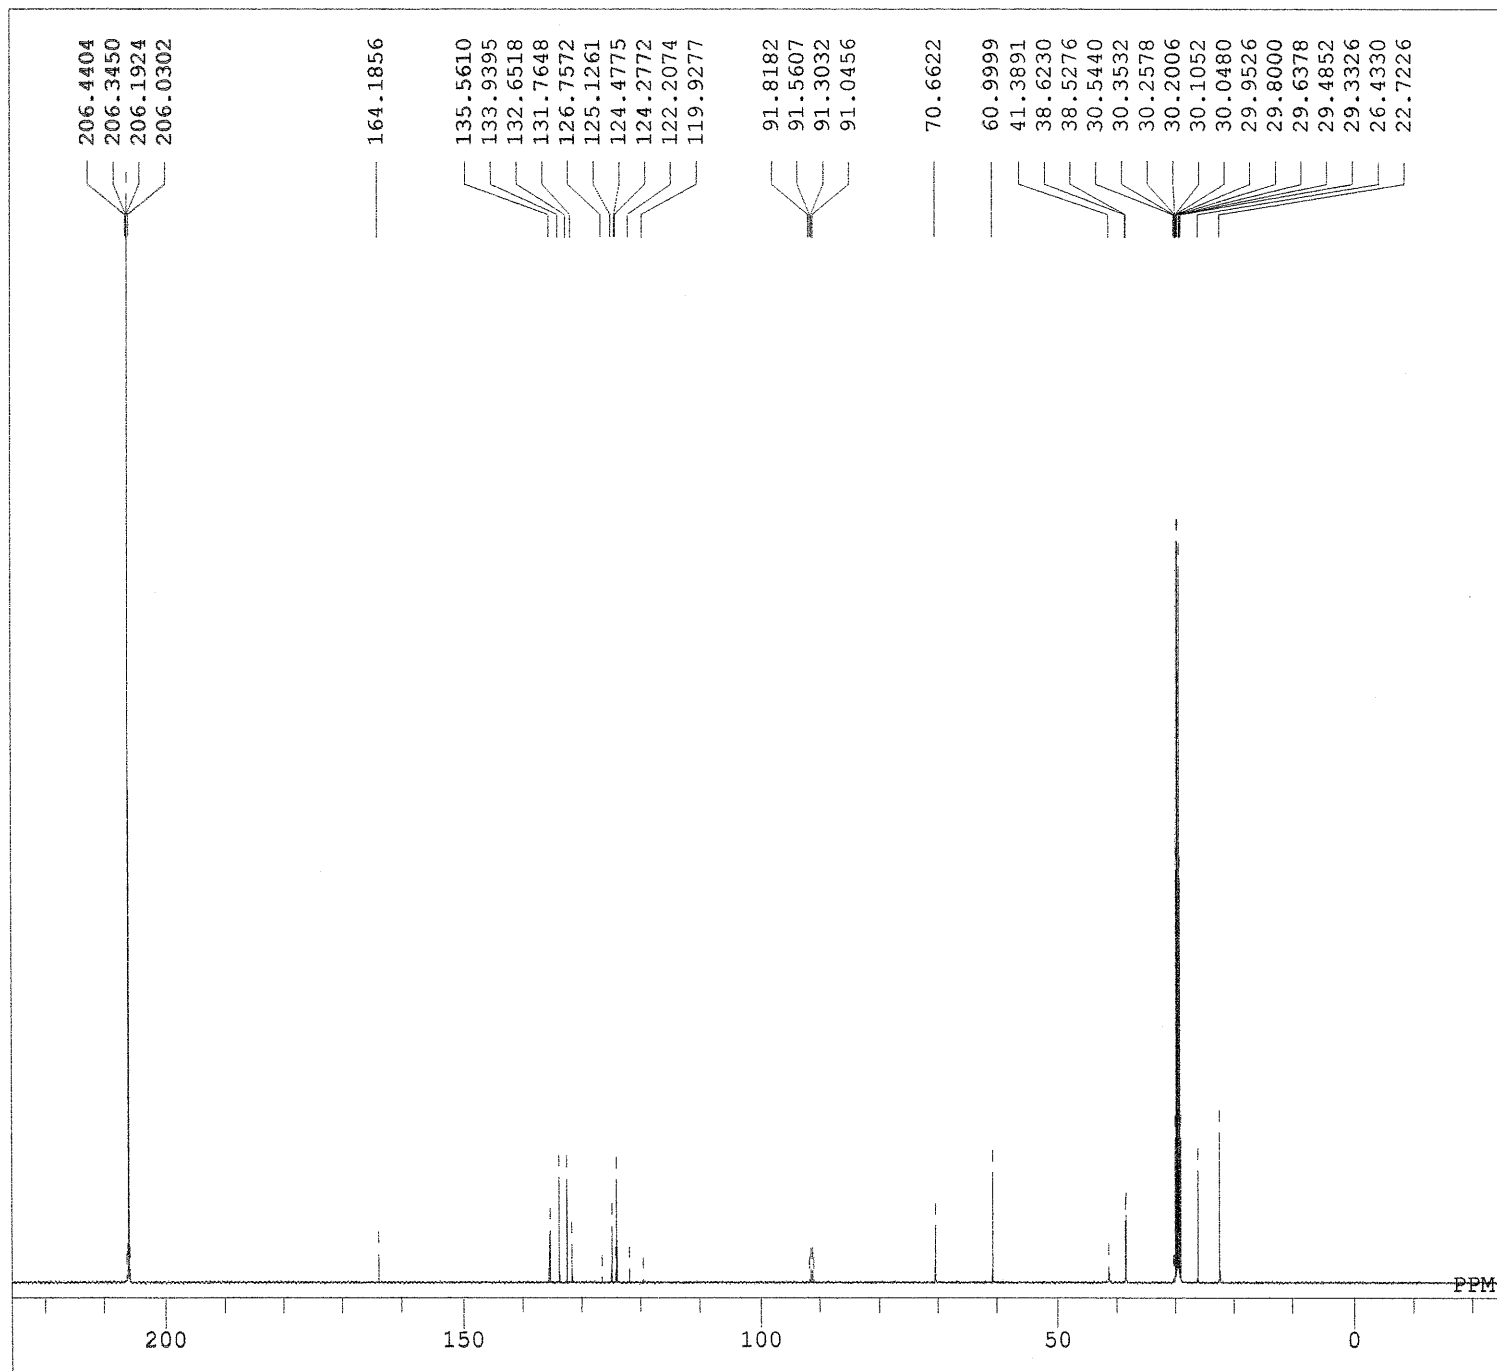

DFILE ozawa04-095\_3\_13C.jdf  
COMNT CyEtOH, [0]  
DATIM 2014-01-27 17:41:41  
OBNUC 13C  
EXMOD carbon.jxp  
OBFRQ 125.77 MHz  
OBSET 7.87 KHz  
OBFIN 4.21 Hz  
POINT 32767  
FREQU 39308.18 Hz  
SCANS 1700  
ACQTM 0.8336 sec  
PD 3.0000 sec  
PW1 3.40 usec  
IRNUC 1H  
CTEMP 22.5 c  
SLVNT ACETN  
EXREF 29.80 ppm  
BF 1.00 Hz  
RGAIN 60

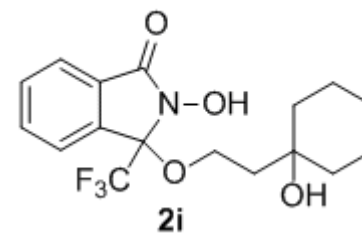

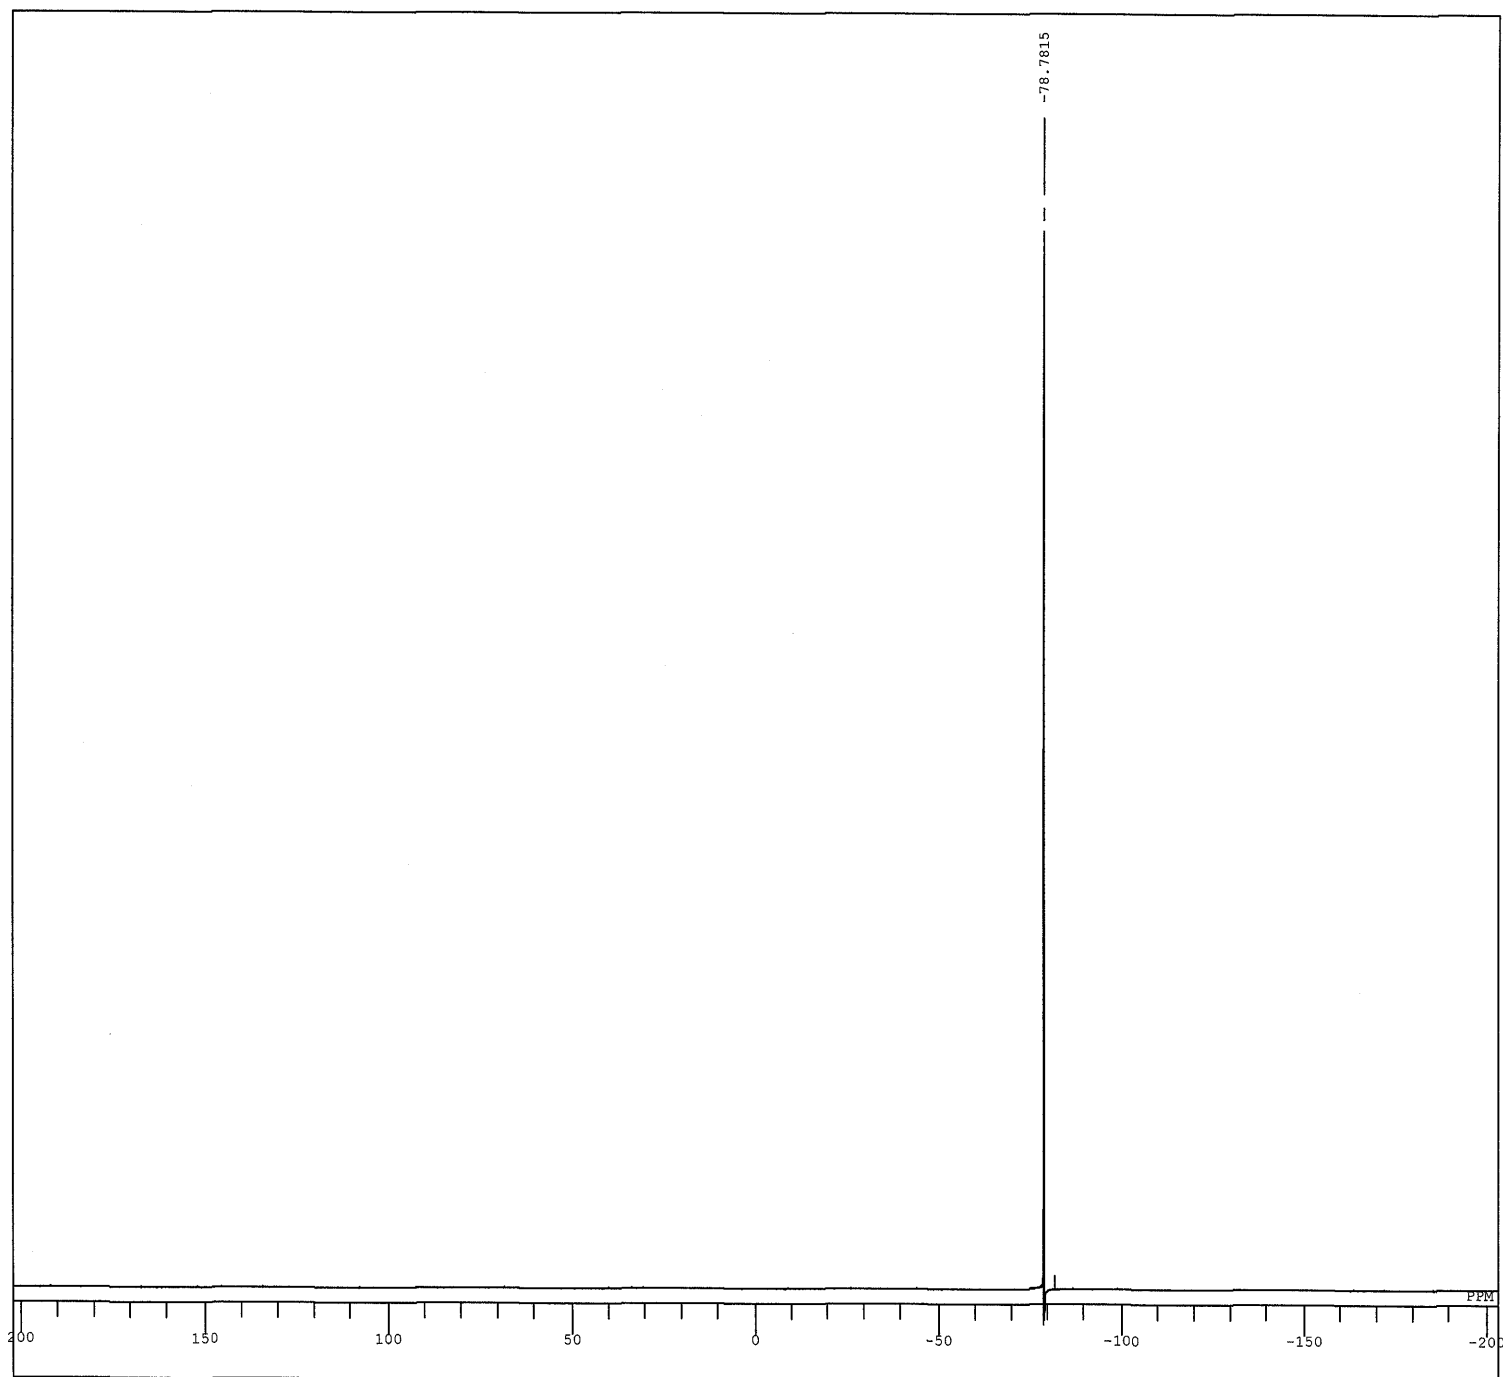

DFILE ozawa04-095\_3\_19F.jdf  
COMNT CyEtOH, [O]  
DATIM 27-01-2014 19:53:16  
OBNUC 19F  
EXMOD proton.jxp  
OBFREQ 368.64 MHz  
OBSEF 7.63 KHz  
OBFIN 2.85 Hz  
POINT 16384  
FREQU 186567.17 Hz  
SCANS 4  
ACQTM 0.0878 sec  
PD 5.0000 sec  
PW1 3.90 usec  
IRNUC 19F  
CTEMP 21.1 c  
SLVNT ACETN  
EXREF -164.90 ppm  
BF 0.10 Hz  
RGAIN 48

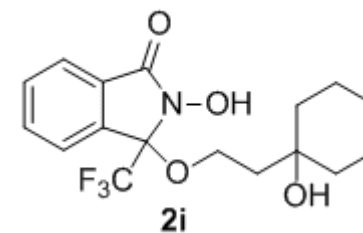

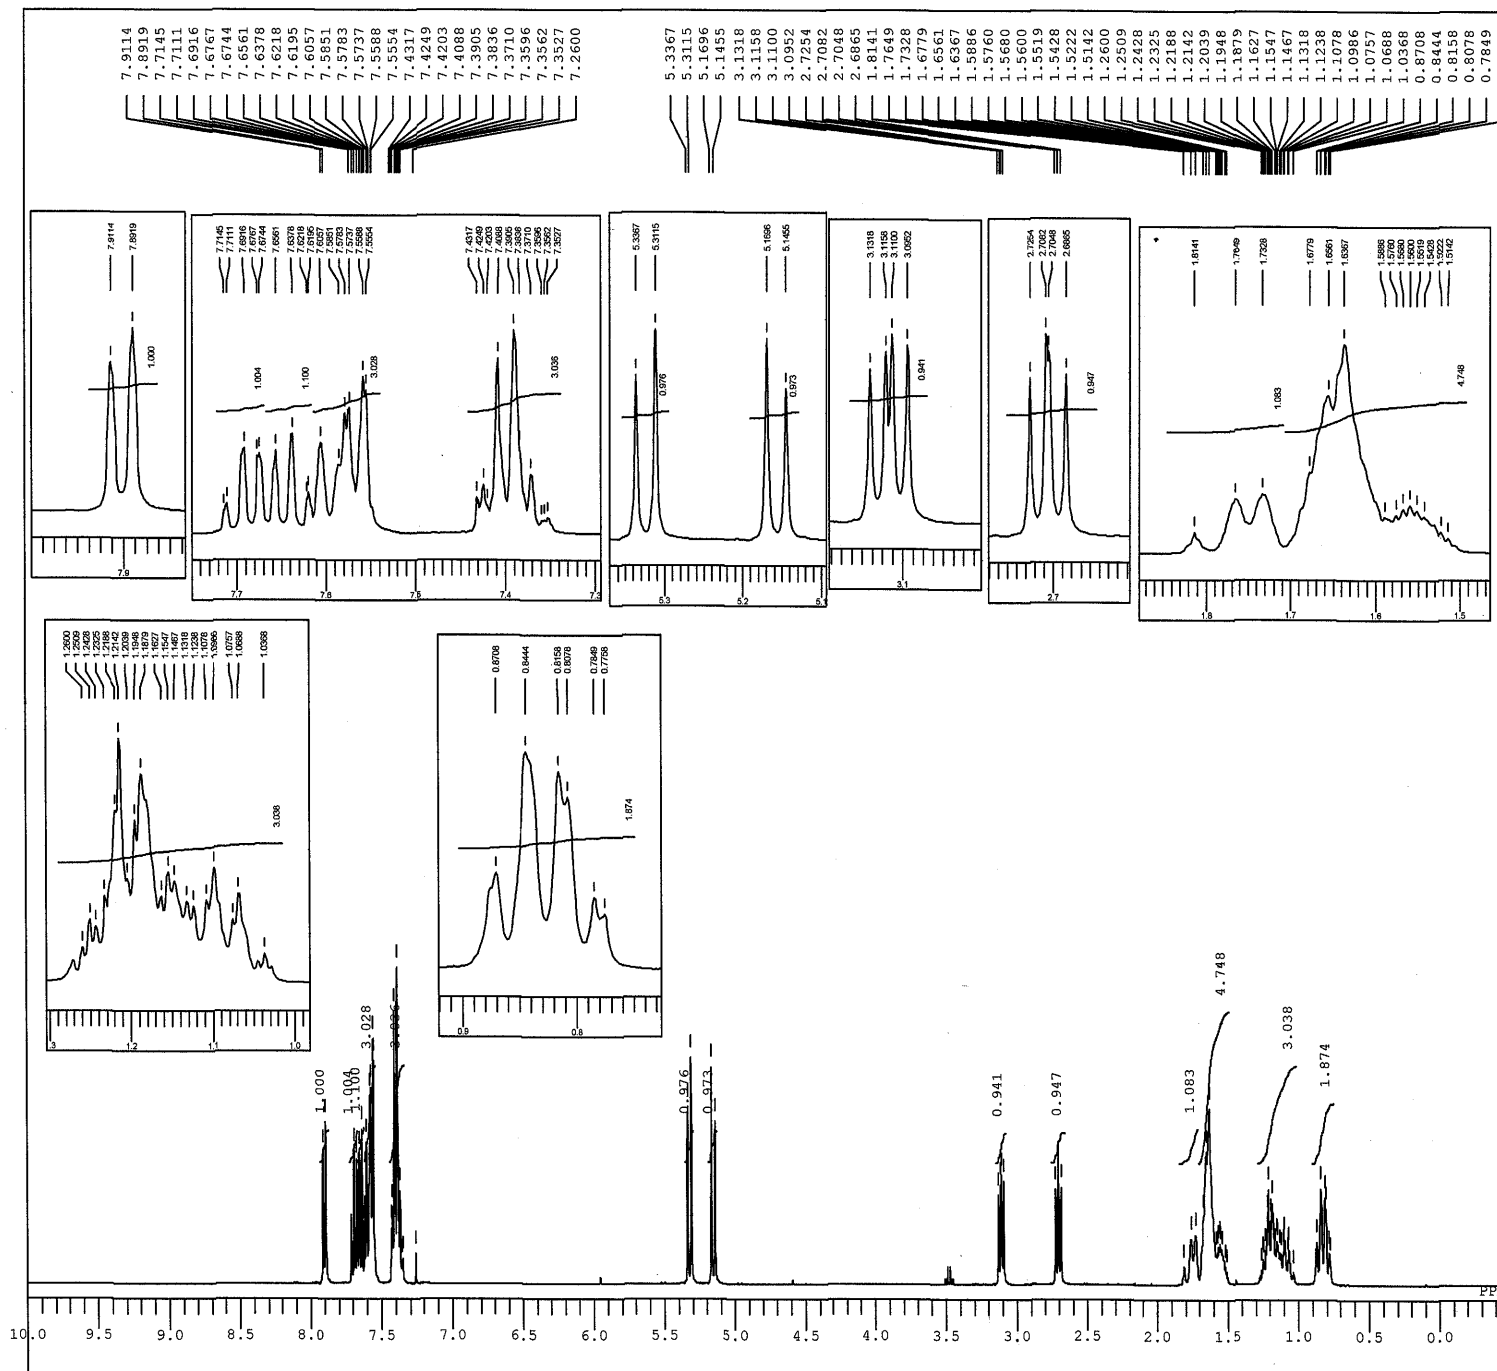

DFILE ozawa04-122\_2\_1H.jdf  
 COMNT CyMeOH, OH  
 DATIM 02-02-2014 20:32:38  
 OBNUC 1H  
 EXMOD proton.jxp  
 OBFREQ 391.78 MHz  
 OBSSET 8.51 KHz  
 OBFIN 3.34 Hz  
 POINT 16384  
 FREQU 7348.62 Hz  
 SCANS 4  
 ACQTM 2.2295 sec  
 PD 5.0000 sec  
 PW1 5.25 usec  
 IRNUC 1H  
 CTEMP 21.1 c  
 SLVNT CDCL3  
 EXREF 7.26 ppm  
 BF 0.12 Hz  
 RGAIN 22

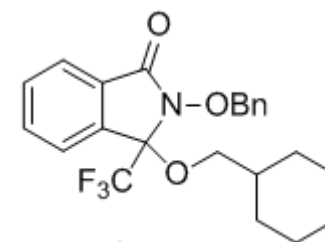

S4j

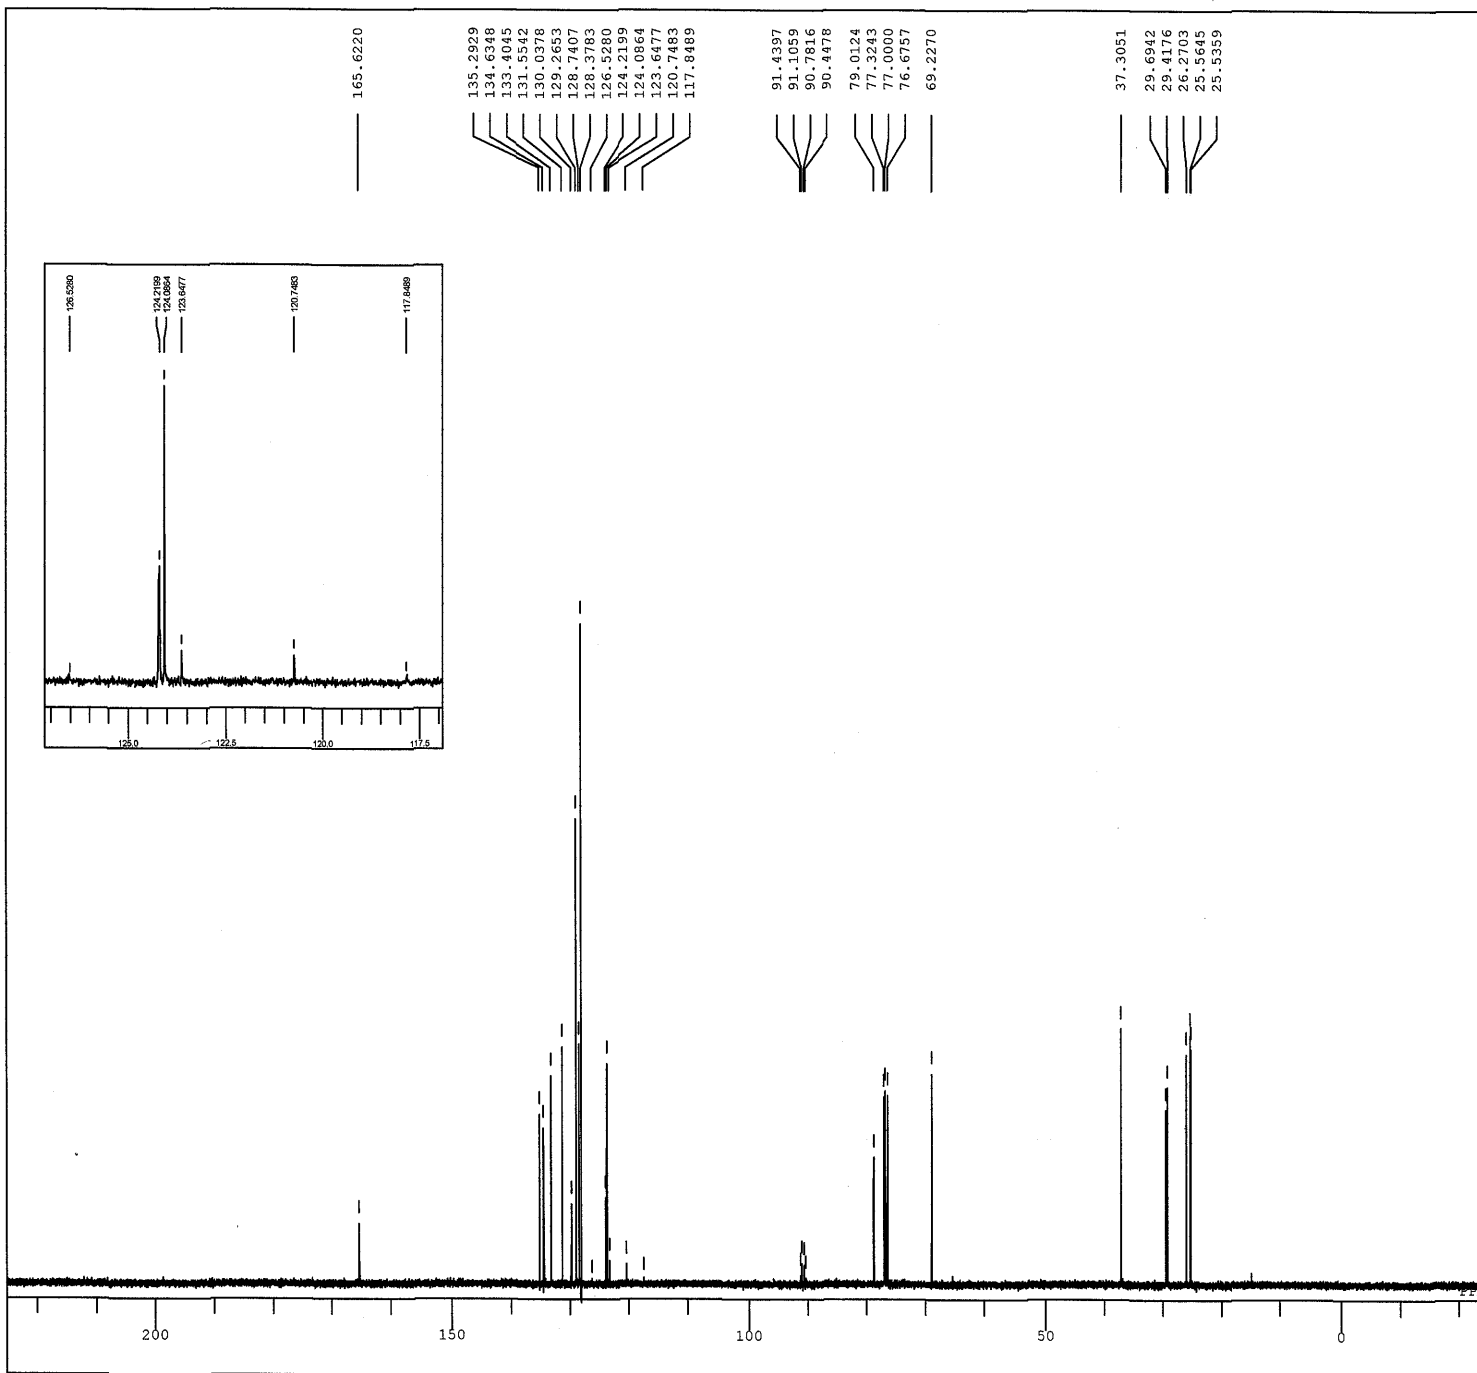

DFILE ozawa04-122\_2\_13C.jdf  
 COMNT CyMeOH, OH  
 DATIM 02-02-2014 20:34:01  
 OBNUC 13C  
 EXMOD carbon.jxp  
 OBFREQ 98.52 MHz  
 OBSET 4.64 KHz  
 OBFIN 8.74 Hz  
 POINT 32767  
 FREQU 30788.18 Hz  
 SCANS 112  
 ACQTM 1.0643 sec  
 PD 3.0000 sec  
 PW1 3.00 usec  
 IRNUC 1H  
 CTEMP 21.1 c  
 SLVNT CDCL3  
 EXREF 77.00 ppm  
 BF 0.12 Hz  
 RGAIN 60

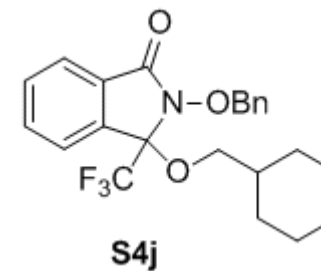

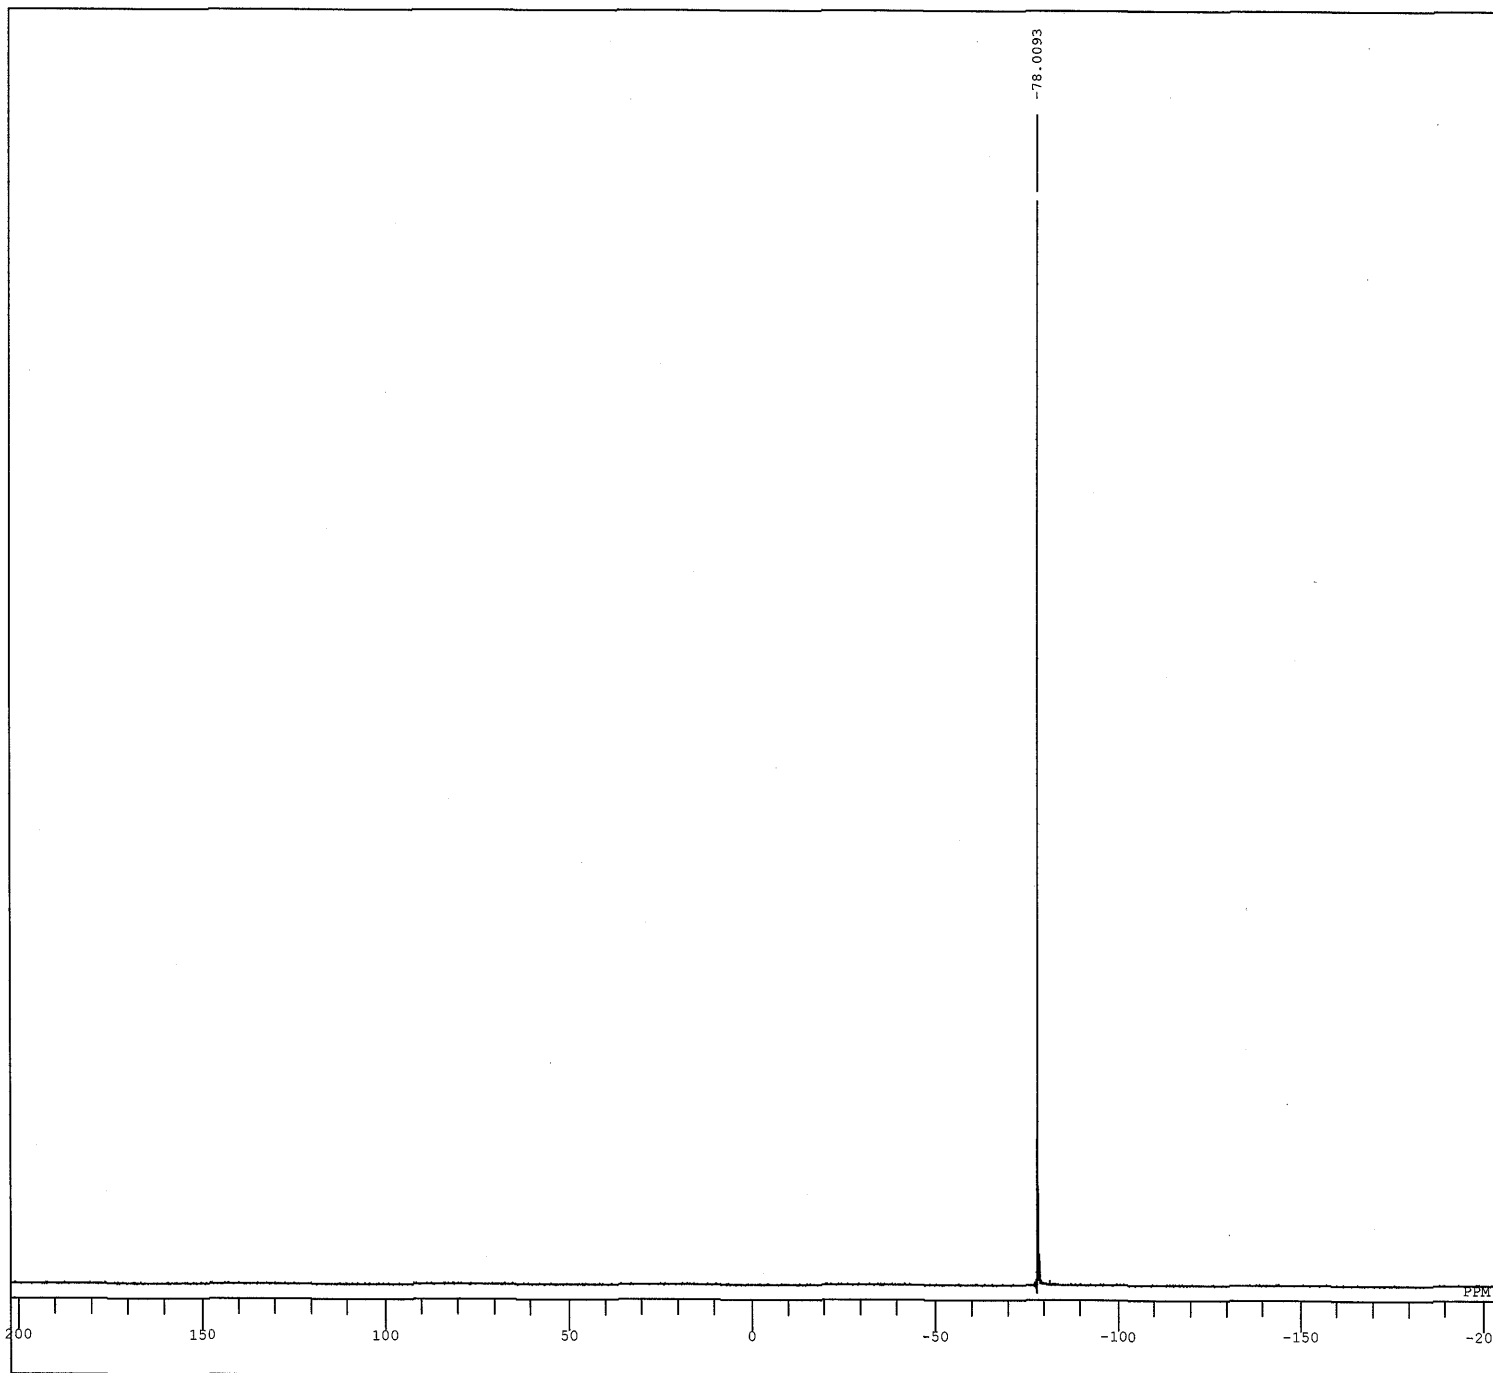

DFILE ozawa04-122\_2\_C\_19F.jdf  
COMNT CyMeOH, Bn  
DATIM 02-02-2014 14:40:20  
OBNUC 19F  
EXMOD proton.jxp  
OBFRQ 368.64 MHz  
OBSET 7.63 KHz  
OBFIN 2.85 Hz  
POINT 16384  
FREQU 186567.17 Hz  
SCANS 4  
ACQTM 0.0878 sec  
PD 5.0000 sec  
PW1 3.90 usec  
IRNUC 19F  
CTEMP 21.1 c  
SLVNT CDCL3  
EXREF -164.90 ppm  
BF 0.12 Hz  
RGAIN 46

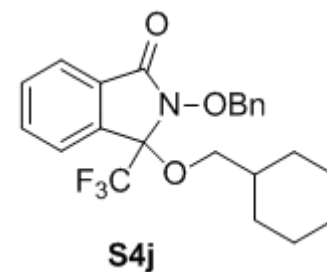

CyMeOH, OH

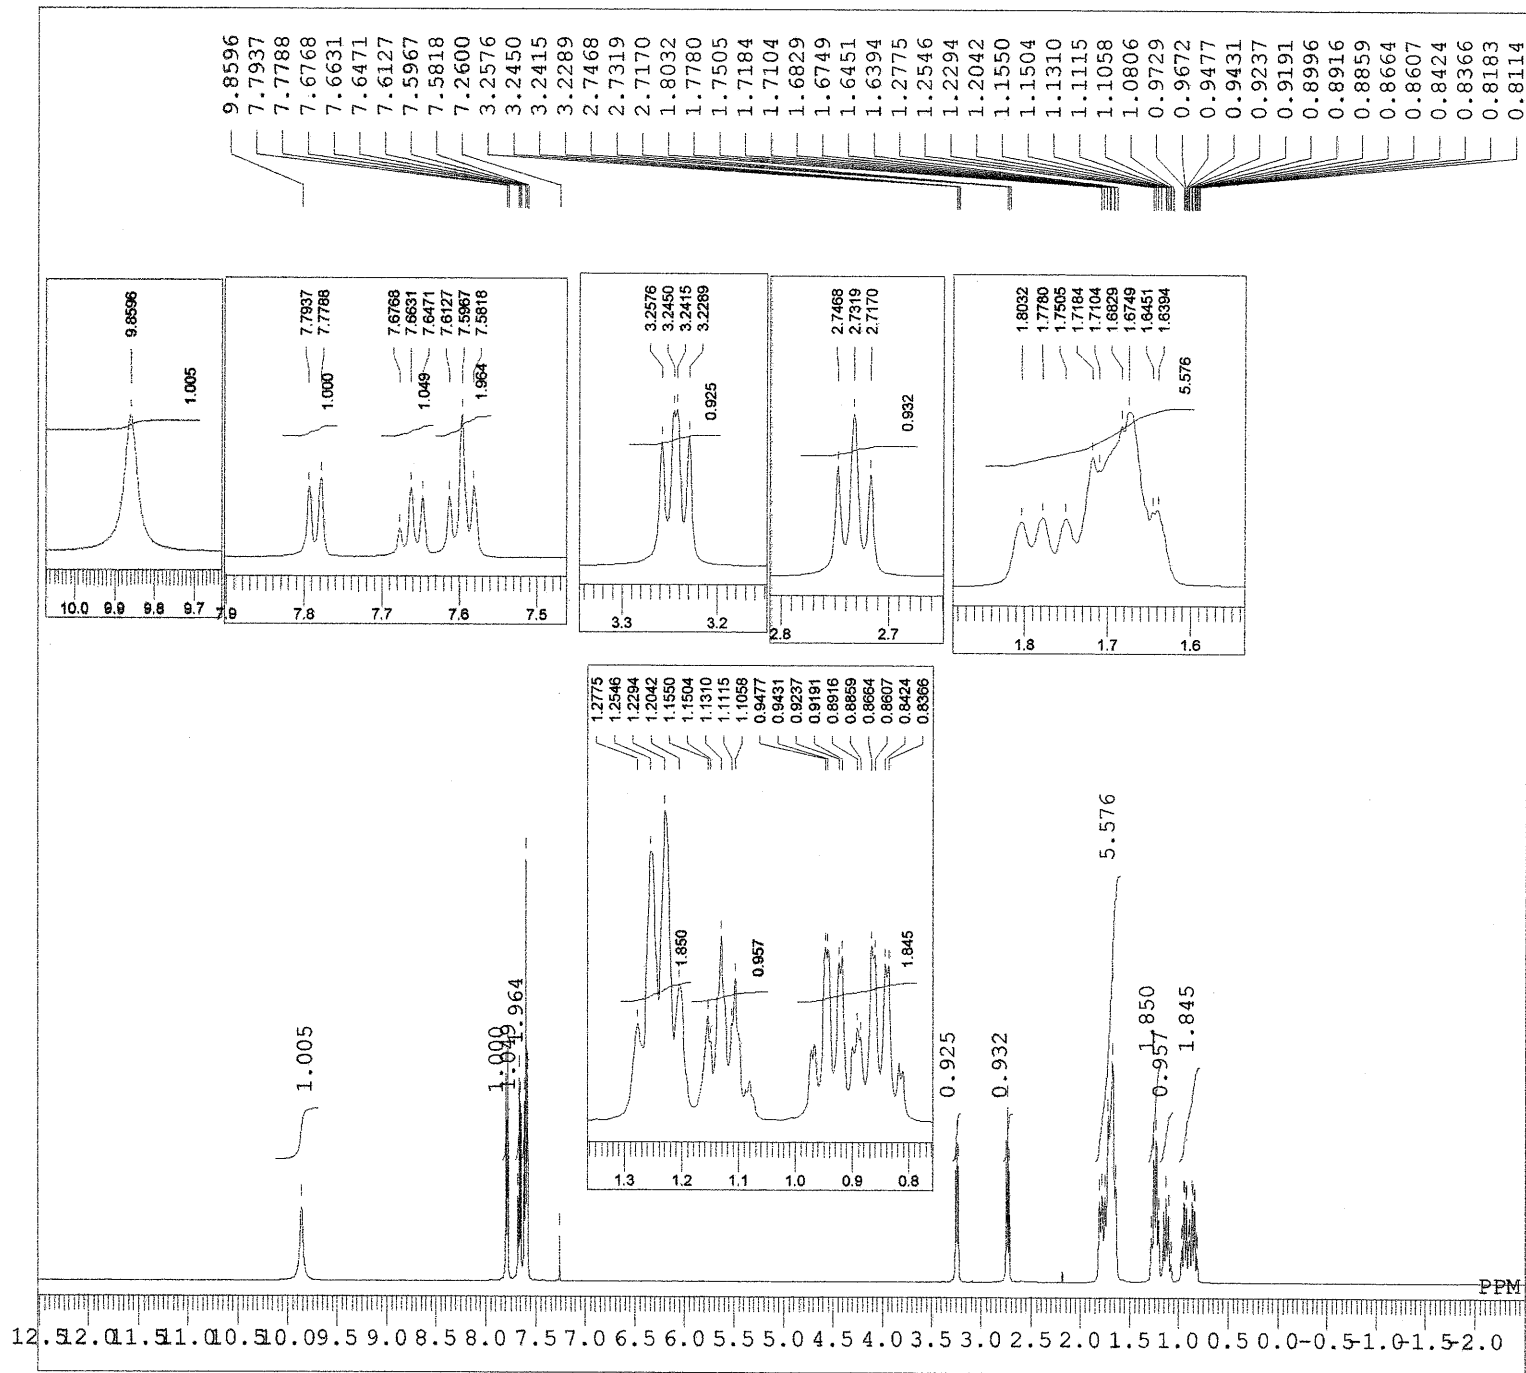

DFILE ozawa04-016\_3\_1H.jdf  
COMNT CyMeOH, OH  
DATIM 2014-02-01 19:22:50  
OBNUC 1H  
EXMOD proton.jxp  
OBFRQ 500.16 MHz  
OBSET 2.41 KHz  
OBFIN 6.01 Hz  
POINT 16384  
FREQU 9384.38 Hz  
SCANS 4  
ACQTM 1.7459 sec  
PD 5.0000 sec  
PW1 5.55 usec  
IRNUC 1H  
CTEMP 21.5 c  
SLVNT CDCL3  
EXREF 7.26 ppm  
BF 1.00 Hz  
RGAIN 30

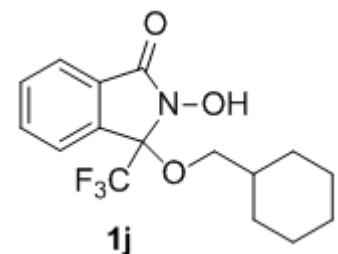

CyMeOH, OH

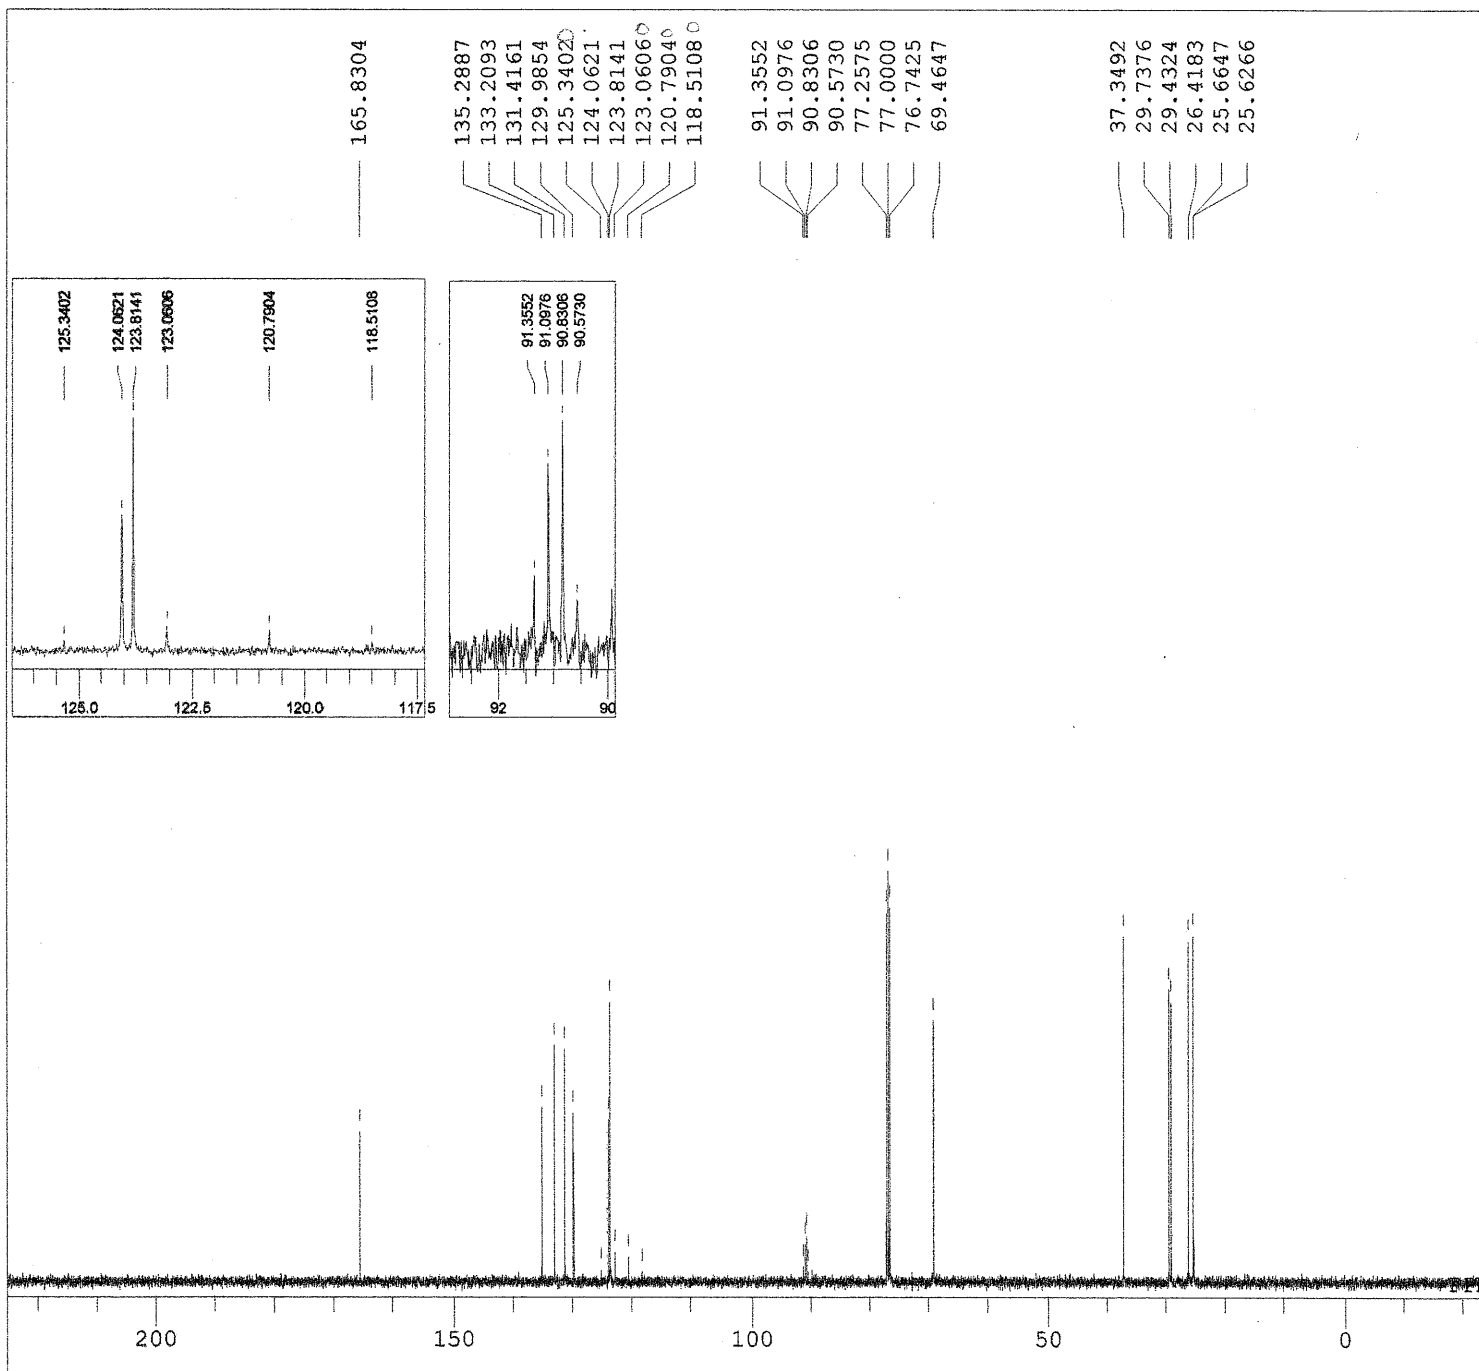

DFILE ozawa04-016\_3\_13C.jdf  
COMNT CyMeOH, OH  
DATIM 2014-02-01 19:23:53  
OBNUC 13C  
EXMOD carbon.jxp  
OBFRQ 125.77 MHz  
OBSET 7.87 KHz  
OBFIN 4.21 Hz  
POINT 32767  
FREQU 39308.18 Hz  
SCANS 60  
ACQTM 0.8336 sec  
PD 3.0000 sec  
PW1 3.40 usec  
IRNUC 1H  
CTEMP 21.5 c  
SLVNT CDCL3  
EXREF 77.00 ppm  
BF 1.00 Hz  
RGAIN 60

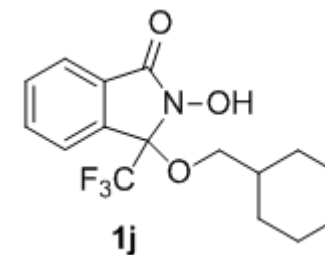

CyMeOH, OH

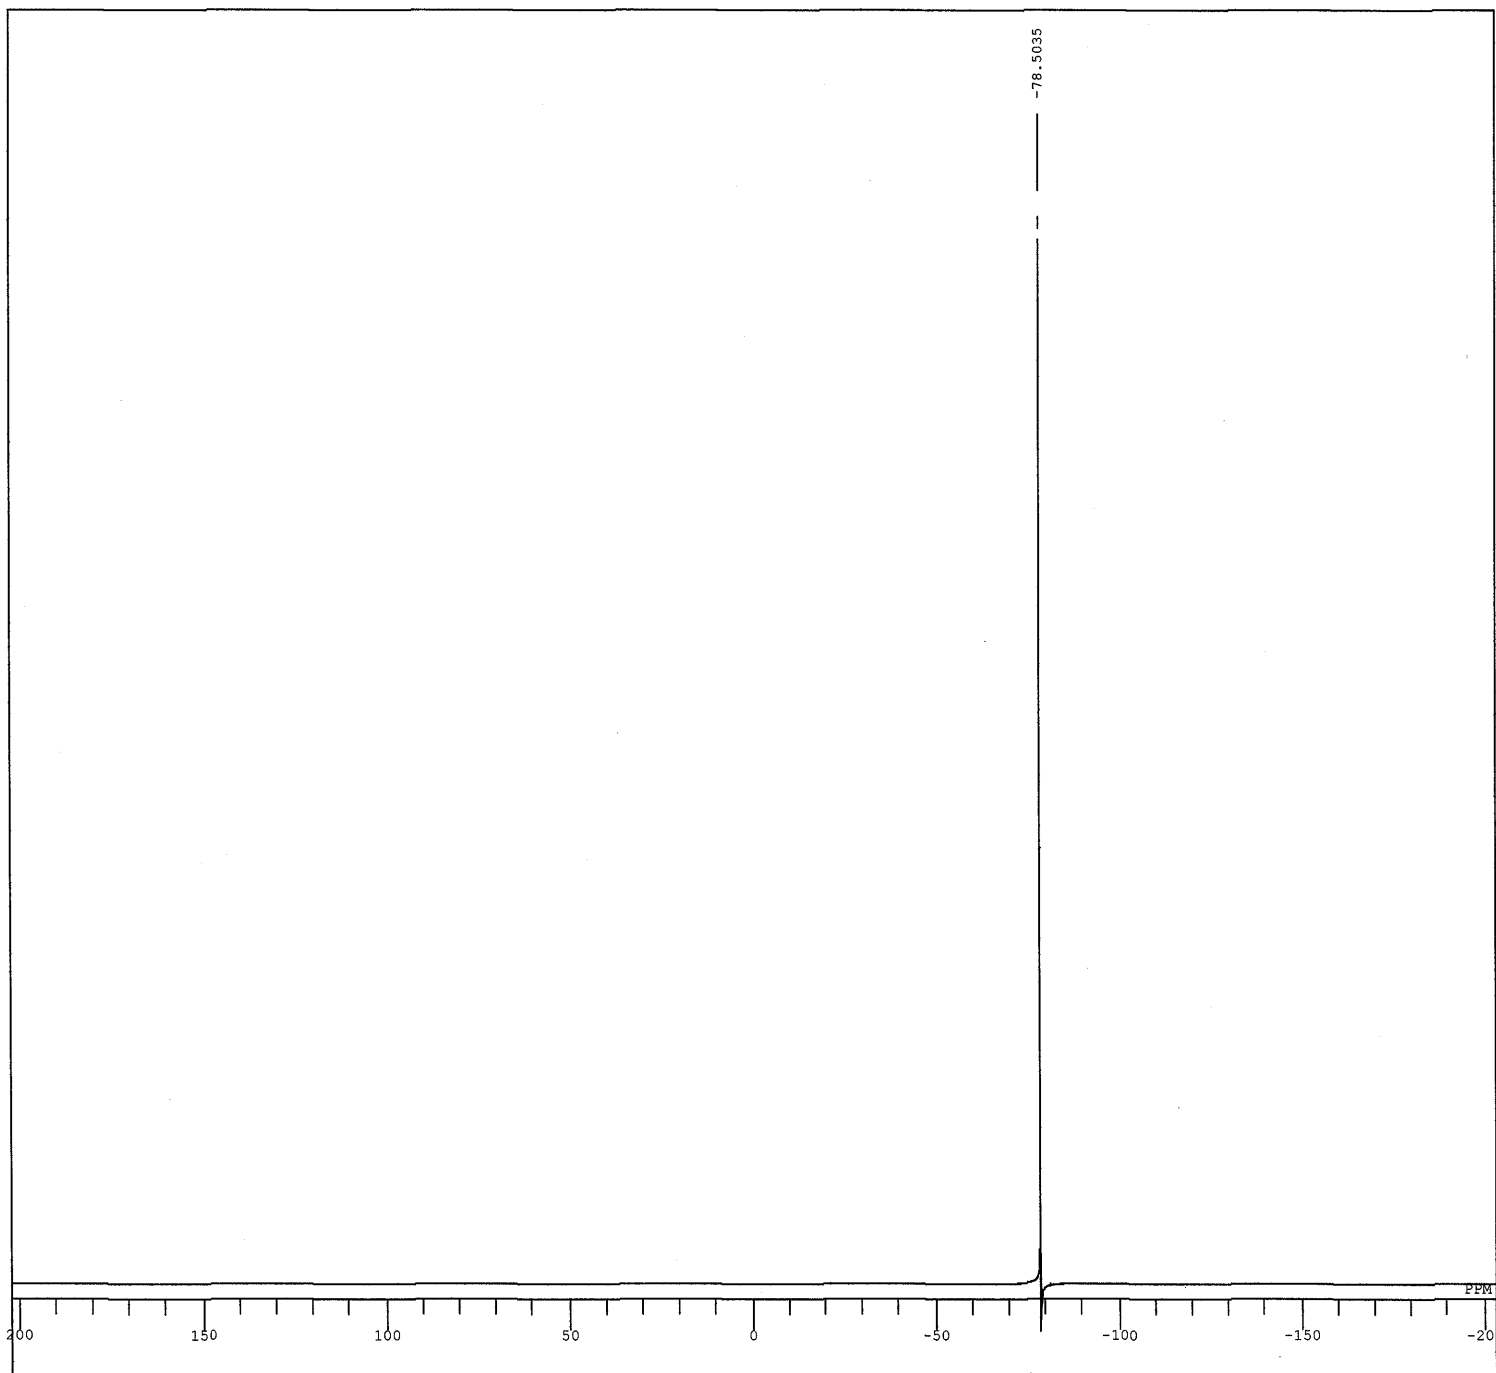

DFILE ozawa04-016\_3\_19F.jdf  
COMNT CyMeOH, OH  
DATIM 01-02-2014 19:56:07  
OBNUC 19F  
EXMOD proton.jxp  
OBFREQ 368.64 MHz  
OBSEF 7.63 KHz  
OBFIN 2.85 Hz  
POINT 16384  
FREQU 186567.17 Hz  
SCANS 4  
ACQTM 0.0878 sec  
PD 5.0000 sec  
PWL 3.90 usec  
IRNUC 19F  
CTEMP 21.1 c  
SLVNT CDCL3  
EXREF -164.90 ppm  
BF 0.12 Hz  
RGAIN 44

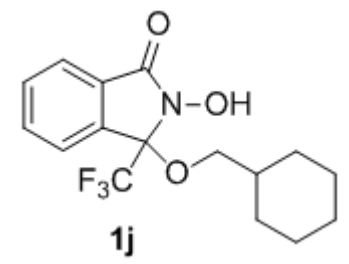



CyMeOH, [0]

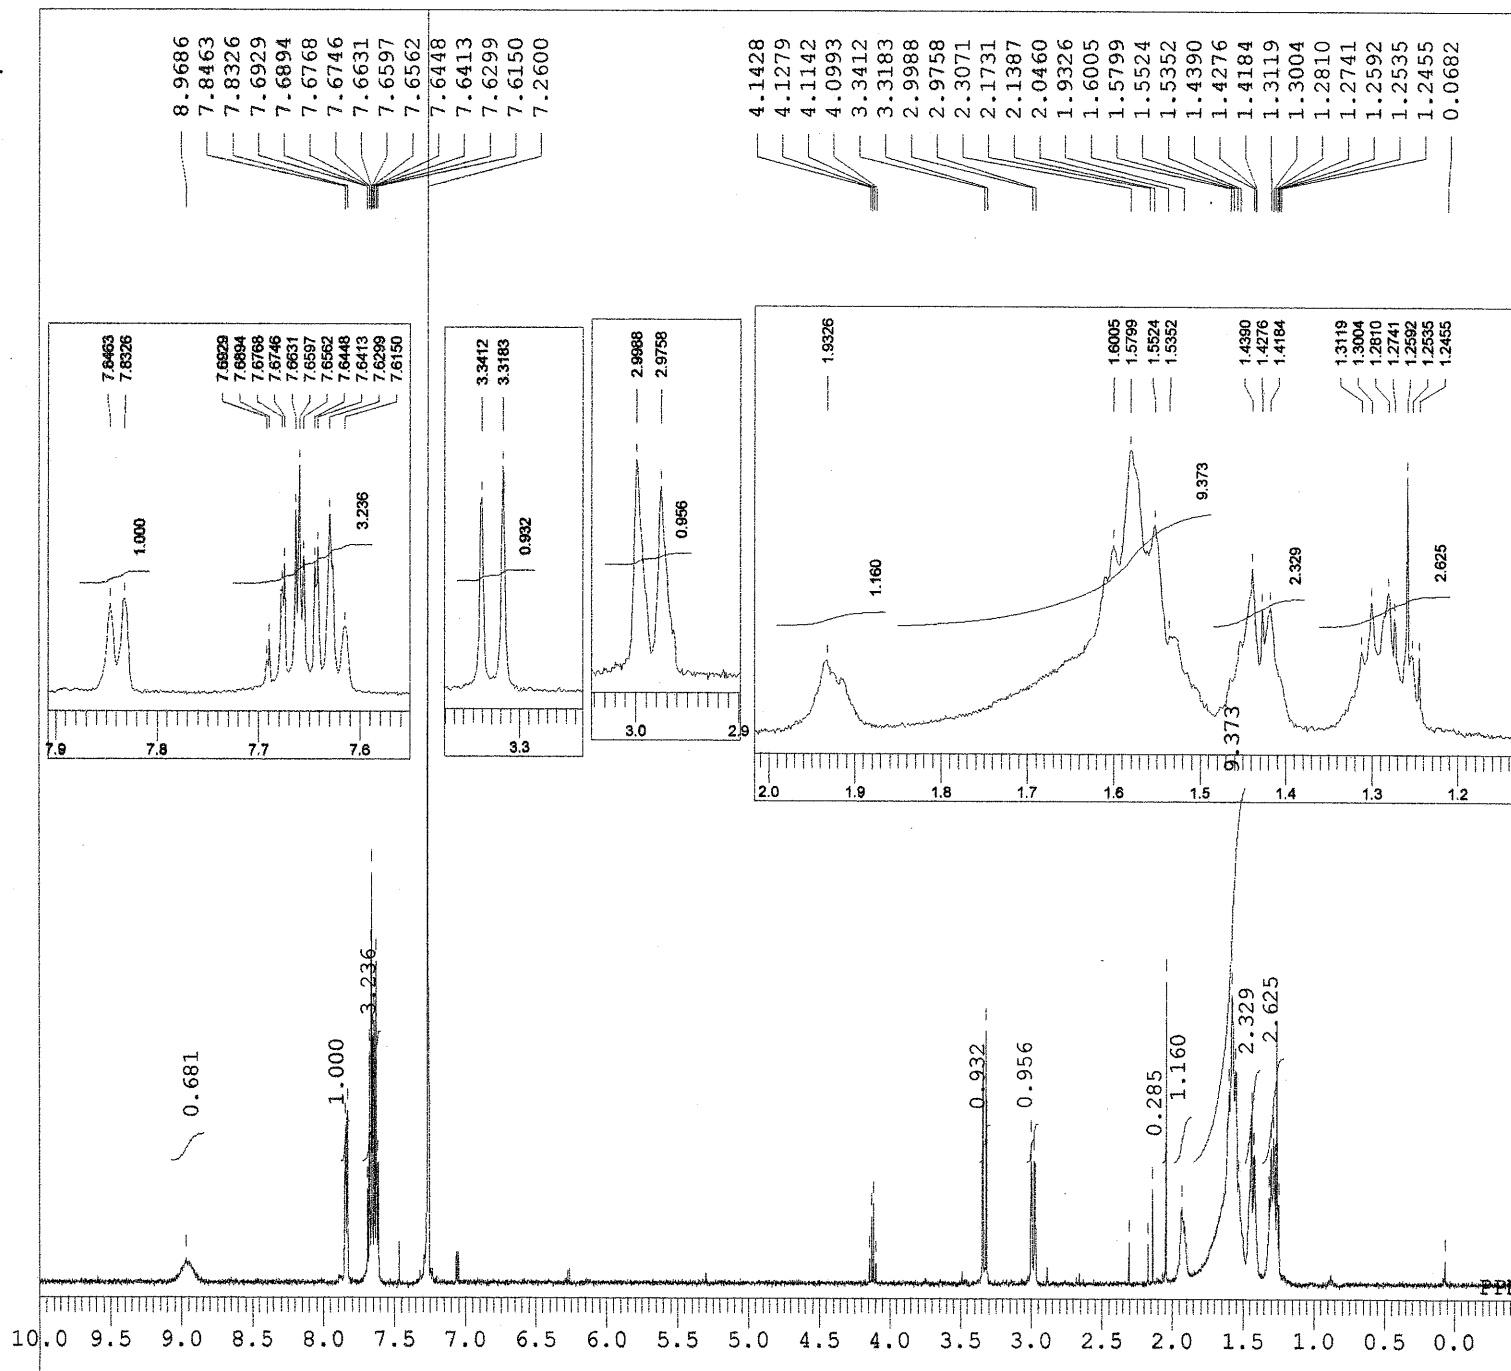

DFILE ozawa04-126\_1H.jdf  
COMNT CyMeOH, [0]  
DATIM 2014-03-11 20:54:32  
OBNUC 1H  
EXMOD proton.jxp  
OBFRQ 500.16 MHz  
OBSET 2.41 KHz  
OBFIN 6.01 Hz  
POINT 16384  
FREQU 9384.38 Hz  
SCANS 16  
ACQTM 1.7459 sec  
PD 5.0000 sec  
PW1 5.55 usec  
IRNUC 1H  
CTEMP 20.8 c  
SLVNT CDCL3  
EXREF 7.26 ppm  
BF 0.12 Hz  
RGAIN 40

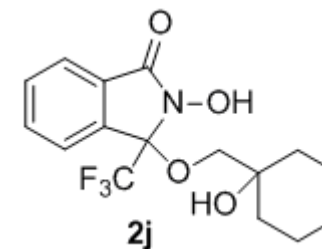

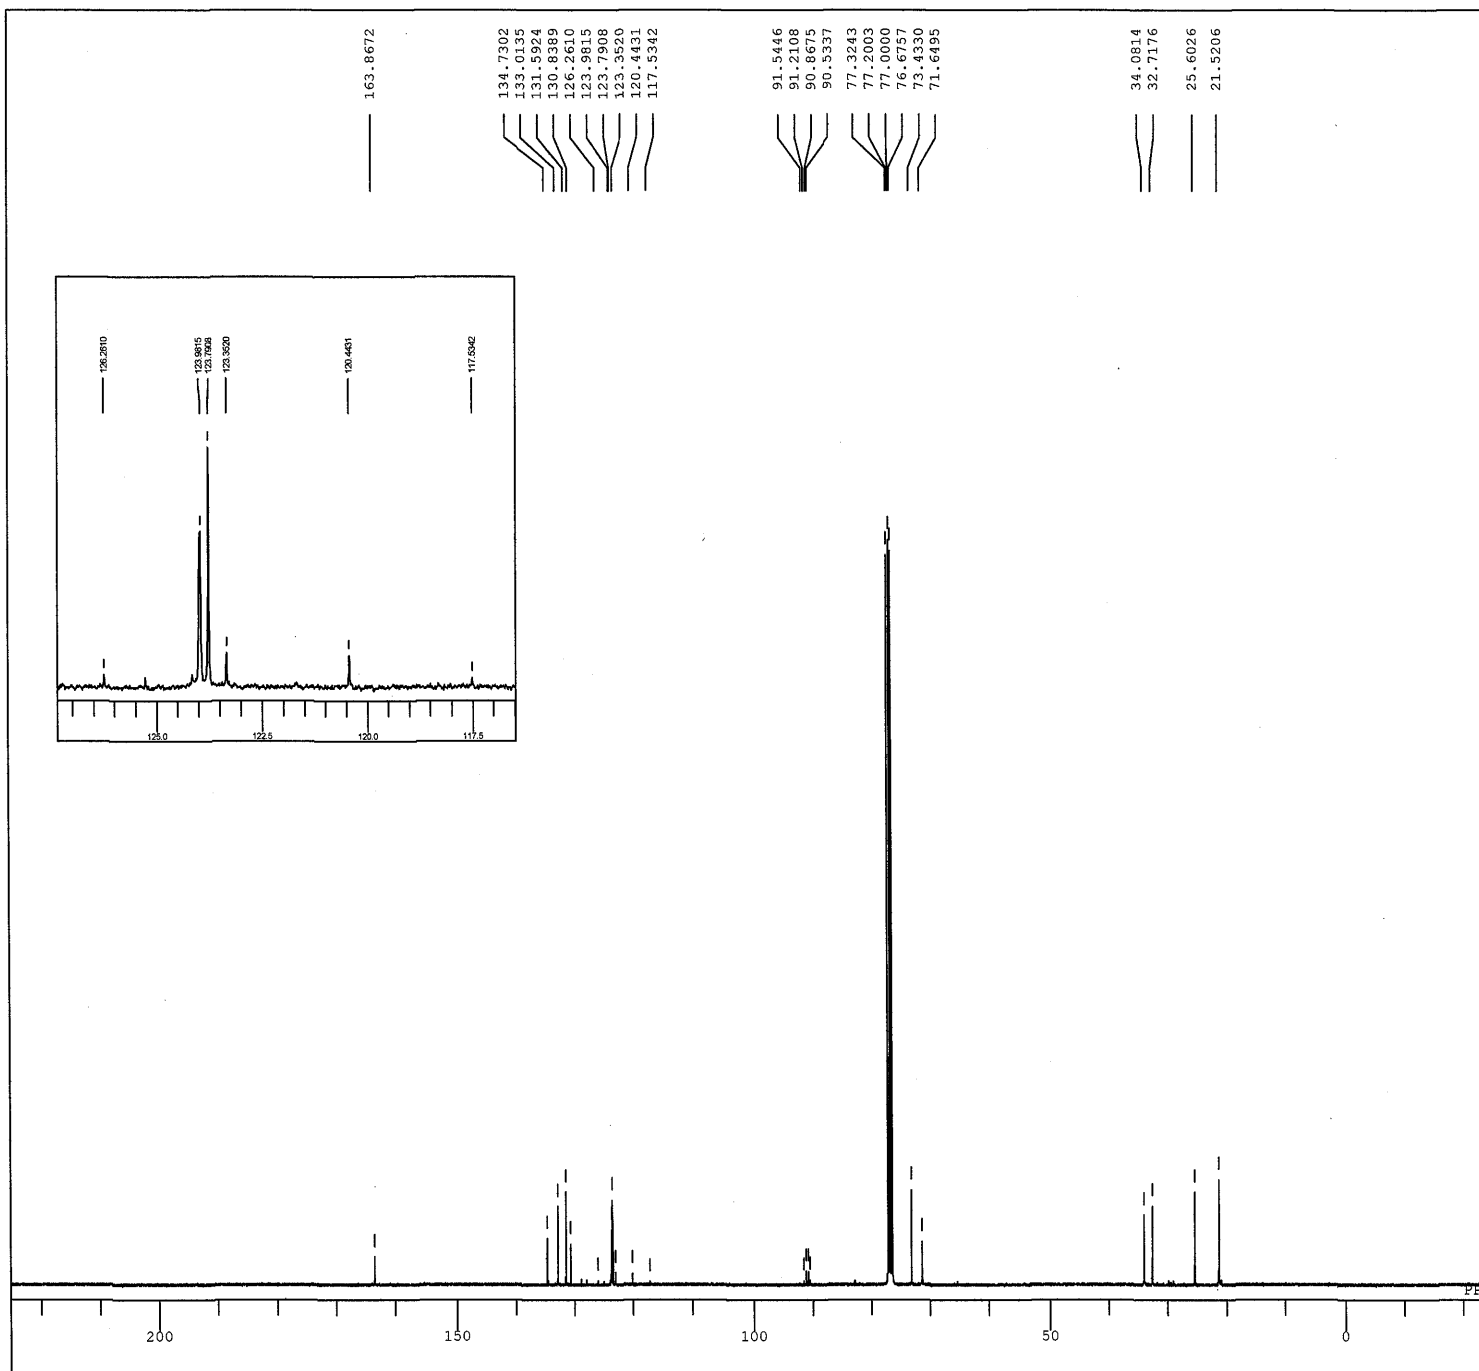

DFILE ozawa04-126\_13C.jdf  
 CMNT CyMeOH, [0]  
 DATIM 07-03-2014 23:10:53  
 OBNUC 13C  
 EXMDO carbon.jxp  
 OBFRO 98.52 MHz  
 OBSEF 4.64 KHz  
 OBFIN 8.74 Hz  
 POINT 32767  
 FREQU 30788.18 Hz  
 SCANS 10334  
 ACQTM 1.0643 sec  
 PD 3.0000 sec  
 PW1 3.00 usec  
 IRNUC 1H  
 CTEMP 21.2 c  
 SLVNT CDCL3  
 EXREF 77.00 ppm  
 BF 1.20 Hz  
 RGAIN 60

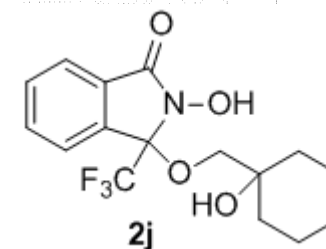

CyMeOH, [0]

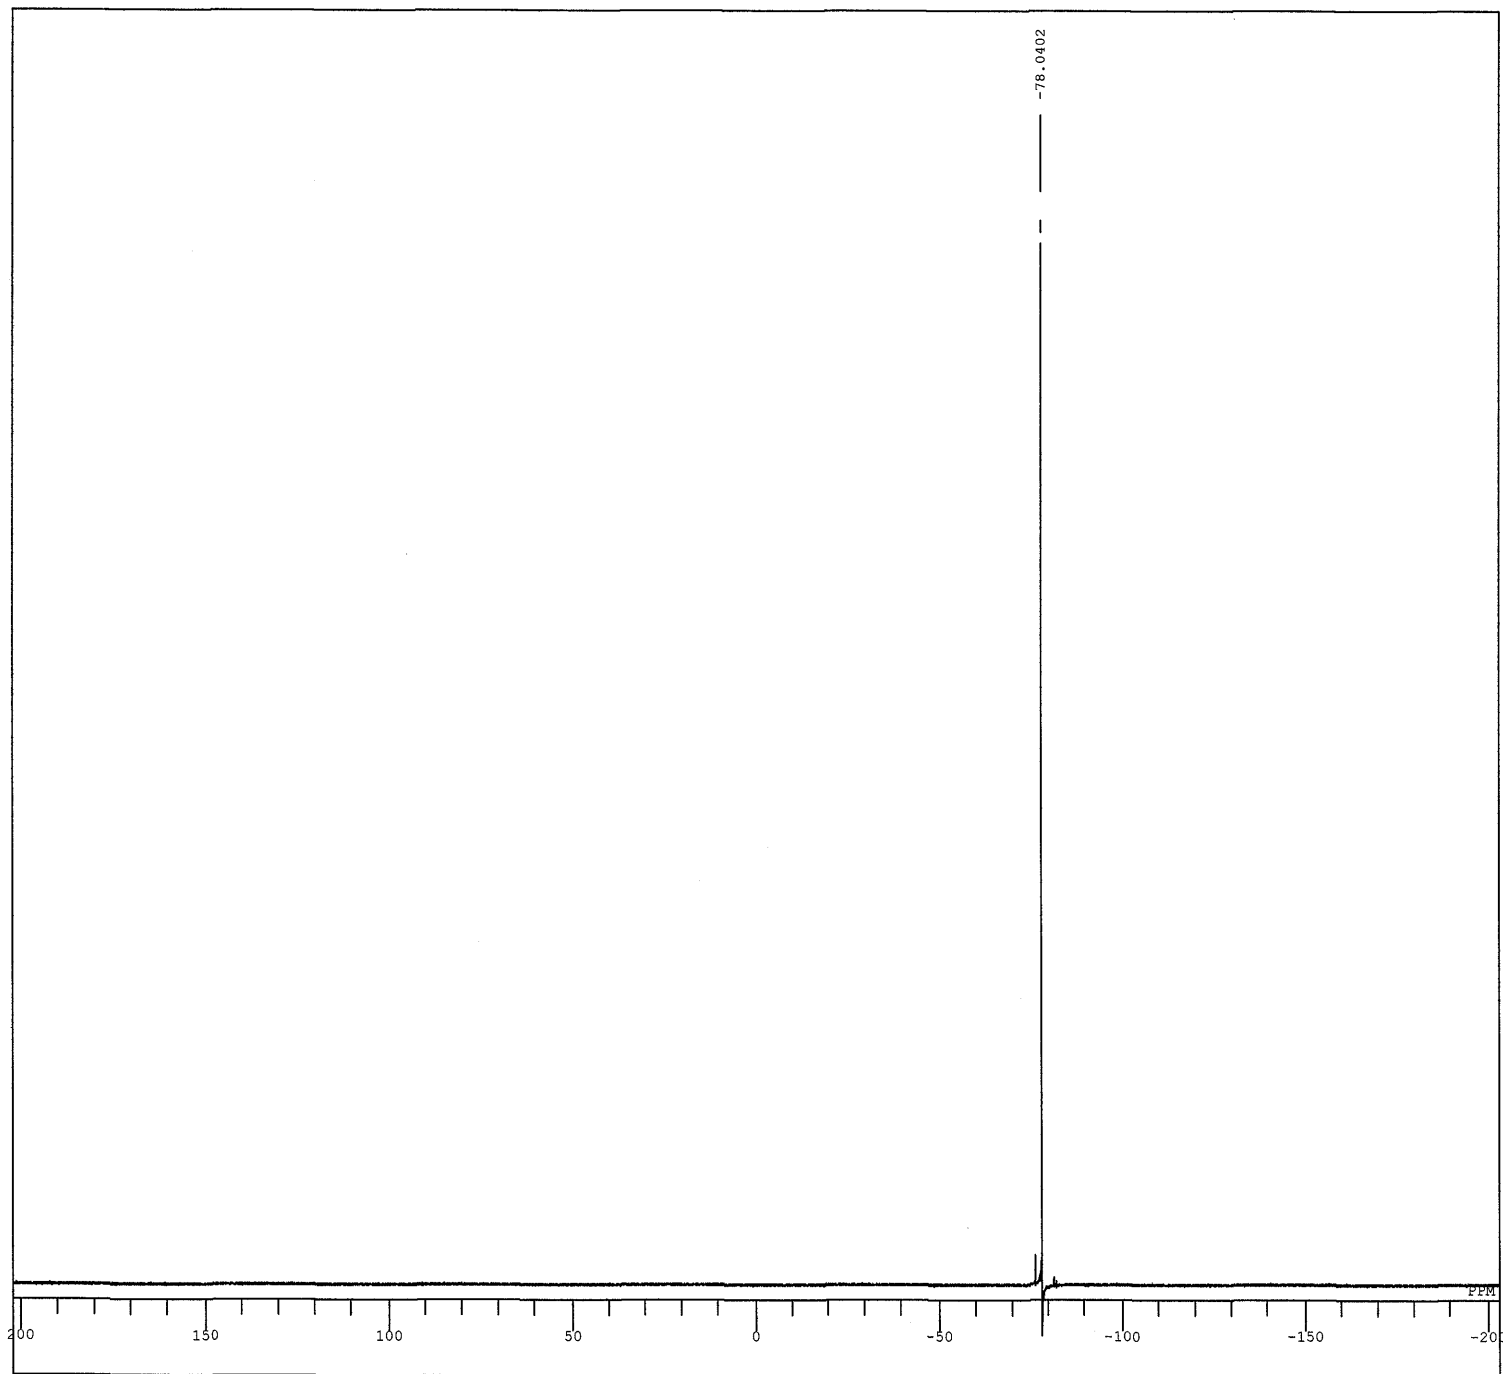

DFILE ozawa04-126\_19F.jdf  
COMNT CyMeOH, [0]  
DATIM 07-03-2014 17:36:34  
OBNUC 19F  
EXMOD proton.jxp  
OBFRQ 368.64 MHz  
OBSET 7.63 KHz  
OBFIN 2.85 Hz  
POINT 16384  
FREQU 186567.17 Hz  
SCANS 4  
ACQTM 0.0878 sec  
PD 5.0000 sec  
PW1 3.90 usec  
IRNUC 19F  
CTEMP 21.3 c  
SLVNT CDCL3  
EXREF -164.90 ppm  
BF 0.12 Hz  
RGAIN 46

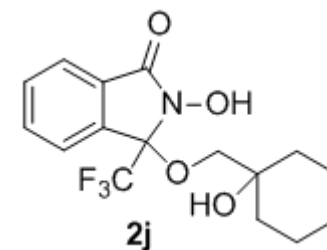

menthol, LP, Bn

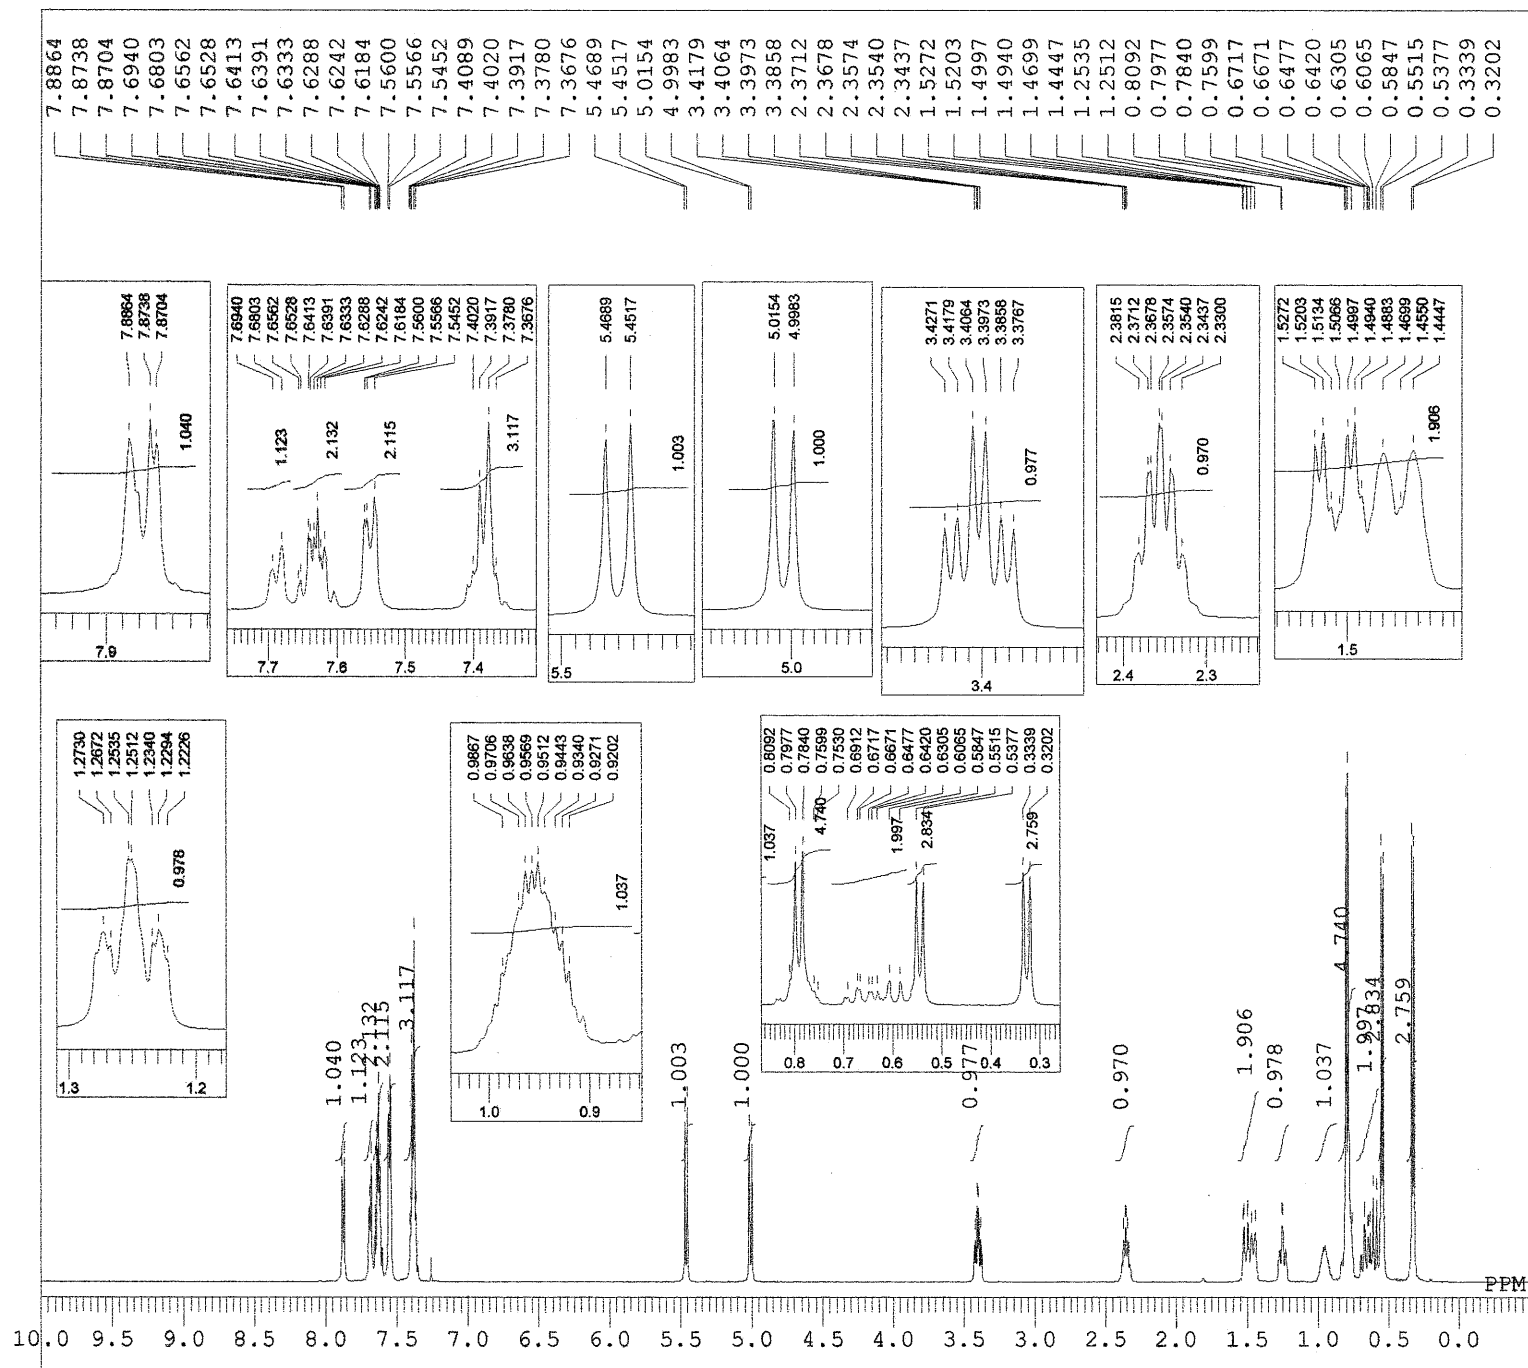

DFILE ozawa04-036\_LP\_1H.jdf  
COMNT menthol, LP, Bn  
DATIM 2014-01-30 22:31:28  
OBNUC 1H  
EXMOD proton.jxp  
OBFRQ 500.16 MHz  
OBSET 2.41 KHz  
OBFIN 6.01 Hz  
POINT 16384  
FREQU 9384.38 Hz  
SCANS 4  
ACQTM 1.7459 sec  
PD 5.0000 sec  
PW1 5.55 usec  
IRNUC 1H  
CTEMP 21.4 c  
SLVNT CDCL3  
EXREF 7.26 ppm  
BF 1.00 Hz  
RGAIN 24

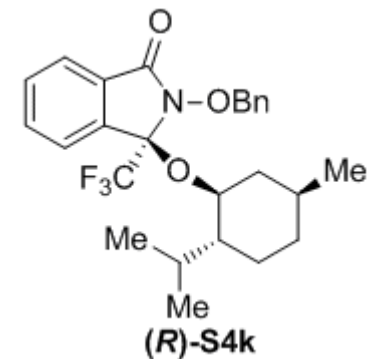

menthol, LP, Bn

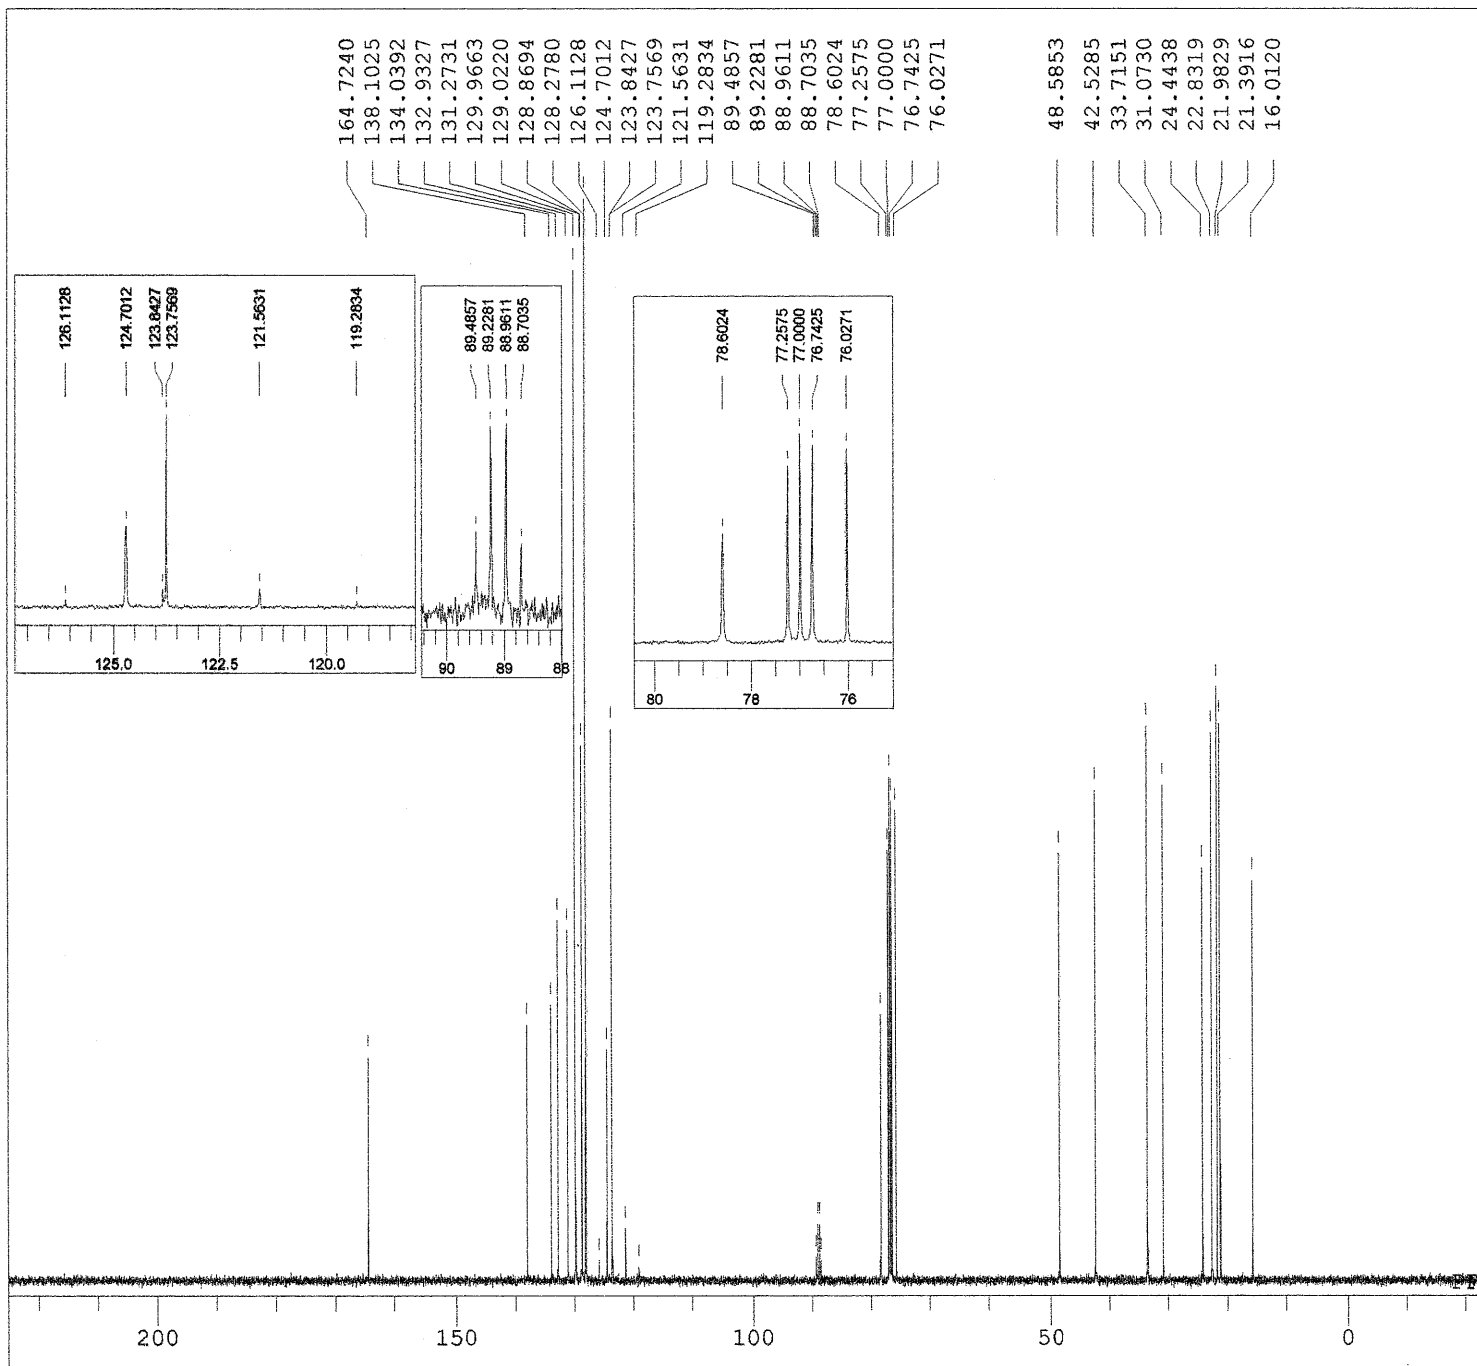

DFILE ozawa04-036\_LP\_13C.jdf  
COMNT menthol, LP, Bn  
DATIM 2014-01-30 22:32:32  
OBNUC 13C  
EXMOD carbon.jxp  
OBFRQ 125.77 MHz  
OBSET 7.87 KHz  
OBFIN 4.21 Hz  
POINT 32767  
FREQU 39308.18 Hz  
SCANS 153  
ACQTM 0.8336 sec  
PD 3.0000 sec  
PW1 3.40 usec  
IRNUC 1H  
CTEMP 21.7 c  
SLVNT CDCL3  
EXREF 77.00 ppm  
BF 1.00 Hz  
RGAIN 60

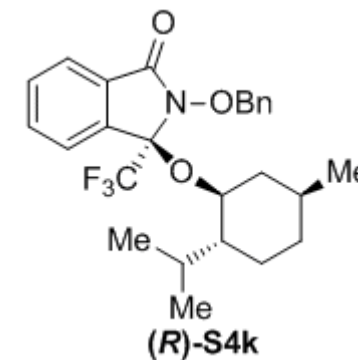

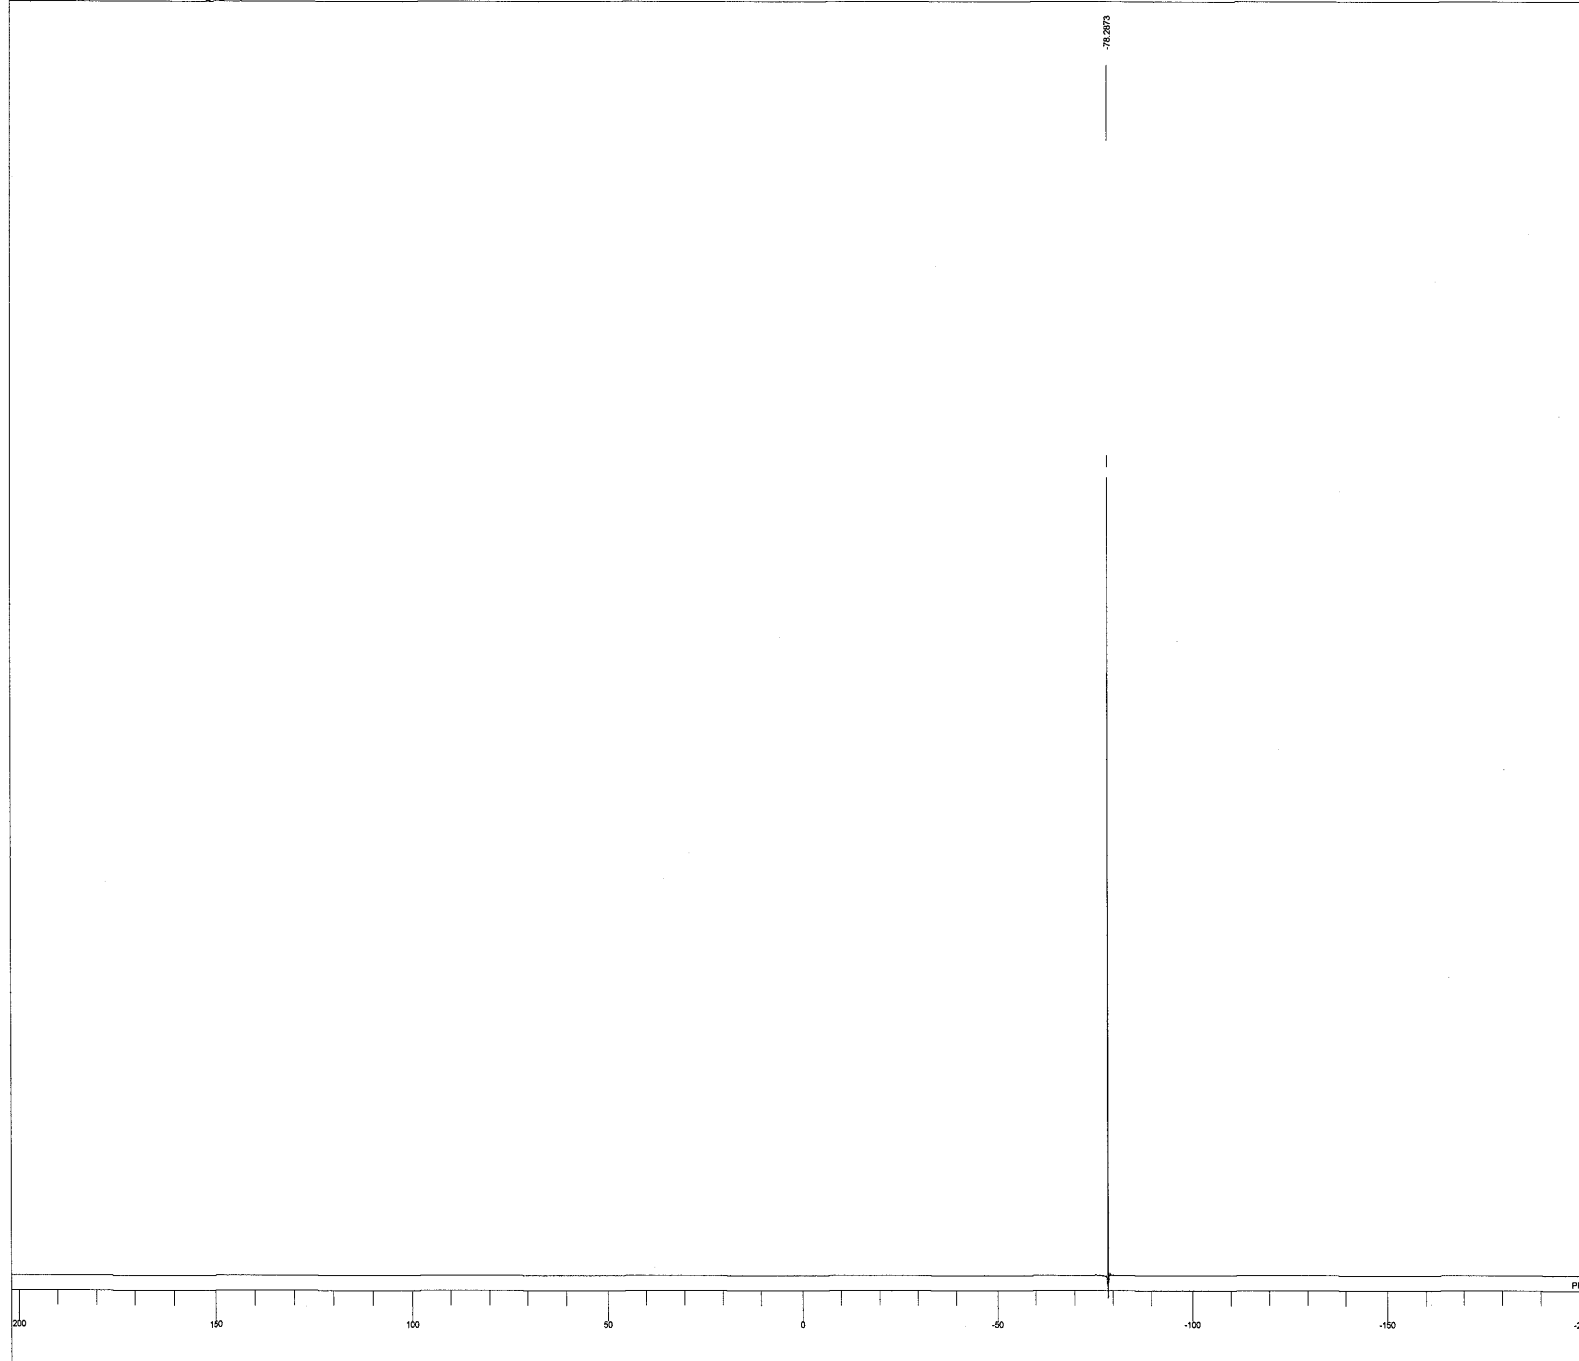

OFIIE o2aw04-038\_LP\_19F.tif  
COMINT menthol, LP, Bn  
DATIM 20-01-2014 23:00:05  
OBNUC 19F  
EXMOD proton 9p  
CIBFIC 303.64 MHz  
OBSET 7.63 KHz  
OIBIN 2.55 Hz  
POINT 16384  
FREQU 186567.17 Hz  
SCANS 4  
ACQTM 0.0878 sec  
PD 5.0000 sec  
PWI 3.50 sec  
IRNUC 19F  
CTEMP 21.1 c  
SLVNT CDCL3  
EXREF -164.90 ppm  
RF 0.12 Hz  
RGAIN 44

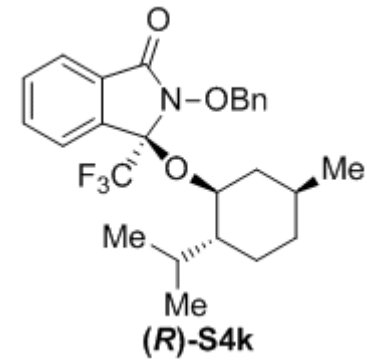

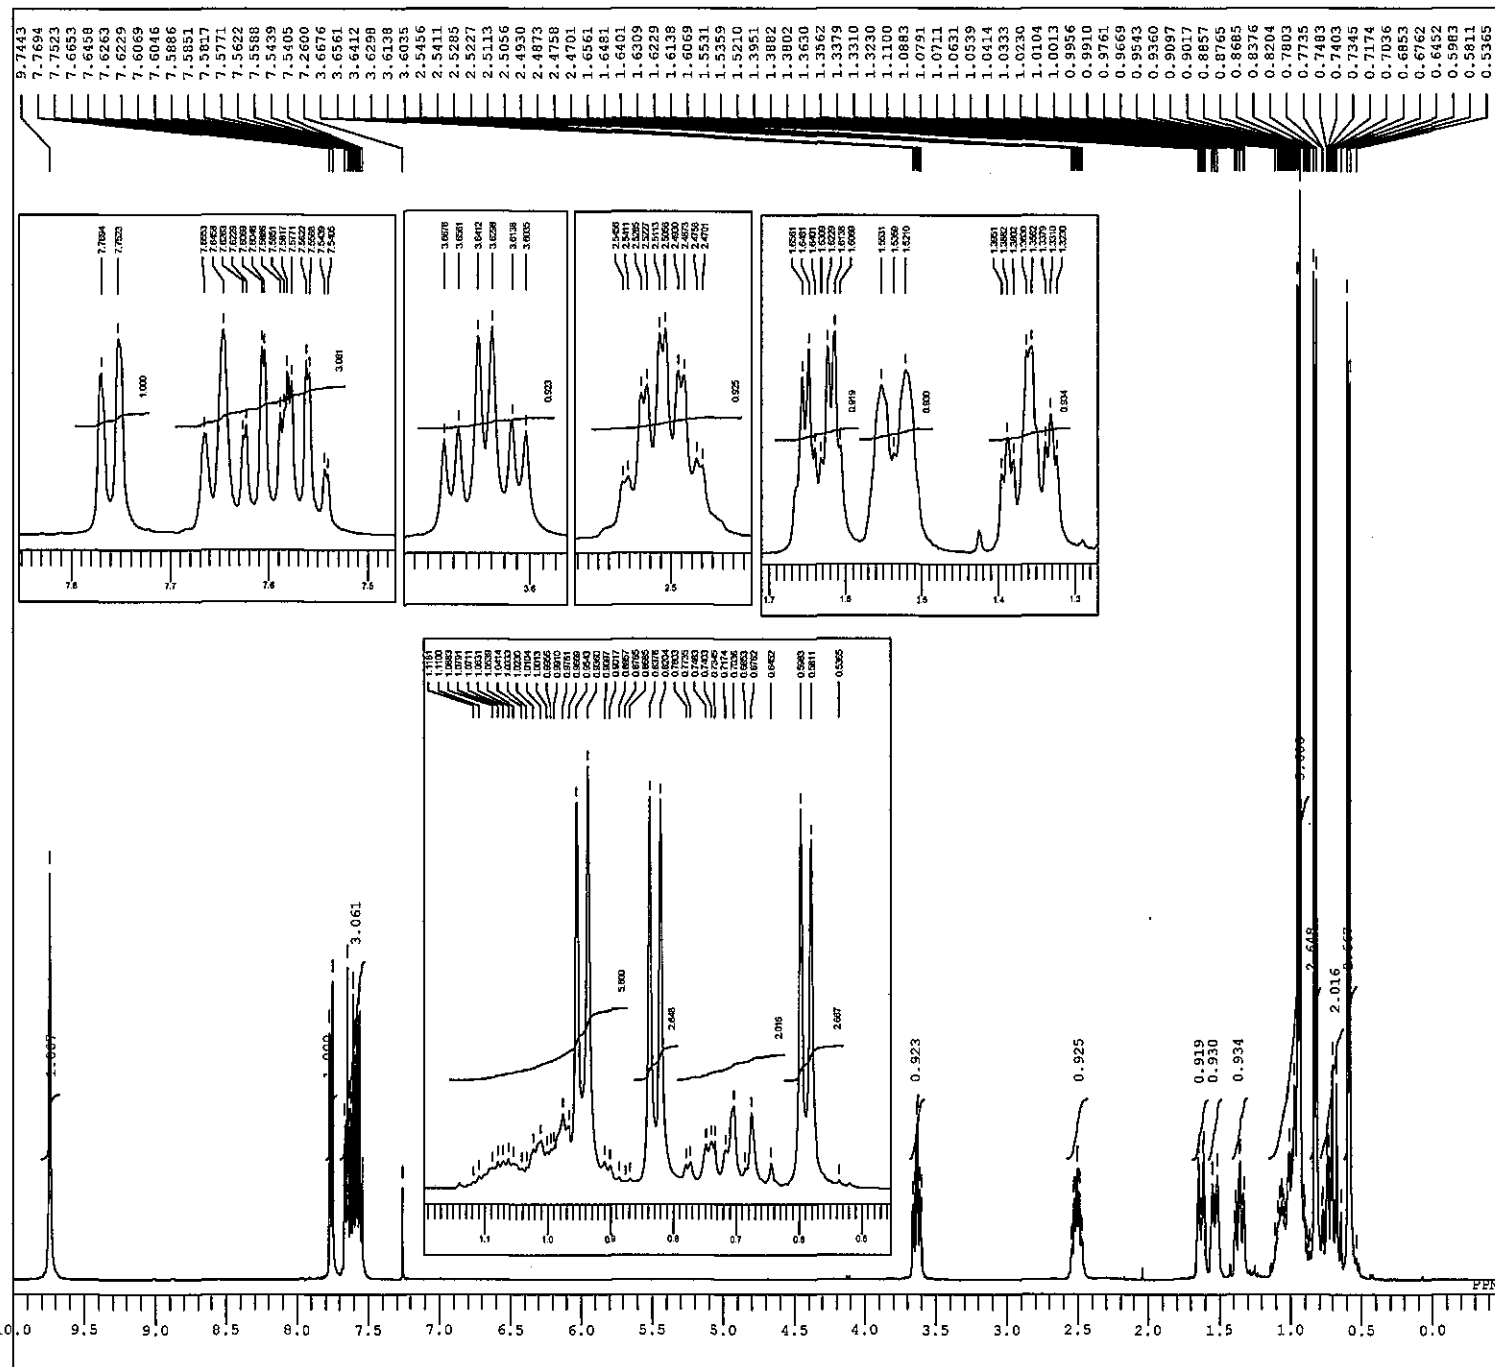

```

DFILE ozawa04-016_1_1h.jdf
COMNT menthol, OH, LP
DATIM 06-02-2014 16:11:14
OBNUC 1H
EXMOD proton.jxp
OBFREQ 391.78 MHz
OBSETE 8.51 KHz
OBFIN 3.34 Hz
POINT 16384
FREQU 7348.62 Hz
SCANS 4
ACQTM 2.2295 sec
PD 5.0000 sec
PW1 5.25 usec
IRNUC 1H
CTEMP 21.1 c
SIVNT CDCL3
EXREF 7.26 ppm
BF 0.12 Hz
RGAIN 24
    
```

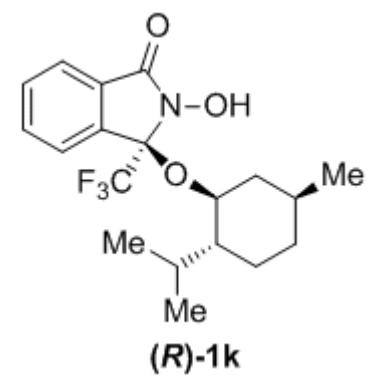

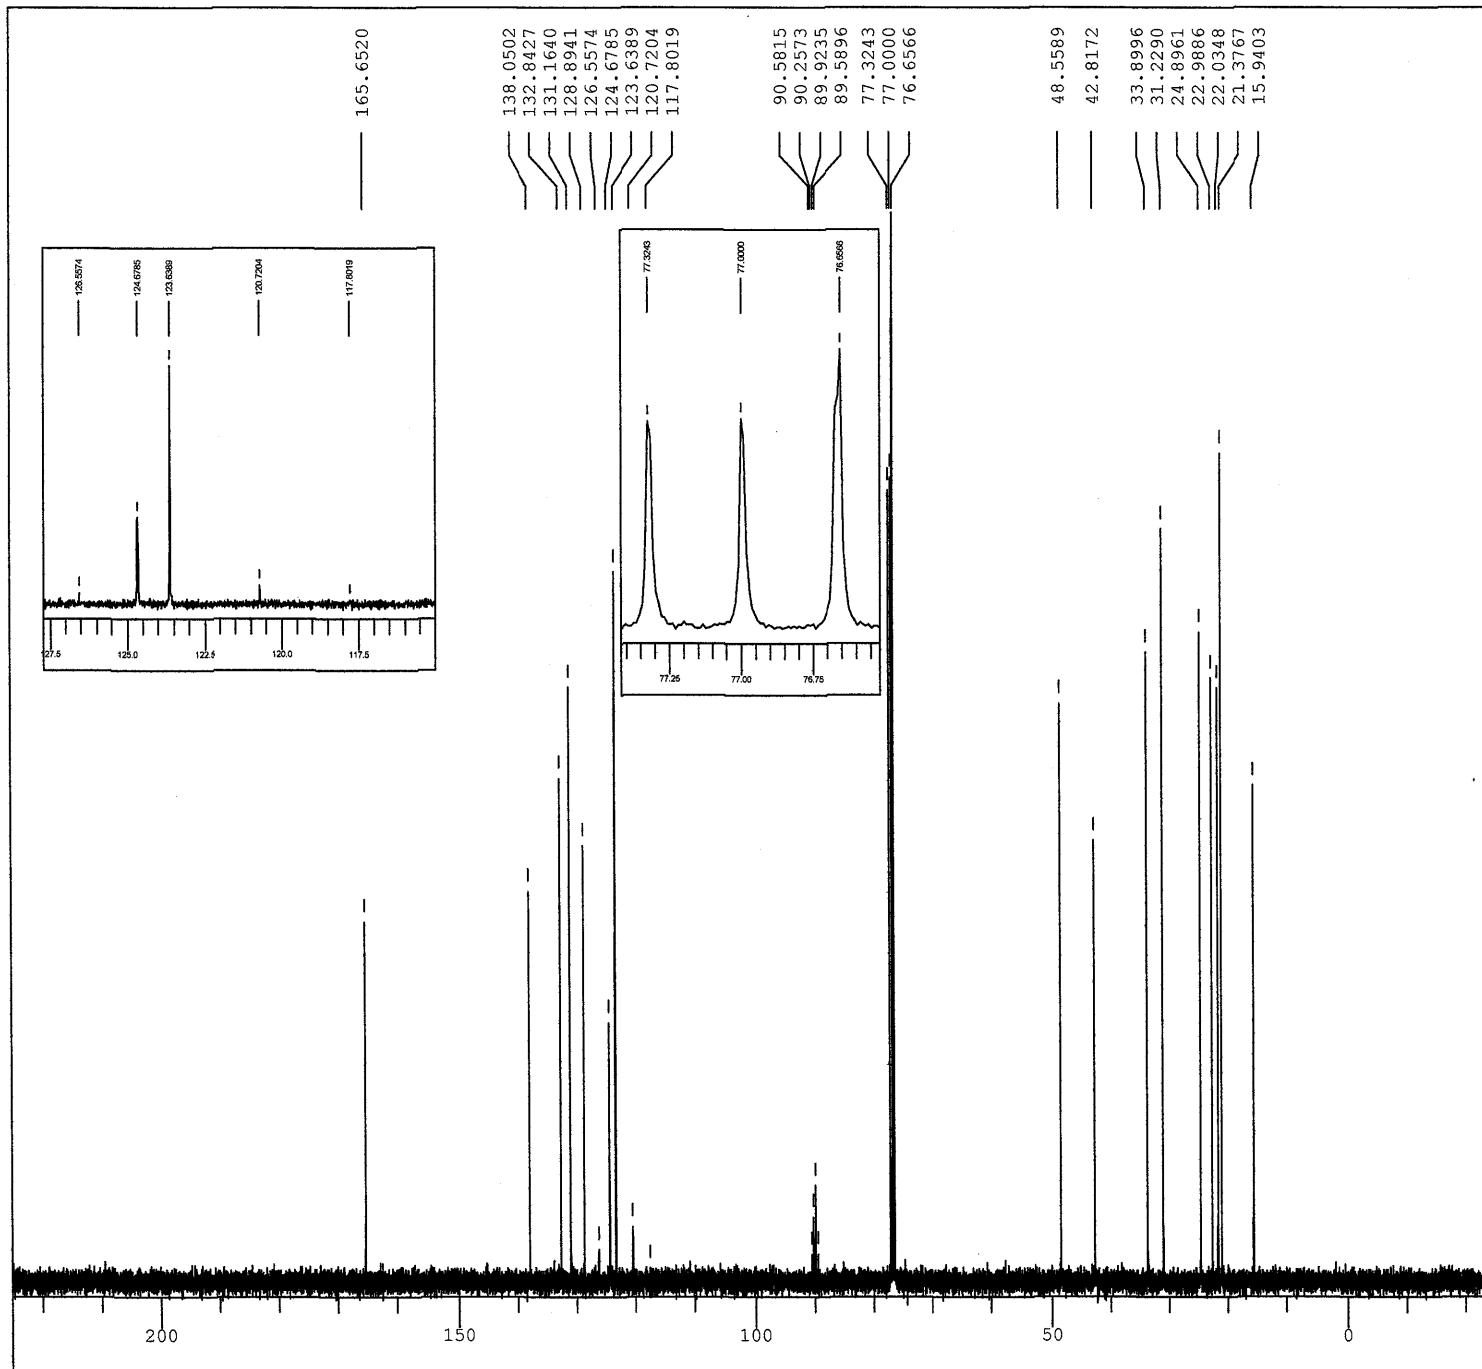

DFILE 1ma\_ozawa04-016\_1\_13C.als  
 COMNT menthol, OH, LP  
 DATIM 06-02-2014 16:12:38  
 OBNUC 13C  
 EXMOD carbon.jxp  
 OBFRQ 98.52 MHz  
 OBSET 4.64 KHz  
 OBFIN 8.74 Hz  
 POINT 26214  
 FREQU 24630.54 Hz  
 SCANS 160  
 ACQTM 1.0643 sec  
 PD 3.0000 sec  
 PW1 3.00 usec  
 IRNUC 1H  
 CTEMP 21.5 c  
 SLVNT CDCL3  
 EXREF 77.00 ppm  
 BF 0.12 Hz  
 RGAIN 60

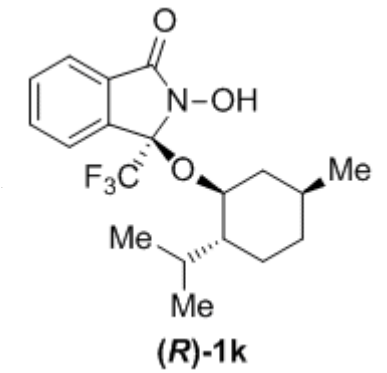



menthol, OH, LP

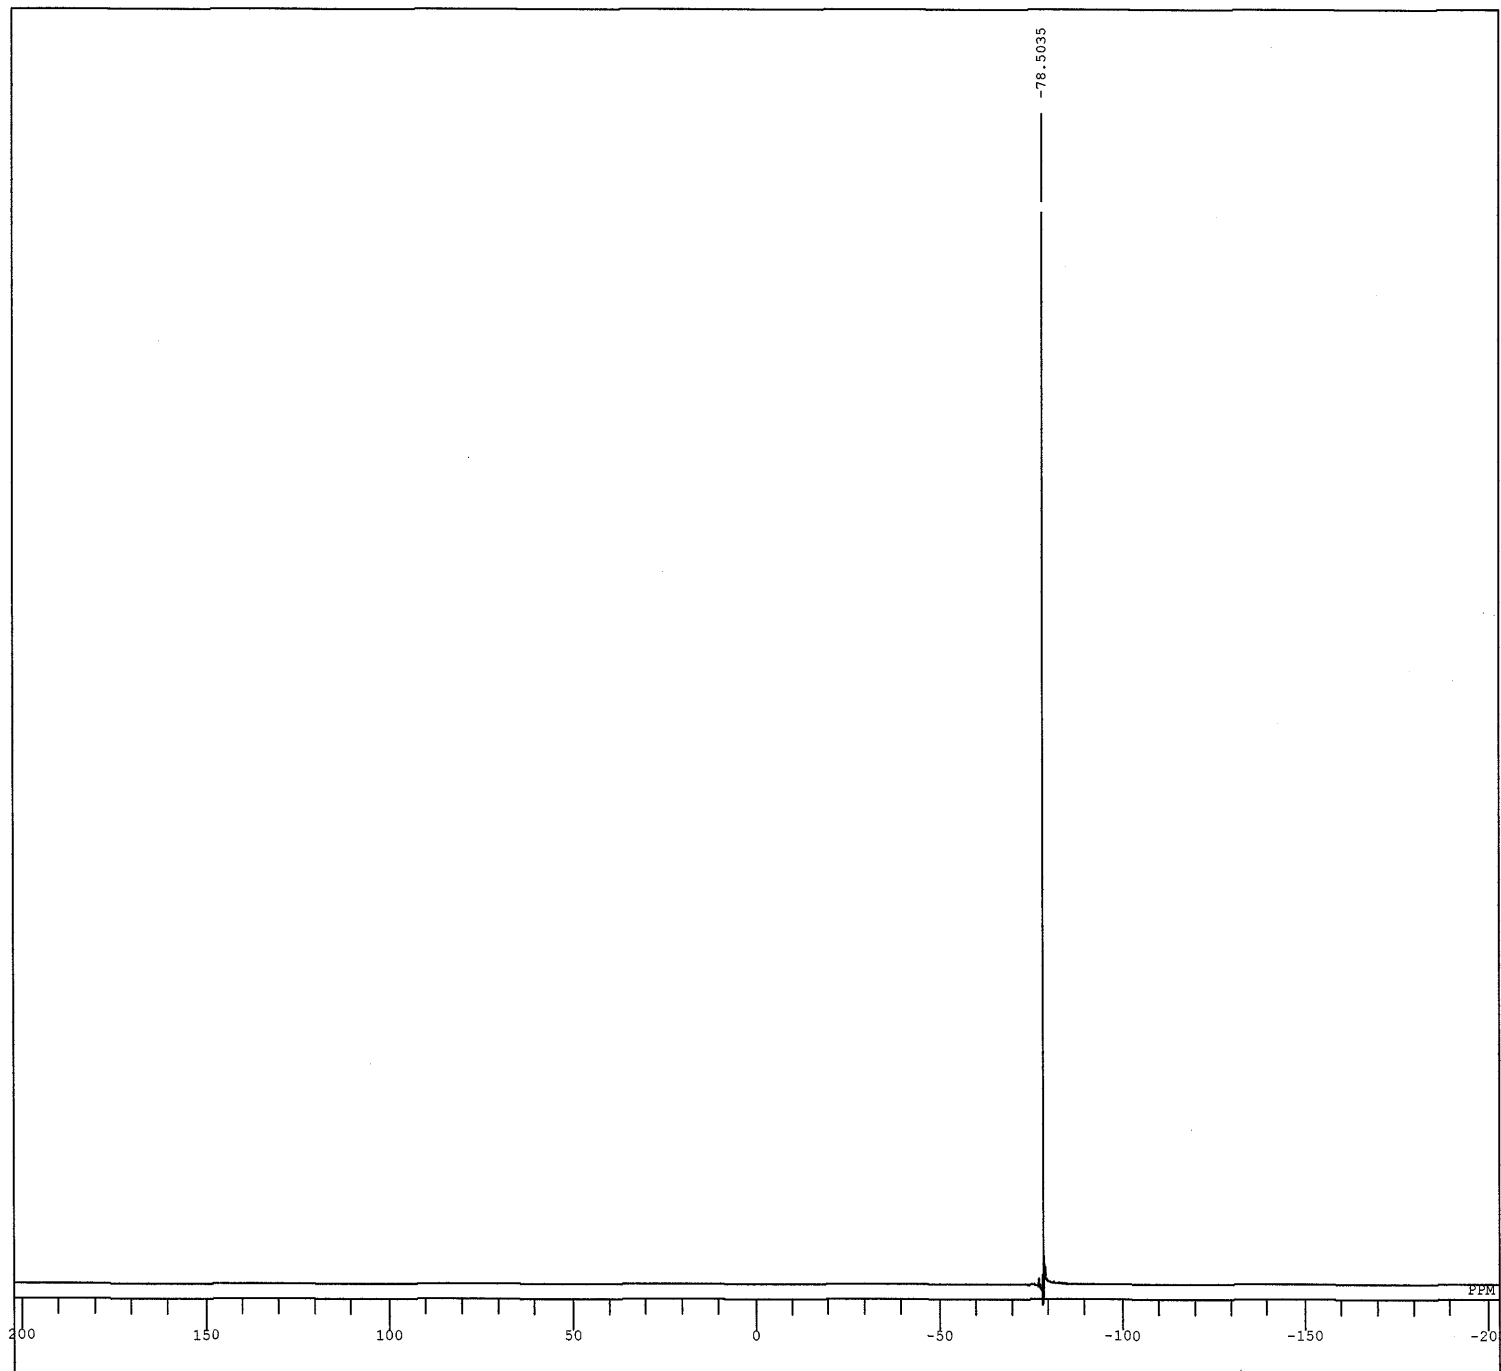

DFILE ozawa04-016\_1\_19F.jdf  
COMNT menthol, OH, LP  
DATIM 06-02-2014 16:08:51  
OBNUC 19F  
EXMOD proton.jxp  
OBFQ 368.64 MHz  
OBSET 7.63 KHz  
OBFIN 2.85 Hz  
POINT 16384  
FREQU 186567.17 Hz  
SCANS 4  
ACQTM 0.0878 sec  
PD 5.0000 sec  
PW1 3.90 usec  
IRNUC 19F  
CTEMP 21.0 c  
SLVNT CDCL3  
EXREF -164.90 ppm  
BF 0.12 Hz  
RGAIN 44

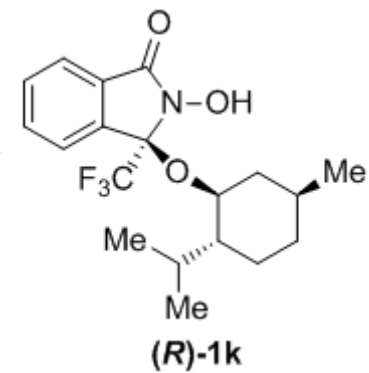

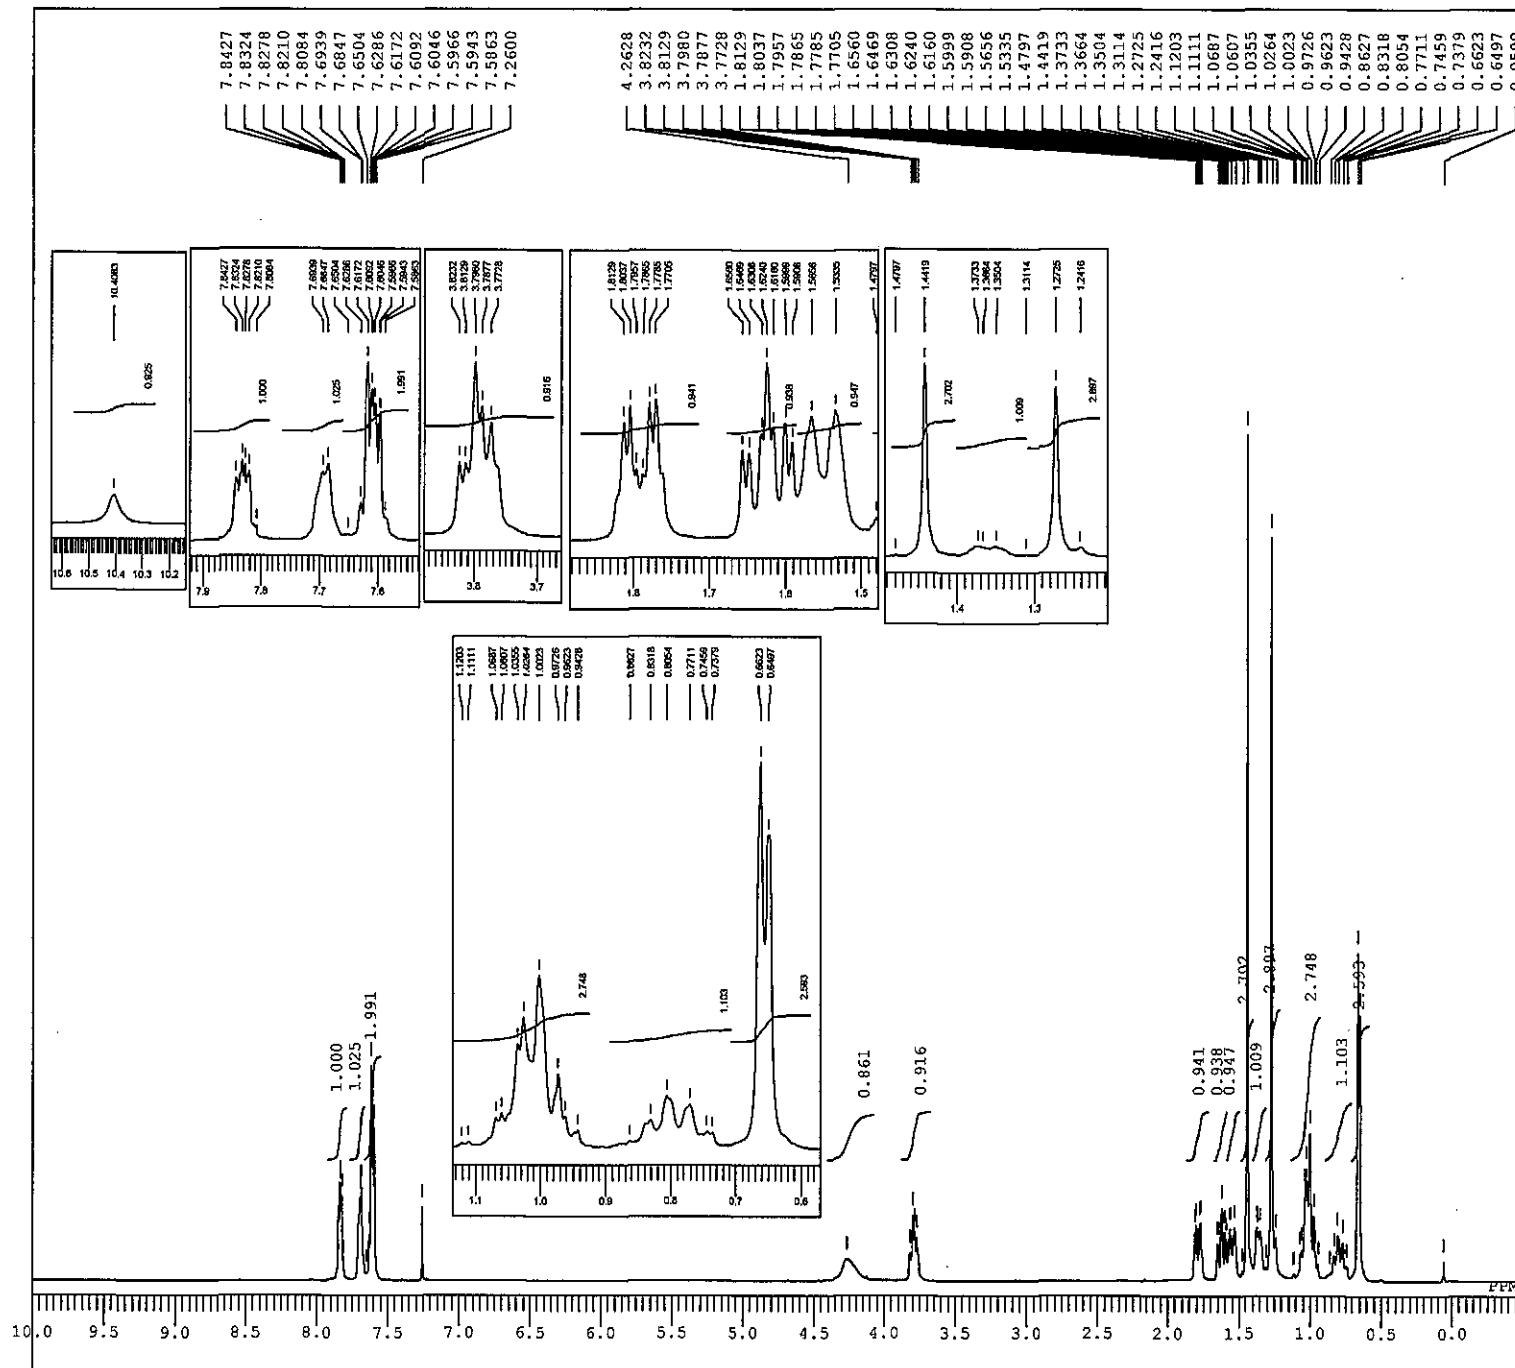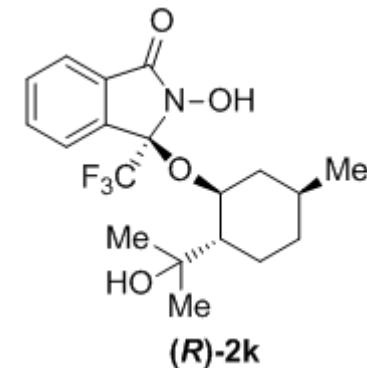

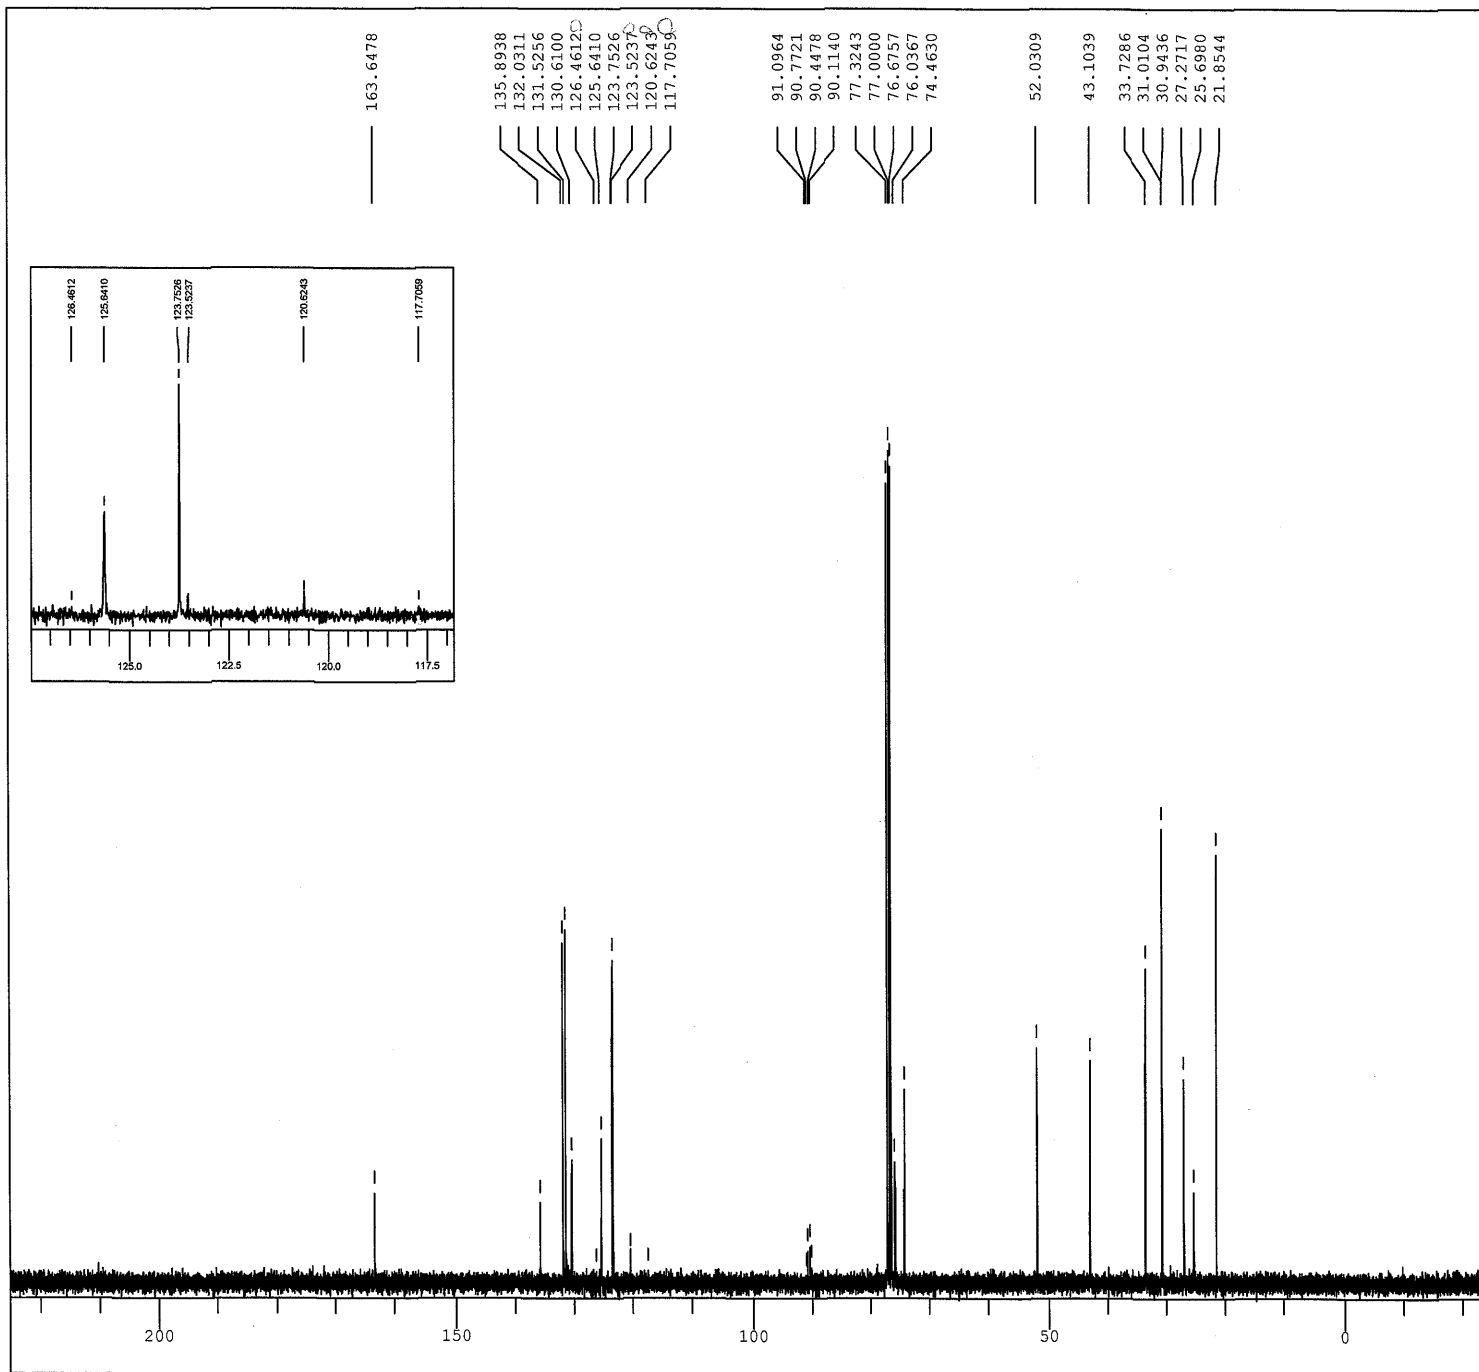

DFILE ozawa04-035\_2\_13C.jdf  
 COMNT menthol, [O], LP  
 DATIM 07-02-2014 16:41:07  
 OBNUC 13C  
 EXMOD carbon.jxp  
 OBFRQ 98.52 MHz  
 OBSET 4.64 KHz  
 OBFIN 8.74 Hz  
 POINT 32767  
 FREQU 30788.18 Hz  
 SCANS 260  
 ACQTM 1.0643 sec  
 PD 3.0000 sec  
 PW1 3.00 usec  
 IRNUC 1H  
 CTEMP 21.6 c  
 SLVNT CDCL3  
 EXREF 77.00 ppm  
 BF 0.12 Hz  
 RGAIN 60

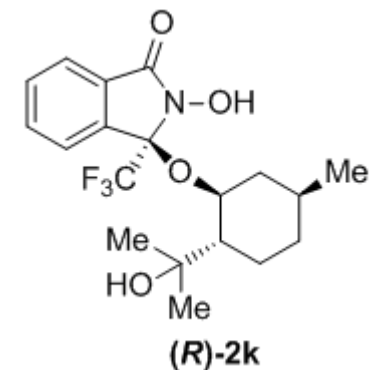

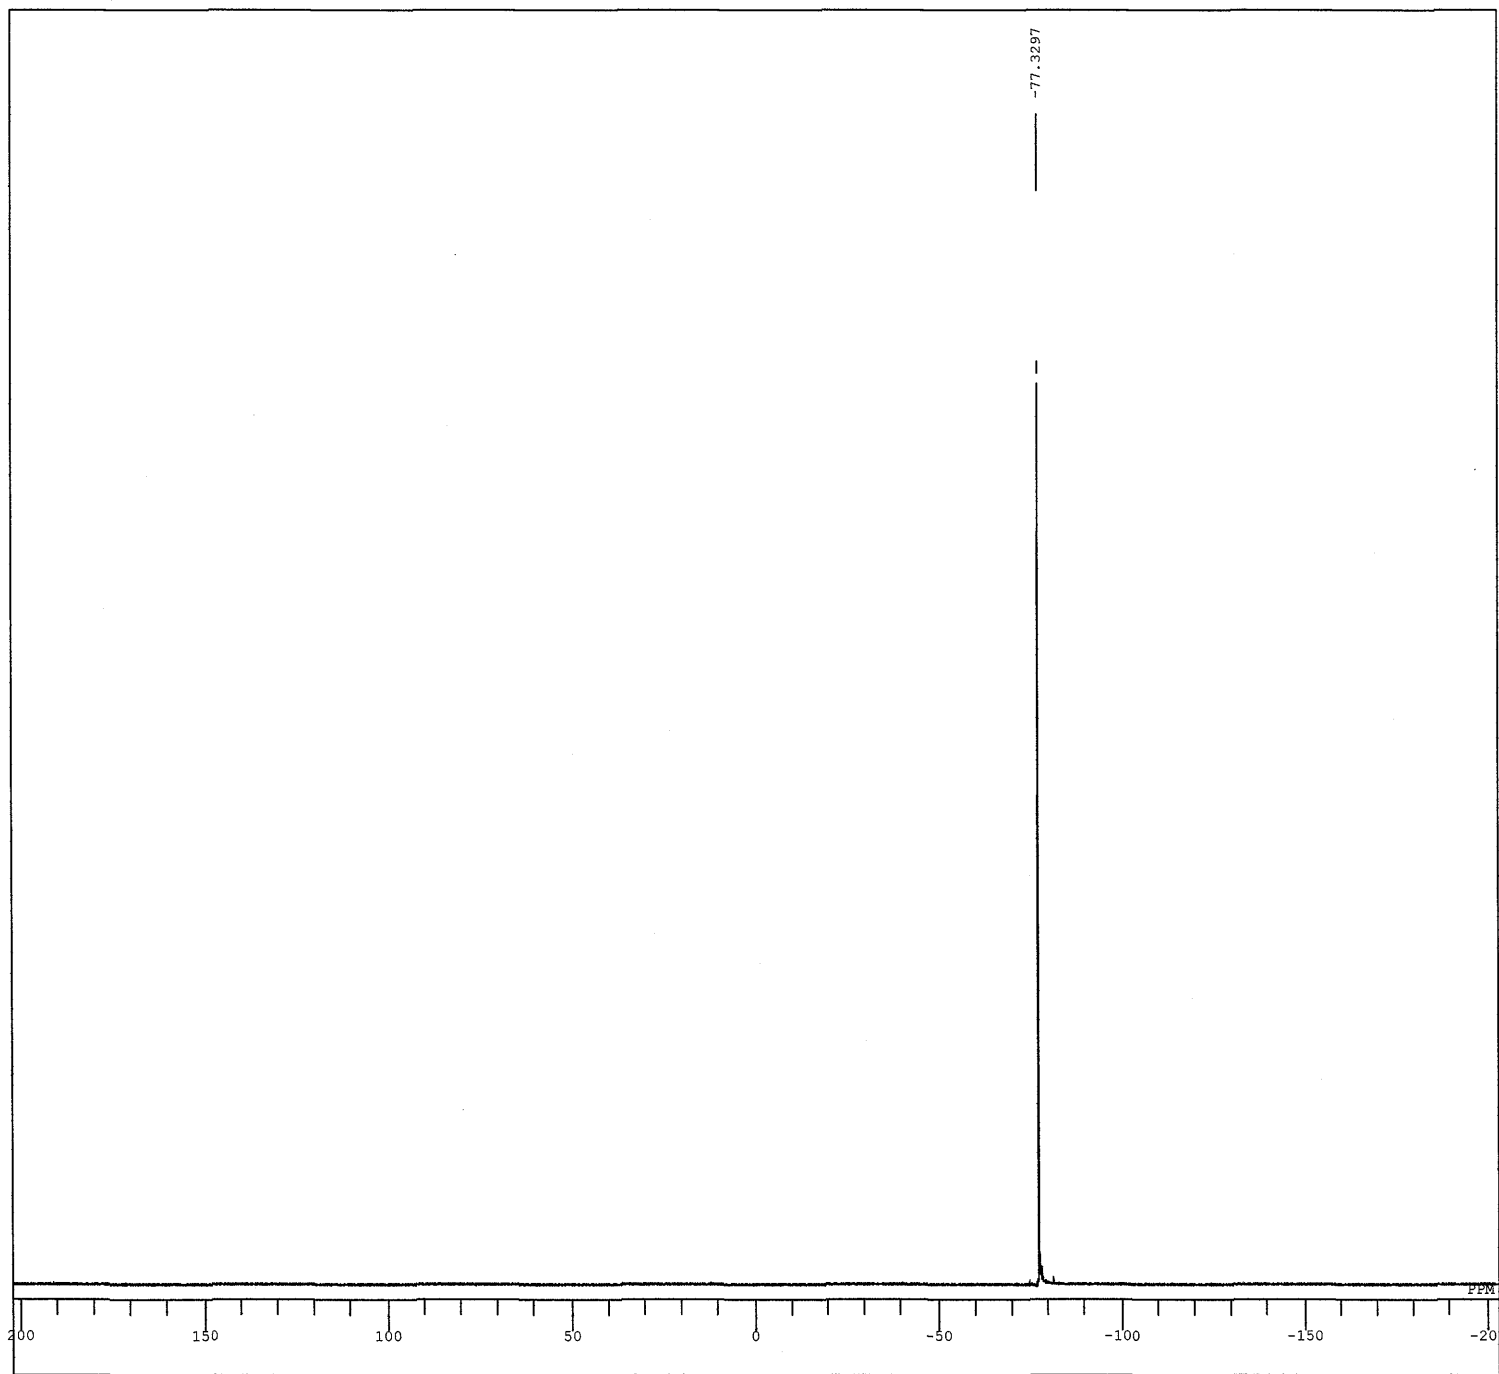

DFILE ozawa04-124\_1\_19F.jdf  
COMNT menthol, [O], LP  
DATIM 06-02-2014 19:56:06  
OBNUC 19F  
EXMOD proton.jxp  
OBFREQ 368.64 MHz  
OBSETE 7.63 KHz  
OBFIN 2.85 Hz  
POINT 16384  
FREQU 186567.17 Hz  
SCANS 4  
ACQTM 0.0878 sec  
PD 5.0000 sec  
PW1 3.90 usec  
IRNUC 19F  
CTEMP 21.3 c  
SLVNT CDCL3  
EXREF -164.90 ppm  
BF 0.12 Hz  
RGAIN 48

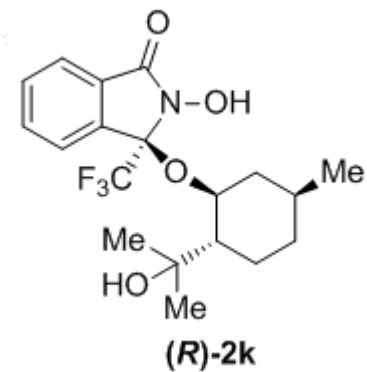

citronellol, Bn

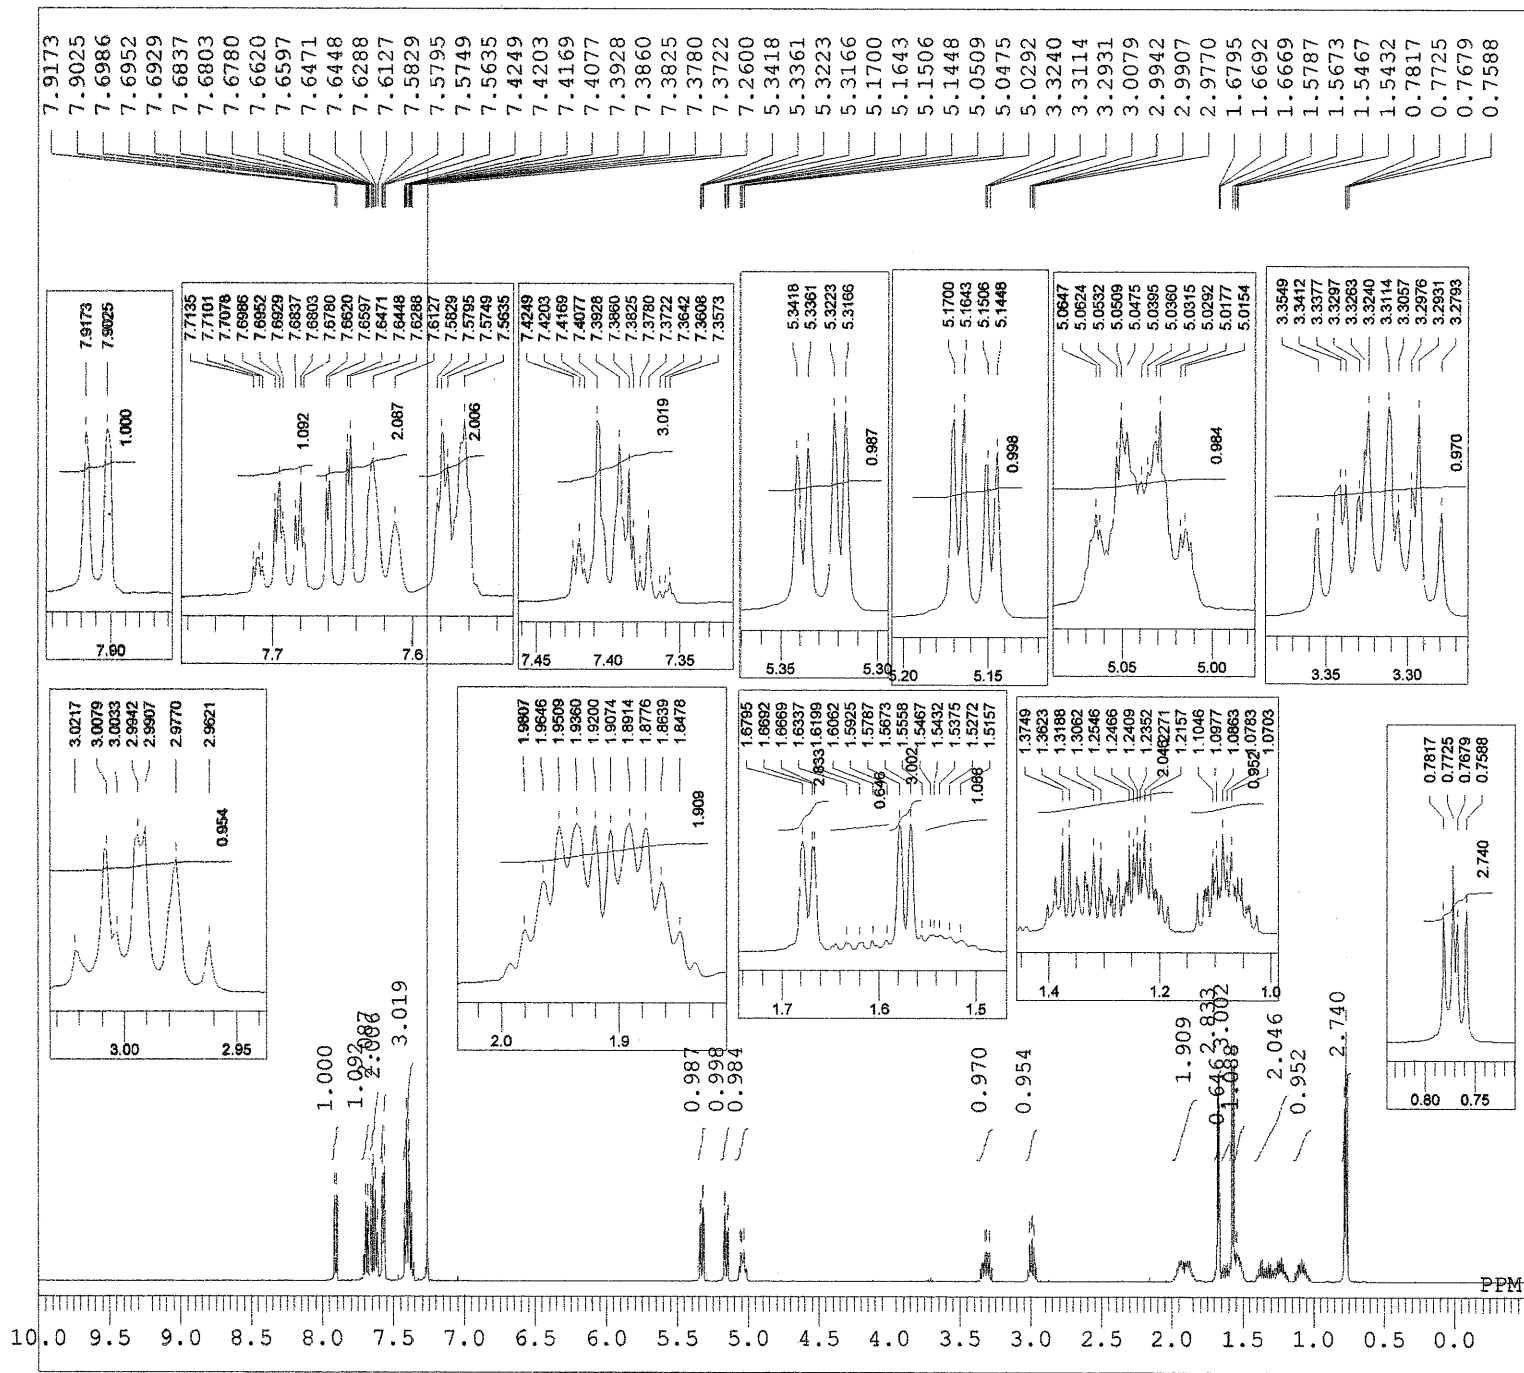

DFILE ozawa04-013\_1H.jdf  
 COMNT citronello1, Bn  
 DATIM 2014-01-16 21:35:28  
 OBNUC 1H  
 EXMOD proton.jxp  
 OBFRQ 500.16 MHz  
 OBSET 2.41 KHz  
 OBFIN 6.01 Hz  
 POINT 16384  
 FREQU 9384.38 Hz  
 SCANS 4  
 ACQTM 1.7459 sec  
 PD 5.0000 sec  
 PW1 5.55 usec  
 IRNUC 1H  
 CTEMP 21.2 c  
 SLVNT CDCL3  
 EXREF 7.26 ppm  
 BF 0.12 Hz  
 RGAIN 24

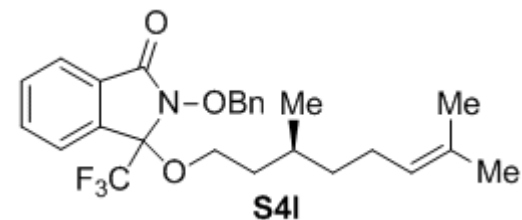

citronellol, Bn

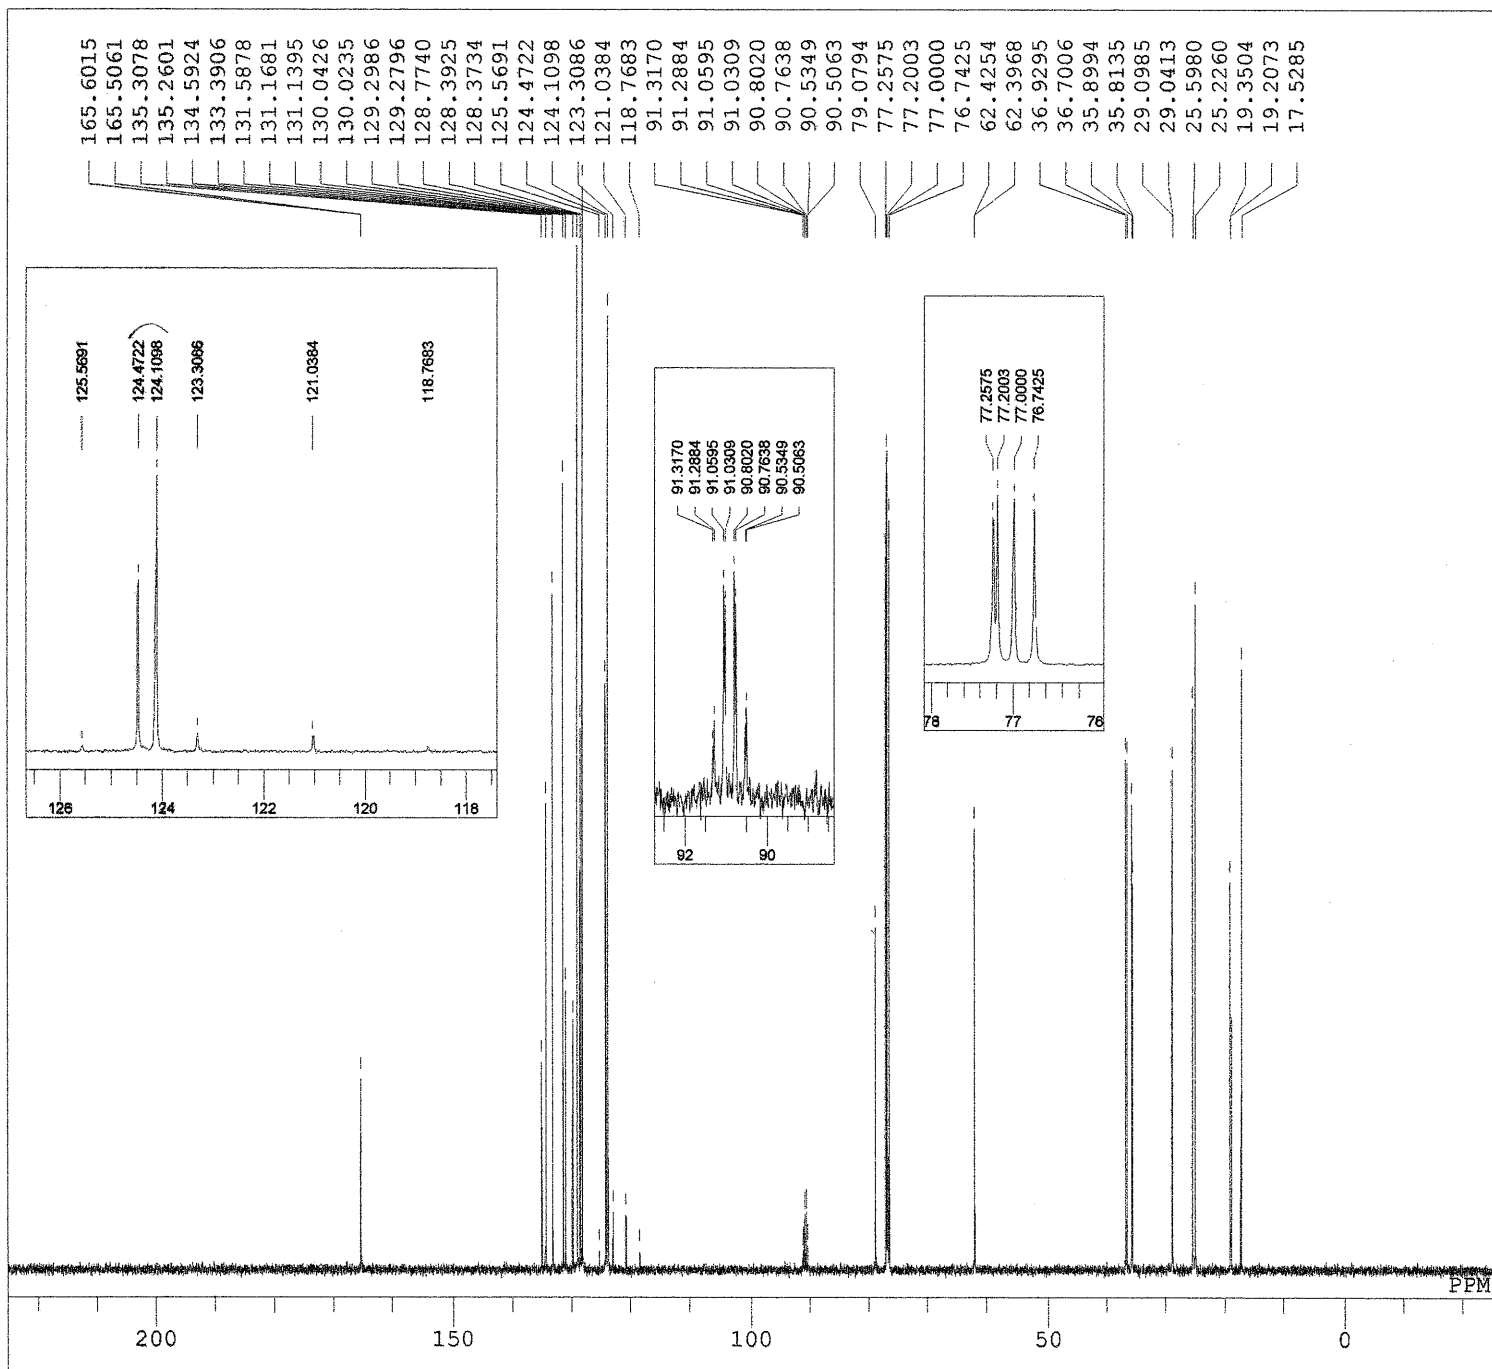

DFILE ozawa04-013\_13C.jdf  
COMNT citronellol, Bn  
DATIM 2014-01-16 21:36:30  
OBNUC 13C  
EXMOD carbon.jxp  
OBFRO 125.77 MHz  
OBSET 7.87 KHz  
OBFIN 4.21 Hz  
POINT 32767  
FREQU 39308.18 Hz  
SCANS 352  
ACQTM 0.8336 sec  
PD 3.0000 sec  
PW1 3.40 usec  
IRNUC 1H  
CTEMP 21.4 c  
SLVNT CDCL3  
EXREF 77.00 ppm  
BF 1.00 Hz  
RGAIN 60

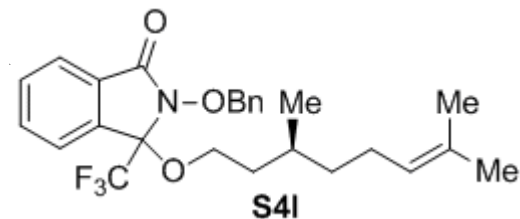

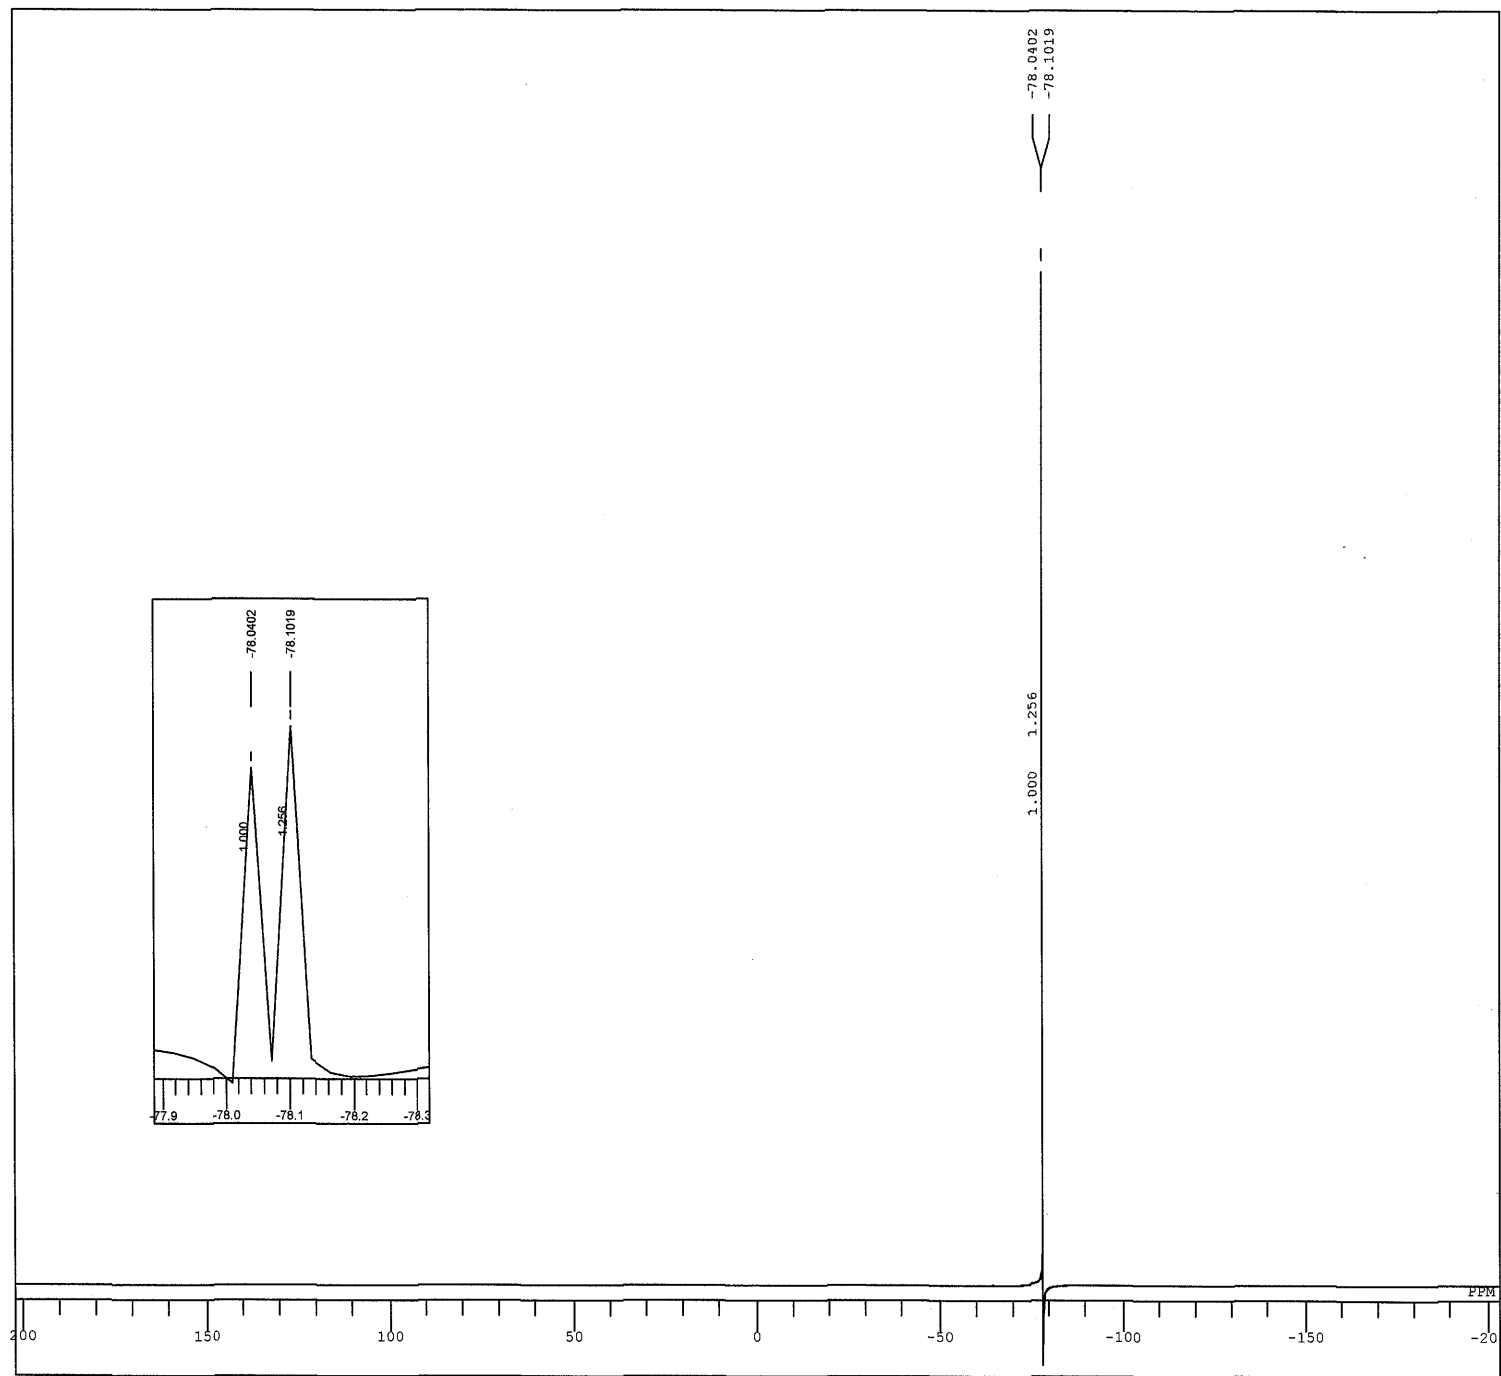

```

DFILE ozawa04-013 19F.jdf
COMNT citronello1, Bn
DATIM 16-01-2014 22:31:18
OBNUC 19F
EXMOD proton.jxp
OBFREQ 368.64 MHz
OBSETE 7.63 KHz
OBFIN 2.85 Hz
POINT 16384
FREQU 186567.17 Hz
SCANS 4
ACQTM 0.0878 sec
PD 5.0000 sec
PW1 3.90 usec
IRNUC 19F
CTEMP 21.2 c
SLVNT CDCL3
EXREF -164.90 ppm
BF 0.12 Hz
RGAIN 44
    
```

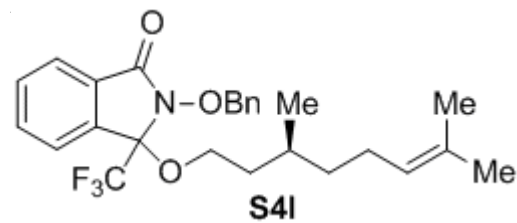

citr., OH

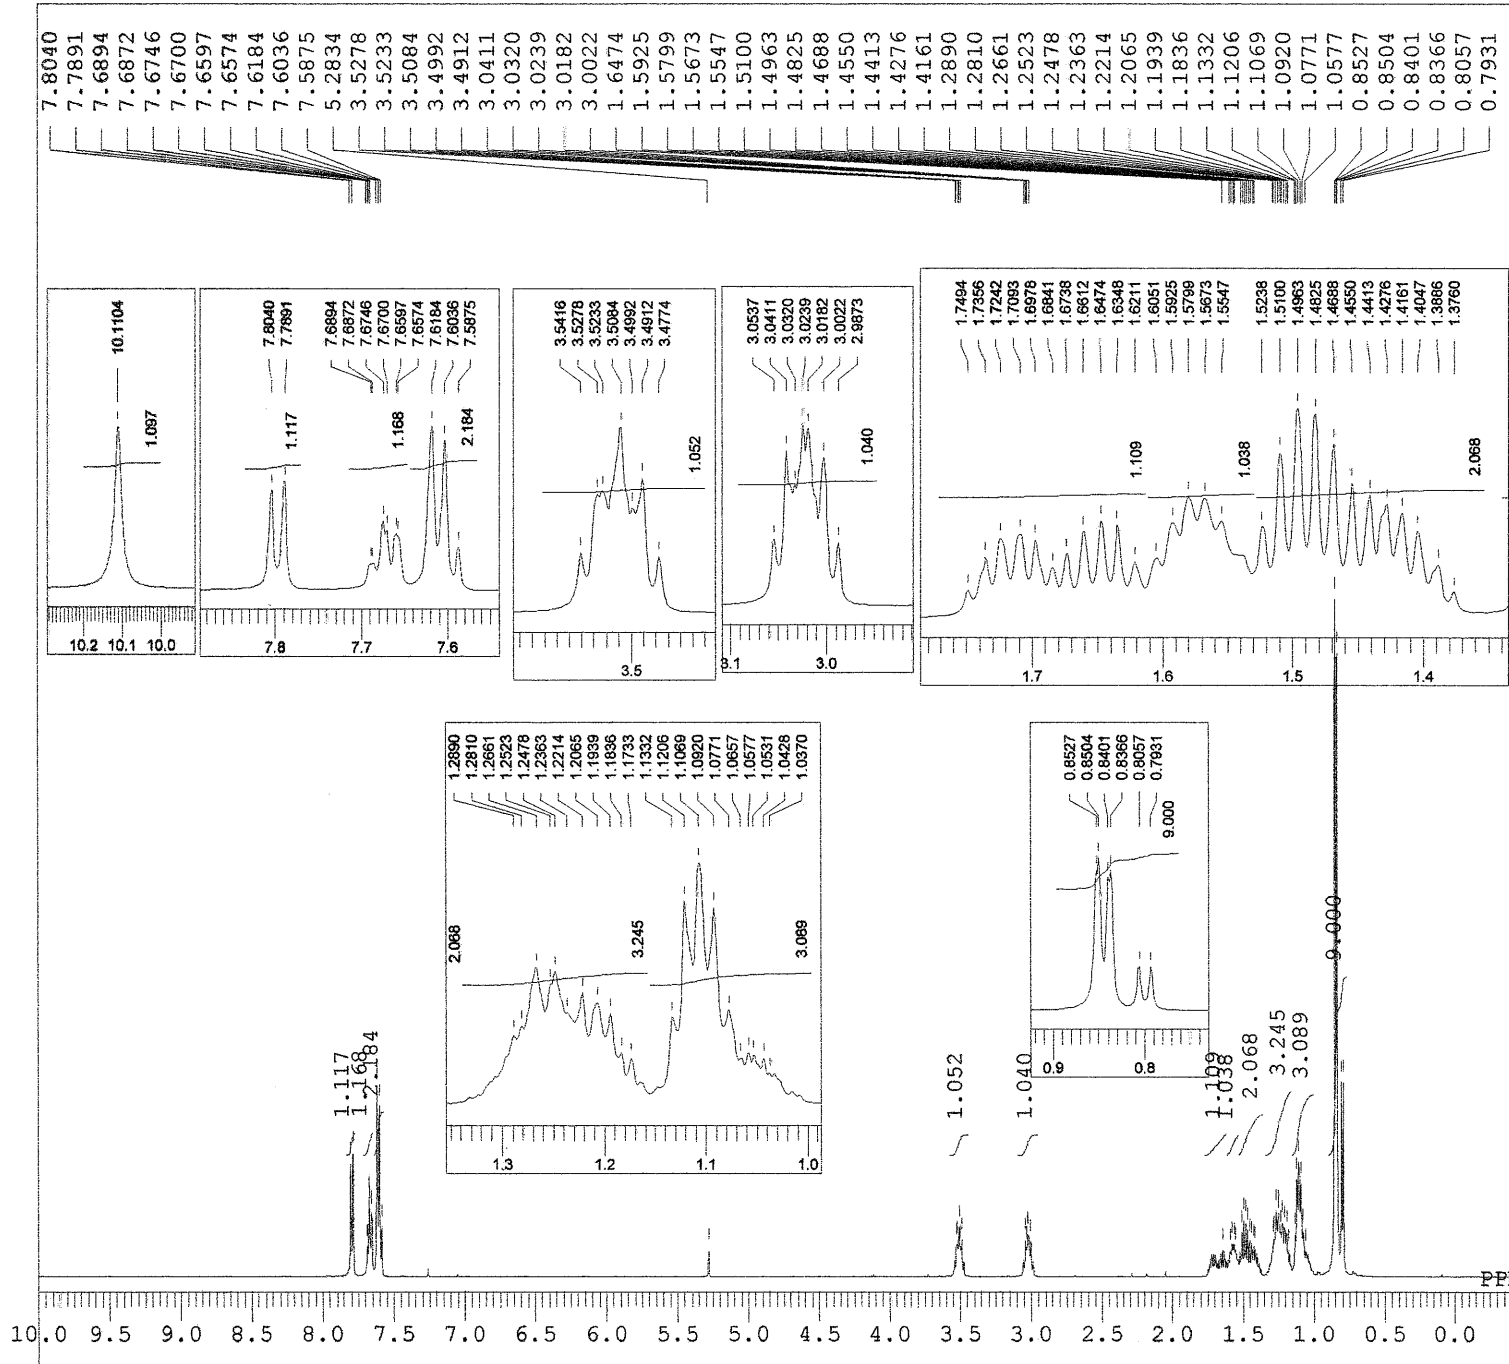

DFILE ozawa04-017\_1H.jdf  
COMNT citr., OH  
DATIM 2014-01-25 17:42:01  
OBNUC 1H  
EXMOD proton.jxp  
OBFRQ 500.16 MHz  
OBSET 2.41 KHz  
OBFIN 6.01 Hz  
POINT 16384  
FREQU 9384.38 Hz  
SCANS 4  
ACQTM 1.7459 sec  
PD 5.0000 sec  
PW1 5.55 usec  
IRNUC 1H  
CTEMP 21.5 c  
SLVNT CDCL3  
EXREF 7.26 ppm  
BF 1.00 Hz  
RGAIN 20

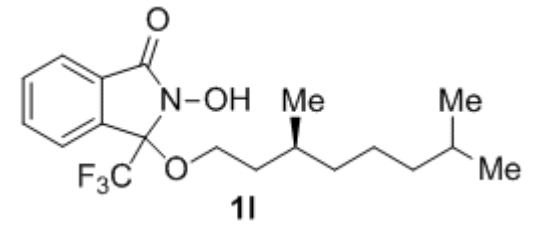



citr., OH

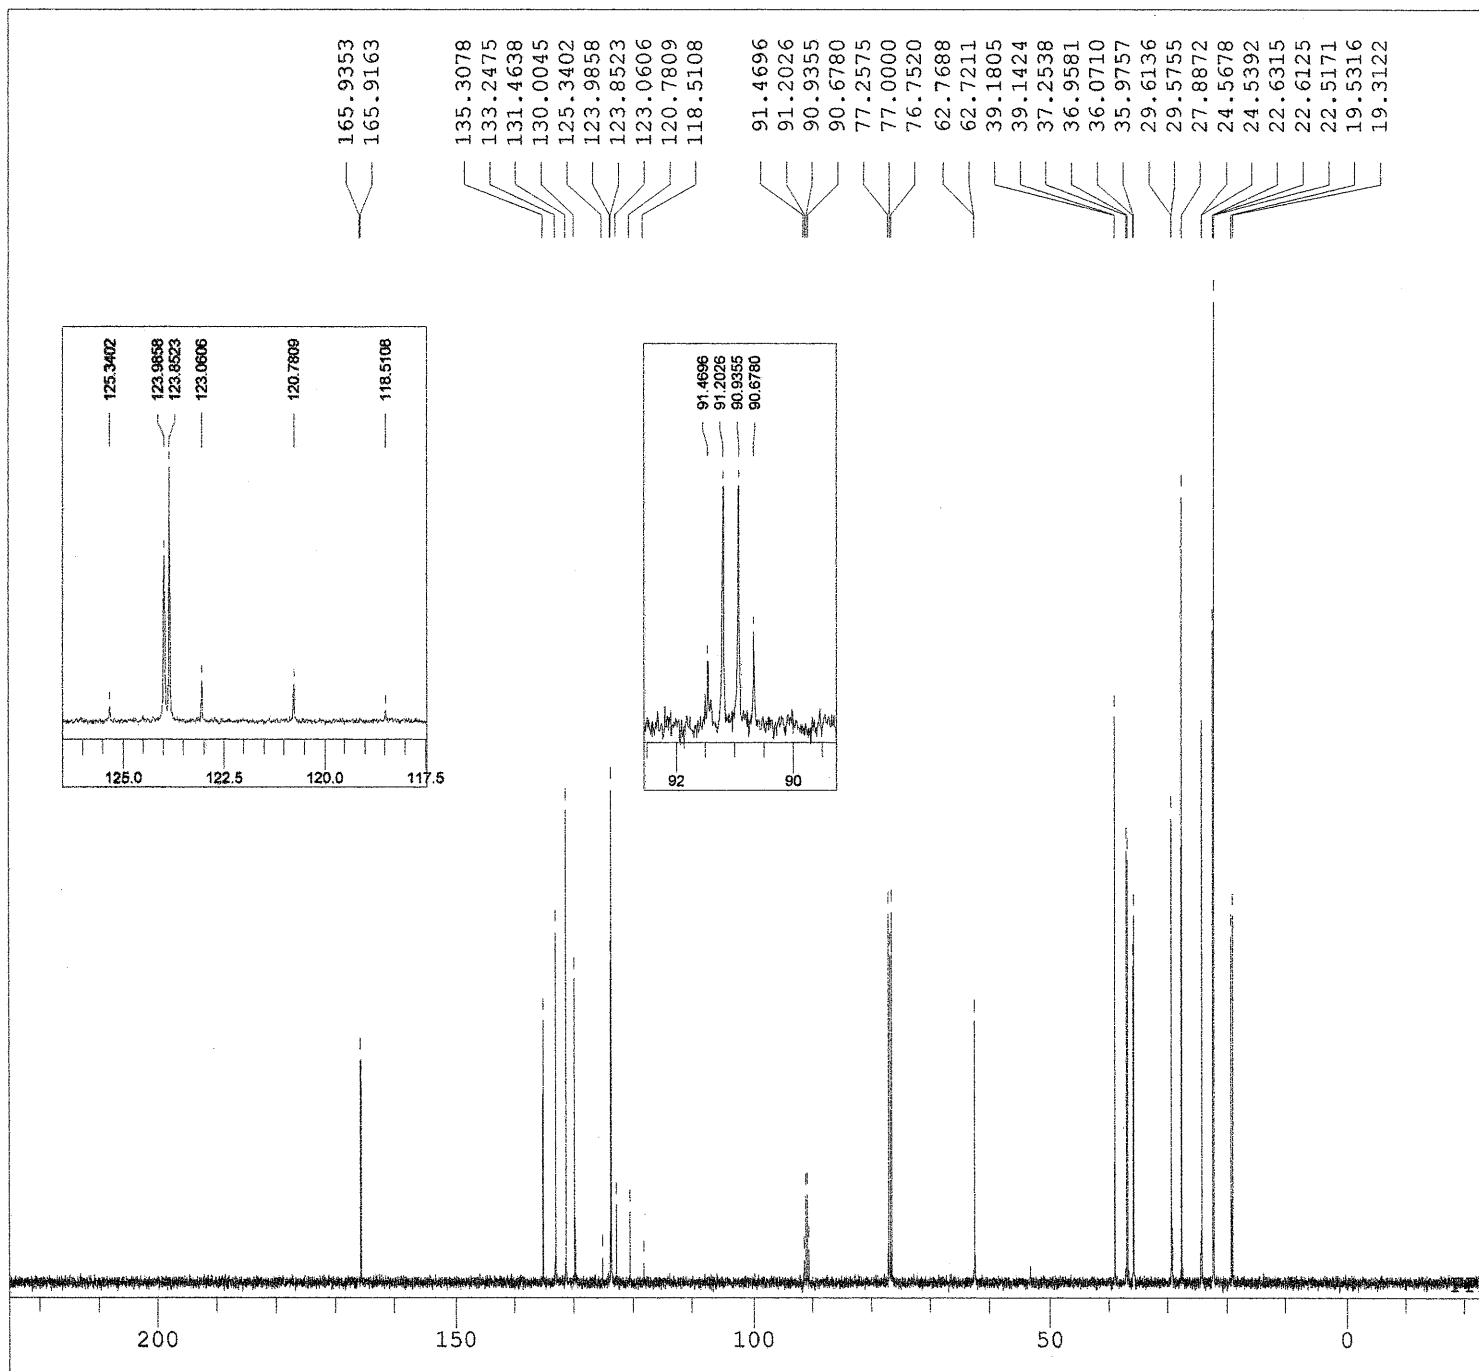

DFILE ozawa04-017\_13C.jdf  
COMNT citr., OH  
DATIM 2014-01-25 17:43:04  
OBNUC 13C  
EXMOD carbon.jxp  
OBFRQ 125.77 MHz  
OBSET 7.87 KHz  
OBFIN 4.21 Hz  
POINT 32767  
FREQU 39308.18 Hz  
SCANS 64  
ACQTM 0.8336 sec  
PD 3.0000 sec  
PW1 3.40 usec  
IRNUC 1H  
CTEMP 21.9 c  
SLVNT CDCL3  
EXREF 77.00 ppm  
BF 1.00 Hz  
RGAIN 60

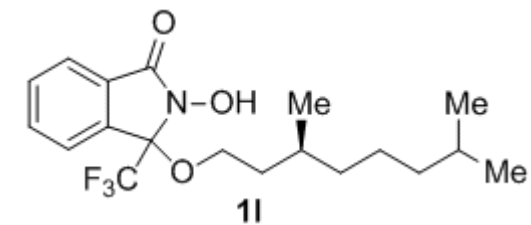

citr., OH

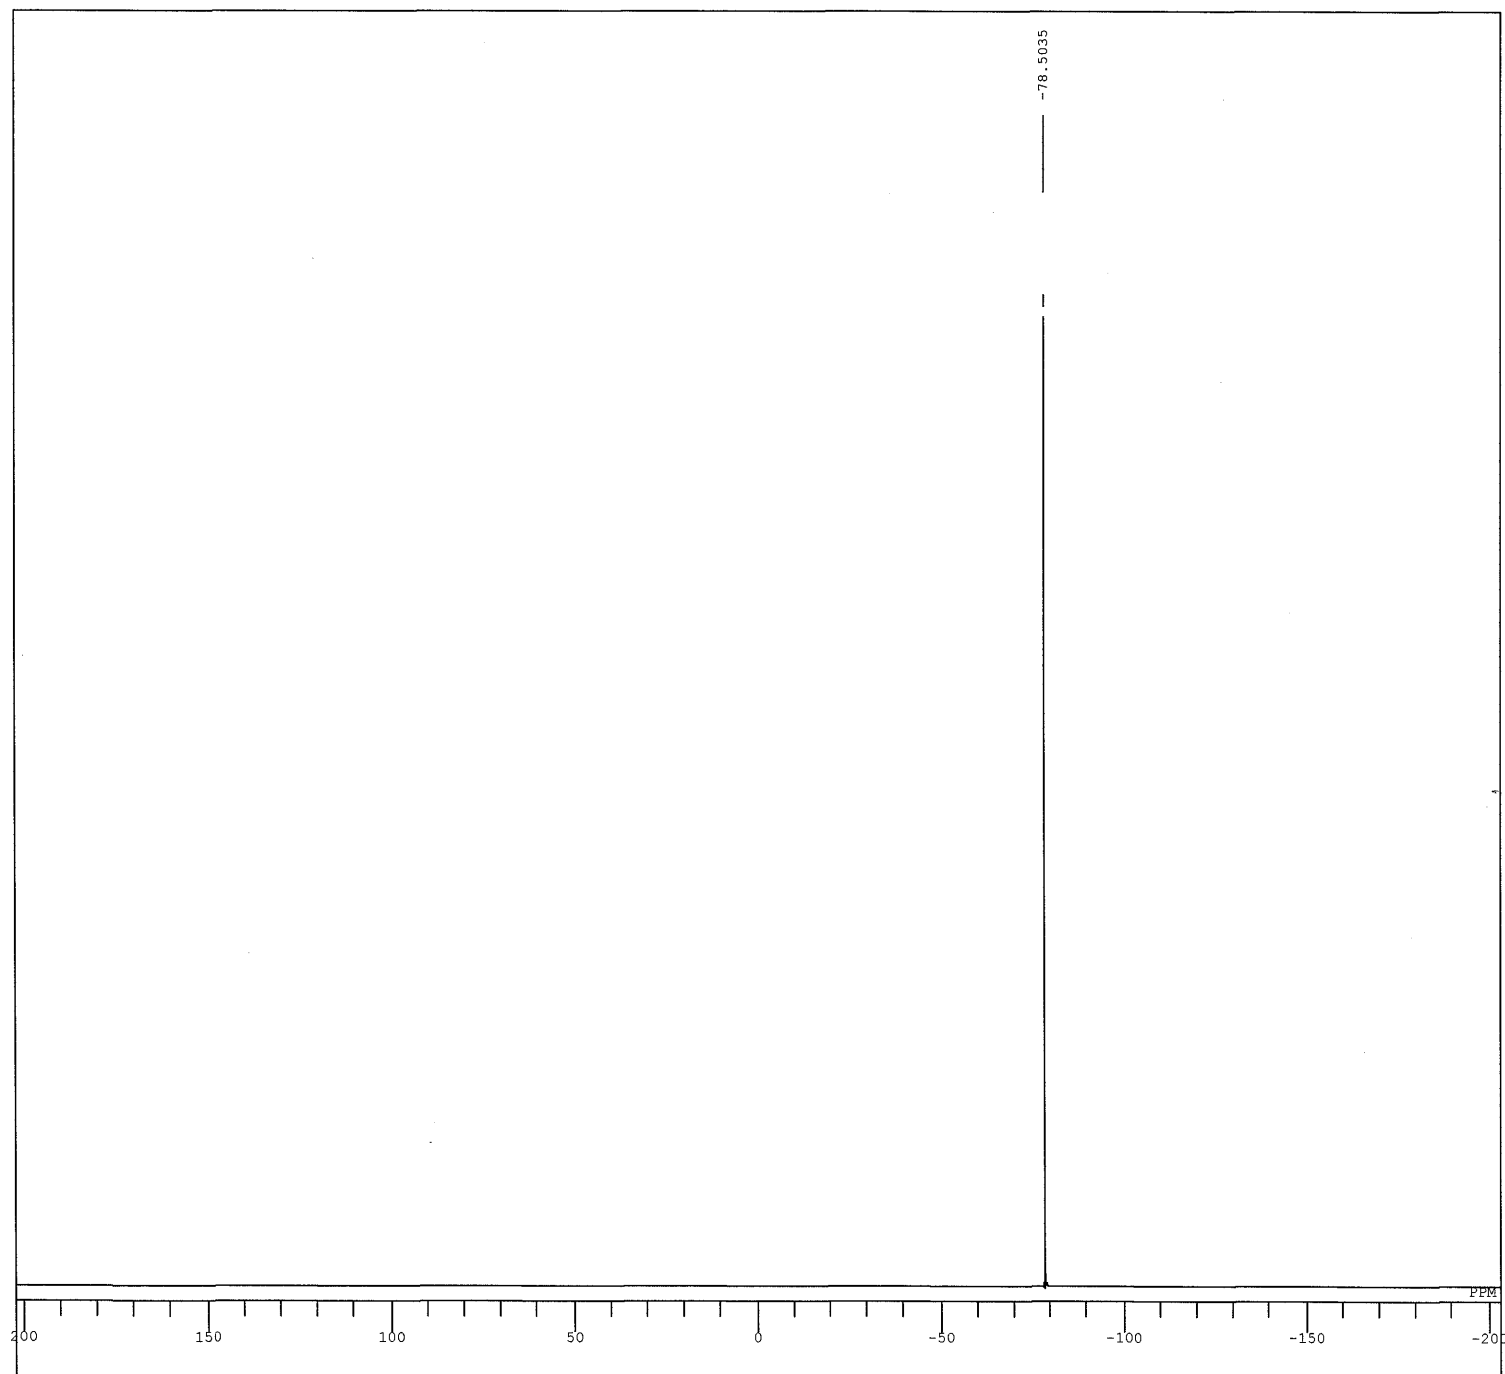

DFILE 1h\_ozawa04-017\_19F.jdf  
COMNT citr., OH  
DATIM 25-01-2014 18:16:27  
OBNUC 19F  
EXMOD proton.jxp  
OBFREQ 368.64 MHz  
OBSET 7.63 KHz  
OBFIN 2.85 Hz  
POINT 16384  
FREQU 186567.17 Hz  
SCANS 4  
ACQTM 0.0878 sec  
PD 5.0000 sec  
PW1 3.90 usec  
IRNUC 19F  
CTEMP 20.9 c  
SLVNT CDCL3  
EXREF -164.90 ppm  
BF 0.12 Hz  
RGAIN 40

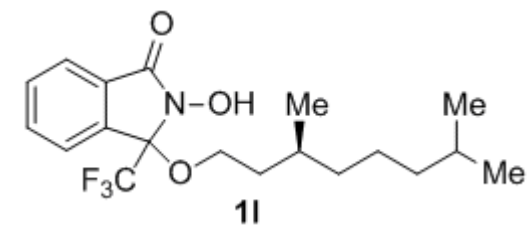

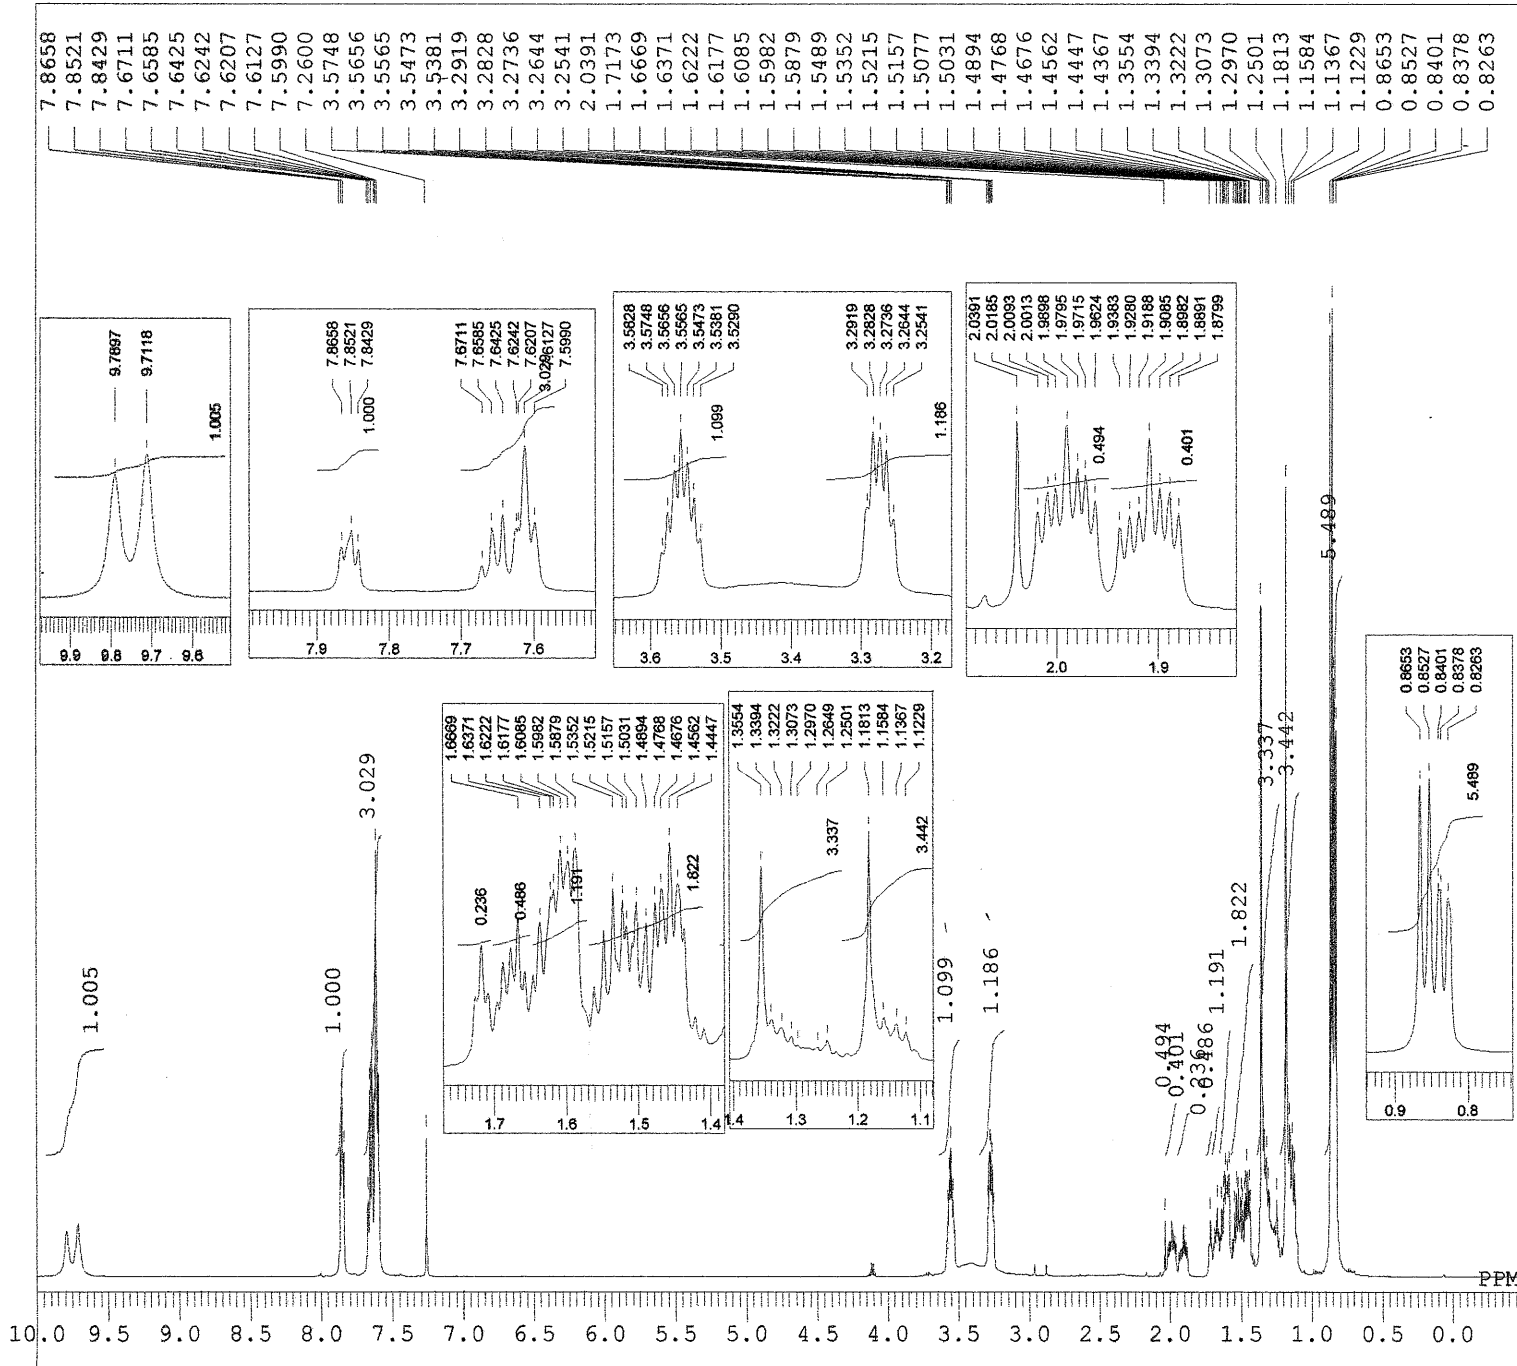

DFILE ozawa04-095\_2a\_1H.jdf  
 COMNT PTLC, citr., 02  
 DATIM 2014-01-20 17:38:20  
 OBNUC 1H  
 EXMOD proton.jxp  
 OBFRQ 500.16 MHz  
 OBSET 2.41 KHz  
 OBFIN 6.01 Hz  
 POINT 16384  
 FREQU 9384.38 Hz  
 SCANS 4  
 ACQTM 1.7459 sec  
 PD 5.0000 sec  
 PW1 5.55 usec  
 IRNUC 1H  
 CTEMP 21.0 c  
 SLVNT CDCL3  
 EXREF 7.26 ppm  
 BF 1.00 Hz  
 RGAIN 30

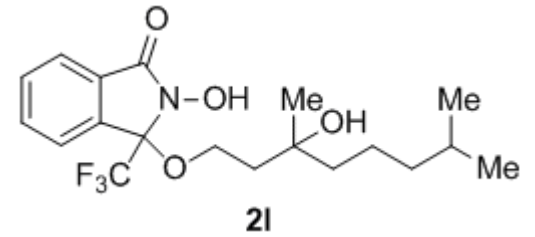

citr., [0]

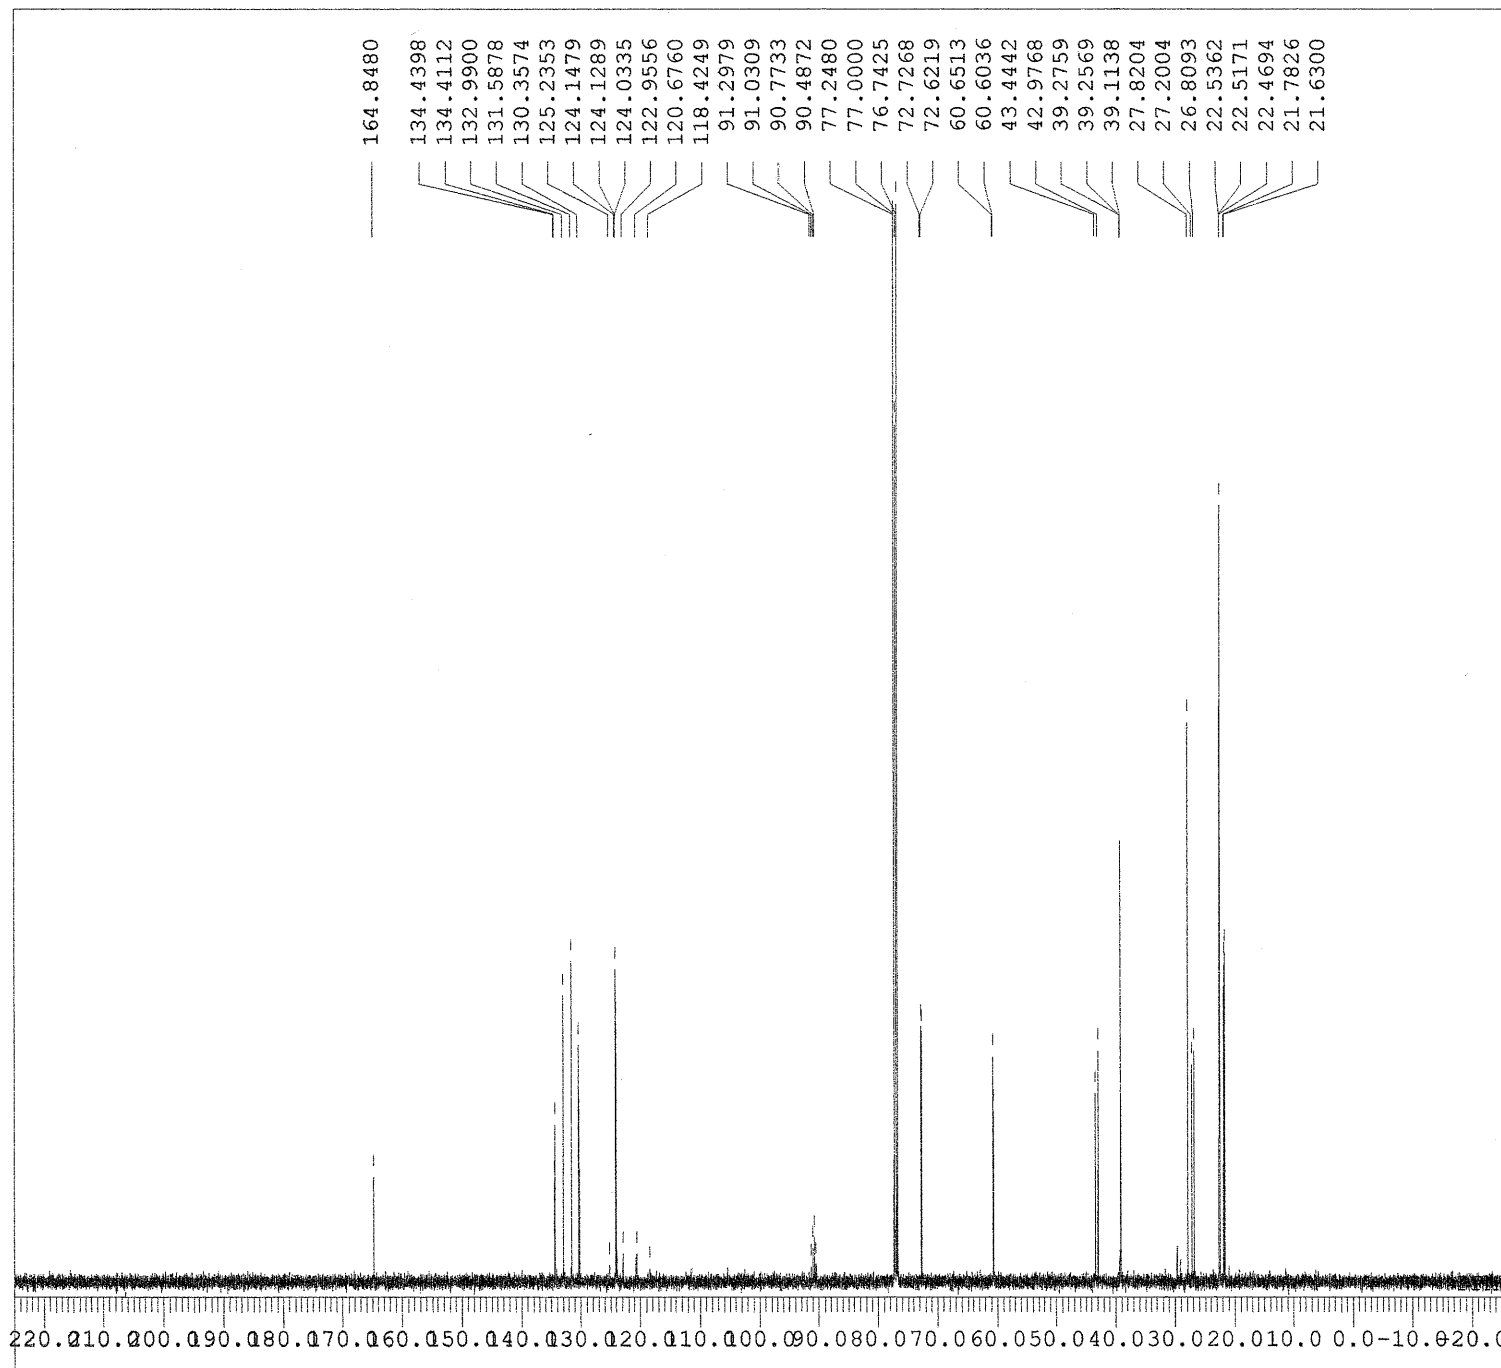

DFILE ozawa04-095\_2\_13C.jdf  
COMNT citr., [0]  
DATIM 2014-01-26 13:46:45  
OBNUC 13C  
EXMOD carbon.jxp  
OBFRQ 125.77 MHz  
OBSET 7.87 KHz  
OBFIN 4.21 Hz  
POINT 32767  
FREQU 39308.18 Hz  
SCANS 464  
ACQTM 0.8336 sec  
PD 3.0000 sec  
PW1 3.40 usec  
IRNUC 1H  
CTEMP 21.7 c  
SLVNT CDCL3  
EXREF 77.00 ppm  
BF 0.12 Hz  
RGAIN 60

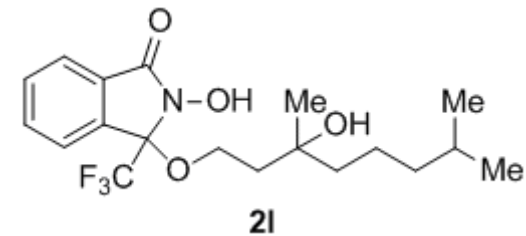

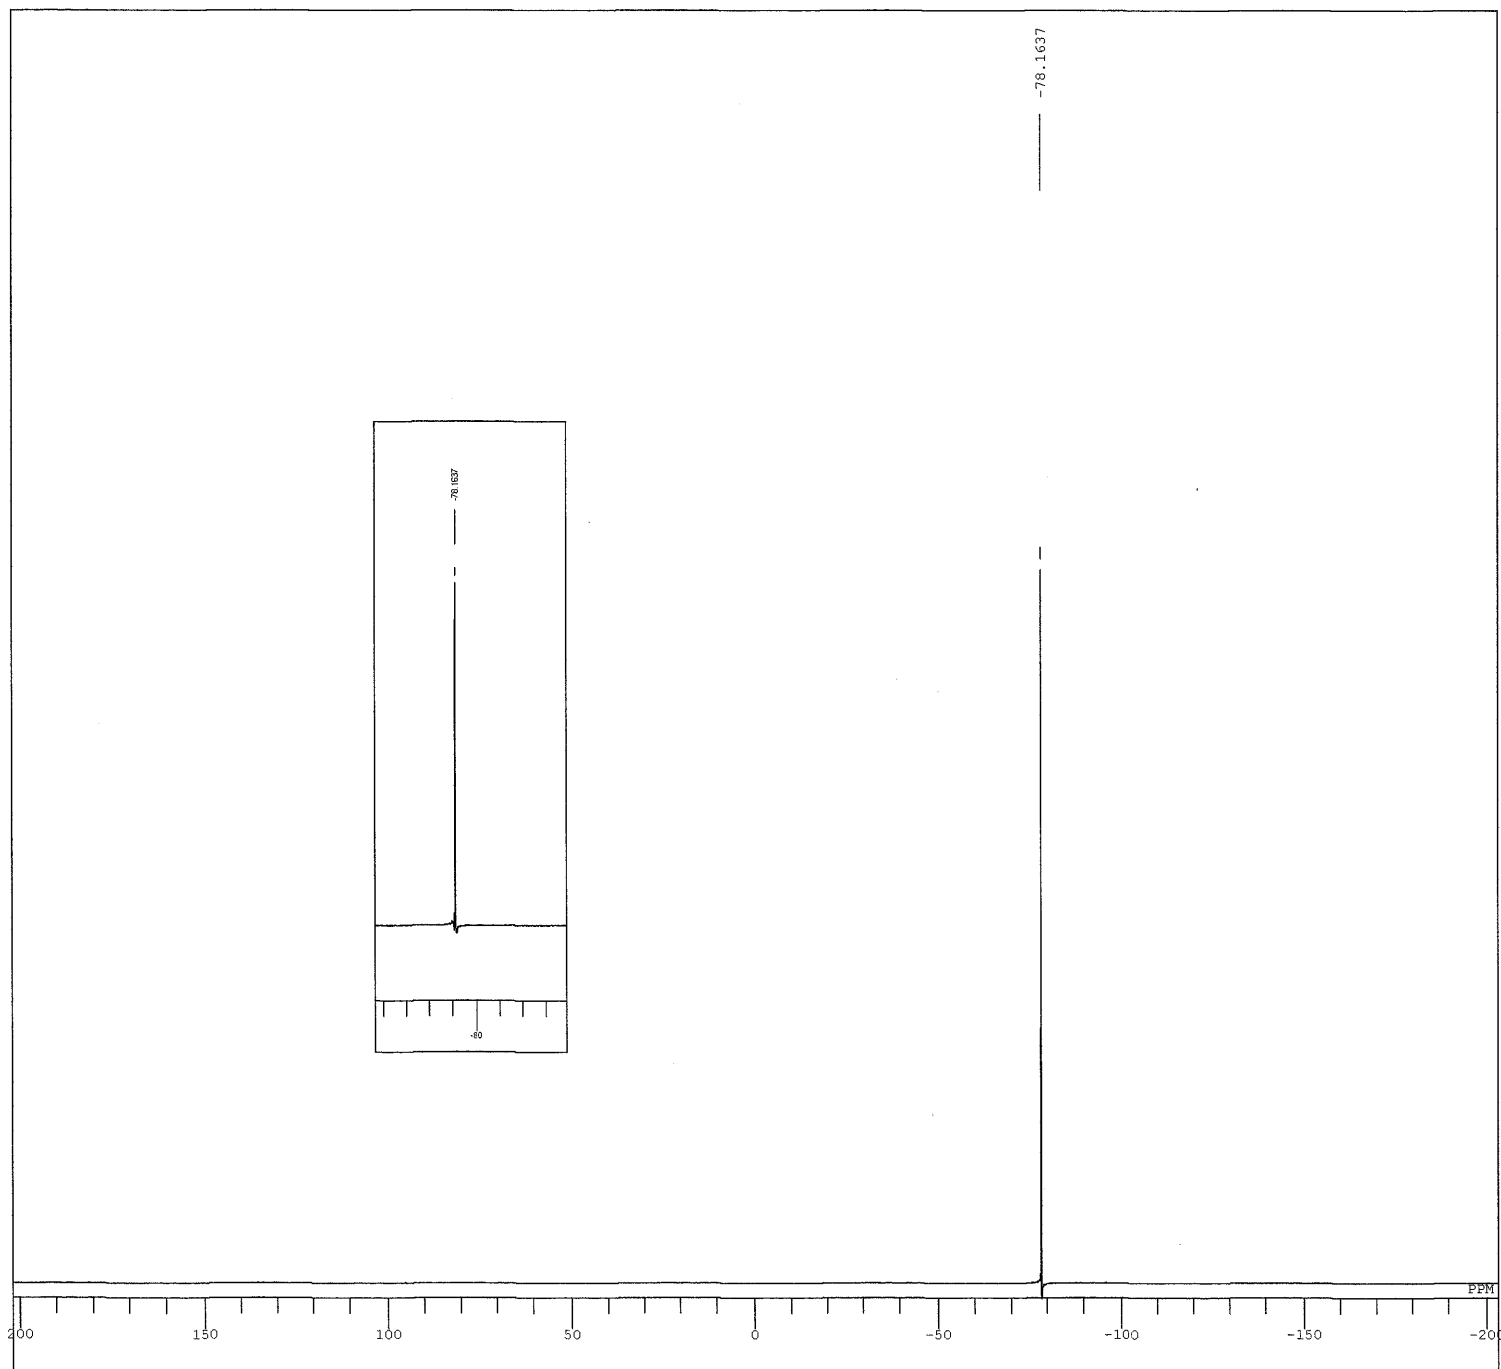

DFILE ozawa04-047\_19f.jdf  
COMNT citr-H2  
DATIM 16-11-2013 13:37:01  
OBNUC 19F  
EXMOD proton.jxp  
OBFRQ 368.64 MHz  
OBSET 7.63 KHz  
OBFIN 2.85 Hz  
POINT 16384  
FREQU 186567.17 Hz  
SCANS 8  
ACQTM 0.0878 sec  
PD 5.0000 sec  
FW1 3.90 usec  
IRNUC 19F  
CTEMP 23.0 c  
SLVNT CDCL3  
EXREF -164.90 ppm  
BF 0.12 Hz  
RGAIN 48

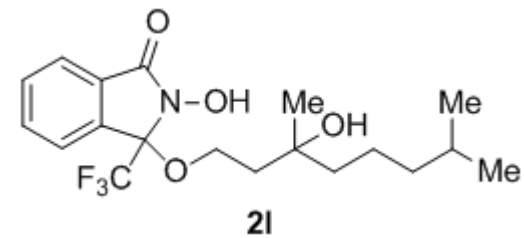

3-Me-1,5-pentdiol

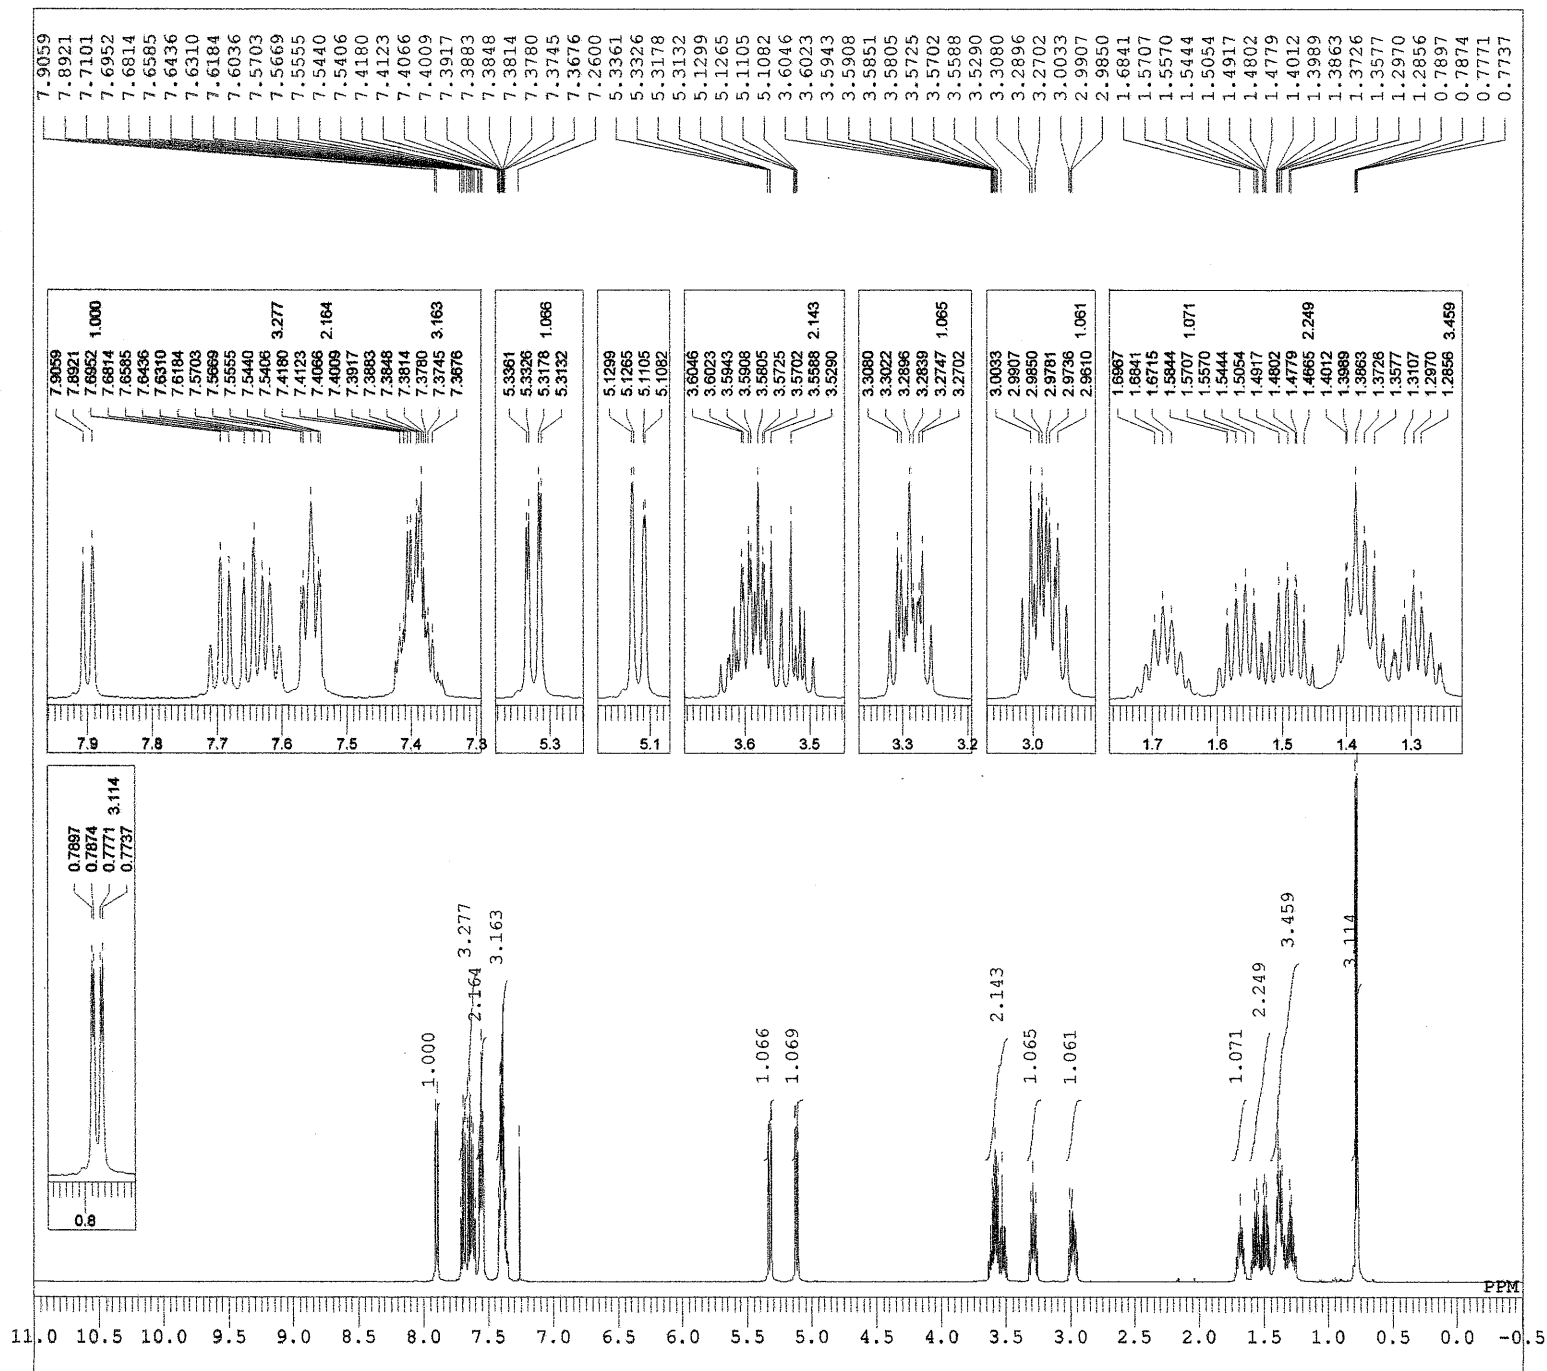

DFILE ozawa06-062\_1h.jdf  
 COMNT 3-Me-1,5-pentdiol  
 DATIM 2014-12-05 15:47:26  
 OBNUC 1H  
 EXMOD proton.jxp  
 OBFREQ 500.16 MHz  
 OBSSET 2.41 KHz  
 OBFIN 6.01 Hz  
 POINT 16384  
 FREQU 9384.38 Hz  
 SCANS 8  
 ACQTM 1.7459 sec  
 PD 5.0000 sec  
 PW1 5.55 usec  
 IRNUC 1H  
 CTEMP 25.3 c  
 SLVNT CDCl3  
 EXREF 7.26 ppm  
 BF 0.12 Hz  
 RGAIN 30

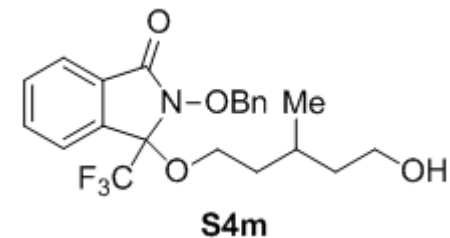

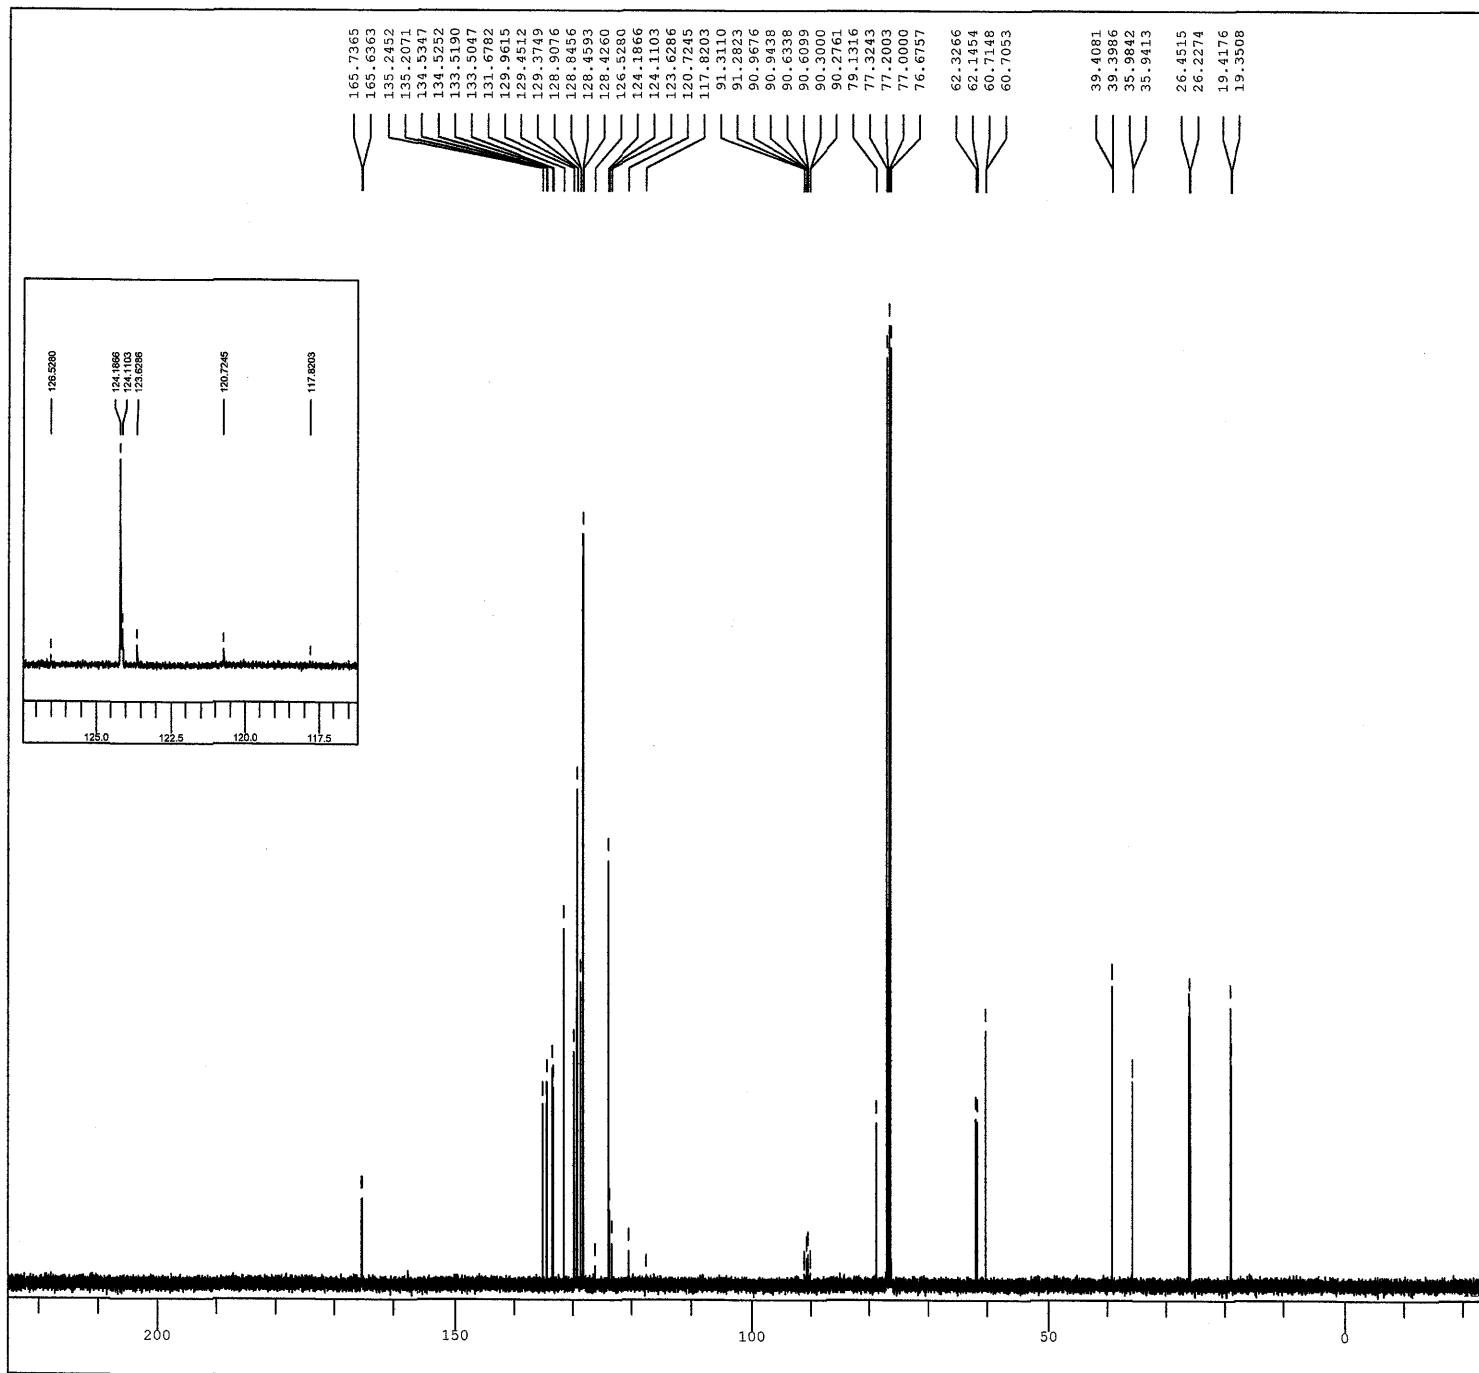

DFILE ozawa06-062\_13C.jdf  
 COMNT 3-Me-1,5-pentdiol, Bn  
 DATIM 06-12-2014 07:55:19  
 OBNUC 13C  
 EXMOD carbon.jxp  
 OBFREQ 98.52 MHz  
 OBSSET 4.64 KHz  
 OBFIN 8.74 Hz  
 POINT 65535  
 FREQU 30788.18 Hz  
 SCANS 644  
 ACQTM 2.1286 sec  
 PD 2.0000 sec  
 PW1 3.07 usec  
 IRNUC 1H  
 CTEMP 22.3 c  
 SLVNT CDCL3  
 EXREF 77.00 ppm  
 BF 0.12 Hz  
 RGAIN 60

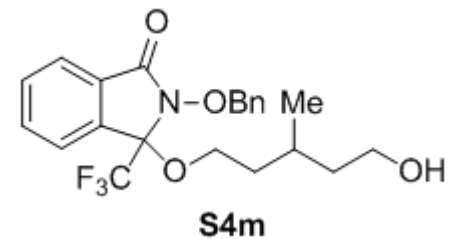

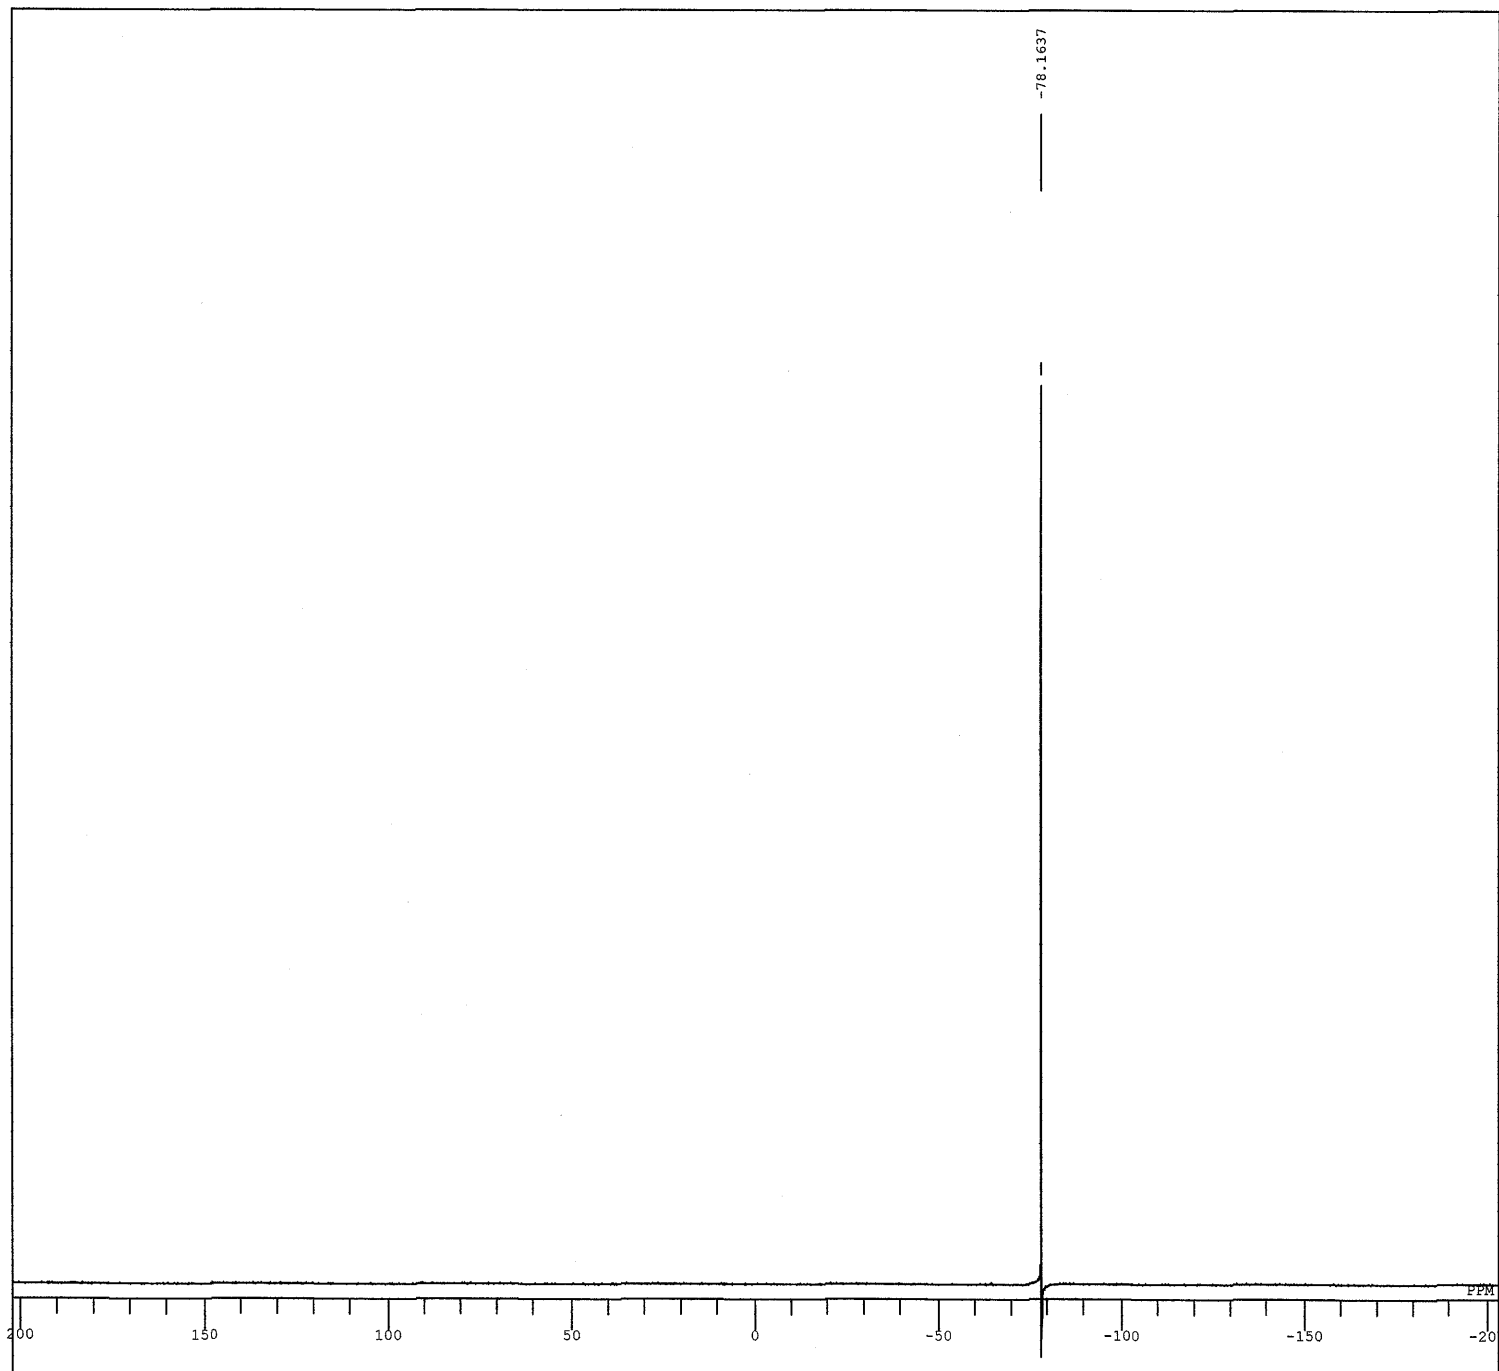

DFILE ozawa06-062\_19F.jdf  
COMNT 3-Me-1,5-pentdiol  
DATIM 06-12-2014 07:52:23  
OBNUC 19F  
EXMOD proton.jxp  
OBFREQ 368.64 MHz  
OBSETE 7.63 KHz  
OBFIN 2.85 Hz  
POINT 16384  
FREQU 186567.17 Hz  
SCANS 4  
ACQTM 0.0878 sec  
PD 5.0000 sec  
PW1 3.90 usec  
IRNUC 19F  
CTEMP 22.0 c  
SLVNT CDCL3  
EXREF -164.90 ppm  
BF 0.12 Hz  
RGAIN 48

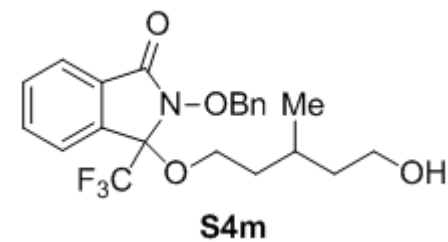



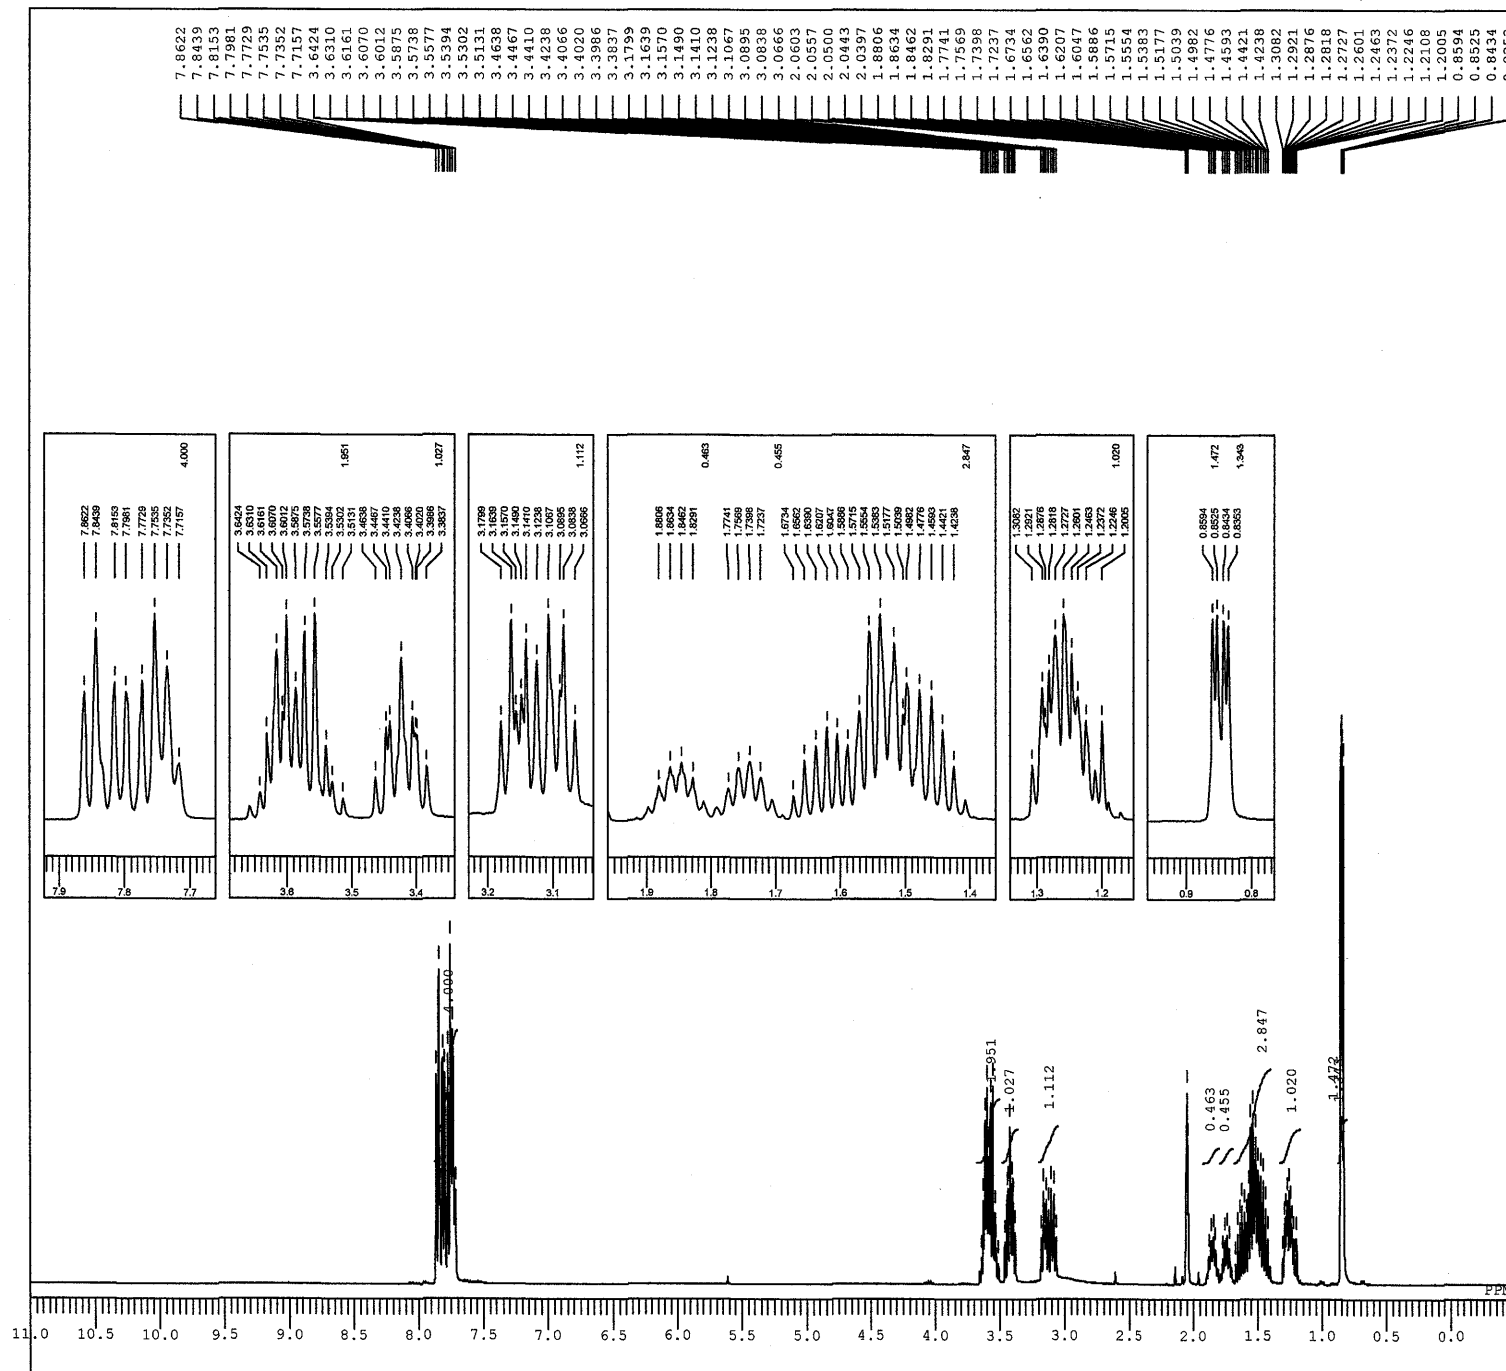

DFILE ozawa06-064 1H.jdf  
 COMNT 3-Me-1,5-pentdiol, OH  
 DATIM 06-12-2014 09:20:16  
 OBNUC 1H  
 EXMOD proton.jxp  
 OBFRQ 391.78 MHz  
 OBSST 8.51 KHz  
 OBFIN 3.34 Hz  
 POINT 16384  
 FREQU 7348.62 Hz  
 SCANS 4  
 ACQTM 2.2295 sec  
 PD 5.0000 sec  
 PW1 5.07 usec  
 IRNUC 1H  
 CTEMP 21.9 c  
 SLVNT ACETN  
 EXREF 2.05 ppm  
 BF 0.12 Hz  
 RGAIN 30

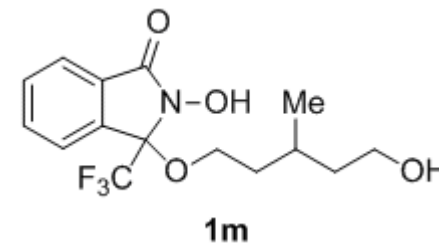

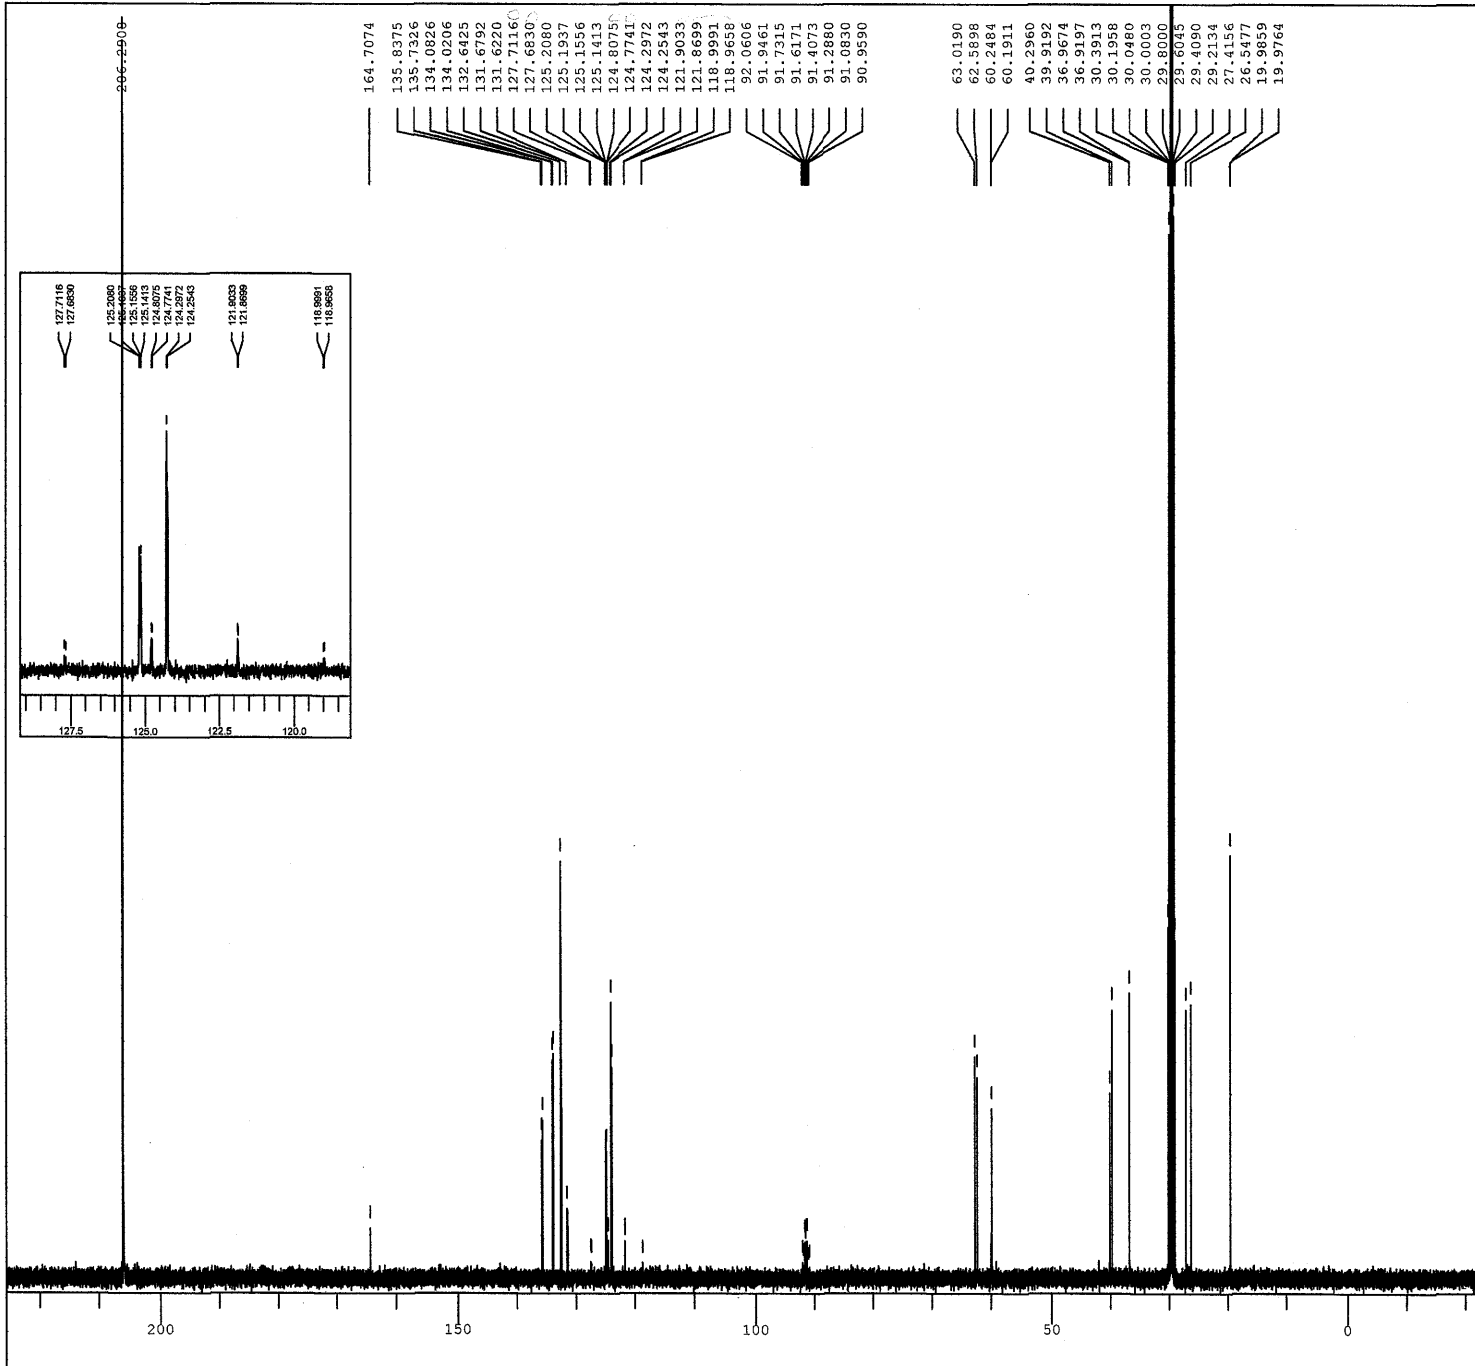

DFILE ozawa06-064\_13C.jdf  
 COMNT 3-Me-1,5-pentdiol, OH  
 DATIM 06-12-2014 09:21:31  
 OBNUC 13C  
 EXMOD carbon.jxp  
 OBFRO 98.52 MHz  
 OBSFT 4.64 KHz  
 OBFIN 8.74 Hz  
 POINT 65535  
 FREQU 30788.18 Hz  
 SCANS 536  
 ACQTM 2.1286 sec  
 PD 2.0000 sec  
 PW1 3.07 usec  
 IRNUC 1H  
 CTEMP 22.7 c  
 SLVNT ACETN  
 EXREF 29.80 ppm  
 BF 0.12 Hz  
 RGAIN 60

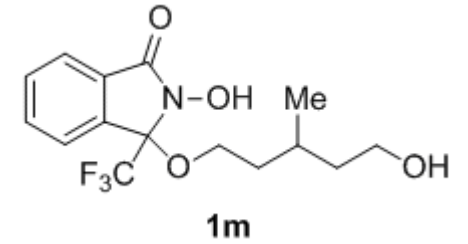

3-Me-1,5-pentdiol, OH

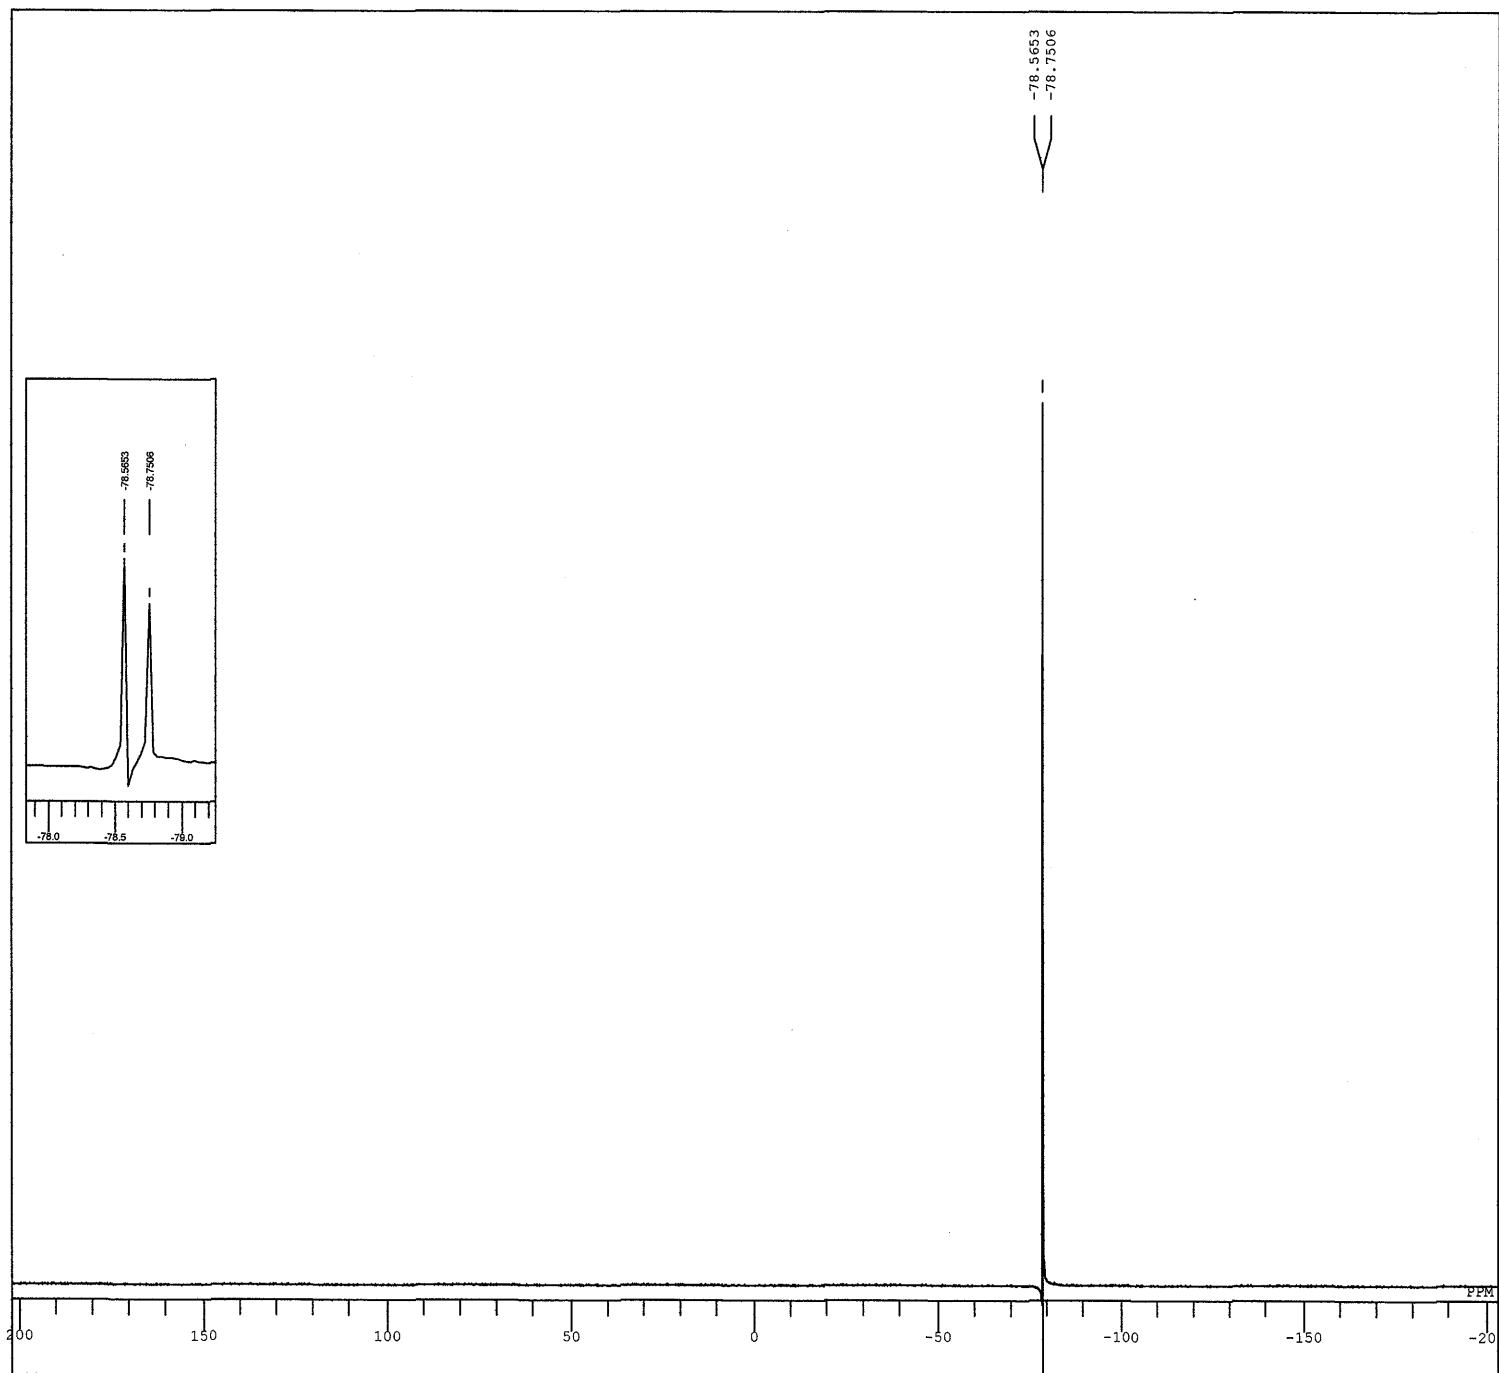

DFILE ozawa06-064\_19F.jdf  
COMNT 3-Me-1,5-pentdiol, OH  
DATIM 06-12-2014 09:18:12  
OBNUC 19F  
EXMOD proton.jxp  
OBFRQ 368.64 MHz  
OBSET 7.63 KHz  
OBFIN 2.85 Hz  
POINT 16384  
FREQU 186567.17 Hz  
SCANS 4  
ACQTM 0.0878 sec  
PD 5.0000 sec  
PW1 3.90 usec  
IRNUC 19F  
CTEMP 21.9 c  
SLVNT ACETN  
EXREF -164.90 ppm  
BF 0.12 Hz  
RGAIN 46

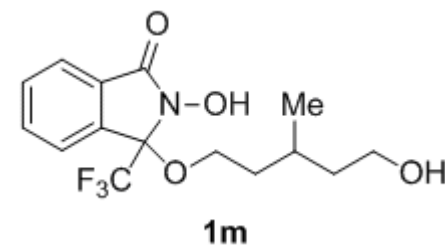



3-Me-1,5-pentdiol, [0]

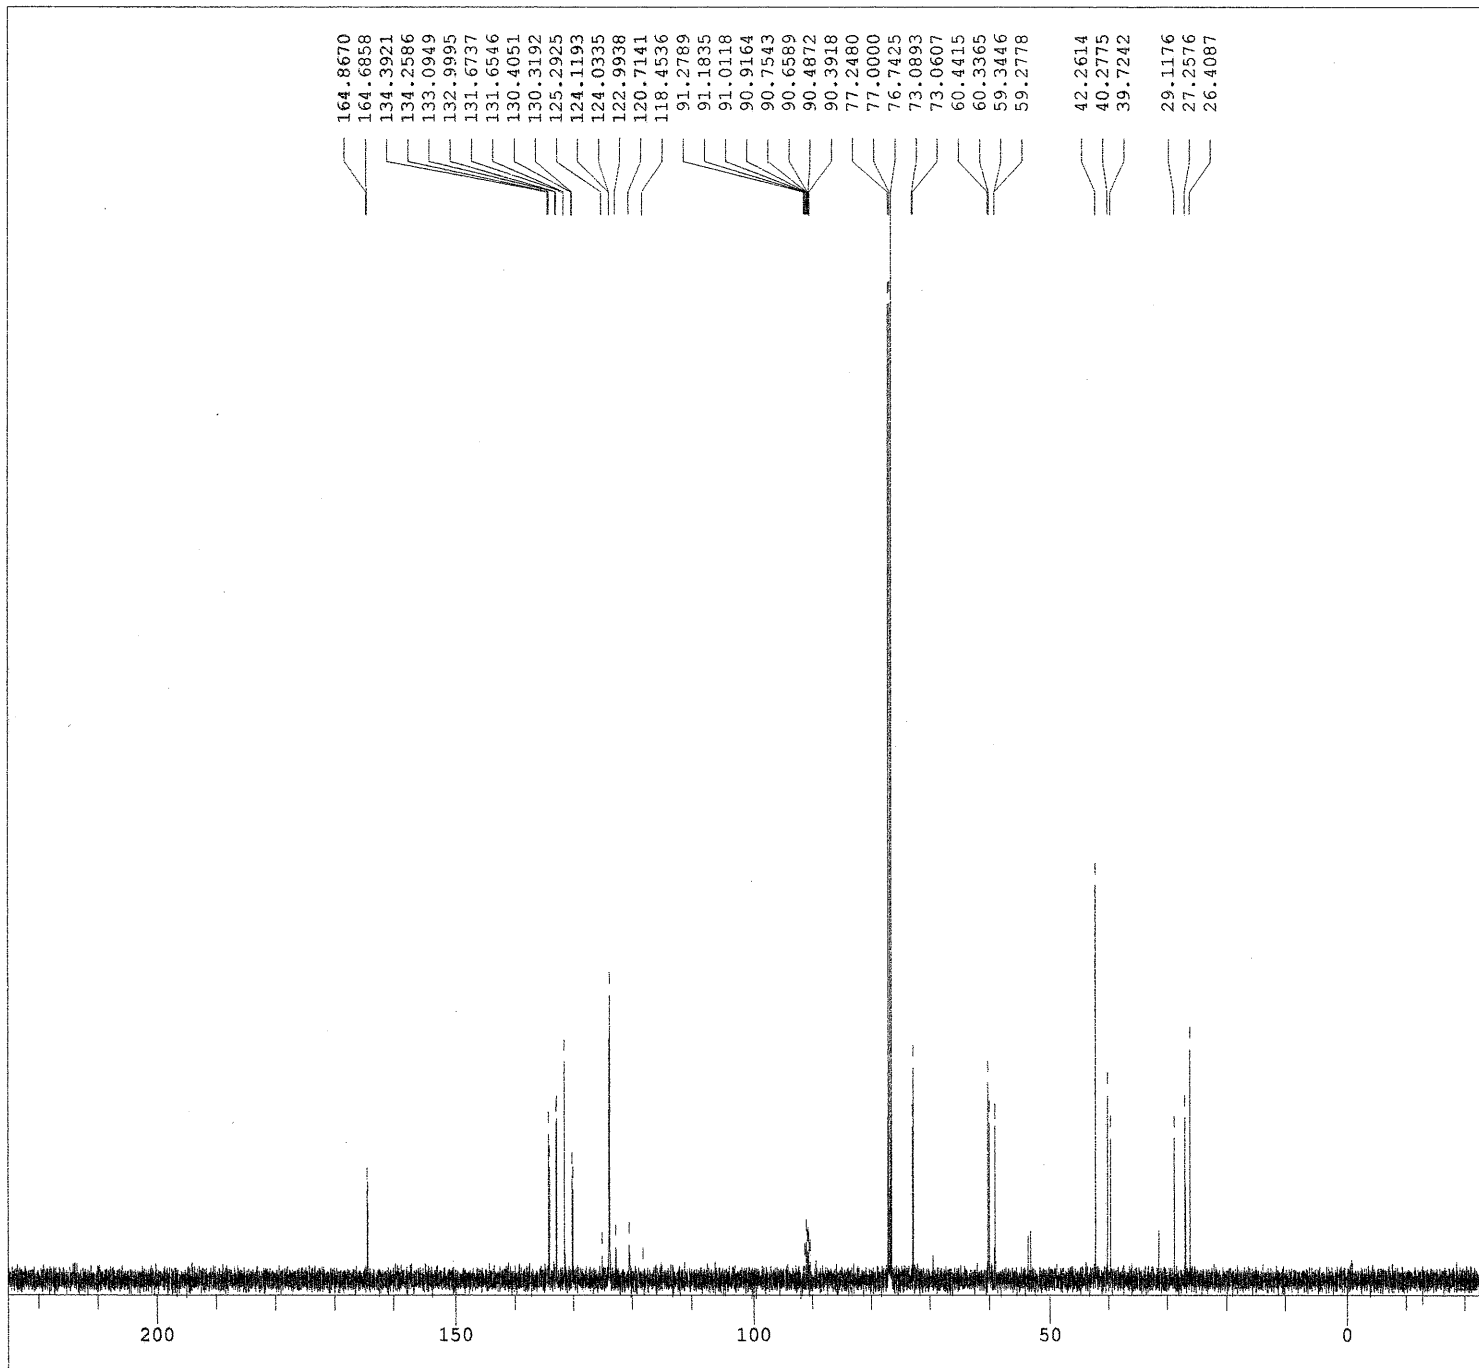

DFILE ozawa06-086\_13C.jdf  
COMNT 3-Me-1,5-pentdiol, [0]  
DATIM 2014-12-05 12:47:59  
OBNUC 13C  
EXMOD carbon.jxp  
OBFRQ 125.77 MHz  
OBSET 7.87 KHz  
OBFIN 4.21 Hz  
POINT 32767  
FREQU 39308.18 Hz  
SCANS 300  
ACQTM 0.8336 sec  
PD 2.0000 sec  
PW1 3.40 usec  
IRNUC 1H  
CTEMP 25.7 c  
SLVNT CDCL3  
EXREF 77.00 ppm  
BF 0.12 Hz  
RGAIN 60

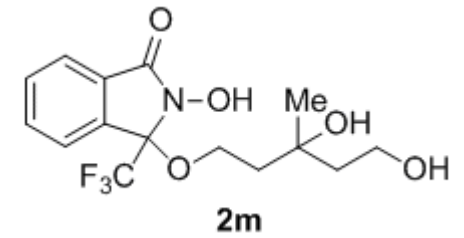

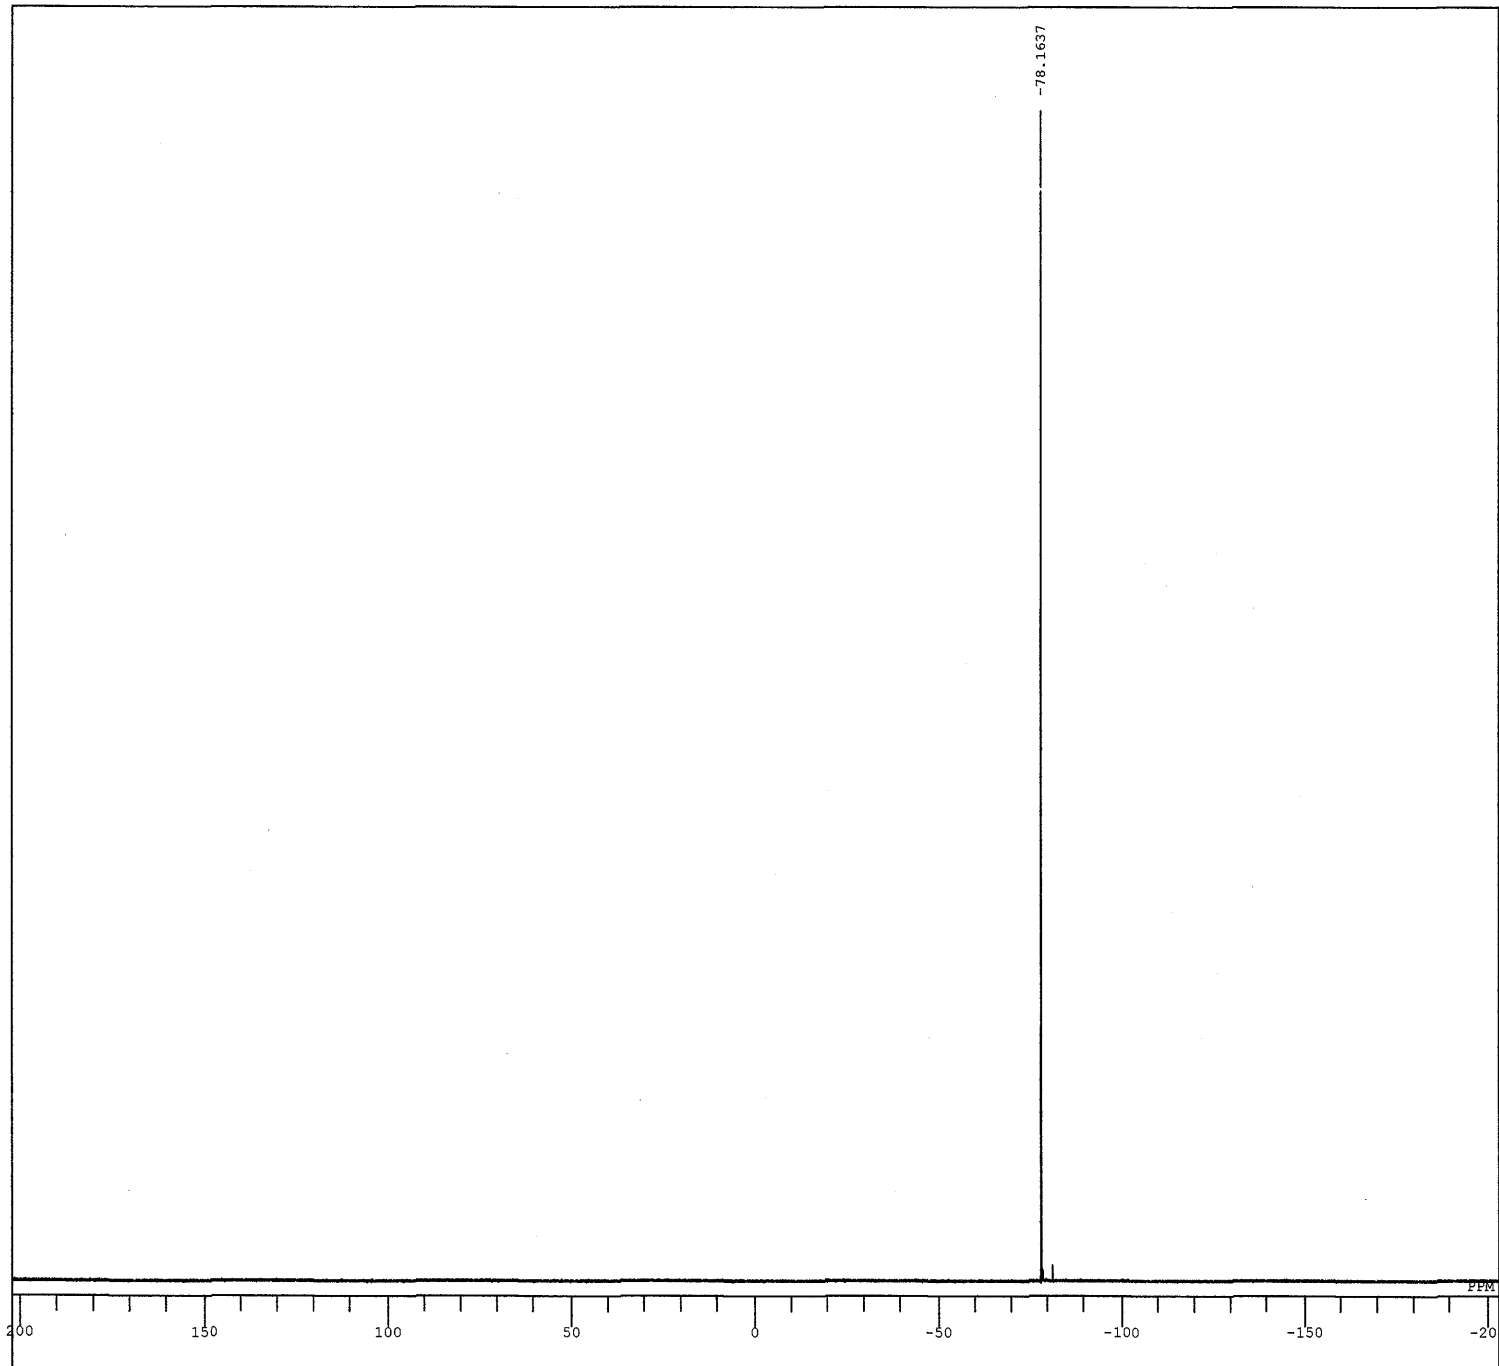

DFILE ozawa06-086\_19F.jdf  
COMNT 3-Me-1,5-pentdiol, [0]  
DATIM 05-12-2014 17:21:06  
OBNUC 19F  
EXMOD proton.jxp  
OBFREQ 368.64 MHz  
OBSEF 7.63 KHz  
OBFIN 2.85 Hz  
POINT 16384  
FREQU 186567.17 Hz  
SCANS 4  
ACQTM 0.0878 sec  
PD 5.0000 sec  
PWI 3.90 usec  
IRNUC 19F  
CTEMP 22.6 c  
SLVNT CDCL3  
EXREF -164.90 ppm  
BF 0.12 Hz  
RGAIN 50

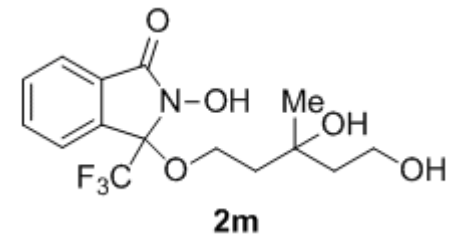

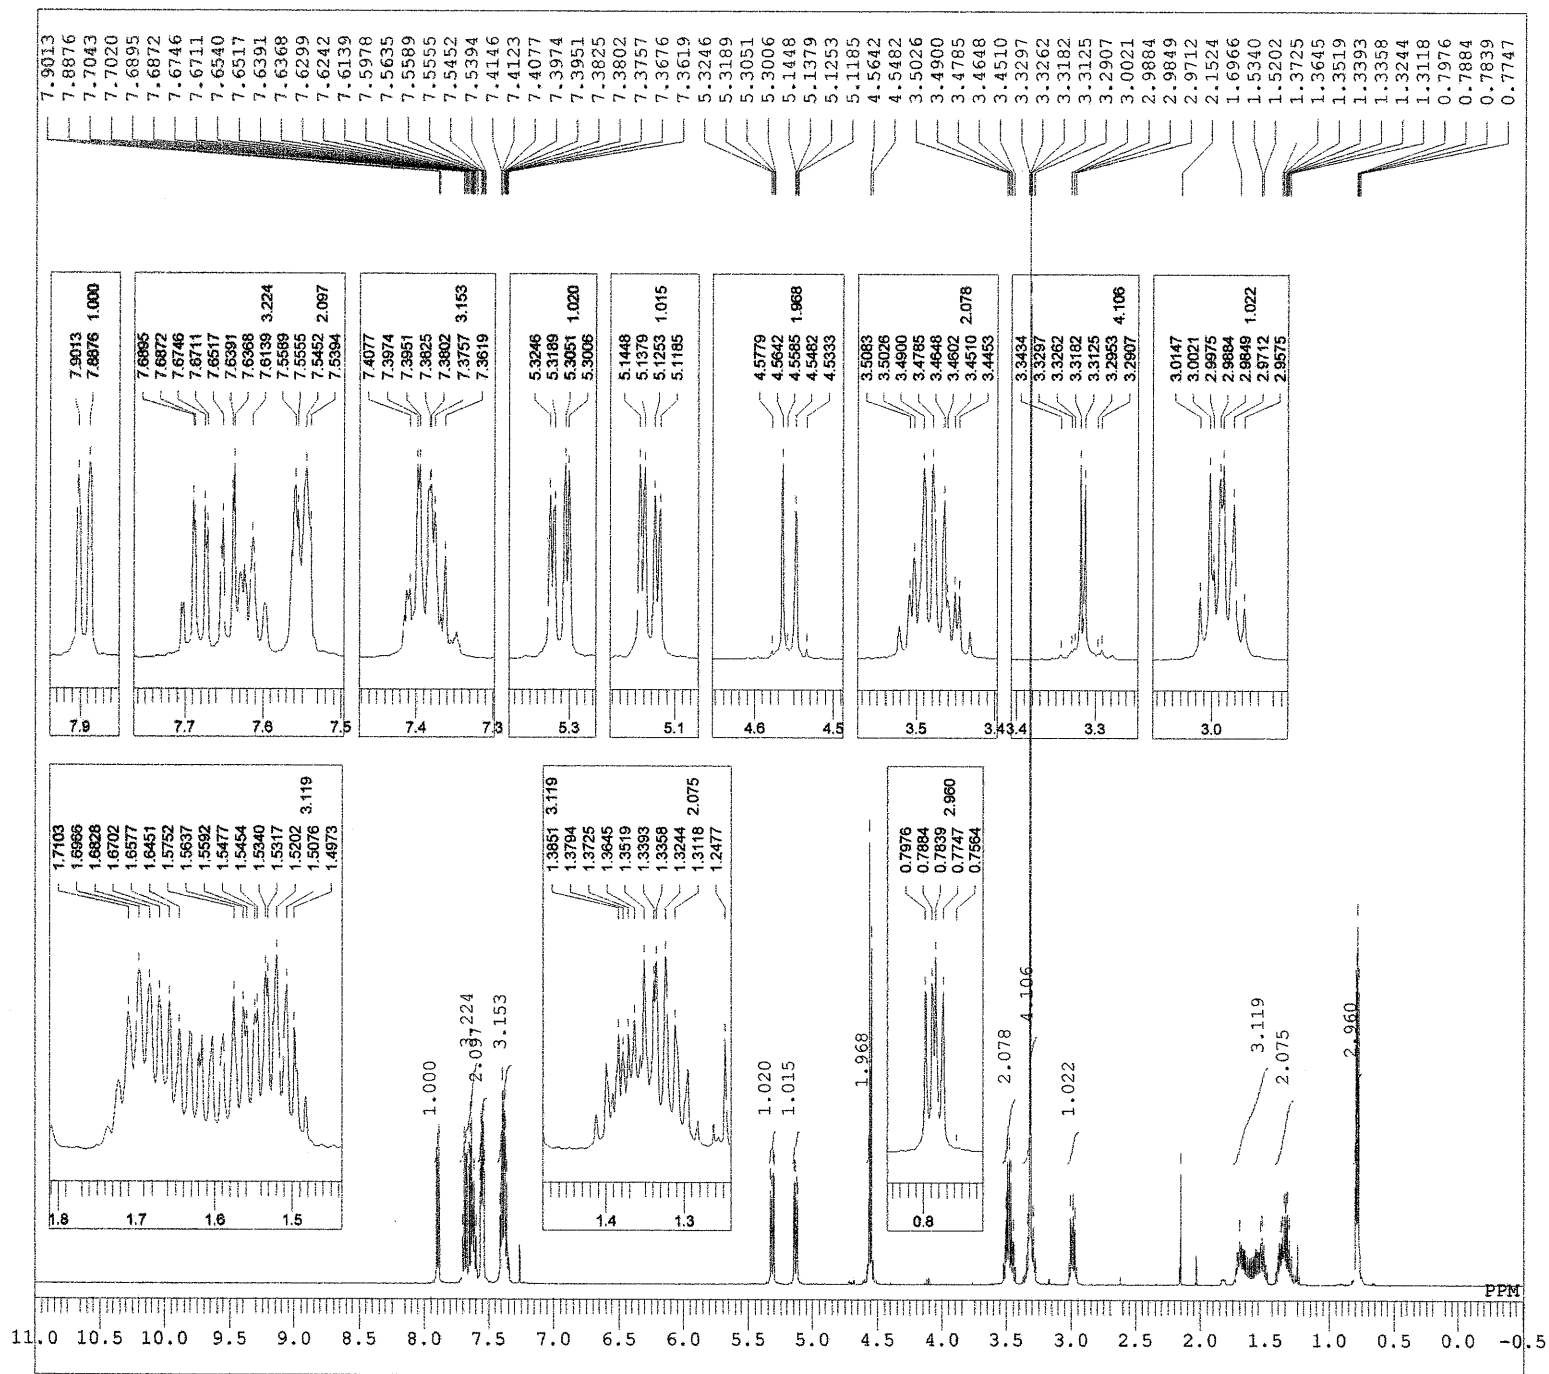

DFILE ozawa07-022\_1h.als  
 COMNT 3-Me-5-OMOM, Bn  
 DATIM 2015-03-02 10:00:34  
 OBNUC 1H  
 EXMOD proton.jxp  
 OBFREQ 500.16 MHz  
 OBSSET 2.41 KHz  
 OBFIN 6.01 Hz  
 POINT 13107  
 FREQU 7507.51 Hz  
 SCANS 8  
 ACQTM 1.7459 sec  
 PD 5.0000 sec  
 PWL 5.55 usec  
 IRNUC 1H  
 CTEMP 23.4 c  
 SLVNT CDCL3  
 EXREF 7.26 ppm  
 BF 0.12 Hz  
 RGAIN 24

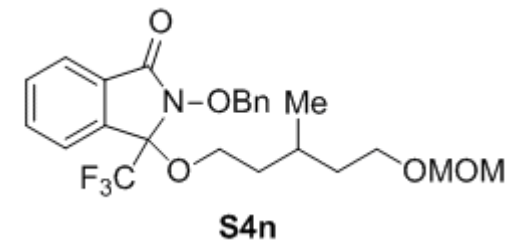

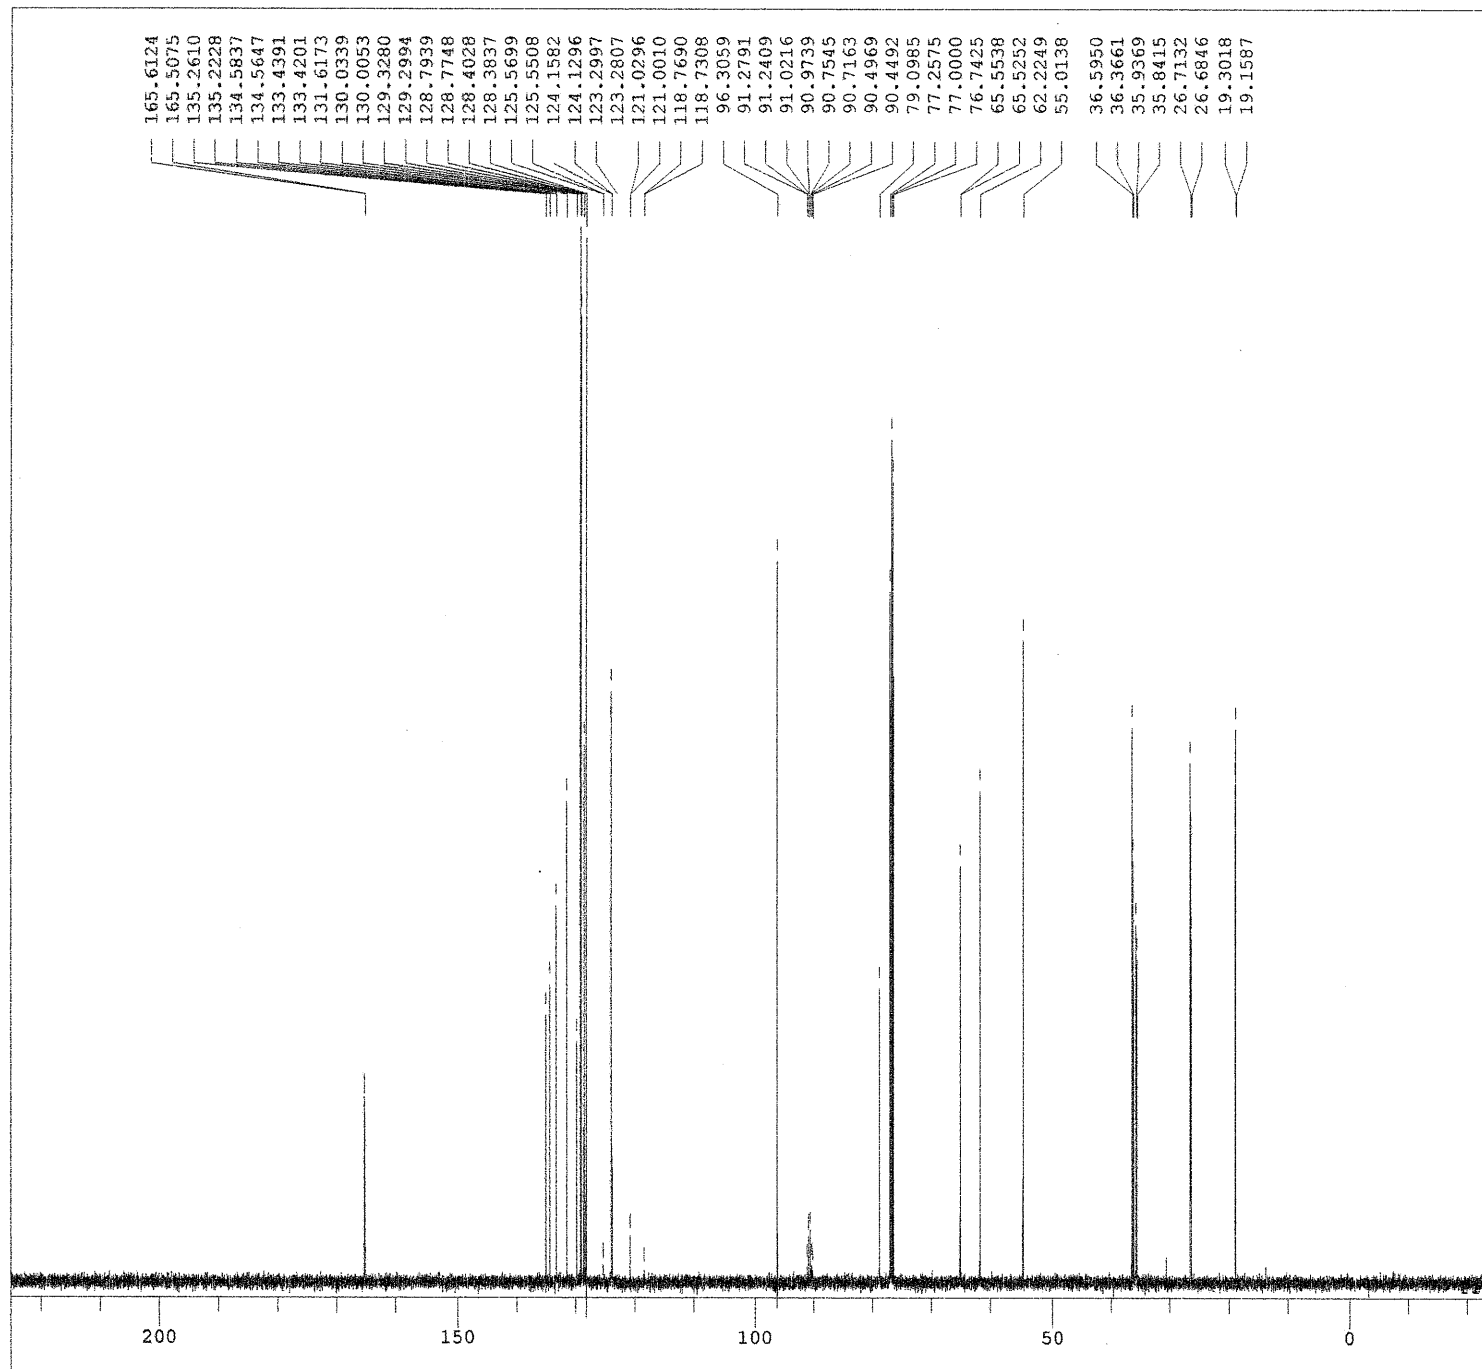

DFILE ozawa07-022\_13C.als  
 COMNT 3-Me-5-OMOM, Bn  
 DATIM 2015-03-02 10:02:04  
 OBNUC 13C  
 EXMOD carbon.jxp  
 OBFREQ 125.77 MHz  
 OBSSET 7.87 KHz  
 OBFIN 4.21 Hz  
 POINT 26214  
 FREQU 31446.54 Hz  
 SCANS 476  
 ACQTM 0.8336 sec  
 PD 2.0000 sec  
 PW1 3.40 usec  
 IRNUC 1H  
 CTEMP 24.0 c  
 SLVNT CDCL3  
 EXREF 77.00 ppm  
 BF 0.12 Hz  
 RGAIN 60

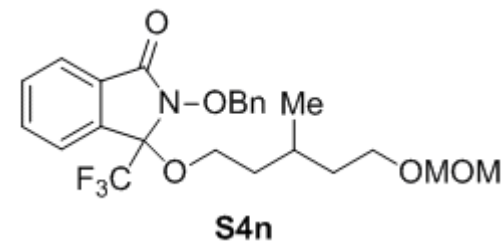



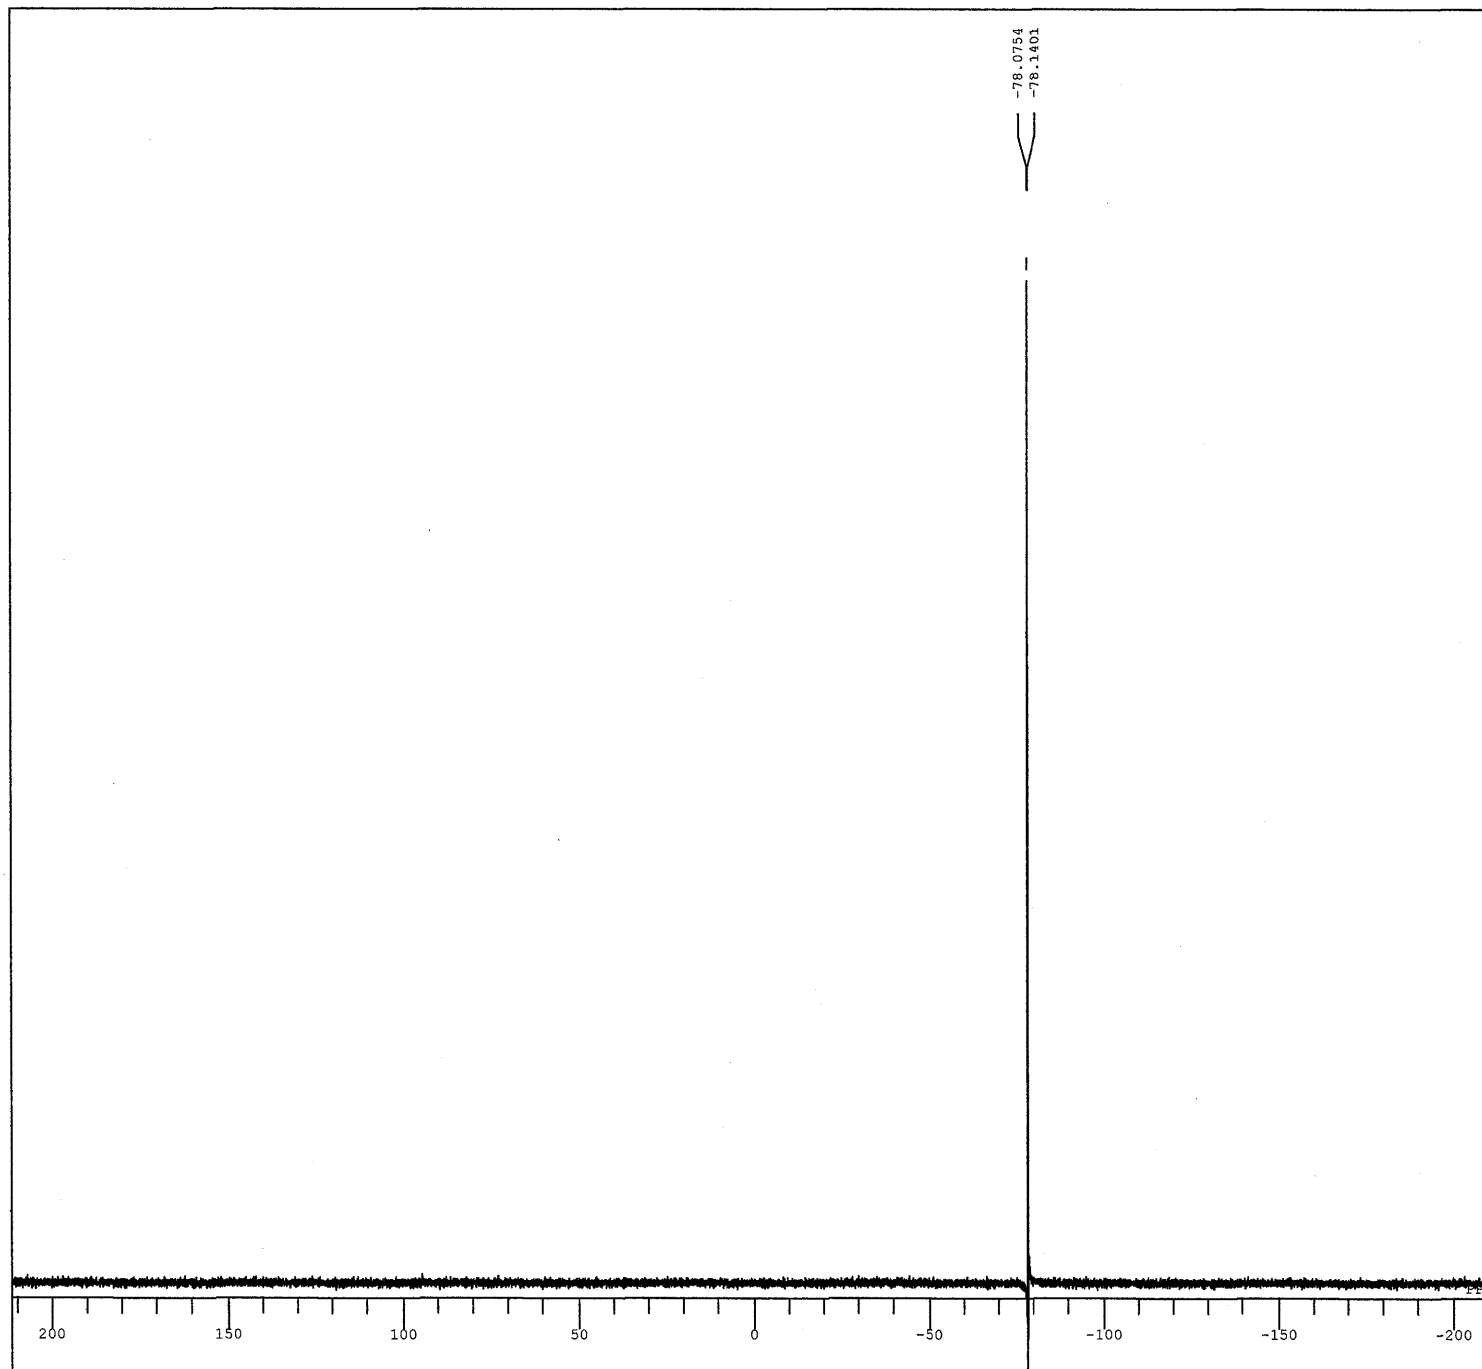

DFILE ozawa07-022\_19F.jdf  
COMNT 3-Me-5-OMOM, Bn  
DATIM 21-03-2015 12:11:35  
OBNUC 19F  
EXMOD proton.jxp  
OBFRO 368.64 MHz  
OBSET 7.63 KHz  
OBFIN 2.85 Hz  
POINT 16384  
FREQU 195312.50 Hz  
SCANS 4  
ACQTM 0.0839 sec  
PD 5.0000 sec  
PW1 3.90 usec  
IRNUC 19F  
CTEMP 25.1 c  
SLVNT CDCL3  
EXREF -164.90 ppm  
BF 0.12 Hz  
RGAIN 50

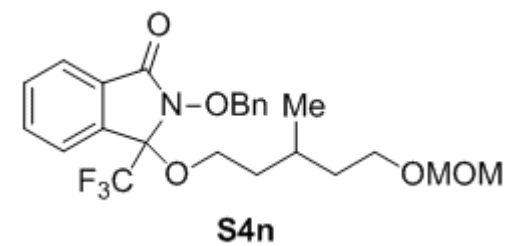

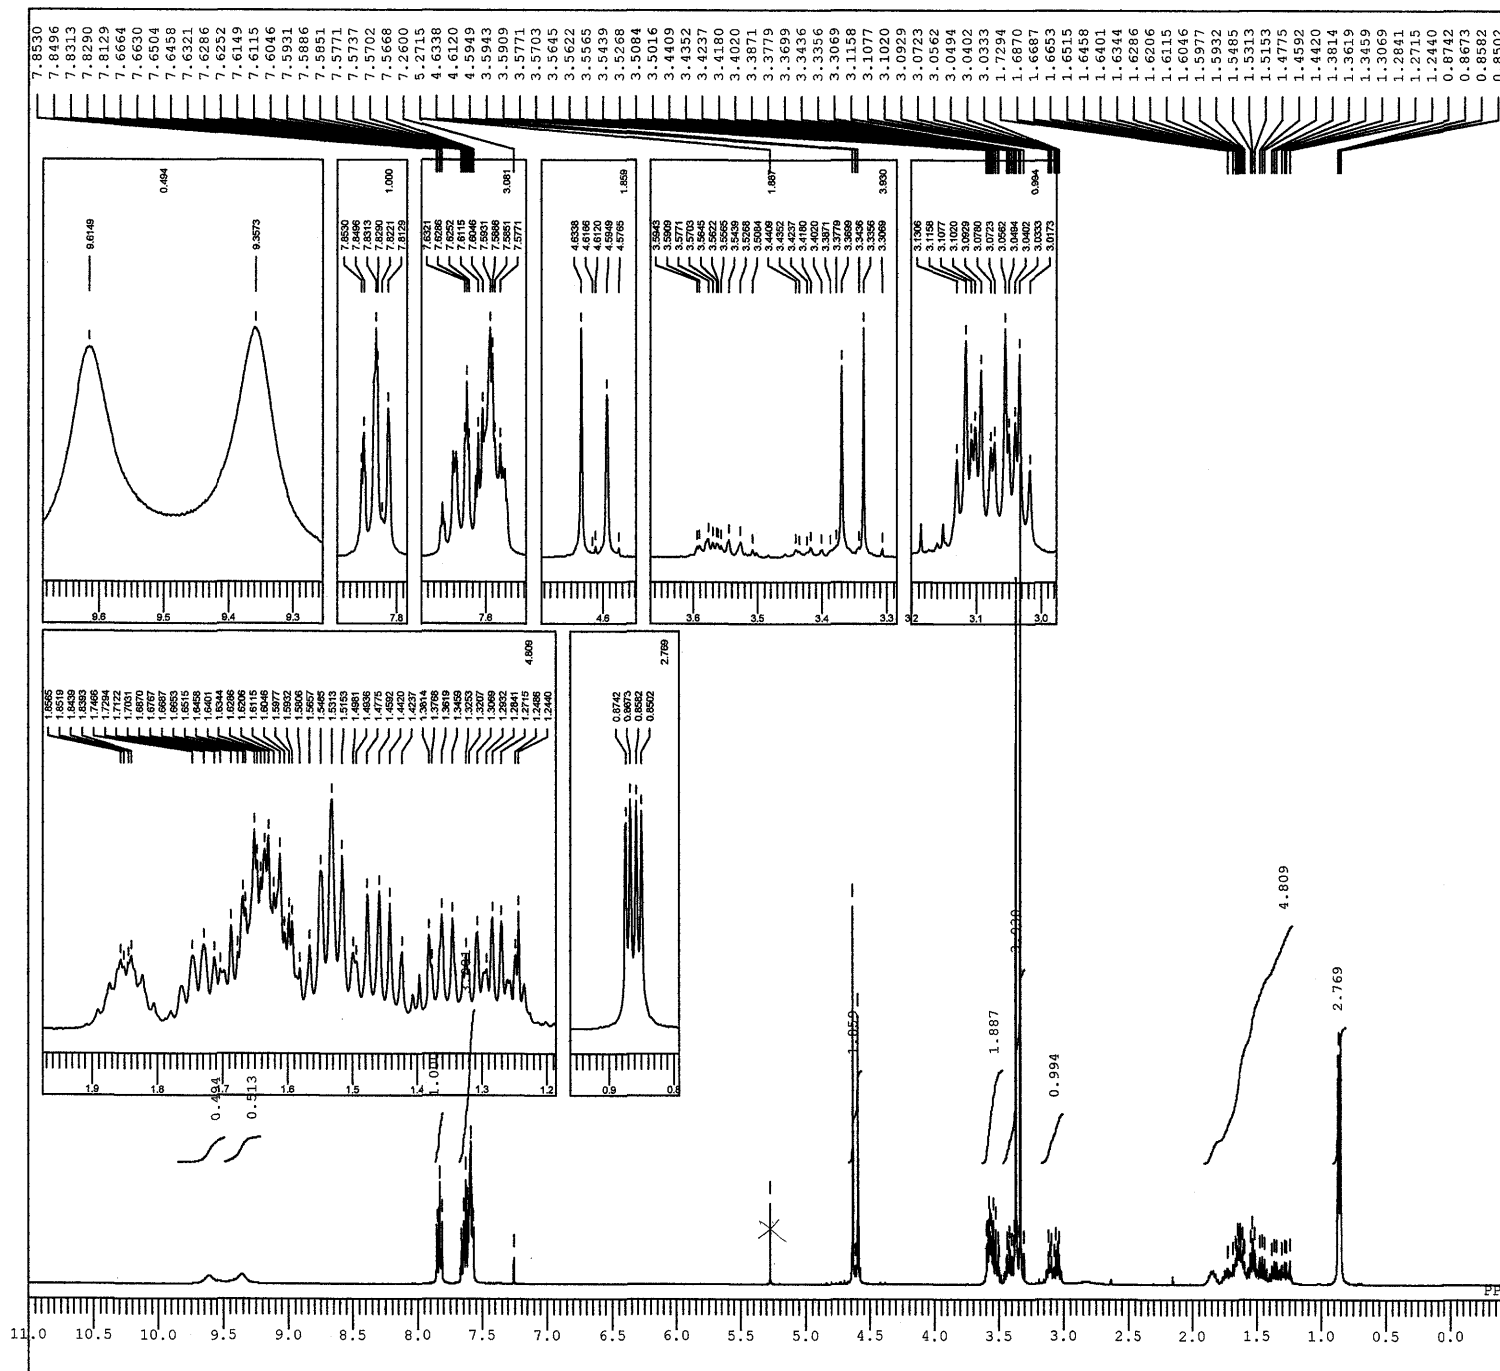

DFILE ozawa07-024 1H.jdf  
 COMNT 3-Me-5-OMOM, OH  
 DATIM 21-03-2015 12:26:11  
 OBNUC 1H  
 EXMOD proton.jxp  
 OBFRO 391.78 MHz  
 OBSET 8.51 KHz  
 OBFIN 3.34 Hz  
 POINT 16384  
 FREQU 7348.62 Hz  
 SCANS 4  
 ACQTM 2.2295 sec  
 PD 5.0000 sec  
 PW1 4.99 usec  
 IRNUC 1H  
 CTEMP 25.1 c  
 SLVNT CDCL3  
 EXREF 7.26 ppm  
 BF 0.12 Hz  
 RGAIN 22

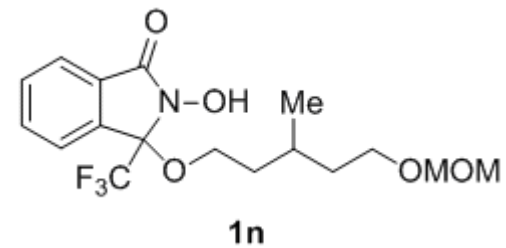

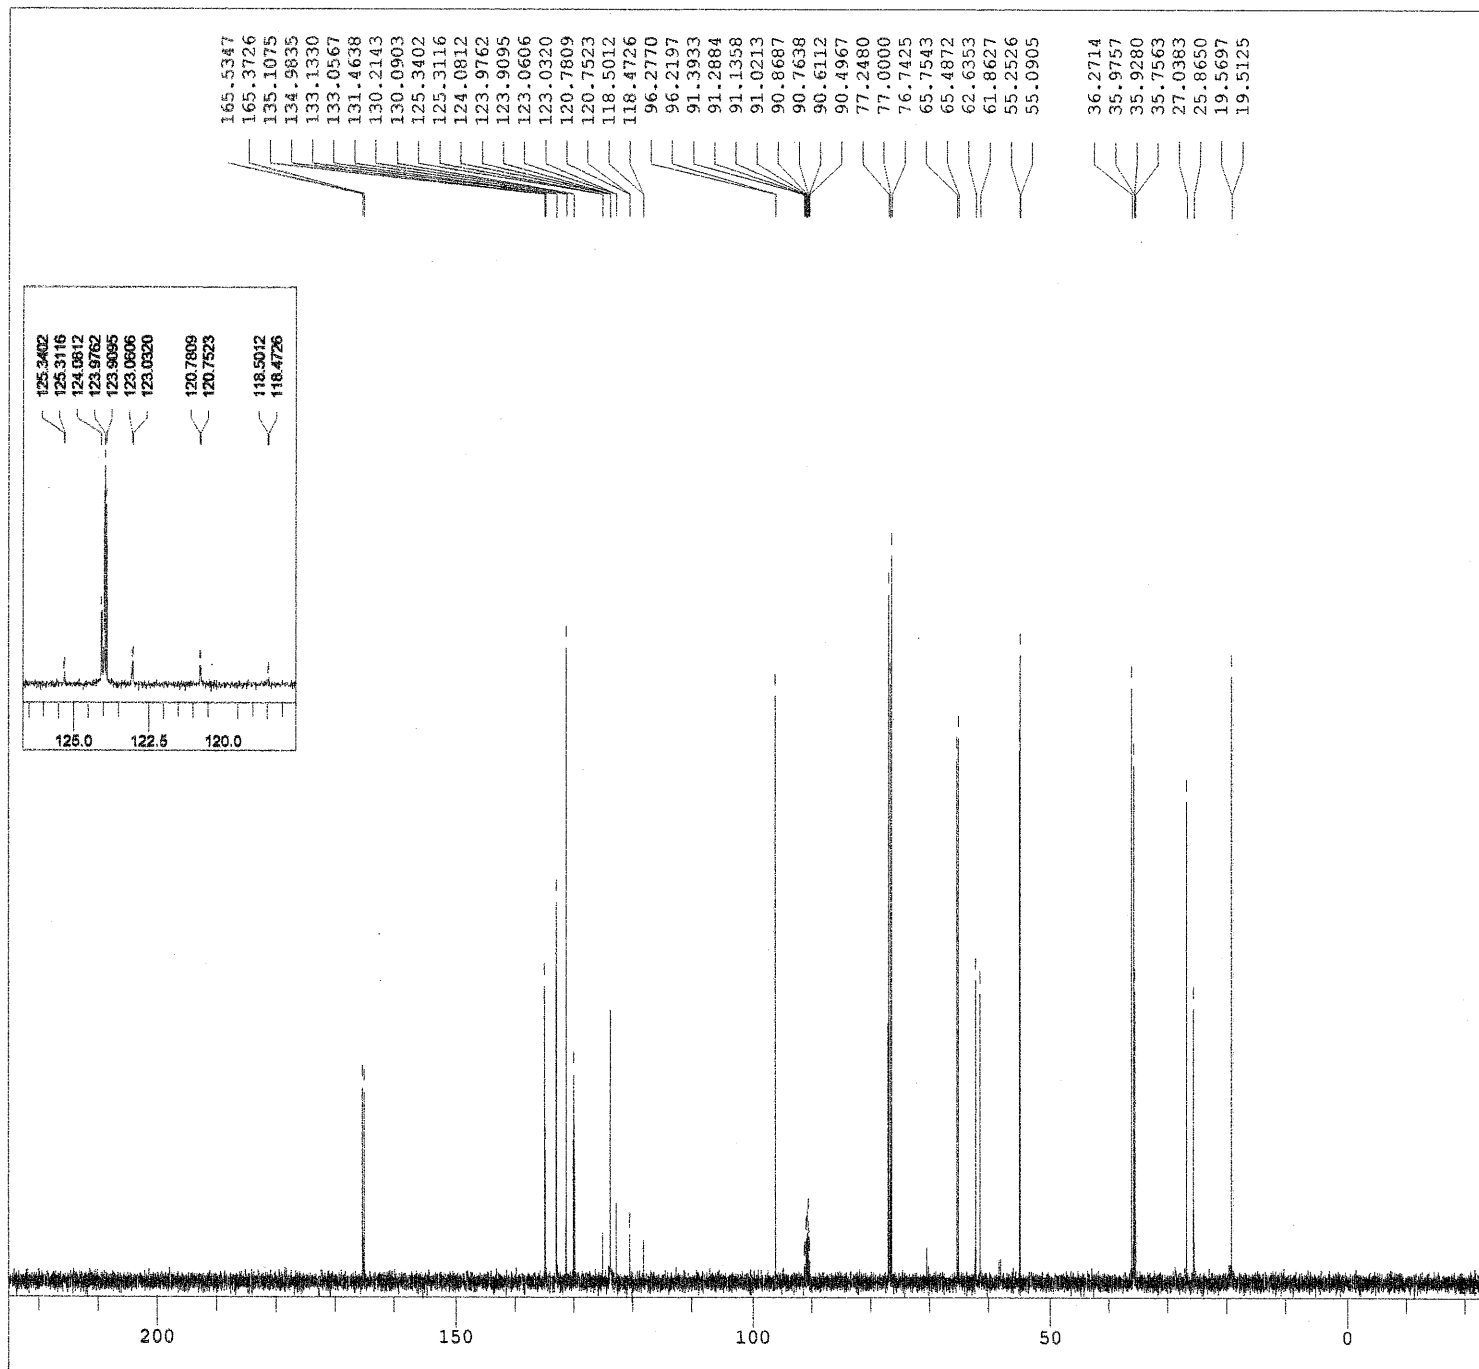

DFILE ozawa07-024\_13c.jdf  
 COMNT 3-Me-5-OMOM, OH  
 DATIM 2015-03-21 12:32:50  
 OBNUC 13C  
 EXMOD carbon.jxp  
 OBFREQ 125.77 MHz  
 OBSET 7.87 KHz  
 OBFIN 4.21 Hz  
 POINT 32767  
 FREQU 39308.18 Hz  
 SCANS 220  
 ACQTM 0.8336 sec  
 PD 2.0000 sec  
 PW1 3.40 usec  
 IRNUC 1H  
 CTEMP 26.5 c  
 SLVNT CDCl3  
 EXREF 77.00 ppm  
 BF 0.12 Hz  
 RGAIN 60

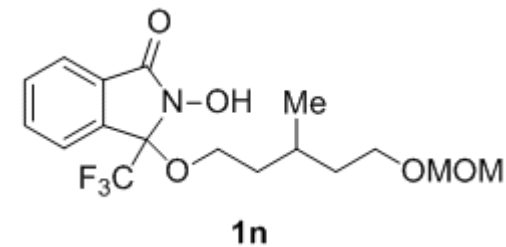

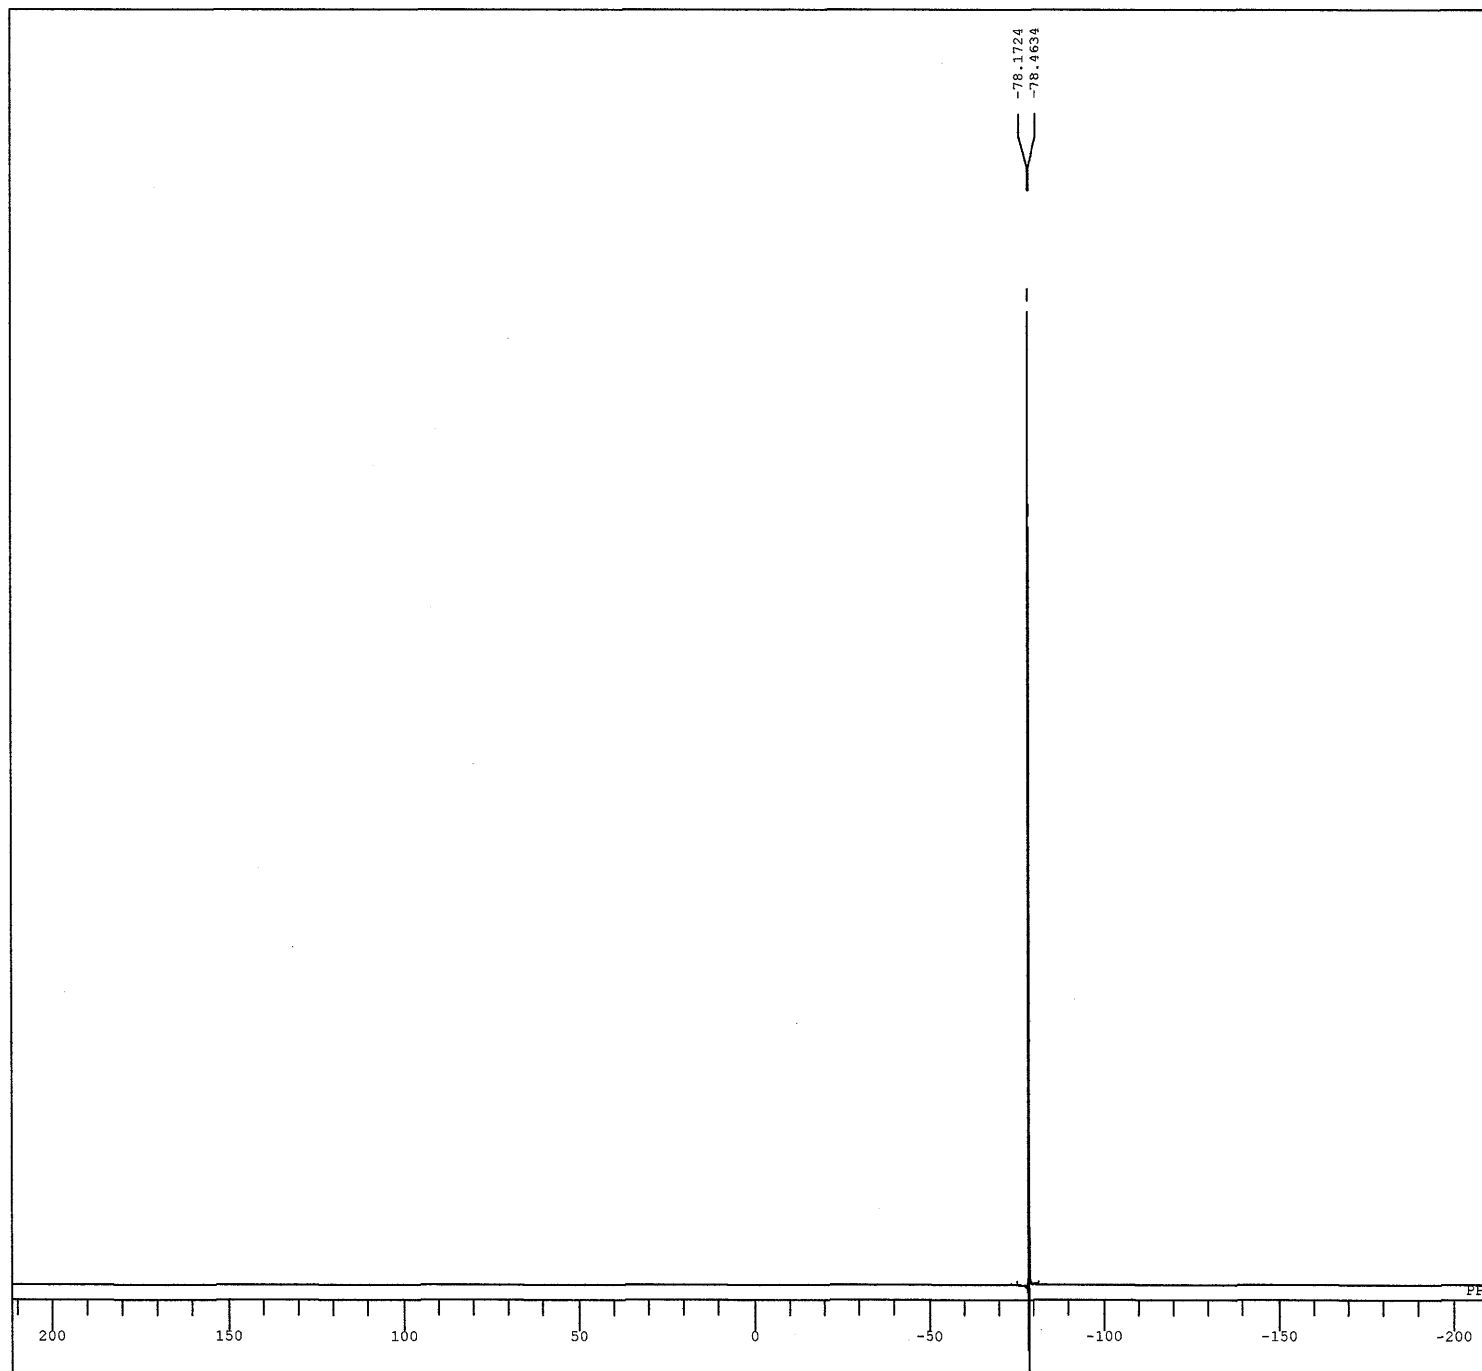

DFILE ozawa07-024 19F.jdf  
COMNT 3-Me-5-OMOM. OH  
DATIM 21-03-2015 12:22:07  
OBNUC 19F  
EXMOD proton.jxp  
OBFRQ 368.64 MHz  
OBSEF 7.63 KHz  
OBFIN 2.85 Hz  
POINT 16384  
FREQU 195312.50 Hz  
SCANS 4  
ACQTM 0.0839 sec  
PD 5.0000 sec  
PW1 3.90 usec  
IRNUC 19F  
CTEMP 25.1 c  
SLVNT CDCL3  
EXREF -164.90 ppm  
BF 0.12 Hz  
RGAIN 44

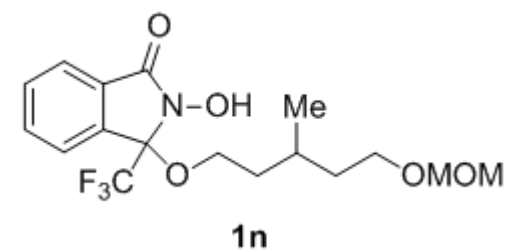



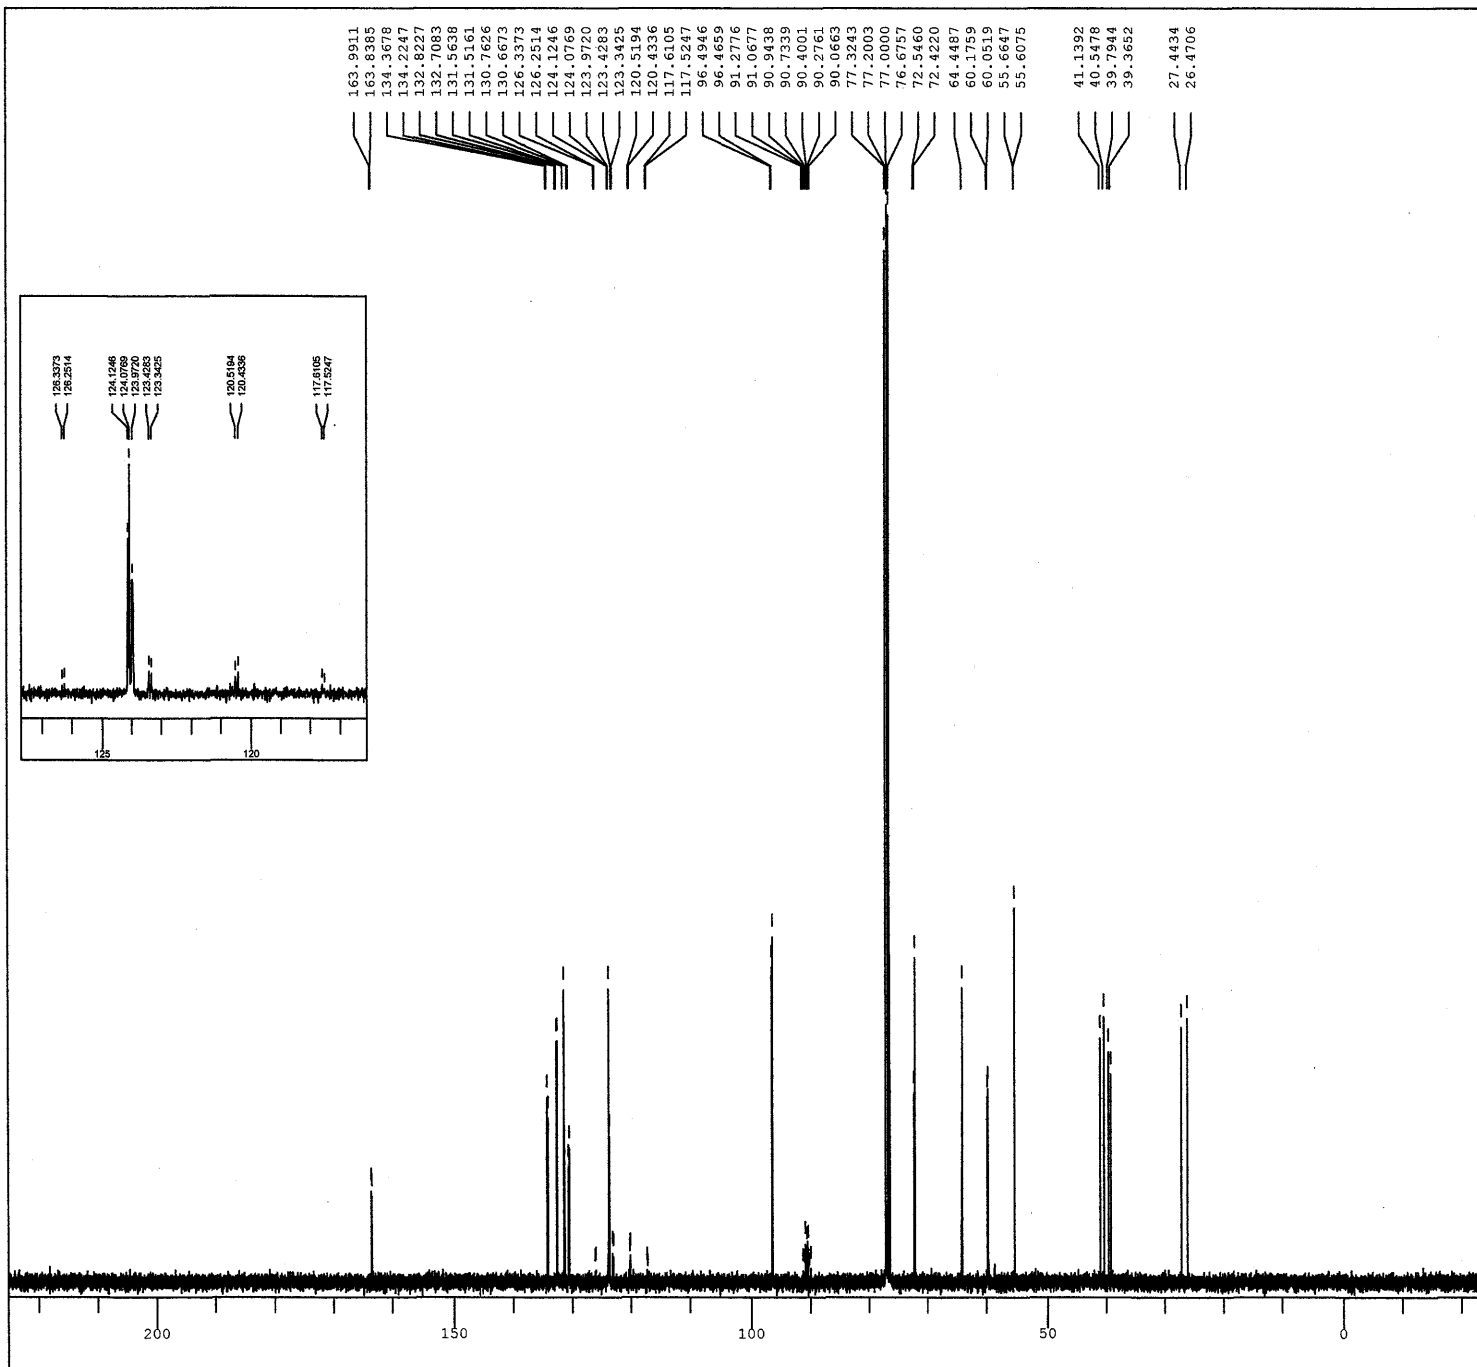

DFILE ozawa07-042\_13C.jdf  
 COMNT 3-Me-5-OMOM, [0]  
 DATIM 21-03-2015 10:36:53  
 OBNUC 13C  
 EXMOD carbon.jxp  
 OBFREQ 98.52 MHz  
 OBSSET 4.64 KHz  
 OBFIN 8.74 Hz  
 POINT 32767  
 FREQ 30788.18 Hz  
 SCANS 1100  
 ACQTM 1.0643 sec  
 PD 2.0000 sec  
 PW1 3.16 usec  
 IRNUC 1H  
 CTEMP 25.4 c  
 SLVNT CDCL3  
 EXREF 77.00 ppm  
 BF 0.12 Hz  
 RGAIN 60

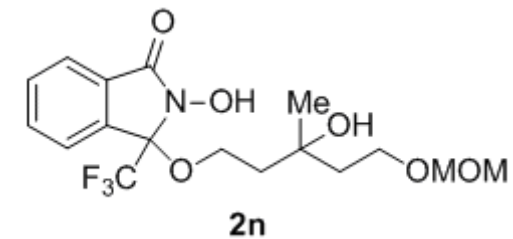

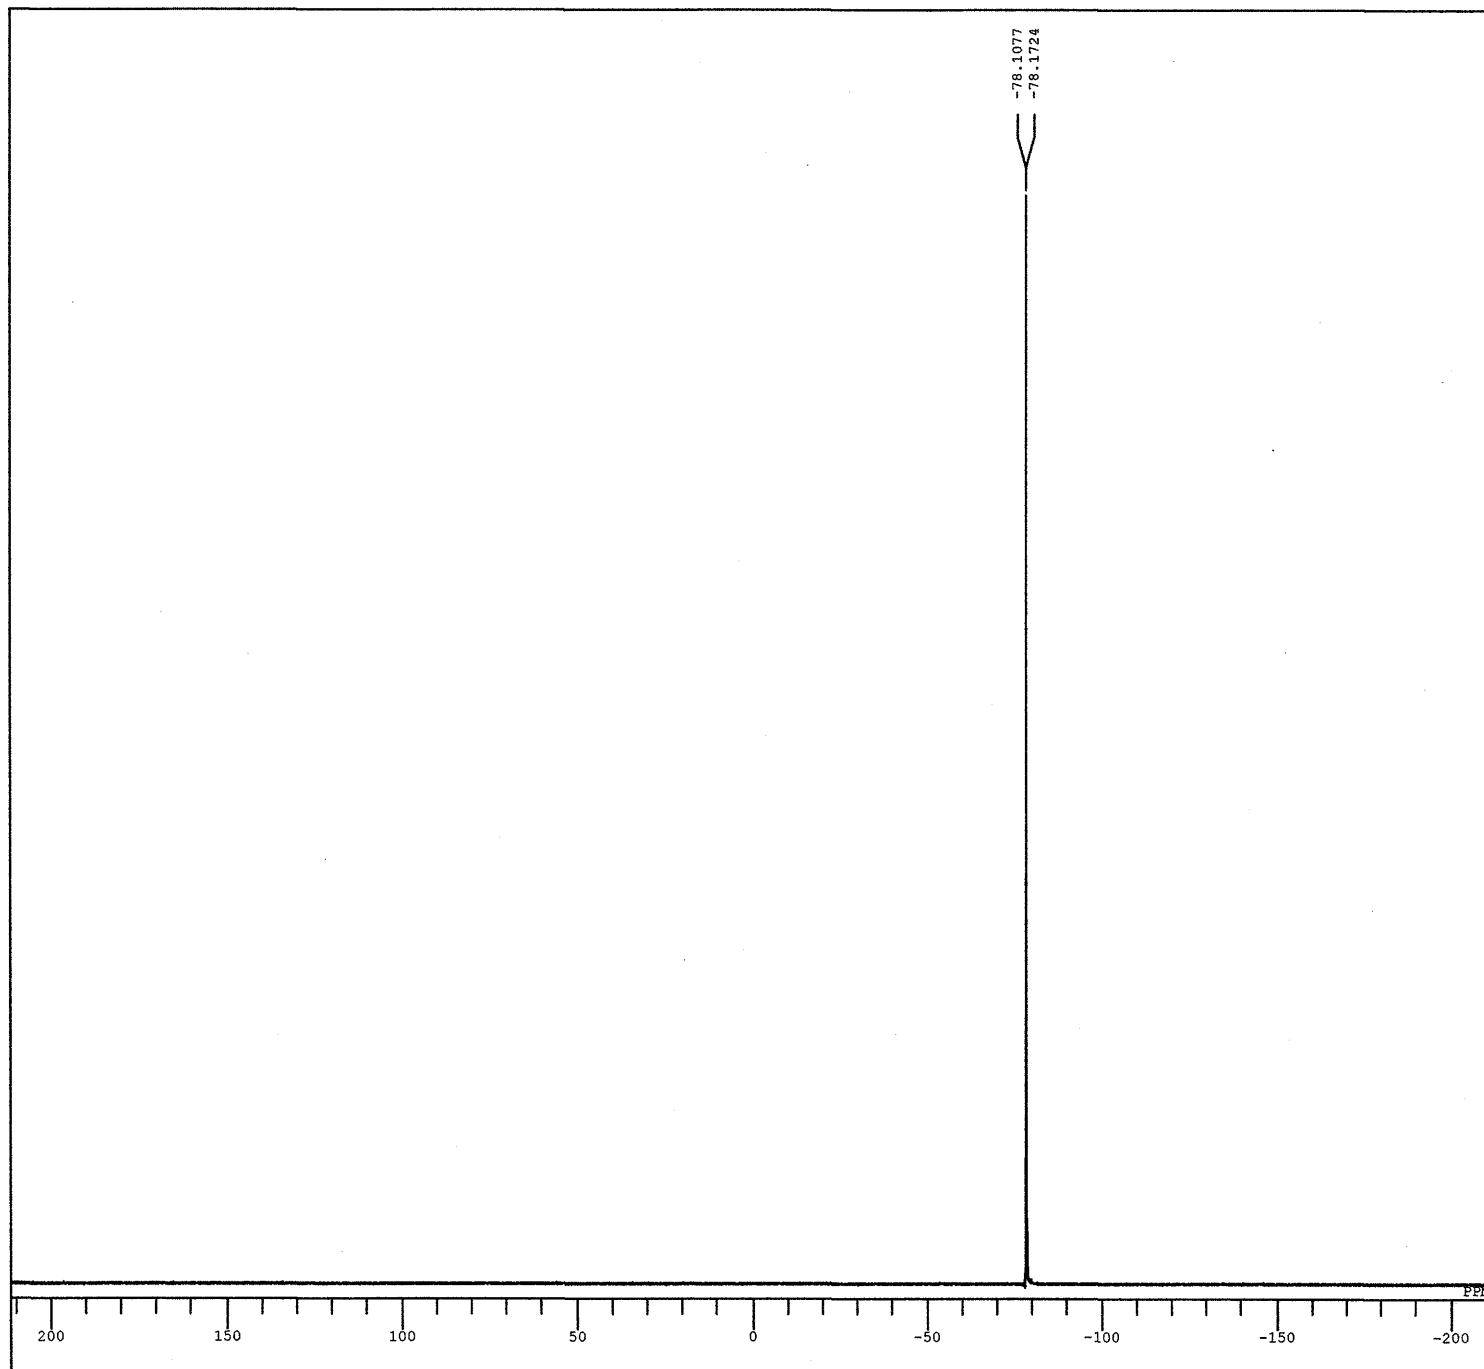

DFILE ozawa07-042\_19F.jdf  
COMNT 3-Me-5-OMOM, [O]  
DATIM 01-04-2015 16:44:15  
OBNUC 19F  
EXMOD proton.jxp  
OBFRQ 368.64 MHz  
OBSET 7.63 KHz  
OBFIN 2.85 Hz  
POINT 16384  
FREQU 195312.50 Hz  
SCANS 8  
ACQTM 0.0839 sec  
PD 5.0000 sec  
PW1 3.90 usec  
IRNUC 19F  
CTEMP 26.7 c  
SLVNT CDCL3  
EXREF -164.90 ppm  
BF 0.12 Hz  
RGAIN 50

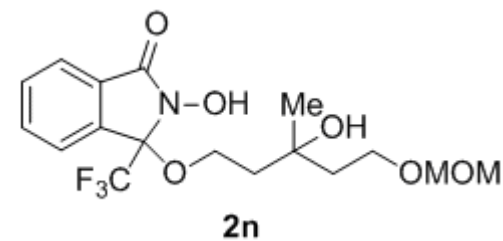





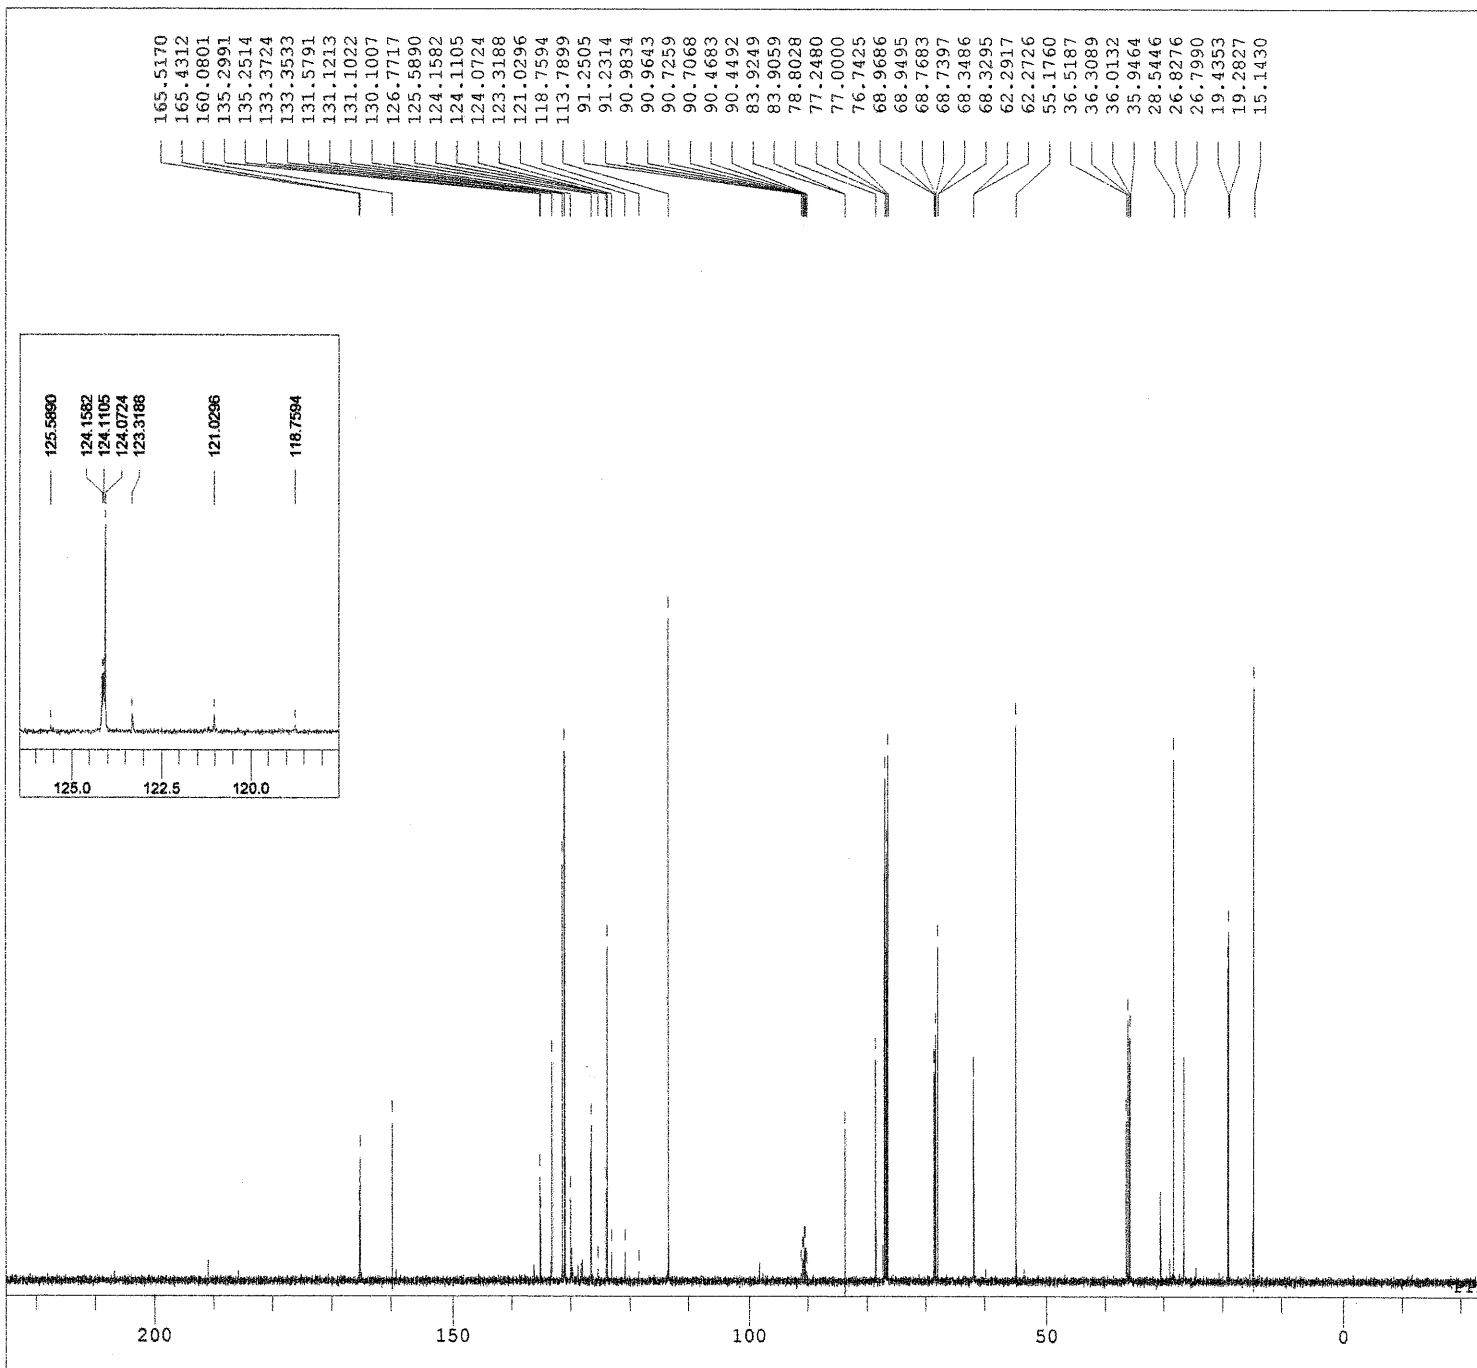

```

DFILE  ozawa07-085_13C.als
COMNT  3-Me-5-O(4-pentyne), PMB
DATIM  2015-04-13 14:36:59
OBNUC  13C
EXMOD  carbon.jxp
OBFRQ  125.77 MHz
OBSET  7.87 KHz
OBFIN  4.21 Hz
POINT  26214
FREQU  31446.54 Hz
SCANS  600
ACQTM  0.0000 sec
PD      2.0000 sec
PW1     3.40 usec
IRNUC  1H
CTEMP  27.8 c
SLVNT  CDCL3
EXREF  77.00 ppm
BF      0.12 Hz
RGAIN  60
    
```

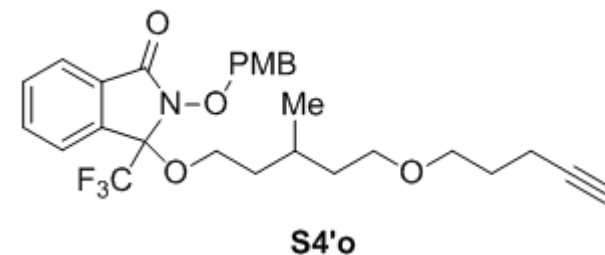

tert-yne, PMB

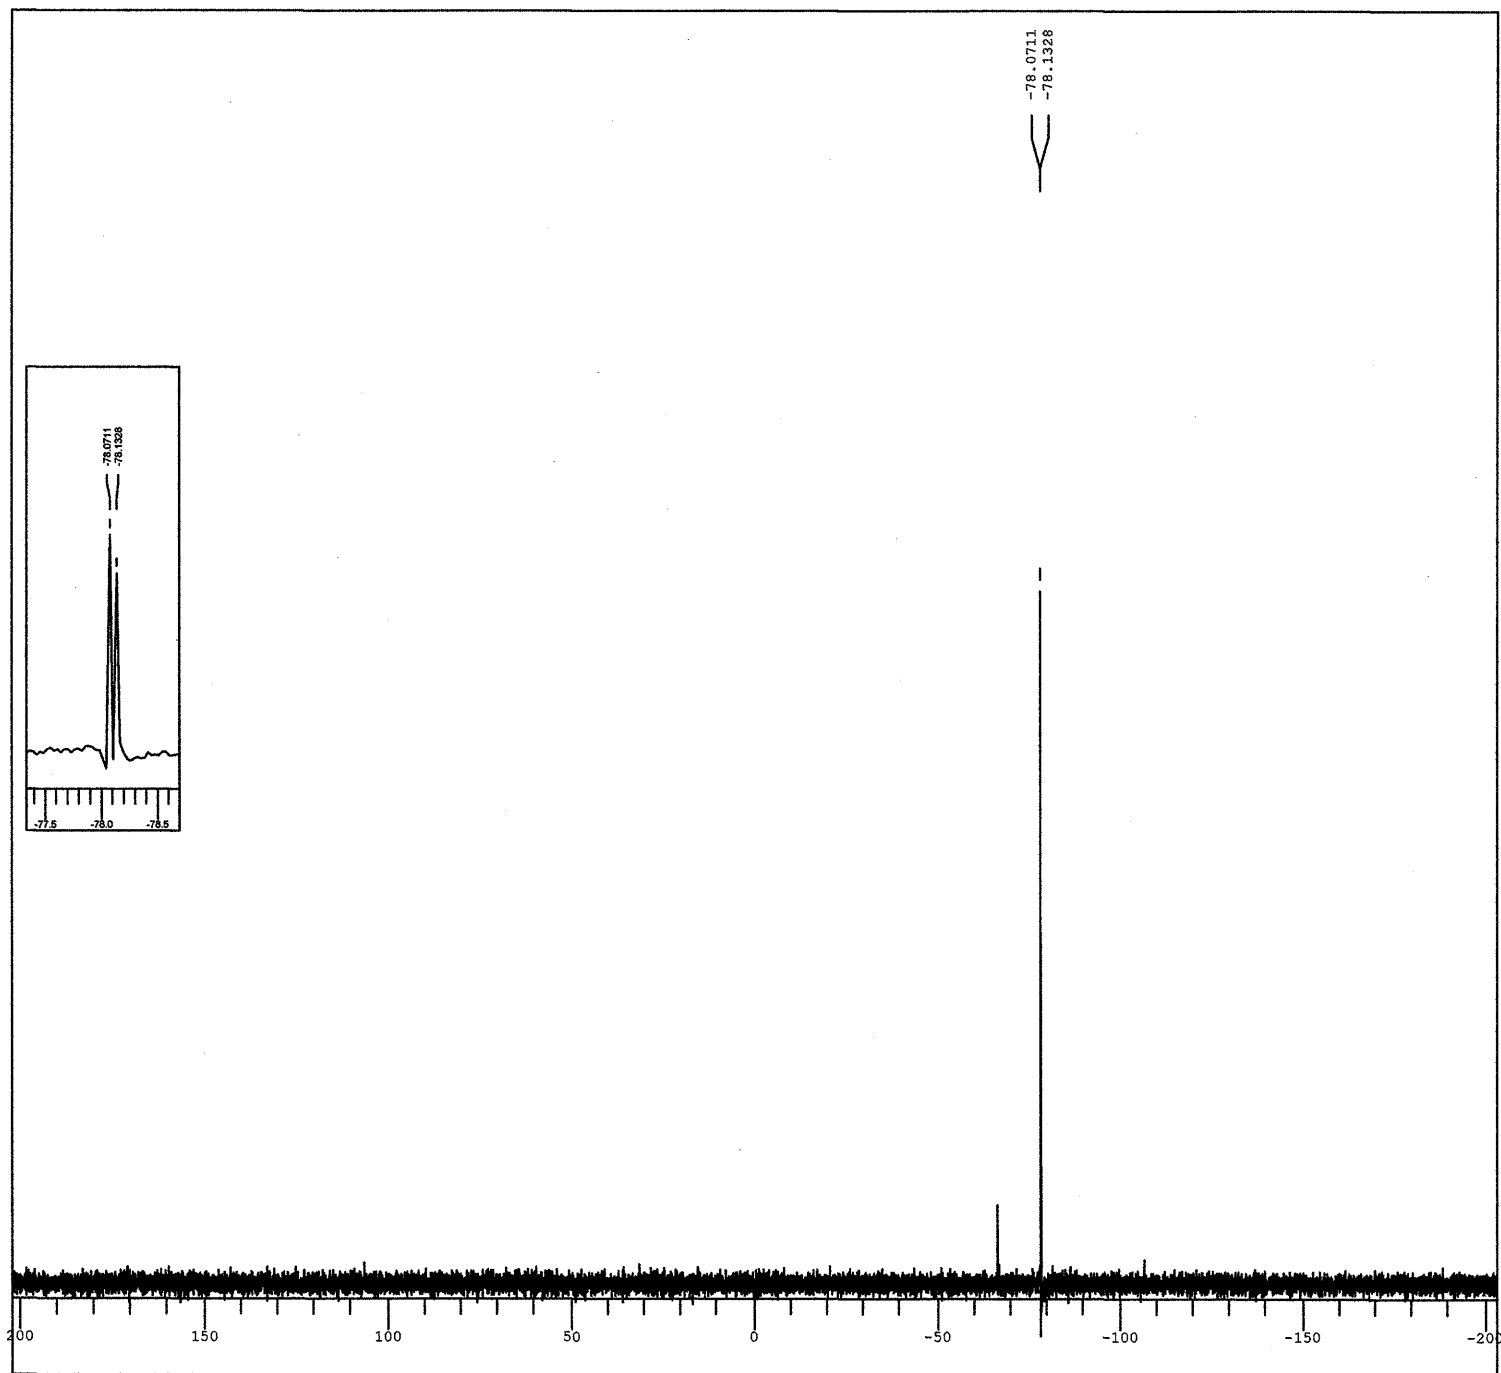

DFILE ozawa07-085\_19F.jdf  
COMNT tert-yne, PMB  
DATIM 11-05-2015 15:30:50  
OBNUC 19F  
EXMOD proton.jxp  
OBFRQ 368.64 MHz  
OBSET 7.63 KHz  
OBFIN 2.85 Hz  
POINT 16384  
FREQU 186567.17 Hz  
SCANS 4  
ACQTM 0.0878 sec  
PD 5.0000 sec  
PW1 3.90 usec  
IRNUC 19F  
CTEMP 21.6 c  
SLVNT CDCL3  
EXREF -164.90 ppm  
BF 0.12 Hz  
RGAIN 50

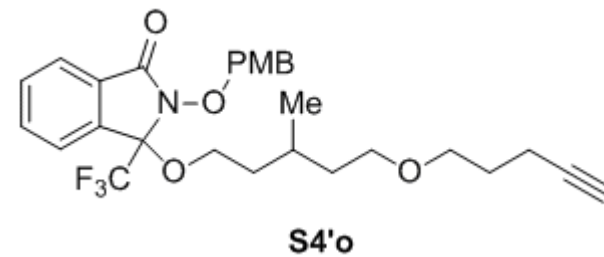

3-Me-5-O(4-pentyne), OH

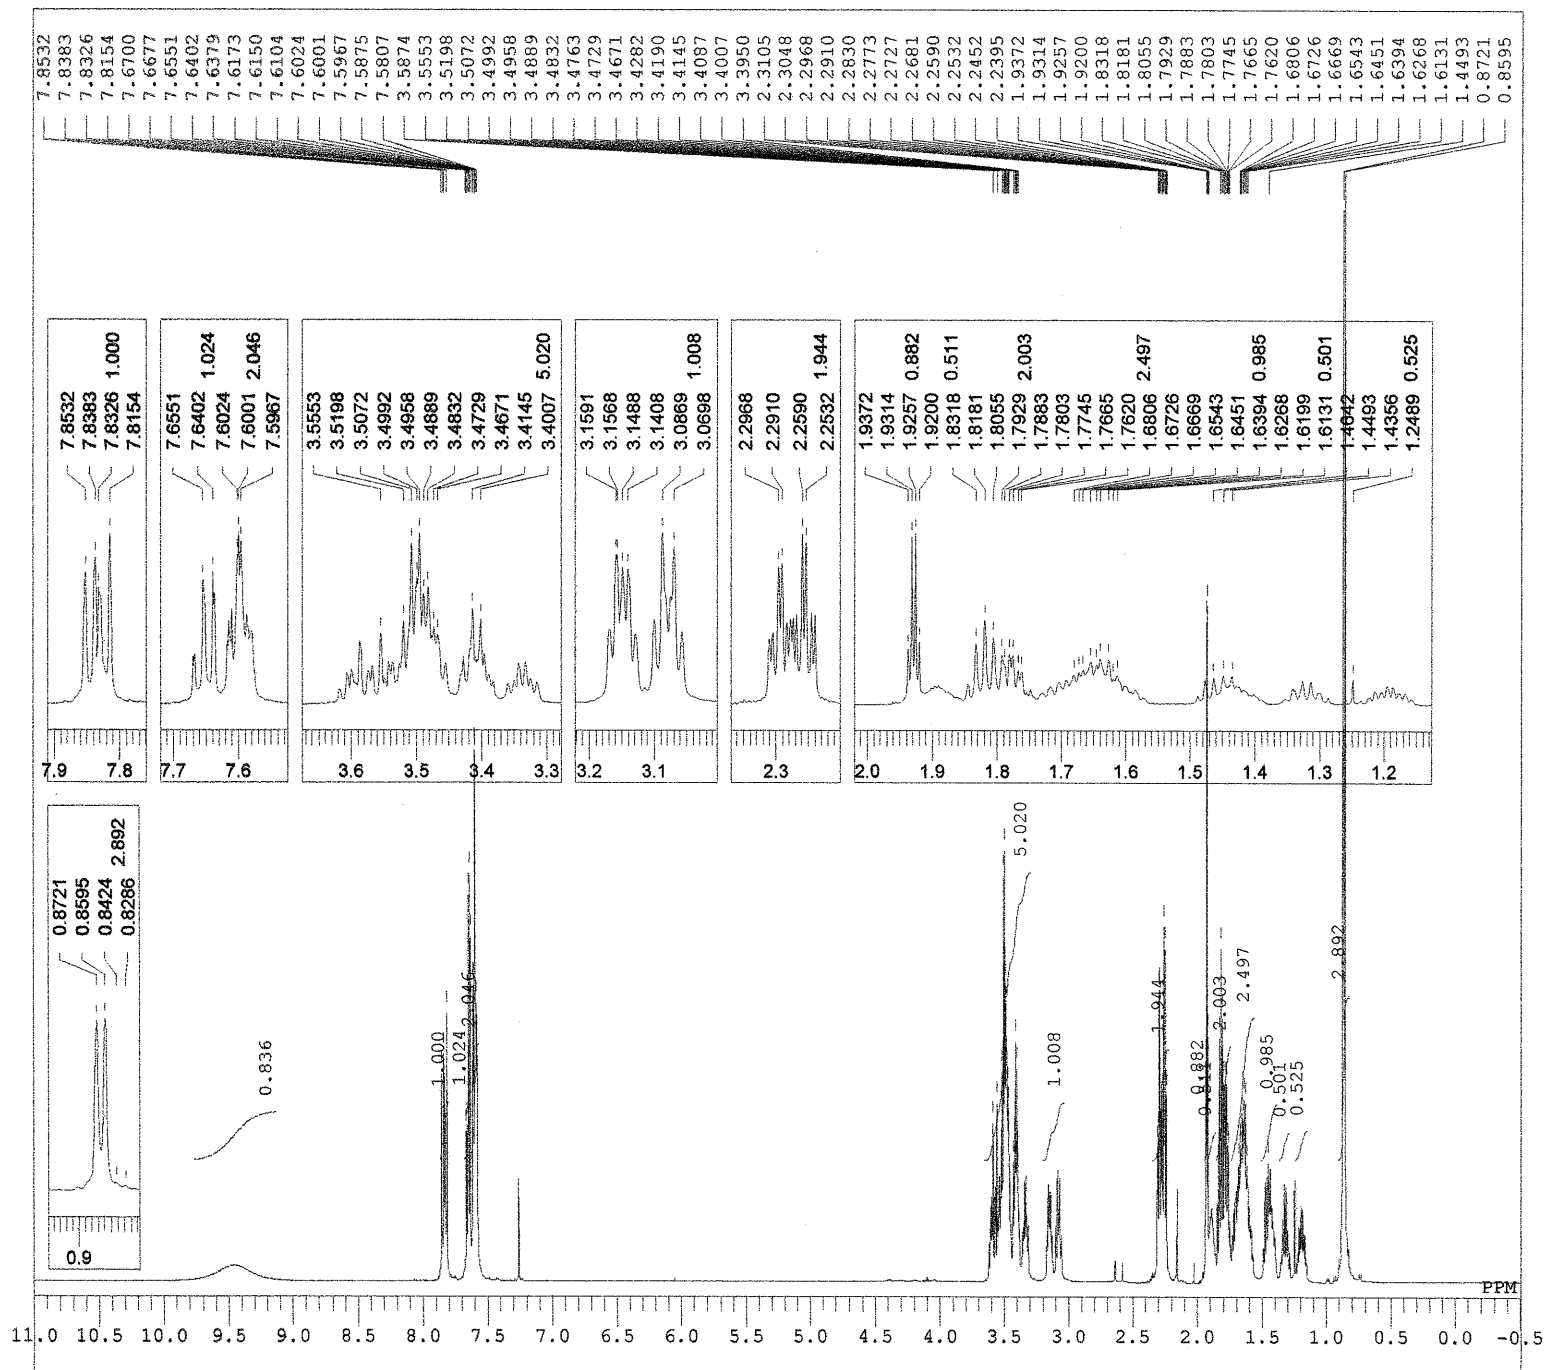

```

DFILE  ozawa07-099_1h.jdf
COMNT  3-Me-5-O(4-pentyne), OH
DATIM  2015-05-01 10:25:55
OBNUC  1H
EXMOD  proton.jxp
OBFREQ 500.16 MHz
OBSET  2.41 KHz
OBFIN  6.01 Hz
POINT  16384
FREQU  9384.38 Hz
SCANS  4
ACQTM  1.7459 sec
PD      5.0000 sec
PWL     5.55 usec
IRNUC  1H
CTEMP  21.1 c
SLVNT  CDCL3
EXREF  7.26 ppm
BF      0.12 Hz
RGAIN  24
    
```

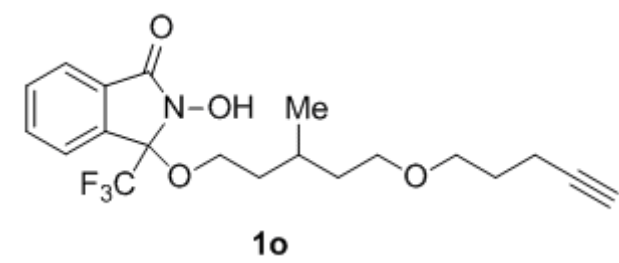

3-Me-5-O(4-pentyne), OH

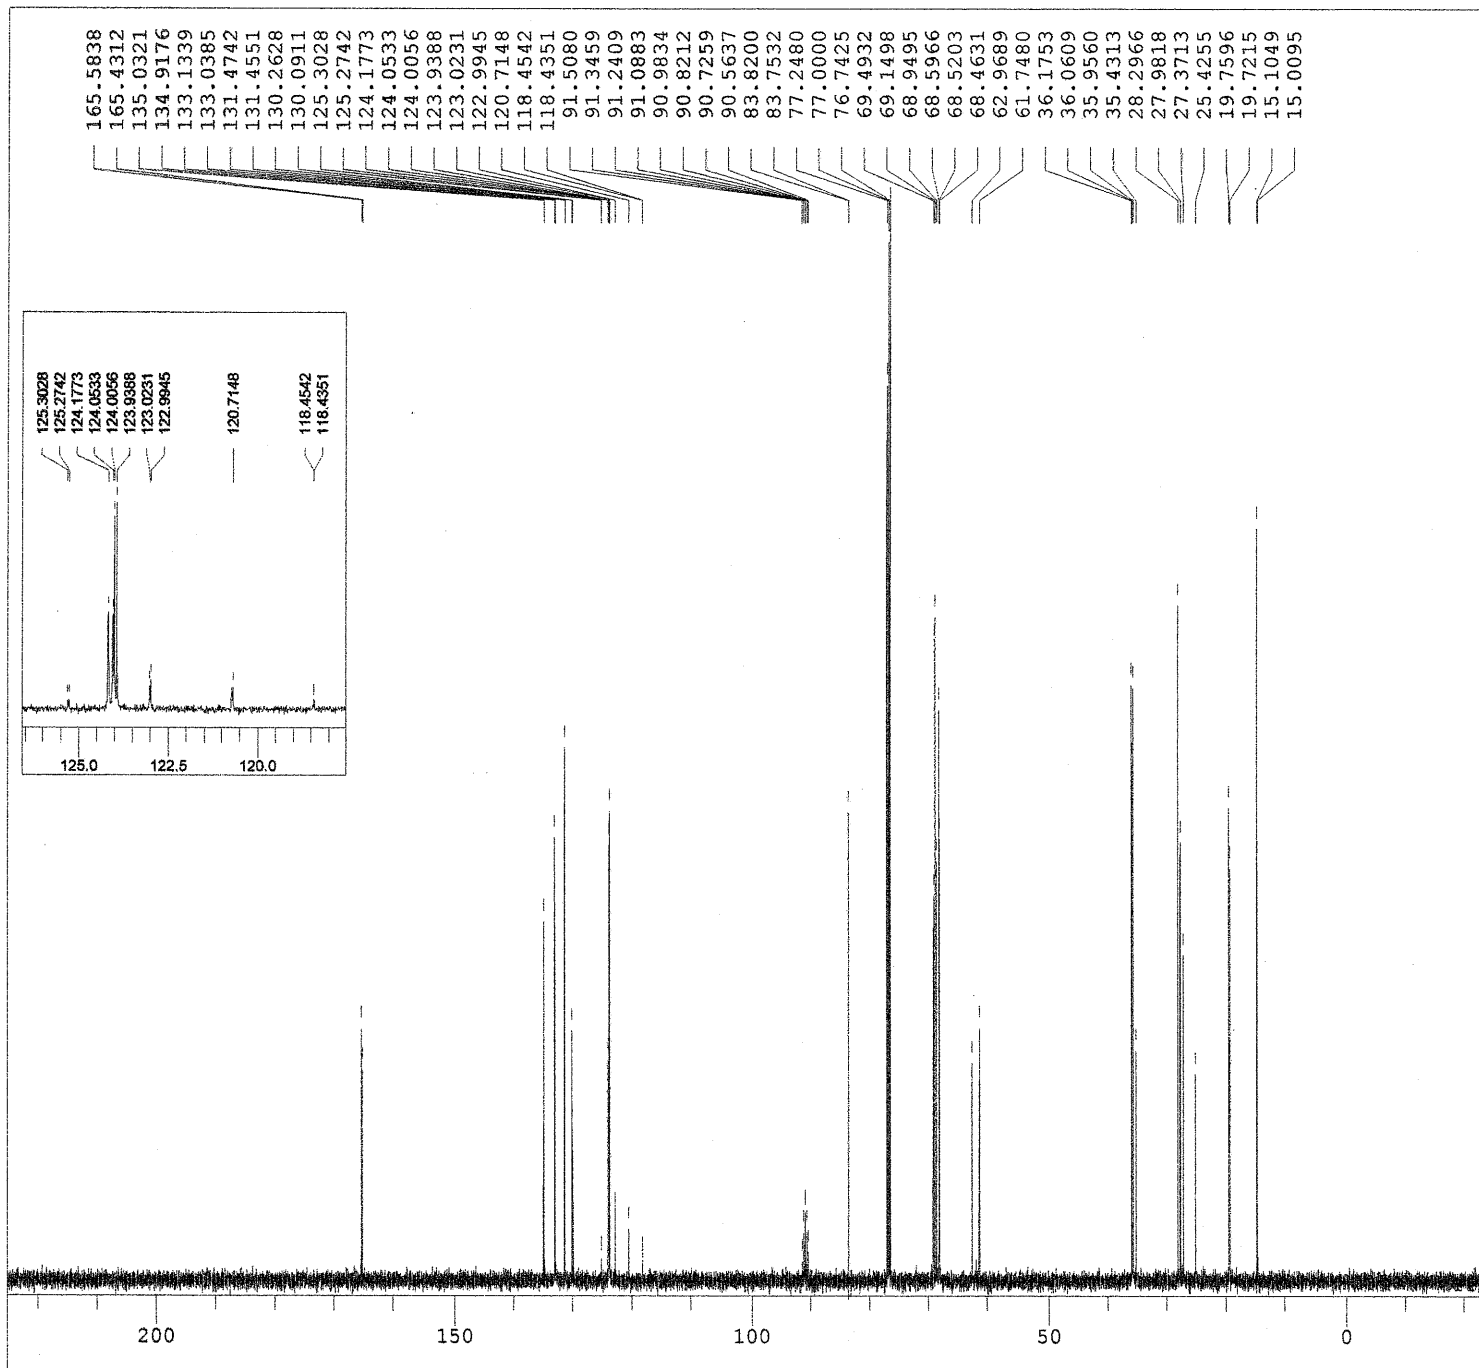

DFILE ozawa07-099\_13C.als  
COMNT 3-Me-5-O(4-pentyne), OH  
DATIM 2015-05-01 10:26:57  
OBNUC 13C  
EXMOD carbon.jxp  
OBFRQ 125.77 MHz  
OBSET 7.87 KHz  
OBFIN 4.21 Hz  
POINT 26214  
FREQU 31446.54 Hz  
SCANS 444  
ACQTM 0.8336 sec  
PD 2.0000 sec  
PW1 3.40 usec  
IRNUC 1H  
CTEMP 21.8 c  
SLVNT CDCL3  
EXREF 77.00 ppm  
BF 0.12 Hz  
RGAIN 60

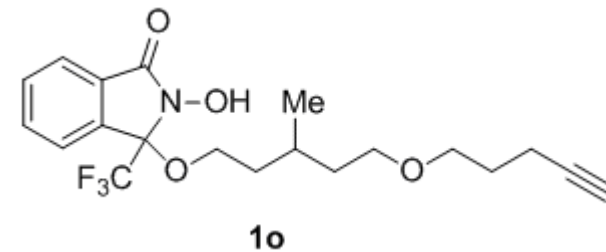

tert-yne, OH

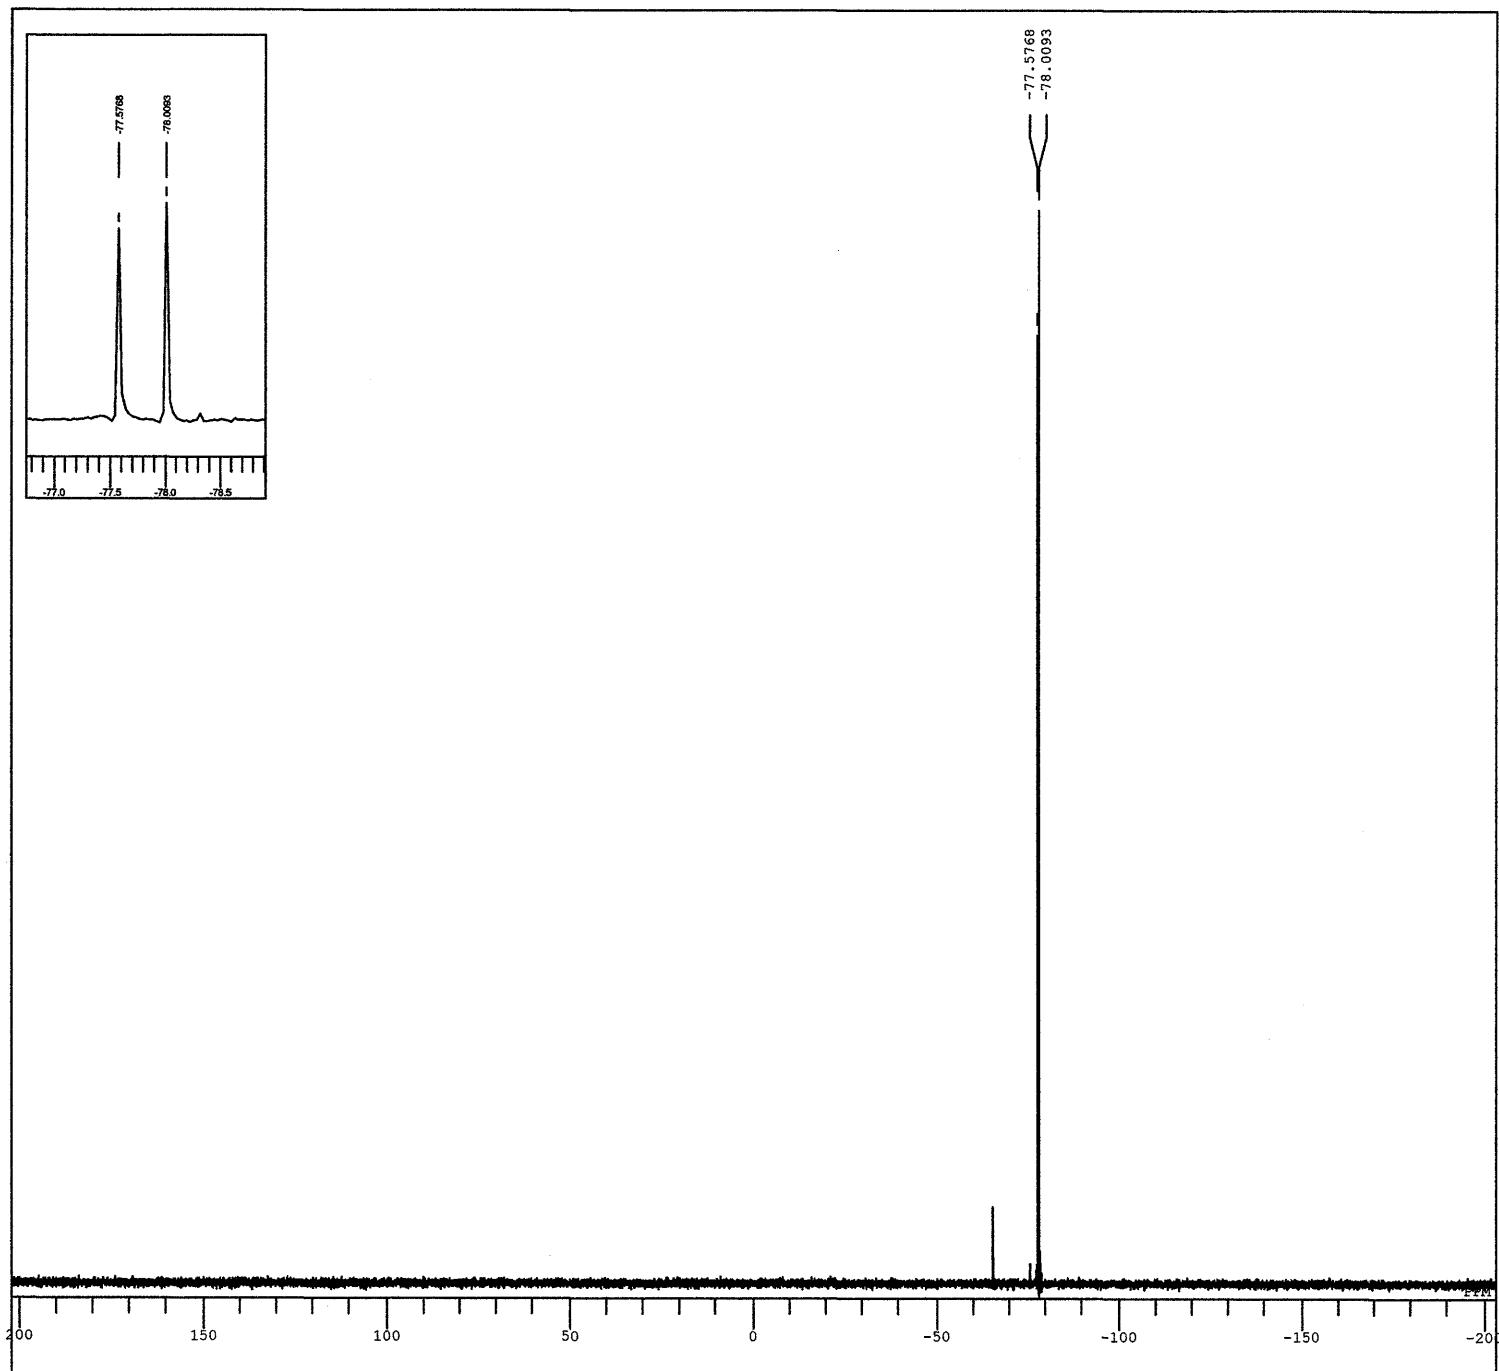

DFILE ozawa07-099\_19F.jdf  
COMNT tert-yne, OH  
DATIM 11-05-2015 15:33:38  
OBNUC 19F  
EXMOD proton.jxp  
OBFREQ 368.64 MHz  
OBSET 7.63 KHz  
OBFIN 2.85 Hz  
POINT 16384  
FREQU 186567.17 Hz  
SCANS 8  
ACQTM 0.0878 sec  
PD 5.0000 sec  
PW1 3.90 usec  
IRNUC 19F  
CTEMP 21.6 c  
SLVNT CDCL3  
EXREF -164.90 ppm  
BF 0.12 Hz  
RGAIN 50

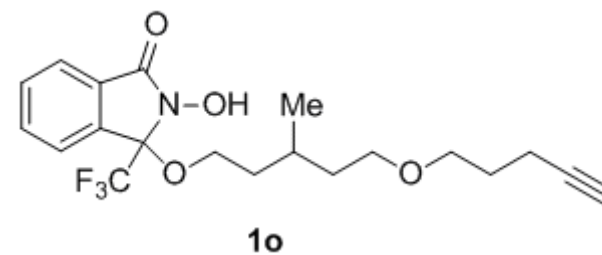

tert-yne, [0]

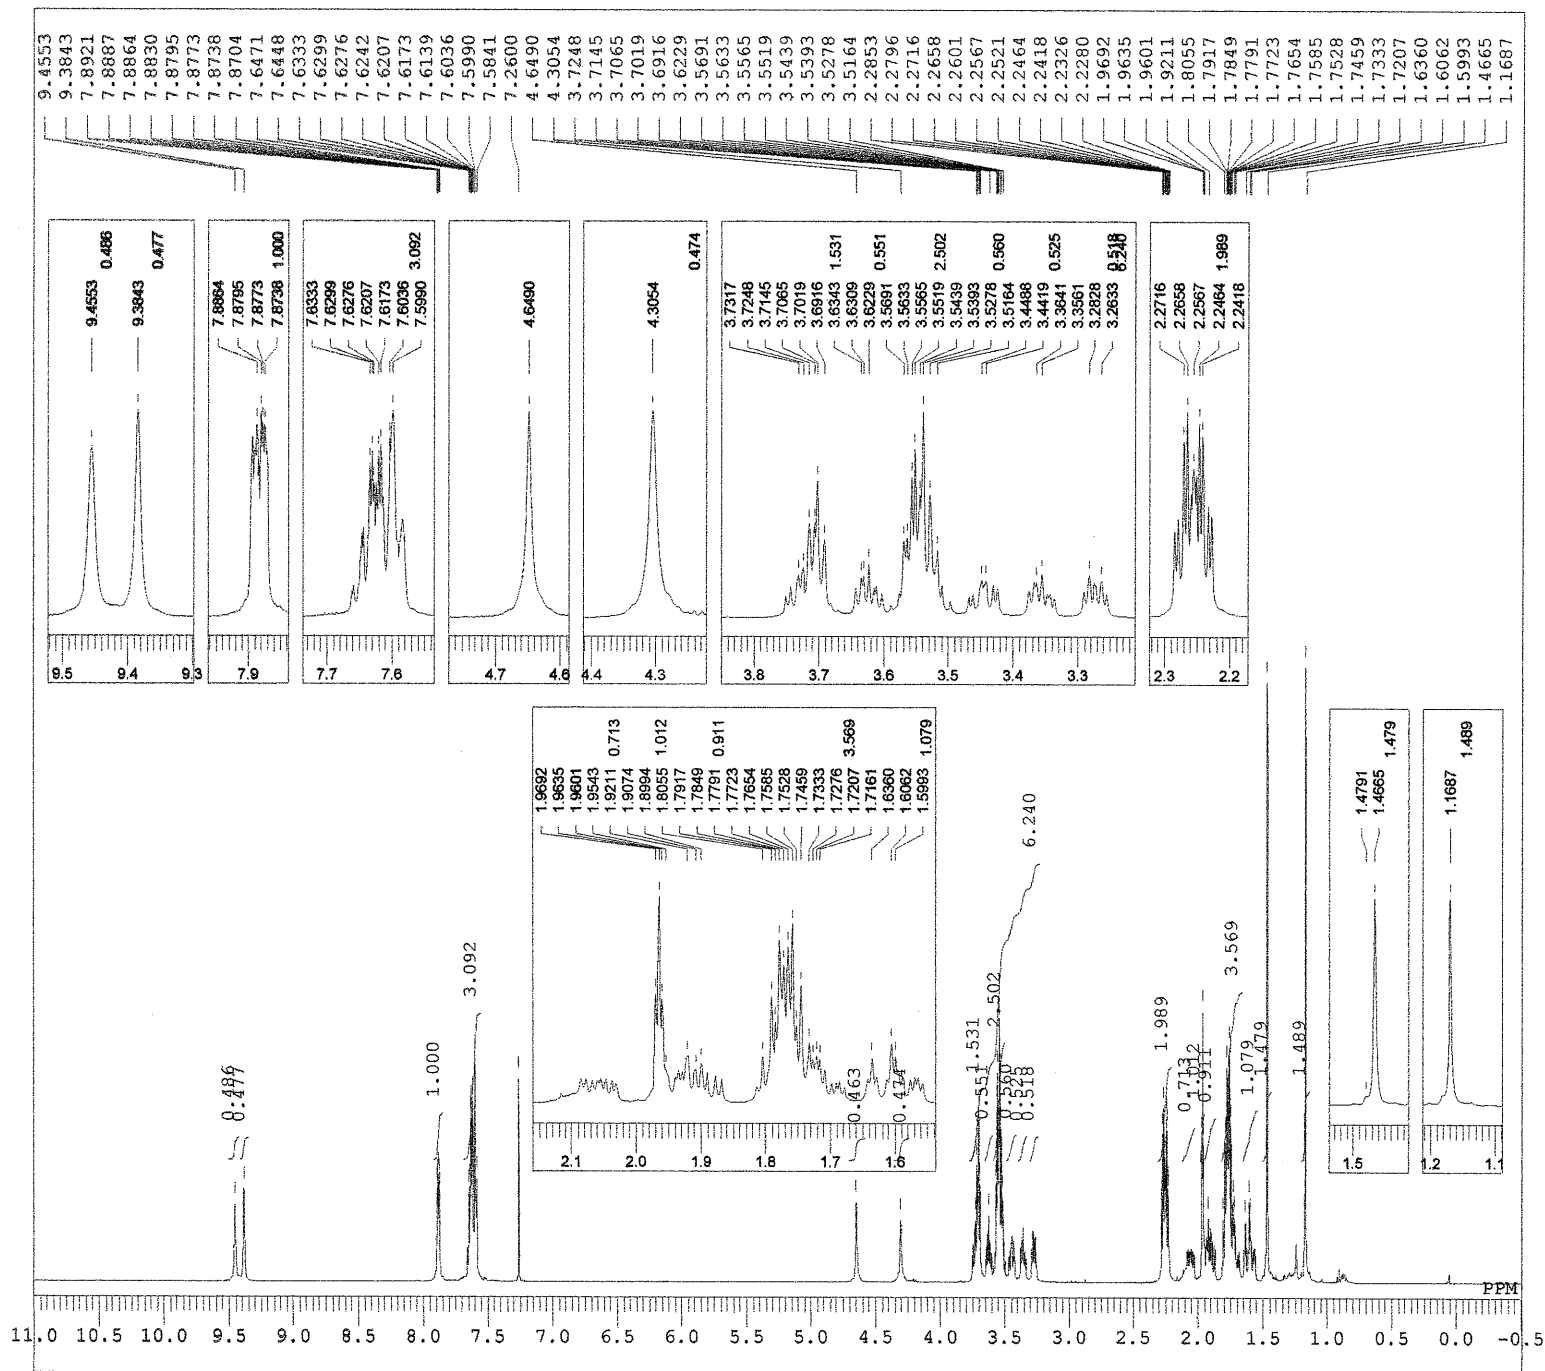

DFILE ozawa07-102\_PTL1\_1H.jdf  
 COMNT tert-yne, [0]  
 DATIM 2015-05-11 15:01:17  
 OBNUC 1H  
 EXMOD proton.jxp  
 OBFRQ 500.16 MHz  
 OBSET 2.41 KHz  
 OBFIN 6.01 Hz  
 POINT 16384  
 FREQU 9384.38 Hz  
 SCANS 8  
 ACQTM 1.7459 sec  
 PD 5.0000 sec  
 PW1 5.55 usec  
 IRNUC 1H  
 CTEMP 21.3 c  
 SLVNT CDCL3  
 EXREF 7.26 ppm  
 BF 0.12 Hz  
 RGAIN 30

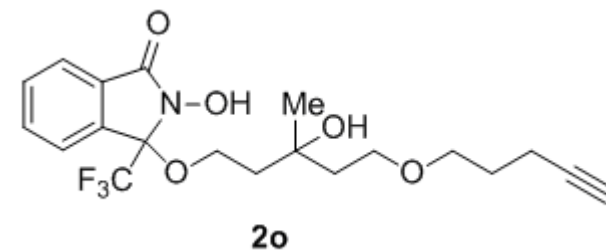

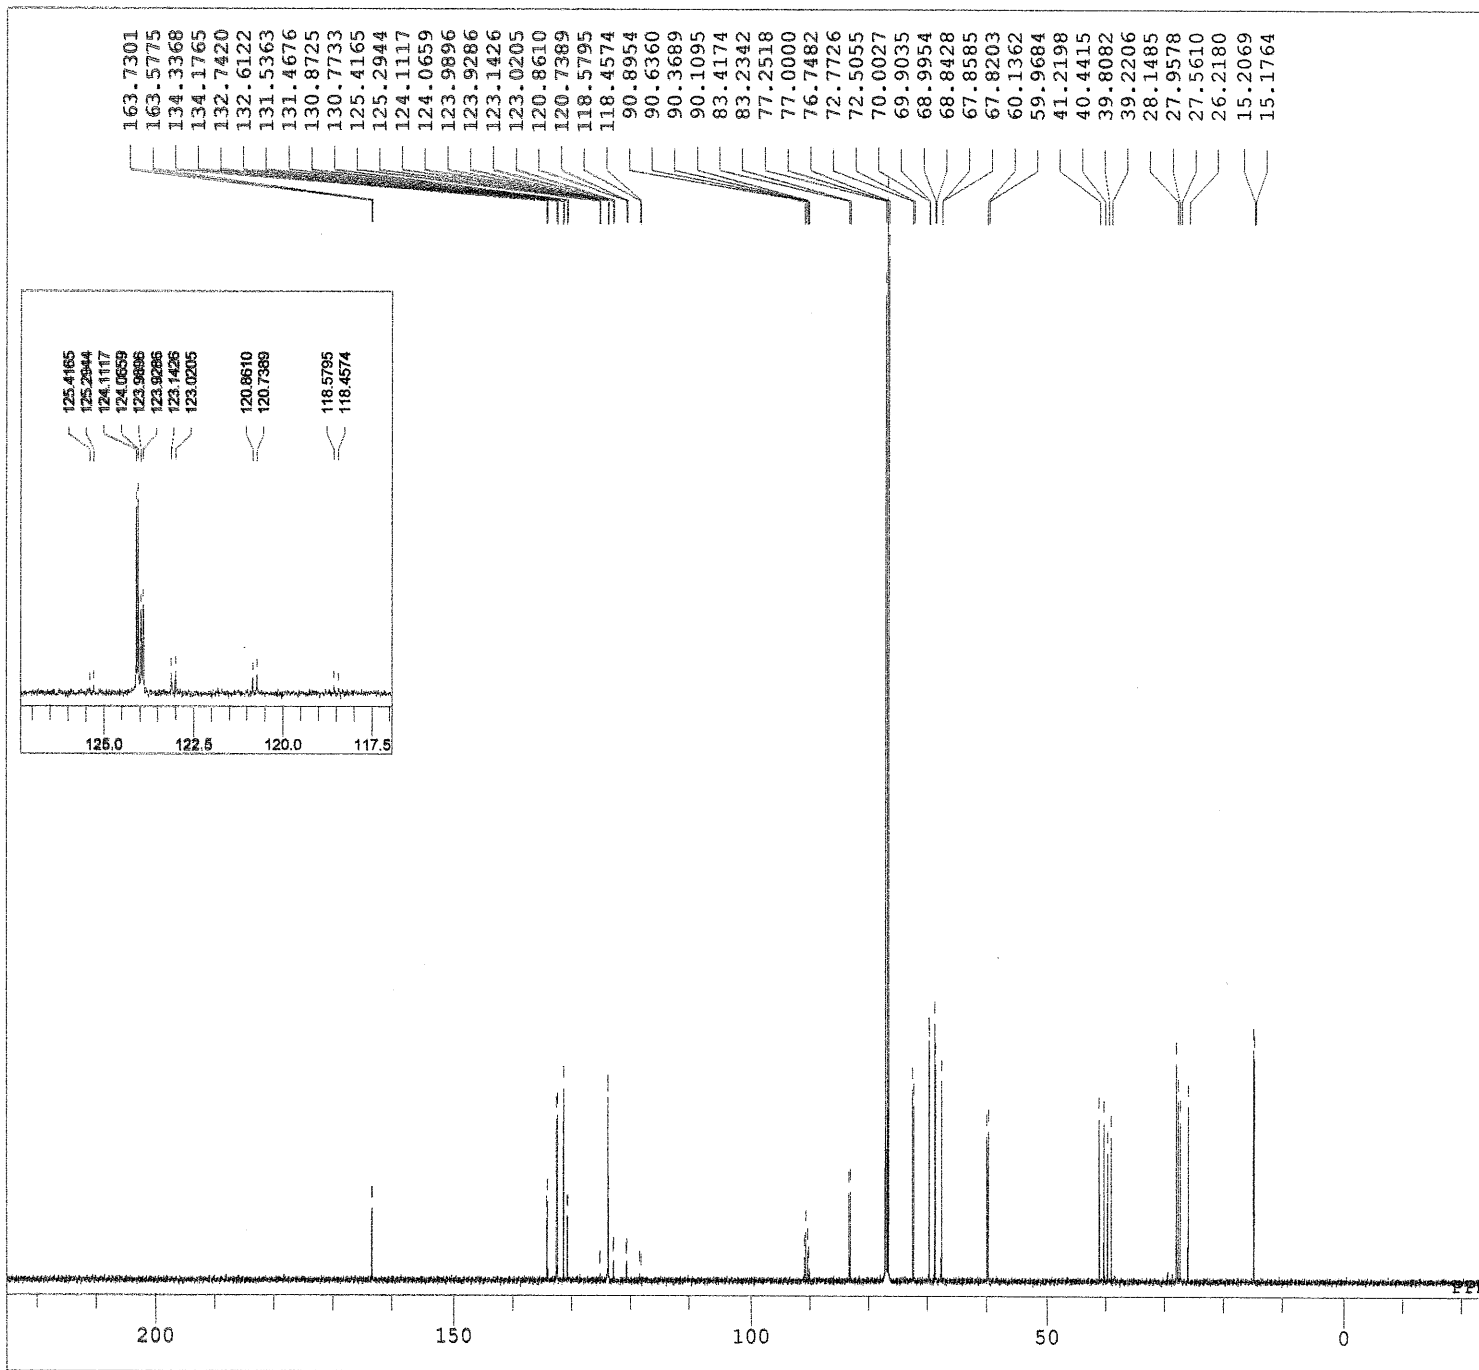

DFILE ozawa07-102\_13C.jdf  
 COMMT tert-yne, [O]  
 DATIM 2015-05-12 17:50:02  
 OBNUC 13C  
 EXMOD carbon.jxp  
 OBFREQ 125.77 MHz  
 OBSET 7.87 KHz  
 OBFIN 4.21 Hz  
 POINT 32768  
 FREQU 31446.54 Hz  
 SCANS 2662  
 ACQTM 1.0420 sec  
 PD 2.0000 sec  
 PW1 3.40 usec  
 IRNUC 1H  
 CTEMP 21.8 c  
 SLVNT CDCL3  
 EXREF 77.00 ppm  
 BF 0.42 Hz  
 RGAIN 72

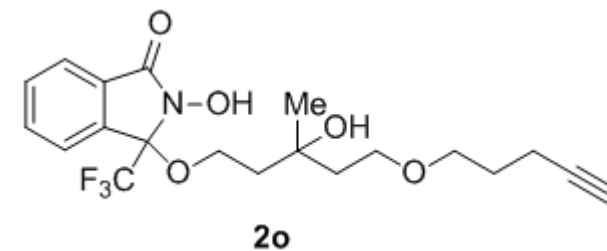

tert-yne, [0]

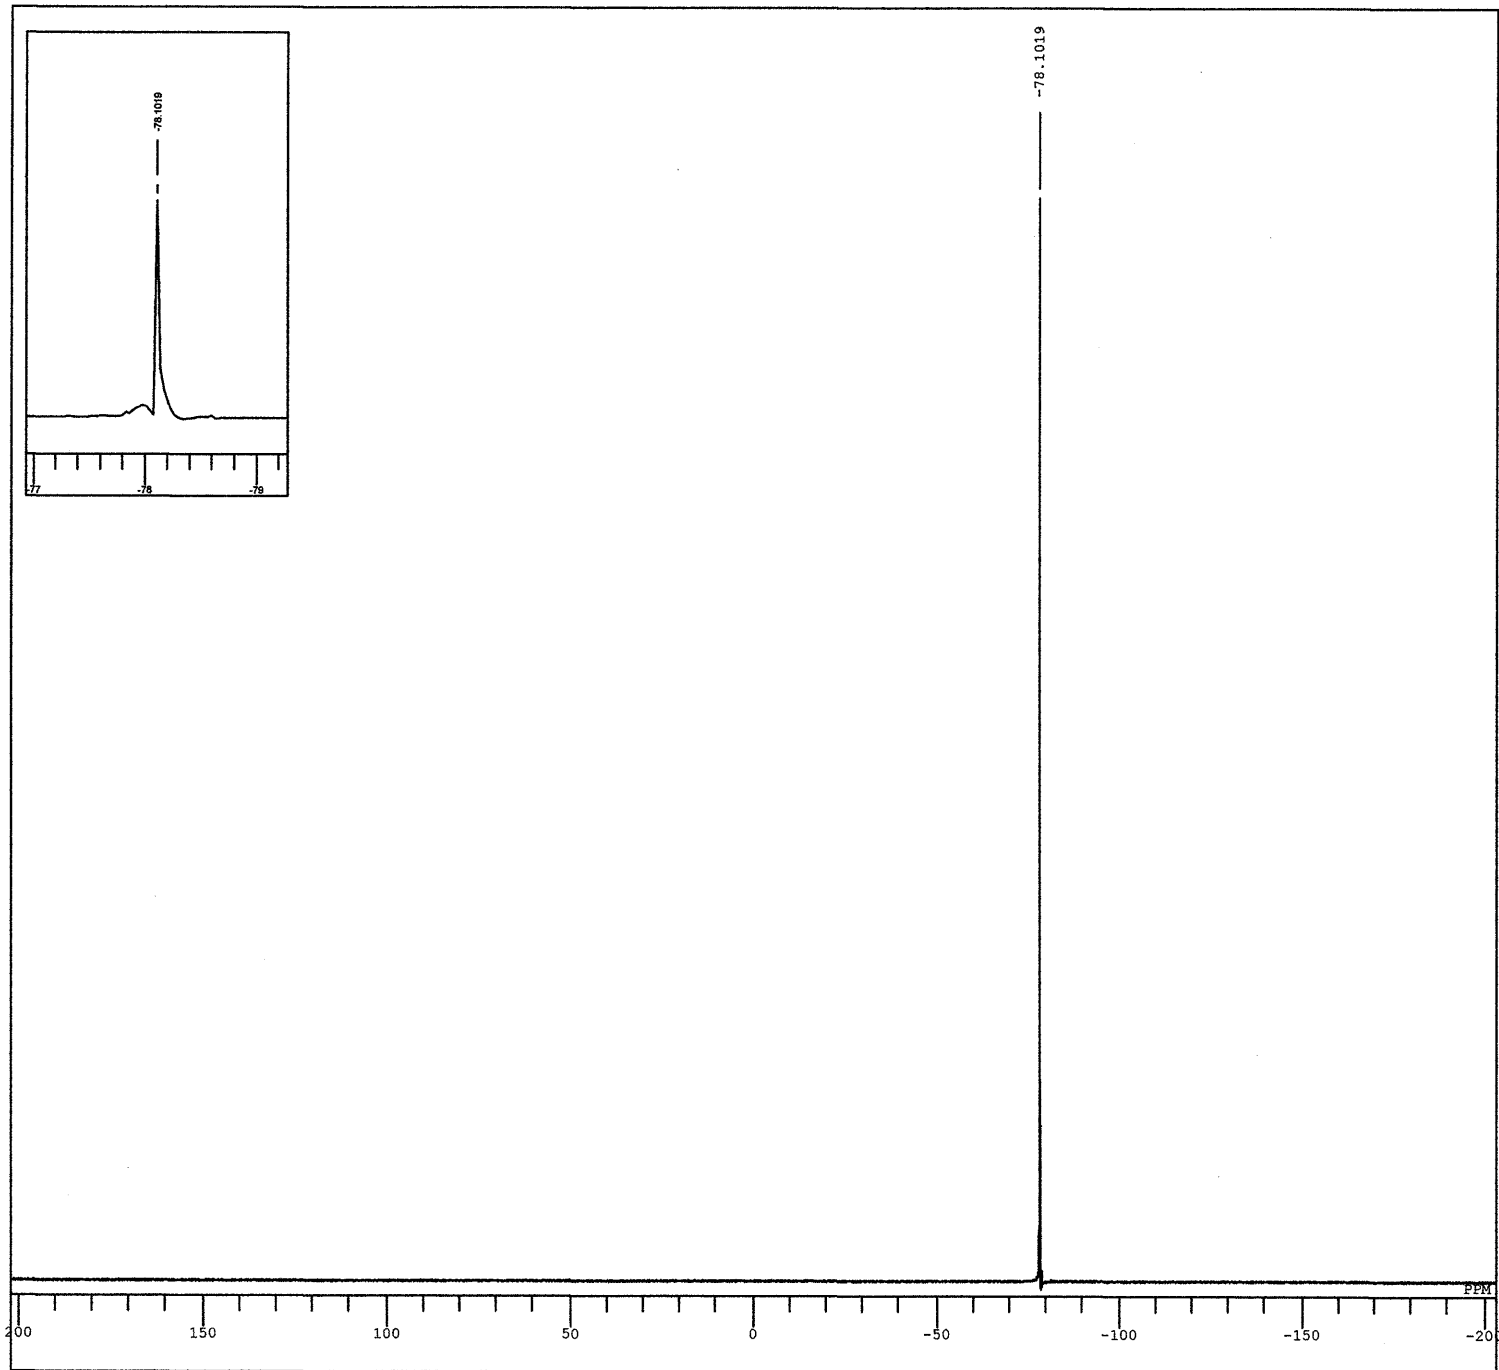

DFILE ozawa07-102\_19F.jdf  
COMNT tert-yne, [0]  
DATIM 11-05-2015 15:37:59  
OBNUC 19F  
EXMOD proton.jxp  
OBFRQ 368.64 MHz  
OBSET 7.63 KHz  
OBFIN 2.85 Hz  
POINT 16384  
FREQU 186567.17 Hz  
SCANS 8  
ACQTM 0.0878 sec  
PD 5.0000 sec  
PW1 3.90 usec  
IRNUC 19F  
CTEMP 21.6 c  
SLVNT CDCL3  
EXREF -164.90 ppm  
BF 0.12 Hz  
RGAIN 50

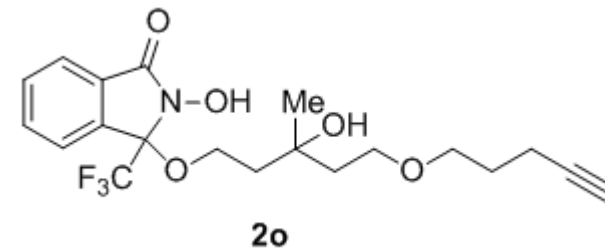



3-Me-7-octenol

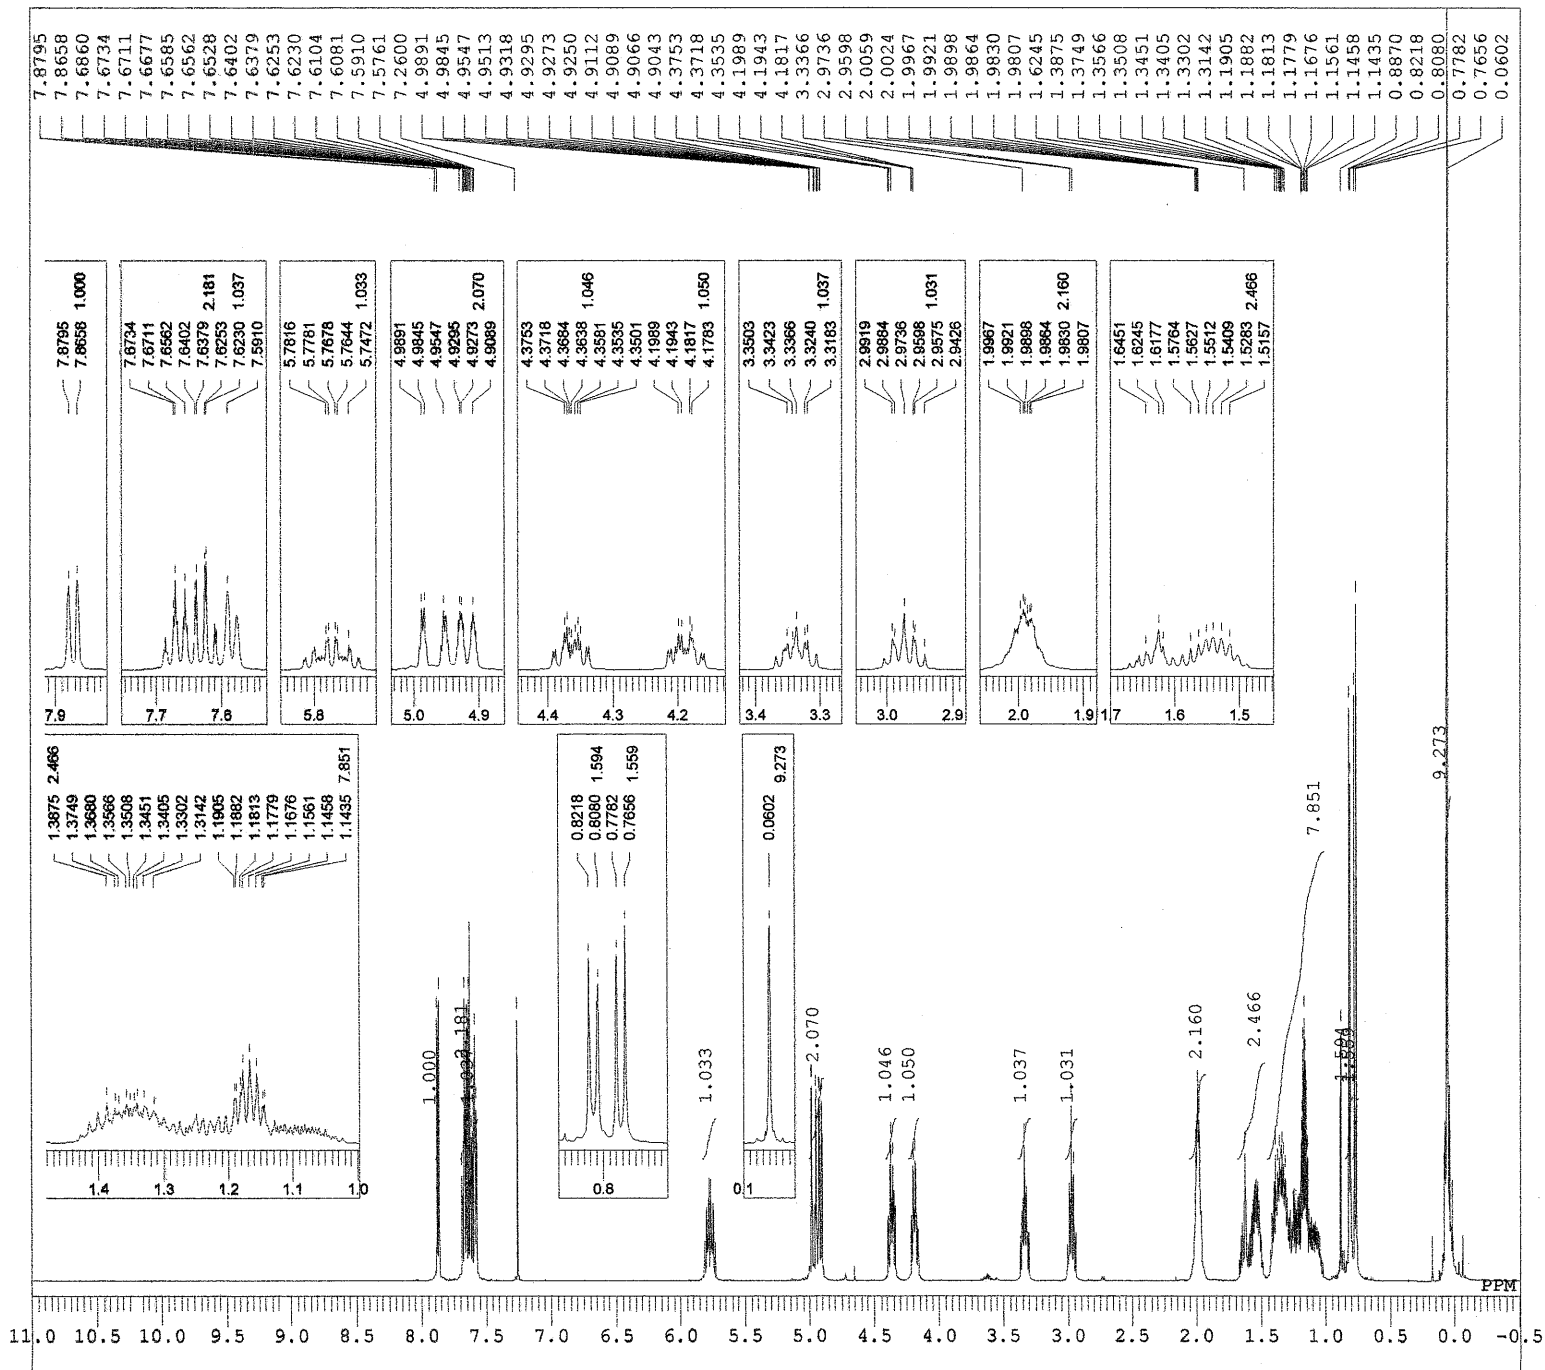

DFILE ozawa06-065\_1h.jdf  
 COMTM 3-Me-7-octenol  
 DATIM 2014-12-05 15:50:55  
 OBNUC 1H  
 EXMOD proton.jxp  
 OBFRO 500.16 MHz  
 OBSSE 2.41 KHz  
 OBFIN 6.01 Hz  
 POINT 16384  
 FREQU 9384.38 Hz  
 SCANS 8  
 ACQTM 1.7459 sec  
 PD 5.0000 sec  
 PW1 5.55 usec  
 IRNUC 1H  
 CTEMP 25.5 c  
 SLVNT CDCL3  
 EXREF 7.26 ppm  
 BF 0.12 Hz  
 RGAIN 28

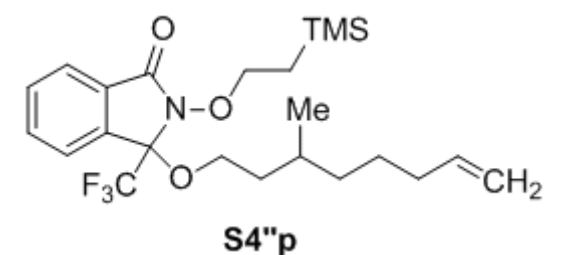

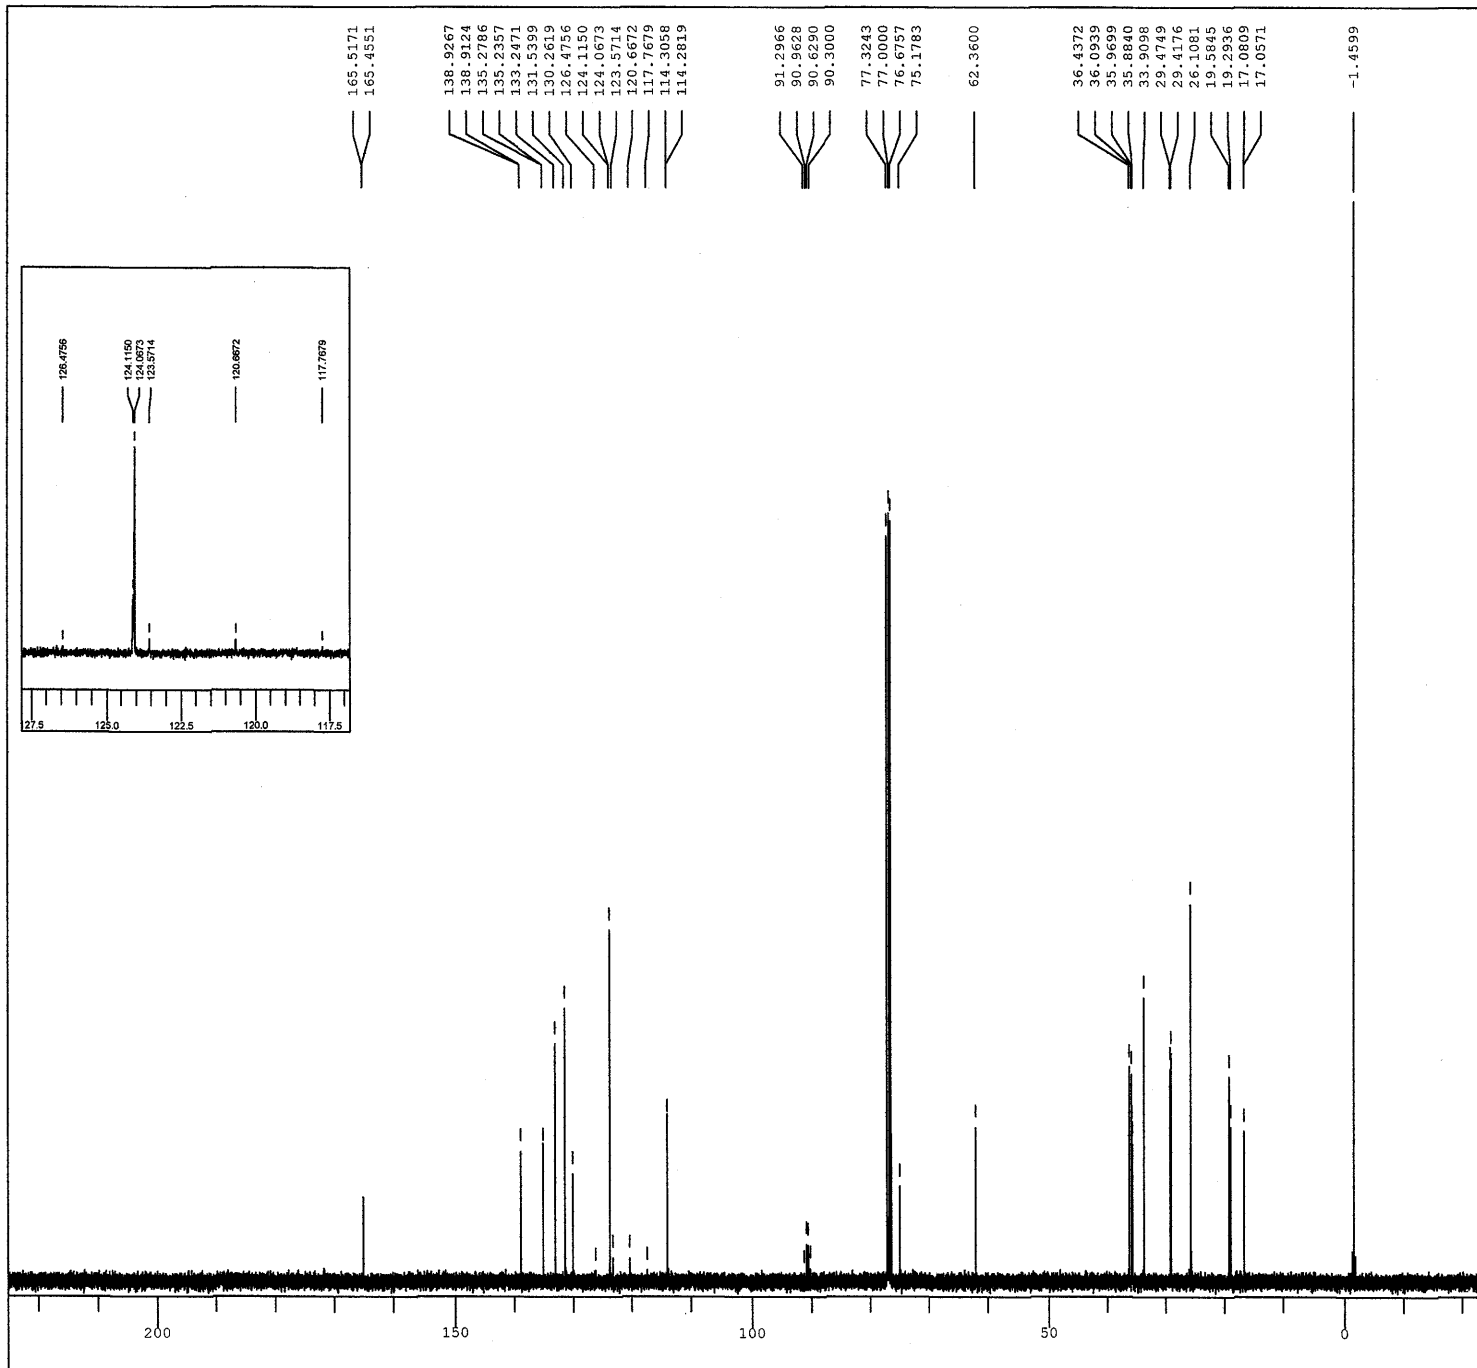

DFILE ozawa06-065\_13C.jdf  
 COMNT 3-Me-7-octenol  
 DATIM 06-12-2014 07:15:47  
 OBNUC 13C  
 EXMOD carbon.jxp  
 OBFREQ 98.52 MHz  
 OBSSET 4.64 KHz  
 OBFIN 8.74 Hz  
 POINT 65535  
 FREQ 30788.18 Hz  
 SCANS 452  
 ACQTM 2.1286 sec  
 PD 2.0000 sec  
 PW1 3.07 usec  
 IRNUC 1H  
 CTEMP 22.3 c  
 SLVNT CDCL3  
 EXREF 77.00 ppm  
 BF 0.12 Hz  
 RGAIN 60

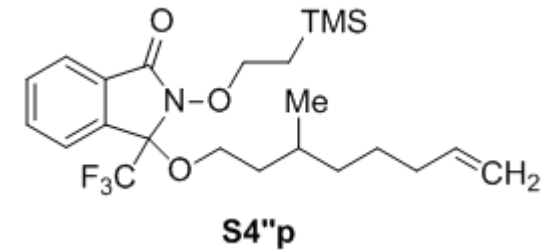

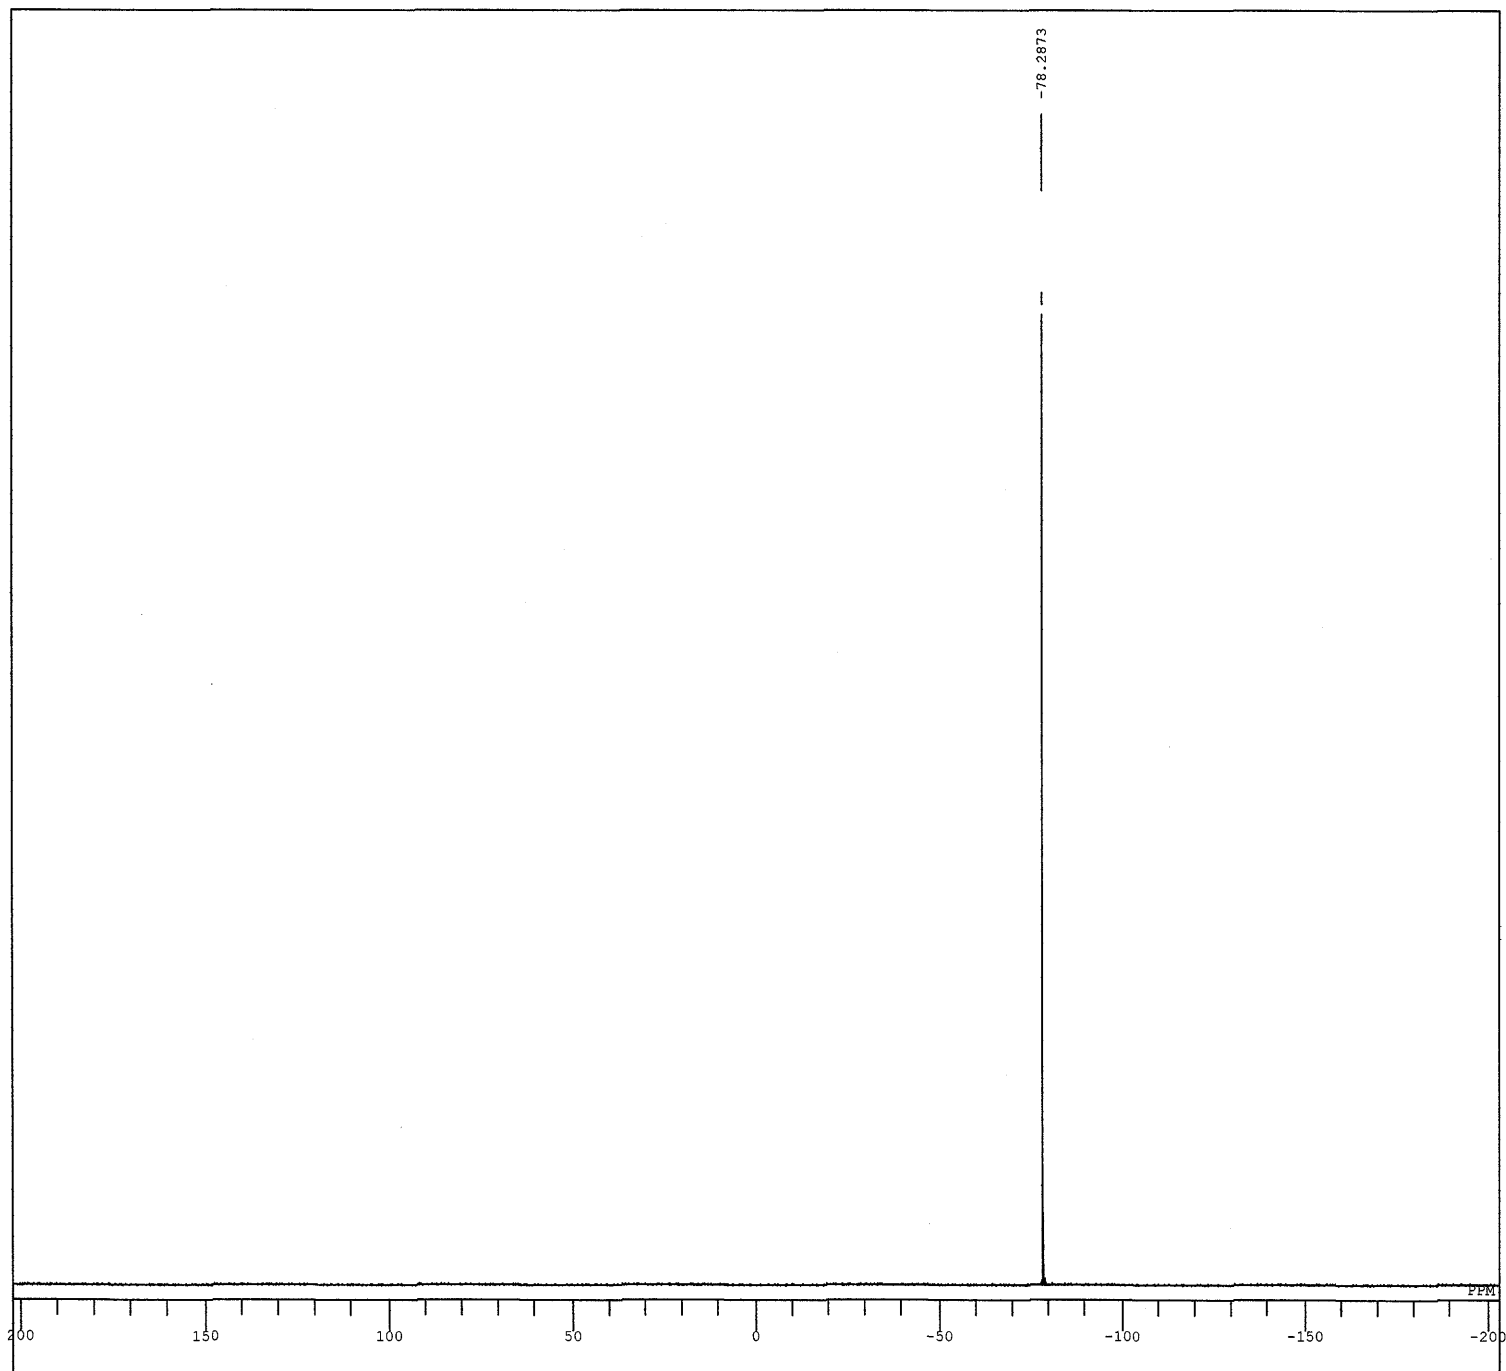

DFILE ozawa06-065\_19F.jdf  
COMNT 3-Me-7-octenol  
DATIM 06-12-2014 07:48:48  
OBNUC 19F  
EXMOD proton.jxp  
OBFREQ 368.64 MHz  
OBSEF 7.63 KHz  
OBFIN 2.85 Hz  
POINT 16384  
FREQU 186567.17 Hz  
SCANS 4  
ACQTM 0.0878 sec  
PD 5.0000 sec  
PWI 3.90 usec  
IRNUC 19F  
CTEMP 22.1 c  
SLVNT CDCL3  
EXREF -164.90 ppm  
BF 0.12 Hz  
RGAIN 48

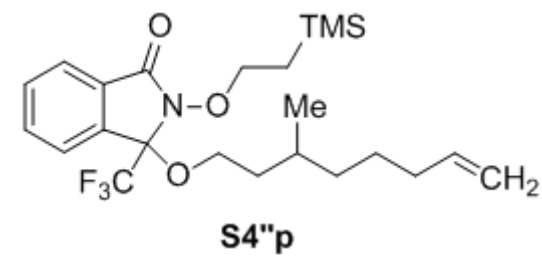



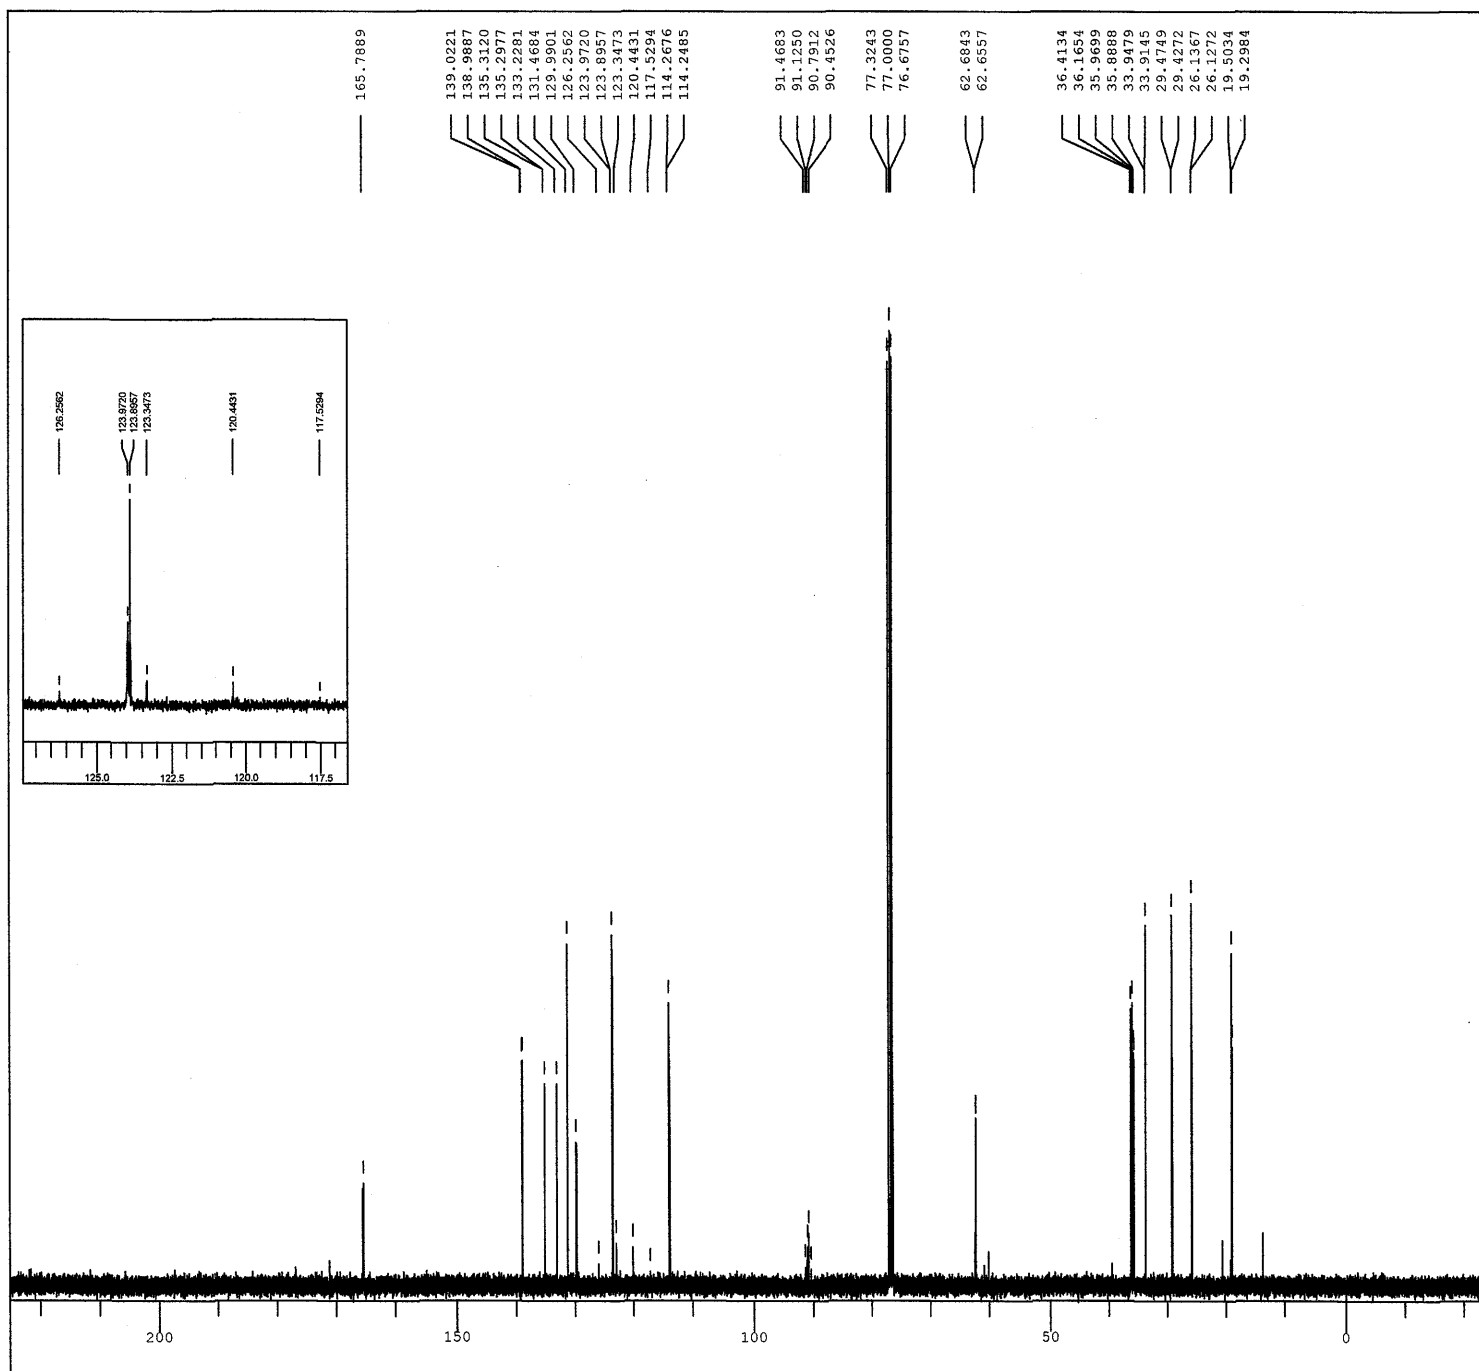

DFILE ozawa06-071\_13C.jdf  
 COMNT 3-Me-7-octenol, OH  
 DATIM 06-12-2014 08:44:07  
 OBNUC 13C  
 EXMOD carbon.jxp  
 OBFRO 98.52 MHz  
 OBSET 4.64 KHz  
 OBFIN 8.74 Hz  
 POINT 65535  
 FREQU 30788.18 Hz  
 SCANS 404  
 ACQTM 2.1286 sec  
 PD 2.0000 sec  
 PW1 3.07 usec  
 IRNUC 1H  
 CTEMP 22.3 c  
 SLVNT CDCL3  
 EXREF 77.00 ppm  
 BF 0.12 Hz  
 RGAIN 60

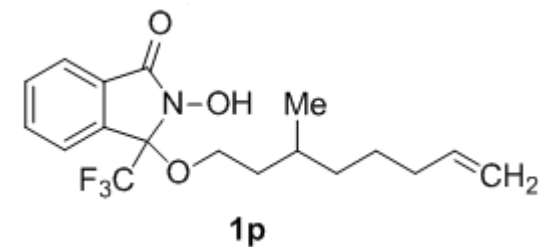

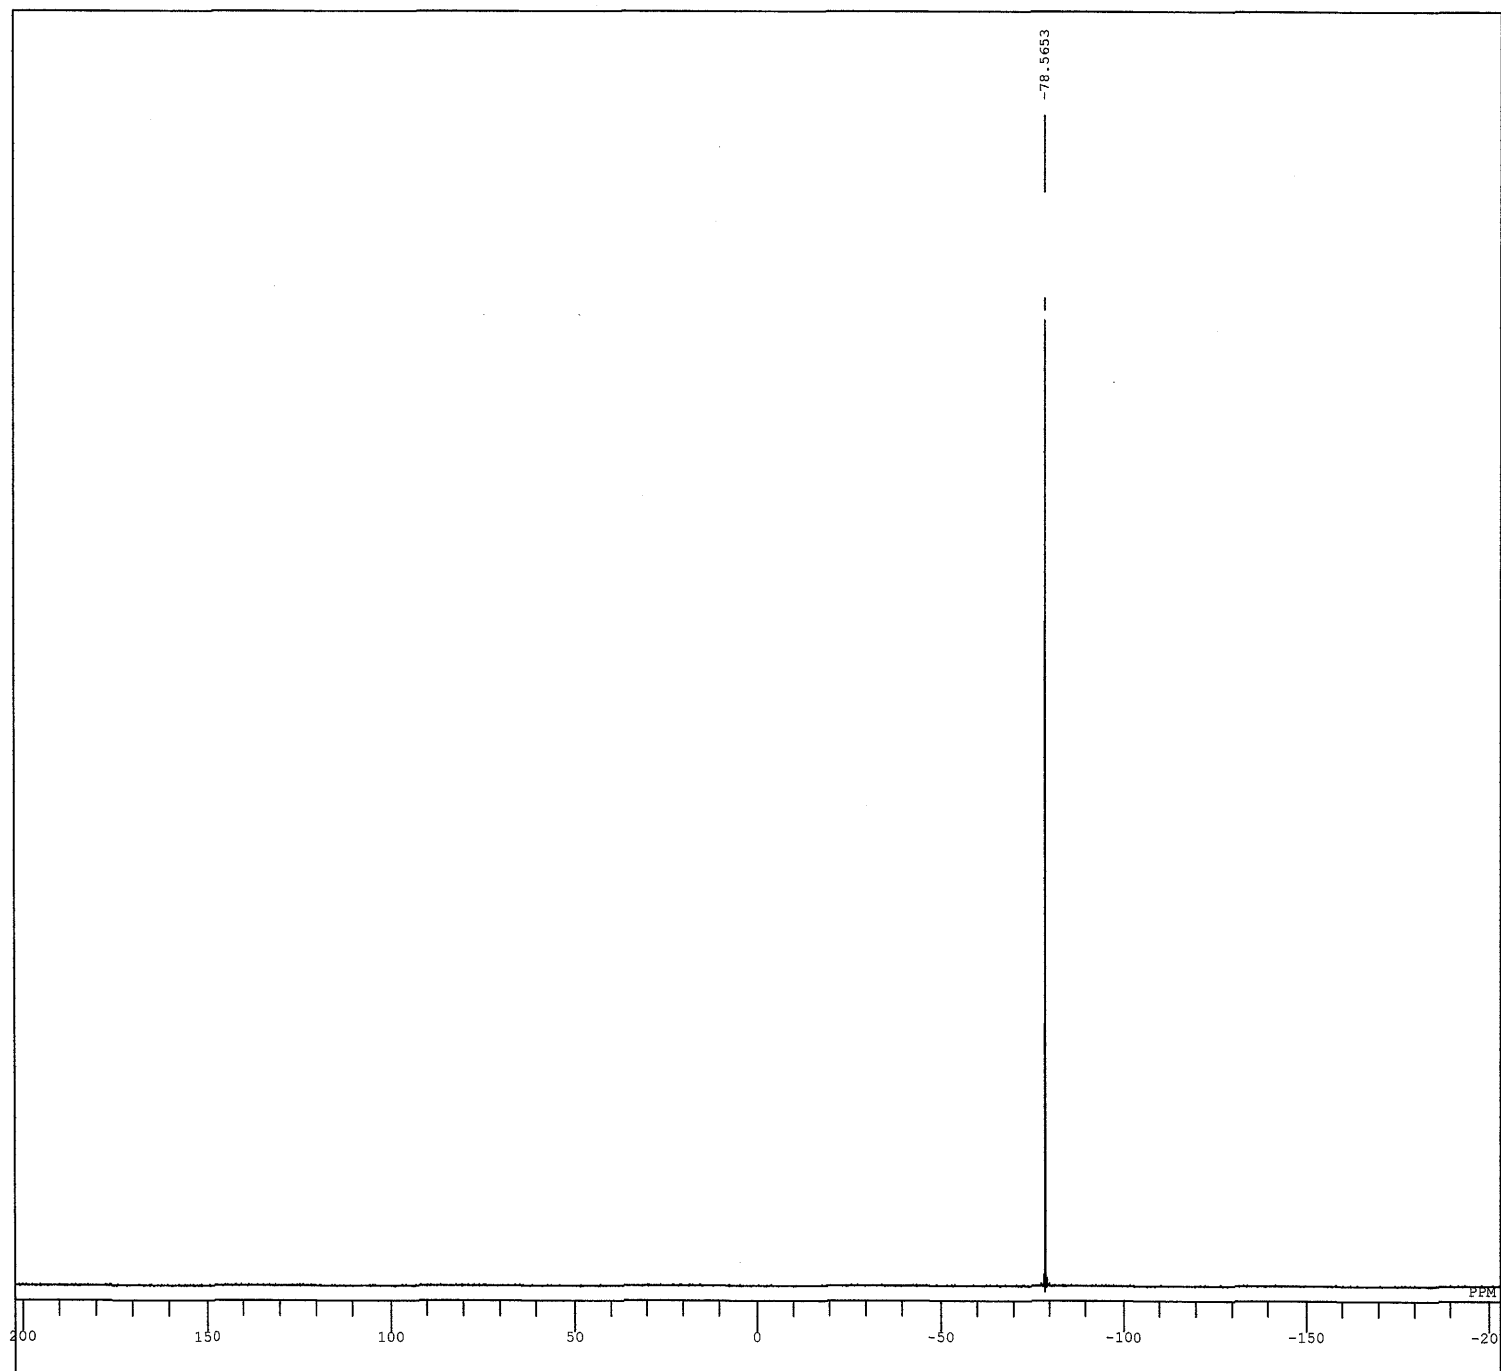

DFILE ozawa06-071\_19F.jdf  
COMNT 3-Me-7-octenol, OH  
DATIM 06-12-2014 09:13:50  
OBNUC 19F  
EXMOD proton.jxp  
OBFREQ 368.64 MHz  
OBSET 7.63 KHz  
OBFIN 2.85 Hz  
POINT 16384  
FREQU 186567.17 Hz  
SCANS 4  
ACQTM 0.0878 sec  
PD 5.0000 sec  
PW1 3.90 usec  
IRNUC 19F  
CTEMP 22.1 c  
SLVNT CDCL3  
EXREF -164.90 ppm  
BF 0.12 Hz  
RGAIN 46

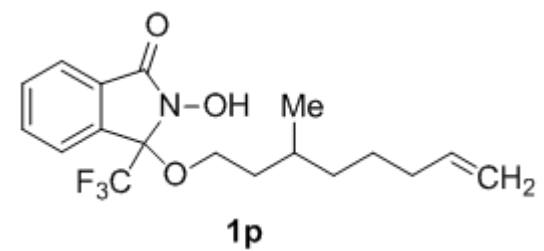



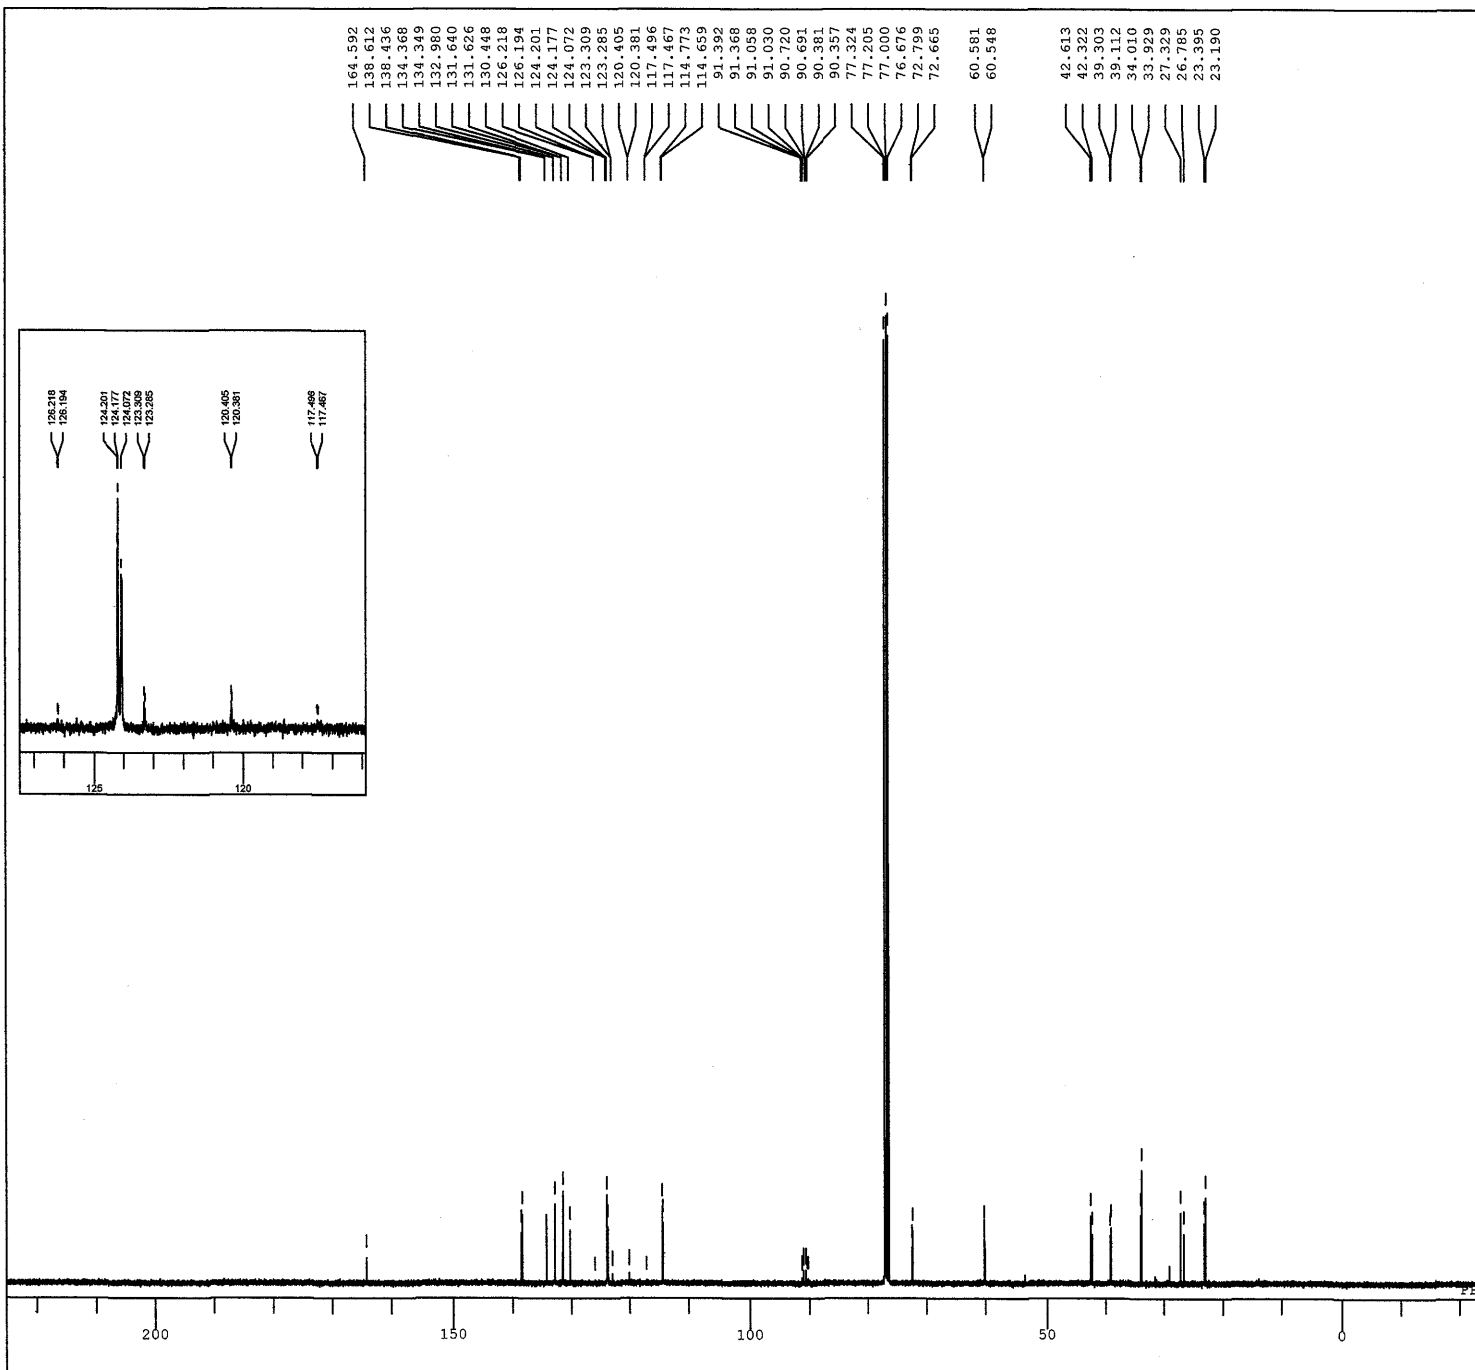

DFILE ozawa060-087\_13C.jdf  
 COMNT 3-Me-7-octenol, [O]  
 DATIM 12-12-2014 19:14:28  
 OBNUC 13C  
 EXMOD carbon.jxp  
 OBFREQ 98.52 MHz  
 OBSSET 4.64 KHz  
 OBFIN 8.74 Hz  
 POINT 65535  
 FREQU 30788.18 Hz  
 SCANS 10400  
 ACQTM 2.1286 sec  
 PD 2.0000 sec  
 FWL 3.07 usec  
 IRNUC 1H  
 CTEMP 22.7 c  
 SILVNT CDCL3  
 EXREF 77.00 ppm  
 BF 0.12 Hz  
 RGAIN 60

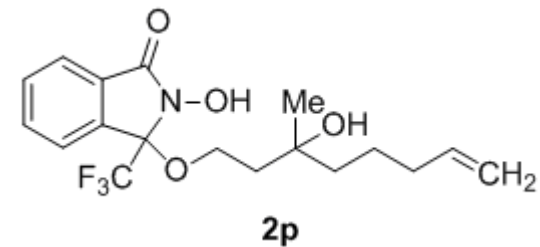



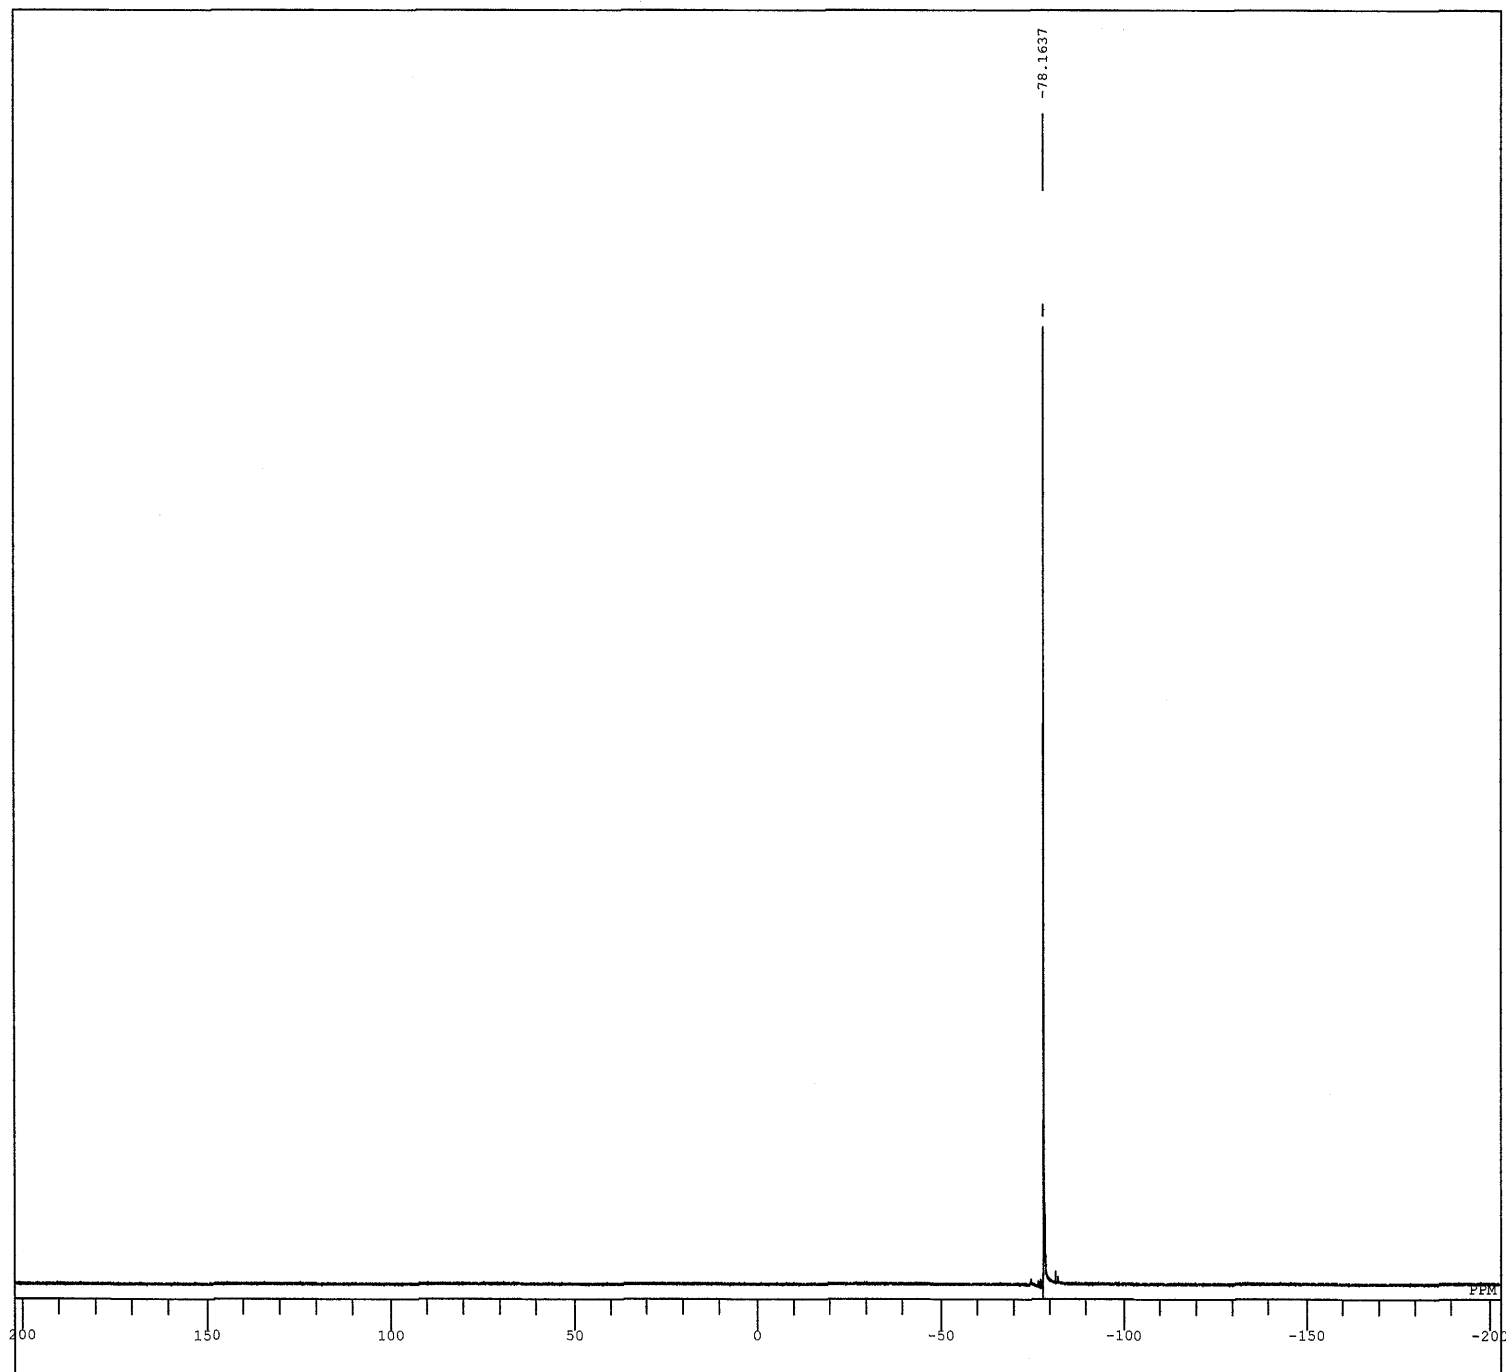

DFILE ozawa06-087\_19F.jdf  
COMNT 3-Me-7-octenol, [O]  
DATIM 09-12-2014 09:04:40  
OBNUC 19F  
EXMOD proton.jxp  
OBFRO 368.64 MHz  
OBSET 7.63 KHz  
OBFIN 2.85 Hz  
POINT 16384  
FREQU 186567.17 Hz  
SCANS 12  
ACQTM 0.0878 sec  
PD 5.0000 sec  
PWL 3.90 usec  
IRNUC 19F  
CTEMP 22.1 c  
SLVNT CDCL3  
EXREF -164.90 ppm  
BF 0.12 Hz  
RGAIN 50

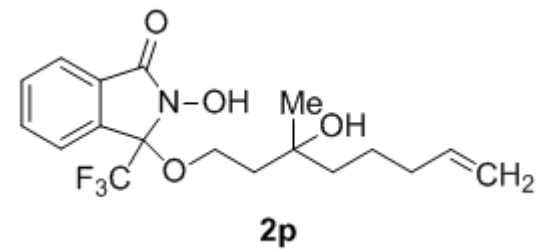

alkyl boronic acid ester, Bn

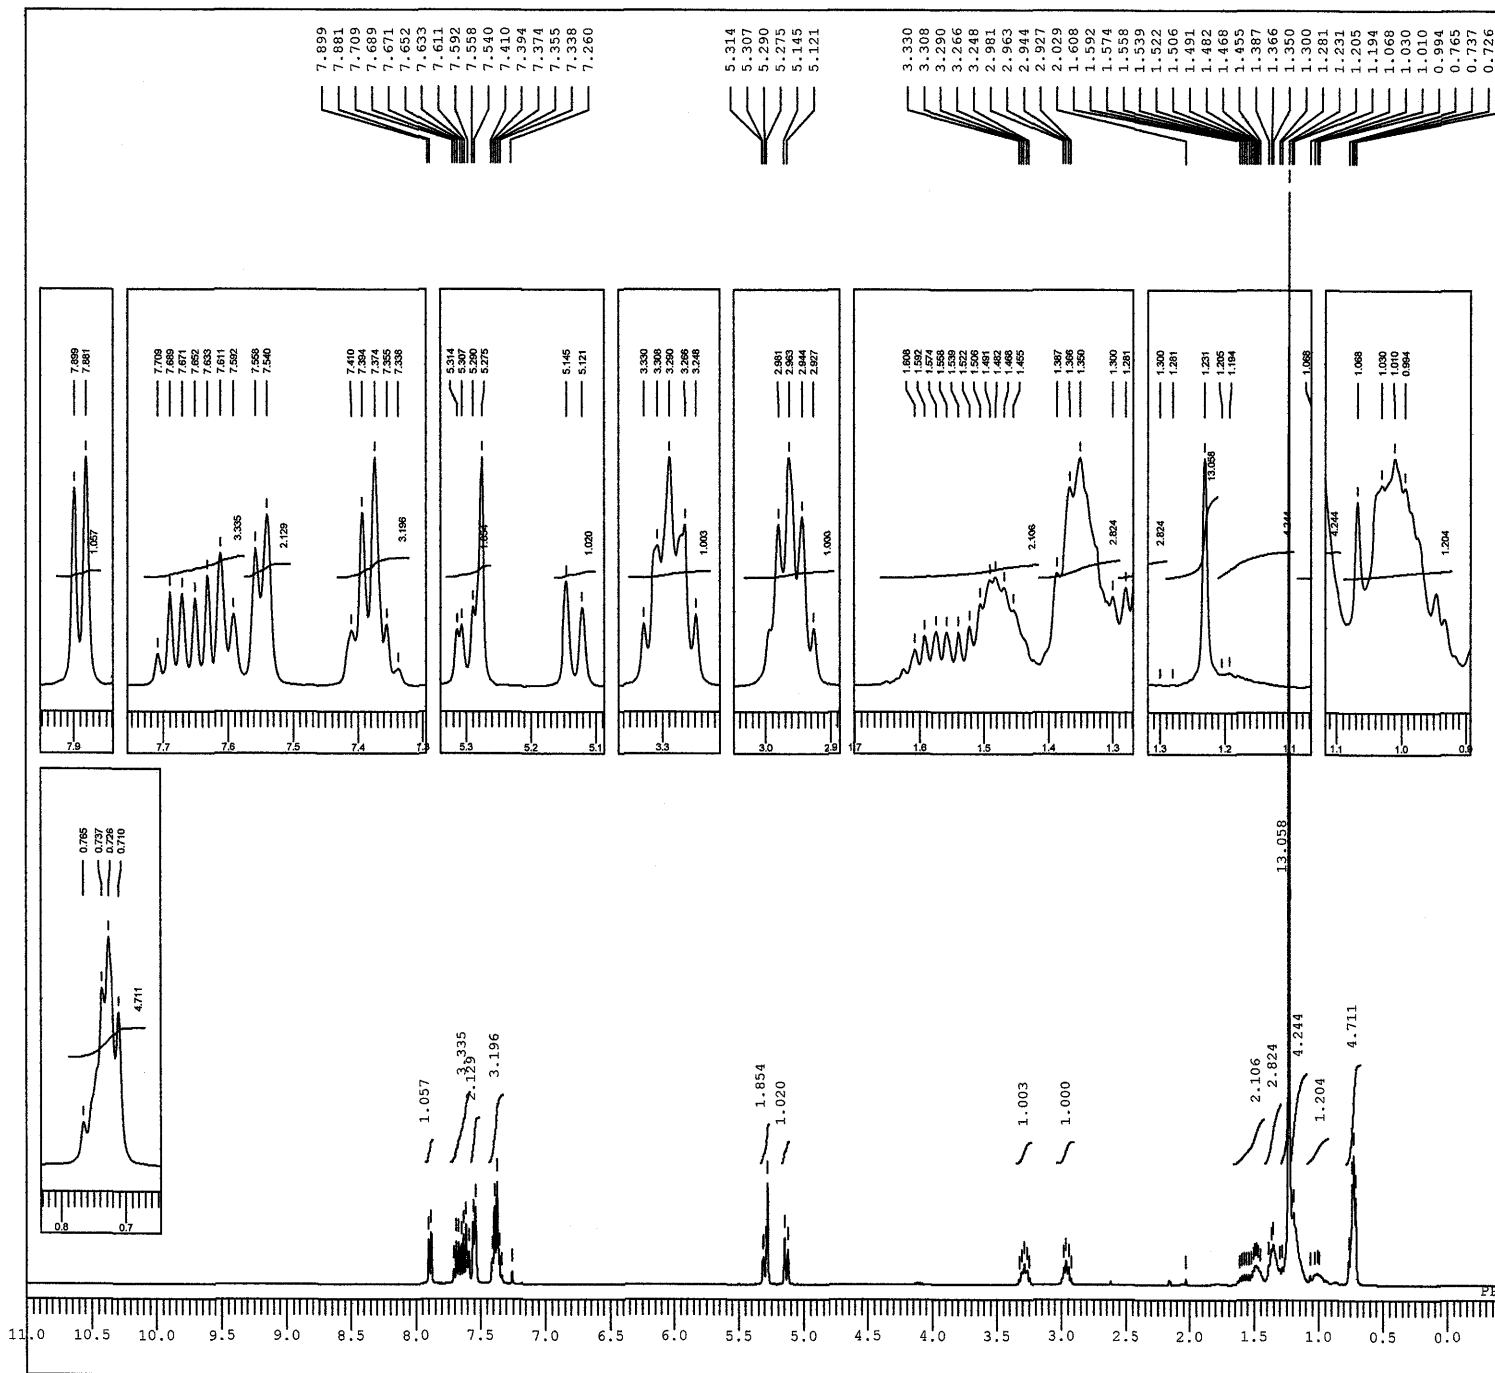

DFILE ozawa06-106 1H.als  
 COMNT alkyl boronic acid ester, Bn  
 DATIM 18-12-2014 12:55:37  
 OBNUC 1H  
 EXMOD proton.jxp  
 OBFRO 391.78 MHz  
 OBSFQ 8.51 KHz  
 OBFIN 3.34 Hz  
 POINT 13107  
 FREQU 5878.90 Hz  
 SCANS 4  
 ACQTM 2.2295 sec  
 PD 5.0000 sec  
 PW1 5.07 usec  
 IRNUC 1H  
 CTEMP 21.8 c  
 SLVNT CDCL3  
 EXREF 7.26 ppm  
 BF 1.00 Hz  
 RGAIN 22

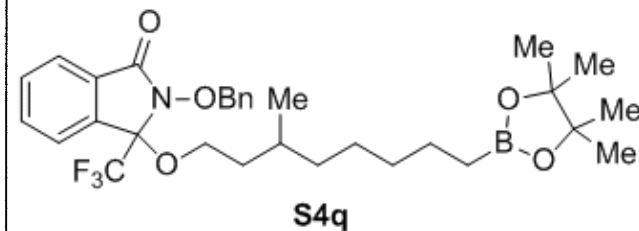

alkyl boronic acid ester, Bn

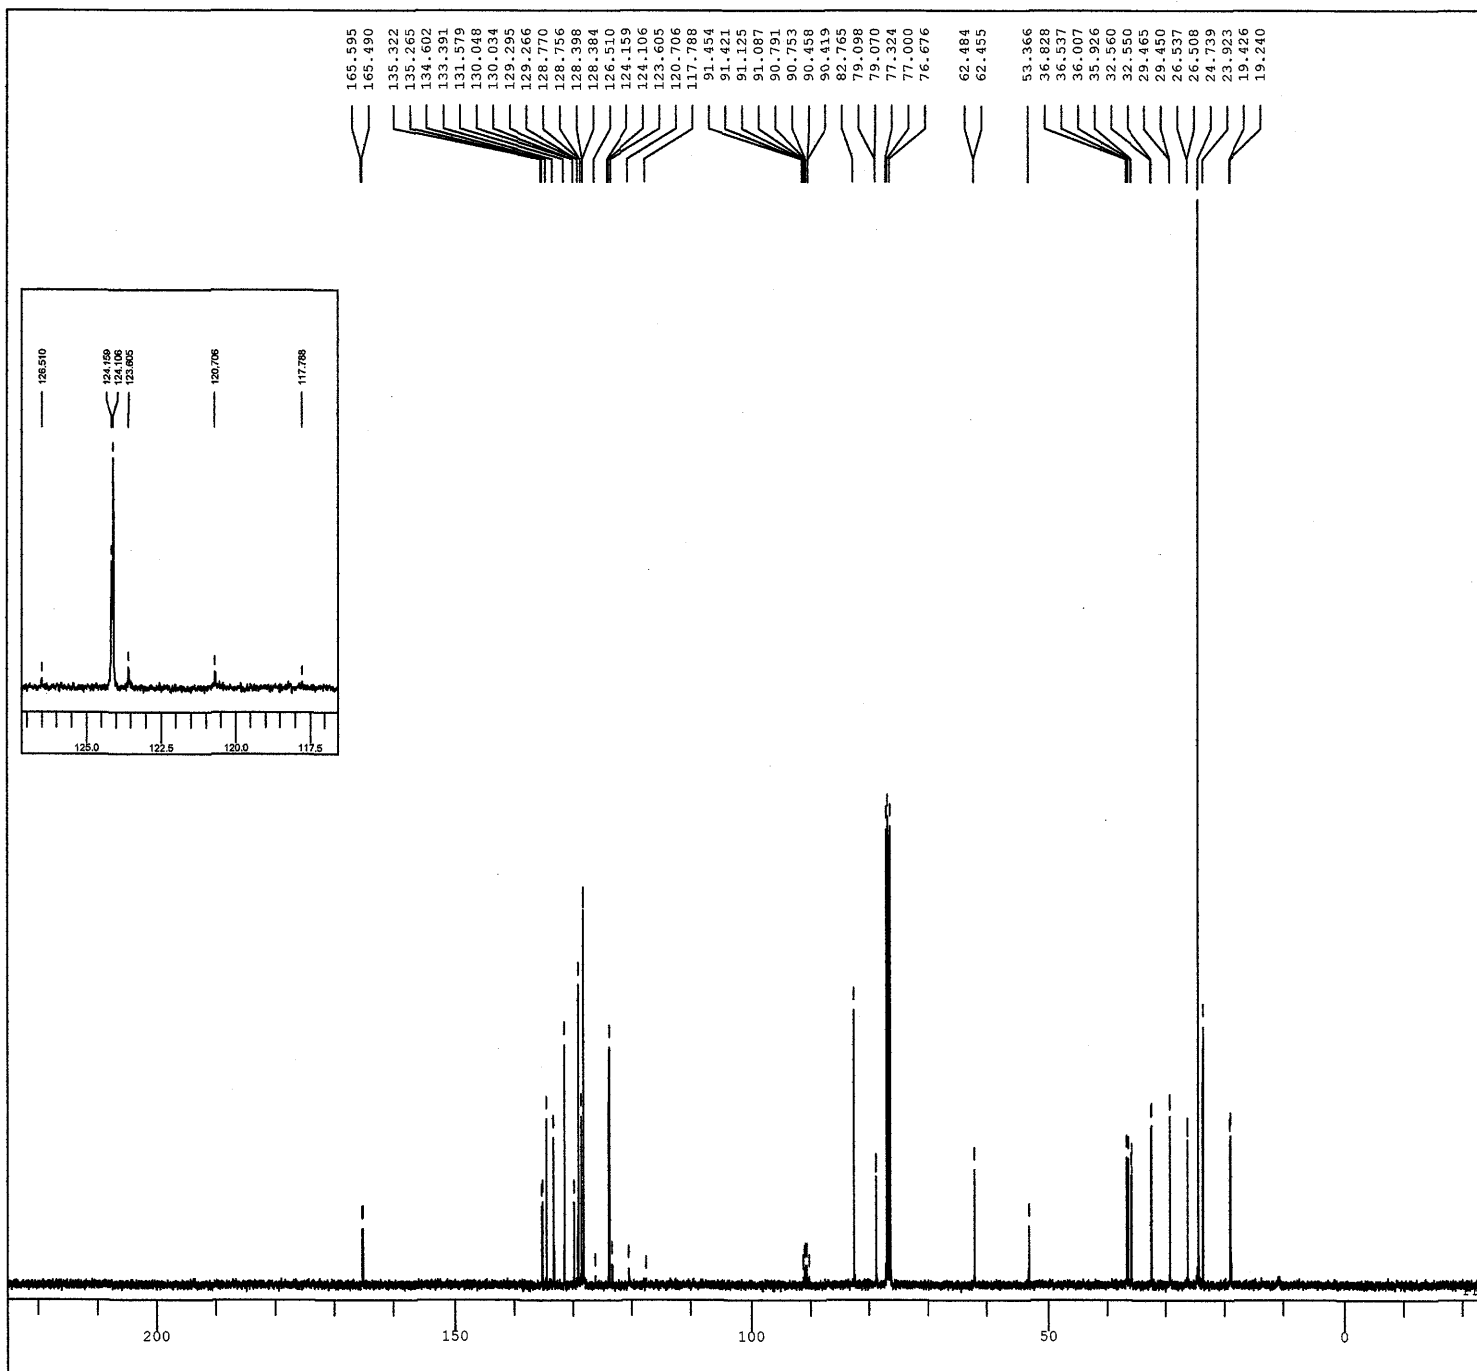

DFILE ozawa06-106 13C.als  
COMNT alkyl boronic acid ester, Bn  
DATIM 18-12-2014 12:56:45  
OBNUC 13C  
EXMOD carbon.jxp  
OBFRO 98.52 MHz  
OBSFT 4.64 KHz  
OBFIN 8.74 Hz  
POINT 52428  
FREQU 24630.54 Hz  
SCANS 200  
ACQTM 2.1286 sec  
PD 2.0000 sec  
PW1 3.07 usec  
IRNUC 1H  
CTEMP 22.1 c  
SLVNT CDCL3  
EXREF 77.00 ppm  
BF 1.00 Hz  
RGAIN 60

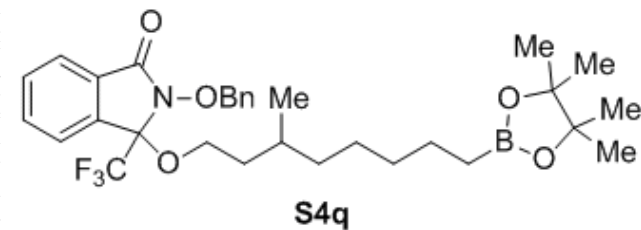

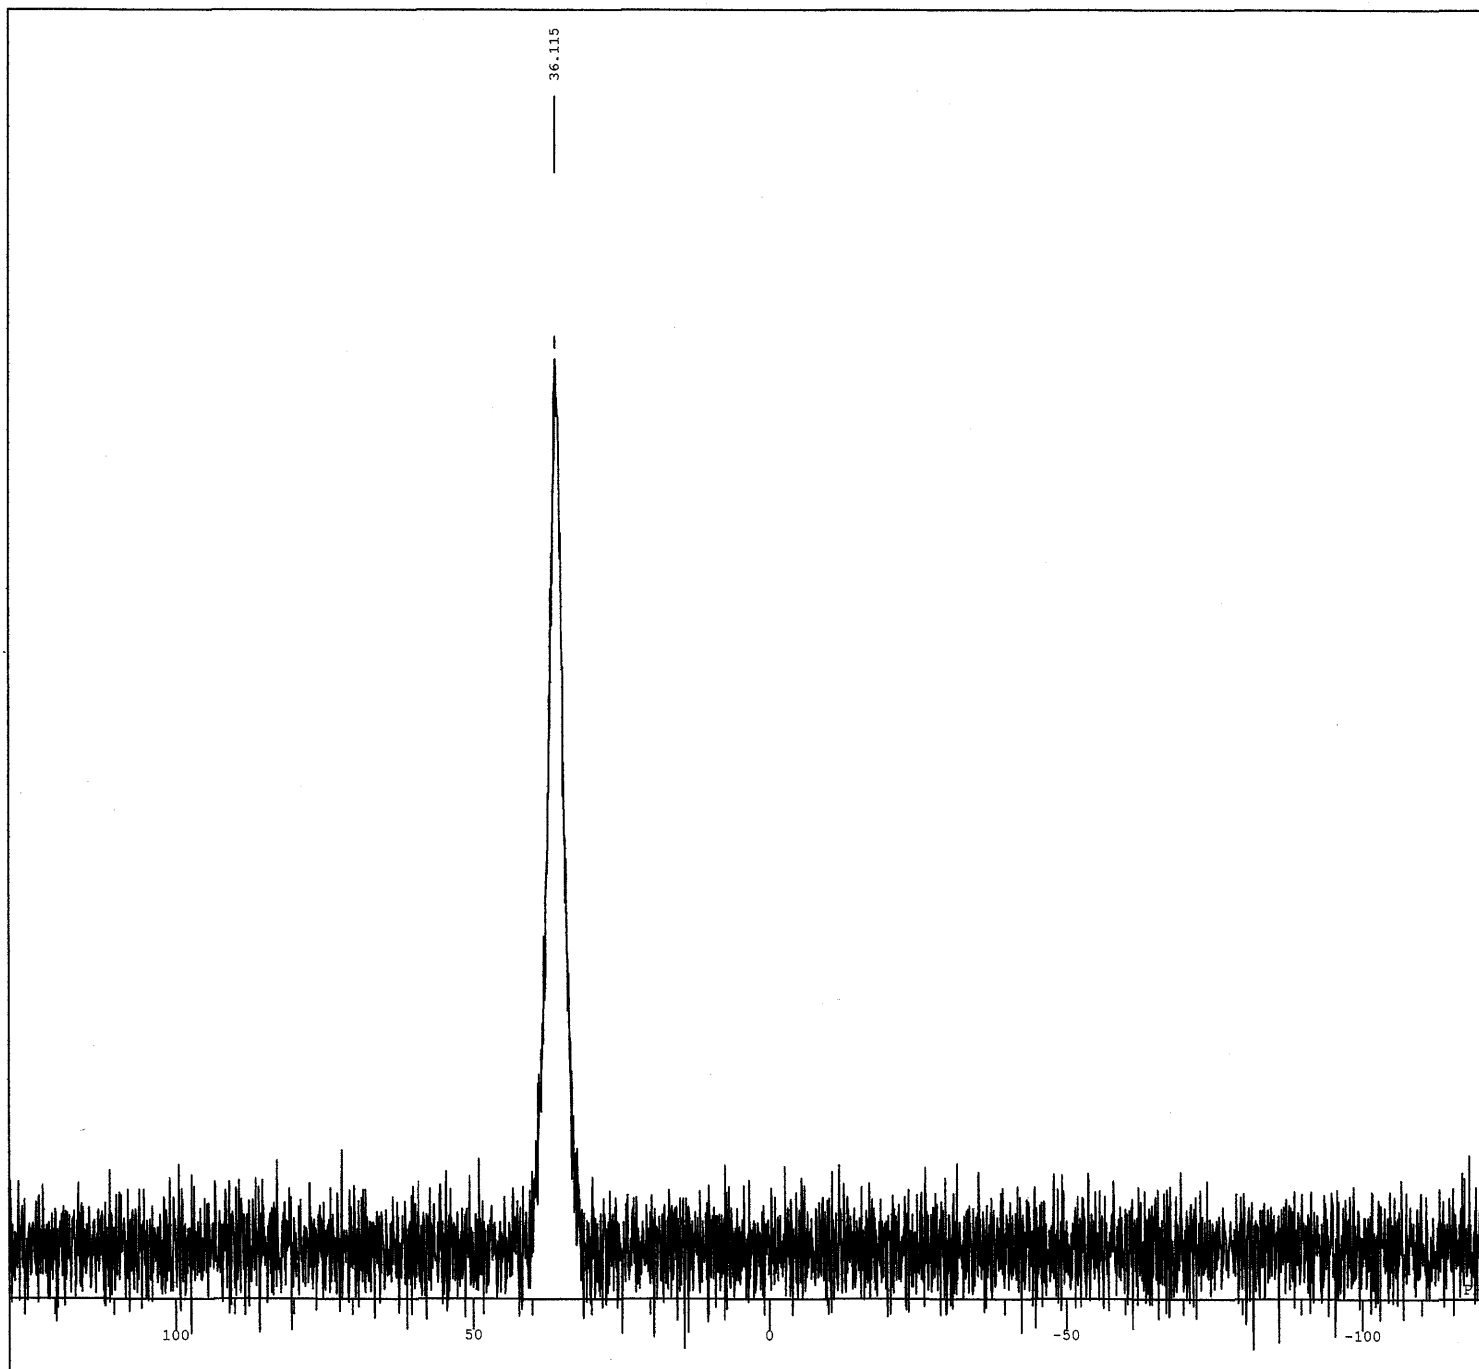

DFILE ozawa06-106\_11B.jdf  
COMNT alkyl-Bpin, Bn  
DATIM 30-12-2014 09:58:14  
OBNUC 11B  
EXMOD carbon.jxp  
CBFRQ 125.70 MHz  
CBSST 0.81 KHz  
CBFIN 3.25 Hz  
POINT 4095  
FREQU 39308.18 Hz  
SCANS 1000  
ACQTM 0.1042 sec  
PD 80.0000 sec  
PWL 3.98 usec  
IRNUC 1H  
CTEMP 21.8 c  
SLVNT CDCL3  
EXREF 31.00 ppm  
BF 0.12 Hz  
RGAIN 60

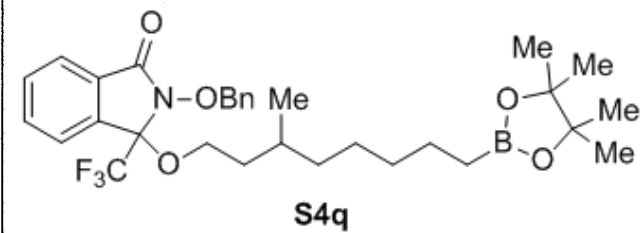





alkyl boronic acid ester, OH

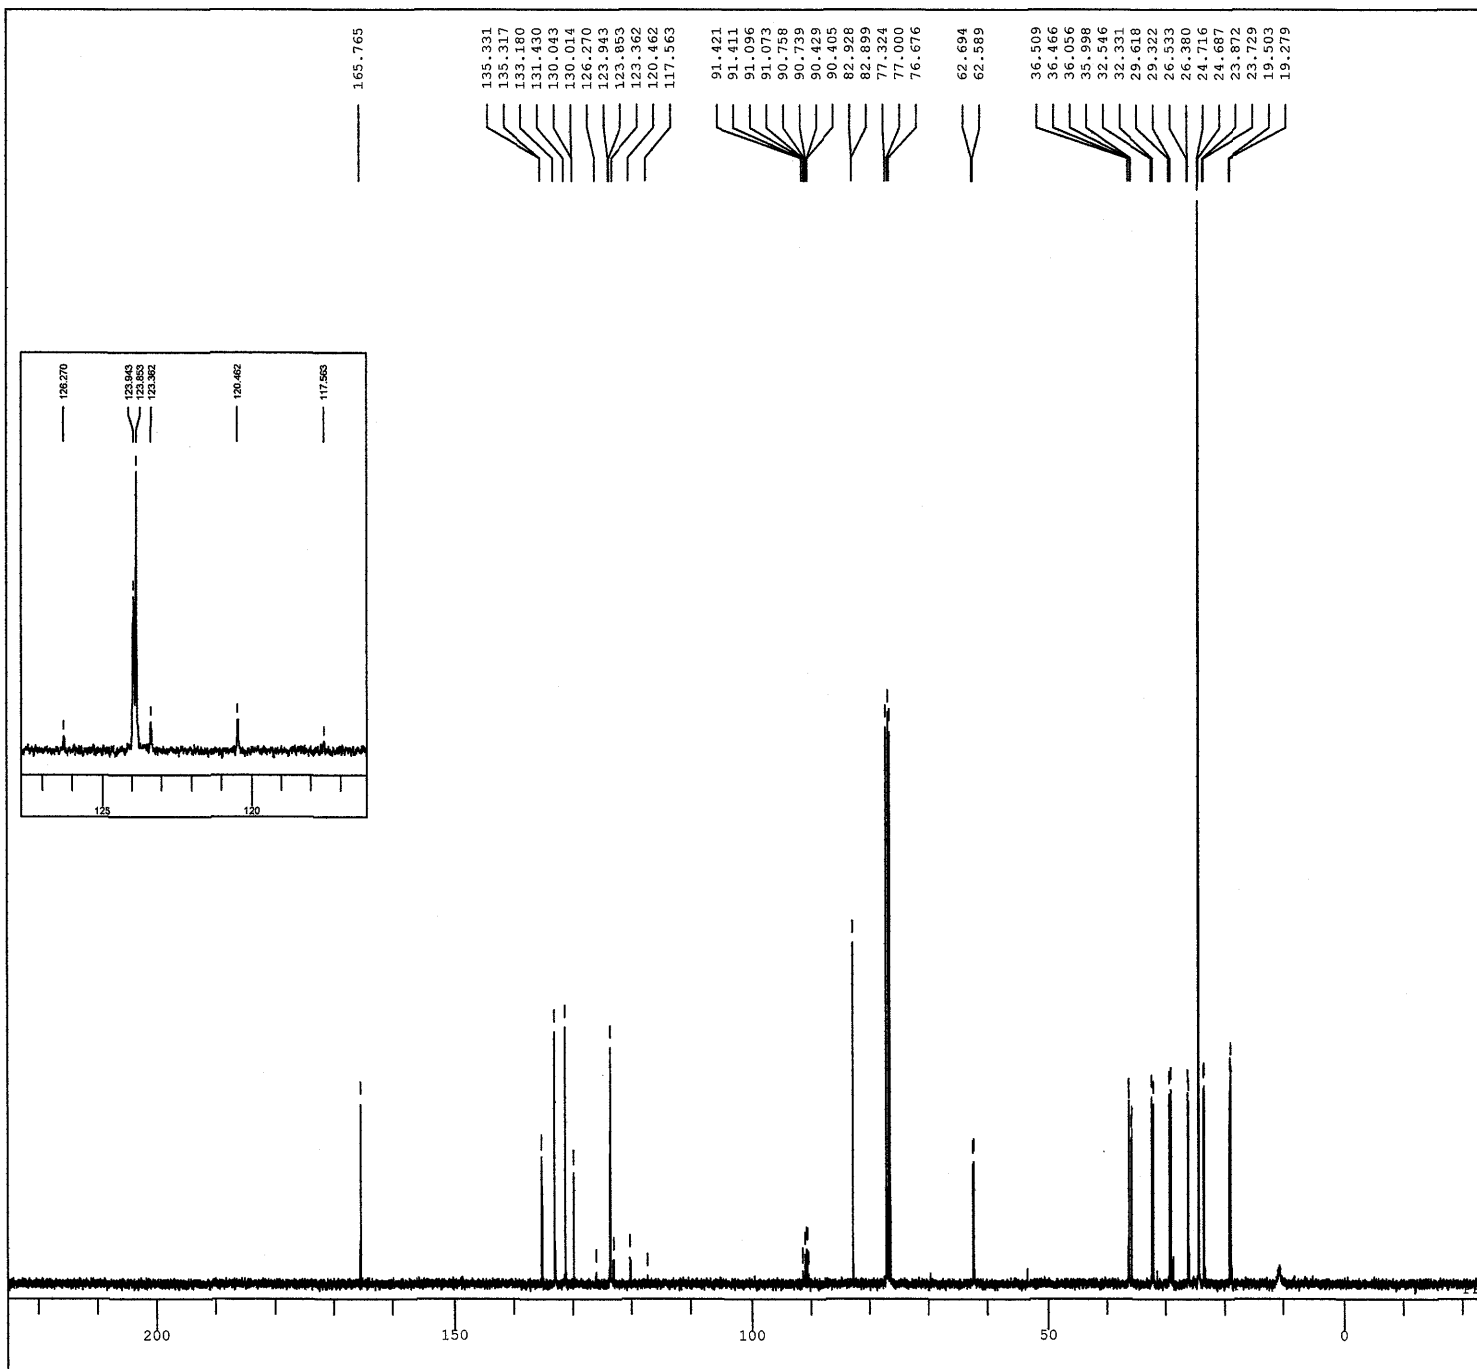

DFILE ozawa06-107\_13C.jdf  
COMNT alkyl boronic acid ester, OH  
DATIM 22-12-2014 17:07:37  
OBNUC 13C  
EXMOD carbon.jxp  
OBFREQ 98.52 MHz  
OBSETE 4.64 KHz  
OBFIN 8.74 Hz  
POINT 65535  
FREQU 30788.18 Hz  
SCANS 264  
ACQTM 2.1286 sec  
PD 2.0000 sec  
PW1 3.07 usec  
IRNUC 1H  
CTEMP 22.4 c  
SLVNT CDCL3  
EXREF 77.00 ppm  
BF 1.00 Hz  
RGAIN 58

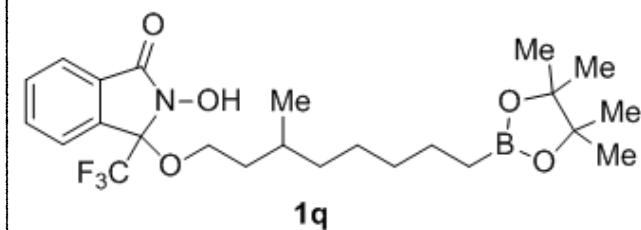

alkyl boronic acid ester, OH

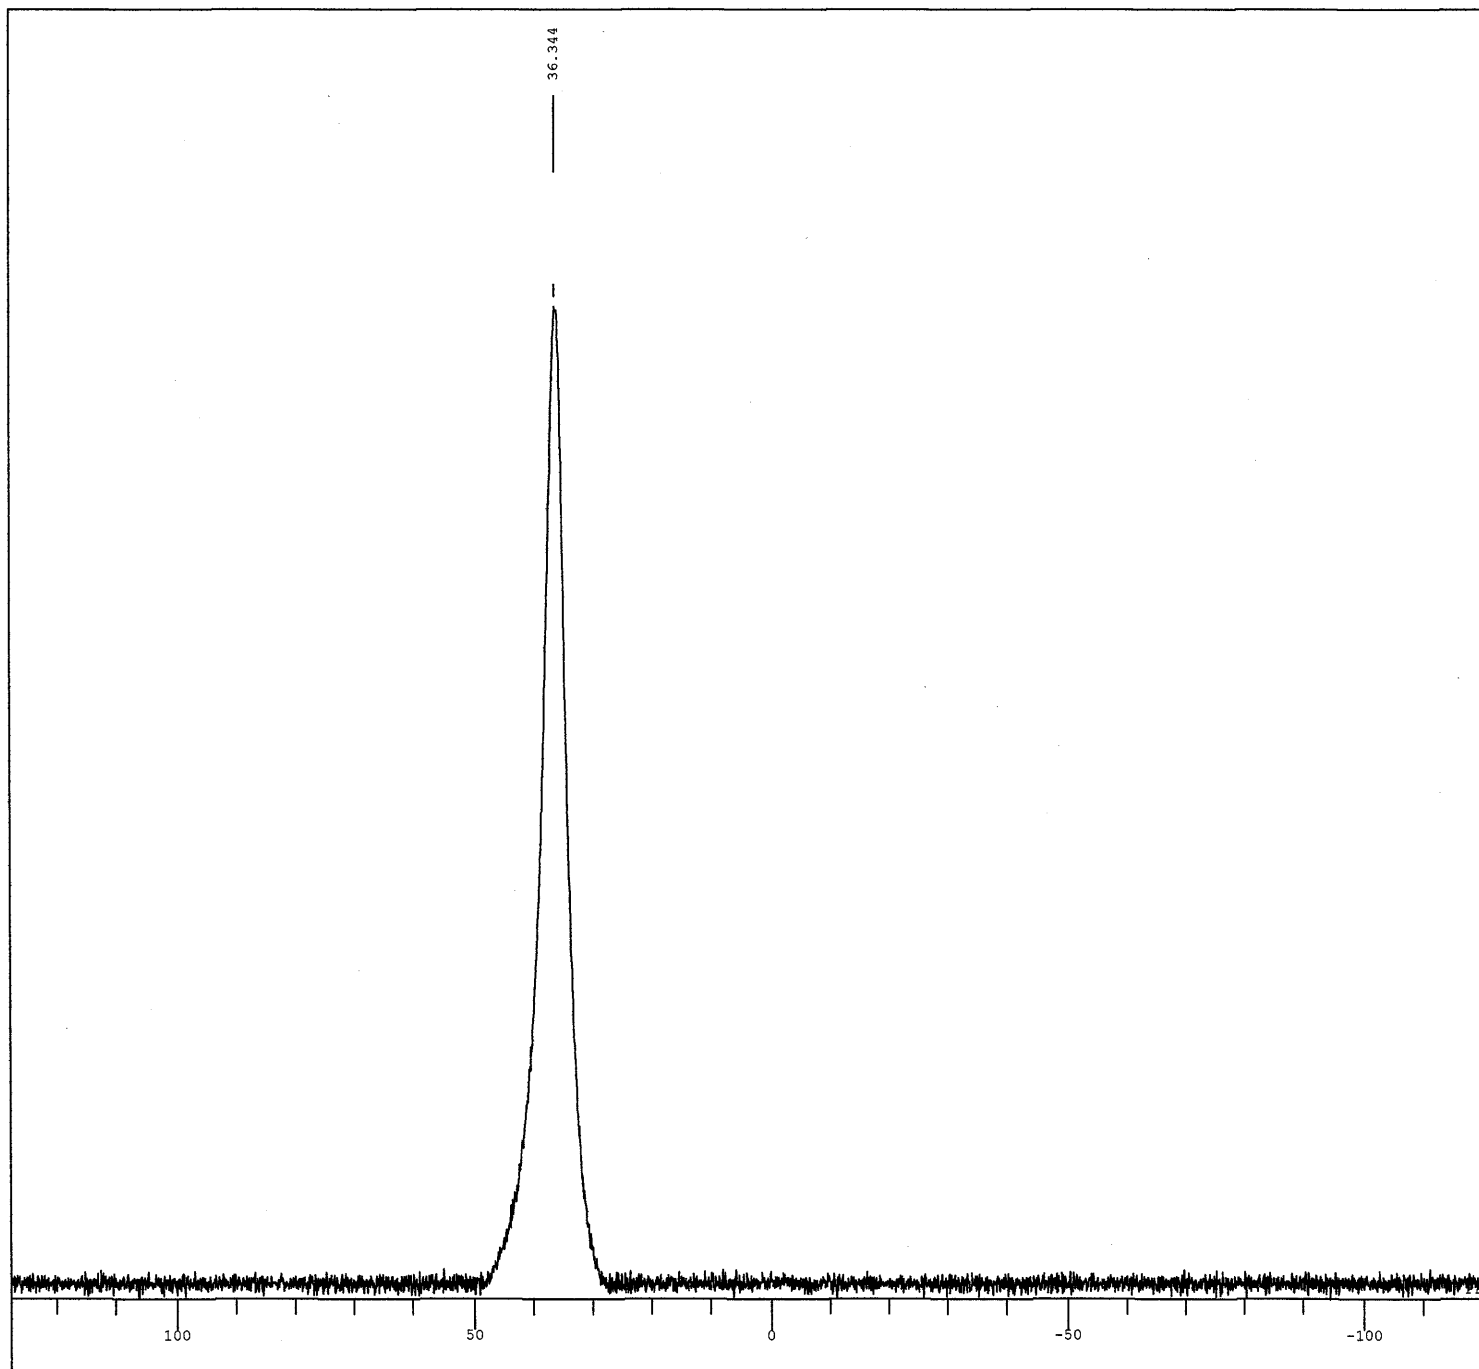

DFILE ozawa06-107 11B.jdf  
COMNT alkyl boronic acid ester, OH  
DATIM 22-12-2014 17:01:53  
OBNUC 11B  
EXMOD carbon.jxp  
OBFRO 125.70 MHz  
OBSFT 0.81 KHz  
OBFIN 3.25 Hz  
POINT 4095  
FREQU 39308.18 Hz  
SCANS 500  
ACQTM 0.1042 sec  
PD 80.0000 sec  
PW1 3.98 usec  
IRNUC 1H  
CTEMP 22.1 c  
SLVNT CDCL3  
EXREF 31.00 ppm  
BF 0.12 Hz  
RGAIN 44

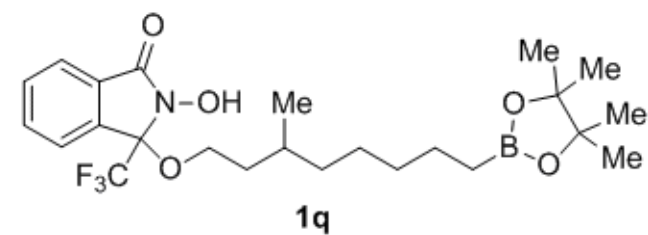



alkyl boronic acid ester, OH

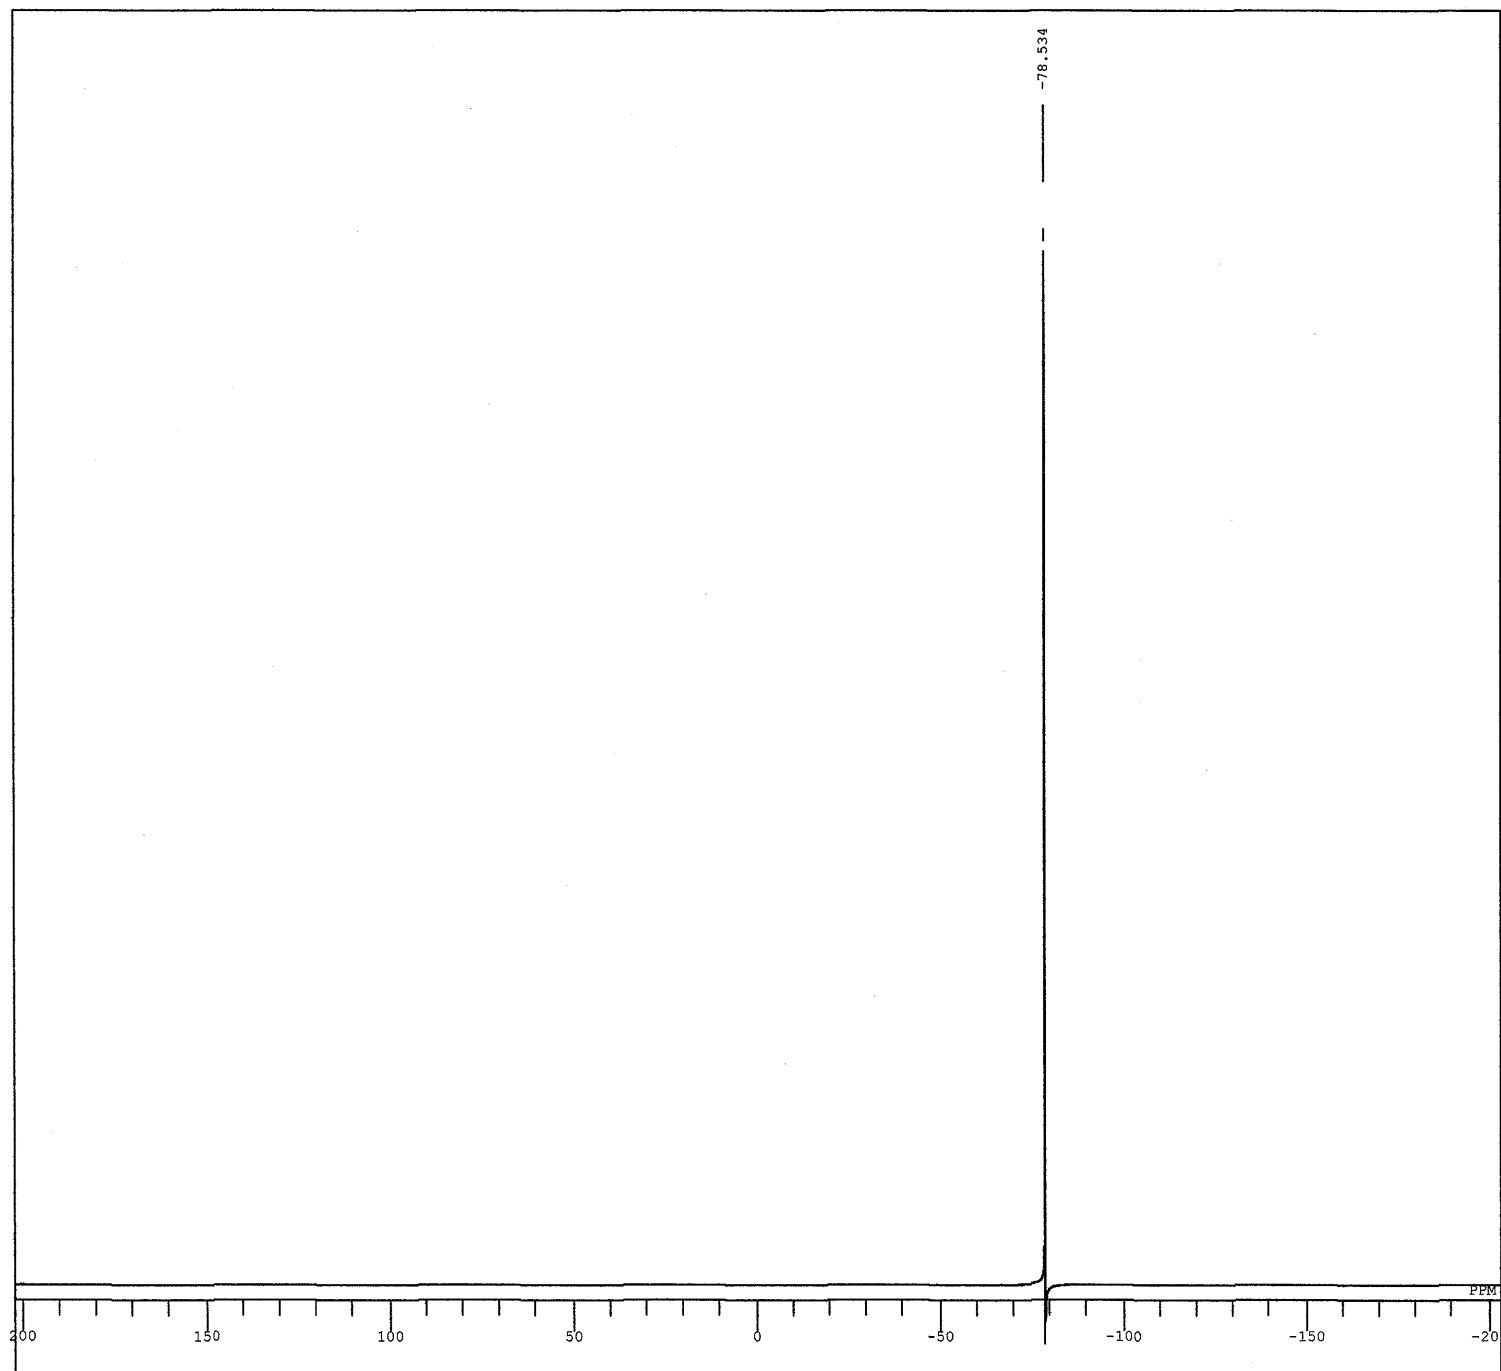

DFILE ozawa06-107 19F.jdf  
COMNT alkyl boronic acid ester, OH  
DATIM 22-12-2014 16:57:41  
OBNUC 19F  
EXMOD proton.jxp  
OBFREQ 368.64 MHz  
OBSET 7.63 KHz  
OBFIN 2.85 Hz  
POINT 16384  
FREQU 186567.17 Hz  
SCANS 8  
ACQTM 0.0878 sec  
PD 5.0000 sec  
PWL 3.90 usec  
IRNUC 19F  
CTEMP 22.1 c  
SLVNT CDCL3  
EXREF -164.90 ppm  
BF 0.12 Hz  
RGAIN 46

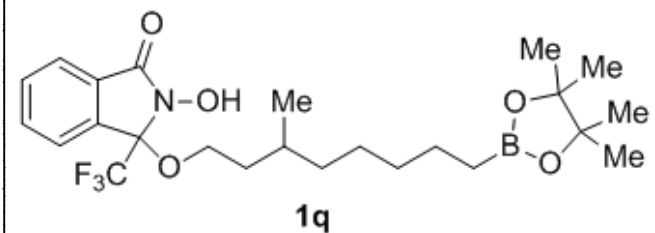



alkyl Bpin, [O]

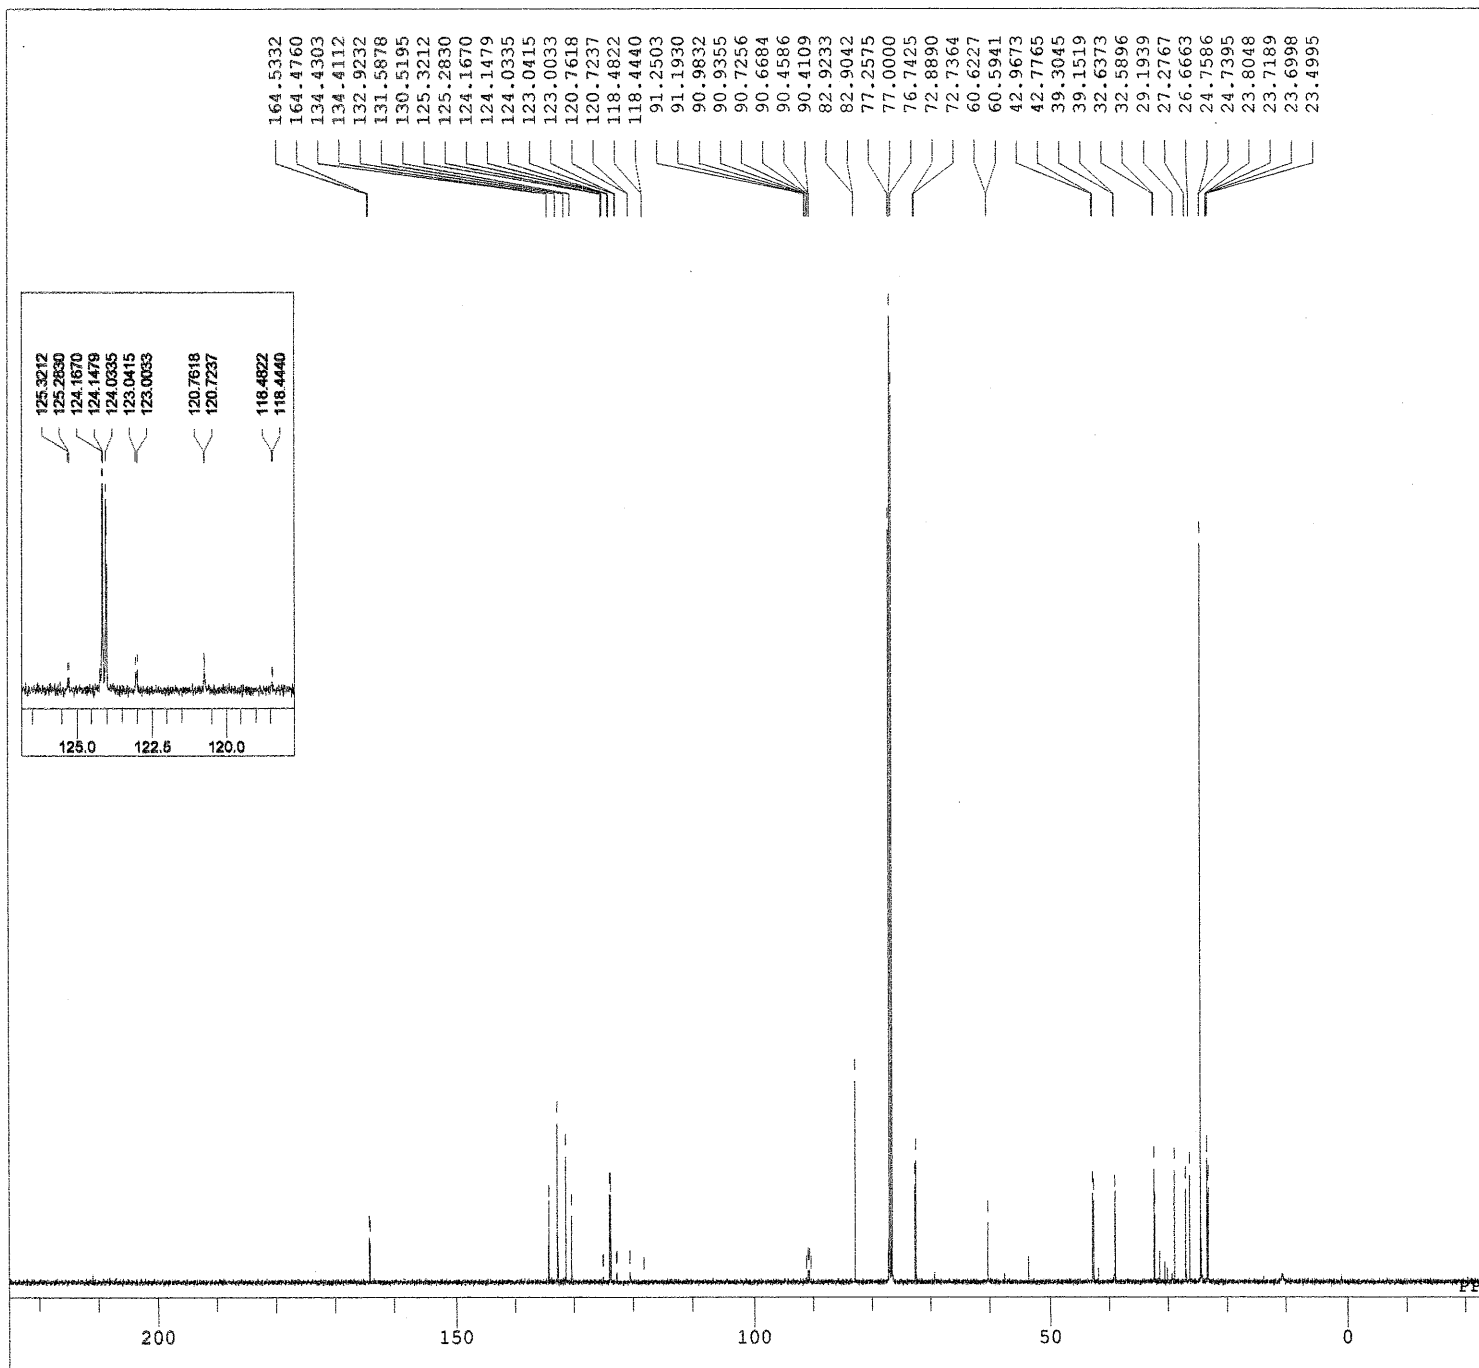

DFILE ozawa06-115\_13C.jdf  
COMNT alkyl Bpin, [O]  
DATIM 2014-12-28 07:52:44  
OBNUC 13C  
EXMOD carbon.jxp  
OBFRO 125.77 MHz  
OBSE 7.87 KHz  
OBFIN 4.21 Hz  
POINT 32767  
FREQU 39308.18 Hz  
SCANS 5120  
ACQTM 0.8336 sec  
PD 2.0000 sec  
PWL 3.40 usec  
IRNUC 1H  
CTEMP 24.5 c  
SLVNT CDCL3  
EXREF 77.00 ppm  
BF 0.12 Hz  
RGAIN 60

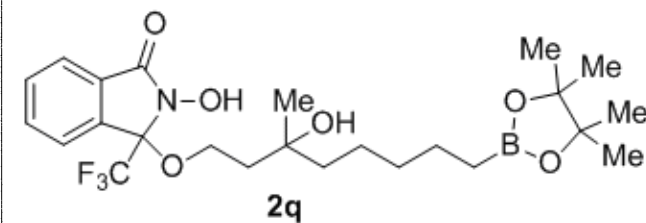

alkyl-Bpin, [0]

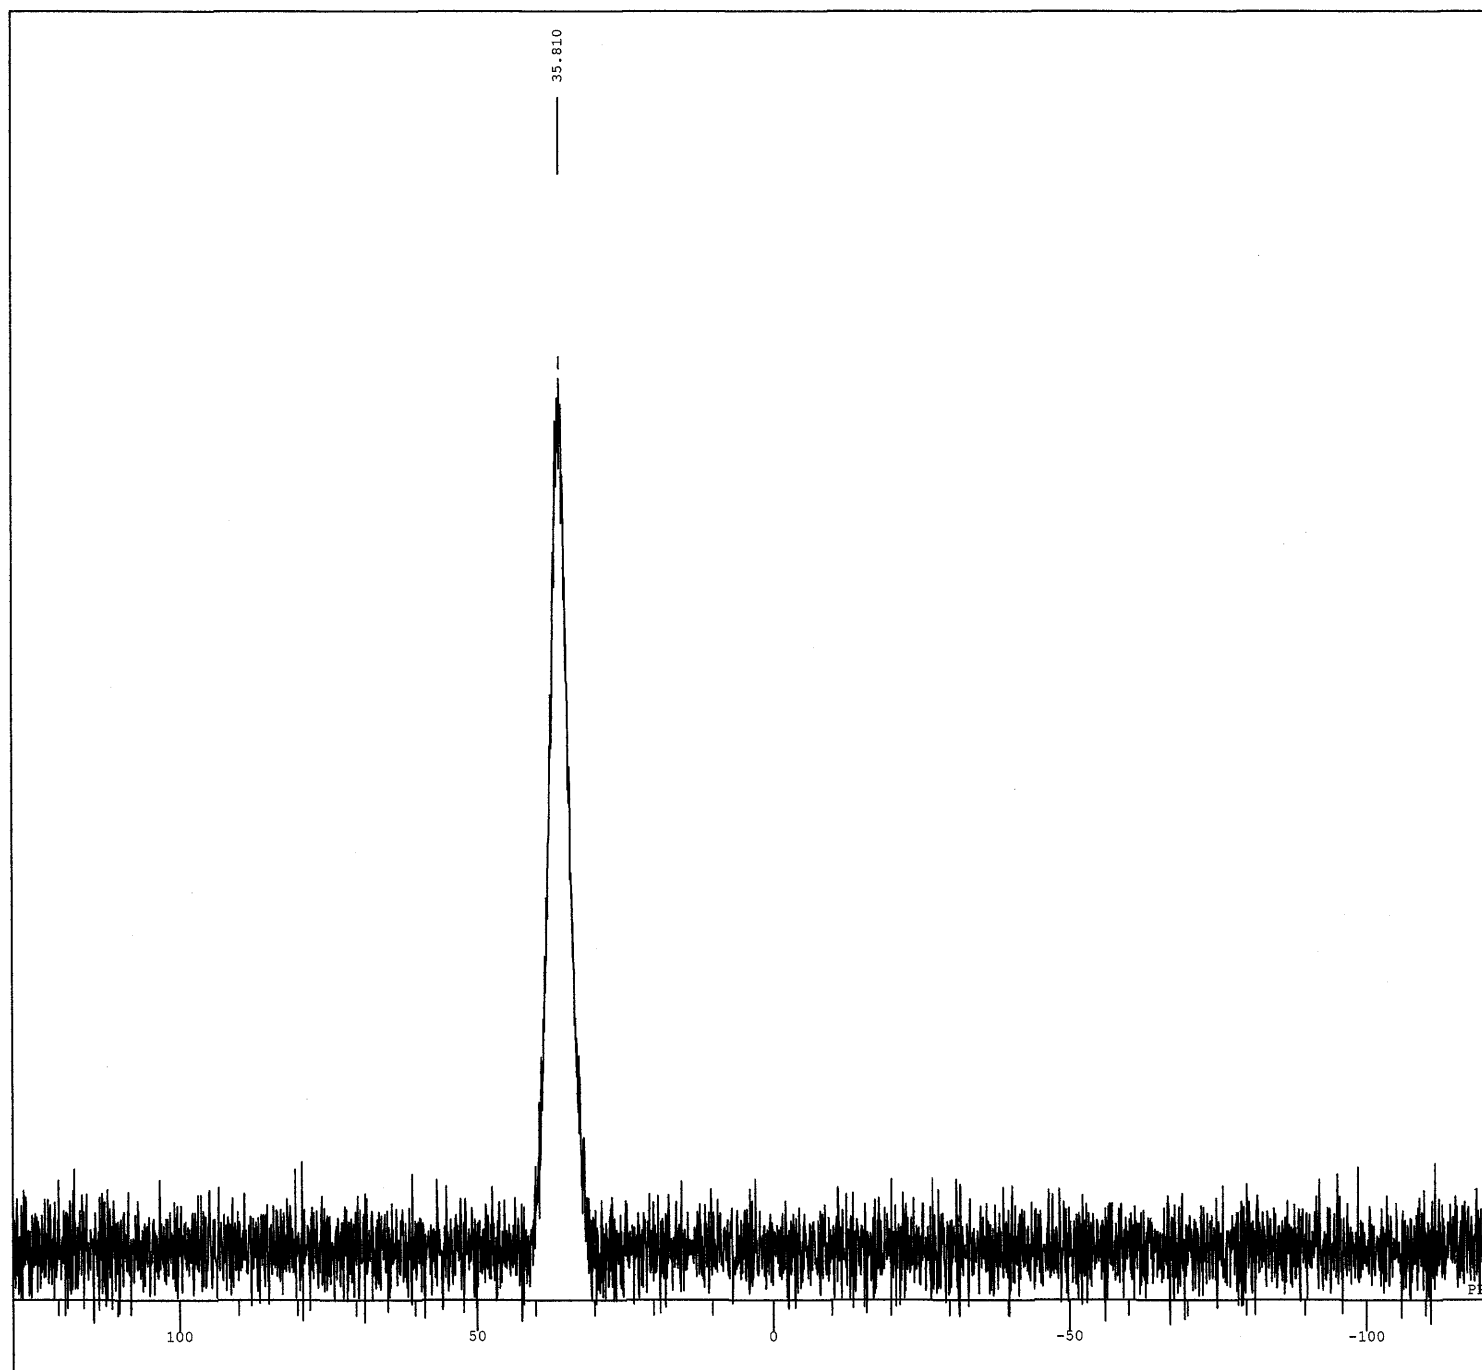

DFILE ozawa06-115\_11B.jdf  
COMNT alkyl-Bpin, [0]  
DATIM 30-12-2014 10:03:48  
OBNUC 11B  
EXMOD carbon.jxp  
OBFREQ 125.70 MHz  
OBSETE 0.81 KHz  
OBFIN 3.25 Hz  
POINT 4095  
FREQU 39308.18 Hz  
SCANS 500  
ACQTM 0.1042 sec  
PD 80.0000 sec  
PW1 3.98 usec  
IRNUC 1H  
CTEMP 21.7 c  
SLVNT CDCL3  
EXREF 31.00 ppm  
BF 0.12 Hz  
RGAIN 60

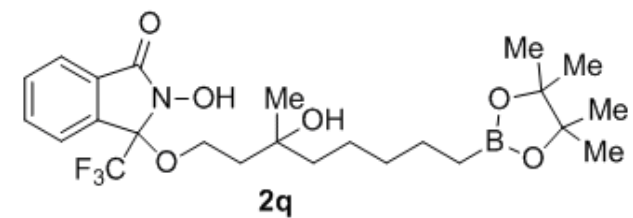

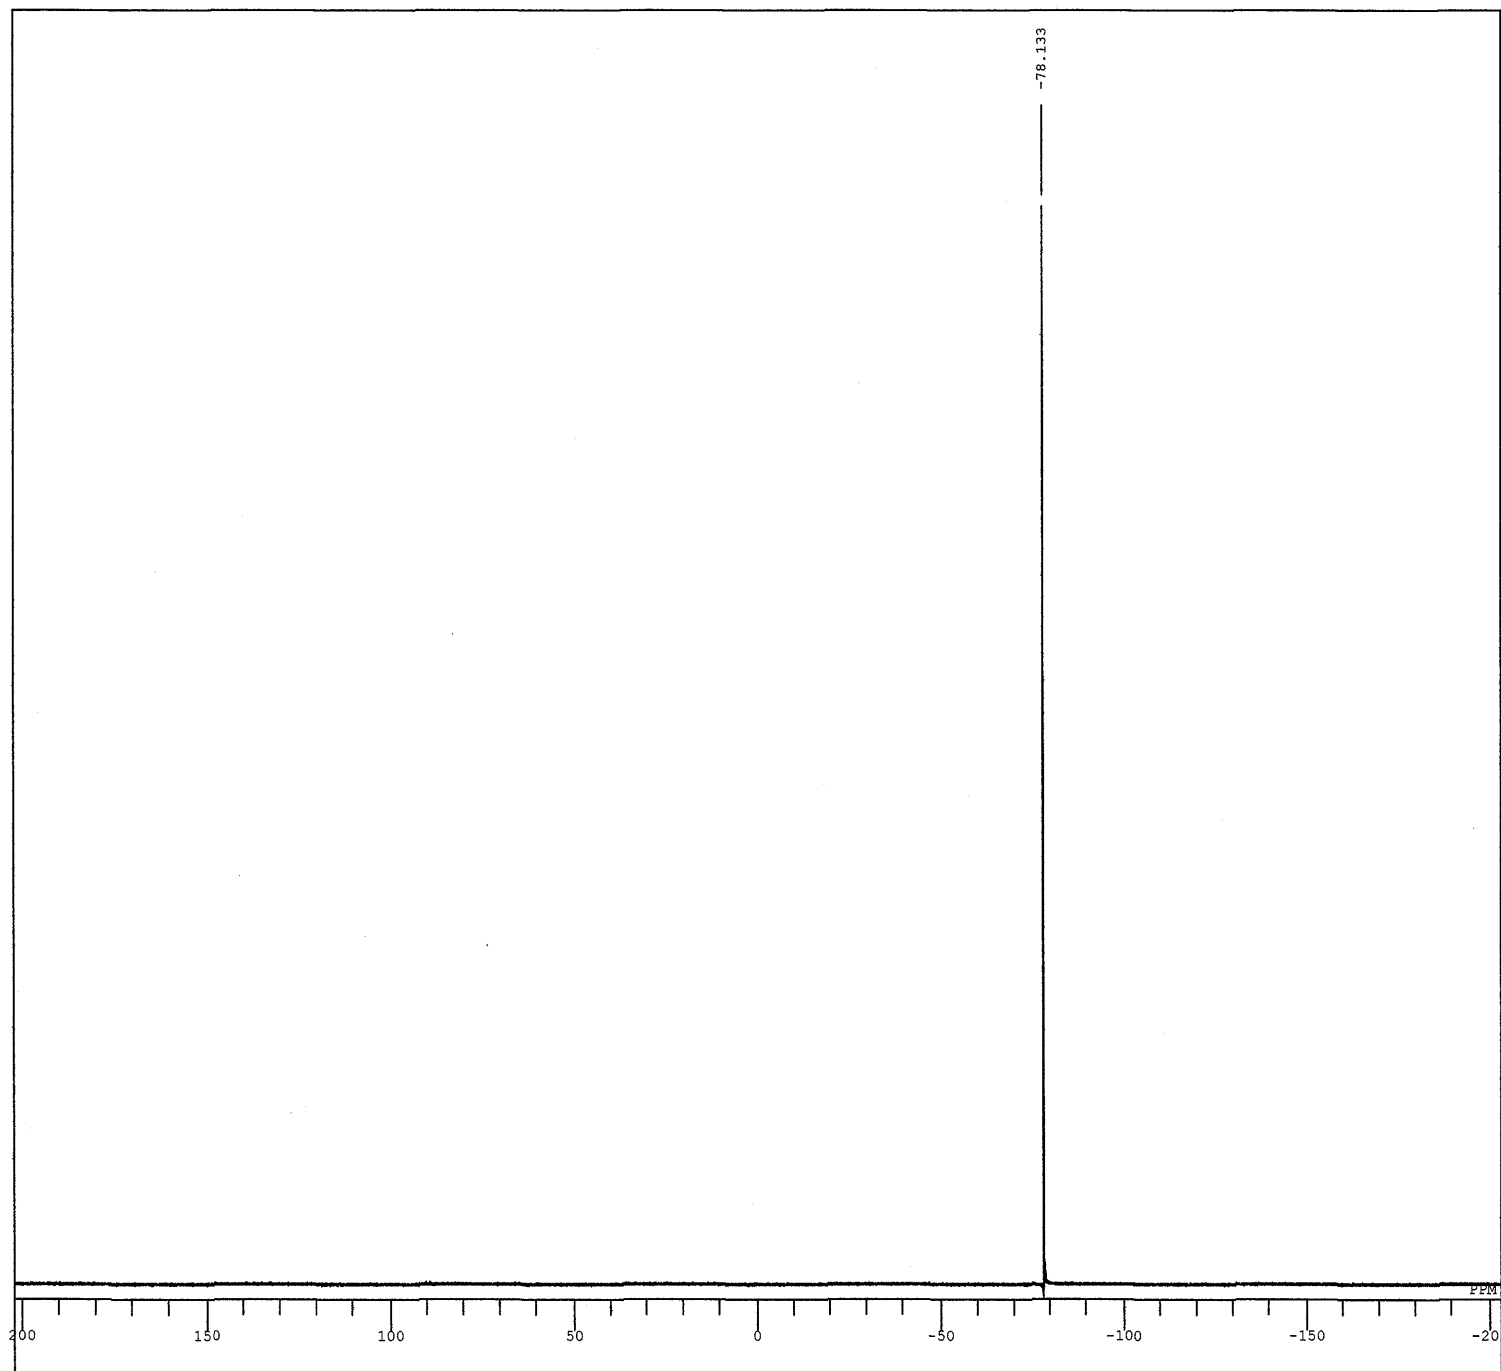

DFILE ozawa06-115 19F.jdf  
COMNT alkyl-Bpin, [O]  
DATIM 30-12-2014 10:09:12  
OBNUC 19F  
EXMOD proton.jxp  
OBFQ 368.64 MHz  
OBSE 7.63 KHz  
OBFIN 2.85 Hz  
POINT 16384  
FREQ 186567.17 Hz  
SCANS 8  
ACQTM 0.0878 sec  
PD 5.0000 sec  
PW1 3.90 usec  
IRNUC 19F  
CTEMP 21.5 c  
SLVNT CDCL3  
EXREF -164.90 ppm  
BF 0.12 Hz  
RGAIN 50

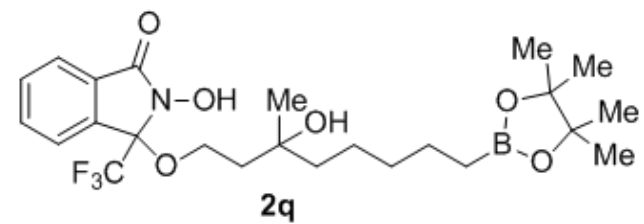

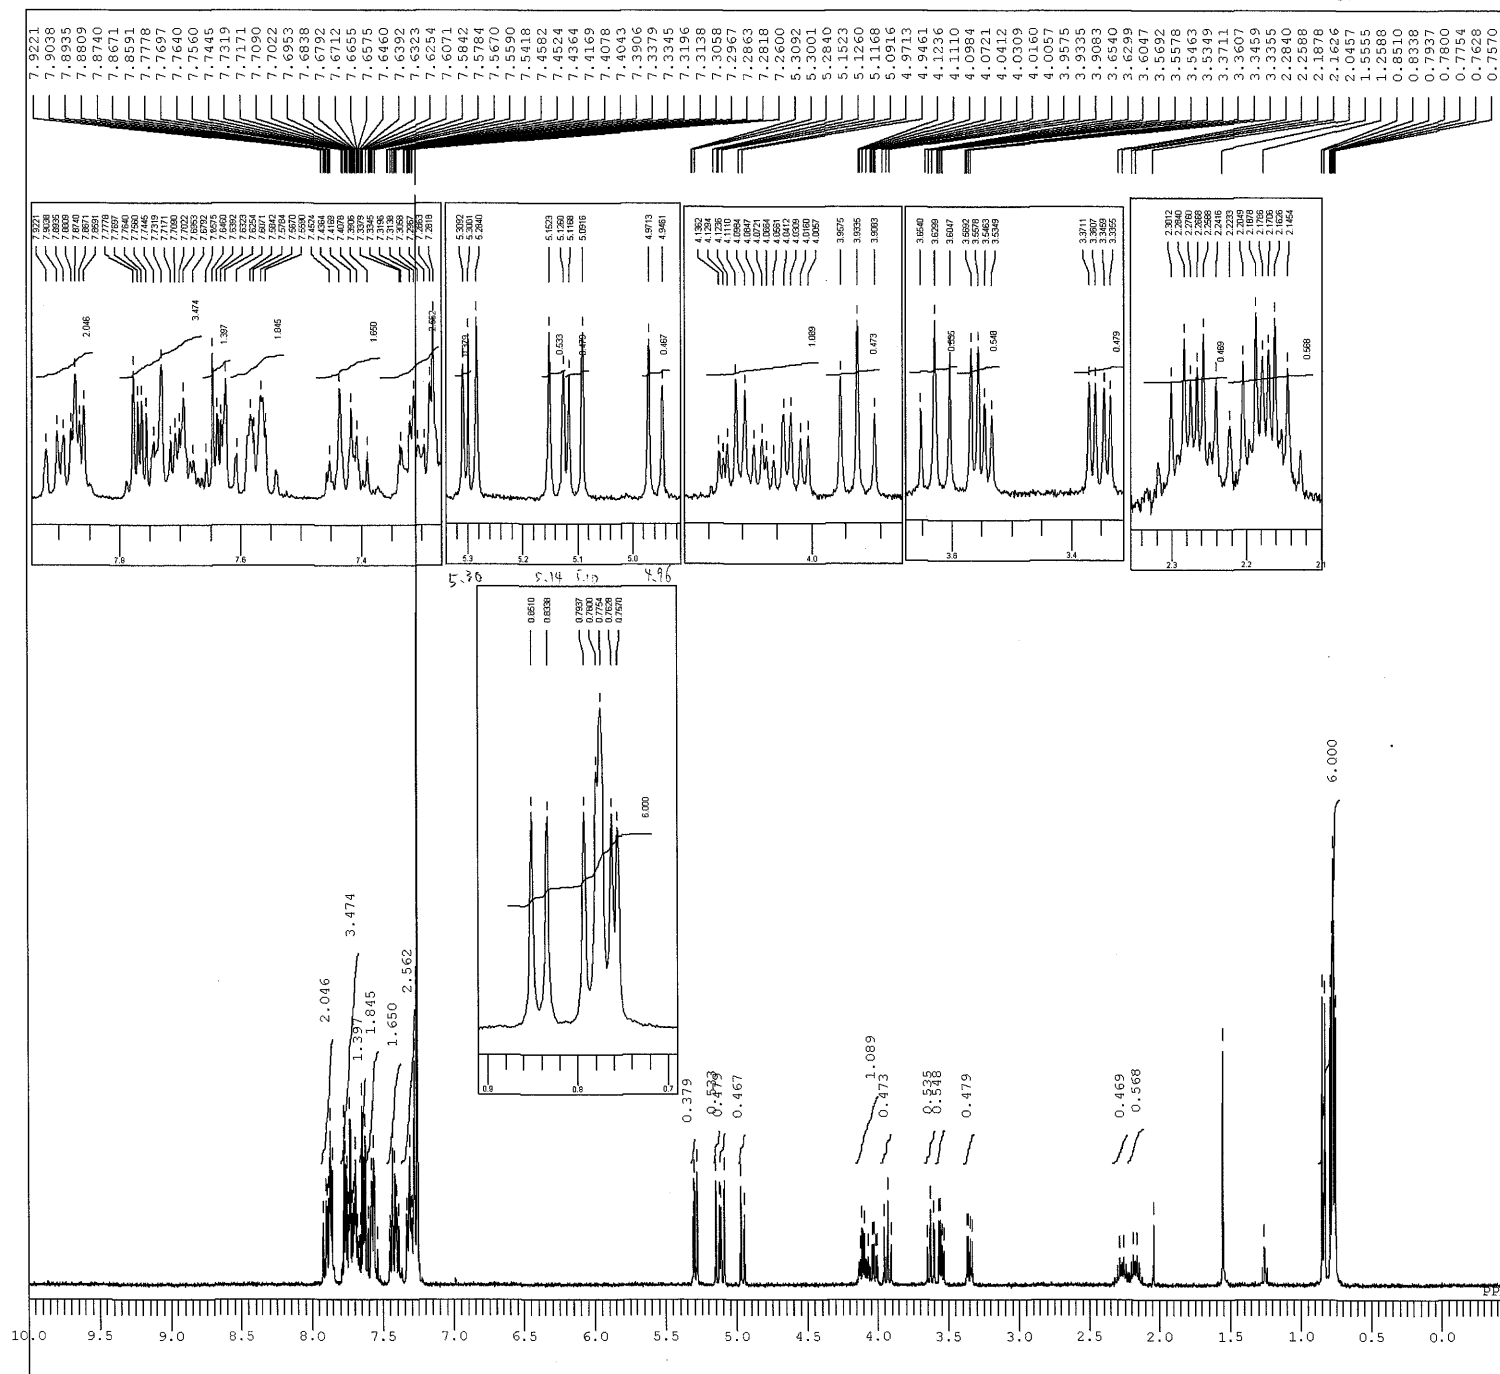

```

DFILE  ozawa04-060.jdf
COMNT  D-valinol-N-phth
DATIM  02-12-2013 21:20:35
OBNUC  1H
EXMOD  proton.jxp
OBFRQ  391.78 MHz
OBSET  8.51 KHz
OBFIN  3.34 Hz
POINT  16384
FREQU  7352.94 Hz
SCANS  4
ACQTM  2.2282 sec
PD      5.0000 sec
PW1     5.25 usec
IRNUC  1H
CTEMP  21.4 c
SLVNT  CDCL3
EXREF  7.26 ppm
BF      0.12 Hz
RGAIN  48
    
```

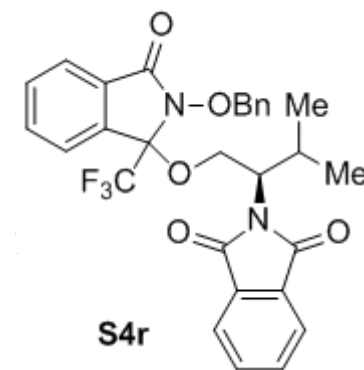

valinol, Bn

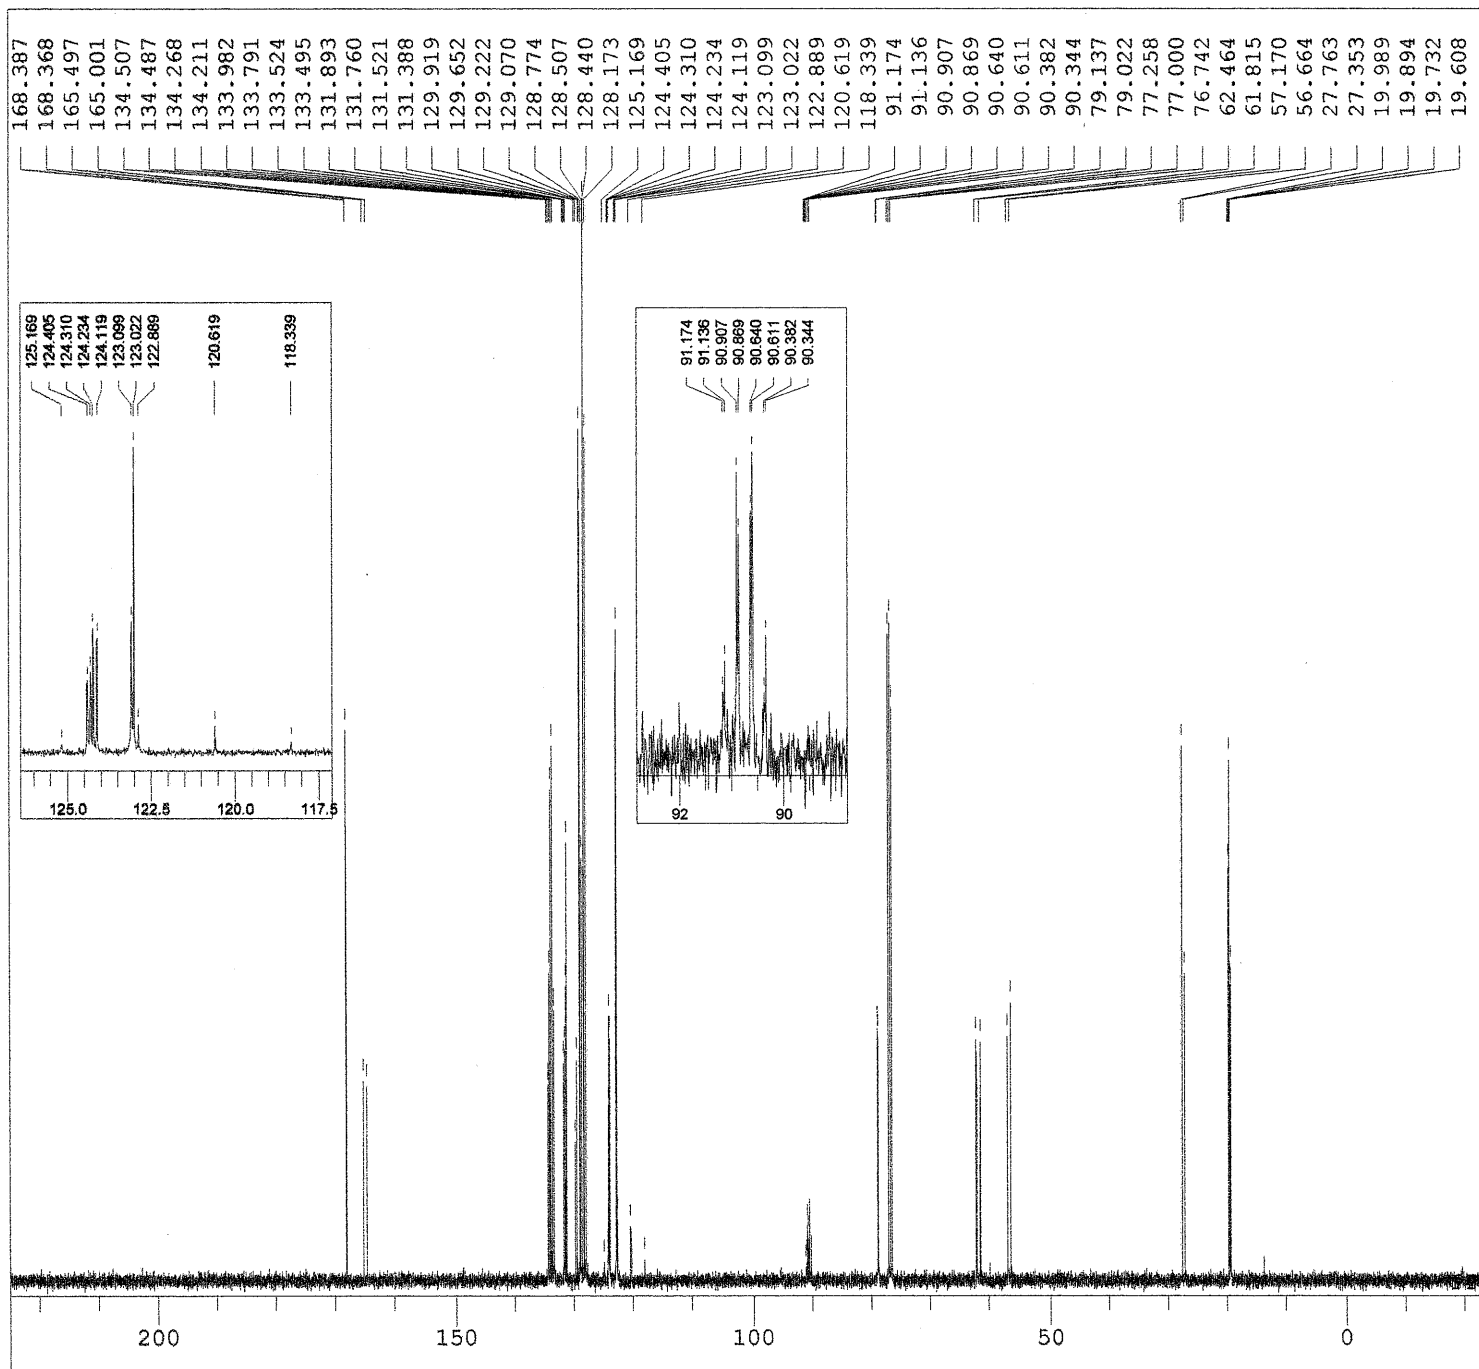

DFILE ozawa04-060\_13c.jdf  
COMNT valinol, Bn  
DATIM 2014-03-17 13:26:26  
OBNUC 13C  
EXMOD carbon.jxp  
OBFRQ 125.77 MHz  
OBSET 7.87 KHz  
OBFIN 4.21 Hz  
POINT 32767  
FREQU 39308.18 Hz  
SCANS 160  
ACQTM 0.8336 sec  
PD 3.0000 sec  
PW1 3.40 usec  
IRNUC 1H  
CTEMP 21.3 c  
SLVNT CDCL3  
EXREF 77.00 ppm  
BF 0.42 Hz  
RGAIN 60

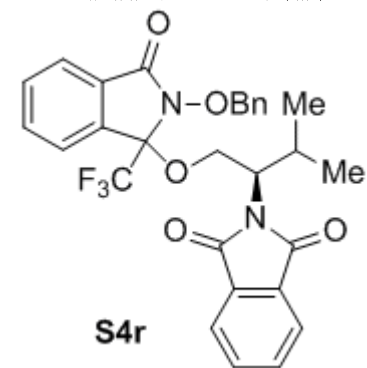

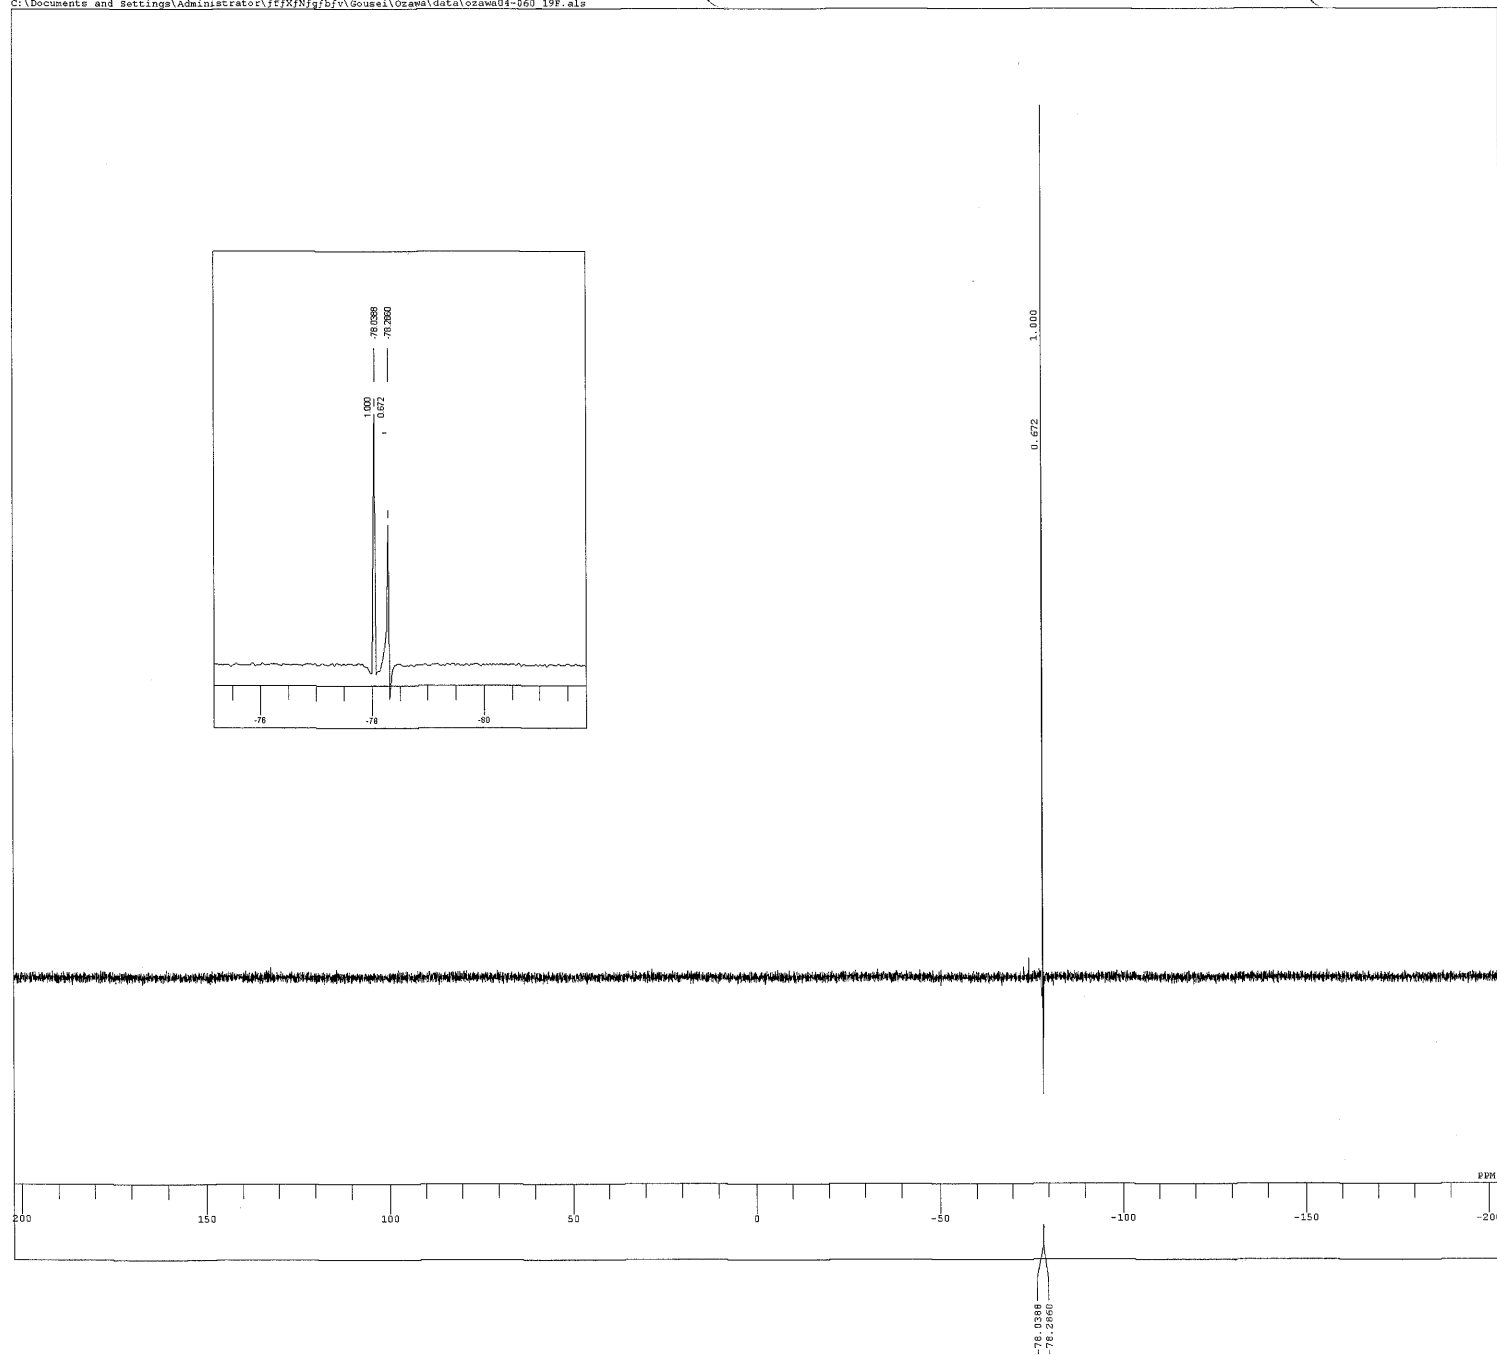

DFILE ozawa04-060\_19F.als  
 COMPT D-valinol-N-phth  
 DATIM 02-12-2013 21:18:26  
 CQNUM 19F  
 EXMOD proton.jpg  
 OBFRQ 368.64 MHz  
 OBSST 7.53 KHz  
 OSFIN 2.85 Hz  
 POINT 13107  
 FREQU 149253.73 Hz  
 SCANS 4  
 ACQTM 0.0878 sec  
 PD 5.0000 sec  
 PW1 3.50 usec  
 IRNUC 19F  
 CTXMP 21.4 c  
 SLVMT CDCL3  
 EXREF -164.90 ppm  
 SF 0.12 Hz  
 RGAIN 50

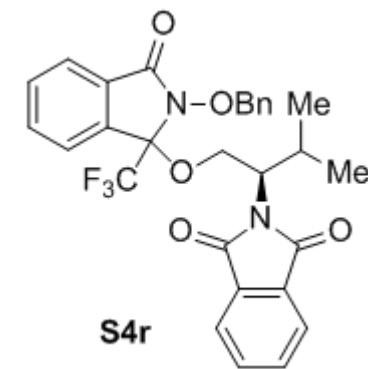





\\172.20.1.201\users\delta\Documents\JEOL\data\ozawa04-064\_COSY.jdf

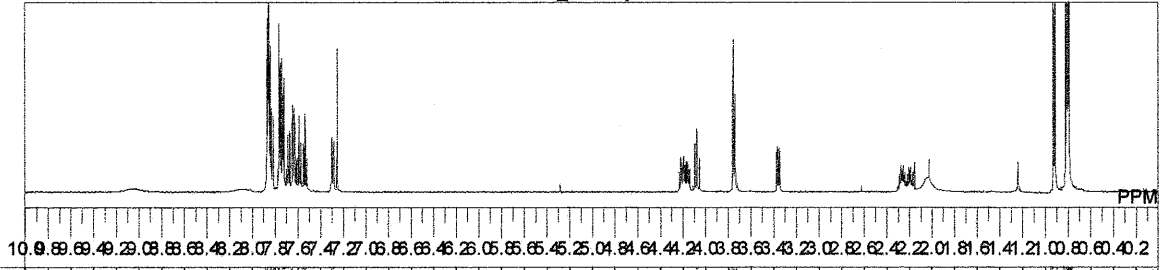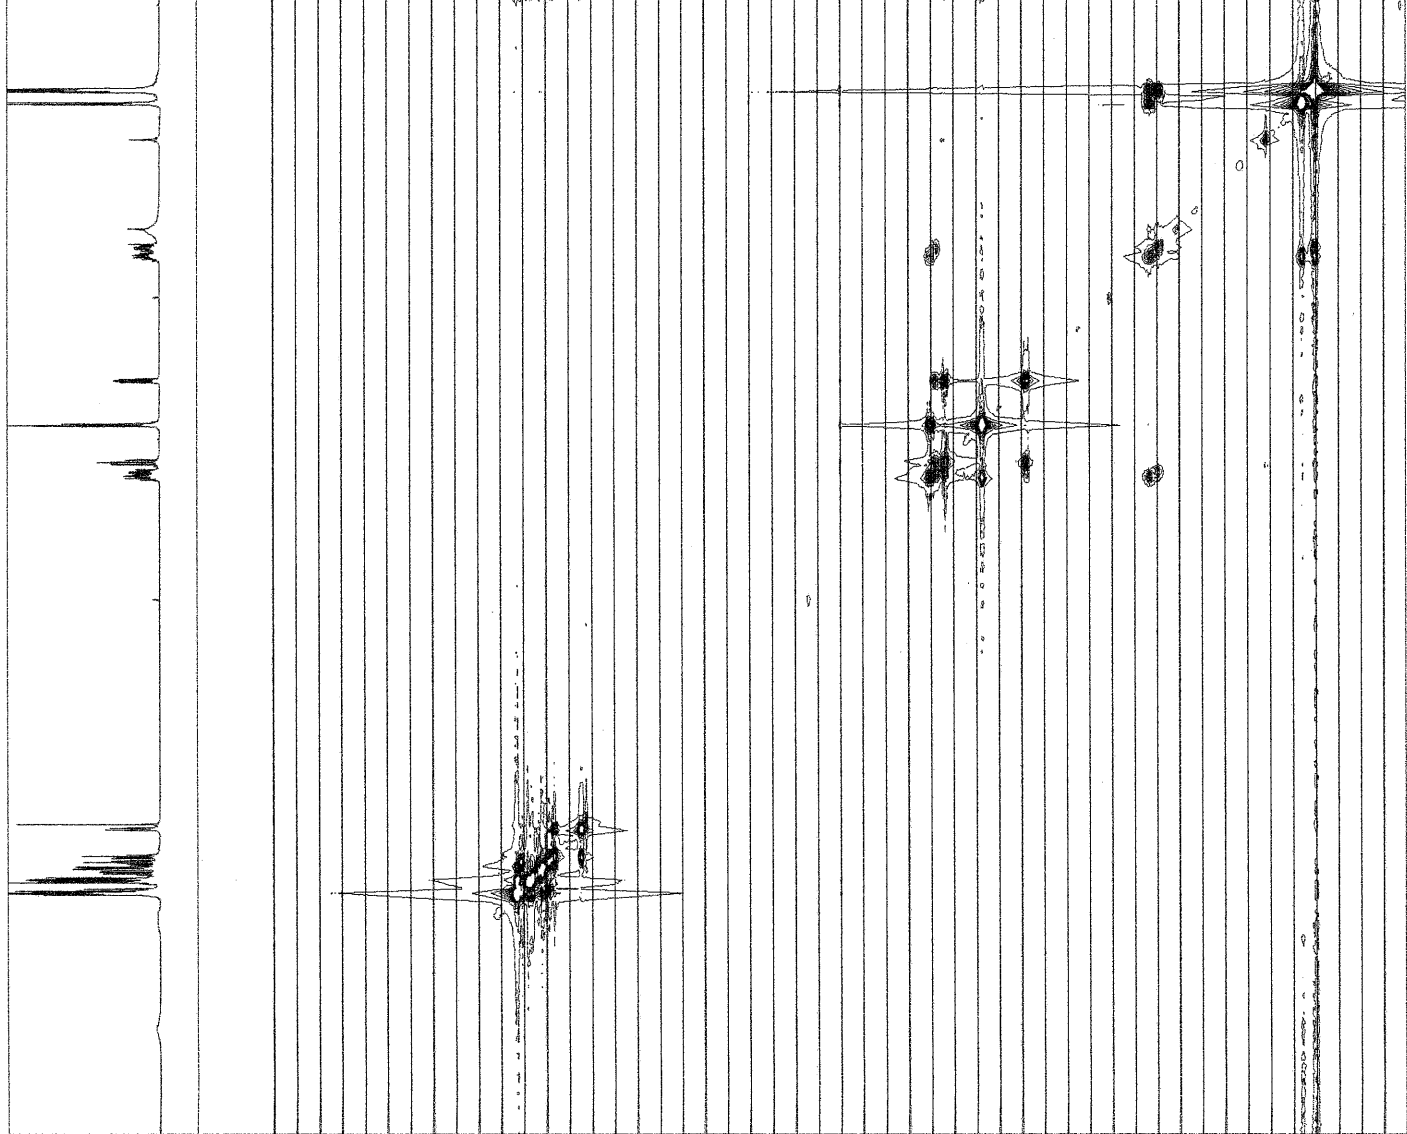

DFILE ozawa04-064\_COSY.jdf  
COMNT valinol, OH  
DATIM 18-08-2014 19:34:41  
EXMOD cosy.jxp  
OBNUC 1H  
OBFRQ 500.16 MHz  
OBSET 2.41 KHz  
OBFIN 6.01 Hz  
POINT 1280  
FREQU 6253.13 Hz  
CLPNT 256  
TODAT 256  
CLFRQ 5002.00 Hz  
SCANS 2  
ACQTM 0.2047 sec  
PD 1.5000 sec  
PW1 11.10 usec  
PW2 0.00 usec  
PW3 0.00 usec  
PI1 0.0000 msec  
PI2 0.0000 msec  
PI3 0.0000 msec  
IRNUC 1H  
CTEMP 25.9 c  
SLVNT CDCL3  
EXREF 7.26 ppm  
CLEXR 7.26  
RGAIN 48

valinol, OH

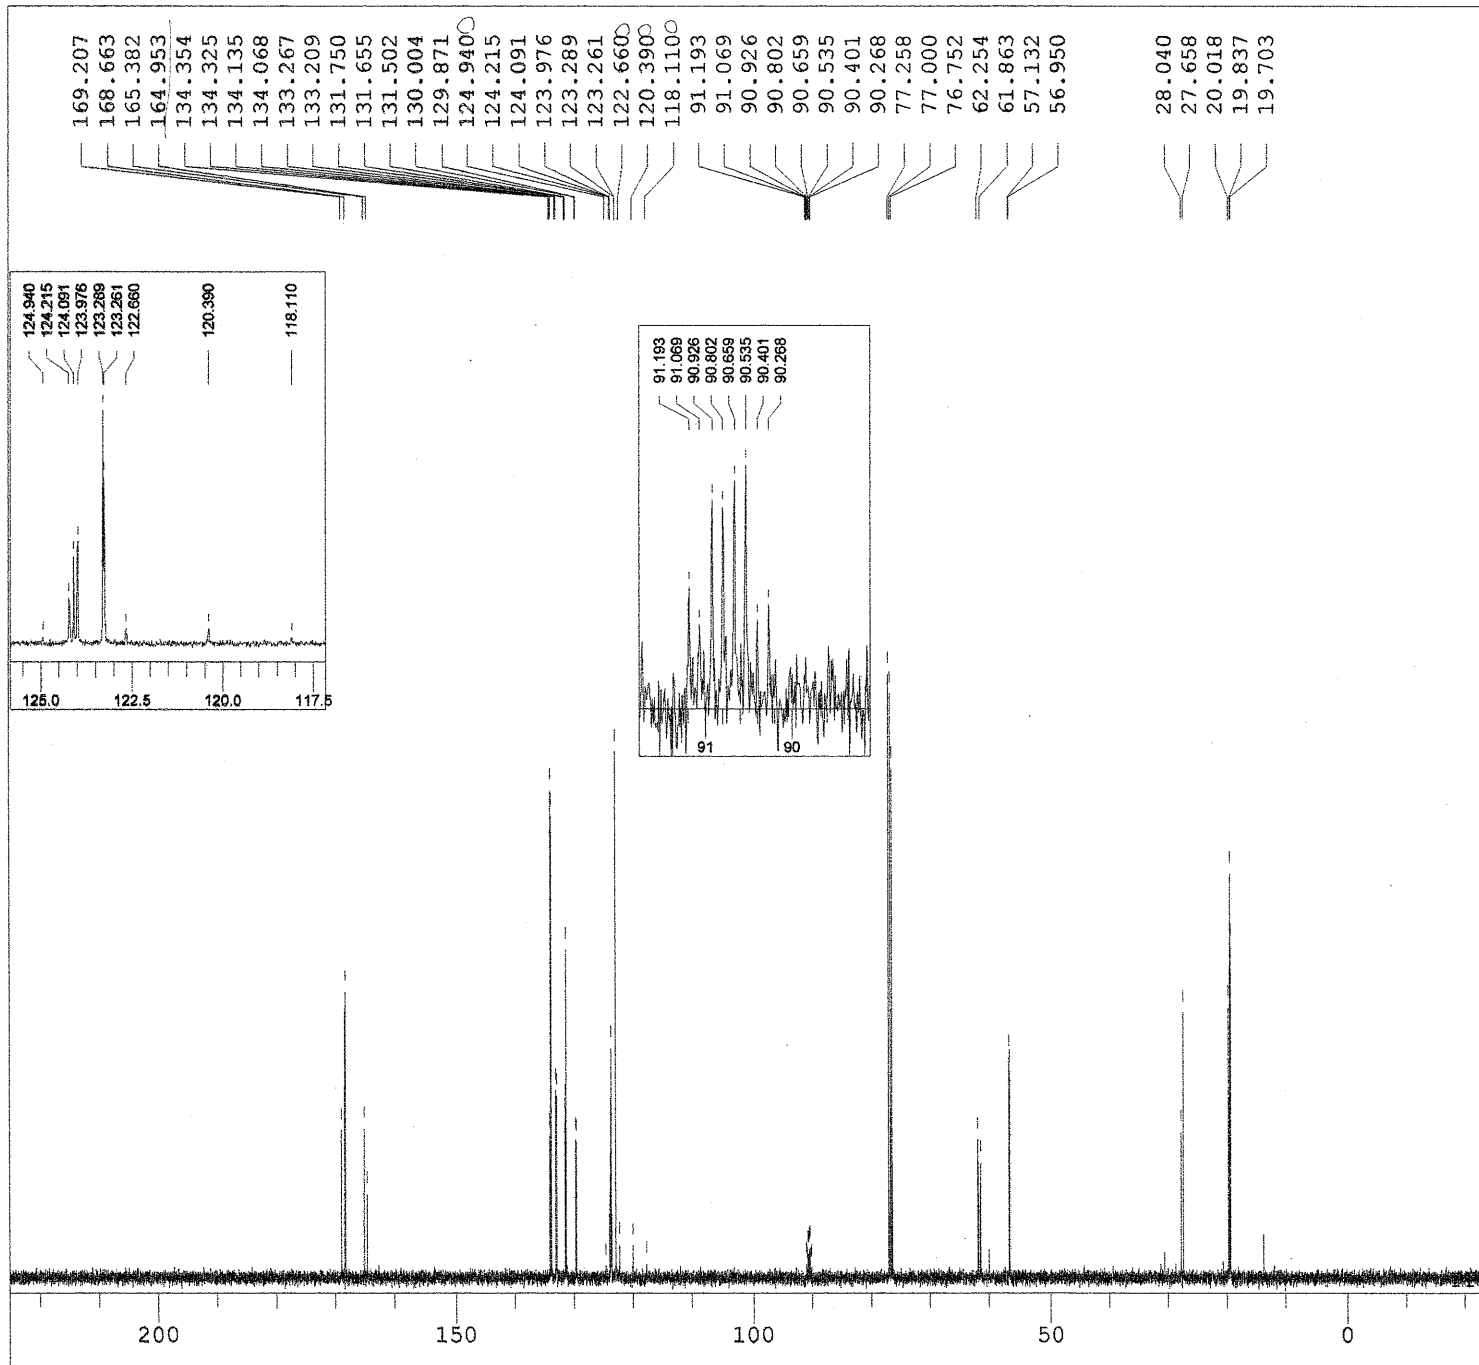

DFILE ozawa04-064\_13C.jdf  
COMNT valinol, OH  
DATIM 2014-03-17 13:12:34  
OBNUC 13C  
EXMOD carbon.jxp  
OBFRQ 125.77 MHz  
OBSET 7.87 KHz  
OBFIN 4.21 Hz  
POINT 32767  
FREQU 39308.18 Hz  
SCANS 124  
ACQTM 0.8336 sec  
PD 3.0000 sec  
PW1 3.40 usec  
IRNUC 1H  
CTEMP 21.5 c  
SLVNT CDCL3  
EXREF 77.00 ppm  
BF 0.42 Hz  
RGAIN 60

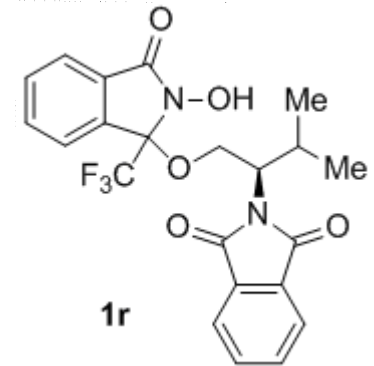

valinol, OH

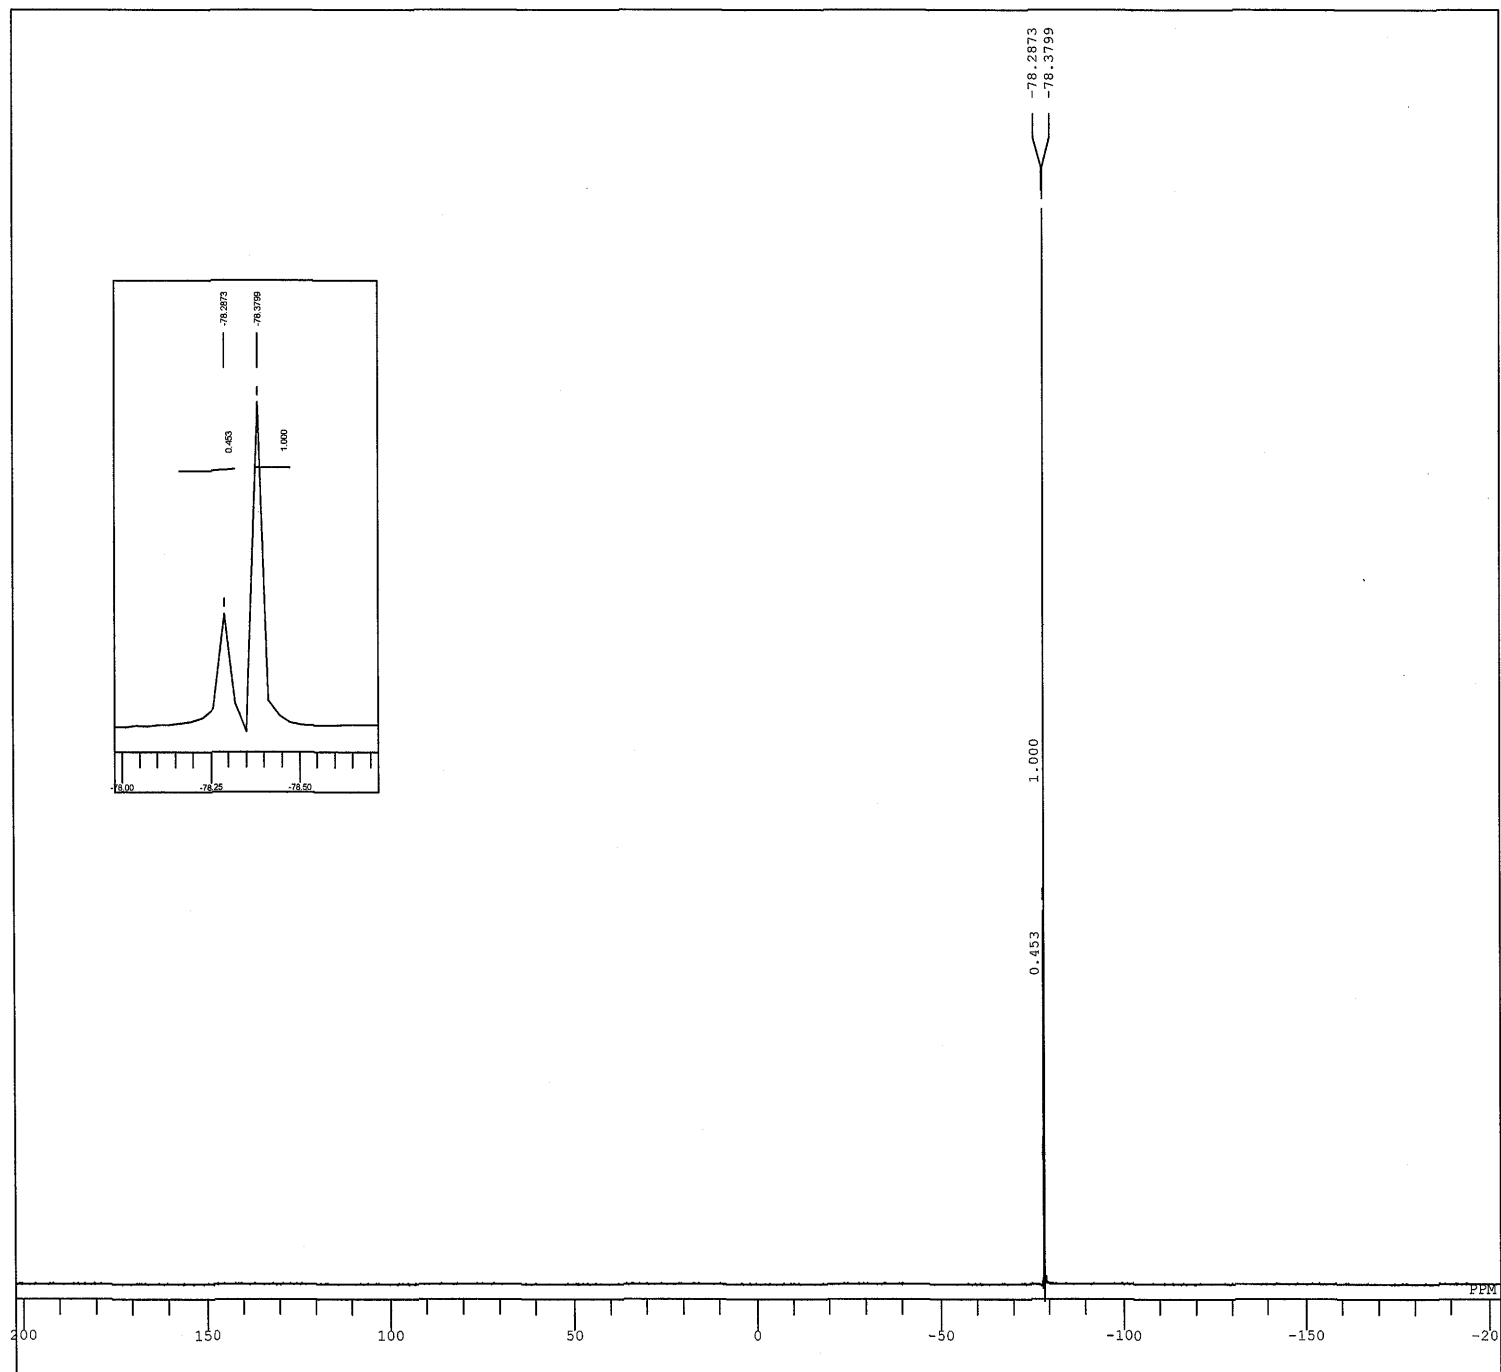

DFILE ozawa04-064\_19F.jdf  
COMNT valinol, OH  
DATIM 11-02-2014 19:56:06  
OBNUC 19F  
EXMOD proton.jxp  
OBFRQ 368.64 MHz  
OBSET 7.63 KHz  
OBFIN 2.85 Hz  
POINT 16384  
FREQU 186567.17 Hz  
SCANS 4  
ACQTM 0.0878 sec  
PD 5.0000 sec  
PW1 3.90 usec  
IRNUC 19F  
CTEMP 21.2 c  
SLVNT CDCL3  
EXREF -164.90 ppm  
BF 1.00 Hz  
RGAIN 46

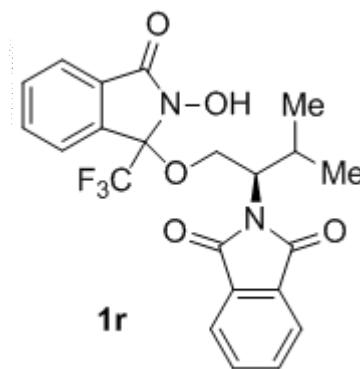



DFILE ozawa04-116b\_COSY.jdf  
 COMNT valinol, [O]  
 DATIM 08-02-2014 21:15:04  
 EXMOD cosy.jxp  
 OBNUC 1H  
 OBFRQ 500.16 MHz  
 OBSET 1.41 KHz  
 OBFIN 5.69 Hz  
 POINT 1280  
 FREQU 2501.00 Hz  
 CLPNT 256  
 TODAT 256  
 CLFRQ 2000.80 Hz  
 SCANS 1  
 ACQTM 0.5118 sec  
 PD 2.5000 sec  
 PW1 11.10 usec  
 PW2 0.00 usec  
 PW3 0.00 usec  
 PI1 0.0000 msec  
 PI2 0.0000 msec  
 PI3 0.0000 msec  
 IRNUC 1H  
 CTEMP 21.8 c  
 SLVNT CDCL3  
 EXREF 7.26 ppm  
 CLEXR 7.26  
 RGAIN 50

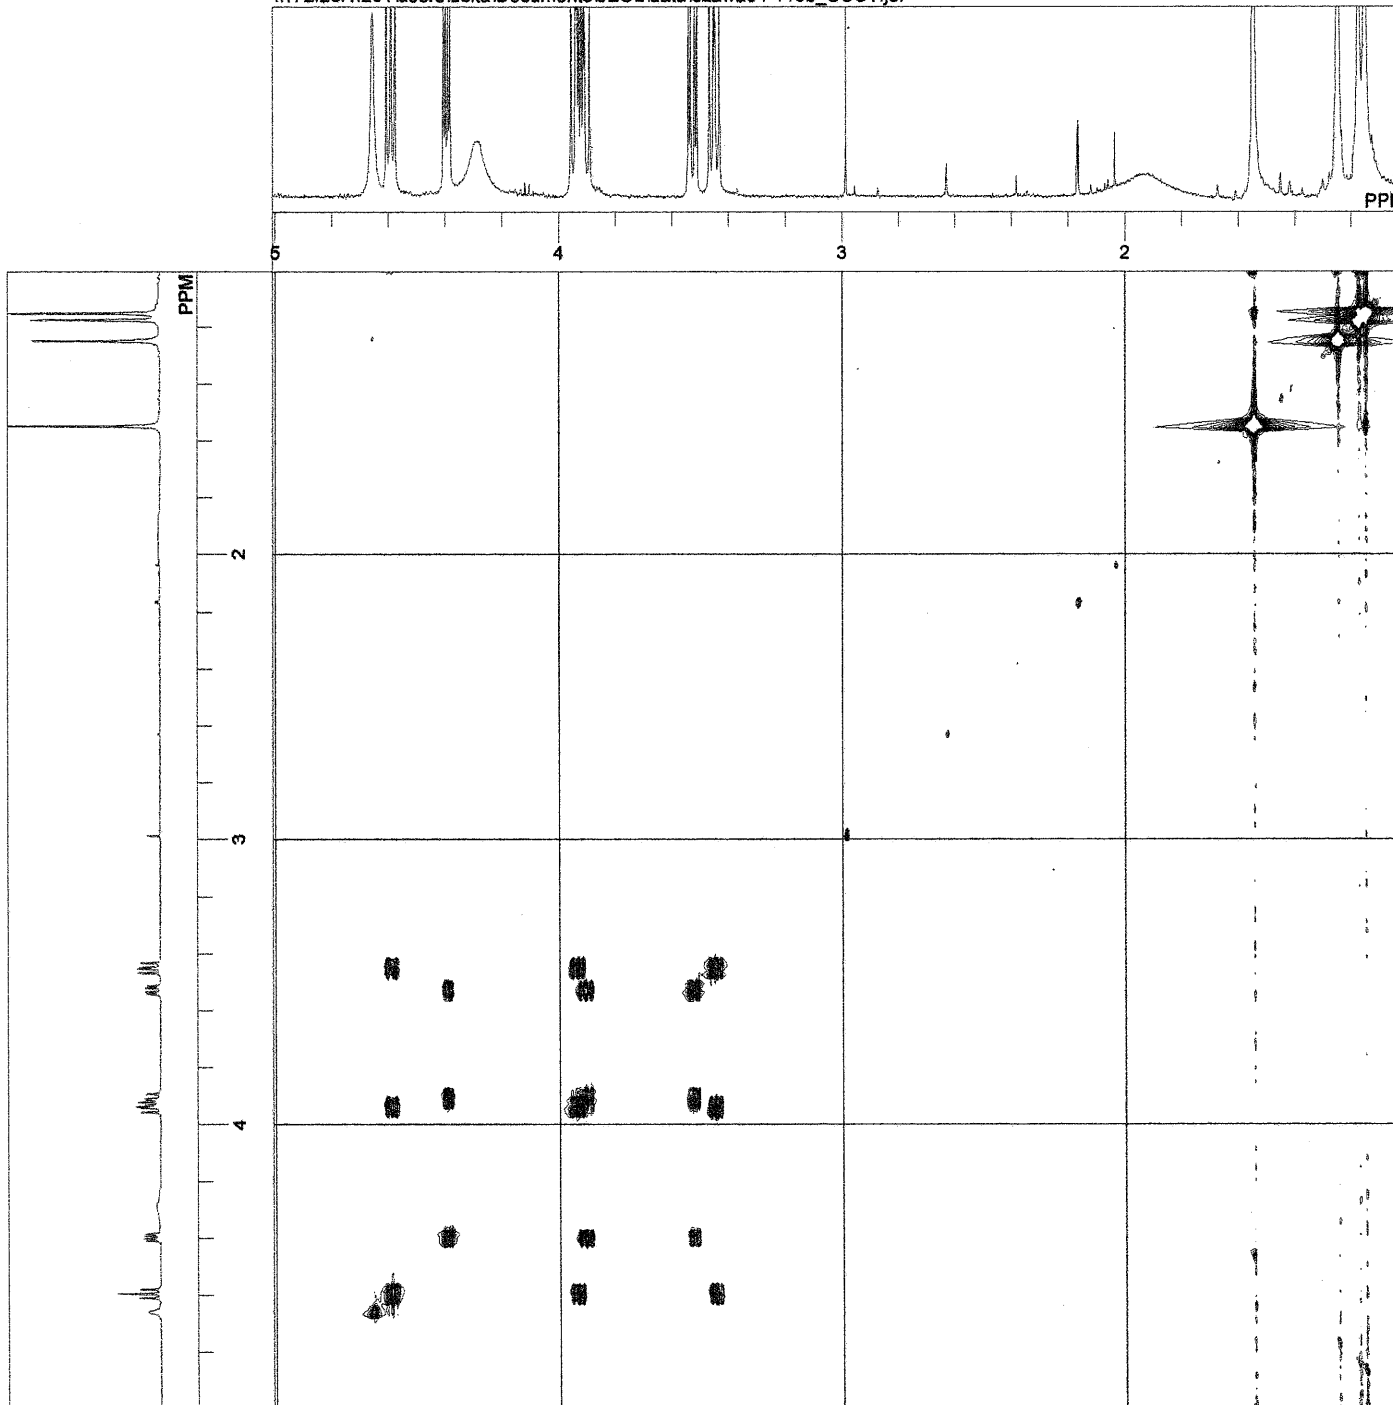

\\172.20.1.201\users\delta\Documents\JEOL\data\ozawa04-116b\_COSY\_aroma.jdf

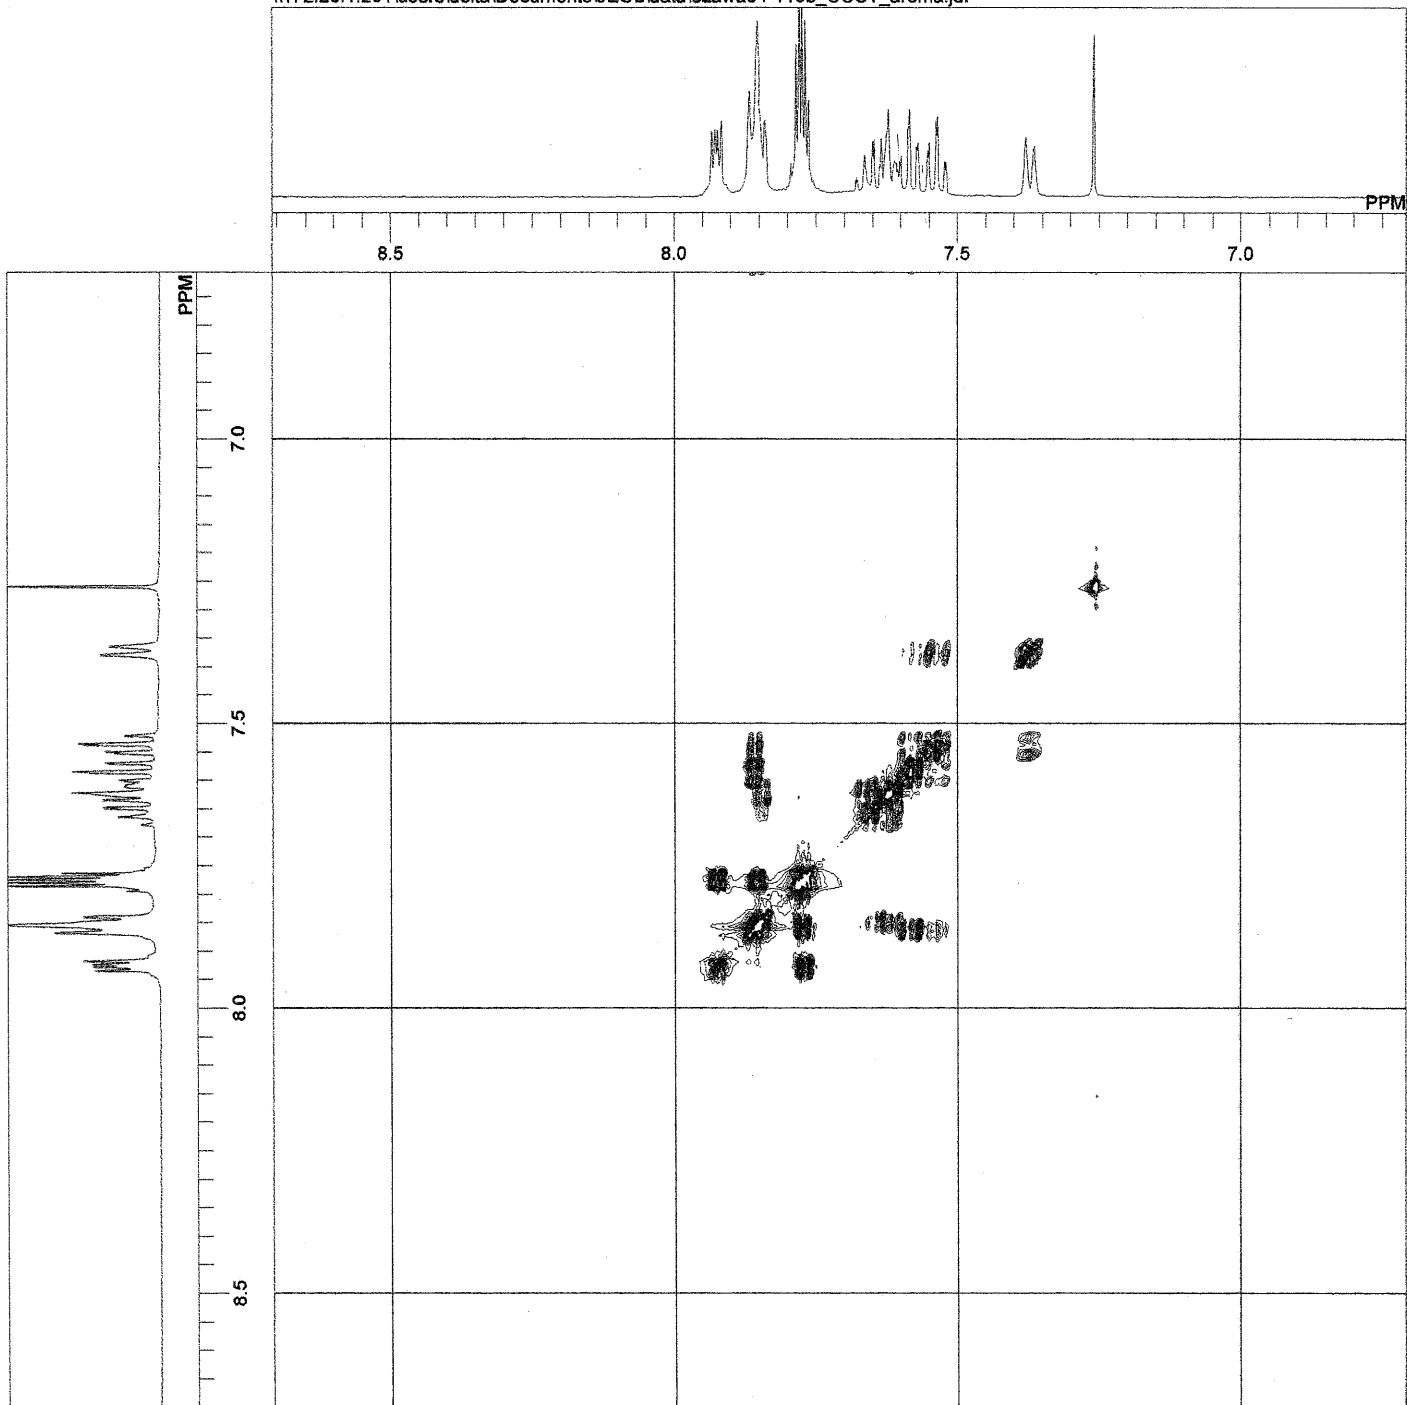

DFILE ozawa04-116b\_COSY\_aroma.jdf  
COMNT valinol, [O]  
DATIM 11-02-2014 21:00:49  
EXMOD cosy.jpg  
OBNUC 1H  
OBFRQ 500.16 MHz  
OBSET 3.76 KHz  
OBFIN 6.44 Hz  
POINT 1280  
FREQU 1250.50 Hz  
CLPNT 256  
TODAT 256  
CLFRQ 1000.34 Hz  
SCANS 1  
ACQTM 1.0236 sec  
PD 2.5000 sec  
PW1 11.10 usec  
PW2 0.00 usec  
PW3 0.00 usec  
PI1 0.0000 msec  
PI2 0.0000 msec  
PI3 0.0000 msec  
IRNUC 1H  
CTEMP 21.3 c  
SLVNT CDCL3  
EXREF 7.26 ppm  
CLEXR 7.26  
RGAIN 54

valinol, [O]

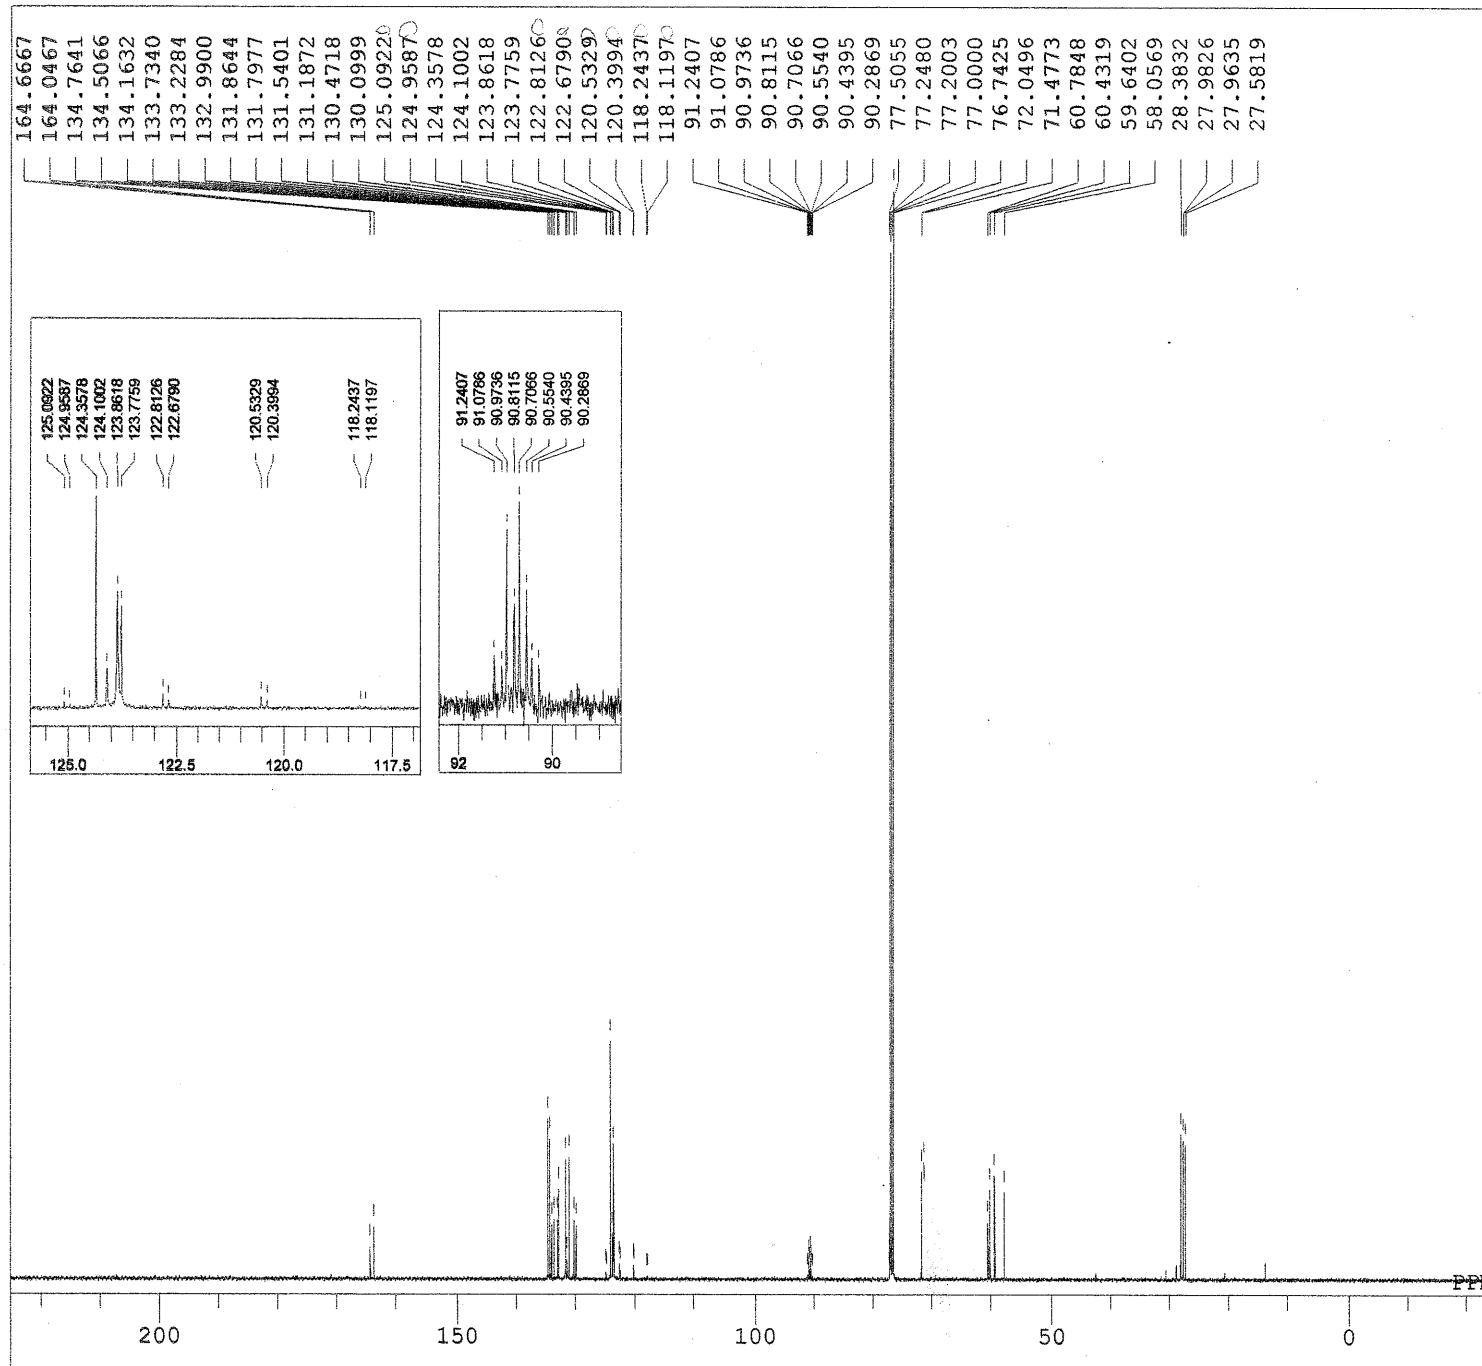

DFILE ozawa04-116b\_13C.jdf  
COMNT valinol, [O]  
DATIM 2014-03-22 22:54:06  
OBNUC 13C  
EXMOD carbon.jxp  
OBFRO 125.77 MHz  
OBSET 7.87 KHz  
OBFIN 4.21 Hz  
POINT 32767  
FREQU 39308.18 Hz  
SCANS 12788  
ACQTM 0.8336 sec  
PD 3.0000 sec  
PW1 3.40 usec  
IRNUC 1H  
CTEMP 21.4 c  
SLVNT CDCL3  
EXREF 77.00 ppm  
BF 0.12 Hz  
RGAIN 60

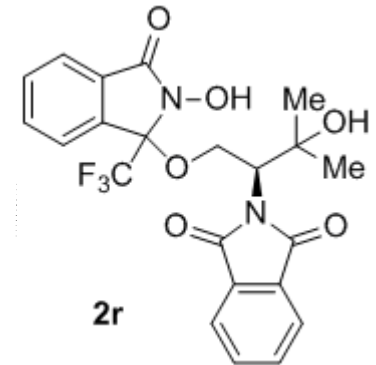



valinol, [0]

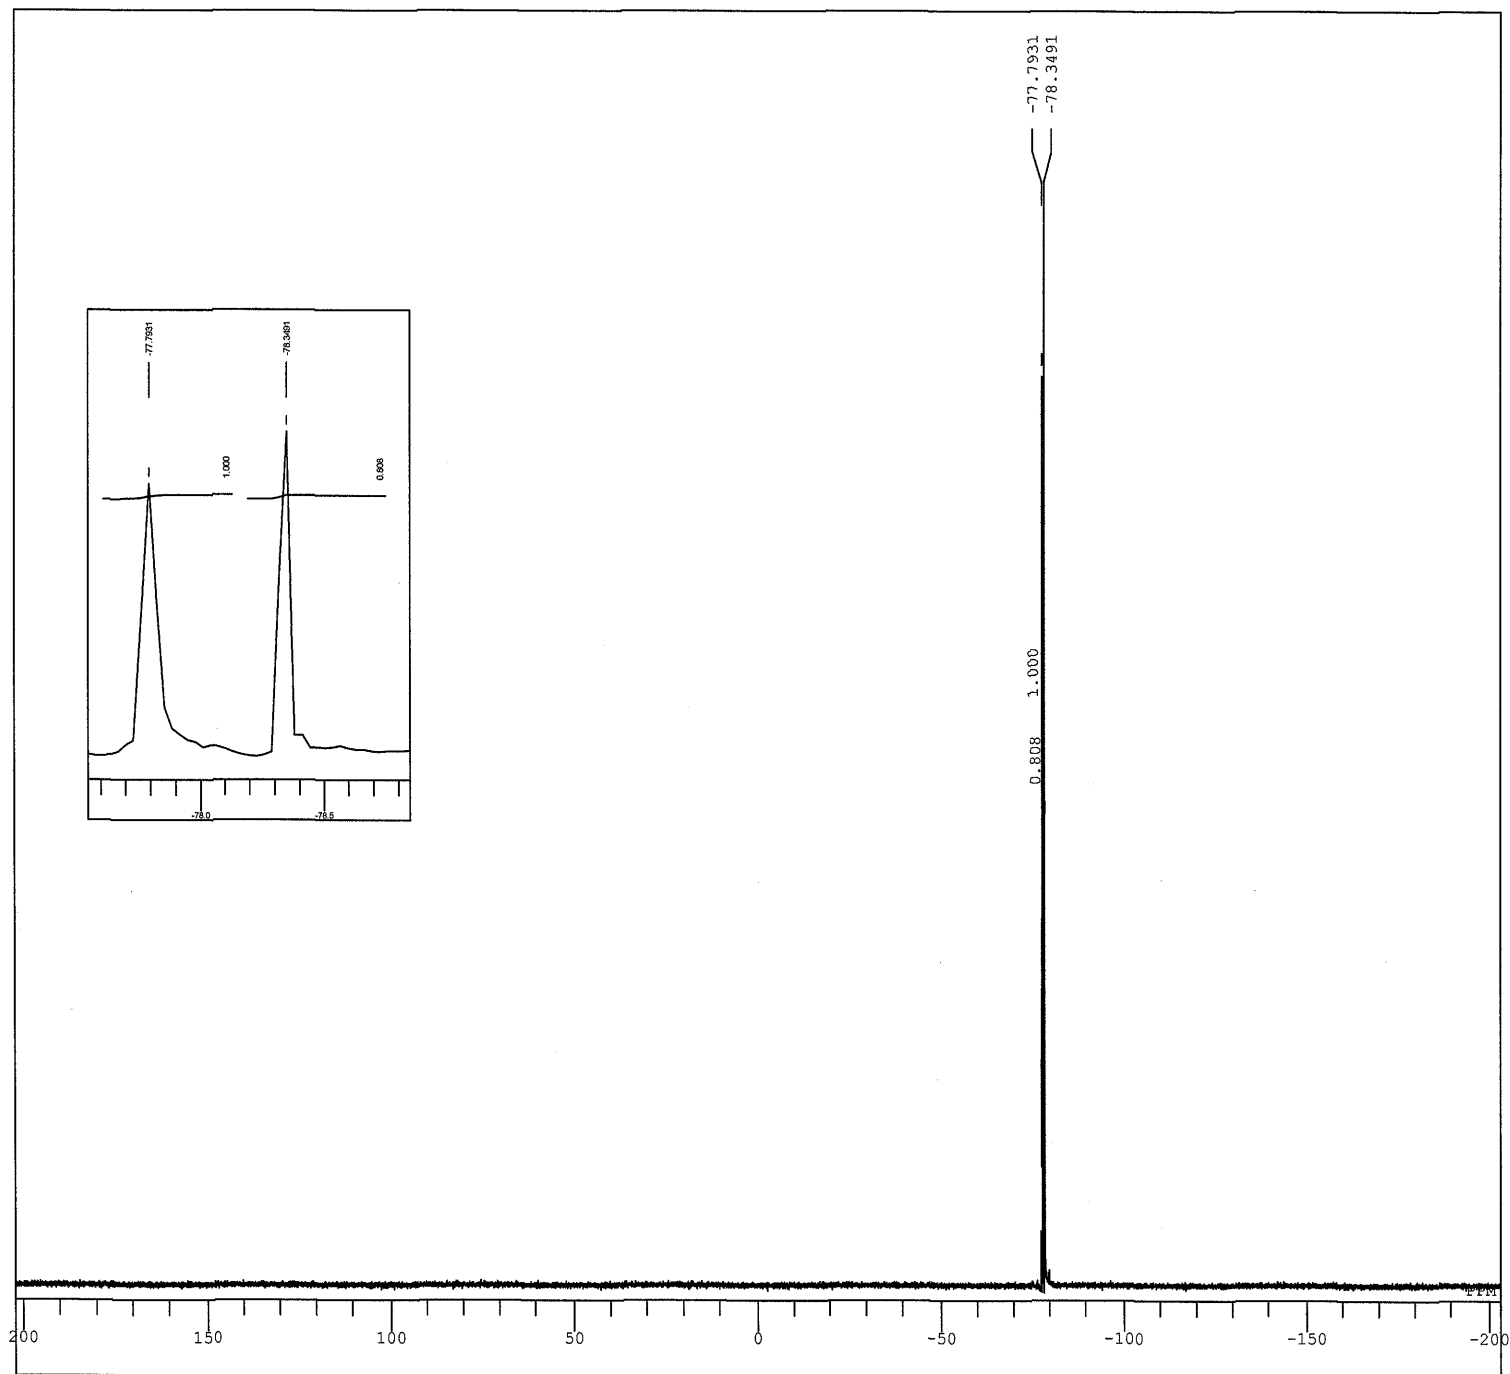

DFILE ozawa04-116b\_19F.jdf  
COMNT valinol, [0]  
DATIM 11-02-2014 19:59:11  
OBNUC 19F  
EXMOD proton.jxp  
OBFRQ 368.64 MHz  
OBSET 7.63 KHz  
OBFIN 2.85 Hz  
POINT 16384  
FREQU 186567.17 Hz  
SCANS 4  
ACQTM 0.0878 sec  
PD 5.0000 sec  
PW1 3.90 usec  
IRNUC 19F  
CTEMP 21.1 c  
SLVNT CDCL3  
EXREF -164.90 ppm  
BF 1.00 Hz  
RGAIN 48

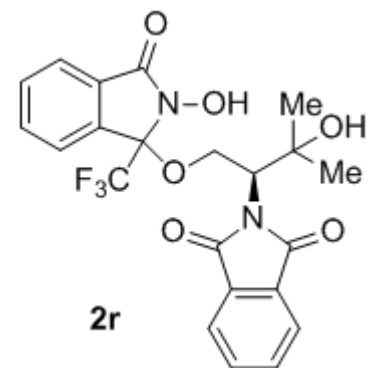

PhPROH, Bn

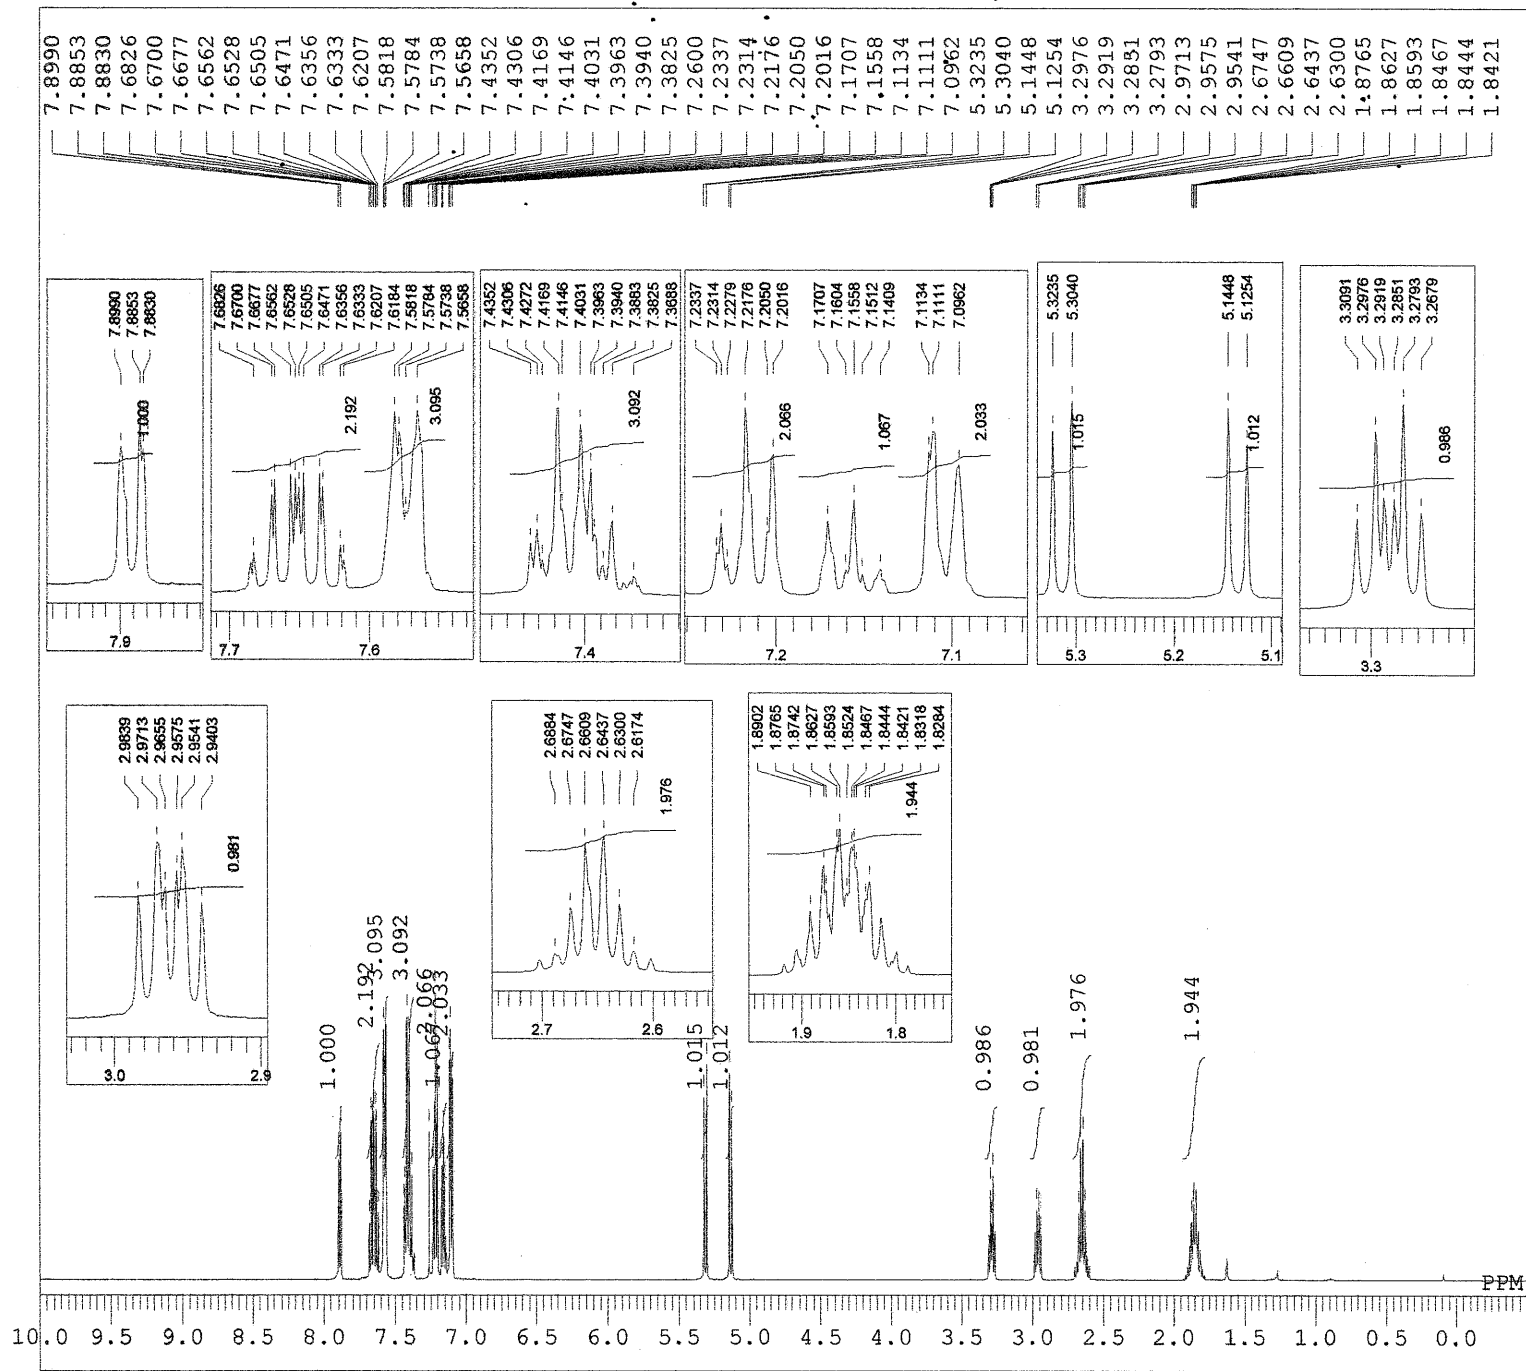

DFILE ozawa04-115\_1H.jdf  
 COMNT PhPROH, Bn  
 DATIM 2014-01-31 20:48:11  
 OBNUC 1H  
 EXMOD proton.jxp  
 OBFRQ 500.16 MHz  
 OBSET 2.41 KHz  
 OBFIN 6.01 Hz  
 POINT 16384  
 FREQU 9384.38 Hz  
 SCANS 4  
 ACQTM 1.7459 sec  
 PD 5.0000 sec  
 PW1 5.55 usec  
 IRNUC 1H  
 CTEMP 21.1 c  
 SLVNT CDCL3  
 EXREF 7.26 ppm  
 BF 0.12 Hz  
 RGAIN 34

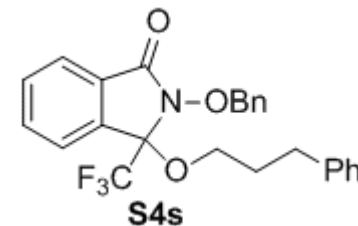

PhPROH, Bn

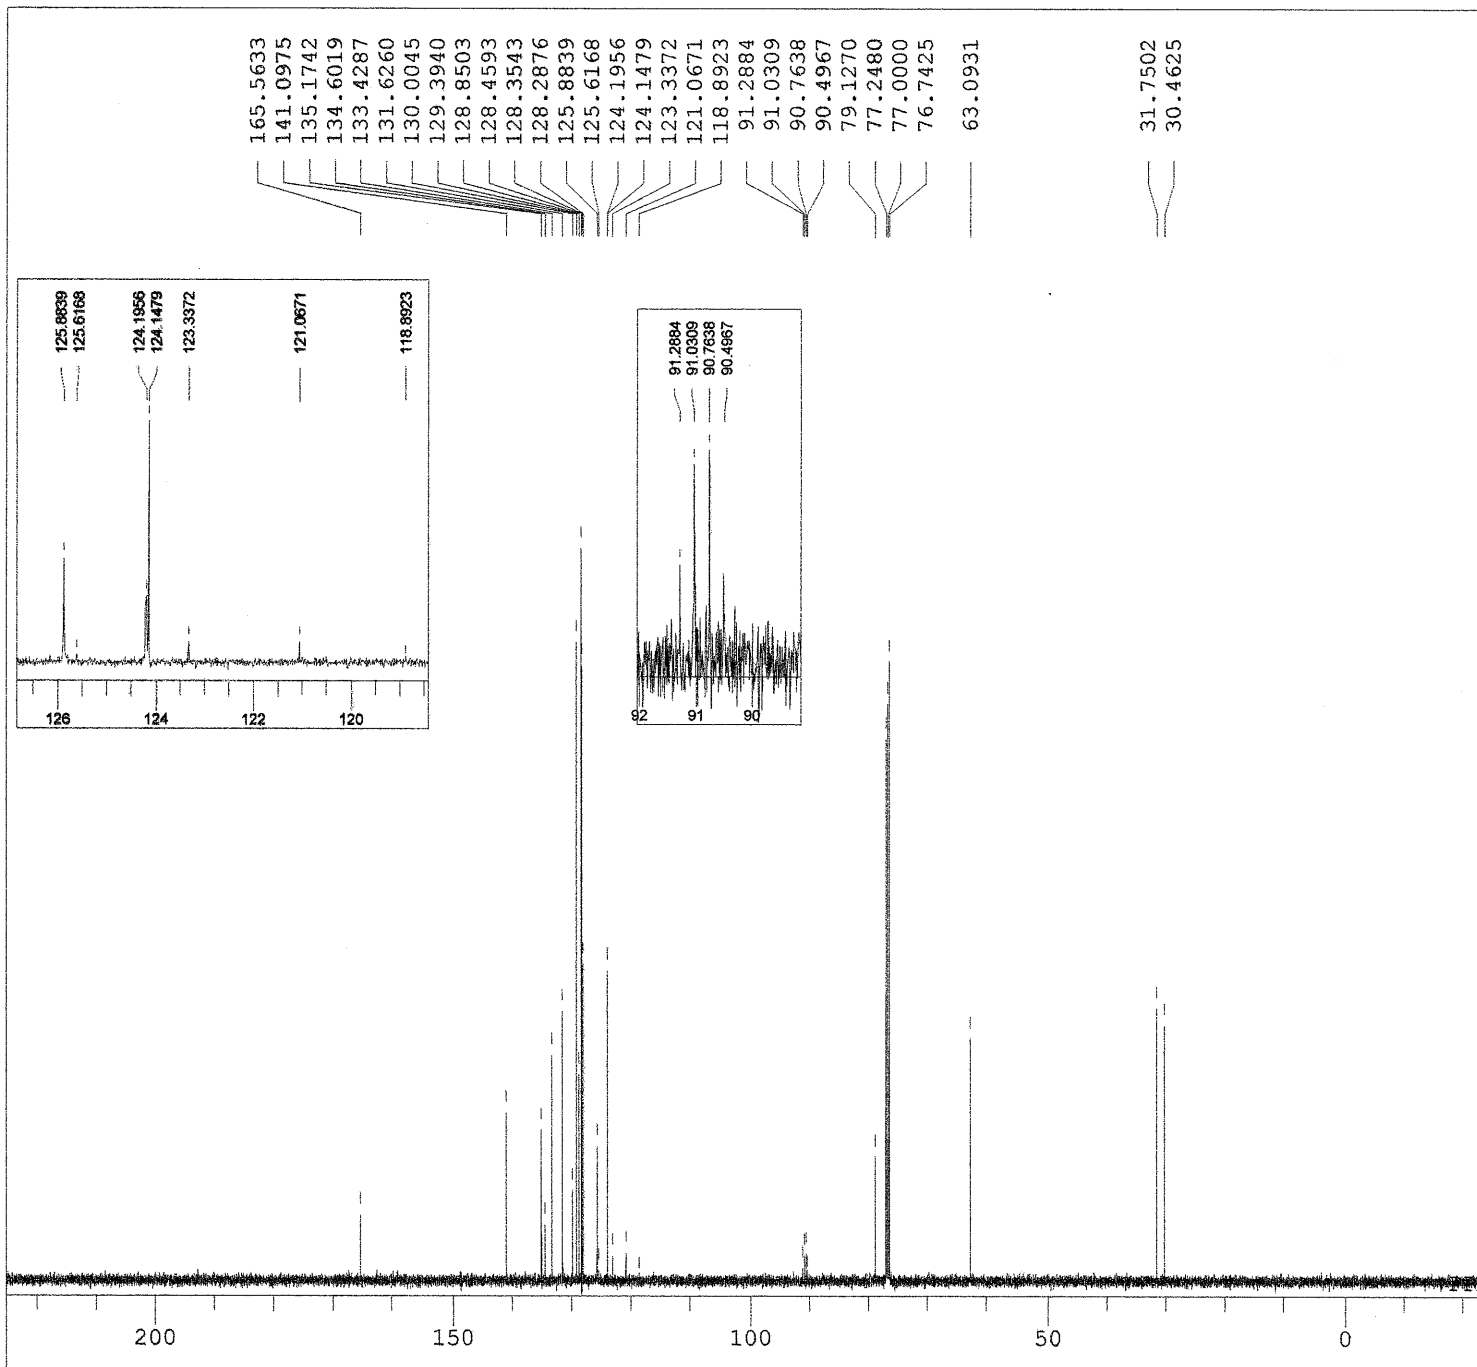

DFILE ozawa04-115\_13C.jdf  
COMNT PhPROH, Bn  
DATIM 2014-01-31 20:49:14  
OBNUC 13C  
EXMOD carbon.jxp  
OBFRQ 125.77 MHz  
OBSET 7.87 KHz  
OBFIN 4.21 Hz  
POINT 32767  
FREQU 39308.18 Hz  
SCANS 308  
ACQTM 0.8336 sec  
PD 3.0000 sec  
PW1 3.40 usec  
IRNUC 1H  
CTEMP 21.8 c  
SLVNT CDCL3  
EXREF 77.00 ppm  
BF 0.12 Hz  
RGAIN 60

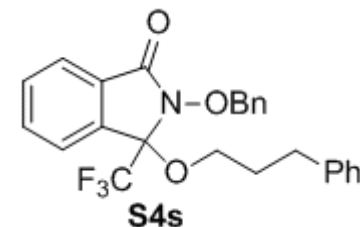

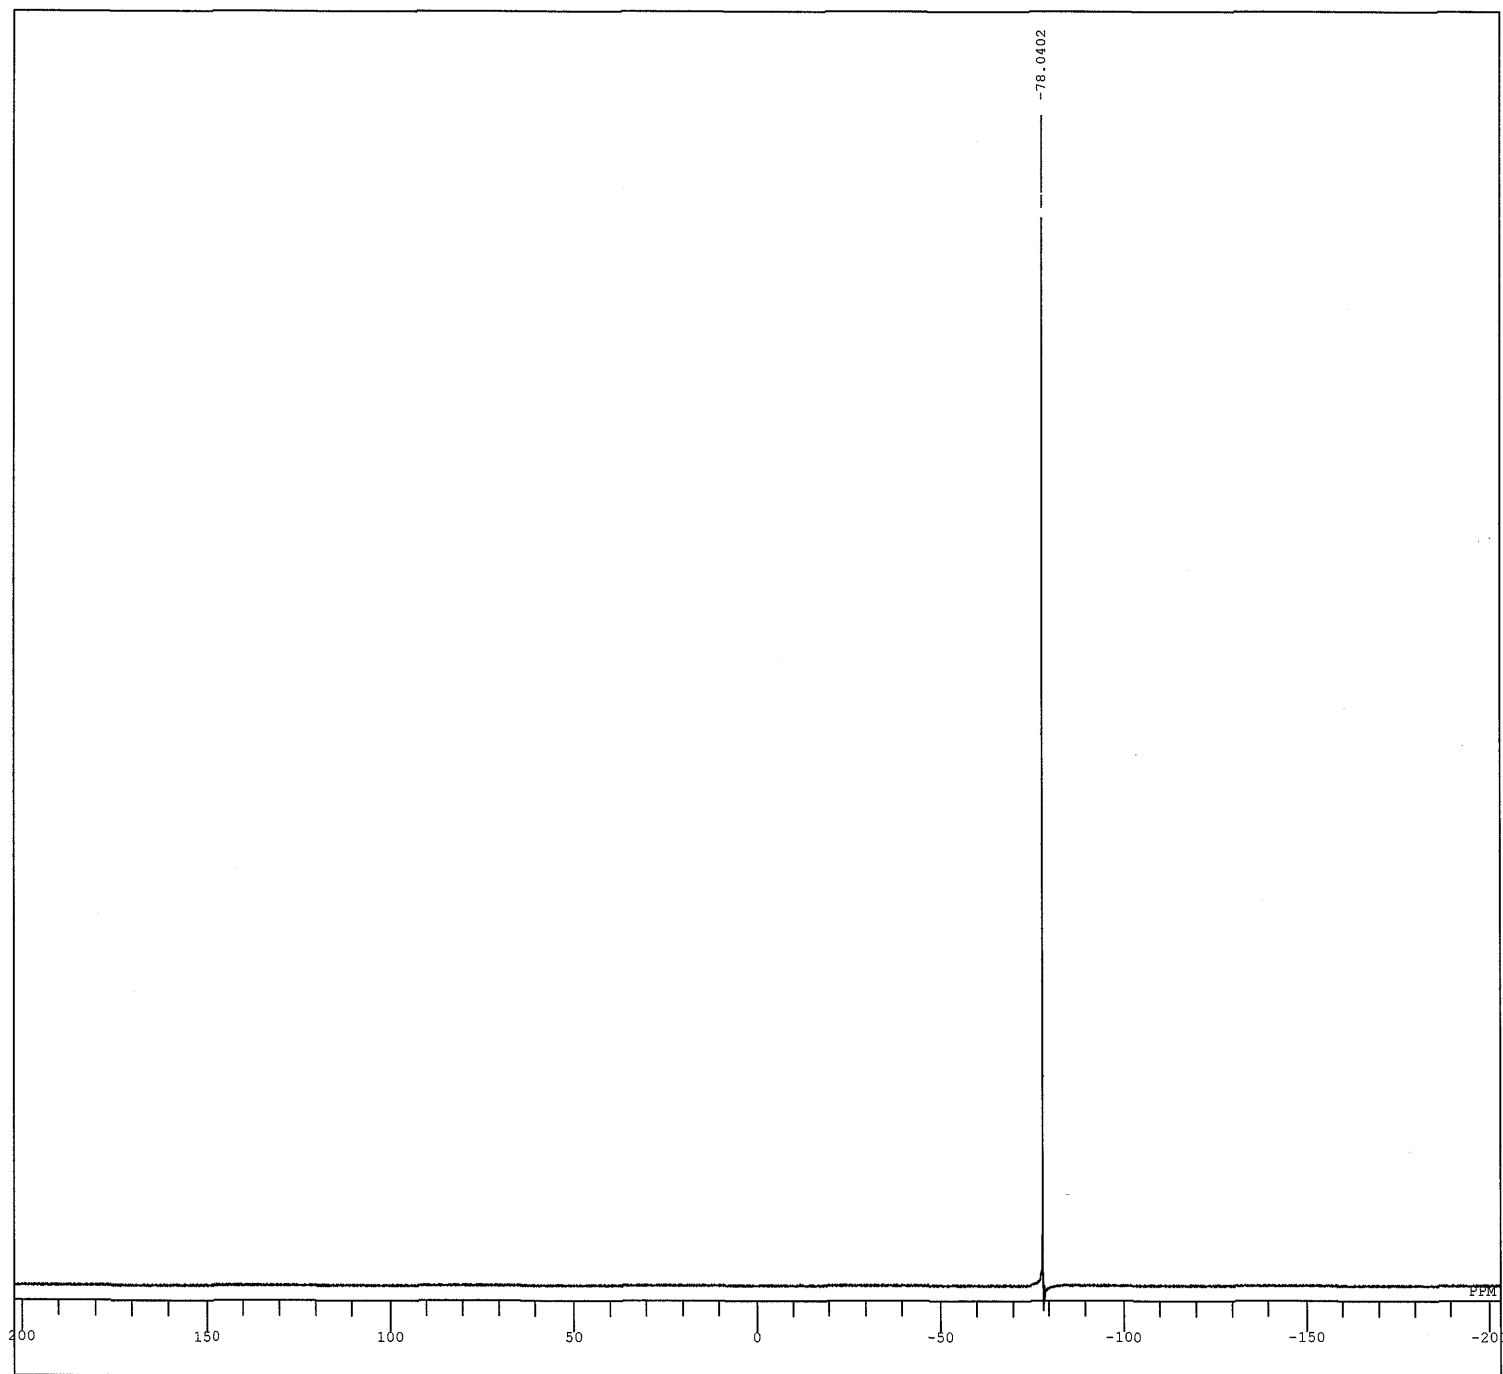

DFILE ozawa04-115\_19F.jdf  
COMNT PhPrOH, Bn  
DATIM 31-01-2014 20:43:35  
OBNUC 19F  
EXMOD proton.jxp  
OBFREQ 368.64 MHz  
OBSET 7.63 KHz  
OBFIN 2.85 Hz  
POINT 16384  
FREQU 186567.17 Hz  
SCANS 4  
ACQIM 0.0878 sec  
PD 5.0000 sec  
FW1 3.90 usec  
IRNUC 19F  
CTEMP 21.1 c  
SLVNT CDCL3  
EXREF -164.90 ppm  
BF 0.12 Hz  
RGAIN 48

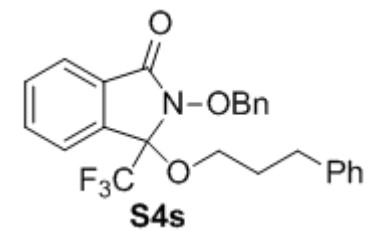

column, 3-Ph-1-propanol

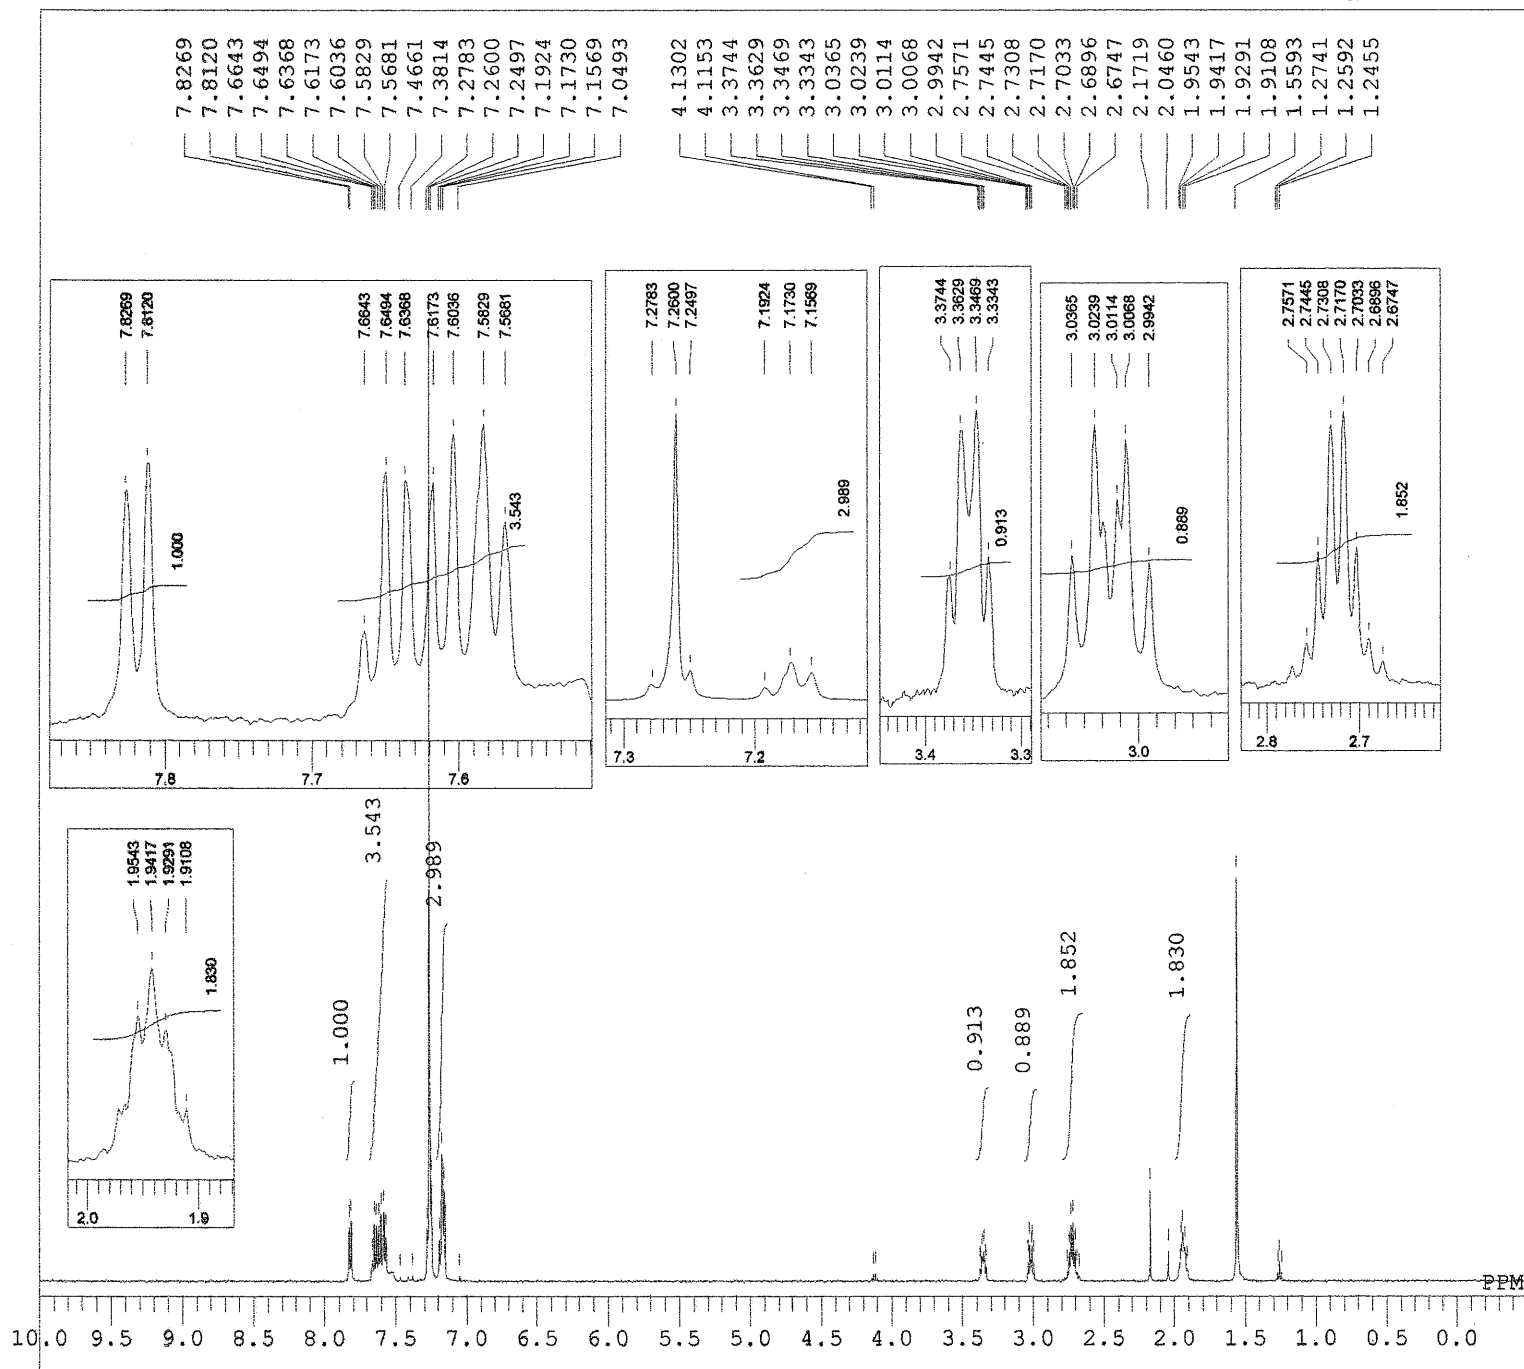

```

DFILE ozawa03-198_1.jdf
COMNT column, 3-Ph-1-propanol
DATIM 2013-10-10 20:11:21
OBNUC 1H
EXMOD proton.jxp
OBFRQ 500.16 MHz
OBSET 2.41 KHz
OBFIN 6.01 Hz
POINT 16384
FREQU 9384.38 Hz
SCANS 4
ACQTM 1.7459 sec
PD 5.0000 sec
PW1 5.55 usec
IRNUC 1H
CTEMP 25.5 c
SLVNT CDCL3
EXREF 7.26 ppm
BF 1.00 Hz
RGAIN 40
    
```

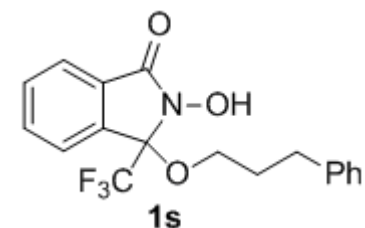

PhPrOH, OH

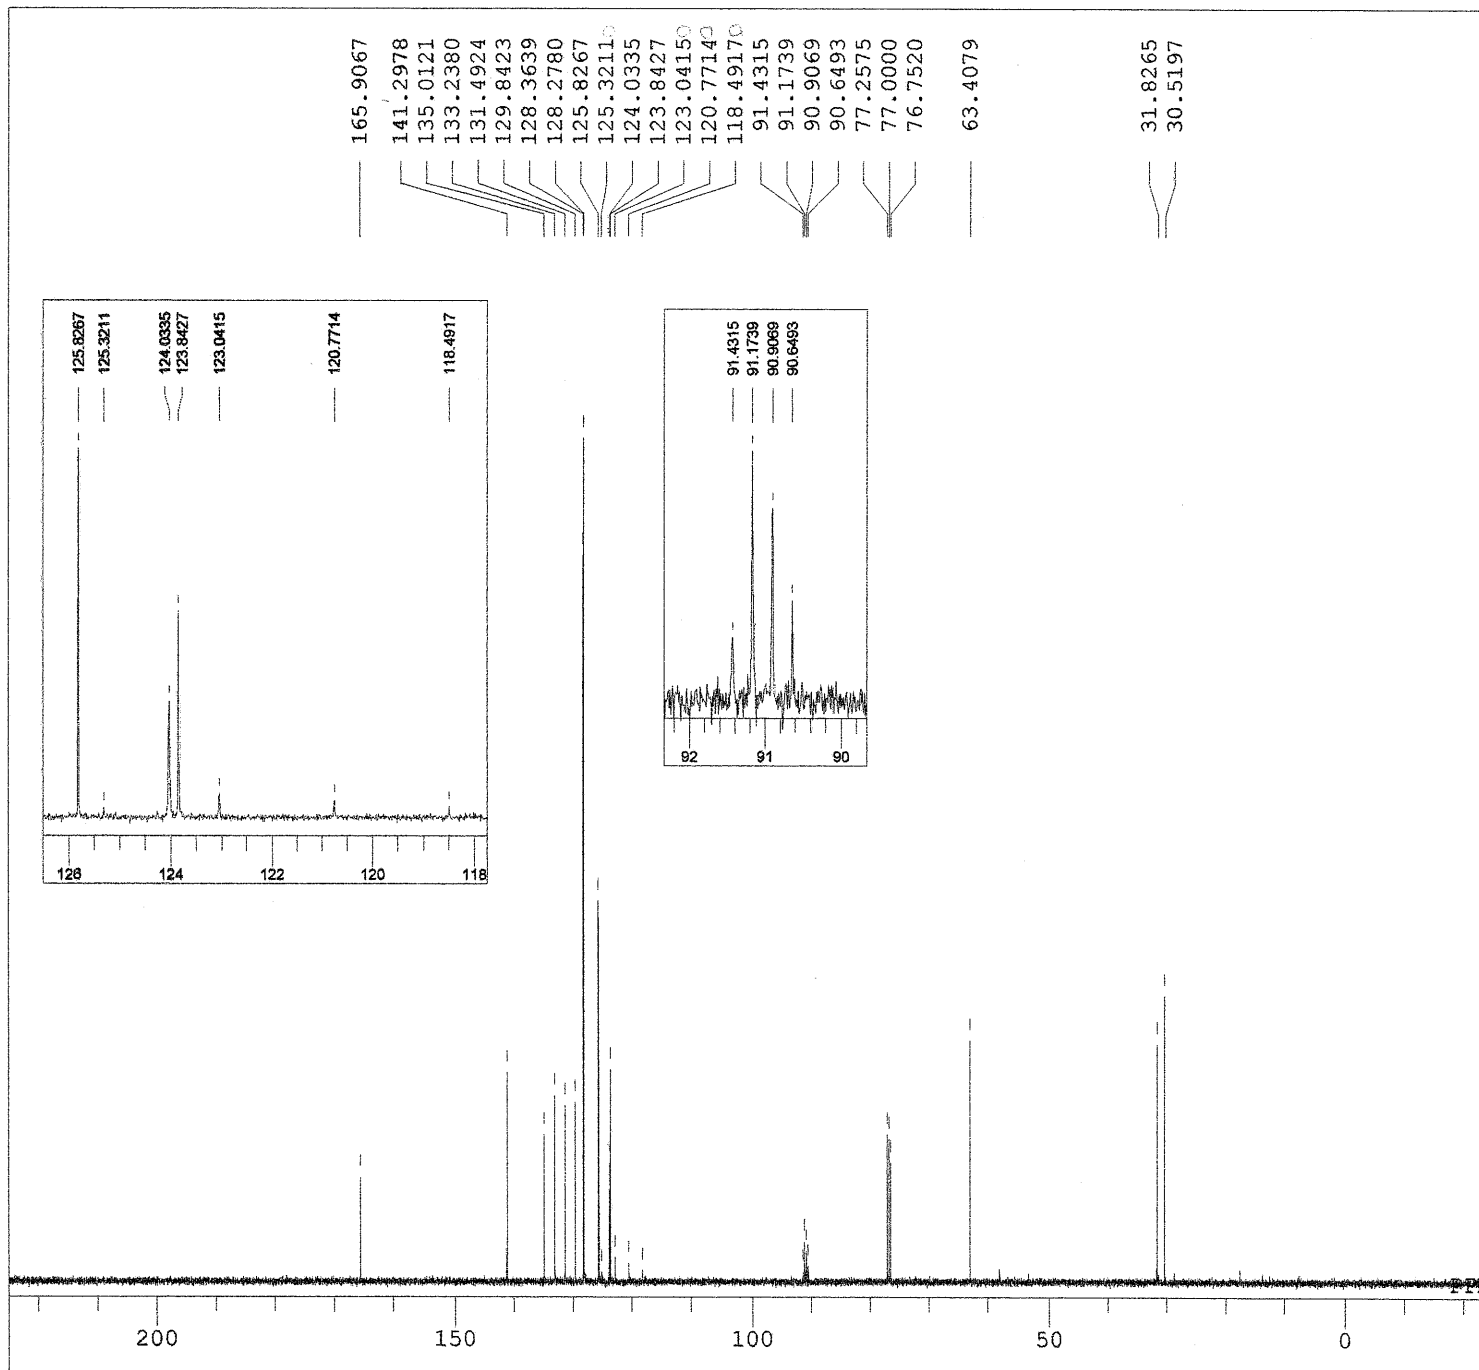

DFILE ozawa03-198\_13C.jdf  
COMNT PhPrOH, OH  
DATIM 2014-01-29 12:20:25  
OBNUC 13C  
EXMOD carbon.jxp  
OBFRQ 125.77 MHz  
OBSET 7.87 KHz  
OBFIN 4.21 Hz  
POINT 32767  
FREQU 39308.18 Hz  
SCANS 60  
ACQTM 0.8336 sec  
PD 3.0000 sec  
PW1 3.40 usec  
IRNUC 1H  
CTEMP 21.9 c  
SLVNT CDCL3  
EXREF 77.00 ppm  
BF 0.12 Hz  
RGAIN 60

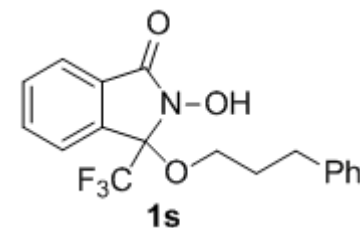

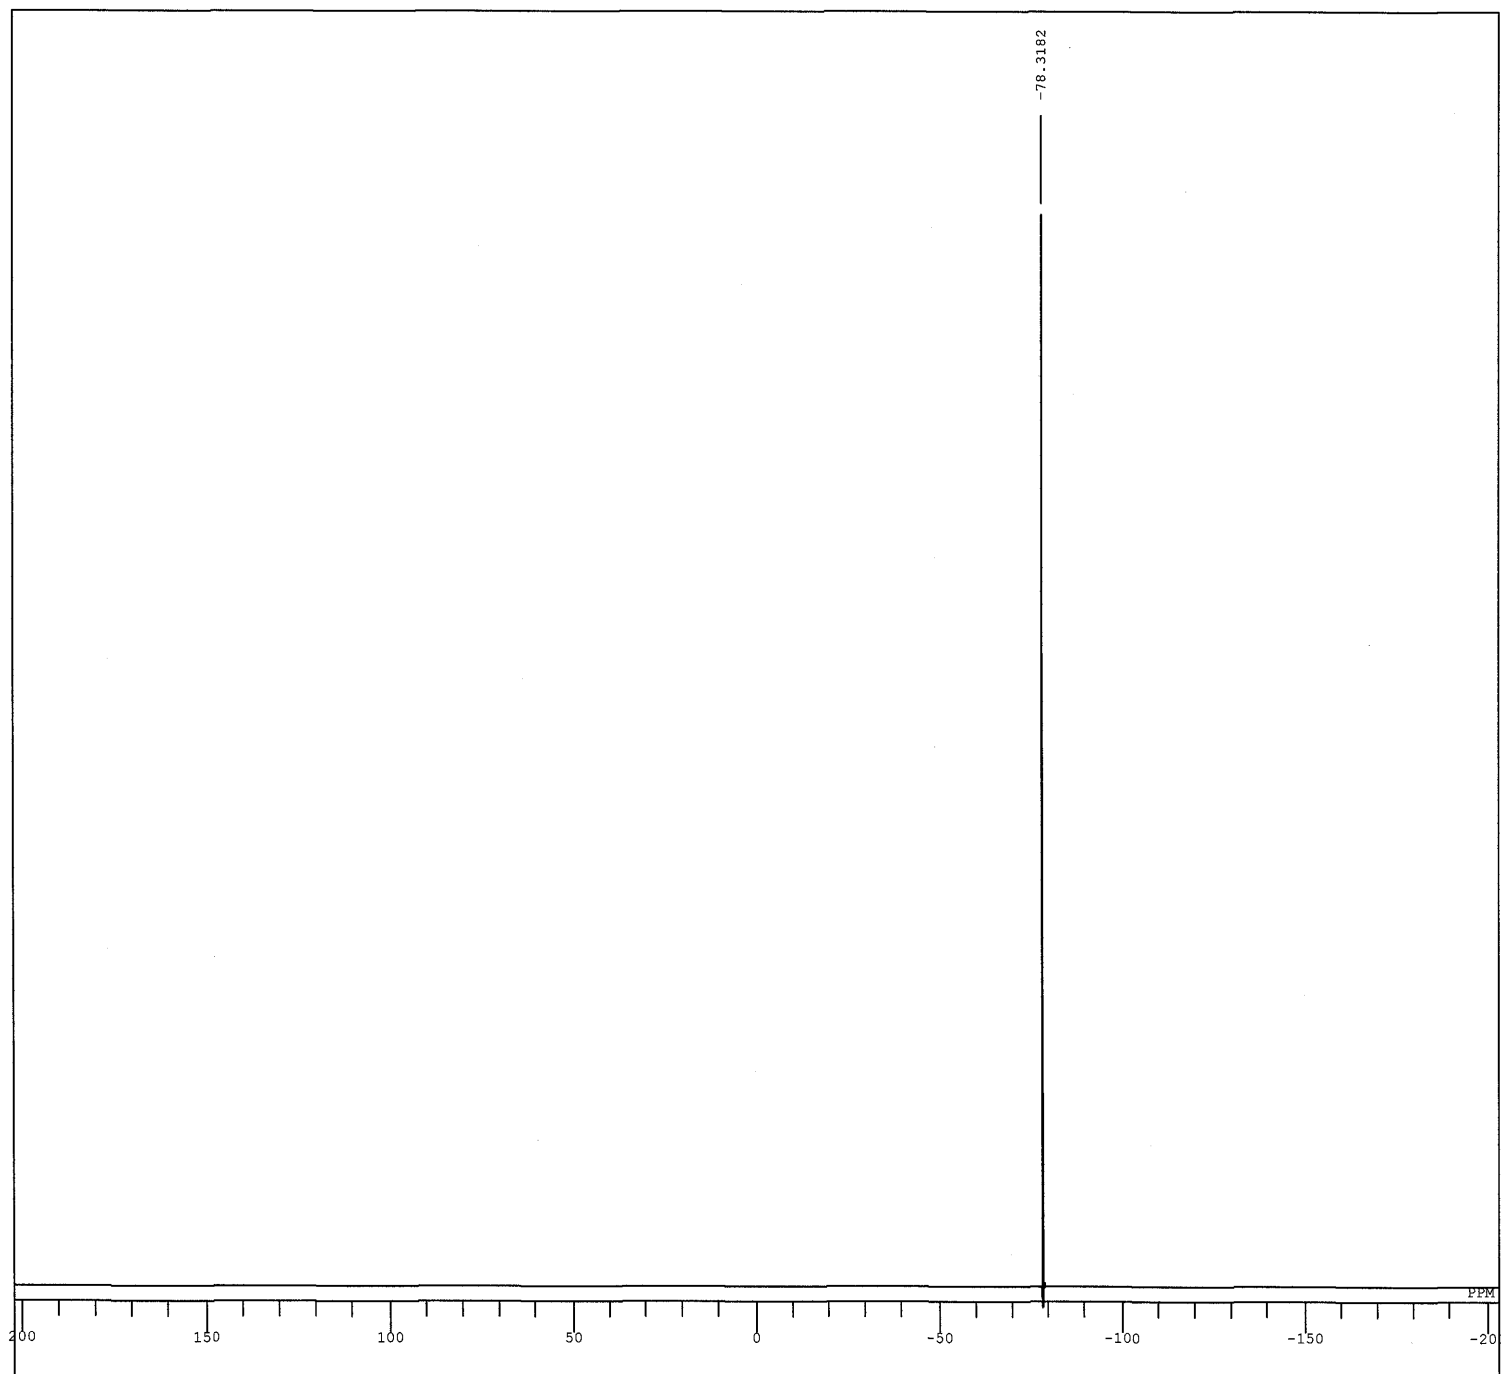

DFILE ozawa03-198\_19F.jdf  
COMNT PhPrOH, OH  
DATIM 29-01-2014 12:48:08  
OBNUC 19F  
EXMOD proton.jxp  
OBFREQ 368.64 MHz  
OBSET 7.63 KHz  
OBFIN 2.85 Hz  
POINT 16384  
FREQU 186567.17 Hz  
SCANS 4  
ACQTM 0.0878 sec  
PD 5.0000 sec  
PW1 3.90 usec  
IRNUC 19F  
CTEMP 20.9 c  
SLVNT CDCL3  
EXREF -164.90 ppm  
BF 0.12 Hz  
RGAIN 42

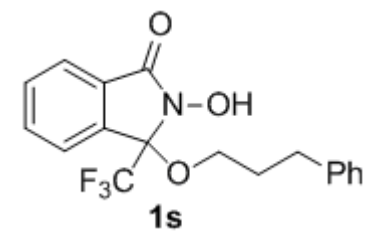

PhPrOH, [O]

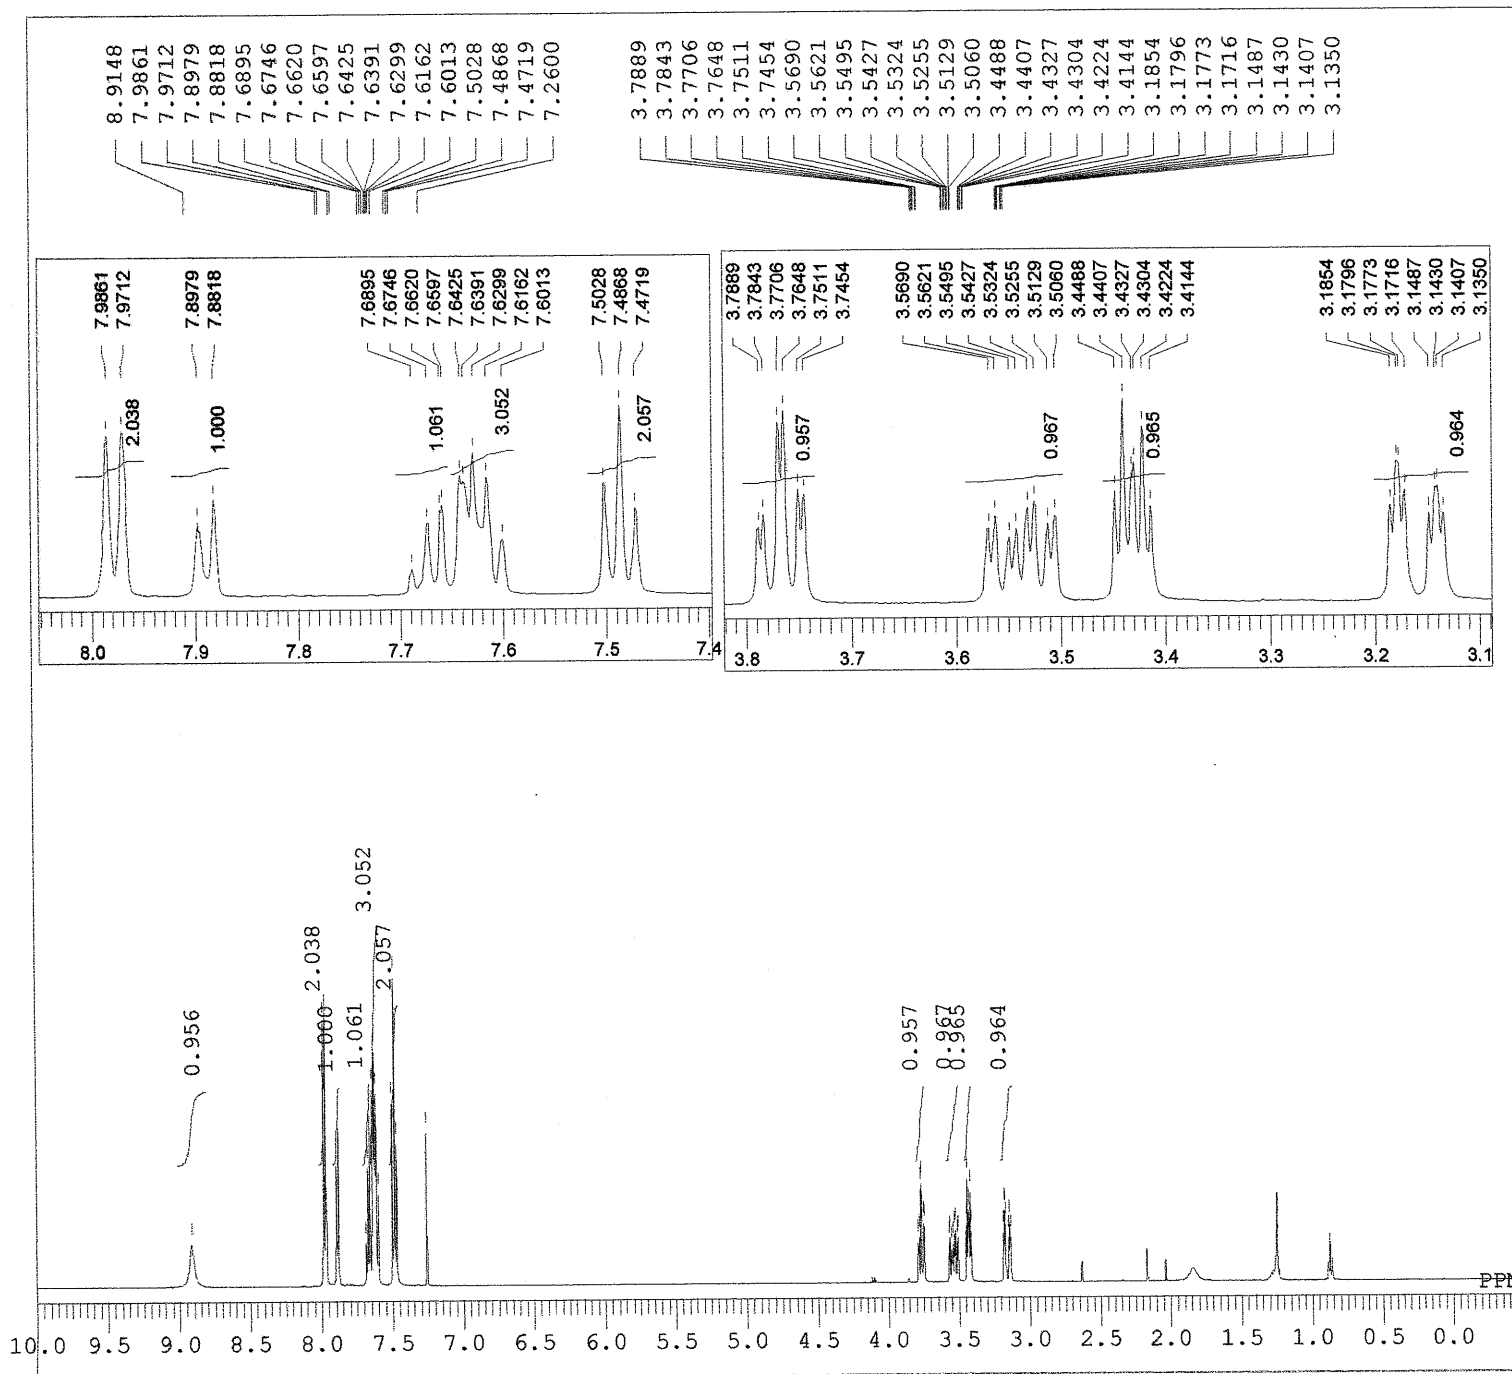

DFILE ozawa04-117\_1h.als  
COMNT PhPrOH, [O]  
DATIM 2014-02-03 22:08:42  
OBNUC 1H  
EXMOD proton.jxp  
OBFRQ 500.16 MHz  
OBSET 2.41 KHz  
OBFIN 6.01 Hz  
POINT 13107  
FREQU 7507.51 Hz  
SCANS 4  
ACQTM 1.7459 sec  
PD 5.0000 sec  
PW1 5.55 usec  
IRNUC 1H  
CTEMP 21.3 c  
SLVNT CDCL3  
EXREF 7.26 ppm  
BF 0.20 Hz  
RGAIN 36

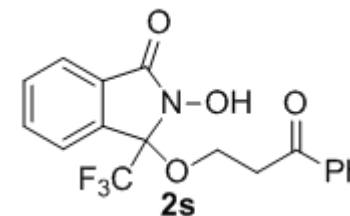



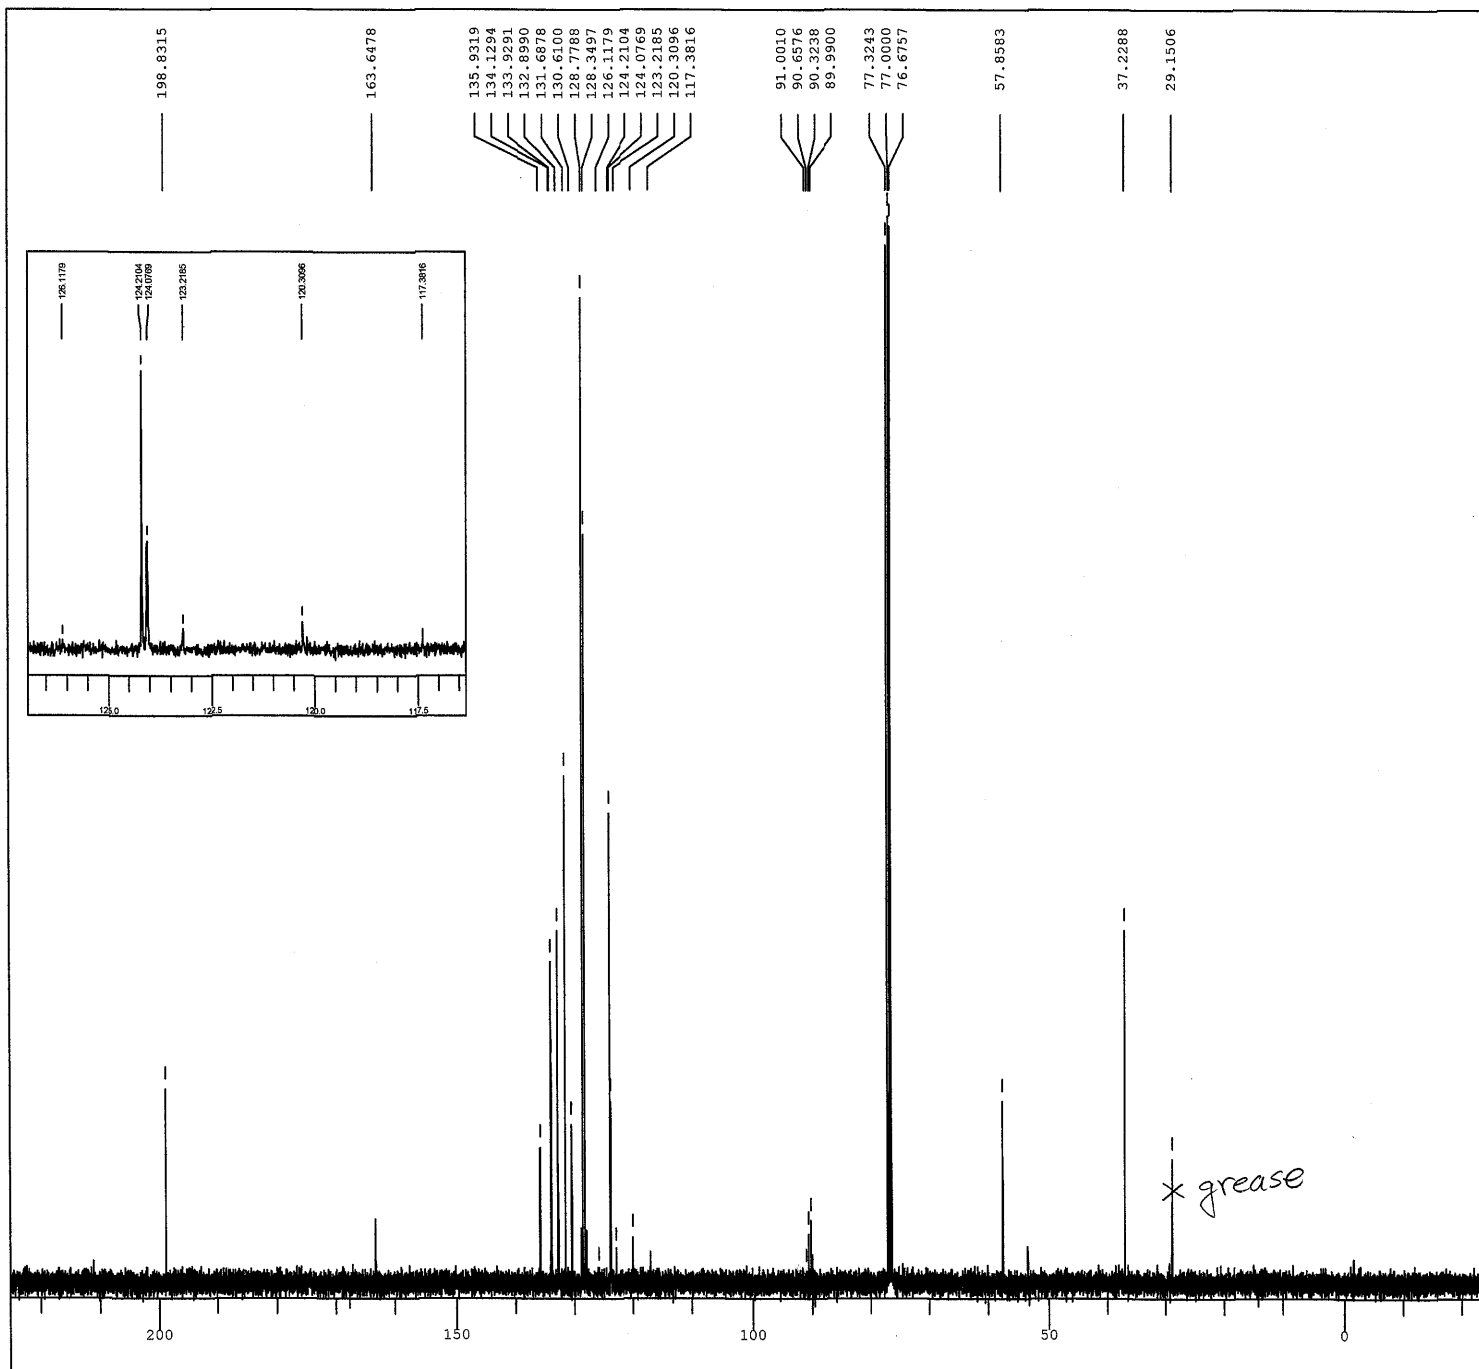

DFILE ozawa04-117.13C.jdf  
 COMNT PhPrOH, [0]  
 DATIM 02-02-2014 20:47:05  
 OBNUC 13C  
 EKMOD carbon.jxp  
 OBFREQ 98.52 MHz  
 OBSET 4.64 KHz  
 OBFIN 8.74 Hz  
 POINT 32767  
 FREQU 30788.18 Hz  
 SCANS 308  
 ACQTM 1.0643 sec  
 PD 3.0000 sec  
 PW1 3.00 usec  
 IRNUC 1H  
 CTEMP 21.2 c  
 SLVNT CDCL3  
 EXREF 77.00 ppm  
 BF 0.12 Hz  
 RGAIN 60

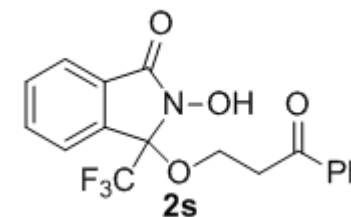

PhPr-01  
PTLC, BuOH, [0]

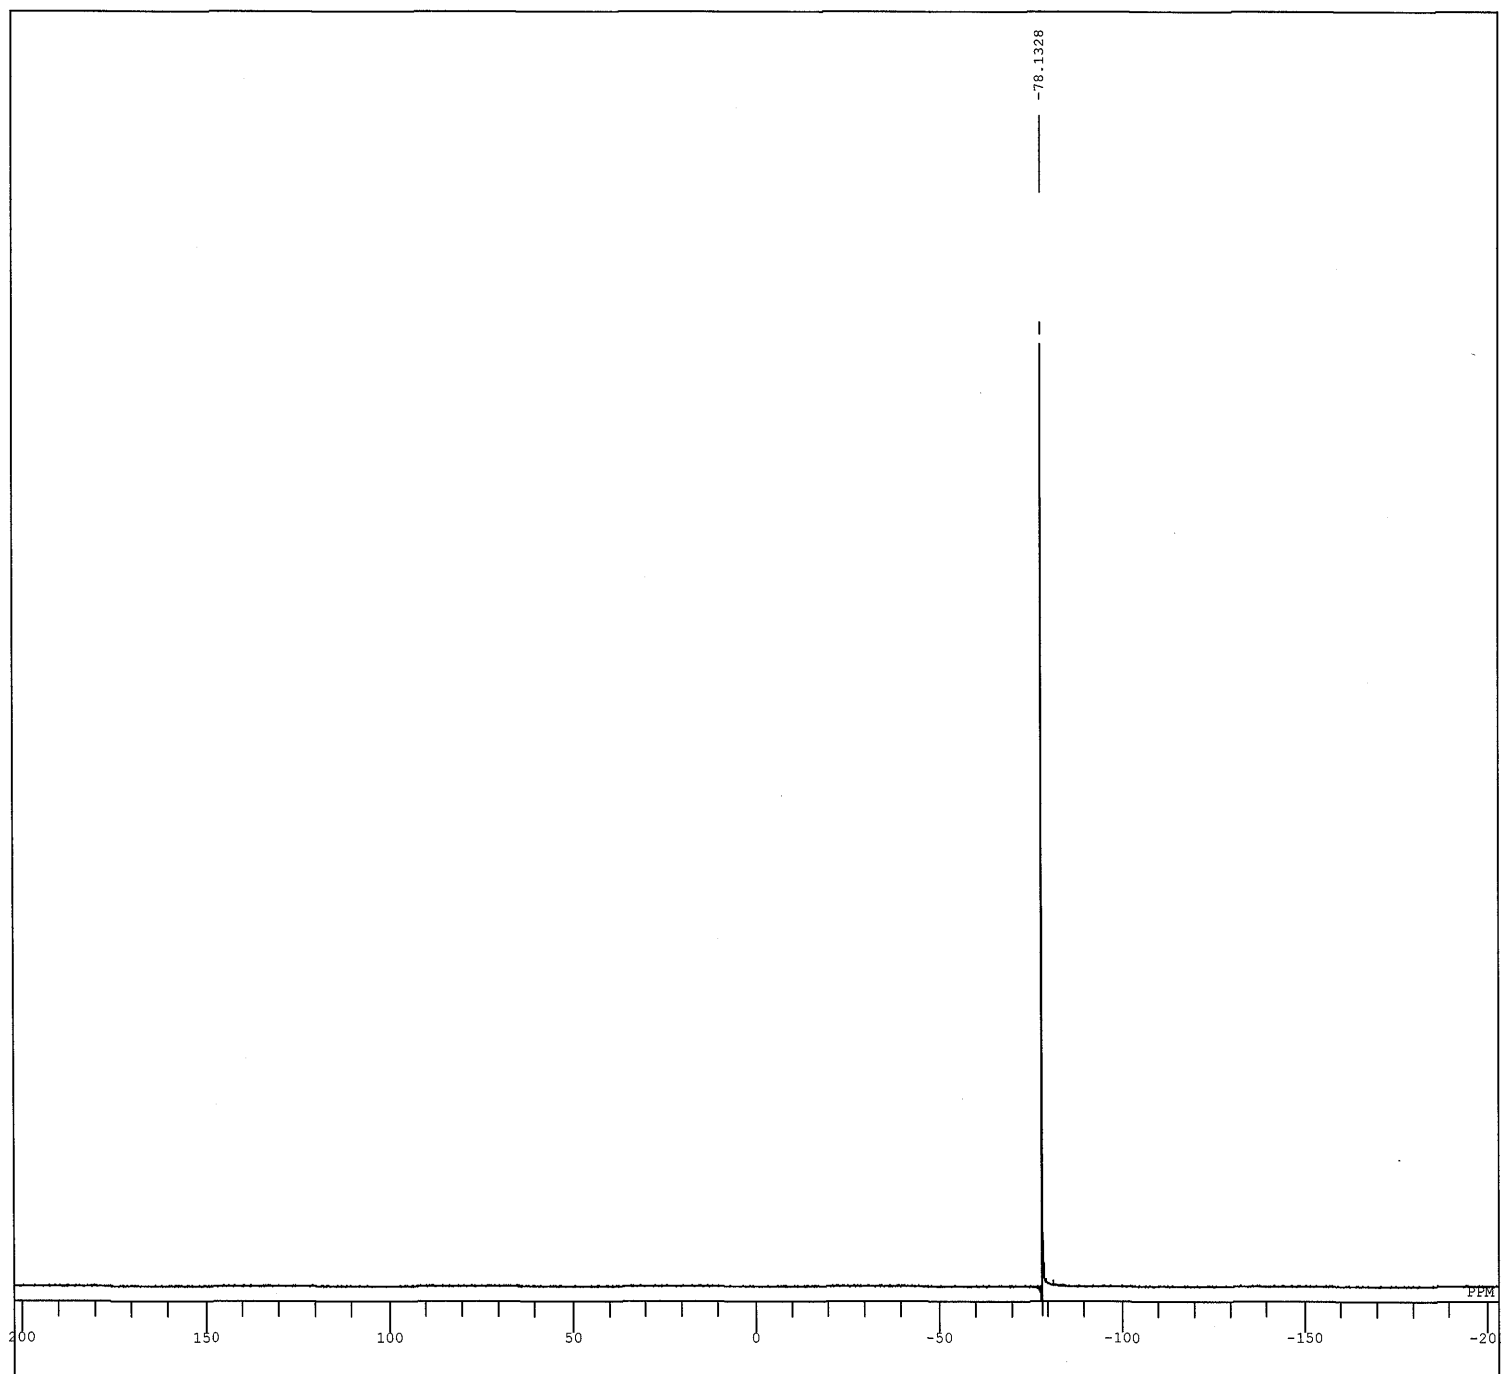

DFILE ozawa04-109\_2\_19F.jdf  
COMNT PTLC, BuOH, [0]  
DATIM 24-01-2014-21:00:10  
OBNUC 19F  
EXMOD proton.jxp  
OBFRQ 368.64 MHz  
OBSET 7.63 KHz  
OBFIN 2.85 Hz  
POINT 16384  
FREQU 186567.17 Hz  
SCANS 4  
ACQTM 0.0878 sec  
PD 5.0000 sec  
PW1 3.90 usec  
IRNUC 19F  
CTEMP 21.0 c  
SLVNT CDCL3  
EXREF -164.90 ppm  
BF 0.12 Hz  
RGAIN 46

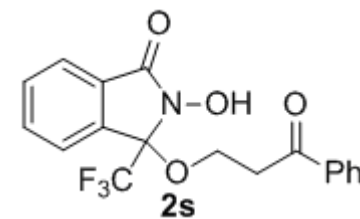

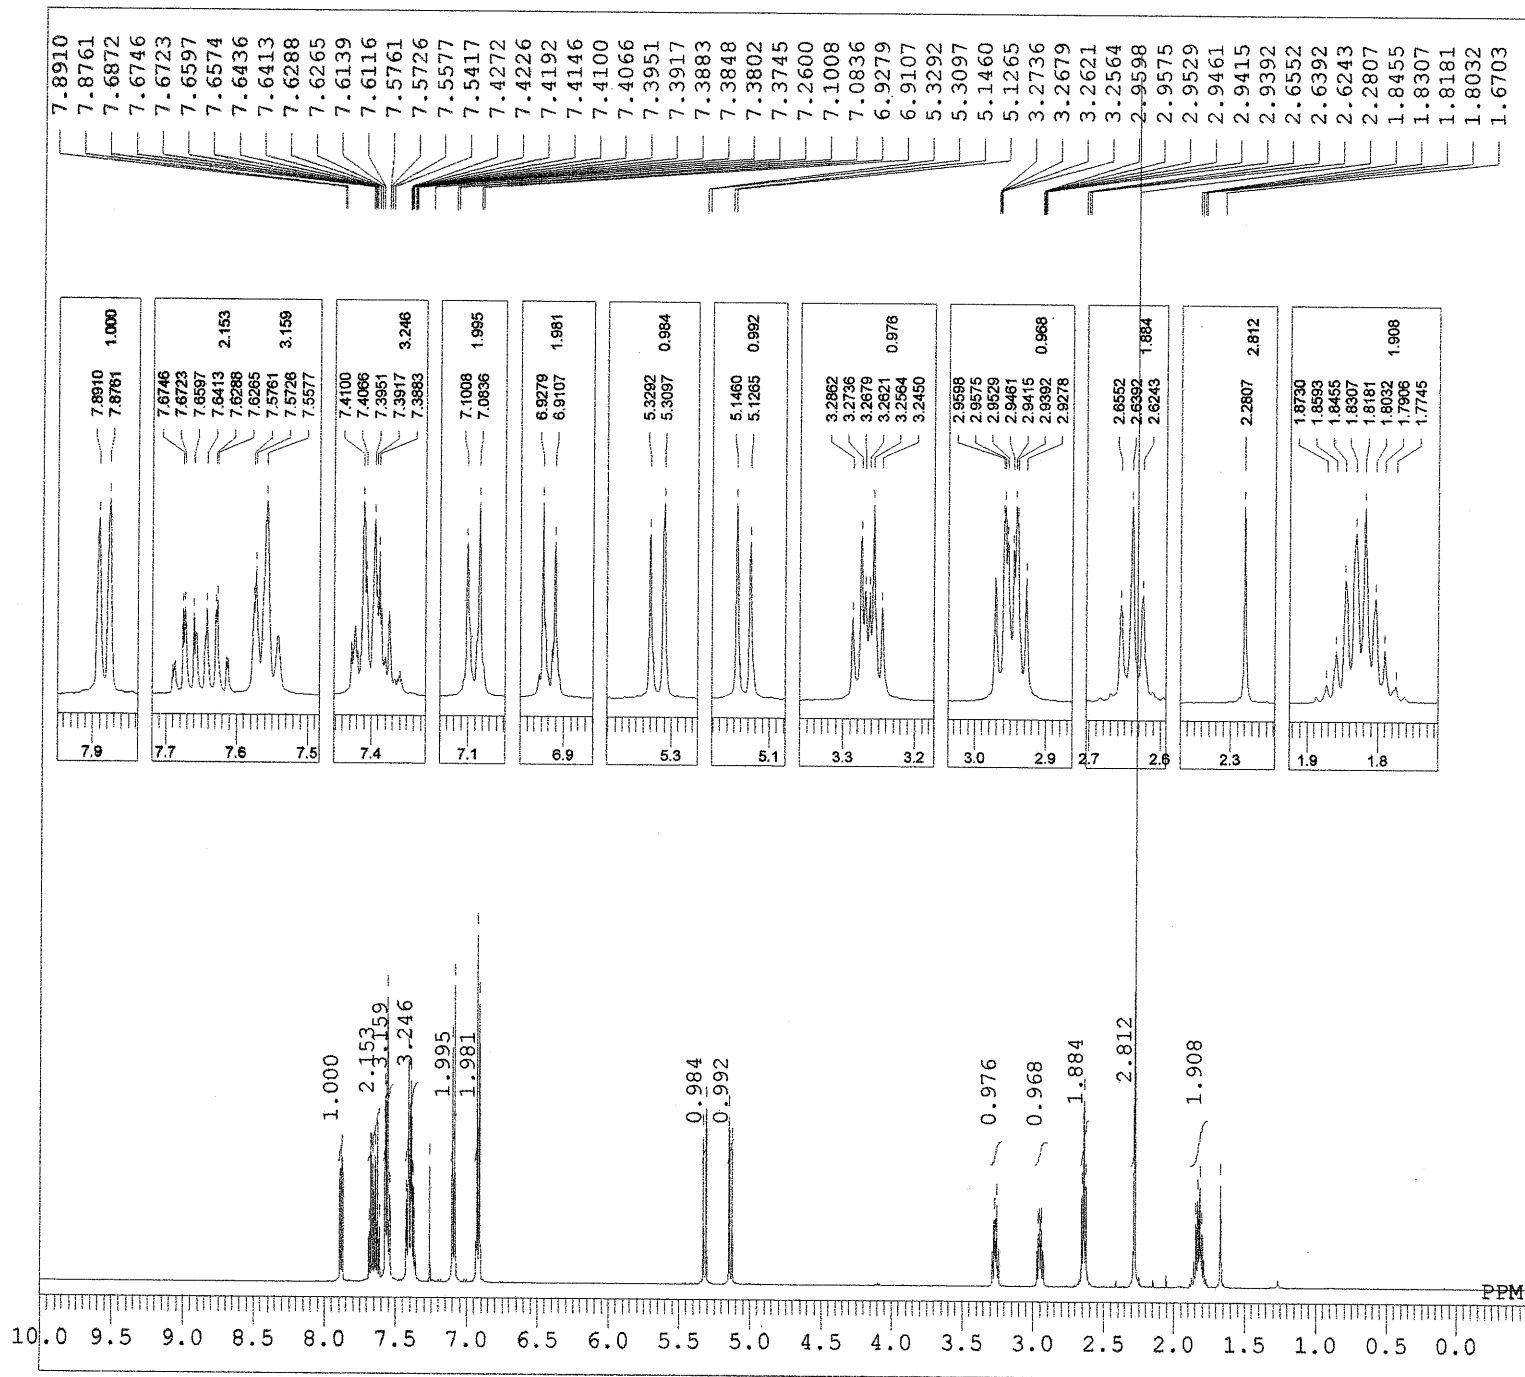

```

DFILE  ozawa05-048_1H.jdf
COMNT  PhOAc, Bn
DATIM  2014-08-15 13:12:30
OBNUC  1H
EXMOD  proton.jxp
OBFRQ   500.16 MHz
OBSET   2.41 KHz
OBFIN   6.01 Hz
POINT   16384
FREQU   9384.38 Hz
SCANS   4
ACQTM   1.7459 sec
PD      5.0000 sec
PW1     5.55 usec
IRNUC   1H
CTEMP   26.0 c
SLVNT   CDCL3
EXREF   7.26 ppm
BF      0.12 Hz
RGAIN   32
  
```

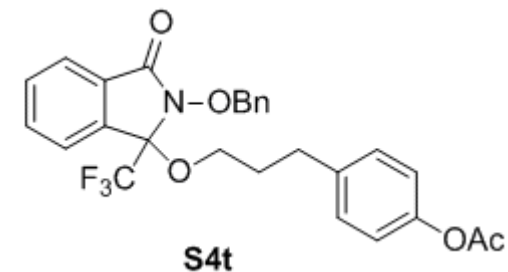

PhOAc, Bn

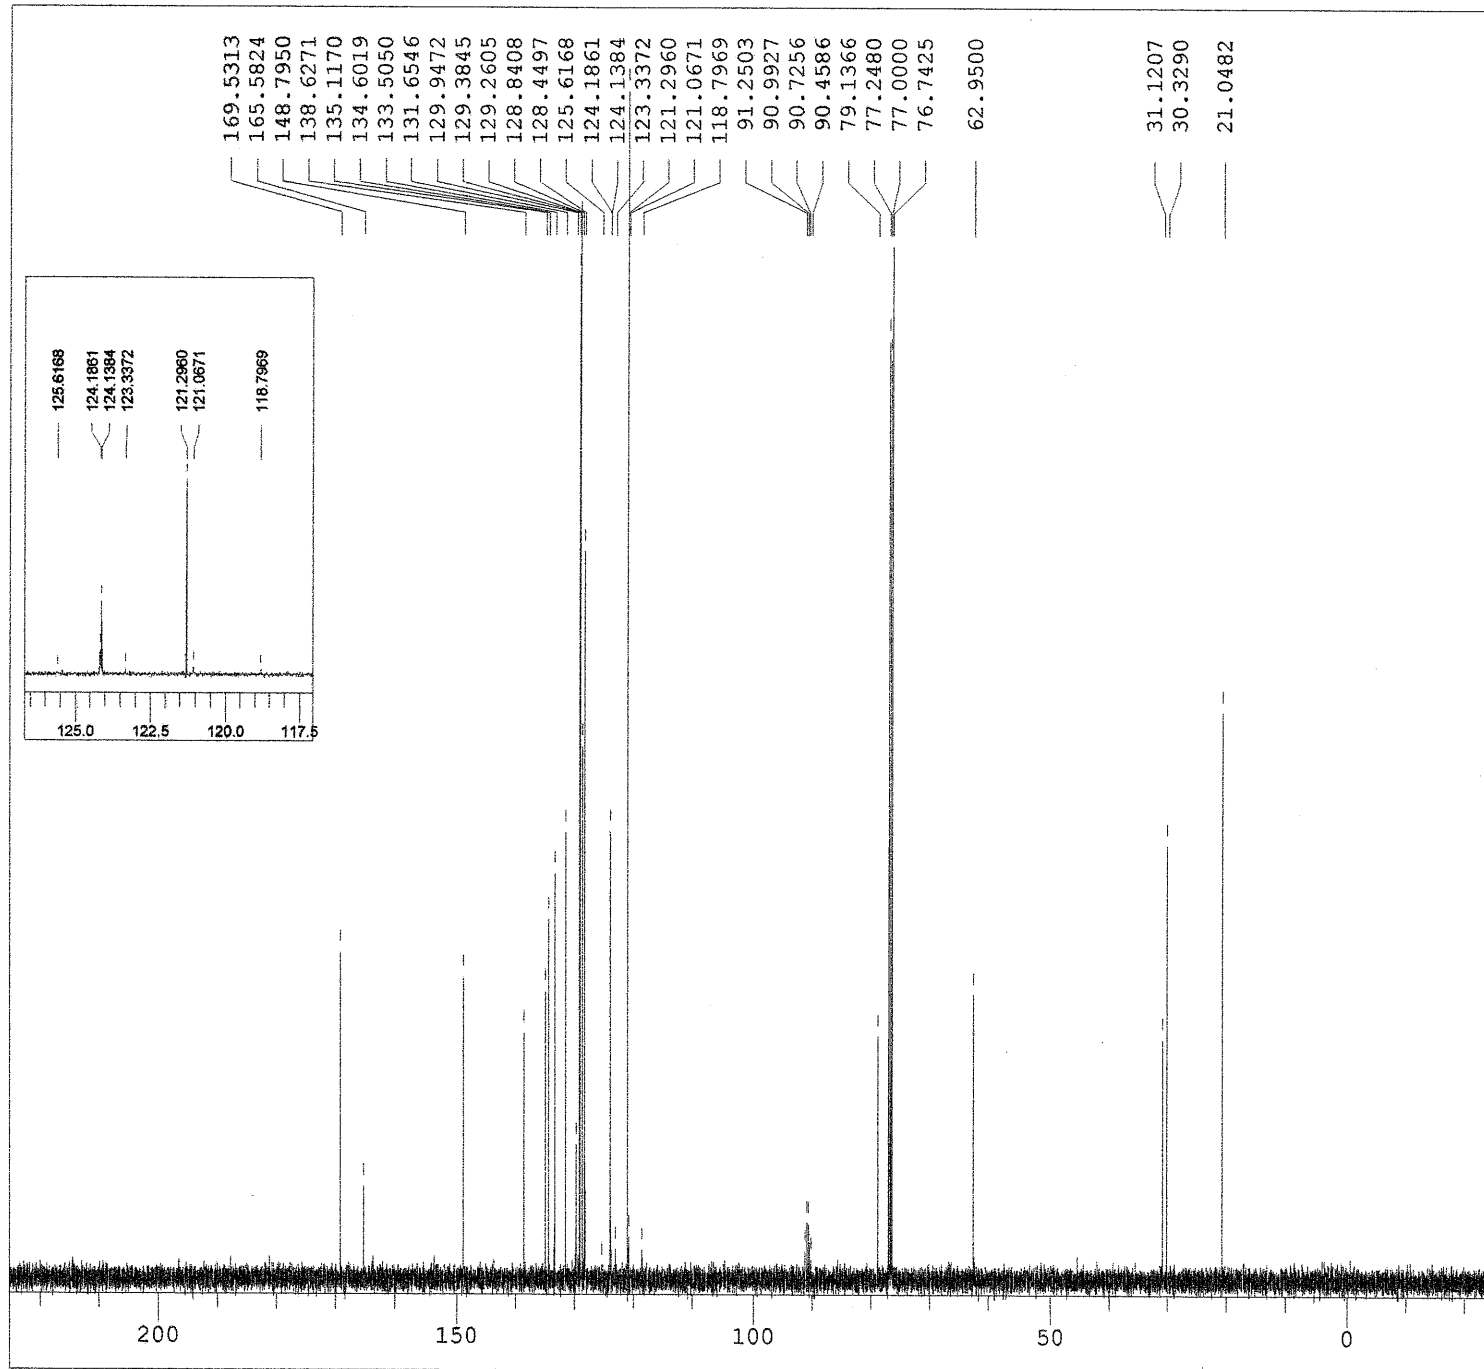

DFILE ozawa05-048\_13C.jdf  
COMNT PhOAc, Bn  
DATIM 2014-08-15 13:13:33  
OBNUC 13C  
EXMOD carbon.jxp  
OBFRQ 125.77 MHz  
OBSET 7.87 KHz  
OBFIN 4.21 Hz  
POINT 32767  
FREQU 39308.18 Hz  
SCANS 180  
ACQTM 0.8336 sec  
PD 3.0000 sec  
PW1 3.40 usec  
IRNUC 1H  
CTEMP 26.4 c  
SLVNT CDCL3  
EXREF 77.00 ppm  
BF 0.12 Hz  
RGAIN 60

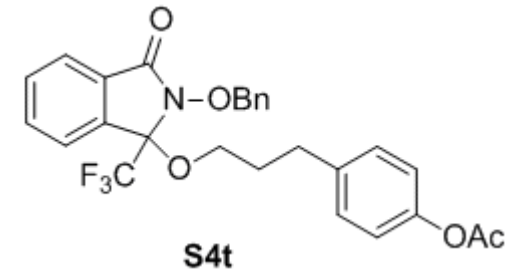

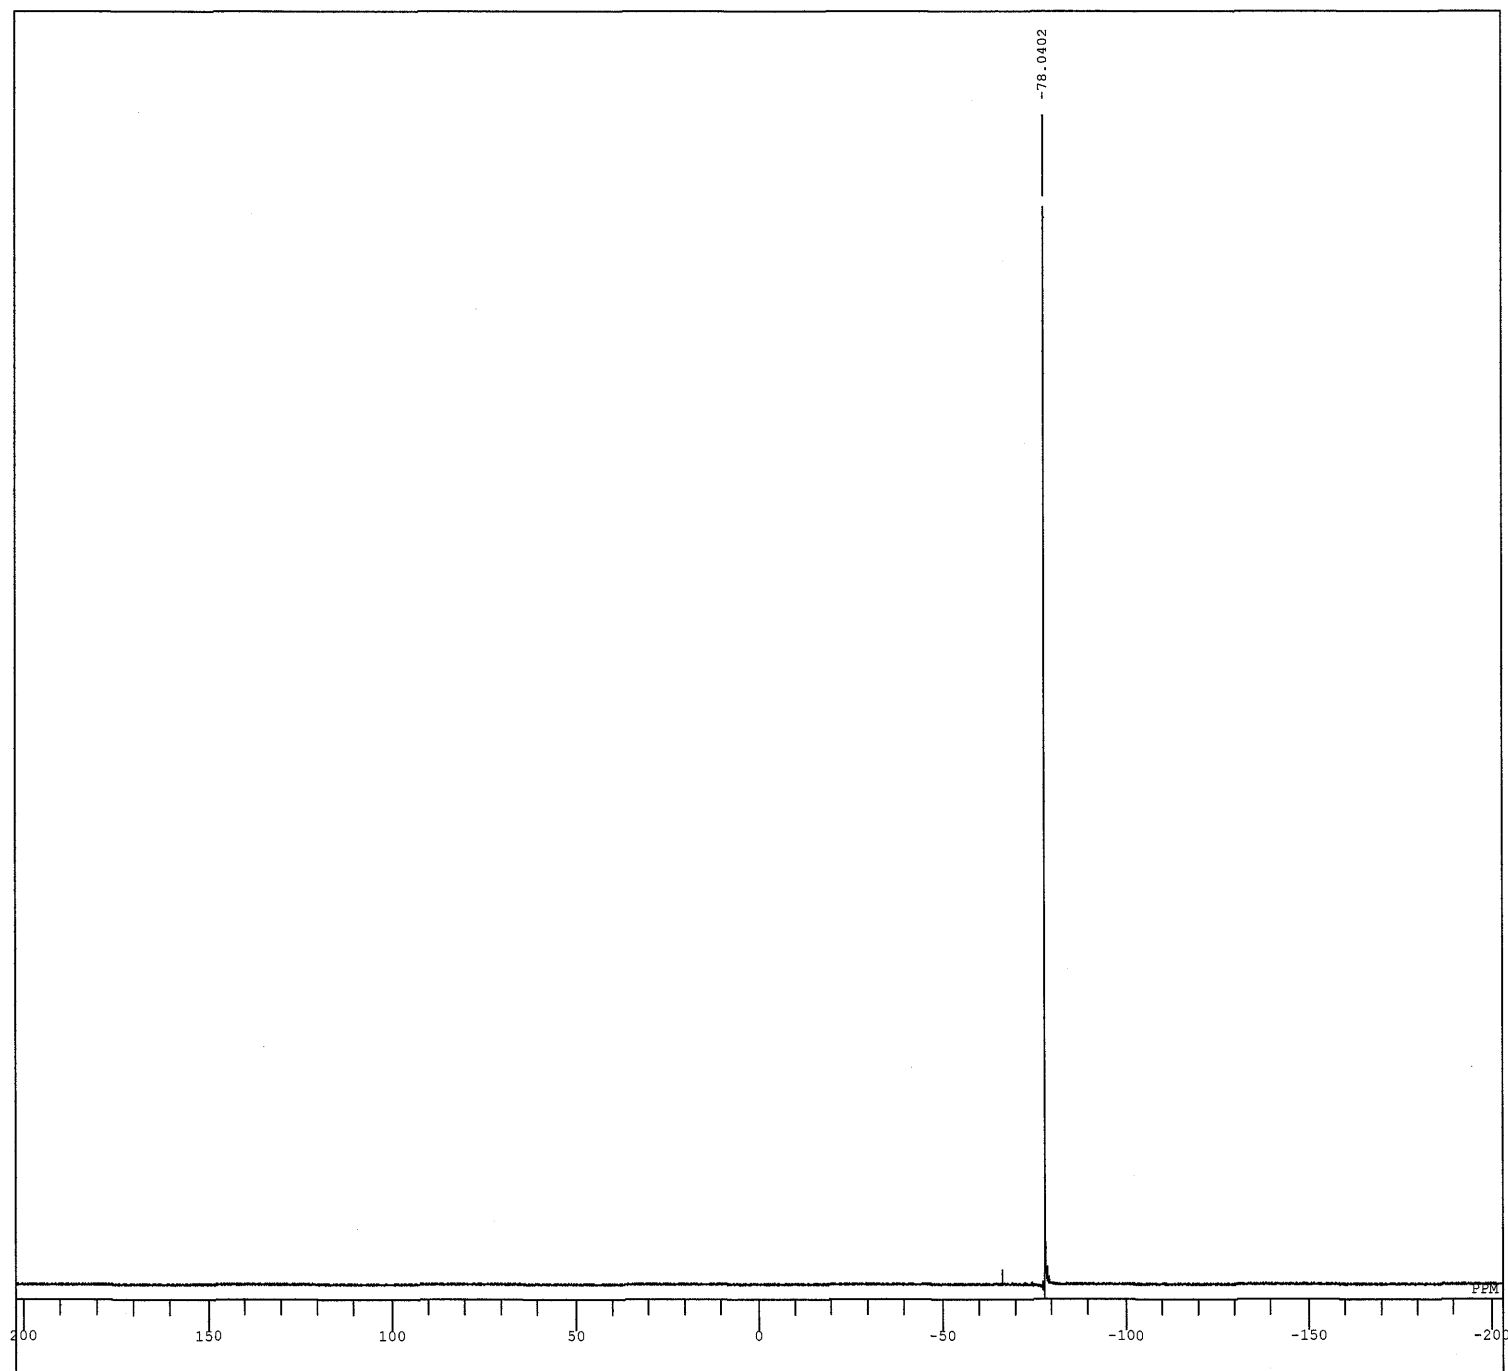

DFILE ozawa05-048\_19F.jdf  
COMNT PhOAc, Bn  
DATIM 15-08-2014 13:57:18  
OBNUC 19F  
EXMOD proton.jxp  
OBFREQ 368.64 MHz  
OBSETE 7.63 KHz  
OBFIN 2.85 Hz  
POINT 16384  
FREQU 186567.17 Hz  
SCANS 4  
ACQTM 0.0878 sec  
PD 5.0000 sec  
PWL 3.90 usec  
IRNUC 19F  
CTEMP 24.2 c  
SLVNT CDCL3  
EXREF -164.90 ppm  
BF 0.12 Hz  
RGAIN 50

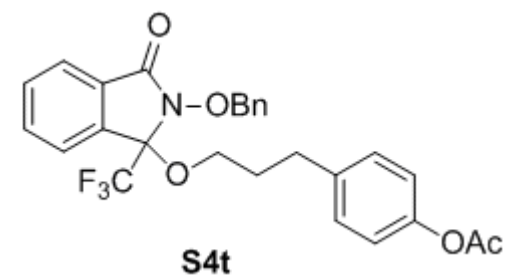

PhOAc

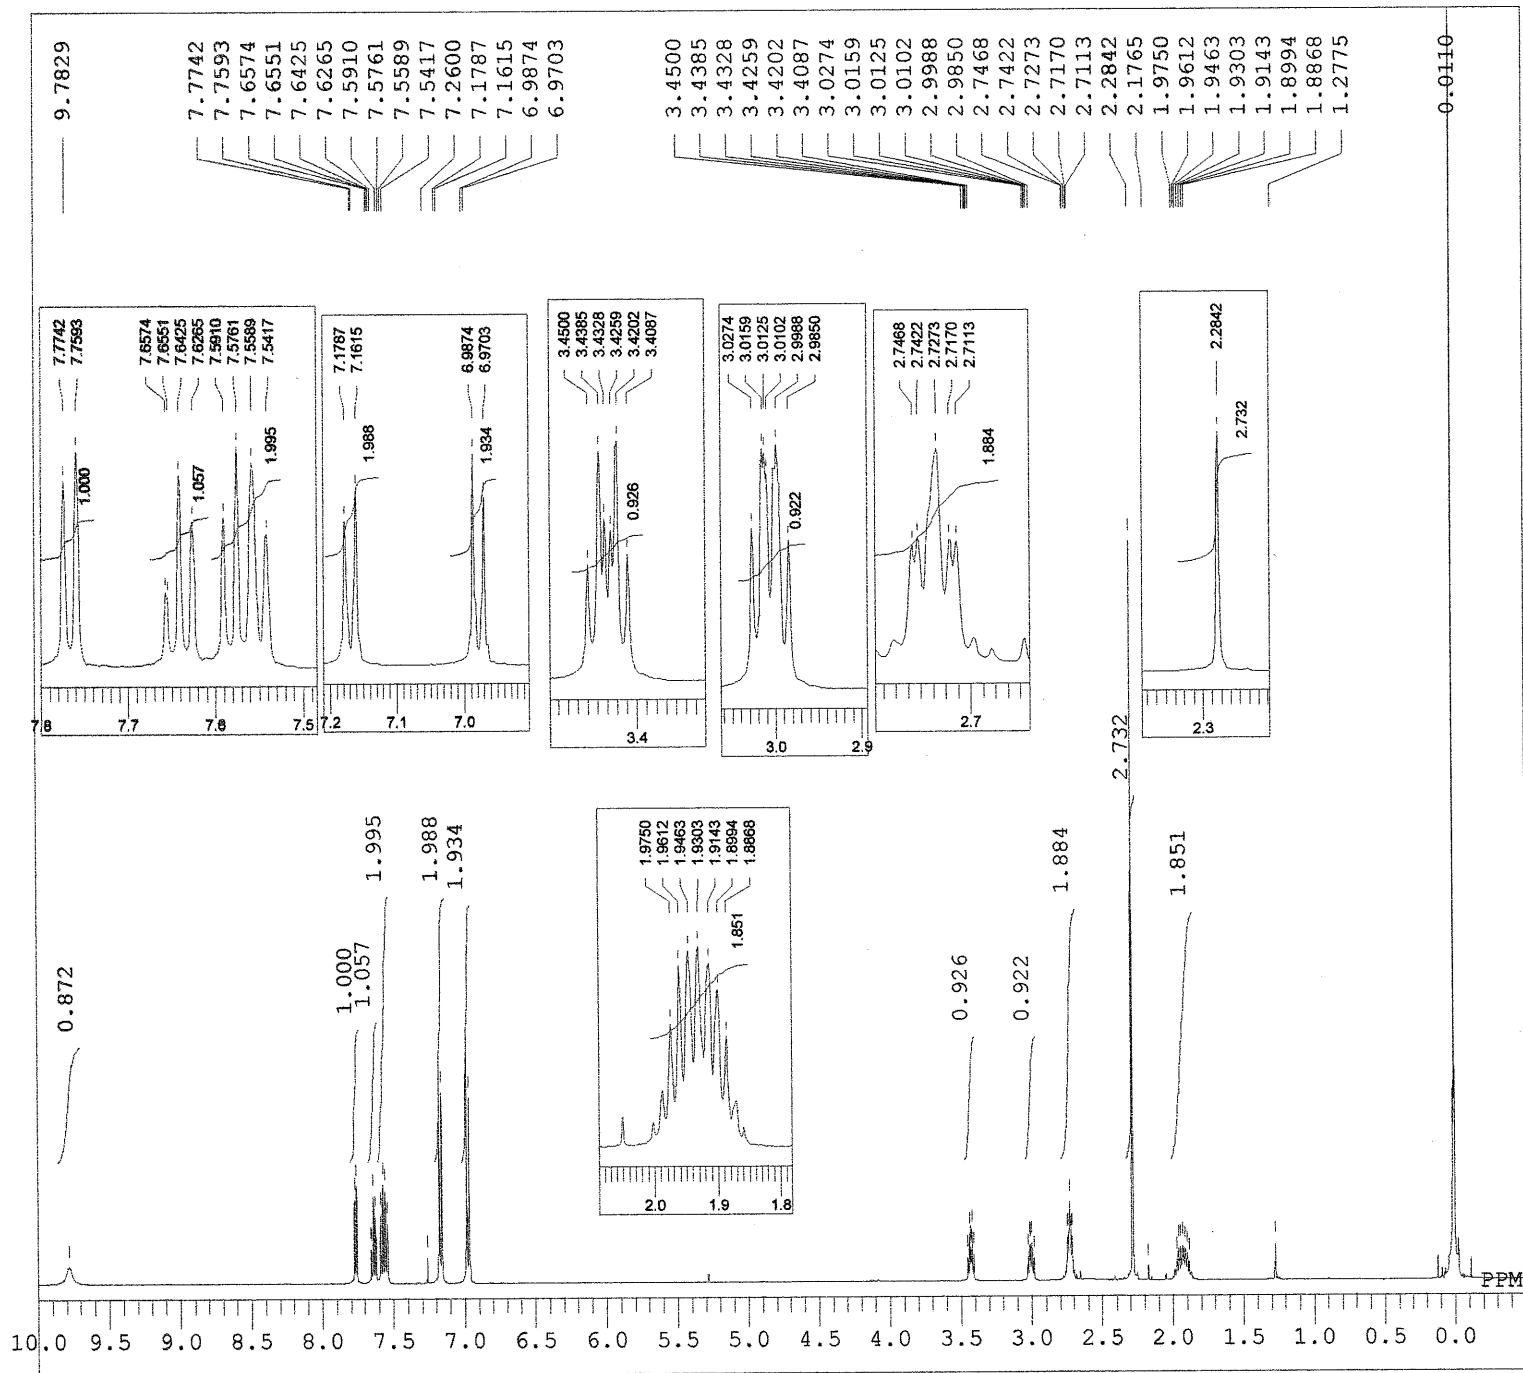

DFILE ozawa05-054\_1h.jdf  
COMNT PhOAc  
DATIM 2014-06-14 13:17:60  
OBNUC 1H  
EXMOD proton.jxp  
OBFRQ 500.16 MHz  
OBSET 2.41 KHz  
OBFIN 6.01 Hz  
POINT 16384  
FREQU 9384.38 Hz  
SCANS 4  
ACQTM 1.7459 sec  
PD 5.0000 sec  
PW1 5.55 usec  
IRNUC 1H  
CTEMP 25.4 c  
SLVNT CDCL3  
EXREF 7.26 ppm  
BF 0.12 Hz  
RGAIN 26

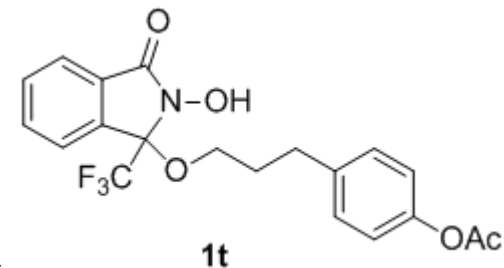

PhOAc

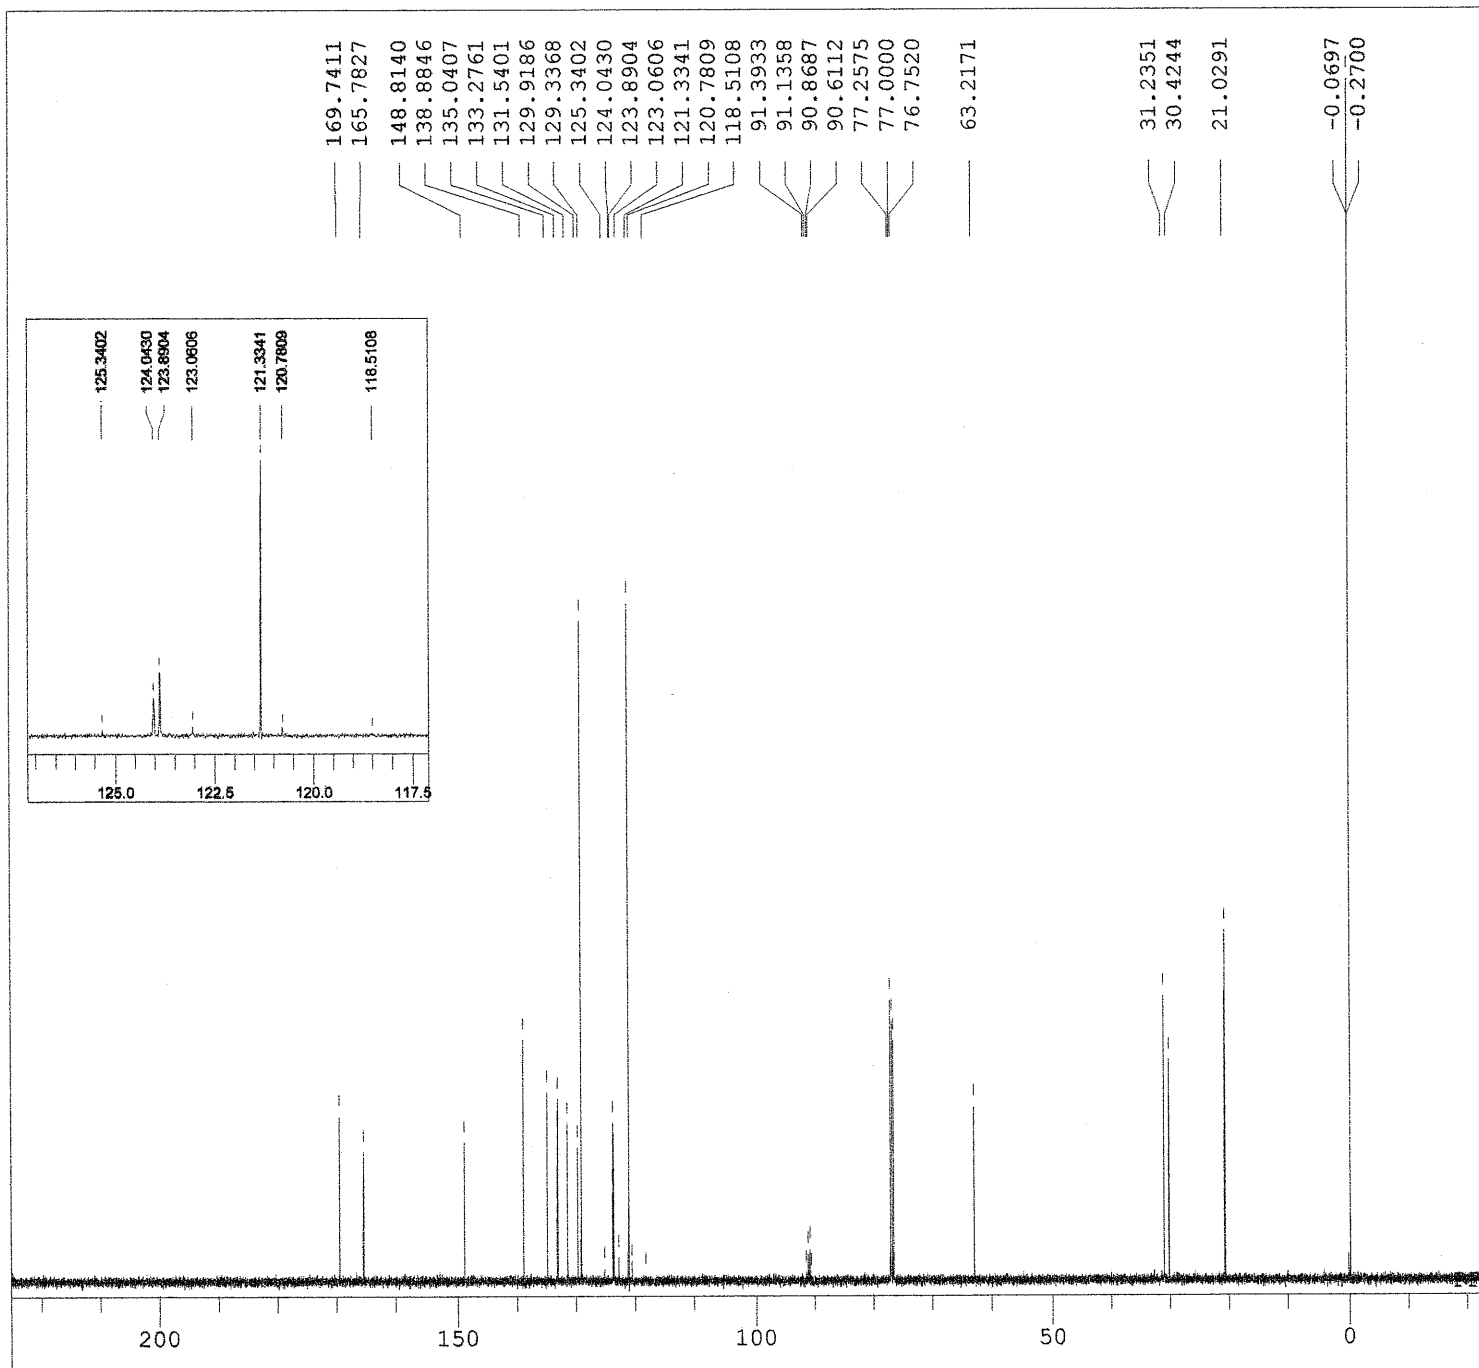

DFILE ozawa05-054\_13C.jdf  
COMNT PhOAc  
DATIM 2014-06-14 13:19:03  
OBNUC 13C  
EXMOD carbon.jxp  
OBFRQ 125.77 MHz  
OBSET 7.87 KHz  
OBFIN 4.21 Hz  
POINT 32767  
FREQU 39308.18 Hz  
SCANS 108  
ACQTM 0.8336 sec  
PD 3.0000 sec  
PW1 3.40 usec  
IRNUC 1H  
CTEMP 26.0 c  
SLVNT CDCL3  
EXREF 77.00 ppm  
BF 0.12 Hz  
RGAIN 60

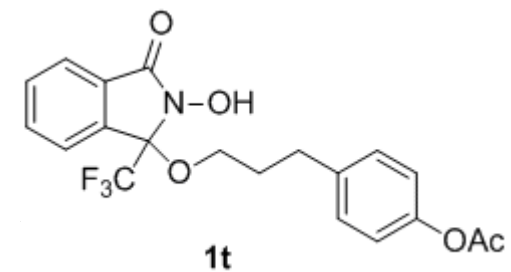

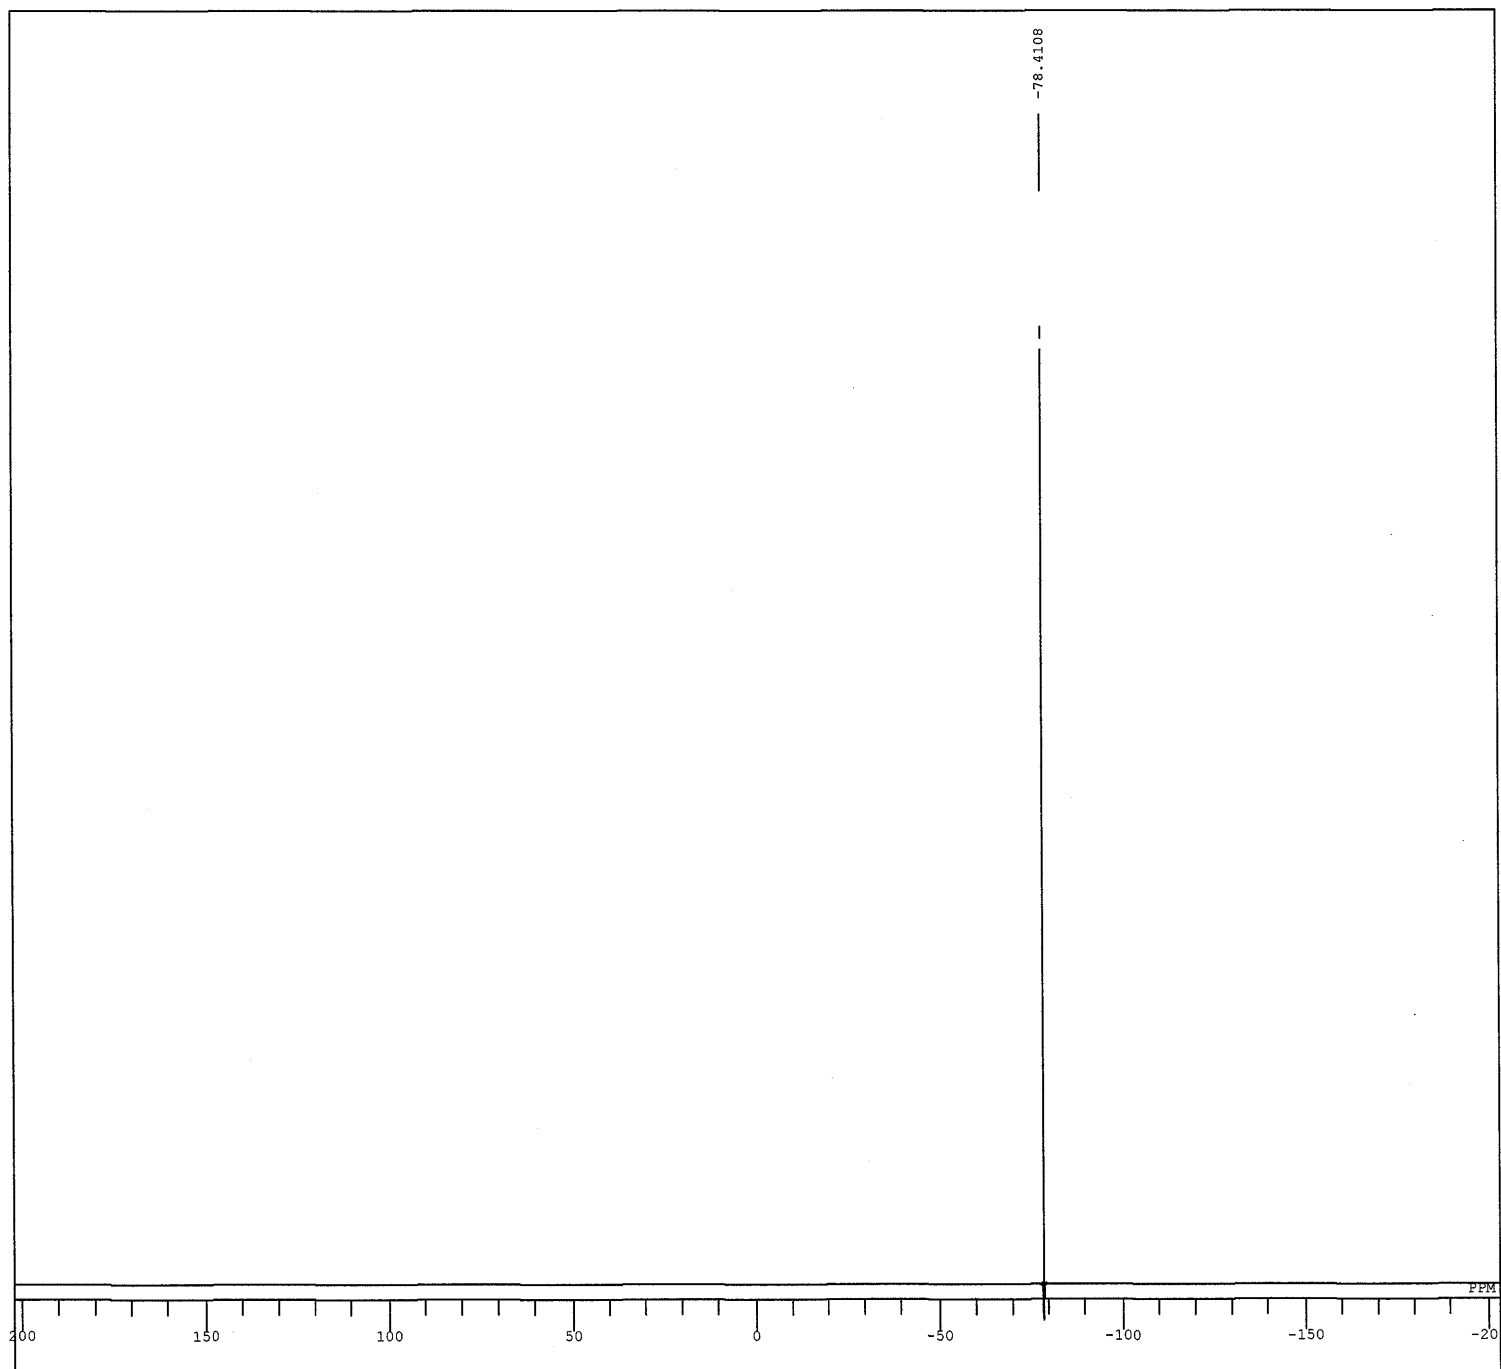

```
DFILE ozawa05-054_19F.jdf
COMNT Ph-OAc
DATIM 14-06-2014 14:44:50
OBNUC 19F
EXMOD proton.jxp
OBFRQ 368.64 MHz
OBSET 7.63 KHz
OBFIN 2.85 Hz
POINT 16384
FREQU 186567.17 Hz
SCANS 4
ACQTM 0.0878 sec
PD 5.0000 sec
PW1 3.90 usec
IRNUC 19F
CTEMP 23.5 c
SLVNT CDCL3
EXREF -164.90 ppm
BF 0.12 Hz
RGAIN 50
```

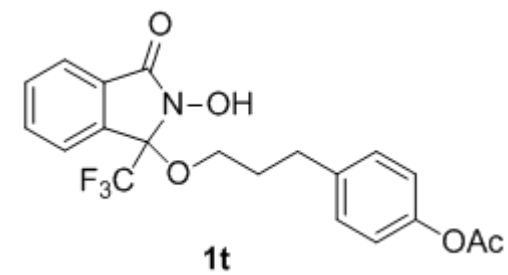



PhOAc, [0]

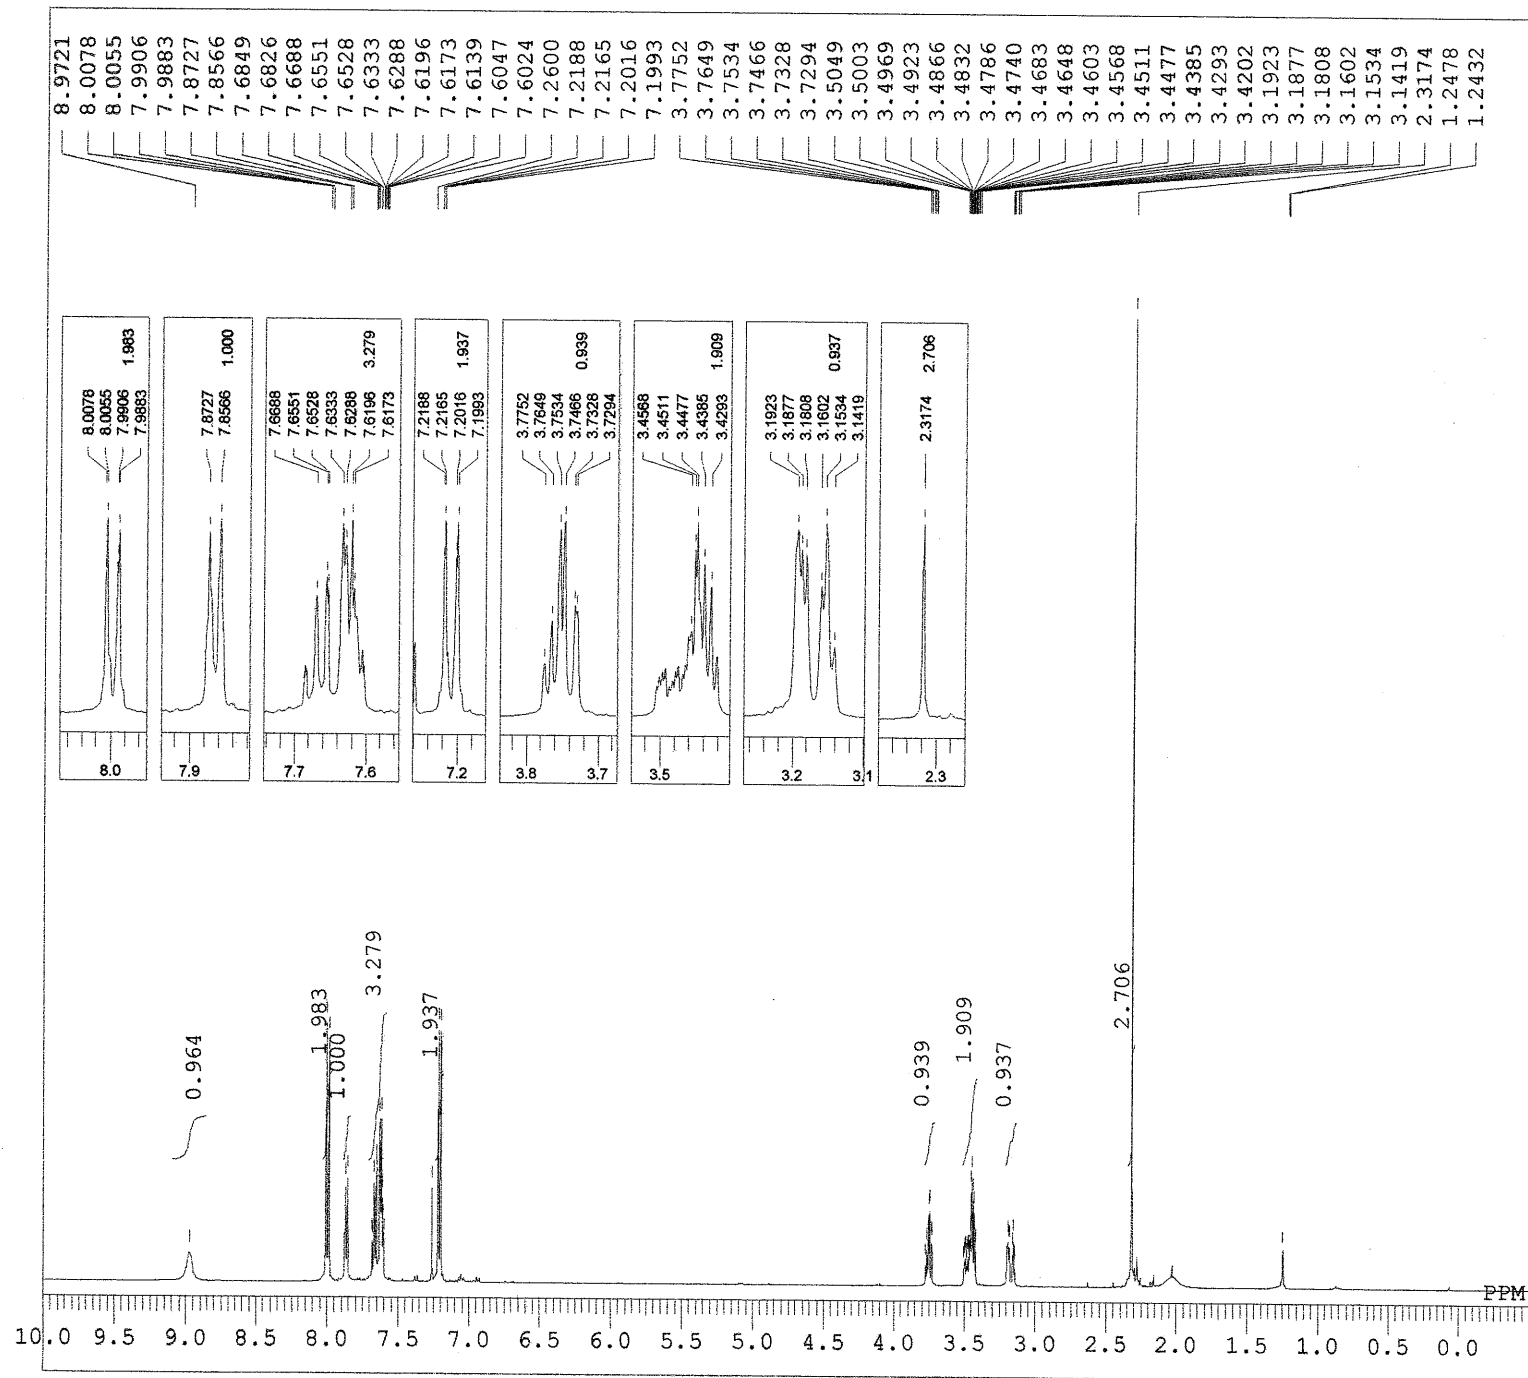

DFILE ozawa05-095\_1\_1H.jdf  
COMNT PhOAc, [0]  
DATIM 2014-08-16 12:54:38  
OBNUC 1H  
EXMOD proton.jxp  
OBFRQ 500.16 MHz  
OBSET 2.41 KHz  
OBFIN 6.01 Hz  
POINT 16384  
FREQU 9384.38 Hz  
SCANS 4  
ACQTM 1.7459 sec  
PD 5.0000 sec  
PW1 5.55 usec  
IRNUC 1H  
CTEMP 25.9 c  
SLVNT CDCL3  
EXREF 7.26 ppm  
BF 0.12 Hz  
RGAIN 34

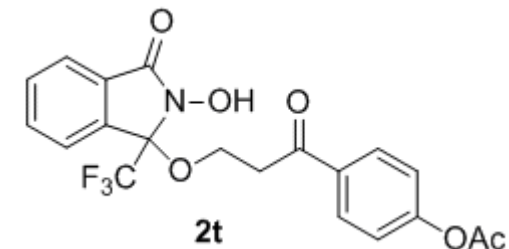

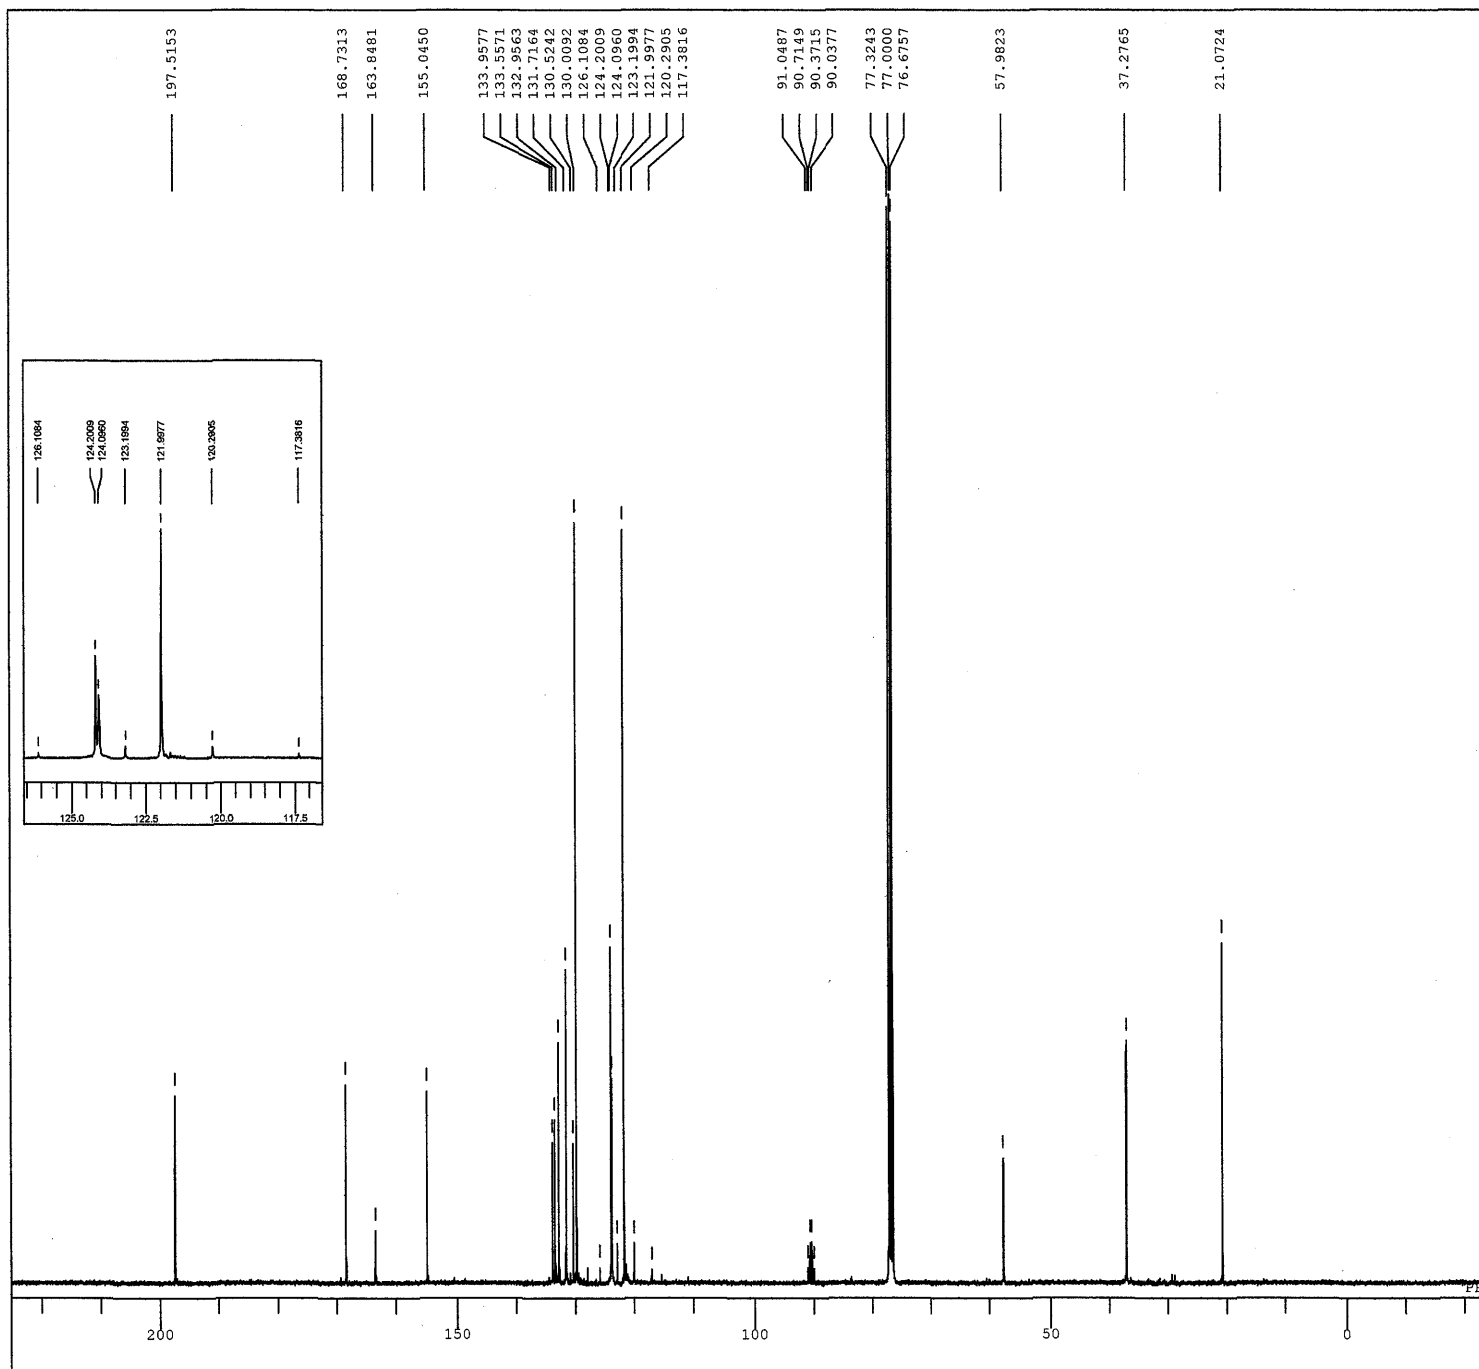

DFILE ozawa05-095\_1\_13C.jdf  
 COMNT PhOAc, [0]  
 DATIM 15-08-2014 22:46:13  
 OBNUC 13C  
 EMMOD carbon.jxp  
 OBFRO 98.52 MHz  
 OBSET 4.64 KHz  
 OBFIN 8.74 Hz  
 POINT 32767  
 FREQU 30788.18 Hz  
 SCANS 10000  
 ACQTM 1.0643 sec  
 PD 3.0000 sec  
 PW1 3.00 usec  
 IRNUC 1H  
 CTEMP 24.4 c  
 SLVNT CDCL3  
 EXREF 77.00 ppm  
 BF 1.20 Hz  
 RGAIN 60

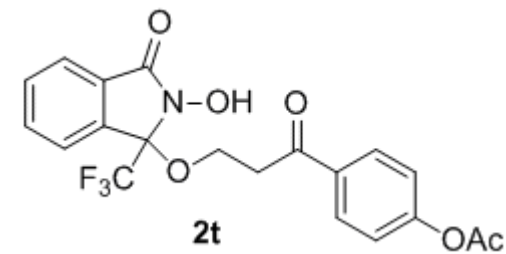

PhOAc, [0]

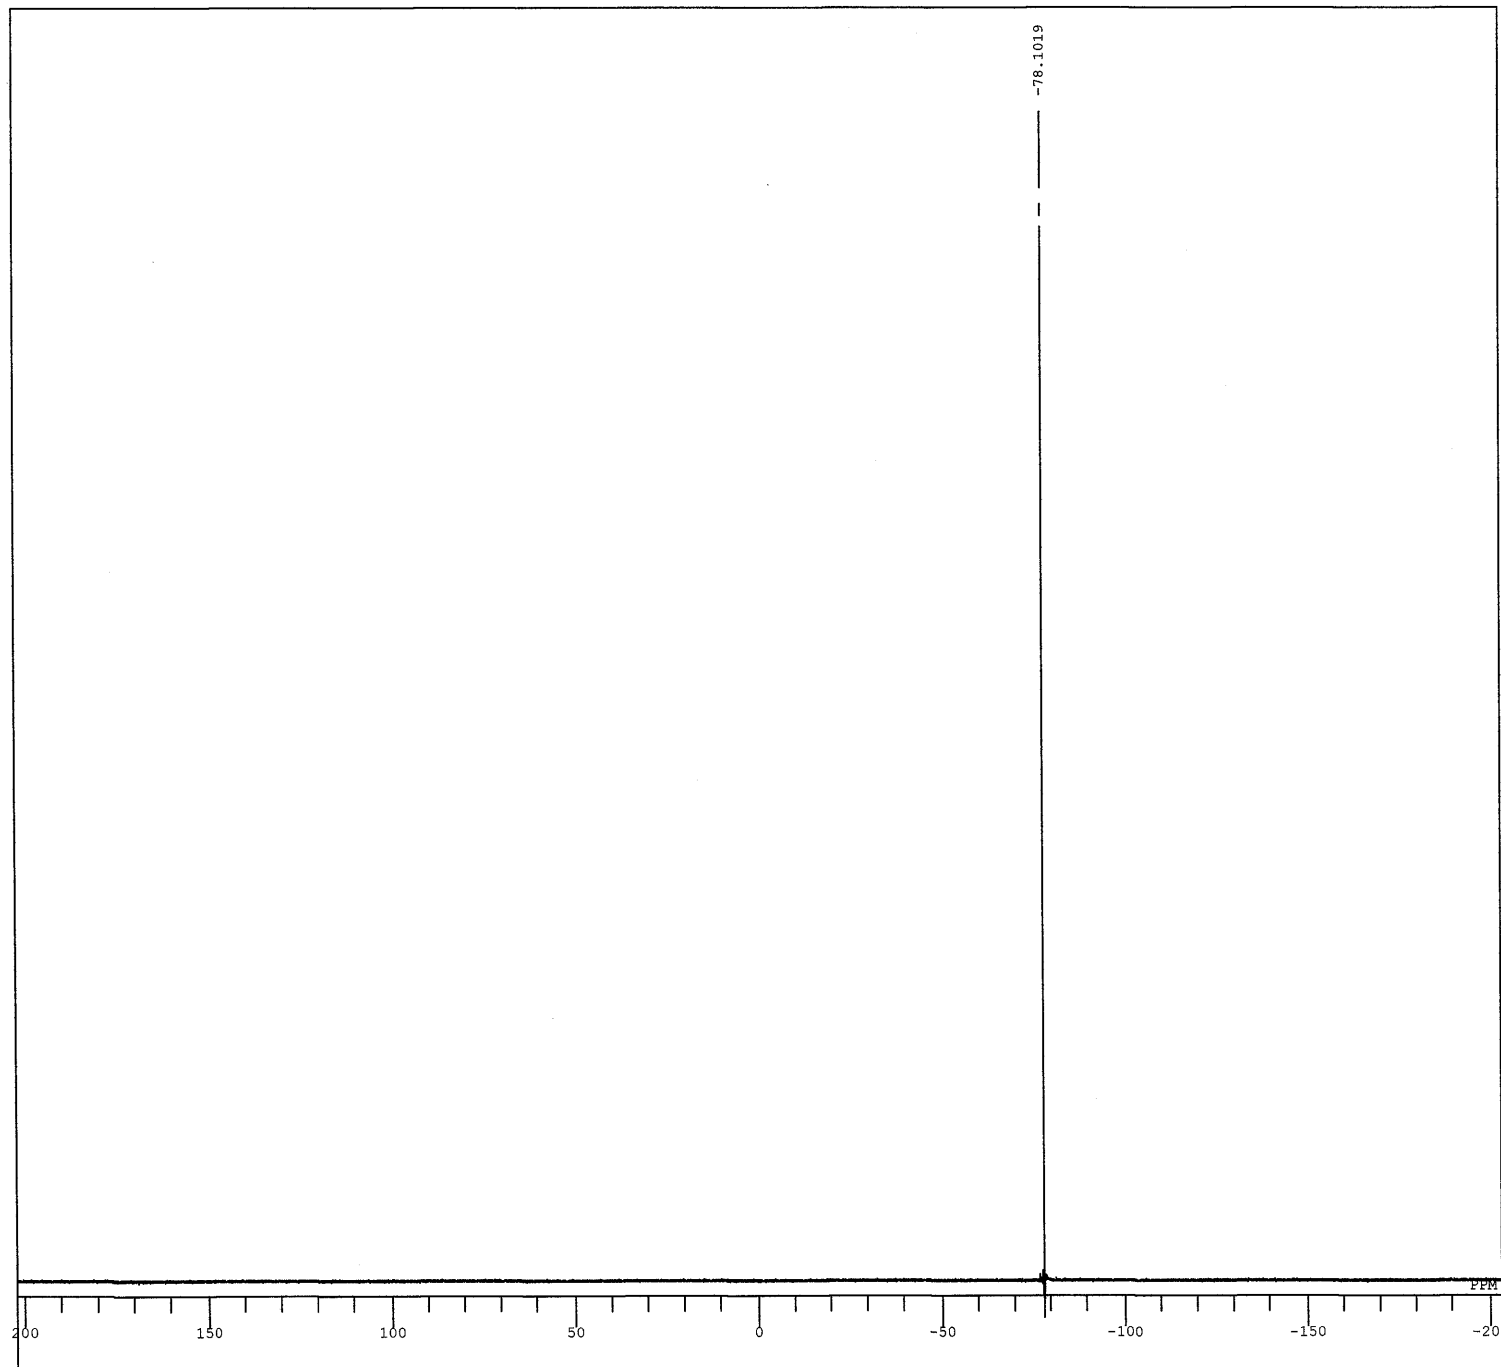

DFILE ozawa05-095\_1\_19F.jdf  
COMMT PhOAc, [0]  
DATIM 07-07-2014 18:30:14  
OBNUC 19F  
EXMOD proton.jxp  
OBFRQ 368.64 MHz  
OBSET 7.63 KHz  
OBFIN 2.85 Hz  
POINT 16384  
FREQU 186567.17 Hz  
SCANS 4  
ACQTM 0.0878 sec  
PD 5.0000 sec  
PW1 3.90 usec  
IRNUC 19F  
CTEMP 24.3 c  
SLVNT CDCL3  
EXREF -164.90 ppm  
BF 0.12 Hz  
RGAIN 50

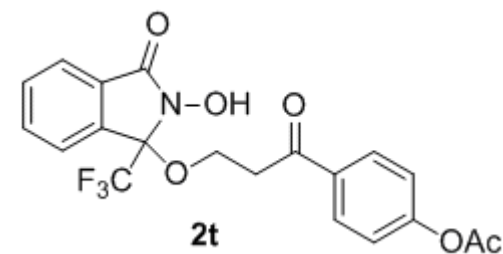

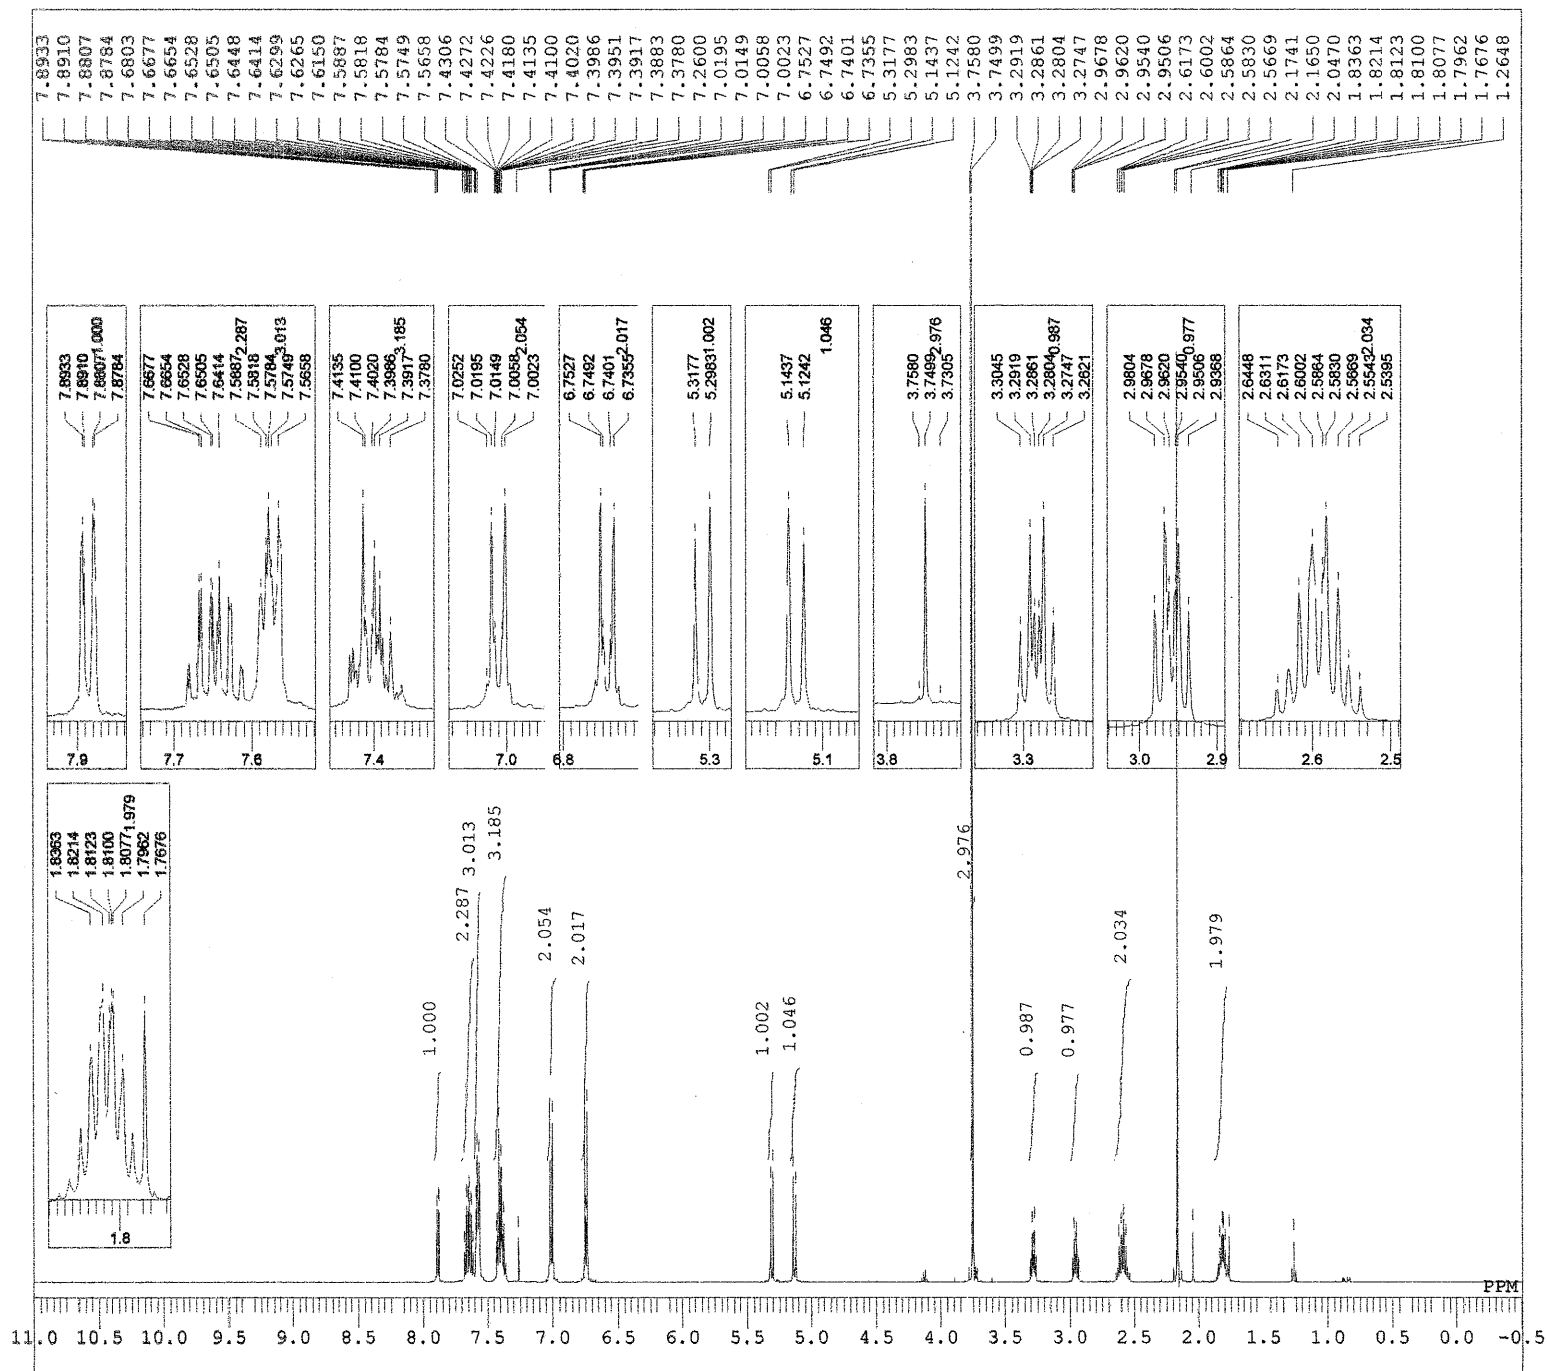

DFILE ozawa07-048\_1H.als  
 COMNT 4-Me-Ph, Bn  
 DATIM 2015-03-19 08:31:00  
 OBNUC 1H  
 EXMOD proton.jxp  
 OBFRQ 500.16 MHz  
 OBSET 2.41 KHz  
 OBFIN 6.01 Hz  
 POINT 13107  
 FREQU 7507.51 Hz  
 SCANS 4  
 ACQTM 1.7459 sec  
 PD 5.0000 sec  
 PW1 5.55 usec  
 IRNUC 1H  
 CTEMP 25.7 c  
 SLVNT CDCL3  
 EXREF 7.26 ppm  
 BF 0.12 Hz  
 RGAIN 26

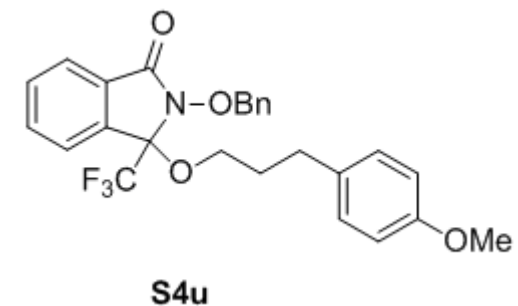

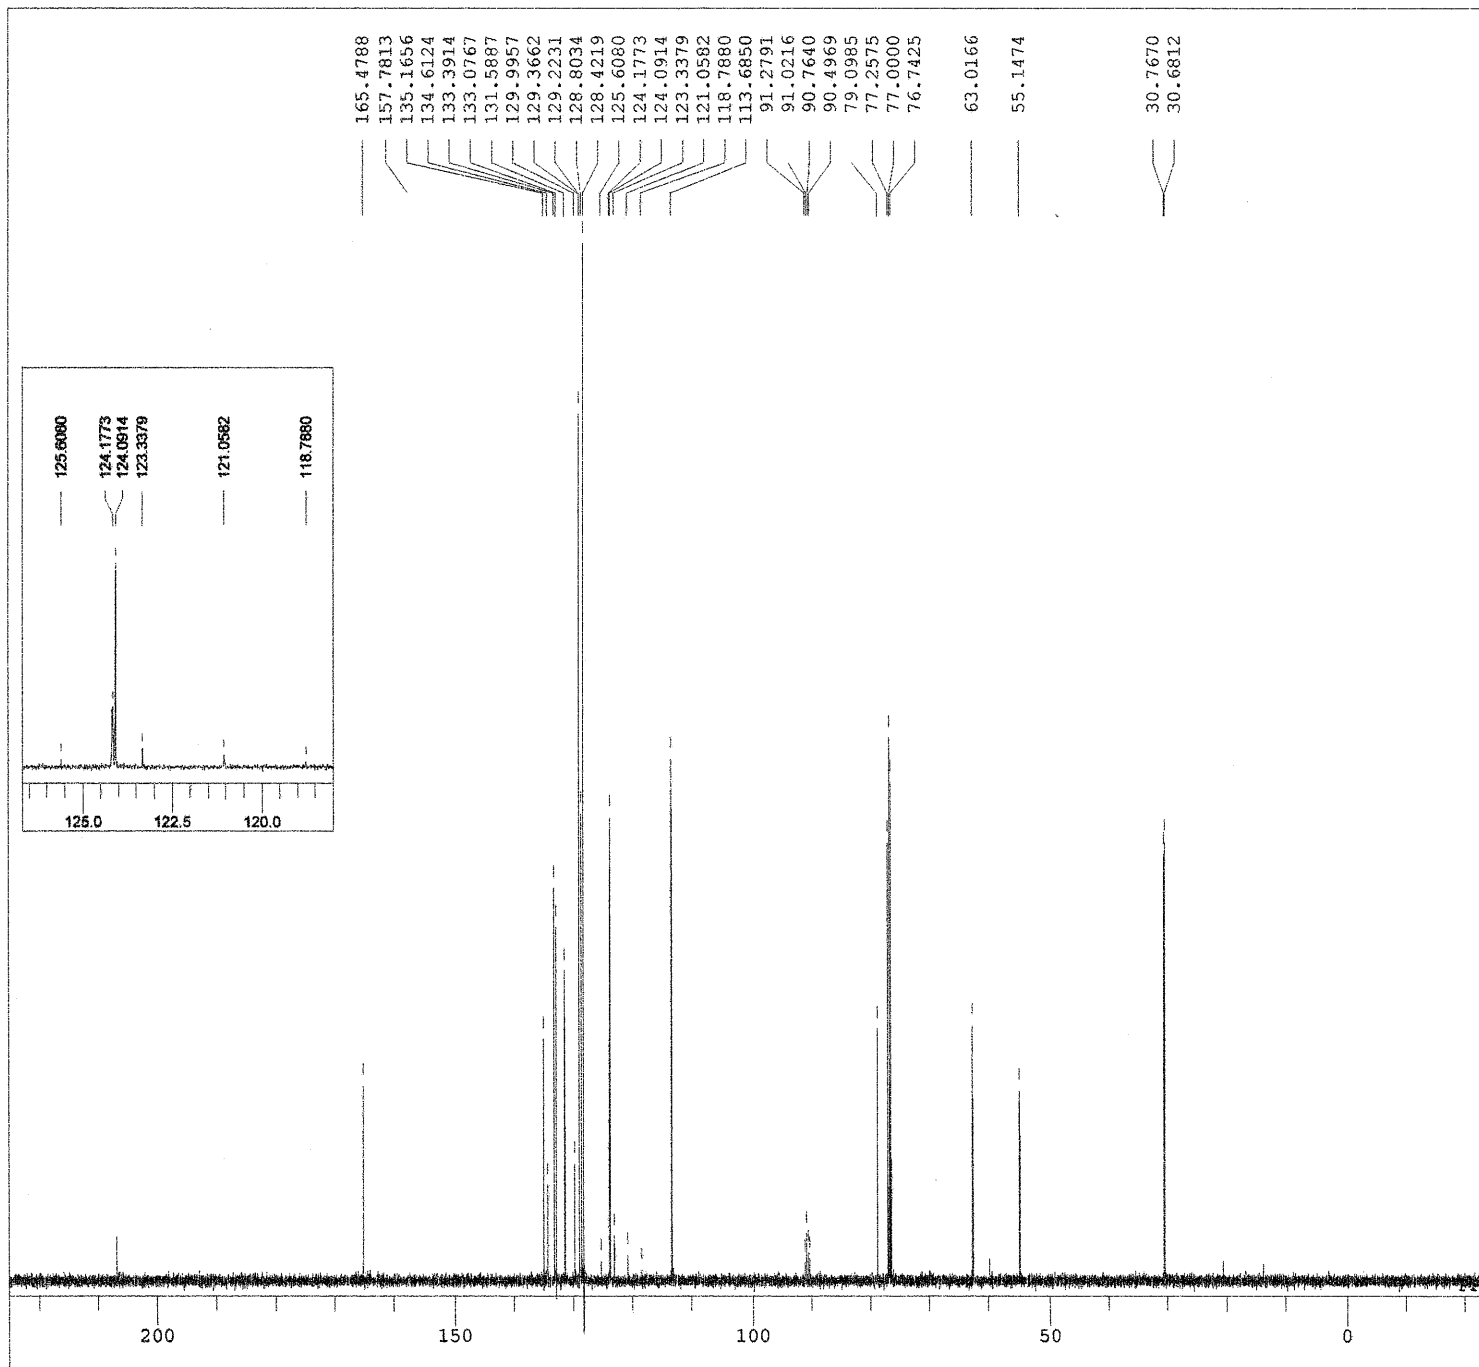

DFILE ozawa07-048\_13C.als  
 COMNT 4-OMe-Ph, Bn  
 DATIM 2015-03-19 08:32:02  
 OBNUC 13C  
 EXMOD carbon.jxp  
 OBFREQ 125.77 MHz  
 OBSSET 7.87 KHz  
 OBFIN 4.21 Hz  
 POINT 26214  
 FREQU 31446.54 Hz  
 SCANS 244  
 ACQTM 0.8336 sec  
 PD 2.0000 sec  
 PW1 3.40 usec  
 IRNUC 1H  
 CTEMP 26.3 c  
 SLVNT CDCL3  
 EXREF 77.00 ppm  
 BF 0.12 Hz  
 RGAIN 60

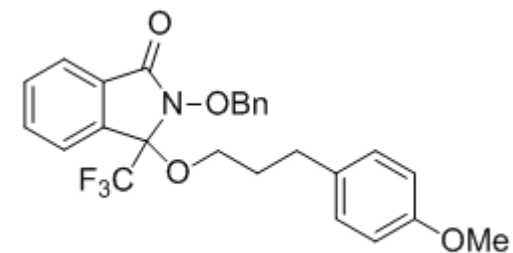

S4u

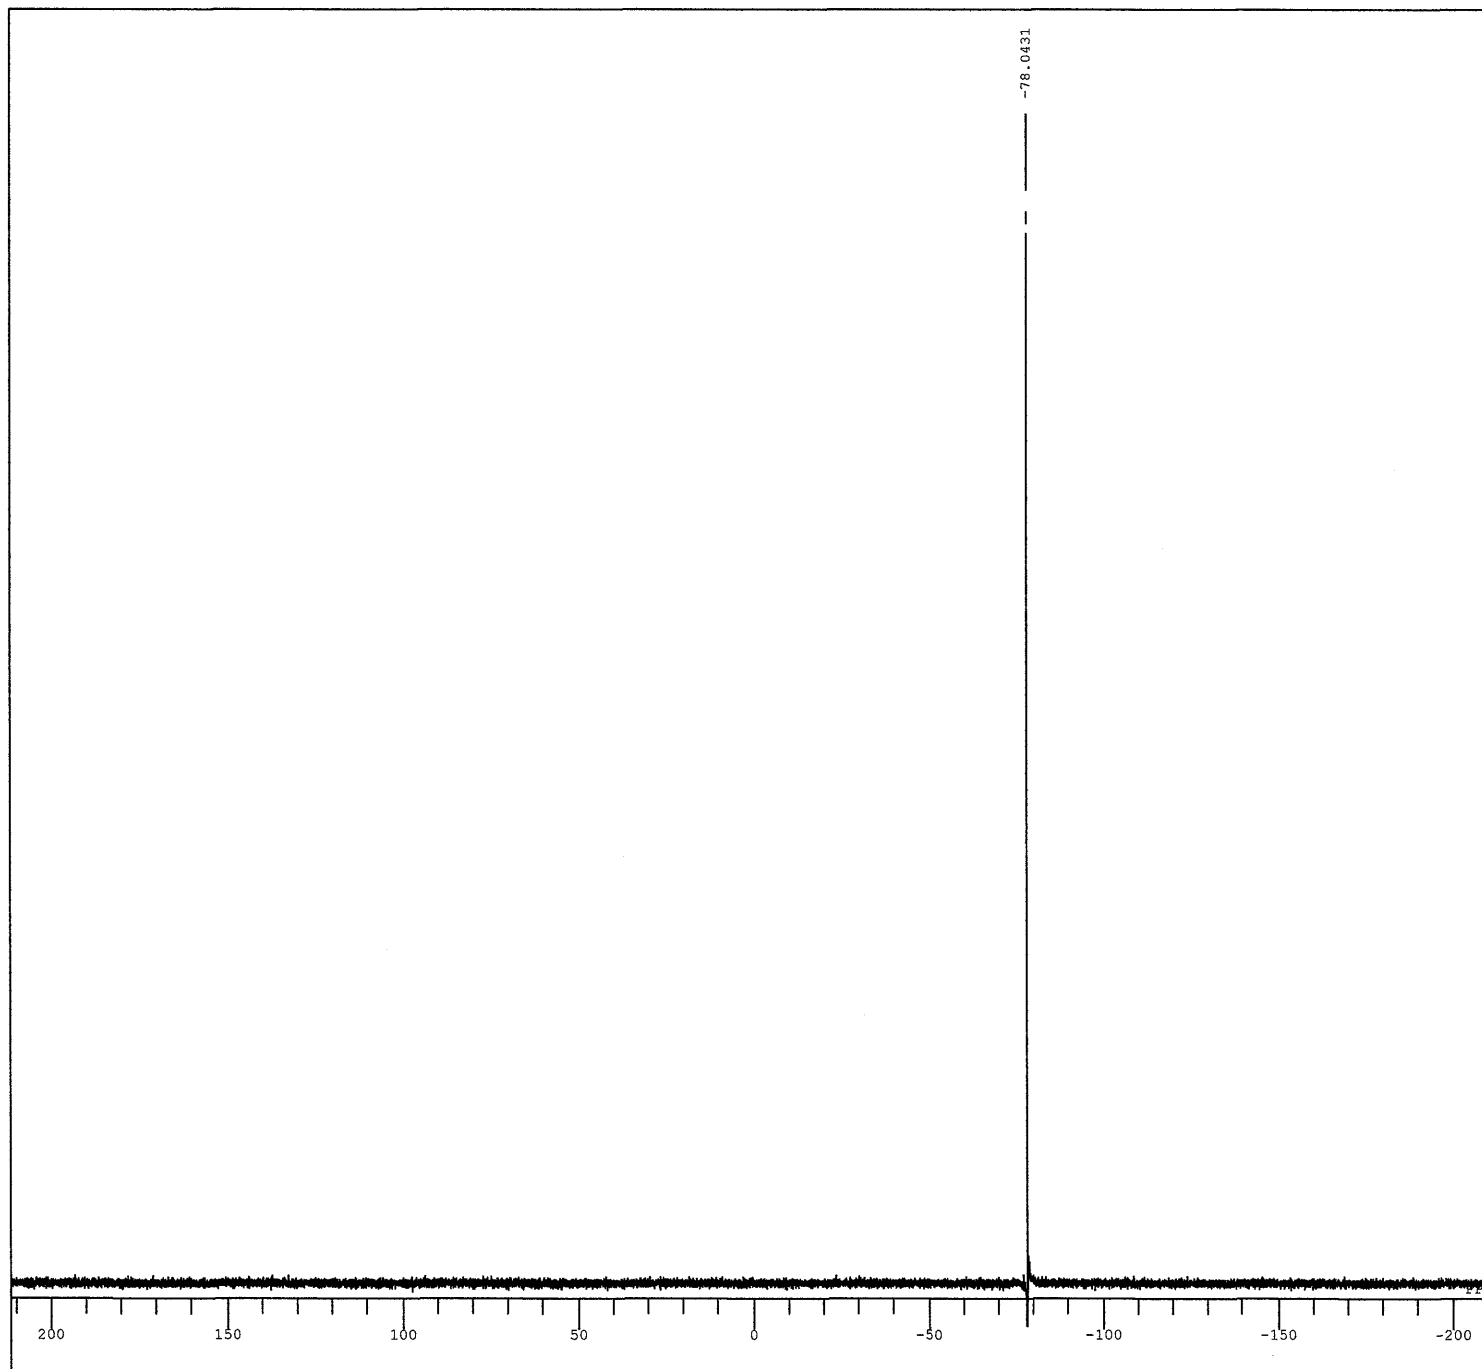

DFILE ozawa07-048\_19F.jdf  
COMNT 4-Me-Ph, Bn  
DATIM 21-03-2015 12:13:59  
OBNUC 19F  
EXMOD proton.jxp  
OBFREQ 368.64 MHz  
OBSEF 7.63 KHz  
OBFIN 2.85 Hz  
POINT 16384  
FREQU 195312.50 Hz  
SCANS 4  
ACQTM 0.0839 sec  
PD 5.0000 sec  
PWL 3.90 usec  
IRNUC 19F  
CTEMP 25.1 c  
SLVNT CDCL3  
EXREF -164.90 ppm  
BF 0.12 Hz  
RGAIN 50

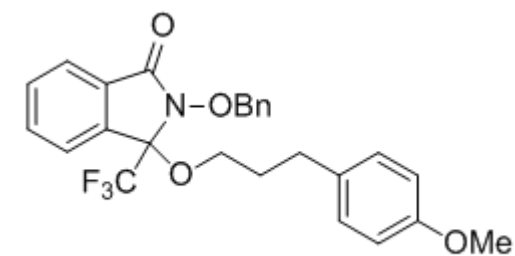

S4u

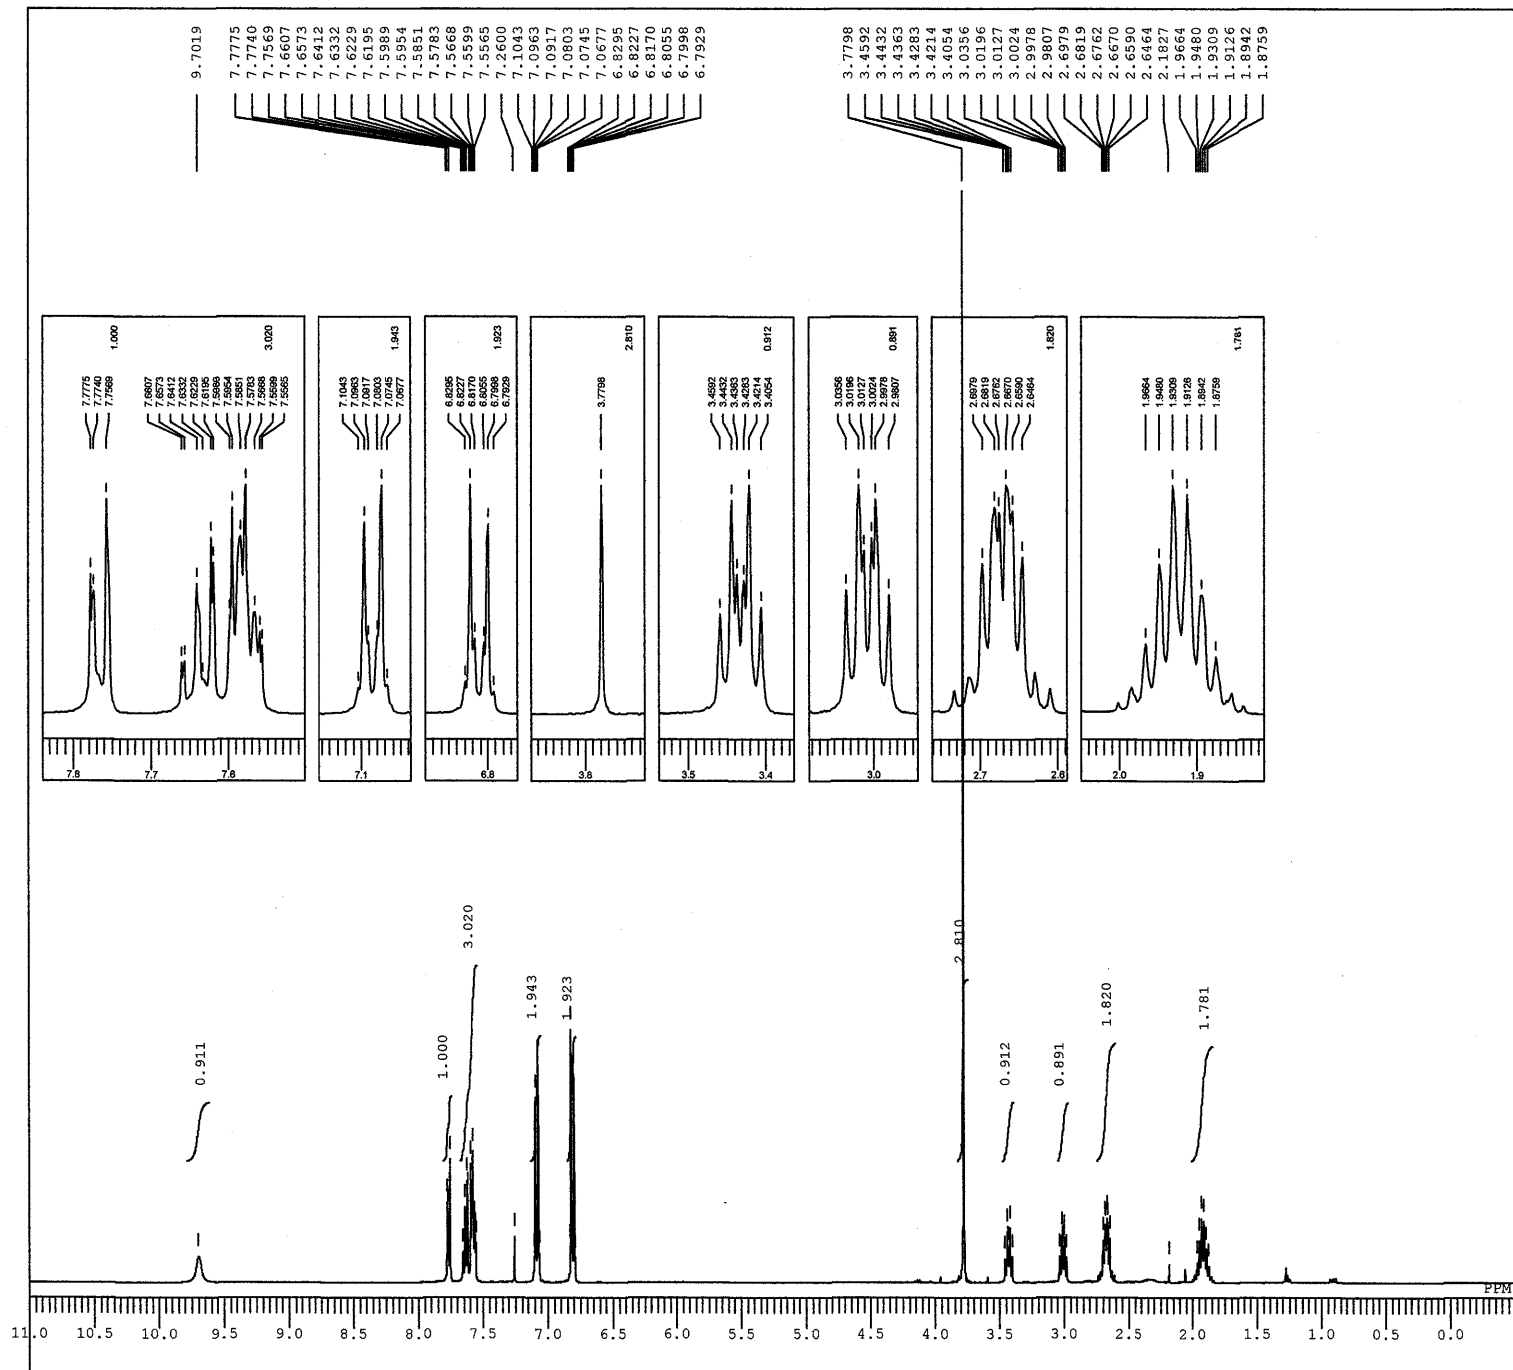

DFILE ozawa07-049 1H.jdf  
 COMNT 4-OMe-Ph, OH  
 DATIM 20-03-2015 17:32:44  
 OBNUC 1H  
 EXMOD proton.jxp  
 OBFREQ 391.78 MHz  
 OBSETE 8.51 KHz  
 OBFIN 3.34 Hz  
 POINT 16384  
 FREQU 7348.62 Hz  
 SCANS 4  
 ACQTM 2.2295 sec  
 PD 5.0000 sec  
 PW1 4.99 usec  
 IRNUC 1H  
 CTEMP 25.4 c  
 SLVNT CDCL3  
 EXREF 7.26 ppm  
 BF 0.12 Hz  
 RGAIN 30

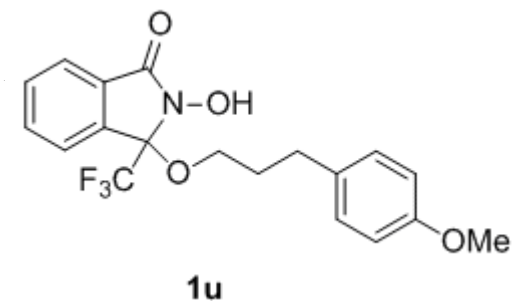

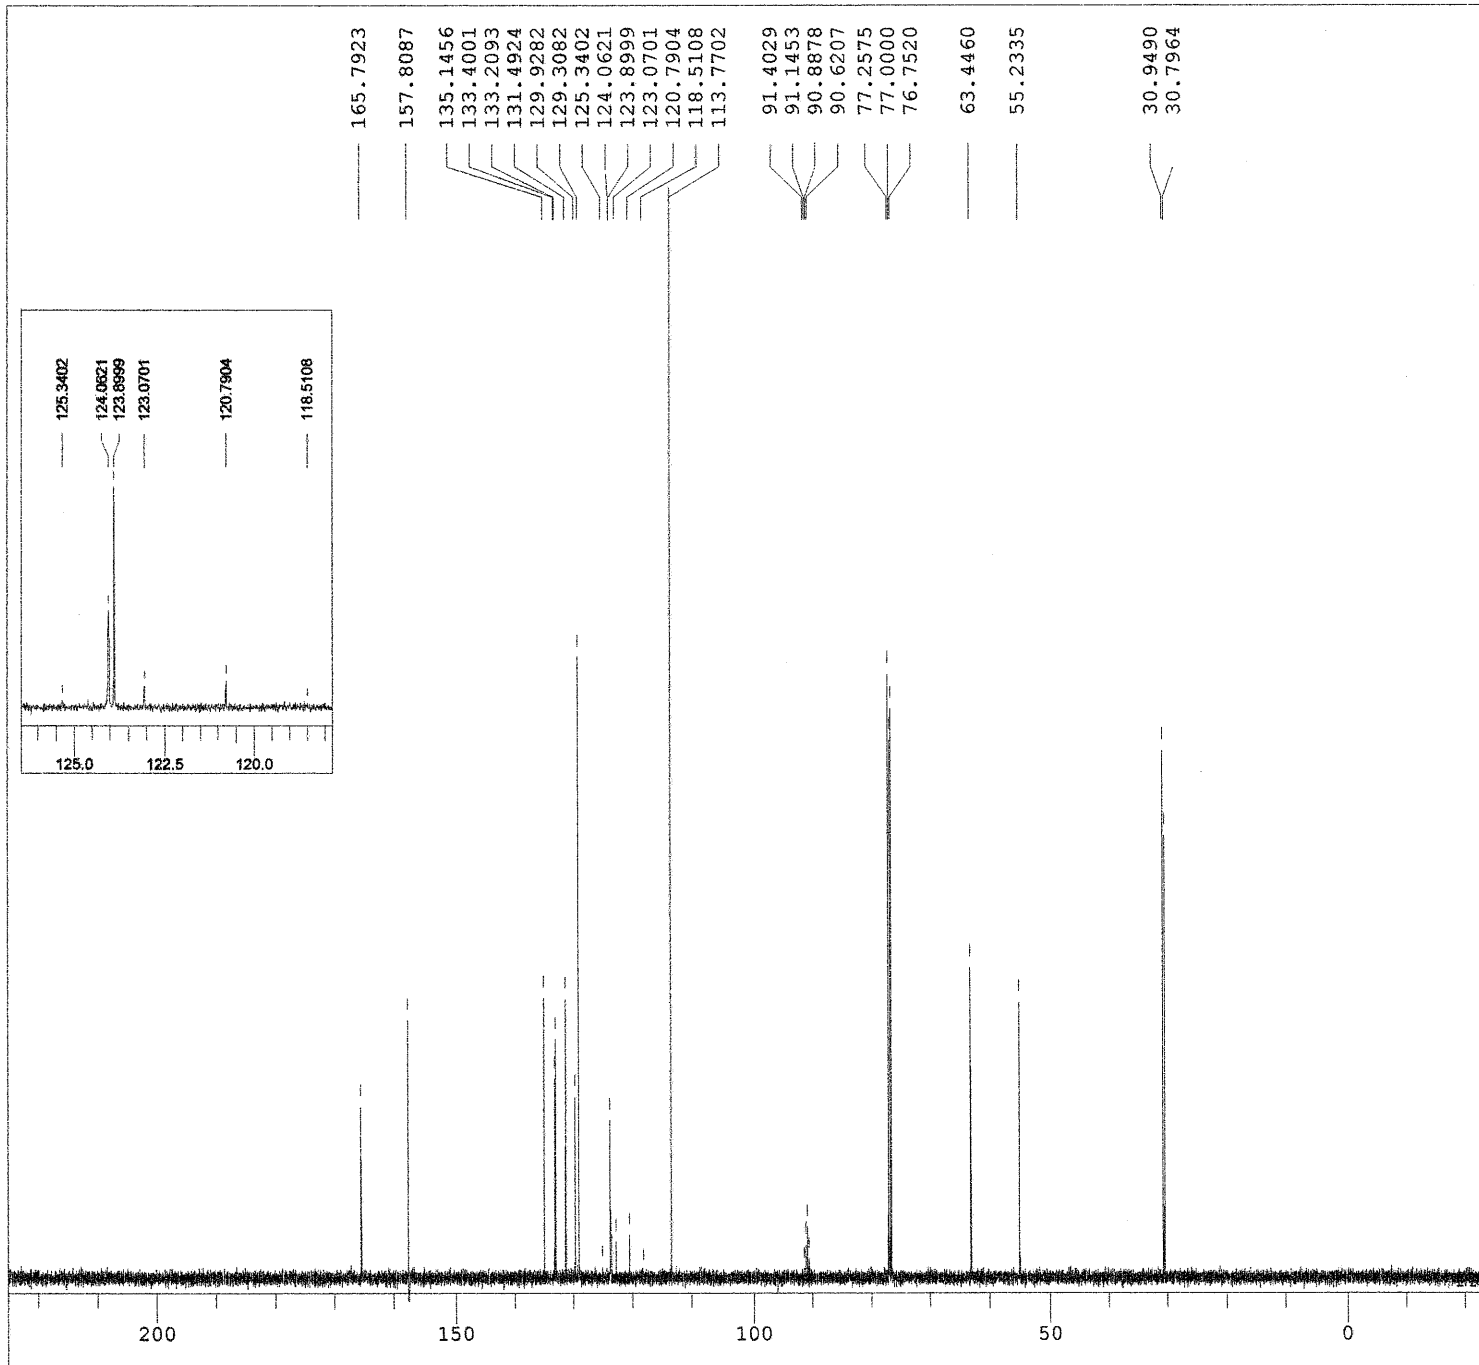

DFILE ozawa07-049\_C13.jdf  
 COMNT 4-OMe-Ph, OH  
 DATIM 2015-03-20 17:28:55  
 OBNUC 13C  
 EXMOD carbon.jxp  
 OBFRQ 125.77 MHz  
 OBSET 7.87 KHz  
 OBFIN 4.21 Hz  
 POINT 32767  
 FREQU 39308.18 Hz  
 SCANS 256  
 ACQTM 0.8336 sec  
 PD 2.0000 sec  
 PW1 3.40 usec  
 IRNUC 1H  
 CTEMP 26.7 c  
 SLVNT CDCL3  
 EXREF 77.00 ppm  
 BF 0.12 Hz  
 RGAIN 60

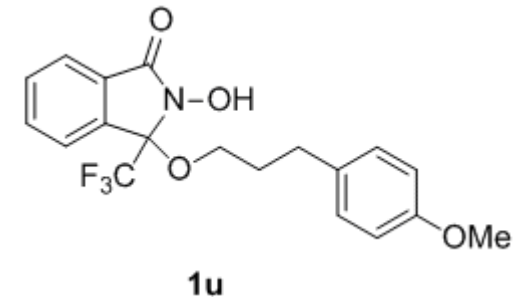



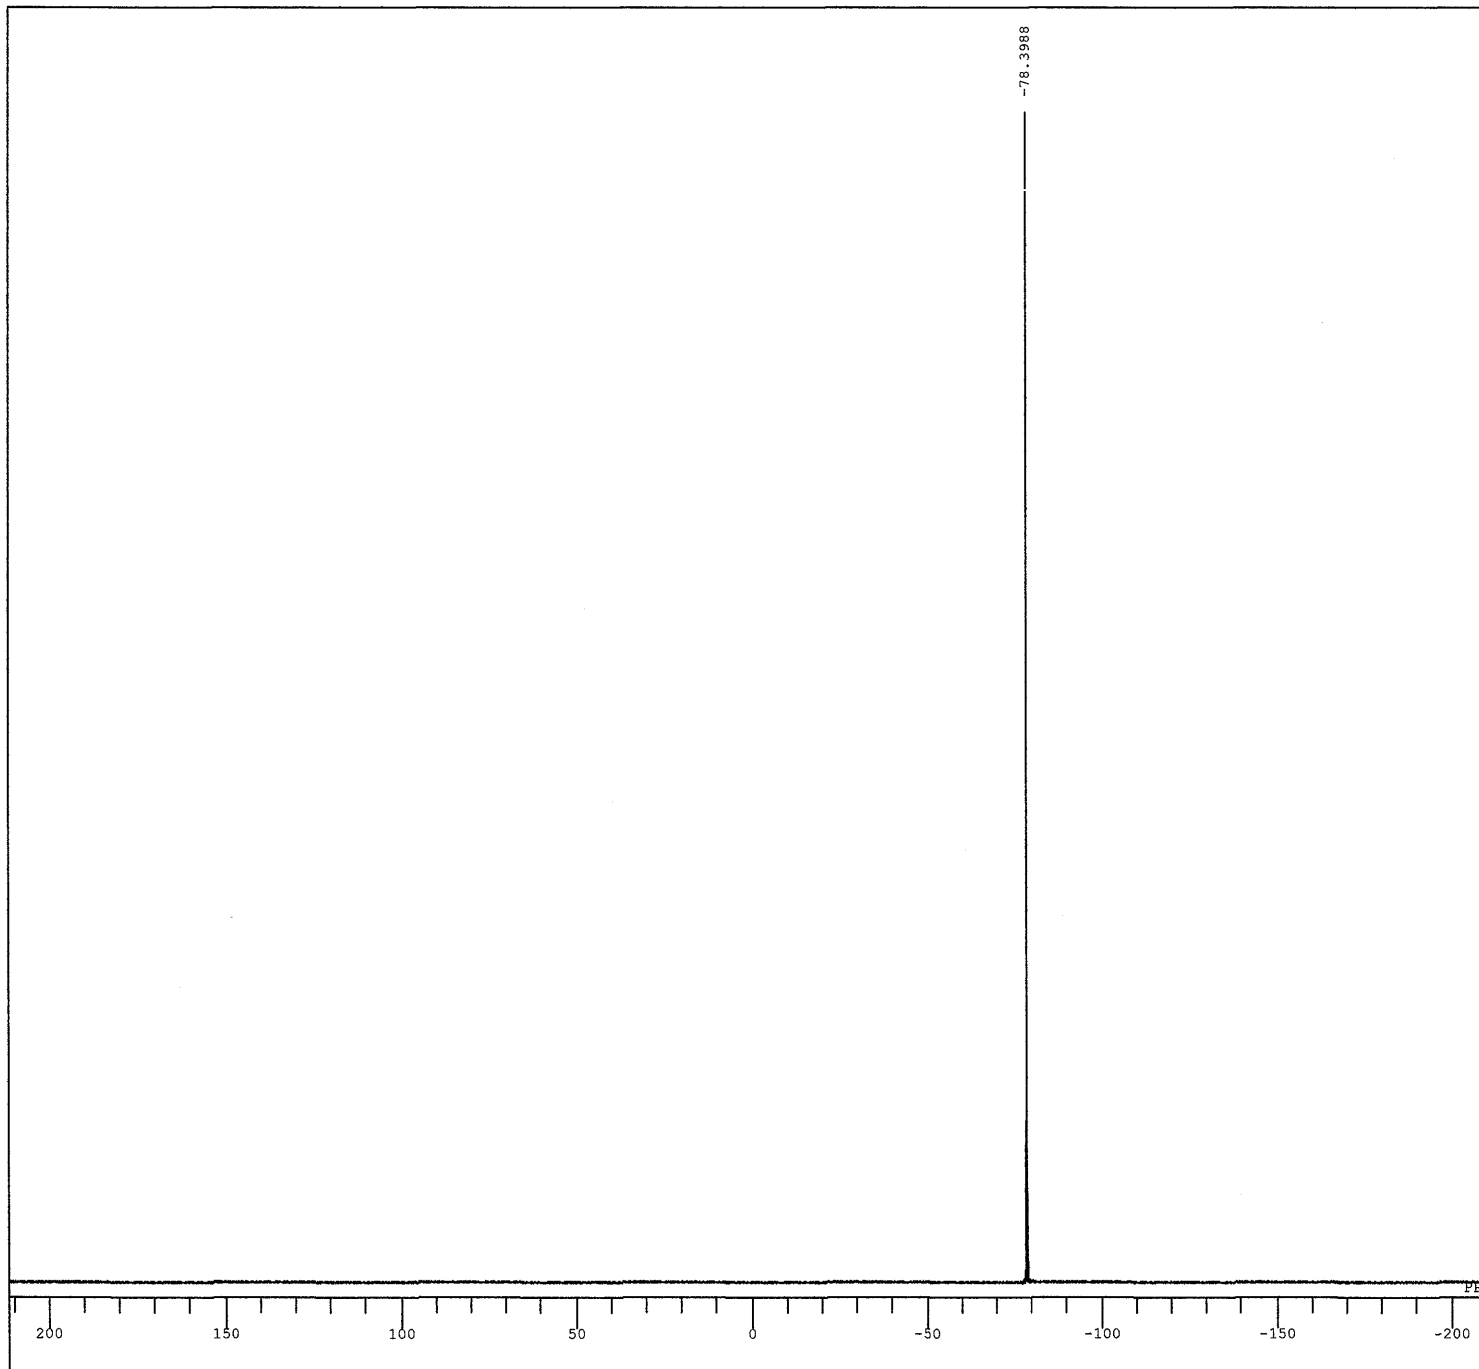

DFILE ozawa07-049\_19F.jdf  
COMNT 4-OMe-Ph, OH  
DATIM 20-03-2015 17:30:46  
19F  
EXMOD proton.jxp  
OBFREQ 368.64 MHz  
OBSETE 7.63 KHz  
OBFIN 2.85 Hz  
POINT 16384  
FREQU 195312.50 Hz  
SCANS 4  
ACQTM 0.0839 sec  
PD 5.0000 sec  
PWL 3.90 usec  
IRNUC 19F  
CTEMP 25.4 c  
SLVNT CDCL3  
EXREF -164.90 ppm  
BF 0.12 Hz  
RGAIN 50

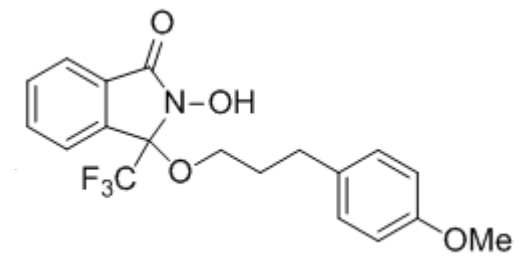**1u**

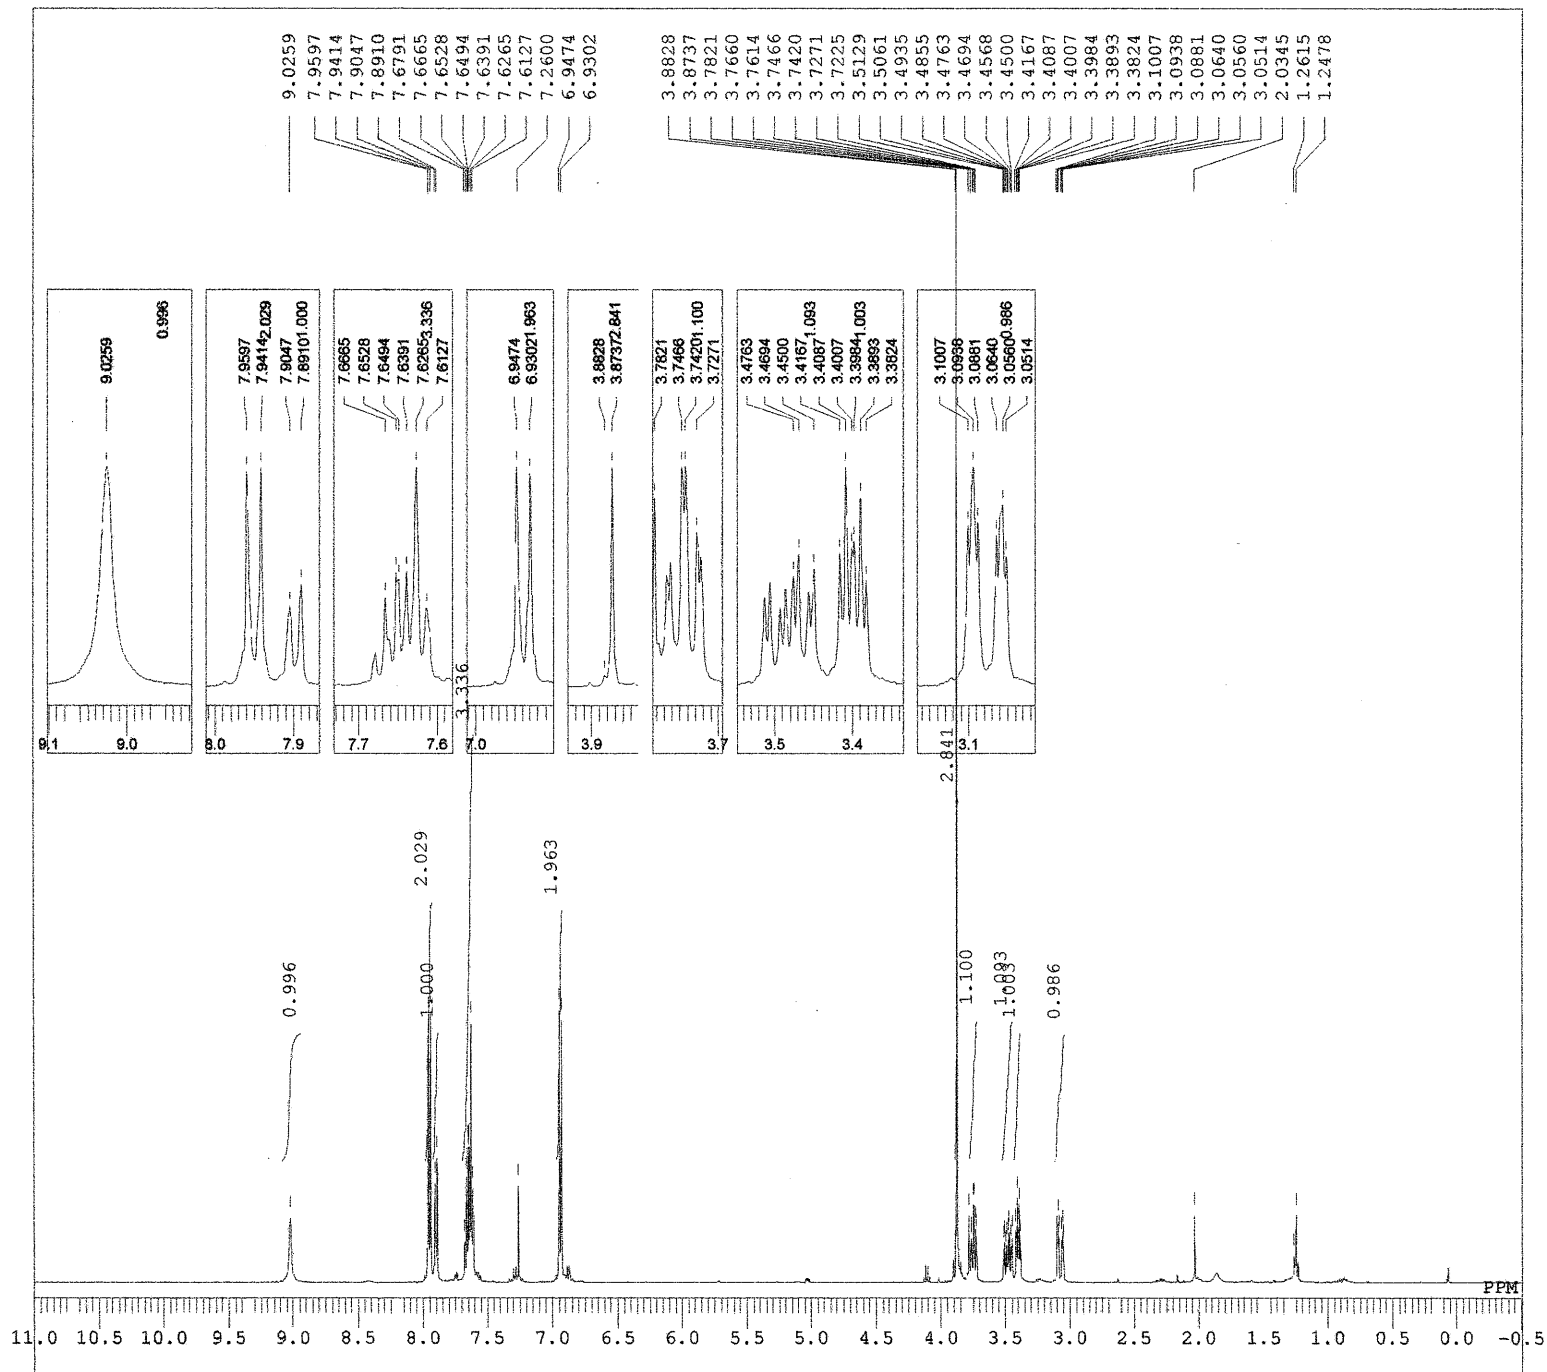

DFILE ozawa07-053 1H-1-1.jdf  
 COMNT 4-OMe-Ph, [O]  
 DATIM 2015-03-23 16:44:10  
 OBNUC 1H  
 EXMOD proton.jxp  
 OBFRQ 500.16 MHz  
 OBSET 2.41 KHz  
 OBFIN 6.01 Hz  
 POINT 16384  
 FREQU 9384.38 Hz  
 SCANS 4  
 ACQTM 1.7459 sec  
 PD 5.0000 sec  
 PW1 5.55 usec  
 IRNUC 1H  
 CTEMP 26.2 c  
 SLVNT CDCl3  
 EXREF 7.26 ppm  
 BF 0.12 Hz  
 RGAIN 30

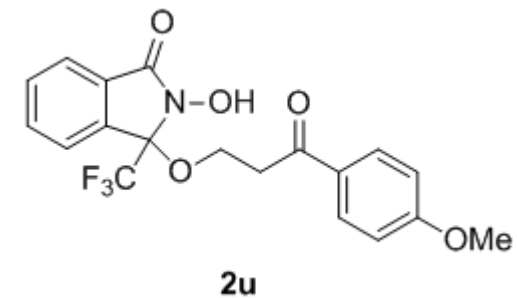

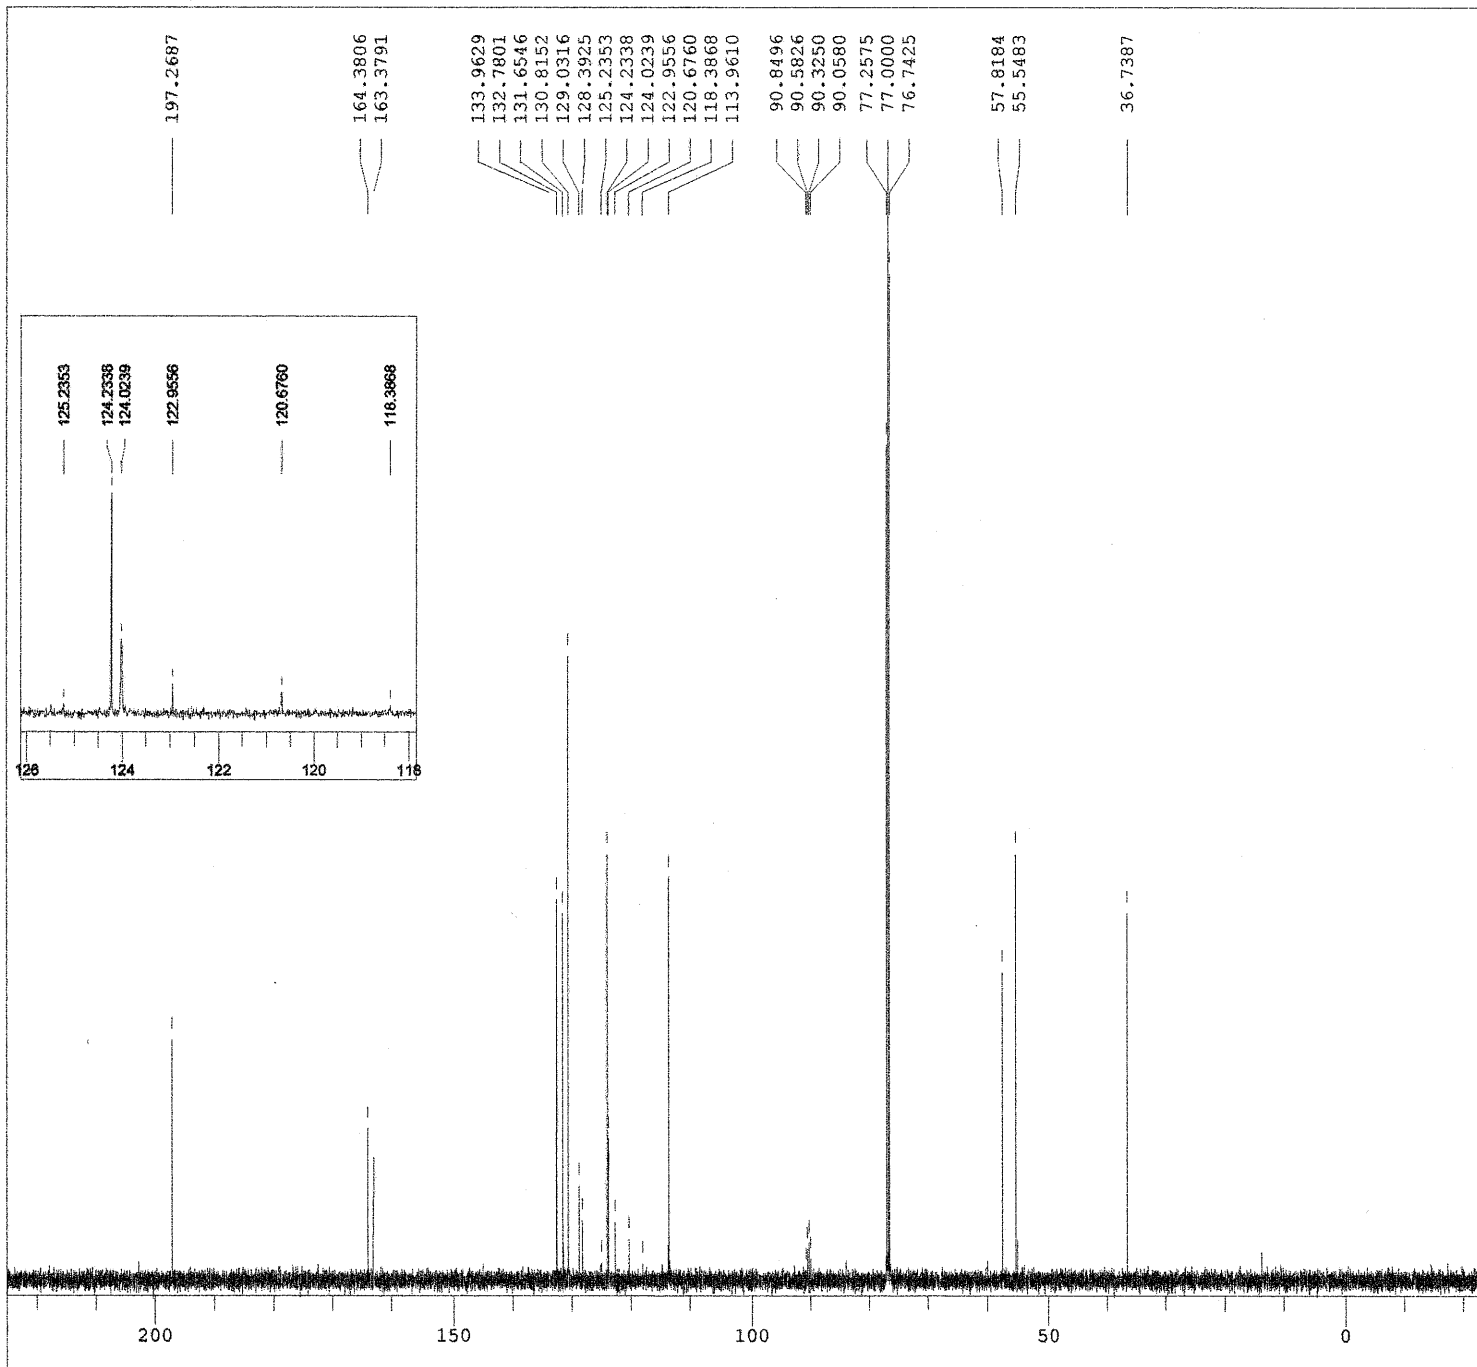

DFILE ozawa07-053\_13C.jdf  
 COMNT 4-OMe-Ph, [O]  
 DATIM 2015-03-23 16:45:12  
 OBNUC 13C  
 EXMOD carbon.jxp  
 OBFRQ 125.77 MHz  
 OBSSET 7.87 KHz  
 OBFIN 4.21 Hz  
 POINT 32767  
 FREQU 39308.18 Hz  
 SCANS 500  
 ACQTM 0.8336 sec  
 PD 2.0000 sec  
 PW1 3.40 usec  
 IRNUC 1H  
 CTEMP 26.8 c  
 SLVNT CDCL3  
 EXREF 77.00 ppm  
 BF 0.12 Hz  
 RGAIN 60

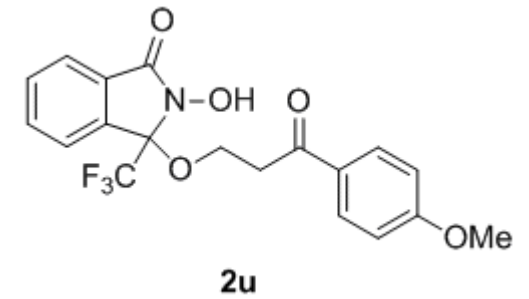

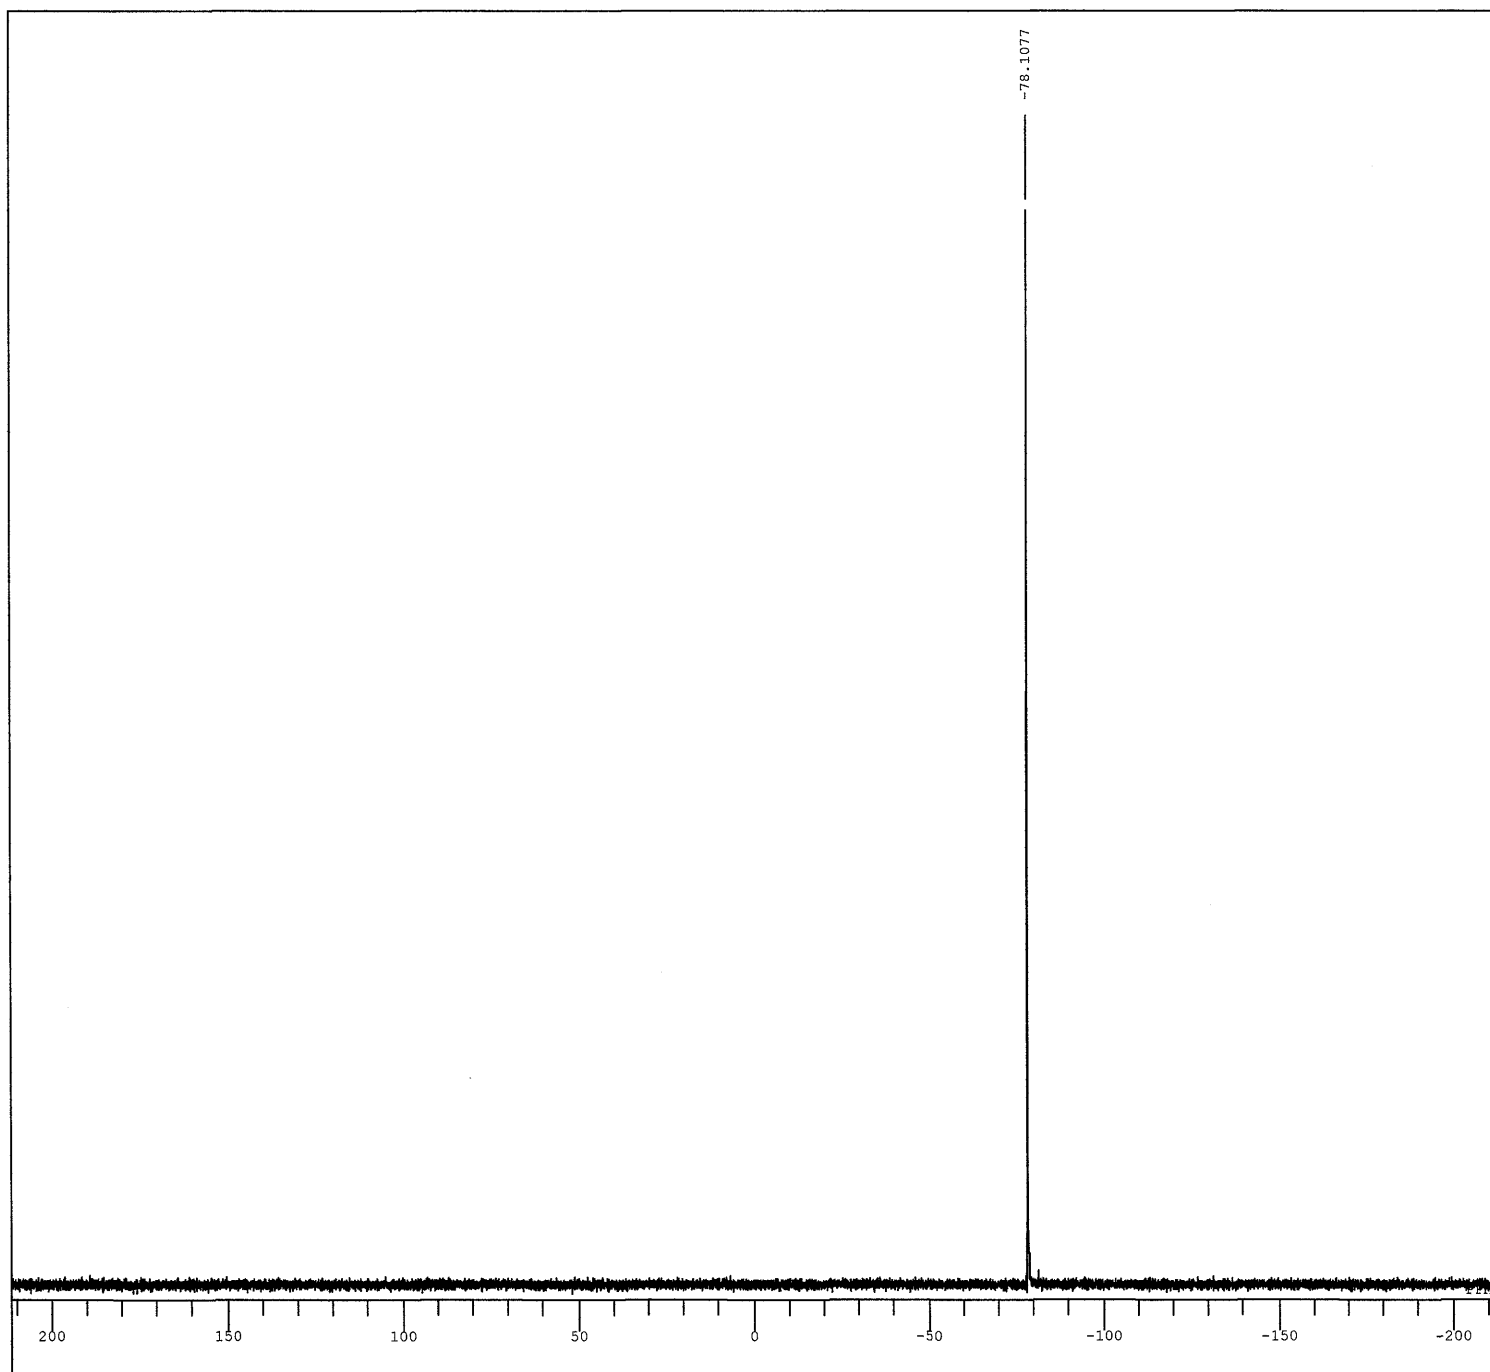

DFILE ozawa07-050\_19F.jdf  
COMNT 4-OMe-Ph, [O]  
DATIM 20-03-2015 17:27:38  
OBNUC 19F  
EXMOD proton.jxp  
OBFREQ 368.64 MHz  
OBSET 7.63 KHz  
OBFIN 2.85 Hz  
POINT 16384  
FREQU 195312.50 Hz  
SCANS 4  
ACQTM 0.0839 sec  
PD 5.0000 sec  
PW1 3.90 usec  
IRNUC 19F  
CTEMP 25.4 c  
SLVNT CDCL3  
EXREF -164.90 ppm  
BF 0.12 Hz  
RGAIN 50

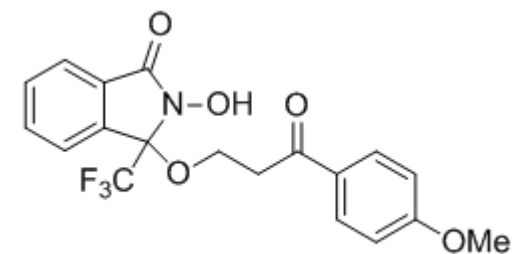

2u

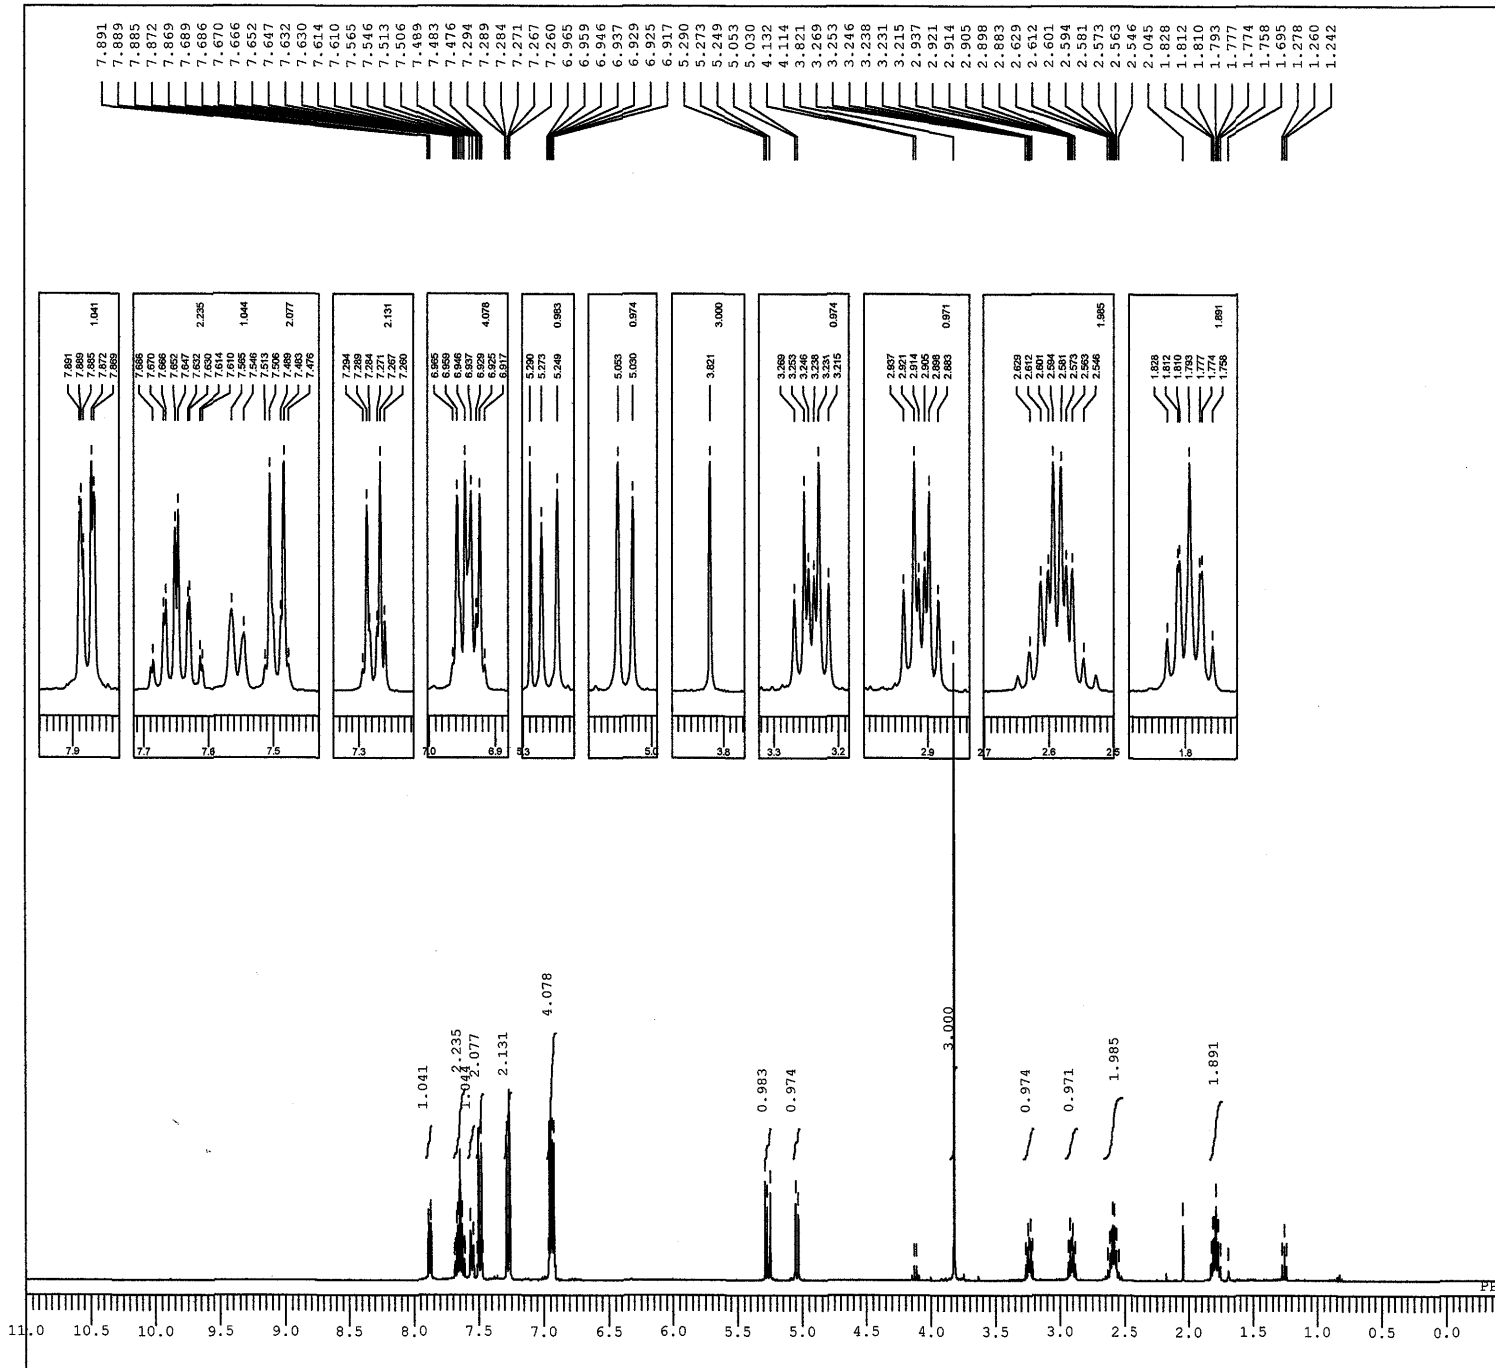

DFILE ozawa06-116 1H.jdf  
 COMNT 4-BrPh-PrOH, PMB  
 DATIM 24-12-2014 13:35:46  
 OBNUC 1H  
 EXMOD proton.jxp  
 OBFRO 391.78 MHz  
 OBSET 8.51 KHz  
 OBFIN 3.34 Hz  
 POINT 16384  
 FREQU 7349.62 Hz  
 SCANS 8  
 ACQTM 2.2295 sec  
 PD 5.0000 sec  
 PW1 5.07 usec  
 IRNUC 1H  
 CTEMP 22.2 c  
 SLVNT CDCL3  
 EXREF 7.26 ppm  
 BF 0.12 Hz  
 RGAIN 30

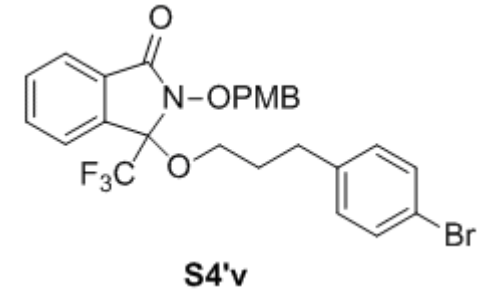

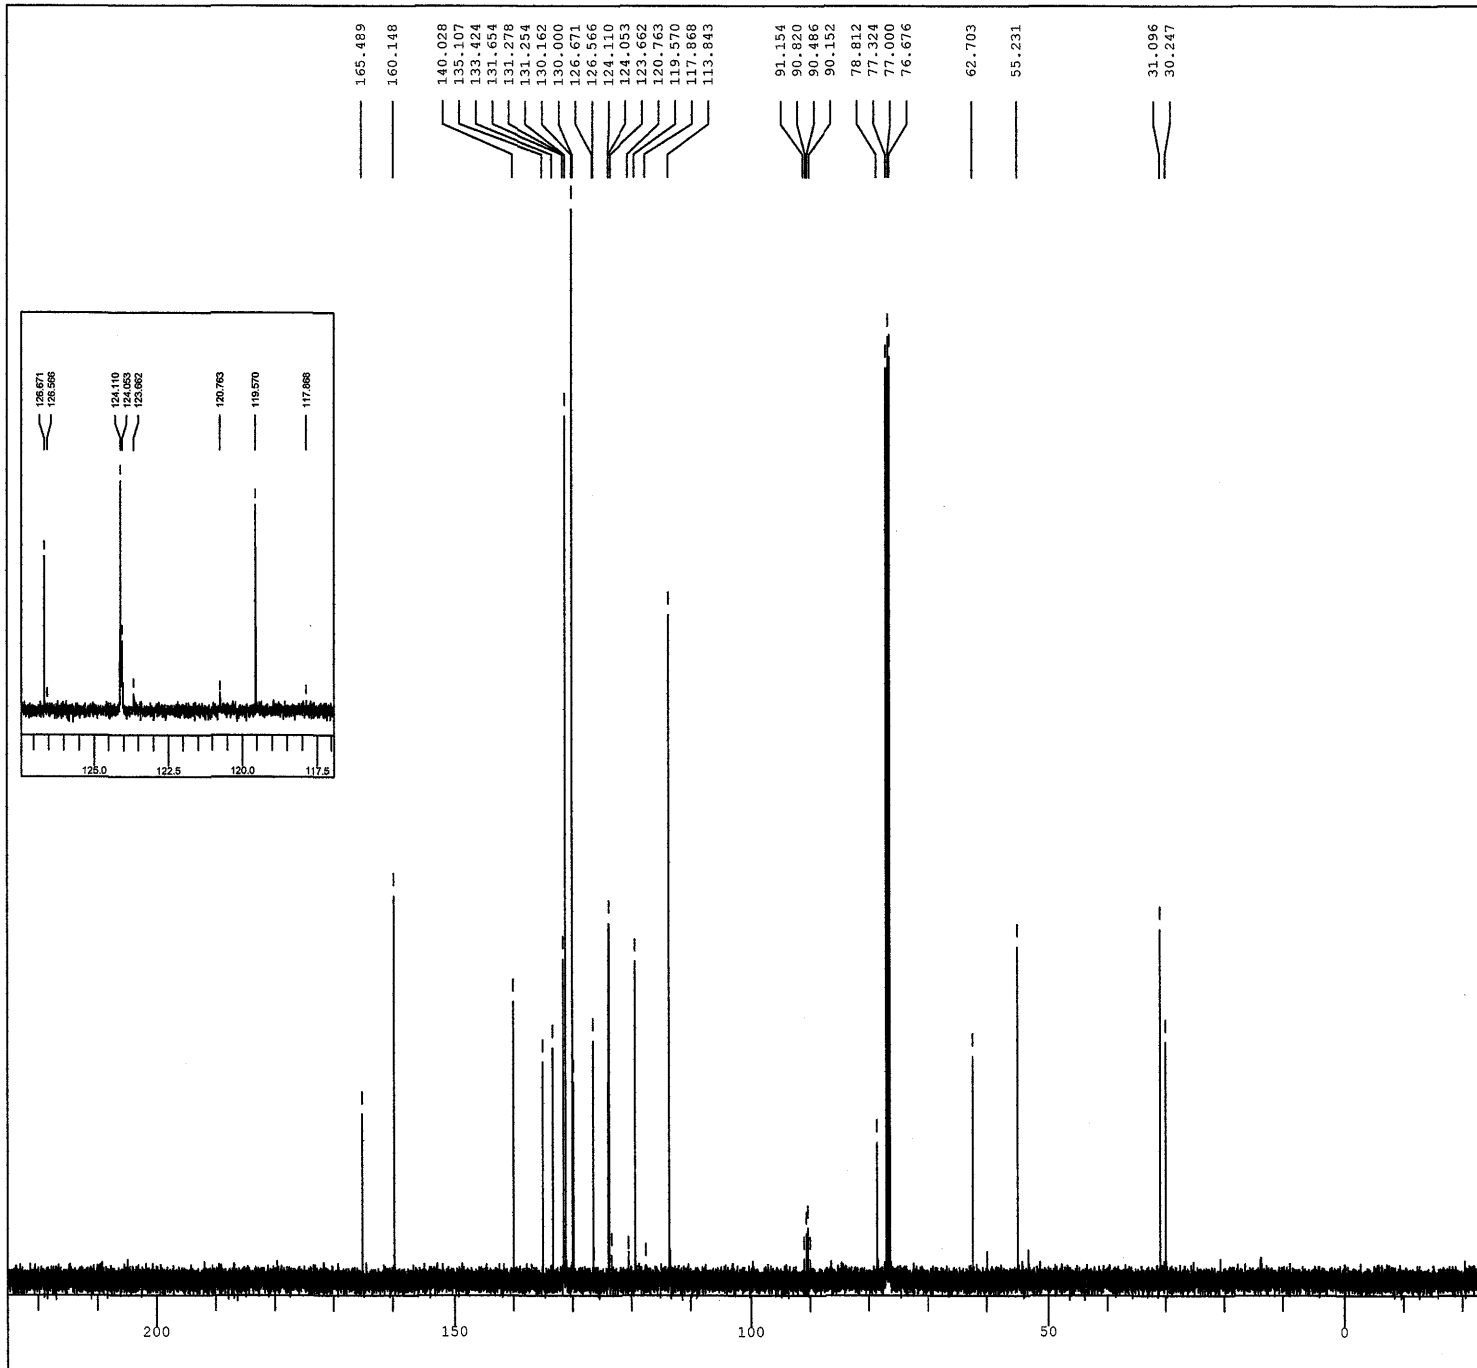

DFILE ozawa06-116 13C.jdf  
 COMNT 4-BrPh-PrOH, PMB  
 DATIM 24-12-2014 13:37:22  
 OBNUC 13C  
 EXMOD carbon.jxp  
 OBFRO 98.52 MHz  
 OBSET 4.64 KHz  
 OBFIN 8.74 Hz  
 POINT 65535  
 FREQU 30788.18 Hz  
 SCANS 340  
 ACQTM 2.1286 sec  
 PD 2.0000 sec  
 PW1 3.07 usec  
 IRNUC 1H  
 CTEMP 22.3 c  
 SLVNT CDCL3  
 EXREF 77.00 ppm  
 BF 0.12 Hz  
 RGAIN 60

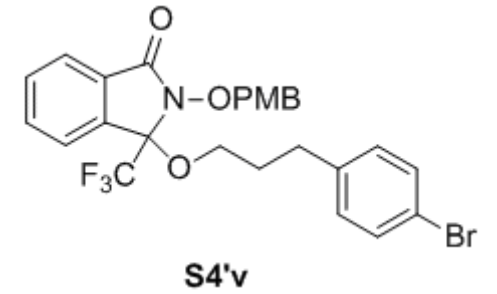

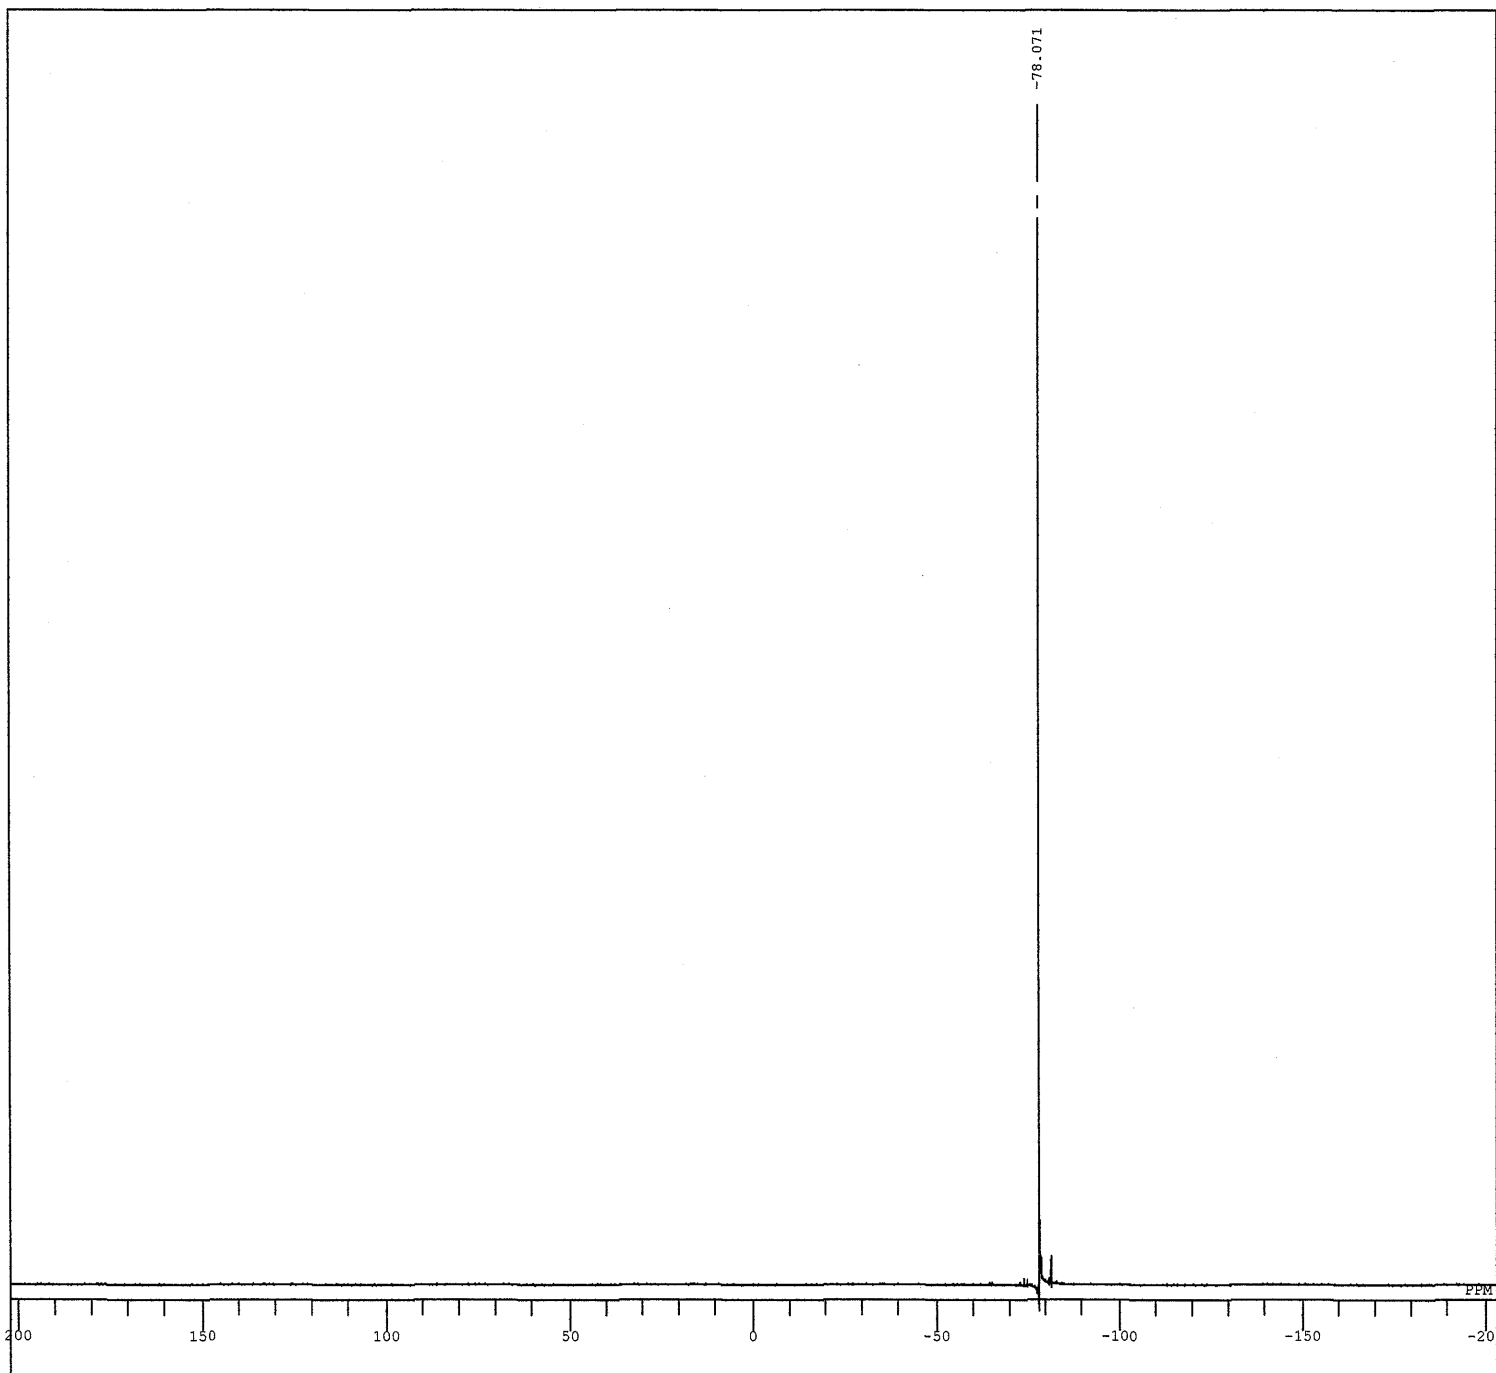

DFILE ozawa06-116\_19F.jdf  
COMNT 4-BrPh-PrOH, PMB  
DATIM 24-12-2014 13:33:22  
OBNUC 19F  
EXMOD proton.jxp  
OBFRO 368.64 MHz  
OBSET 7.63 KHz  
OBFIN 2.85 Hz  
POINT 16384  
FREQU 186567.17 Hz  
SCANS 8  
ACQTM 0.0878 sec  
PD 5.0000 sec  
PWL 3.90 usec  
IRNUC 19F  
CTEMP 22.2 c  
SLVNT CDCL3  
EXREF -164.90 ppm  
BF 0.12 Hz  
RGAIN 48

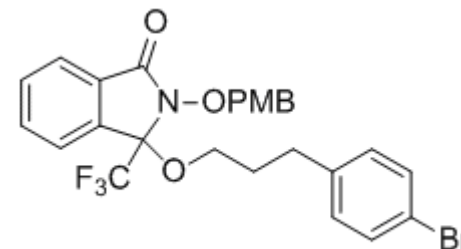

S4'v

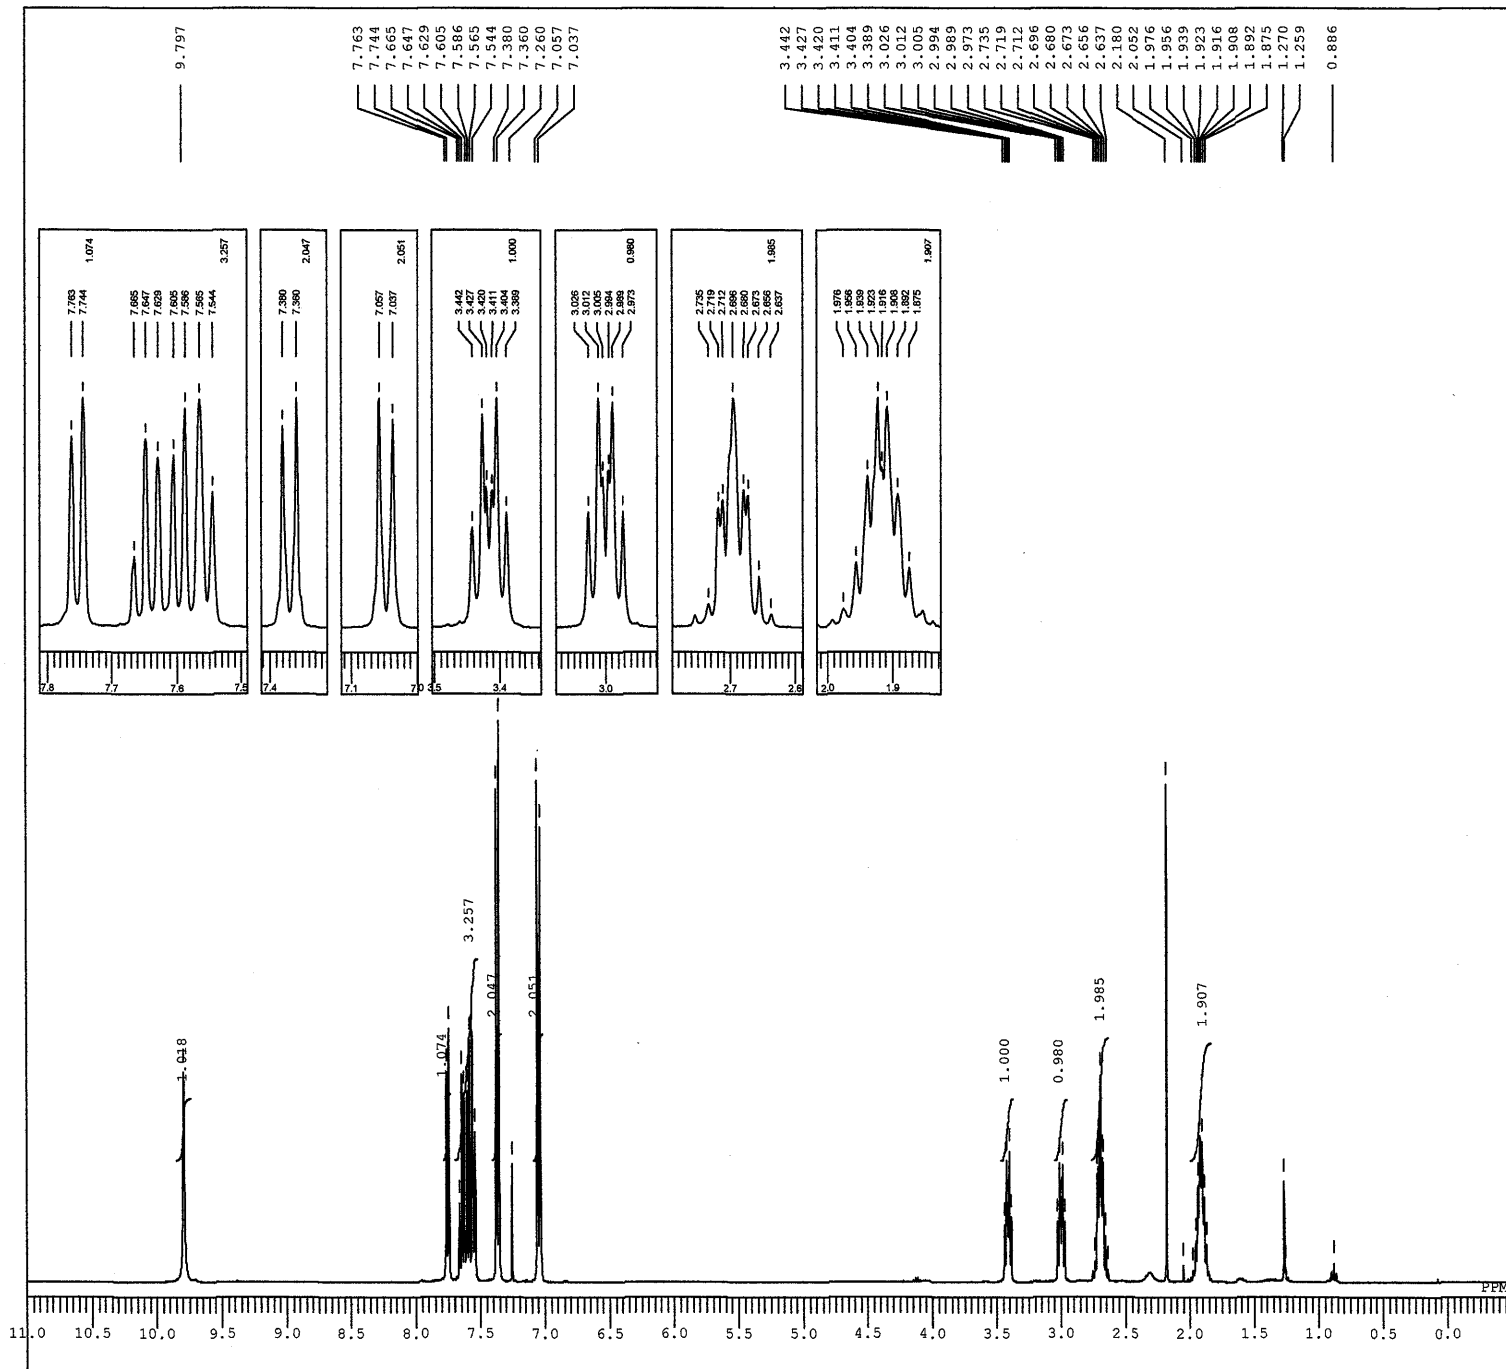

DFILE ozawa06-117 1H.jdf  
 COMNT 4-Br-Ph, OH  
 DATIM 30-12-2014 10:15:11  
 OBNUC 1H  
 EXMOD proton.jxp  
 OBFRO 391.78 MHz  
 OBSFT 8.51 KHz  
 OBFIN 3.34 Hz  
 POINT 16384  
 FREQU 7348.62 Hz  
 SCANS 8  
 ACQTM 2.2295 sec  
 PD 5.0000 sec  
 PW1 5.07 usec  
 IRNUC 1H  
 CTEMP 21.5 c  
 SLVNT CDCL3  
 EXREF 7.26 ppm  
 BF 0.12 Hz  
 RGAIN 32

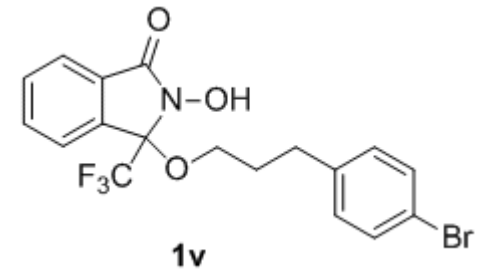



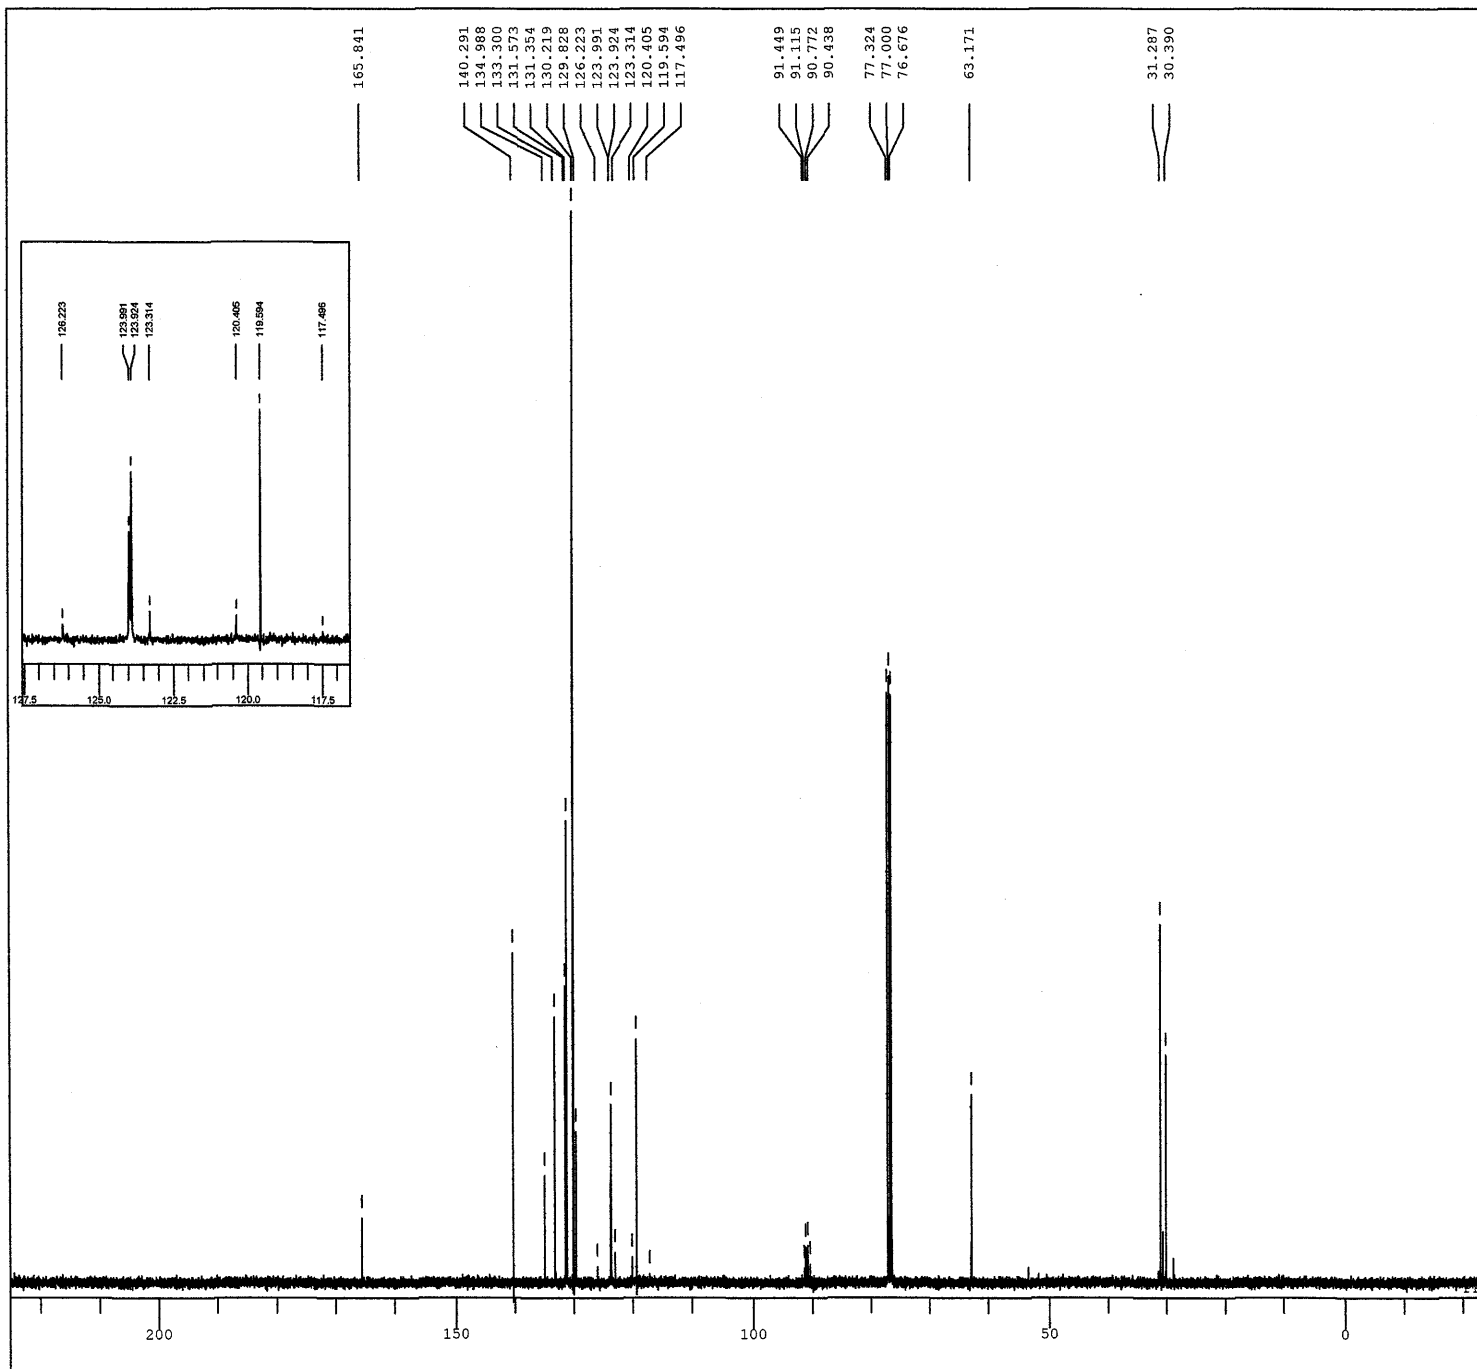

DFILE ozawa06-117\_13C.jdf  
 COMNT 4-Br-Ph, OH  
 DATIM 30-12-2014 10:18:35  
 OBNUC 13C  
 EXMOD carbon.jxp  
 OBFRO 98.52 MHz  
 OBSFT 4.64 KHz  
 OBFIN 8.74 Hz  
 POINT 32767  
 FREQU 30788.18 Hz  
 SCANS 460  
 ACQTM 1.0643 sec  
 PD 3.0000 sec  
 PW1 3.07 usec  
 IRNUC 1H  
 CTEMP 21.9 c  
 SLVNT CDCL3  
 EXREF 77.00 ppm  
 BF 0.12 Hz  
 RGAIN 60

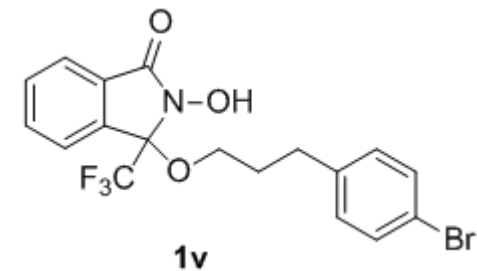

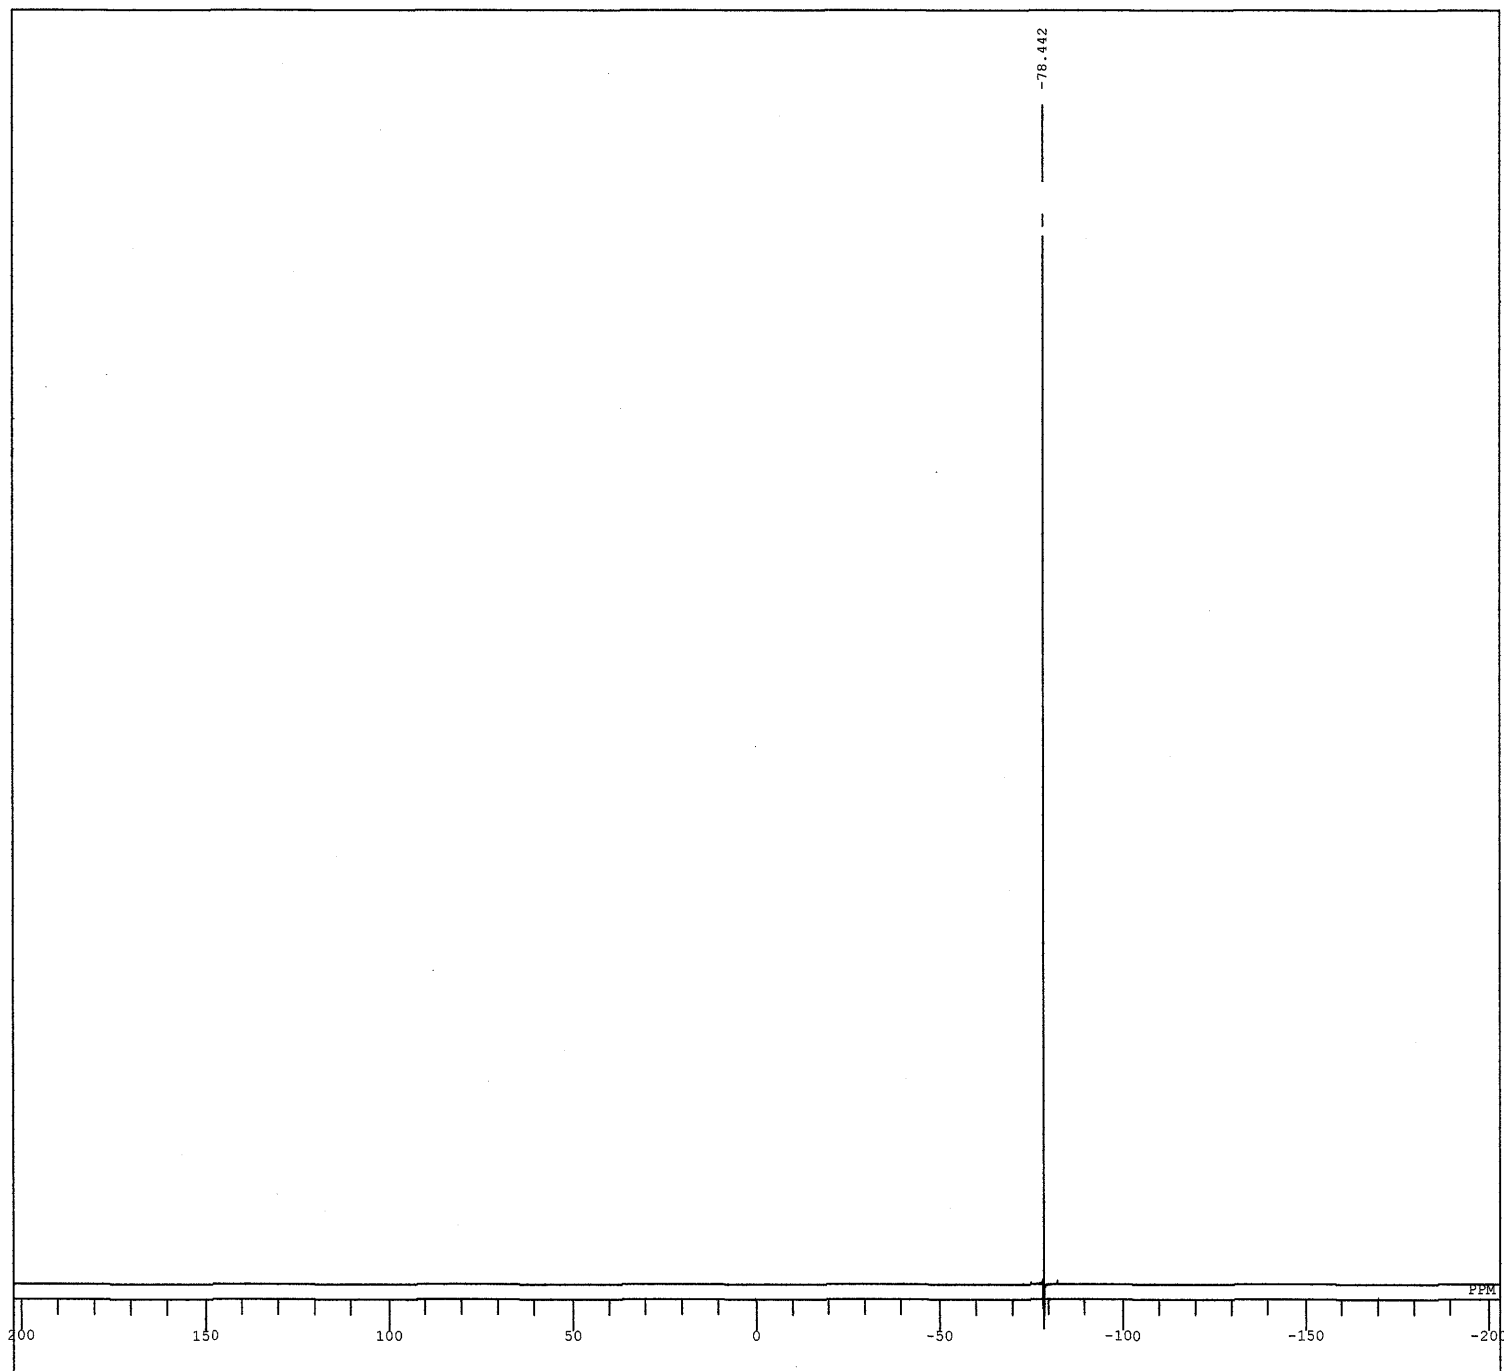

DFILE ozawa06-117 19F.jdf  
COMNT 4-Br-Ph, OH  
DATIM 30-12-2014 10:12:31  
OBNUC 19F  
EXMOD proton.jxp  
OBFRO 368.64 MHz  
OBFSE 7.63 KHz  
OBFIN 2.85 Hz  
POINT 16384  
FREQU 186567.17 Hz  
SCANS 8  
ACQTM 0.0878 sec  
PD 5.0000 sec  
PW1 3.90 usec  
IRNUC 19F  
CTEMP 21.5 c  
SLVNT CDCL3  
EXREF -164.90 ppm  
BF 0.12 Hz  
RGAIN 50

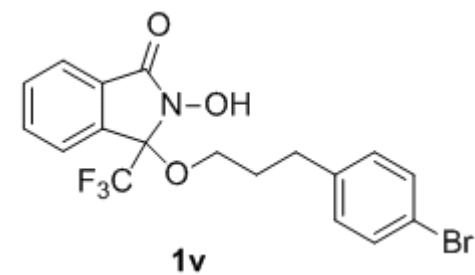

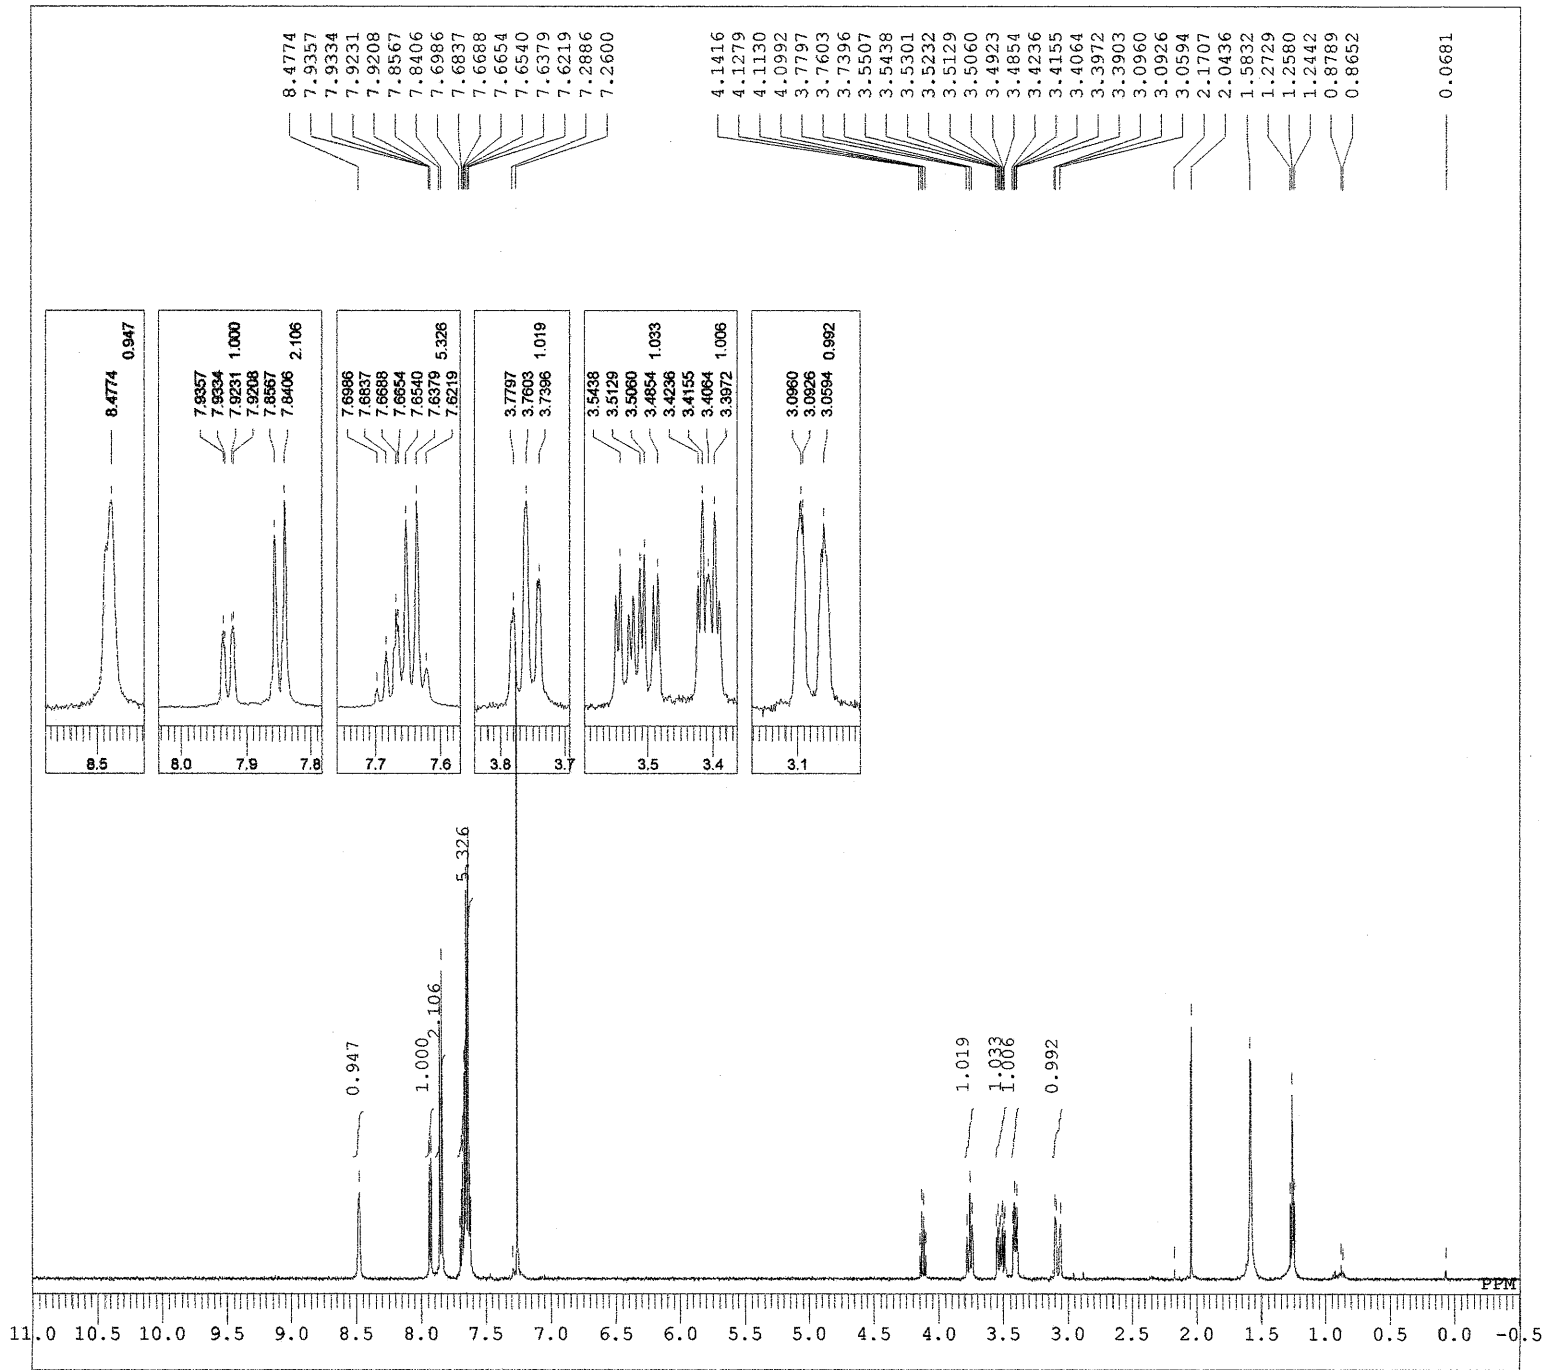

```

DFILE ozawa06-118_take2.als
COMNT PTLC 4-Br-Ph, [O]
DATIM 2014-12-27 08:23:00
OBNUC 1H
EXMOD proton.jxp
OBFREQ 500.16 MHz
OBSET 2.41 KHz
OBFIN 6.01 Hz
POINT 13107
FREQU 7507.51 Hz
SCANS 4
ACQTM 1.7459 sec
PD 5.0000 sec
PW1 5.55 usec
IRNUC 1H
CTEMP 24.0 c
SLVNT CDCl3
EXREF 7.26 ppm
BF 0.12 Hz
RGAIN 30
    
```

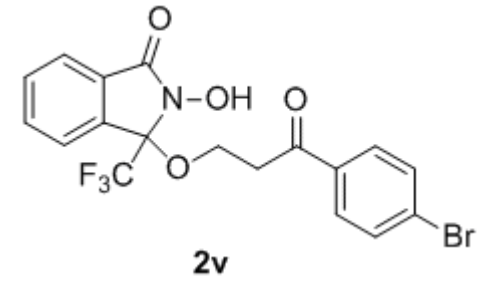

4-Br-Ph, [O]

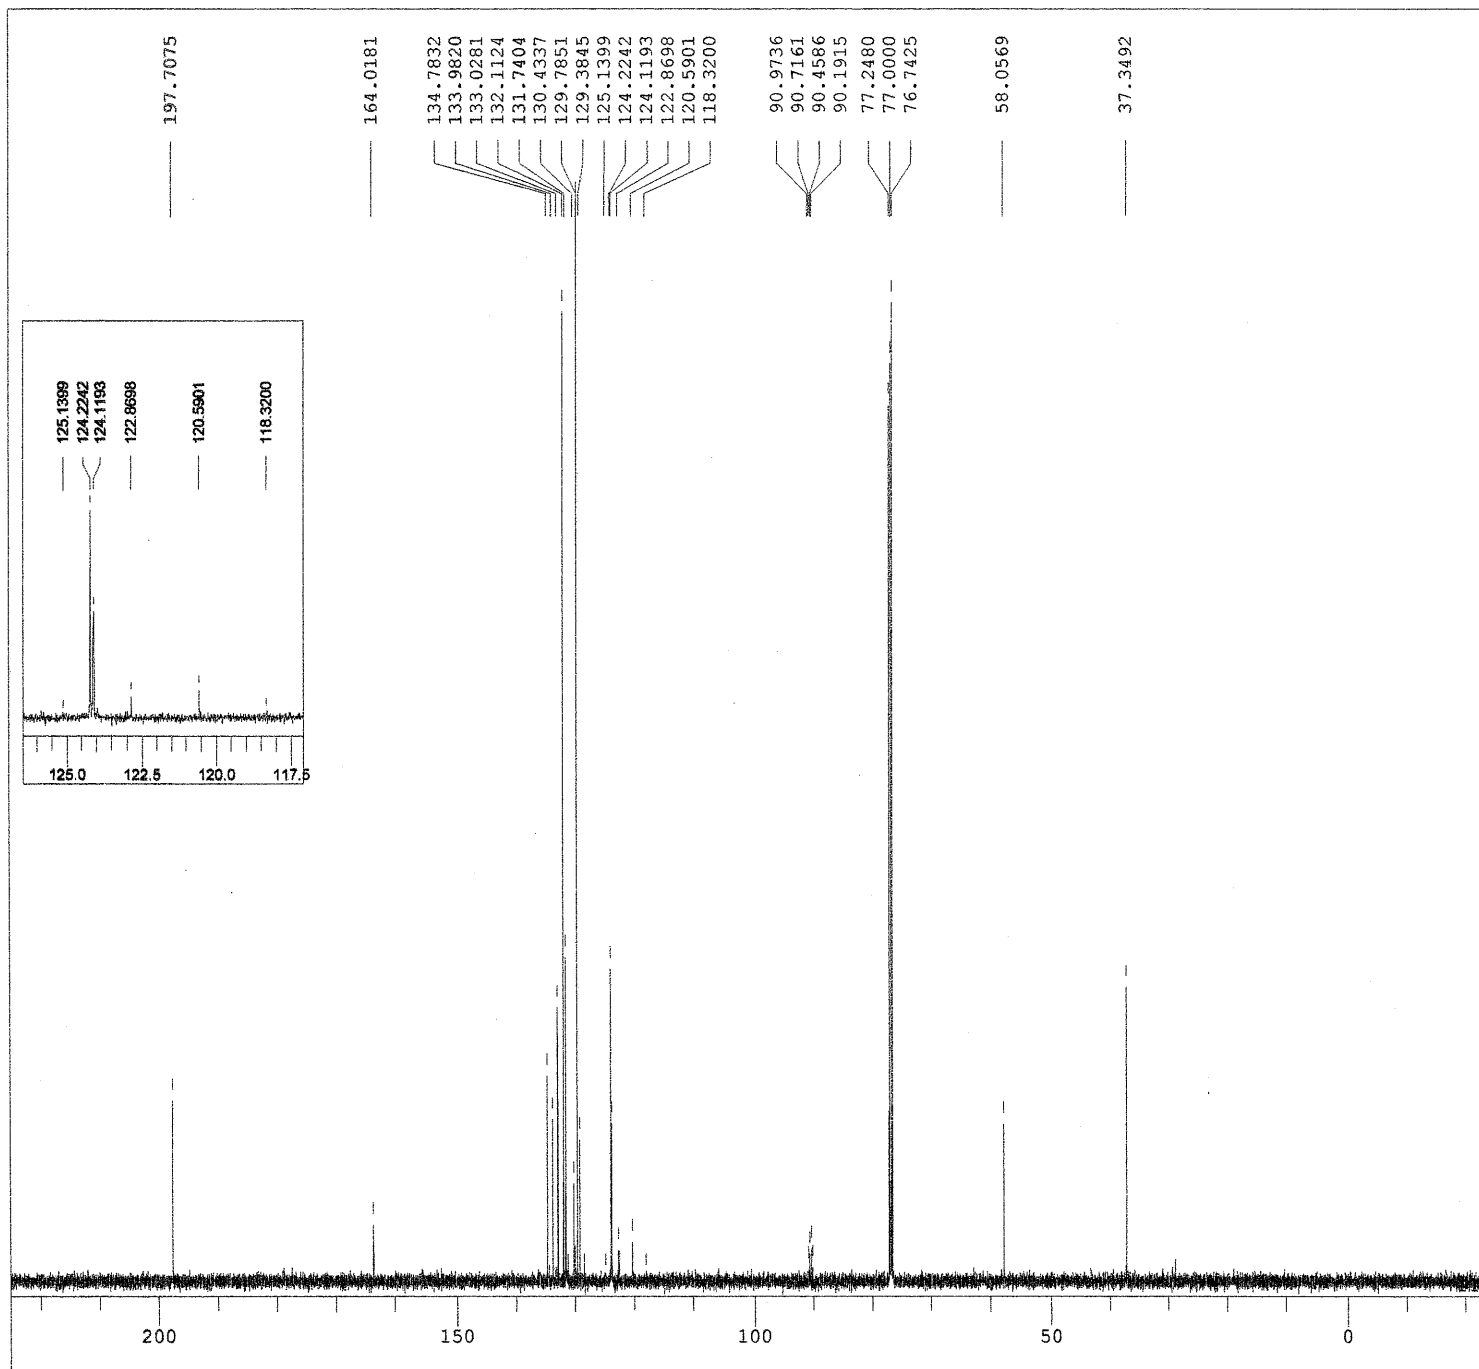

DFILE ozawa06-118\_13C.jdf  
COMNT 4-Br-Ph, [O]  
DATIM 2015-01-05 10:29:28  
OBNUC 13C  
EXMOD carbon.jxp  
OBFRQ 125.77 MHz  
OBSET 7.87 KHz  
OBFIN 4.21 Hz  
POINT 32767  
FREQU 39308.18 Hz  
SCANS 640  
ACQTM 0.8336 sec  
PD 2.0000 sec  
PW1 3.40 usec  
IRNUC 1H  
CTEMP 24.2 c  
SLVNT CDCL3  
EXREF 77.00 ppm  
BF 0.12 Hz  
RGAIN 60

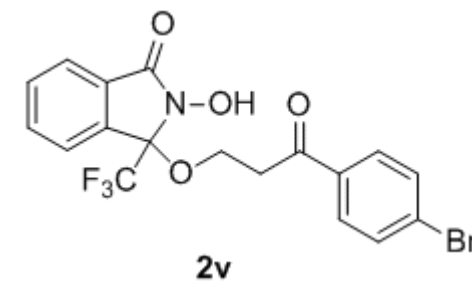

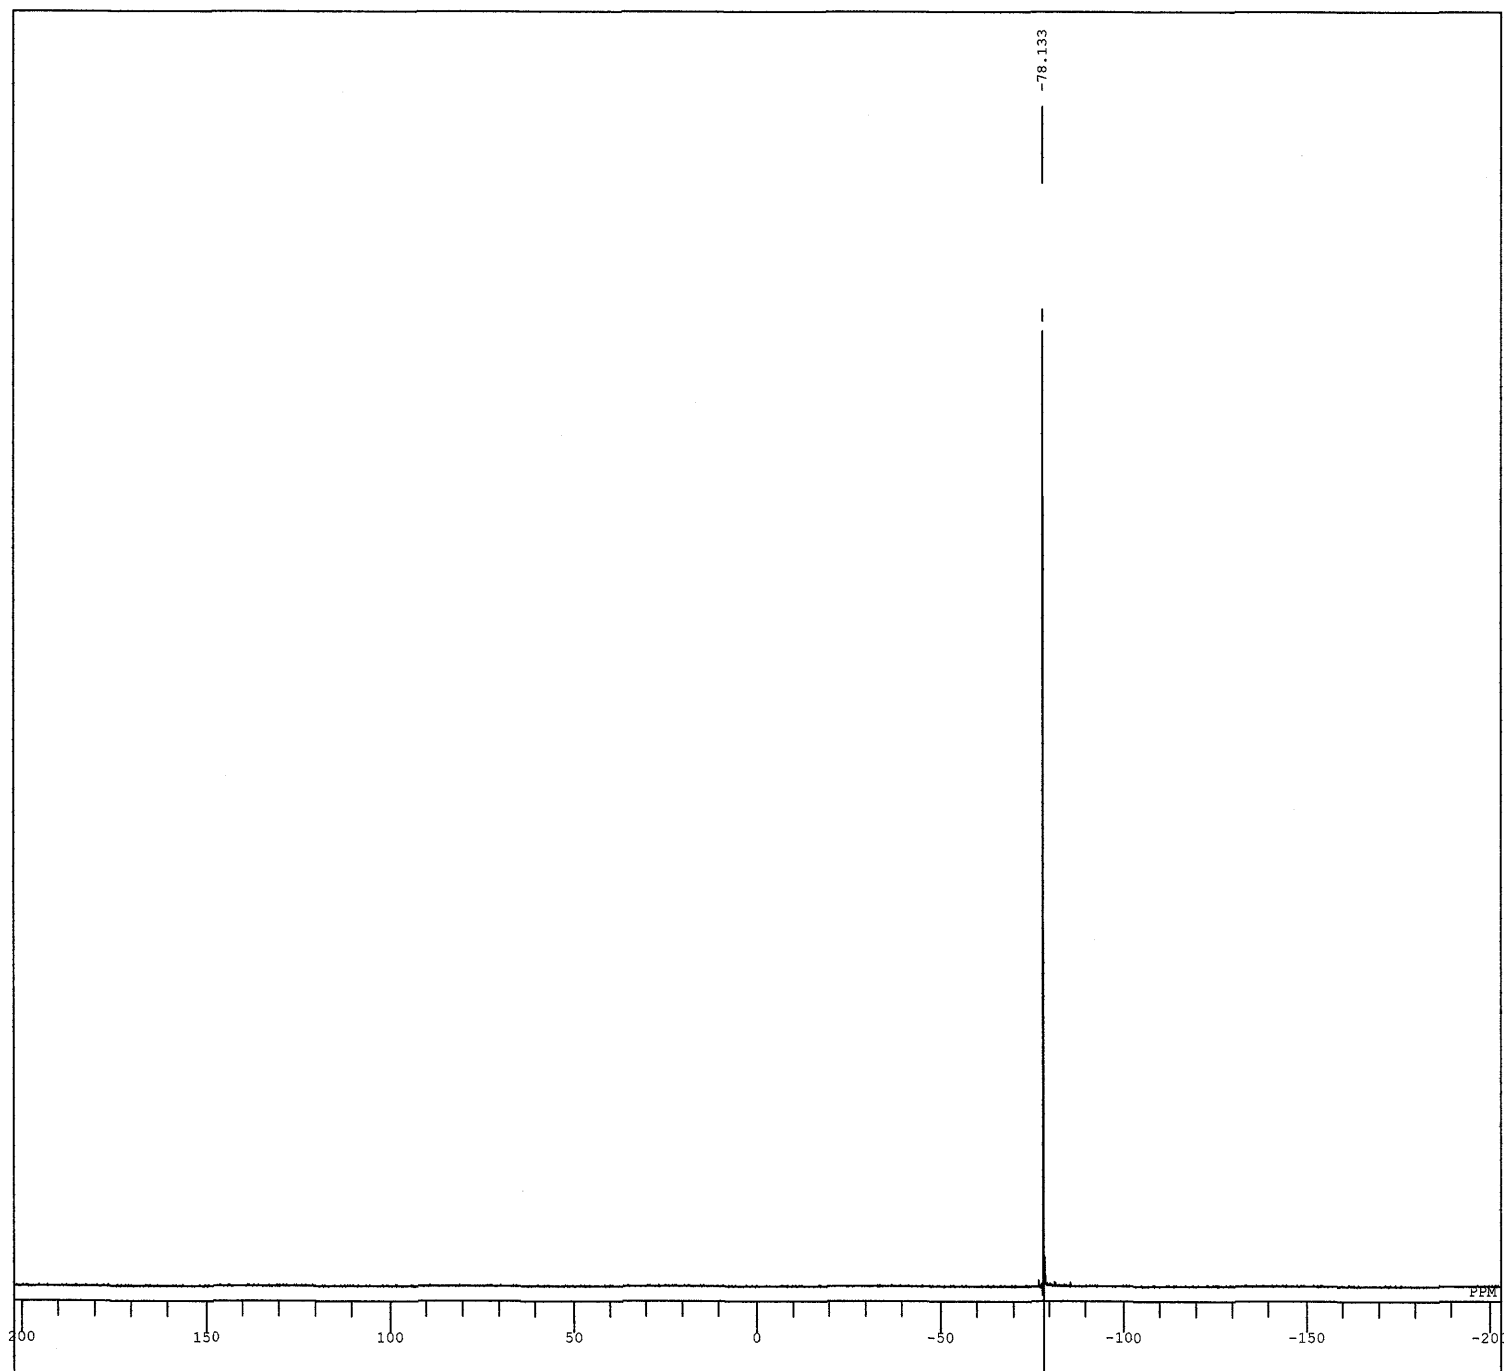

DFILE ozawa06-118\_19F.jdf  
COMNT 4-Br-Ph, [O]  
DATIM 05-01-2015 12:24:41  
OBNUC 19F  
EXMOD proton.jxp  
OBFREQ 368.64 MHz  
OBSET 7.63 KHz  
OBFIN 2.85 Hz  
POINT 16384  
FREQU 186567.17 Hz  
SCANS 4  
ACQTM 0.0878 sec  
PD 5.0000 sec  
PW1 3.90 usec  
IRNUC 19F  
CTEMP 21.5 c  
SLVNT CDCL3  
EXREF -164.90 ppm  
BF 0.12 Hz  
RGAIN 50

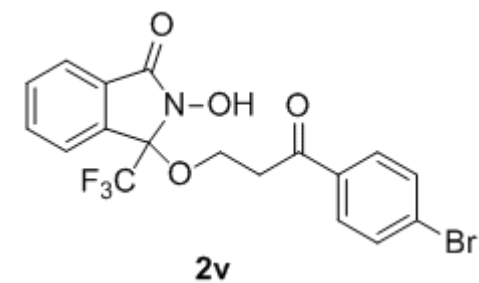

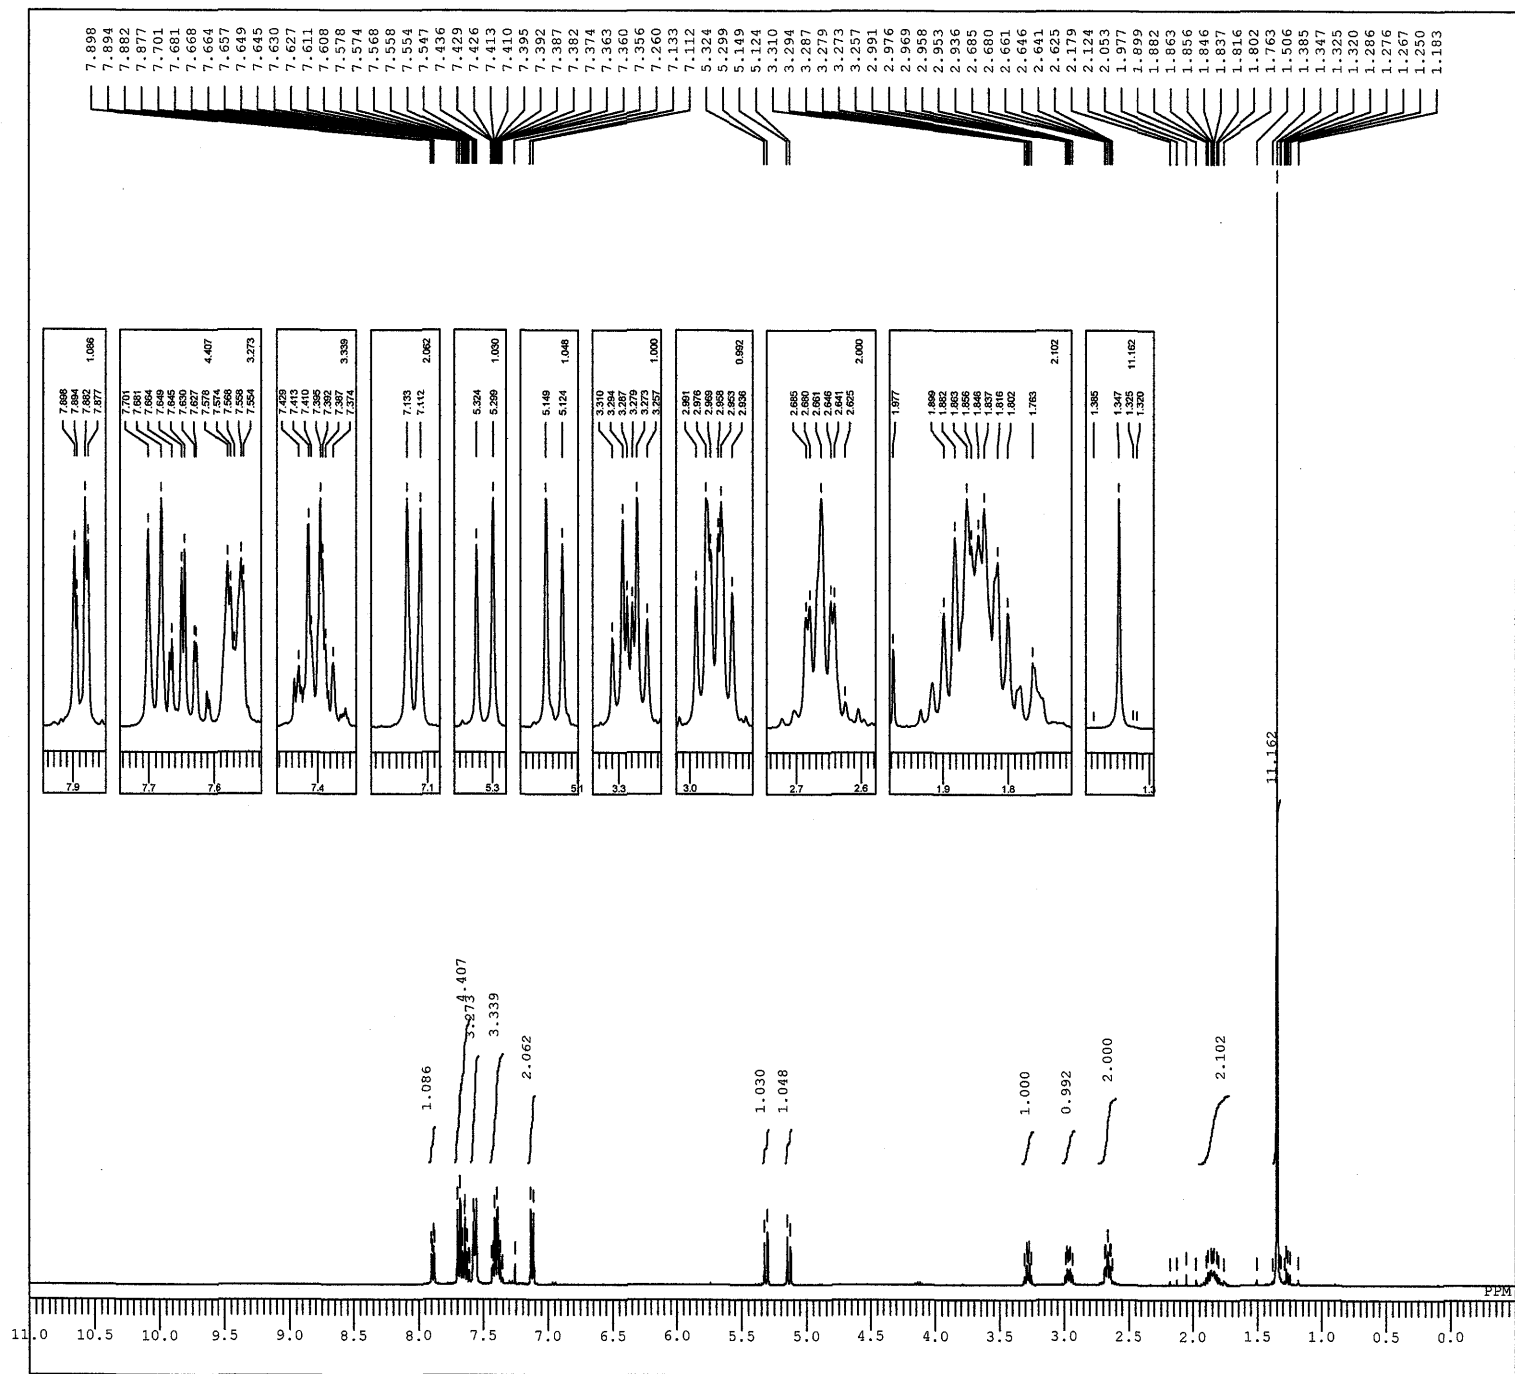

DFILE ozawa06-113 1H.jdf  
 COMNT Ph-Bpin, Bn  
 DATIM 25-12-2014 11:29:15  
 OBNUC 1H  
 EXMOD proton.jxp  
 OBFRO 391.78 MHz  
 OBSFT 8.51 KHz  
 OBFIN 3.34 Hz  
 POINT 16384  
 FREQU 7348.62 Hz  
 SCANS 8  
 ACQTM 2.2295 sec  
 PD 5.0000 sec  
 PW1 5.07 usec  
 IRNUC 1H  
 CTEMP 22.0 c  
 SLVMT CDCL3  
 EXREF 7.26 ppm  
 BF 0.12 Hz  
 RGAIN 26

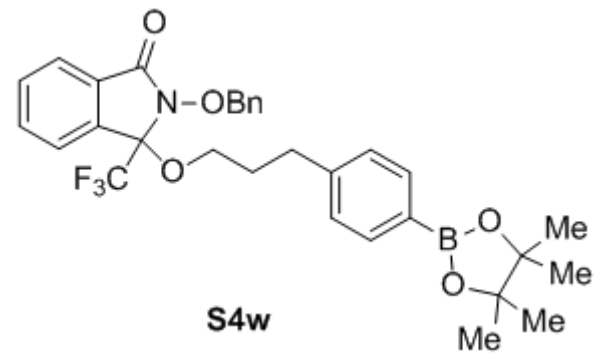

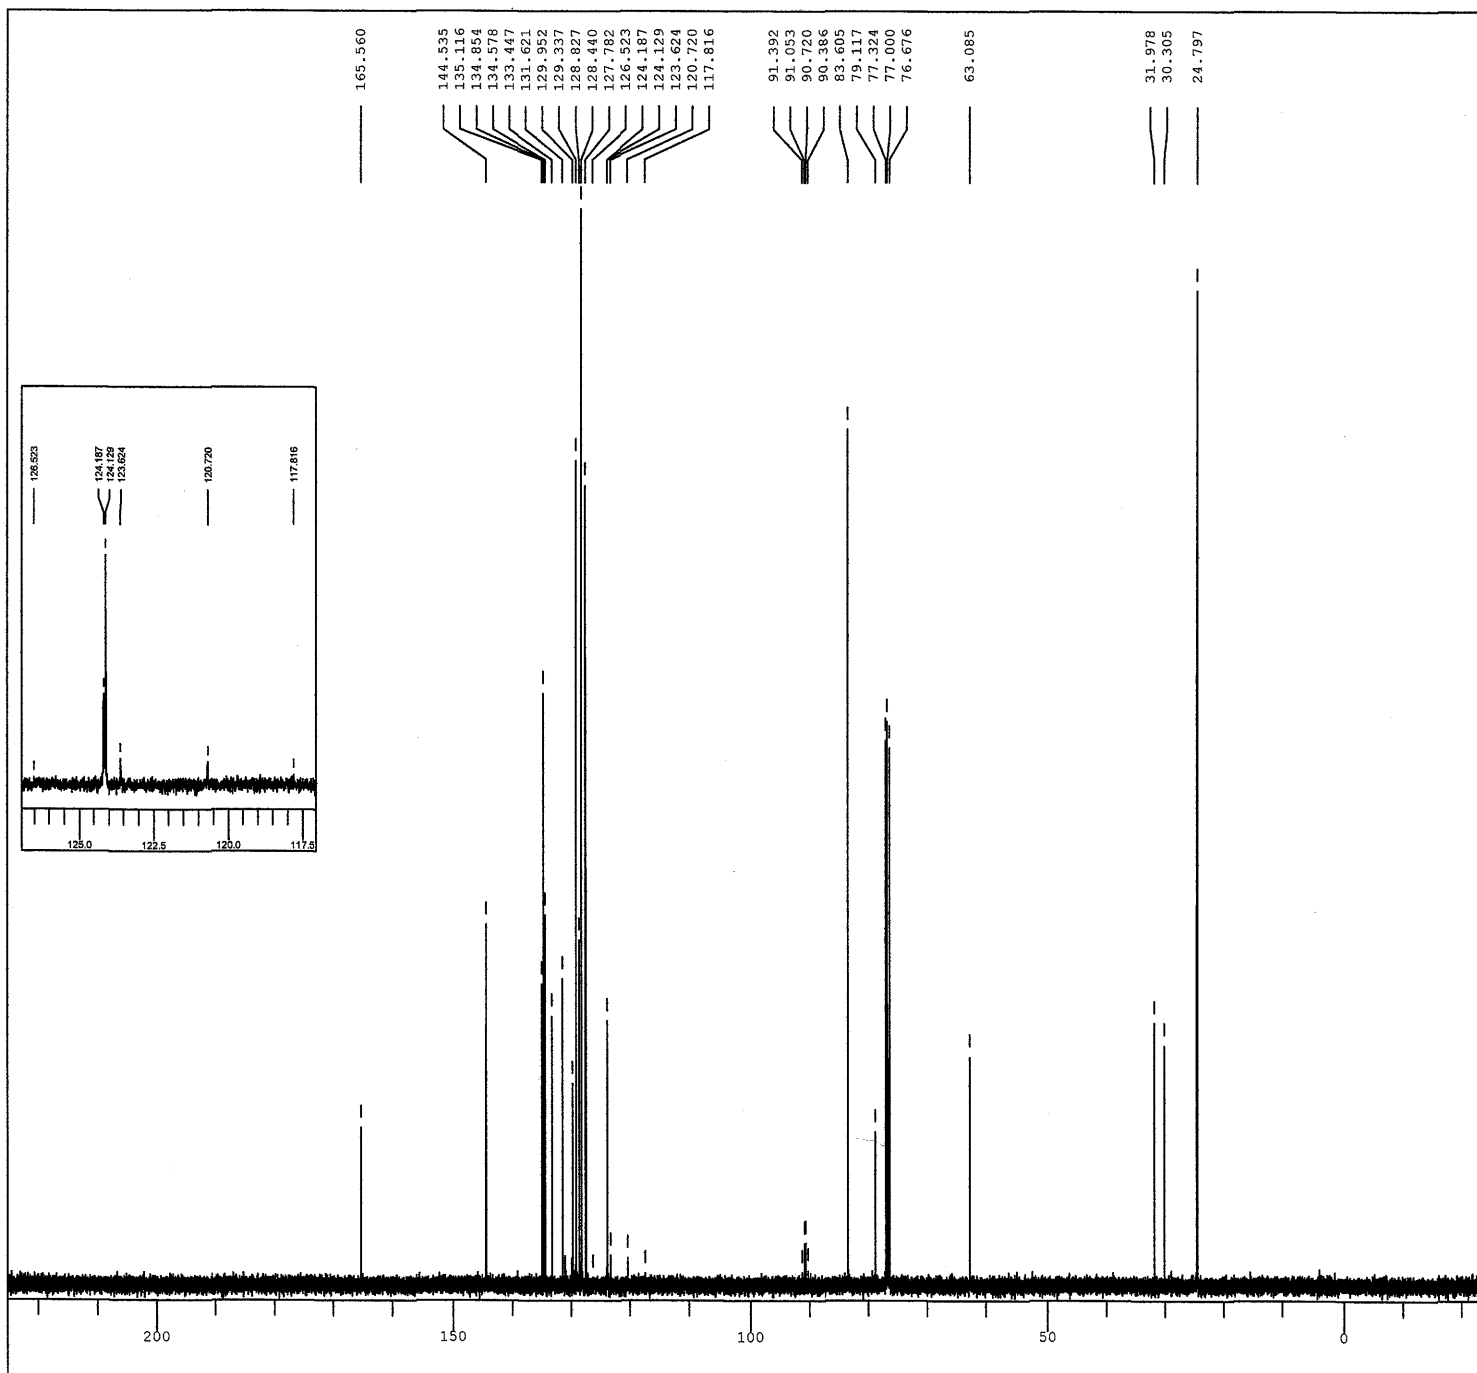

DFILE ozawa06-113 13C.jdf  
 COMNT 4-Bpin-Ph, Bn  
 DATIM 25-12-2014 11:32:48  
 OBNUC 13C  
 EXMOD carbon.jxp  
 OBFREQ 98.52 MHz  
 OBSETE 4.64 KHz  
 OBFIN 8.74 Hz  
 POINT 65535  
 FREQU 30788.18 Hz  
 SCANS 180  
 ACQTM 2.1286 sec  
 PD 2.0000 sec  
 PW1 3.07 usec  
 IRNUC 1H  
 CTEMP 22.3 c  
 SLVNT CDCL3  
 EXREF 77.00 ppm  
 BF 0.12 Hz  
 RGAIN 60

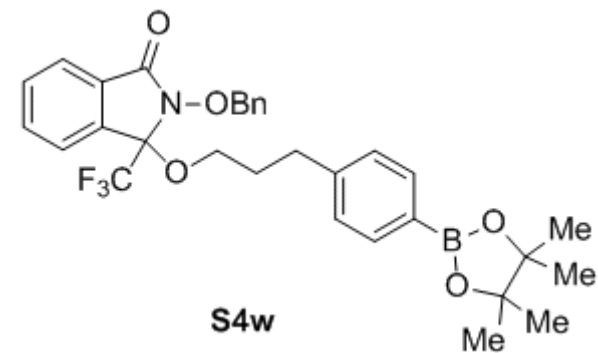

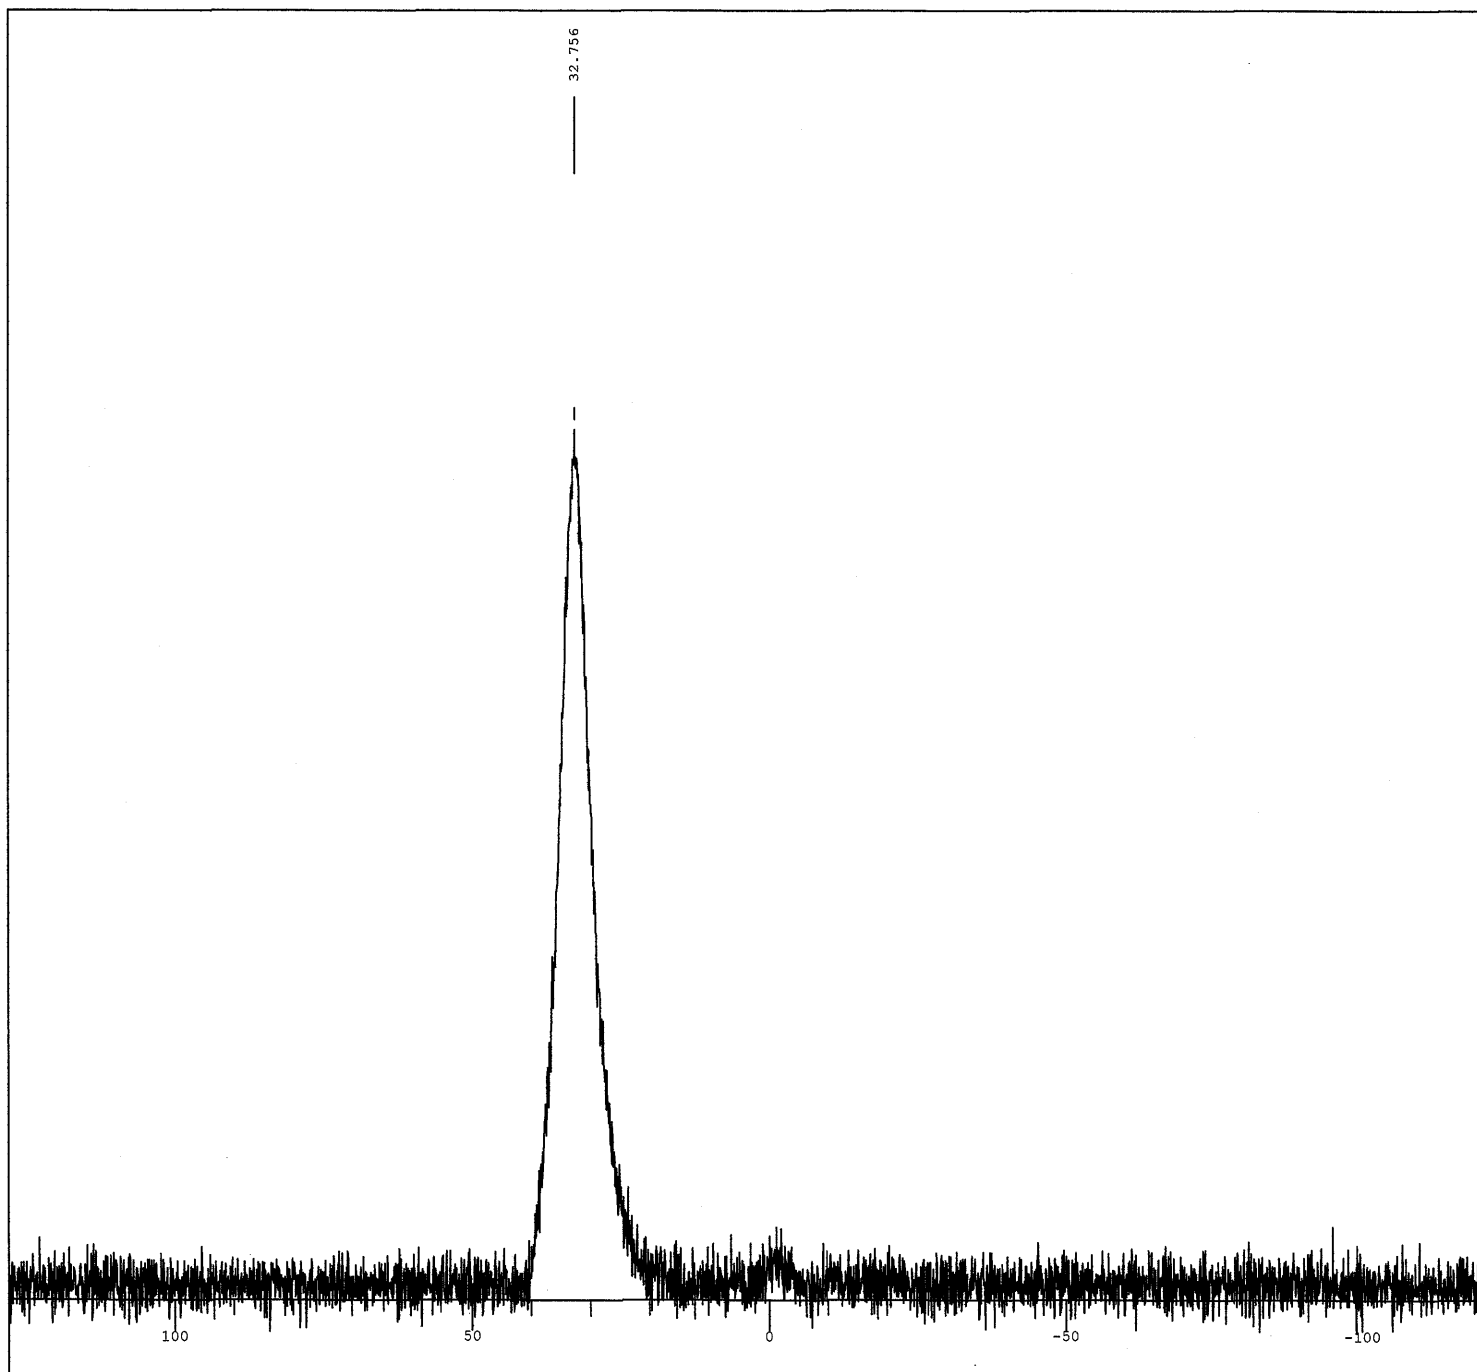

DFILE ozawa06-113 11B.jdf  
COMNT 4-Bpin-Ph, Bn  
DATIM 25-12-2014 11:24:53  
OBNUC 11B  
EXMOD carbon.jxp  
OBFREQ 125.70 MHz  
OBSET 0.81 KHz  
OBFIN 3.25 Hz  
POINT 4095  
FREQU 39308.18 Hz  
SCANS 200  
ACQTM 0.1042 sec  
PD 80.0000 sec  
PW1 3.98 usec  
IRNUC 1H  
CTEMP 22.2 c  
SLVNT CDCL3  
EXREF 31.00 ppm  
BF 0.12 Hz  
RGAIN 44

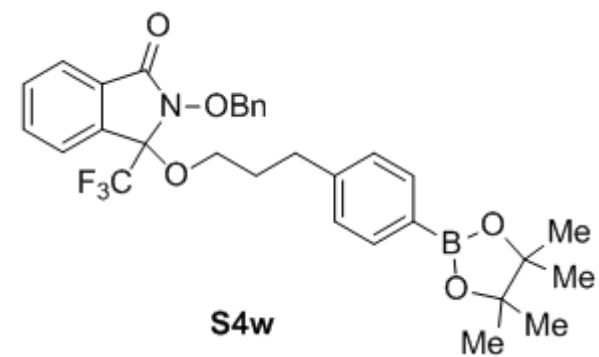



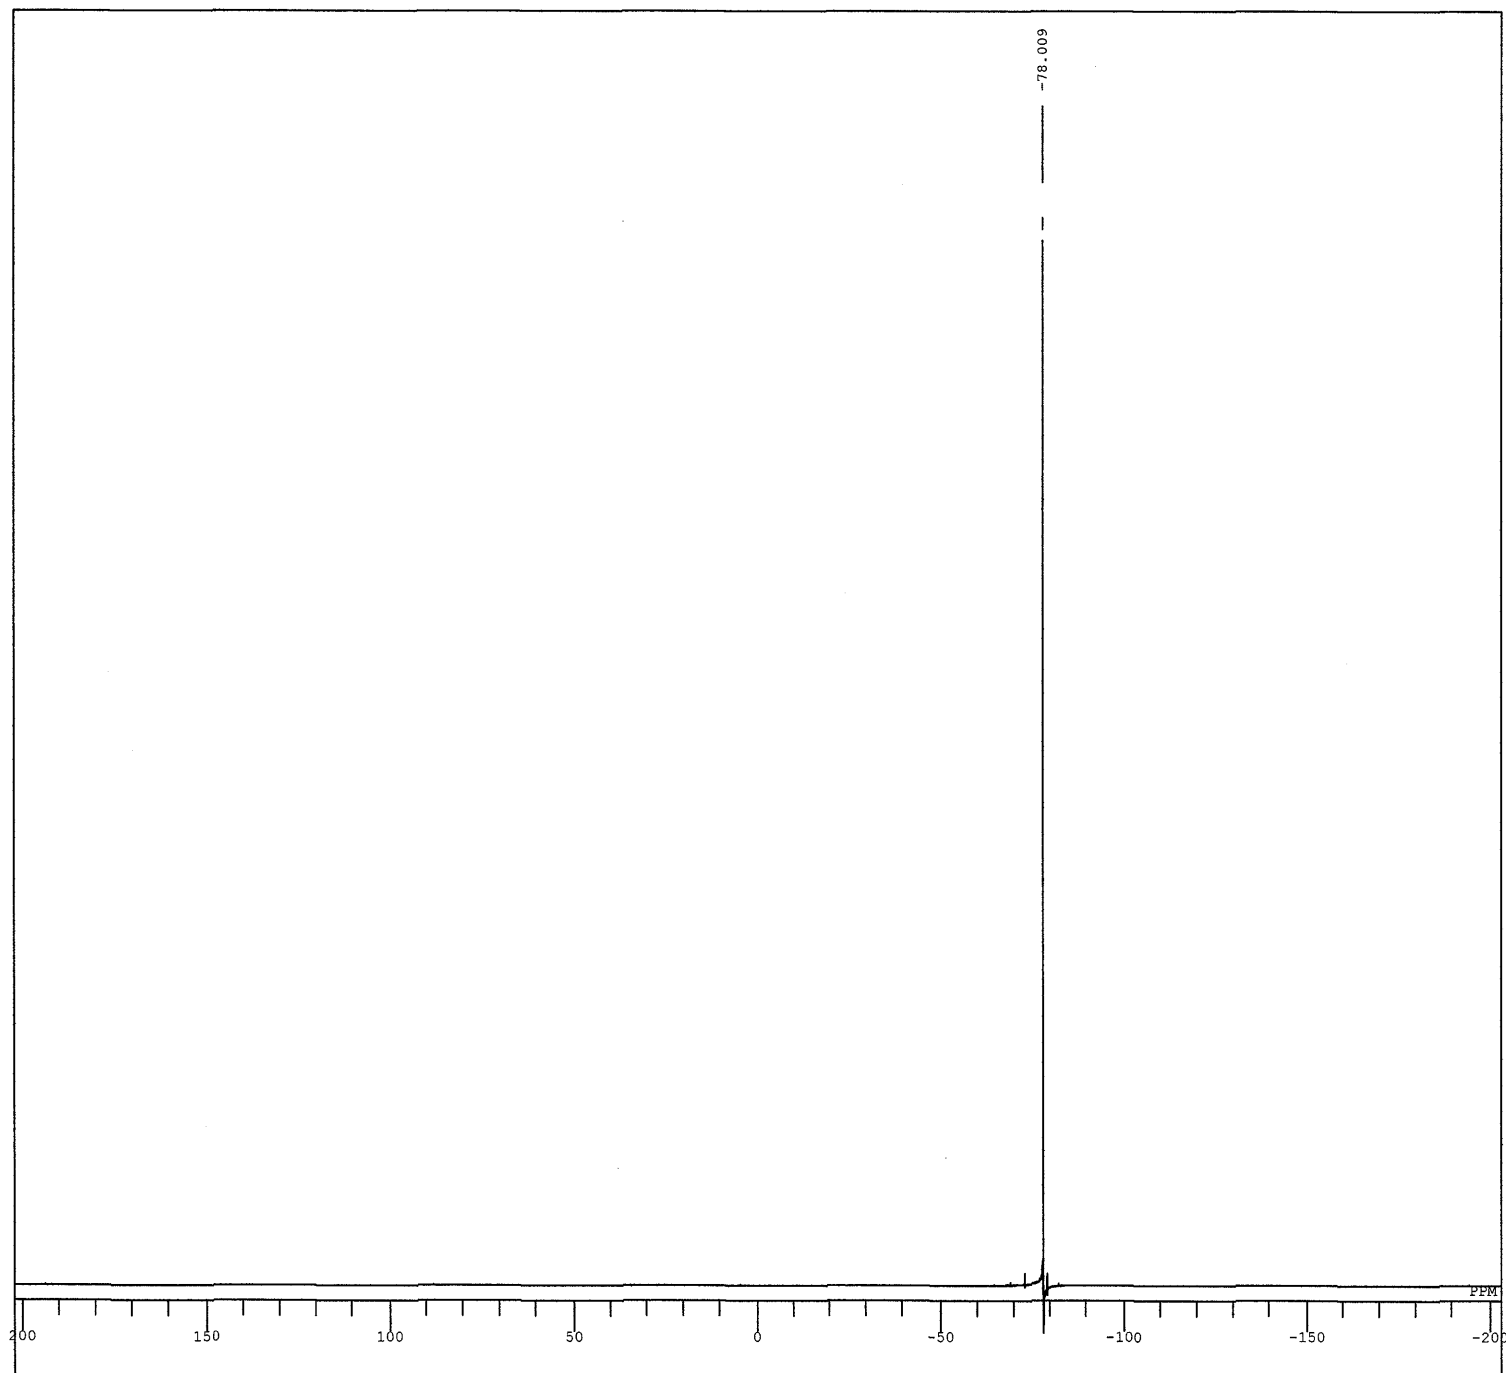

DFILE ozawa06-113\_19F.jdf  
COMNT Ph-Bpin, Bn  
DATIM 25-12-2014 11:26:56  
OBNUC 19F  
EXMOD proton.jxp  
OBFRO 368.64 MHz  
OBSEF 7.63 KHz  
OBFIN 2.85 Hz  
POINT 16384  
FREOU 186567.17 Hz  
SCANS 4  
ACQTM 0.0878 sec  
PD 5.0000 sec  
PW1 3.90 usec  
IRNUC 19F  
CTEMP 22.1 c  
SLVNT CDCL3  
EXREF -164.90 ppm  
BF 0.12 Hz  
RGAIN 48

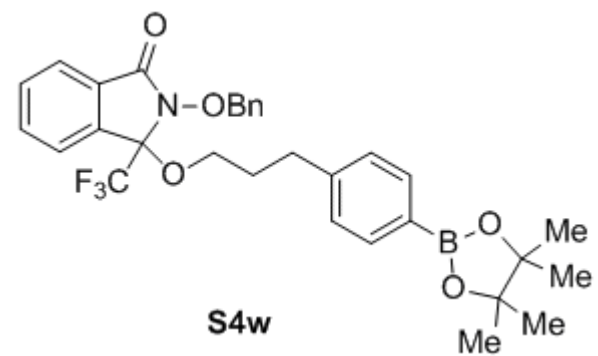

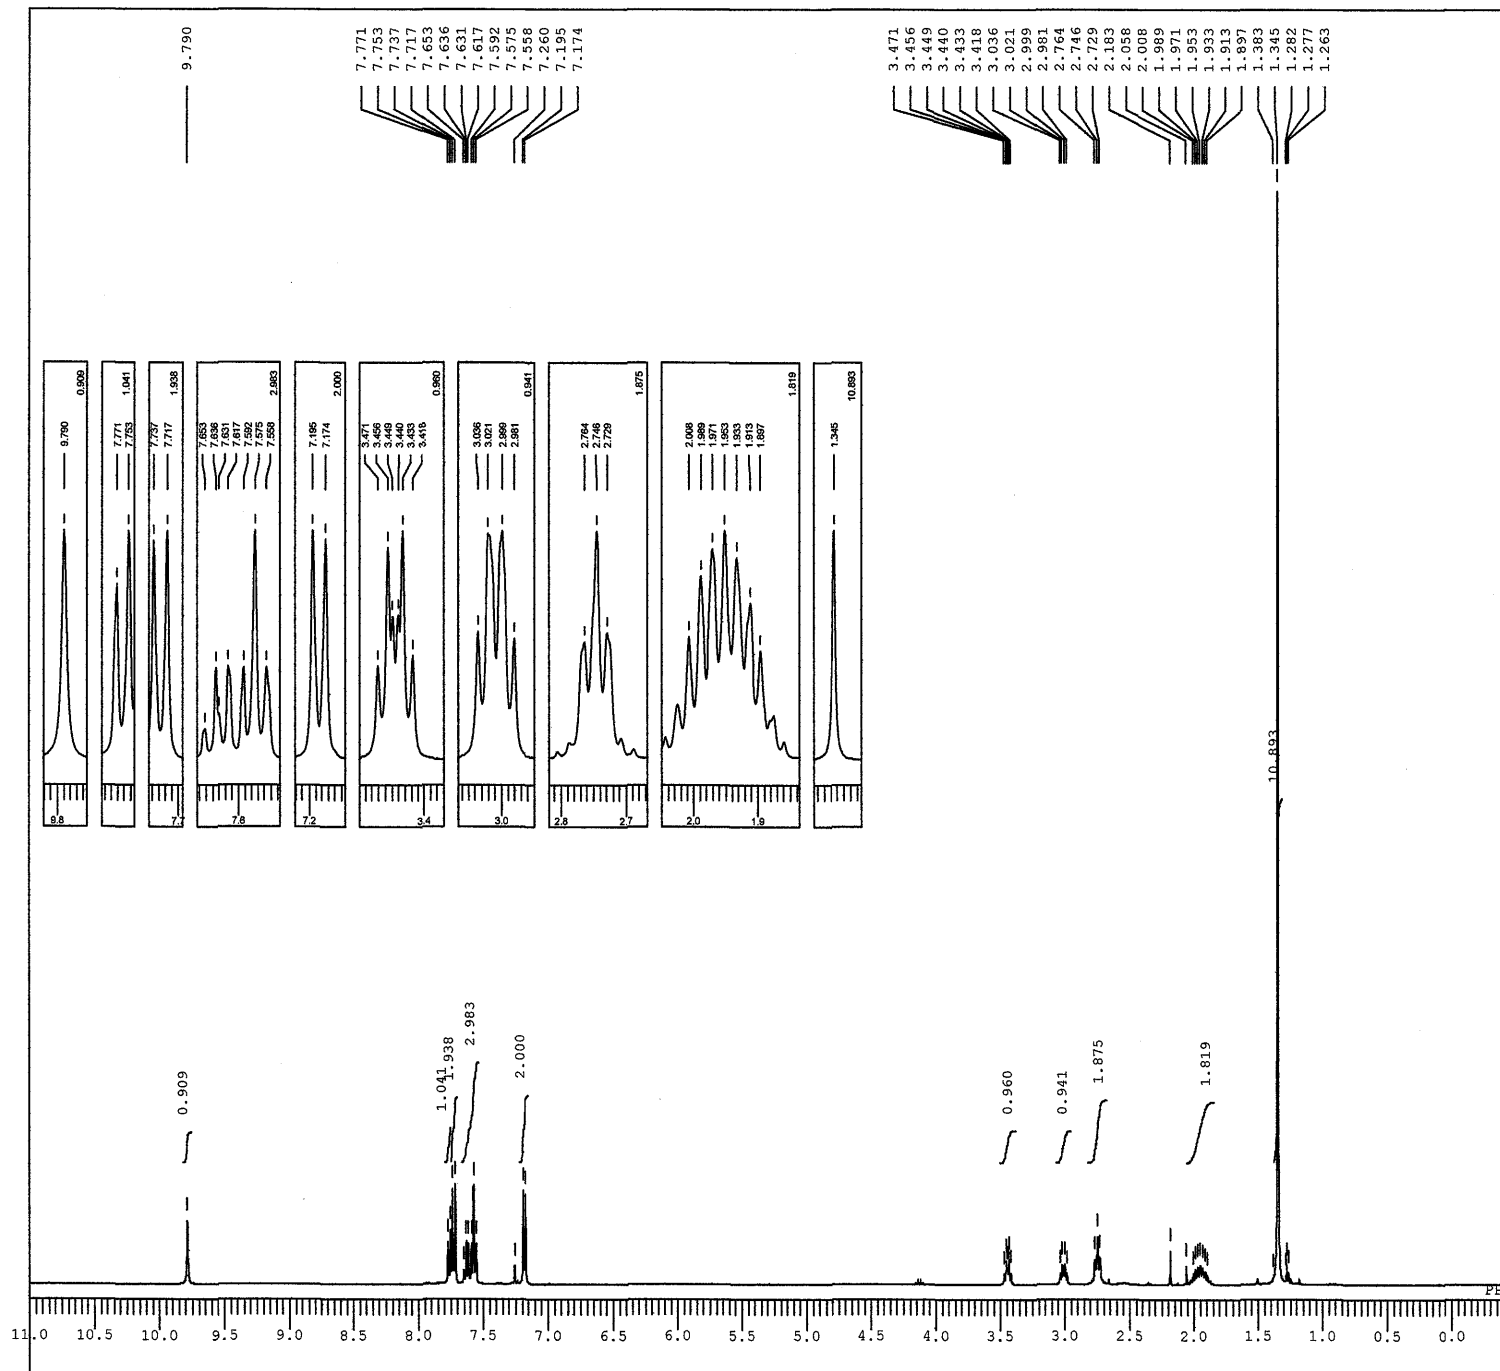

DFILE ozawa06-120 1H.jdf  
 COMNT 4-Bpin-Ph, OH  
 DATIM 27-12-2014 11:38:22  
 OBNUC 1H  
 EXMOD proton.jxp  
 OBFRO 391.78 MHz  
 OBSET 8.51 KHz  
 OBFIN 3.34 Hz  
 POINT 16384  
 FREQU 7348.62 Hz  
 SCANS 8  
 ACQTM 2.2295 sec  
 PD 5.0000 sec  
 PW1 5.07 usec  
 IRNUC 1H  
 CTEMP 21.9 c  
 SLVNT CDCL3  
 EXREF 7.26 ppm  
 BF 0.12 Hz  
 RGAIN 26

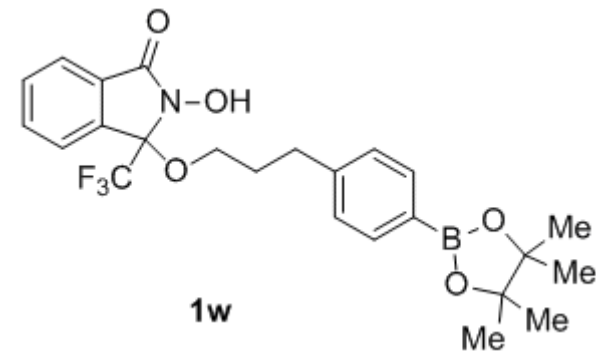

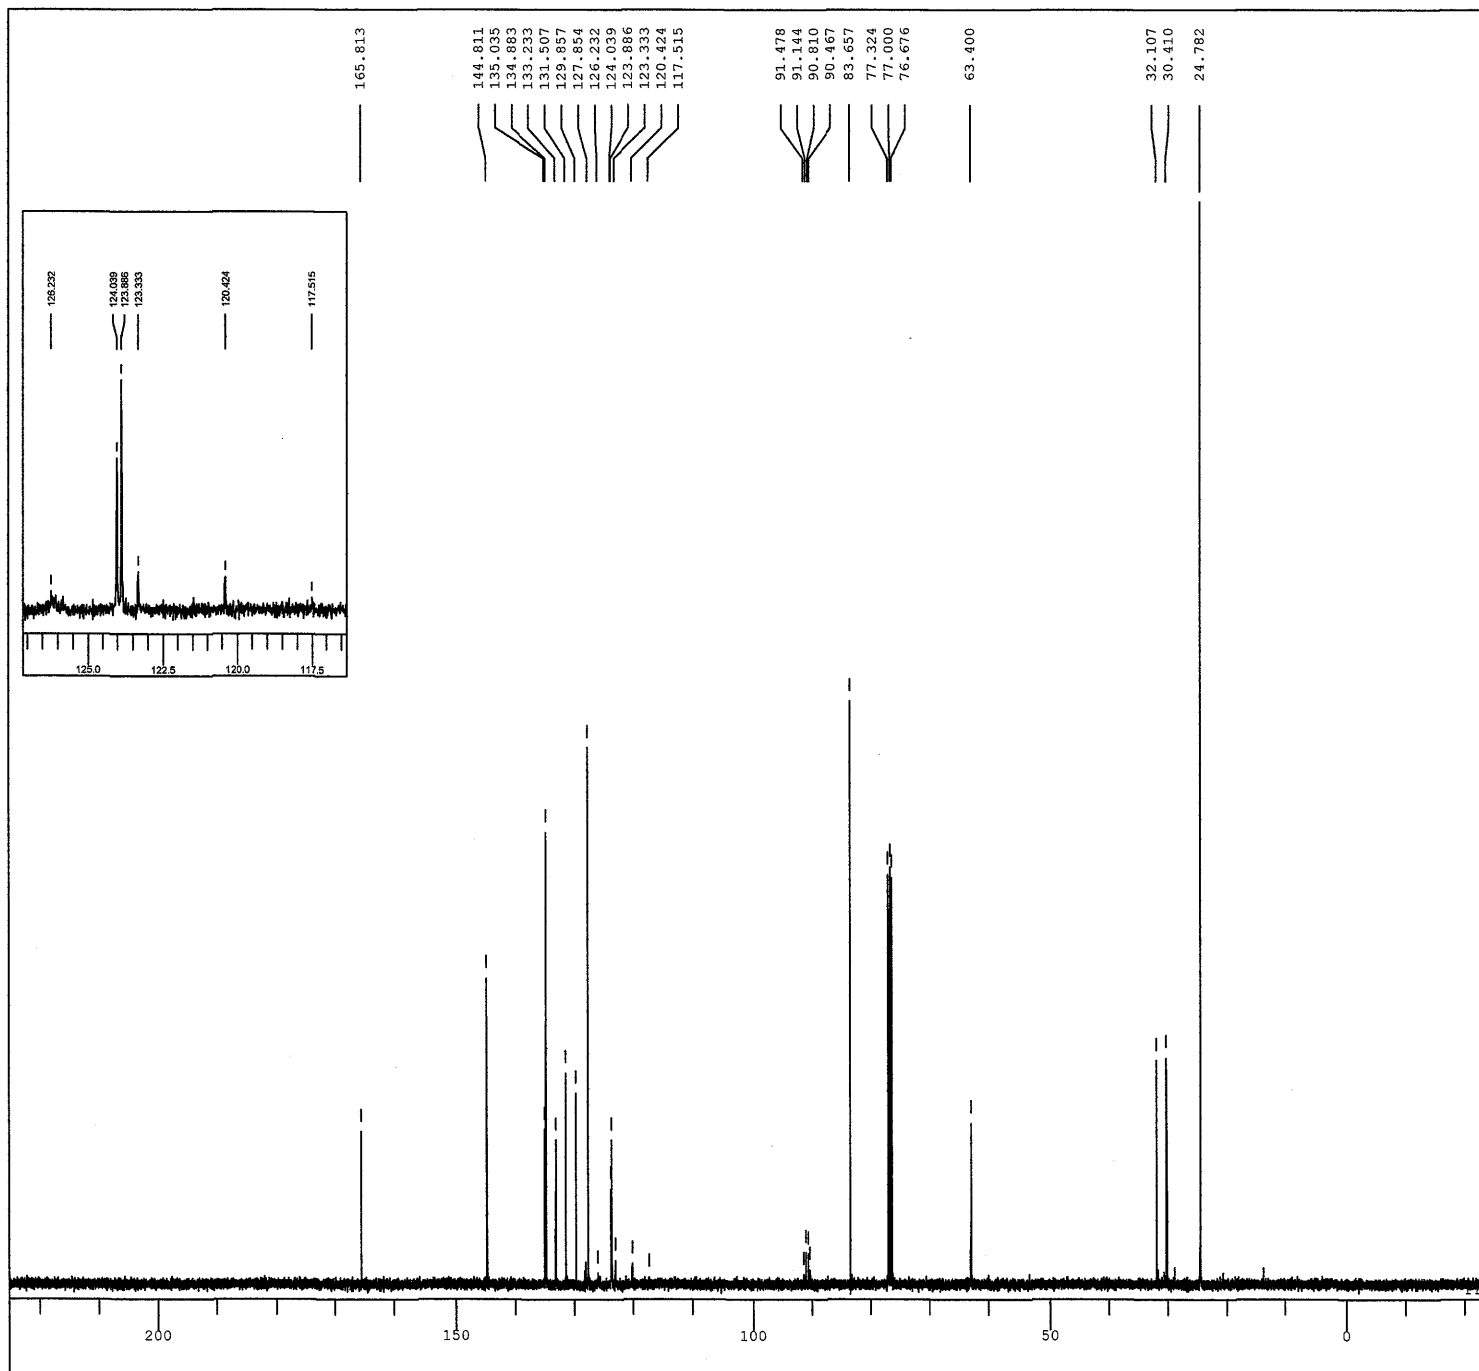

DFILE ozawa06-120\_13C.jdf  
 COMNT 4-Bpin-Ph, OH  
 DATIM 27-12-2014 11:40:58  
 OBNUC 13C  
 EXMOD carbon.jxp  
 OBFREQ 98.52 MHz  
 OBSETE 4.64 KHz  
 OBFIN 8.74 Hz  
 POINT 32767  
 FREQU 30788.18 Hz  
 SCANS 320  
 ACQTM 1.0643 sec  
 PD 2.0000 sec  
 PW1 3.07 usec  
 IRNUC 1H  
 CTEMP 22.1 c  
 SLVNT CDCL3  
 EXREF 77.00 ppm  
 BF 0.12 Hz  
 RGAIN 60

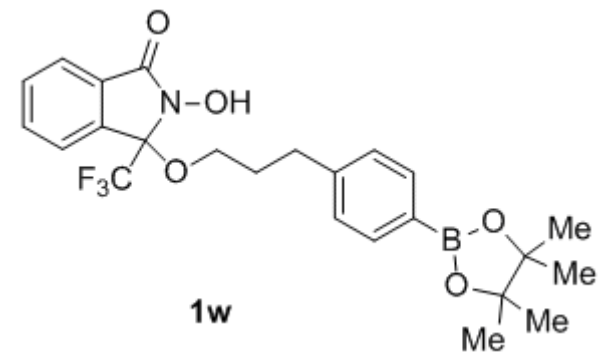

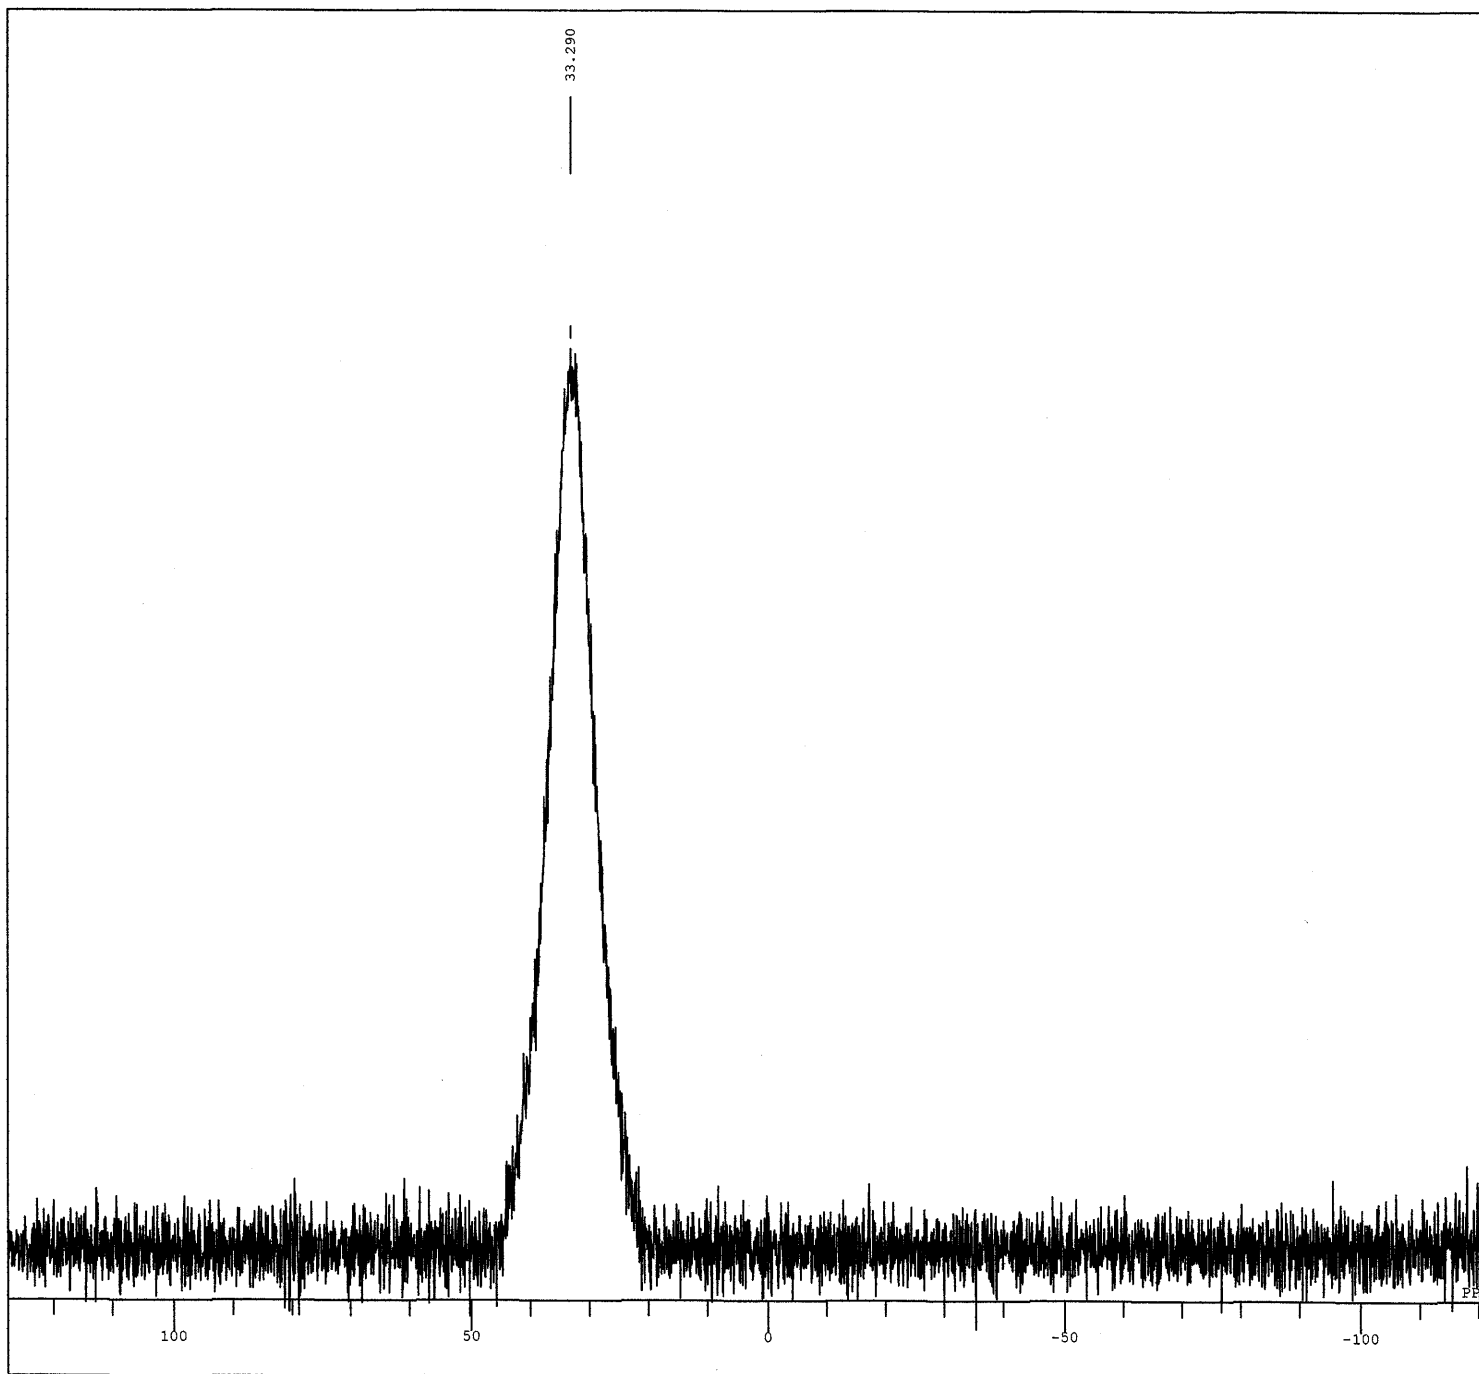

DFILE ozawa06-120\_11B.jdf  
COMNT 4-Bpin-Ph, OH  
DATIM 27-12-2014 11:34:01  
OBNUC 11B  
EXMOD carbon.jxp  
OBFRO 125.70 MHz  
OBFSE 0.81 KHz  
OBFIN 3.25 Hz  
POINT 4095  
FREQU 39308.18 Hz  
SCANS 200  
ACQTM 0.1042 sec  
PD 80.0000 sec  
PW1 3.98 usec  
IRNUC 1H  
CTEMP 21.7 c  
SLVNT CDCL3  
EXREF 31.00 ppm  
BF 0.12 Hz  
RGAIN 56

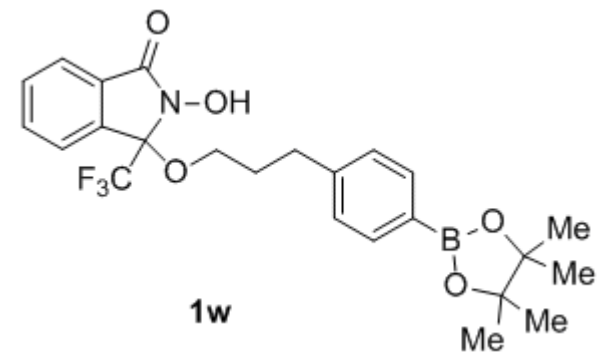

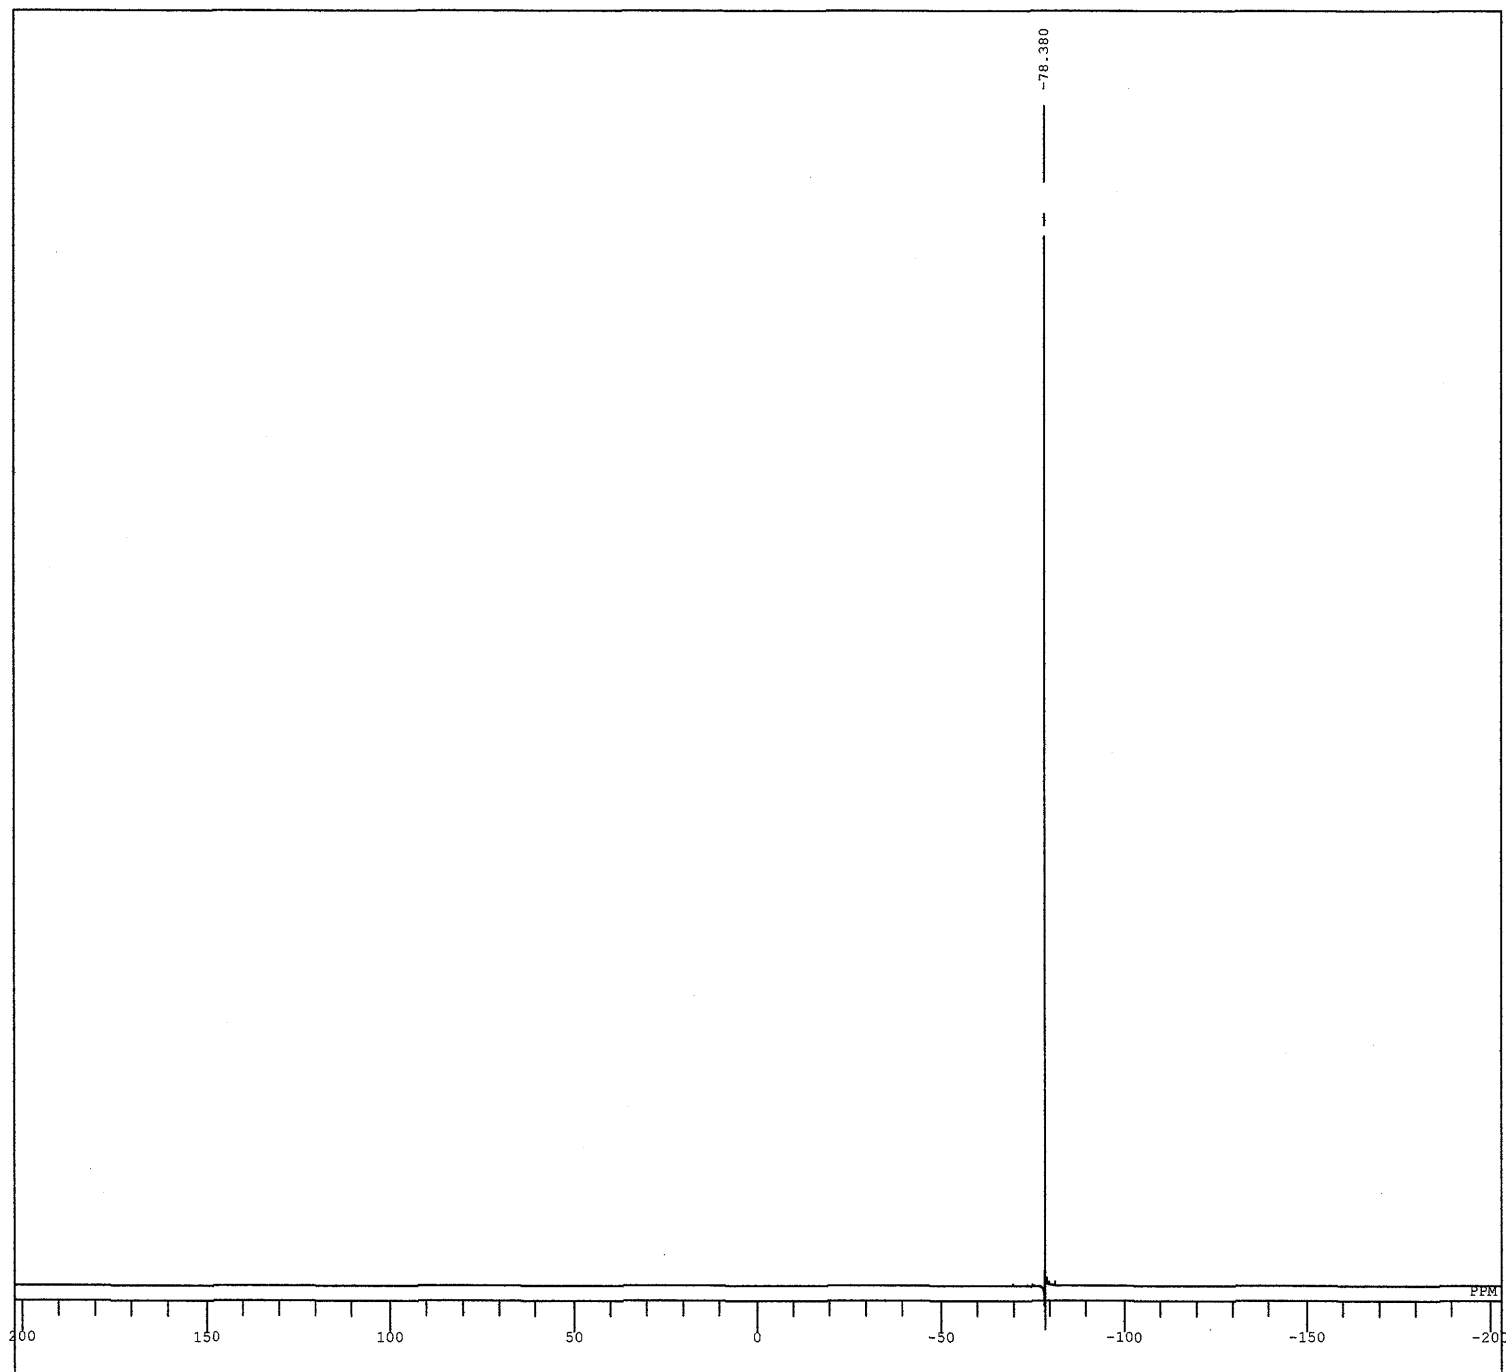

DFILE ozawa06-120 19F.jdf  
COMNT 4-Bpin-Ph, OH  
DATIM 27-12-2014 11:36:05  
OBNUC 19F  
EXMOD proton.jxp  
OBFRO 368.64 MHz  
OBFSE 7.63 KHz  
OBFIN 2.85 Hz  
POINT 16384  
FREQU 186567.17 Hz  
SCANS 4  
ACQTM 0.0878 sec  
PD 5.0000 sec  
PW1 3.90 usec  
IRNUC 19F  
CTEMP 21.8 c  
SLVNT CDCL3  
EXREF -164.90 ppm  
BF 0.12 Hz  
RGAIN 46

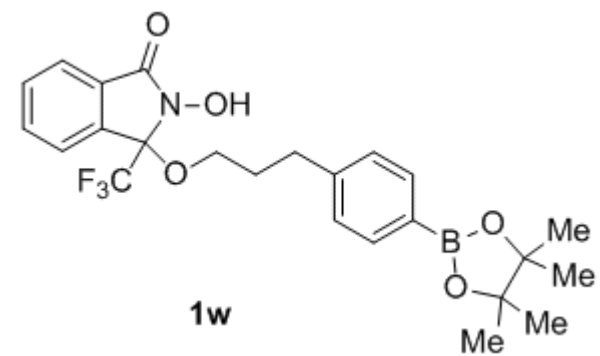

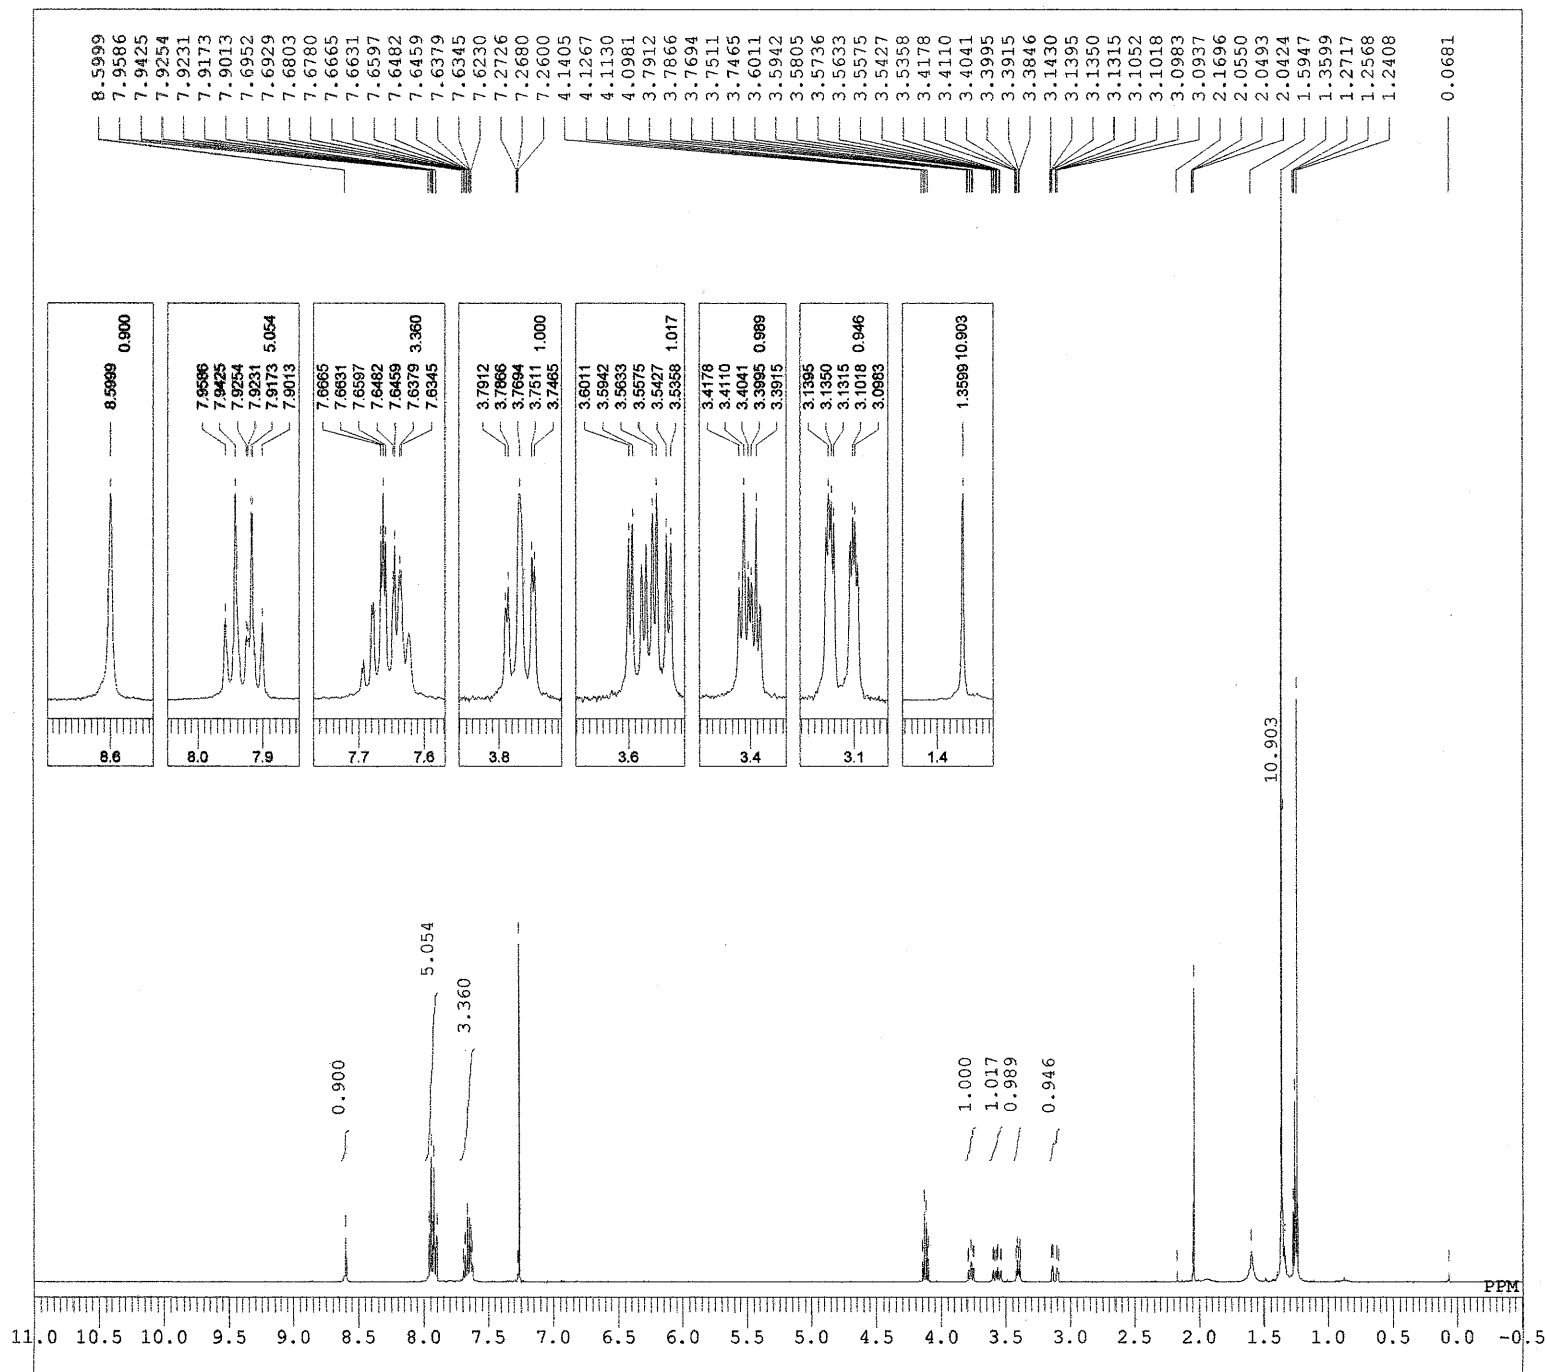

DFILE ozawa06-121.als  
 COMNT PTLC, 4-Bpin-Ph  
 DATIM 2014-12-27 15:25:04  
 OBNUC 1H  
 EXMOD proton.jxp  
 OBFREQ 500.16 MHz  
 OBSET 2.41 KHz  
 OBFIN 6.01 Hz  
 POINT 13107  
 FREQU 7507.51 Hz  
 SCANS 8  
 ACQTM 1.7459 sec  
 PD 5.0000 sec  
 PW1 5.55 usec  
 IRNUC 1H  
 CTEMP 24.6 c  
 SLVNT CDCL3  
 EXREF 7.26 ppm  
 BF 0.12 Hz  
 RGAIN 32

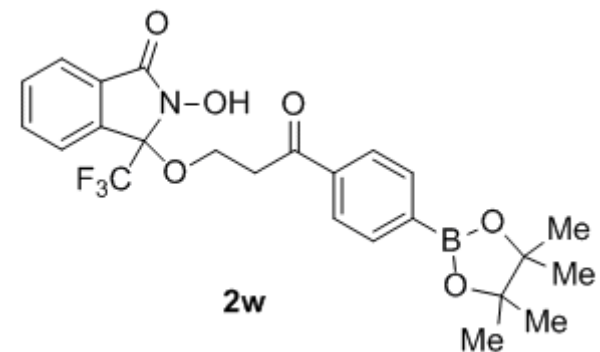

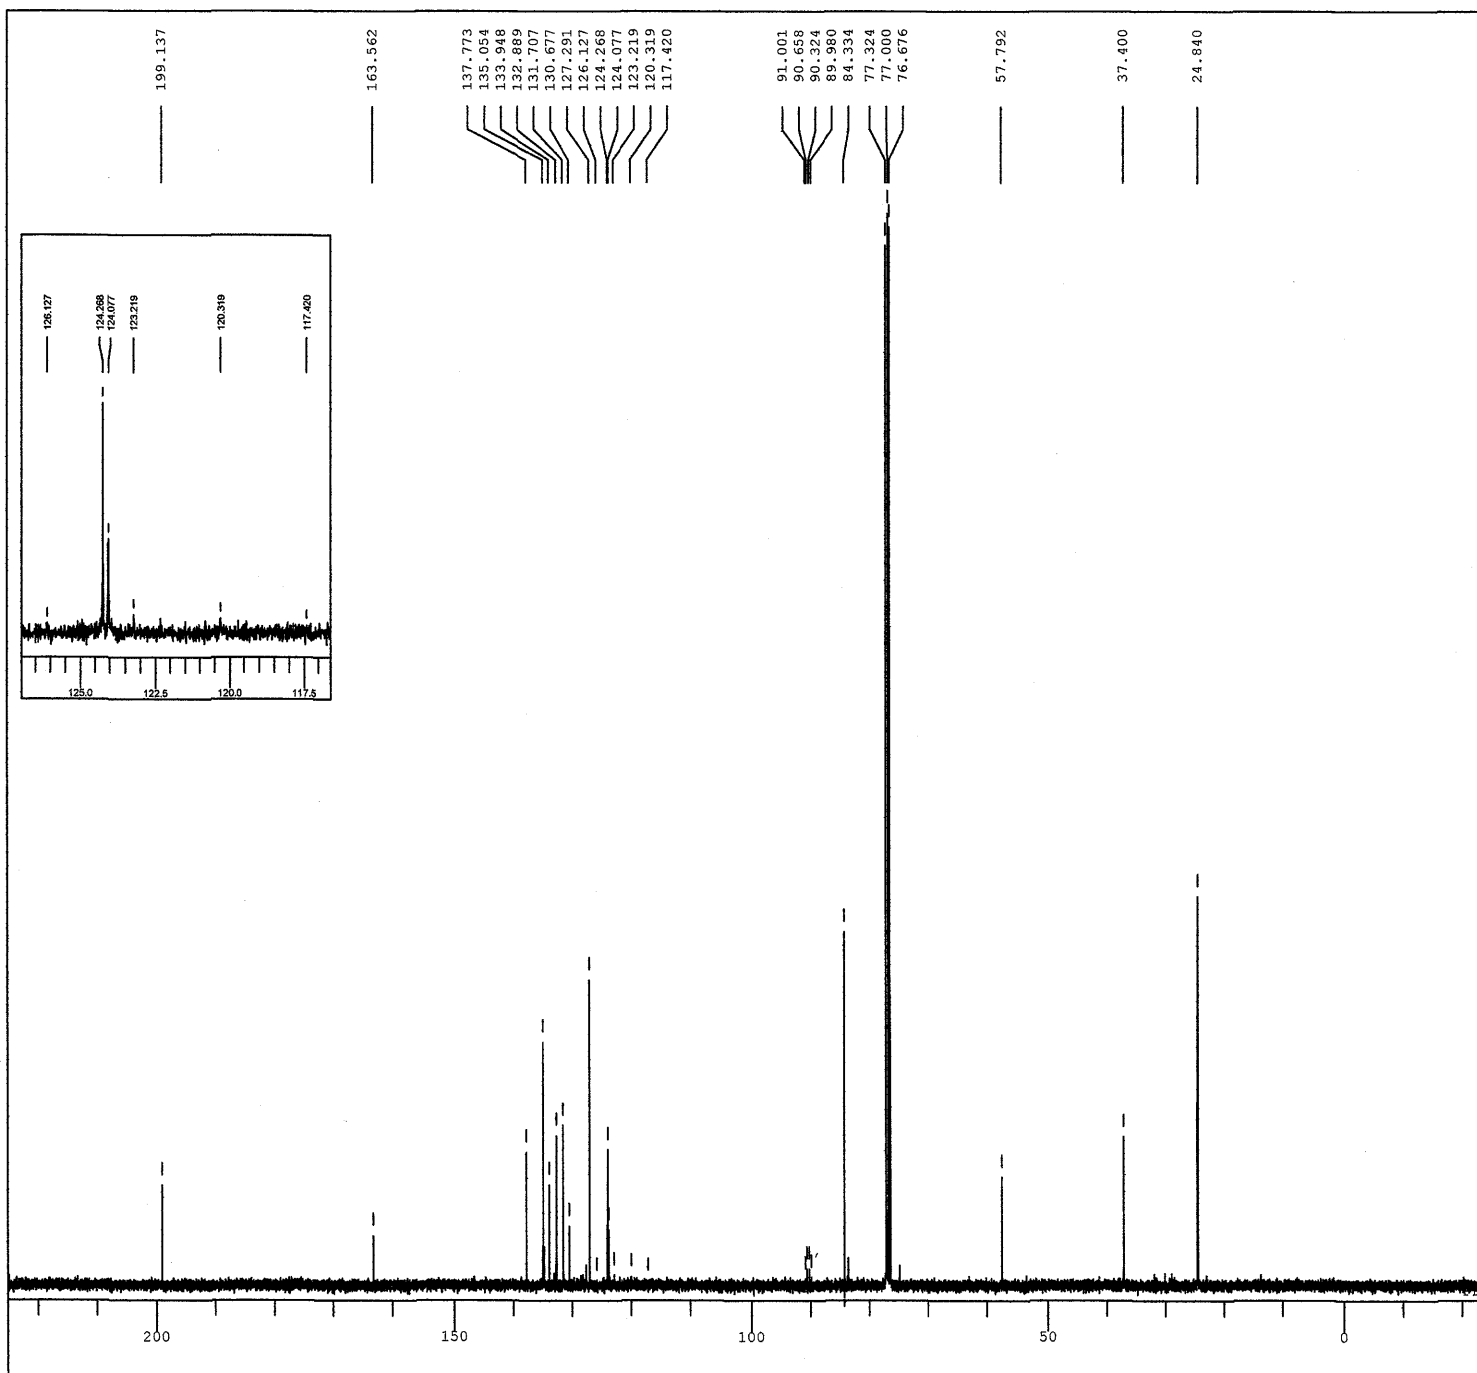

DFILE ozawa06-121\_13C.jdf  
 COMNT 4-Bpin-Ph, [0]  
 DATIM 06-01-2015 07:38:31  
 OBNUC 13C  
 EXMOD carbon.jxp  
 OBFREQ 98.52 MHz  
 OBSETE 4.64 KHz  
 OBFIN 8.74 Hz  
 POINT 32767  
 FREQU 30788.18 Hz  
 SCANS 2000  
 ACQTM 1.0643 sec  
 PD 2.0000 sec  
 PW1 3.07 usec  
 IRNUC 1H  
 CTEMP 21.9 c  
 SLVNT CDCL3  
 EXREF 77.00 ppm  
 BF 0.10 Hz  
 RGAIN 60

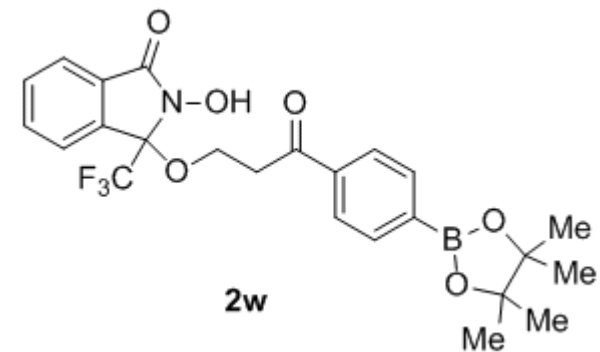

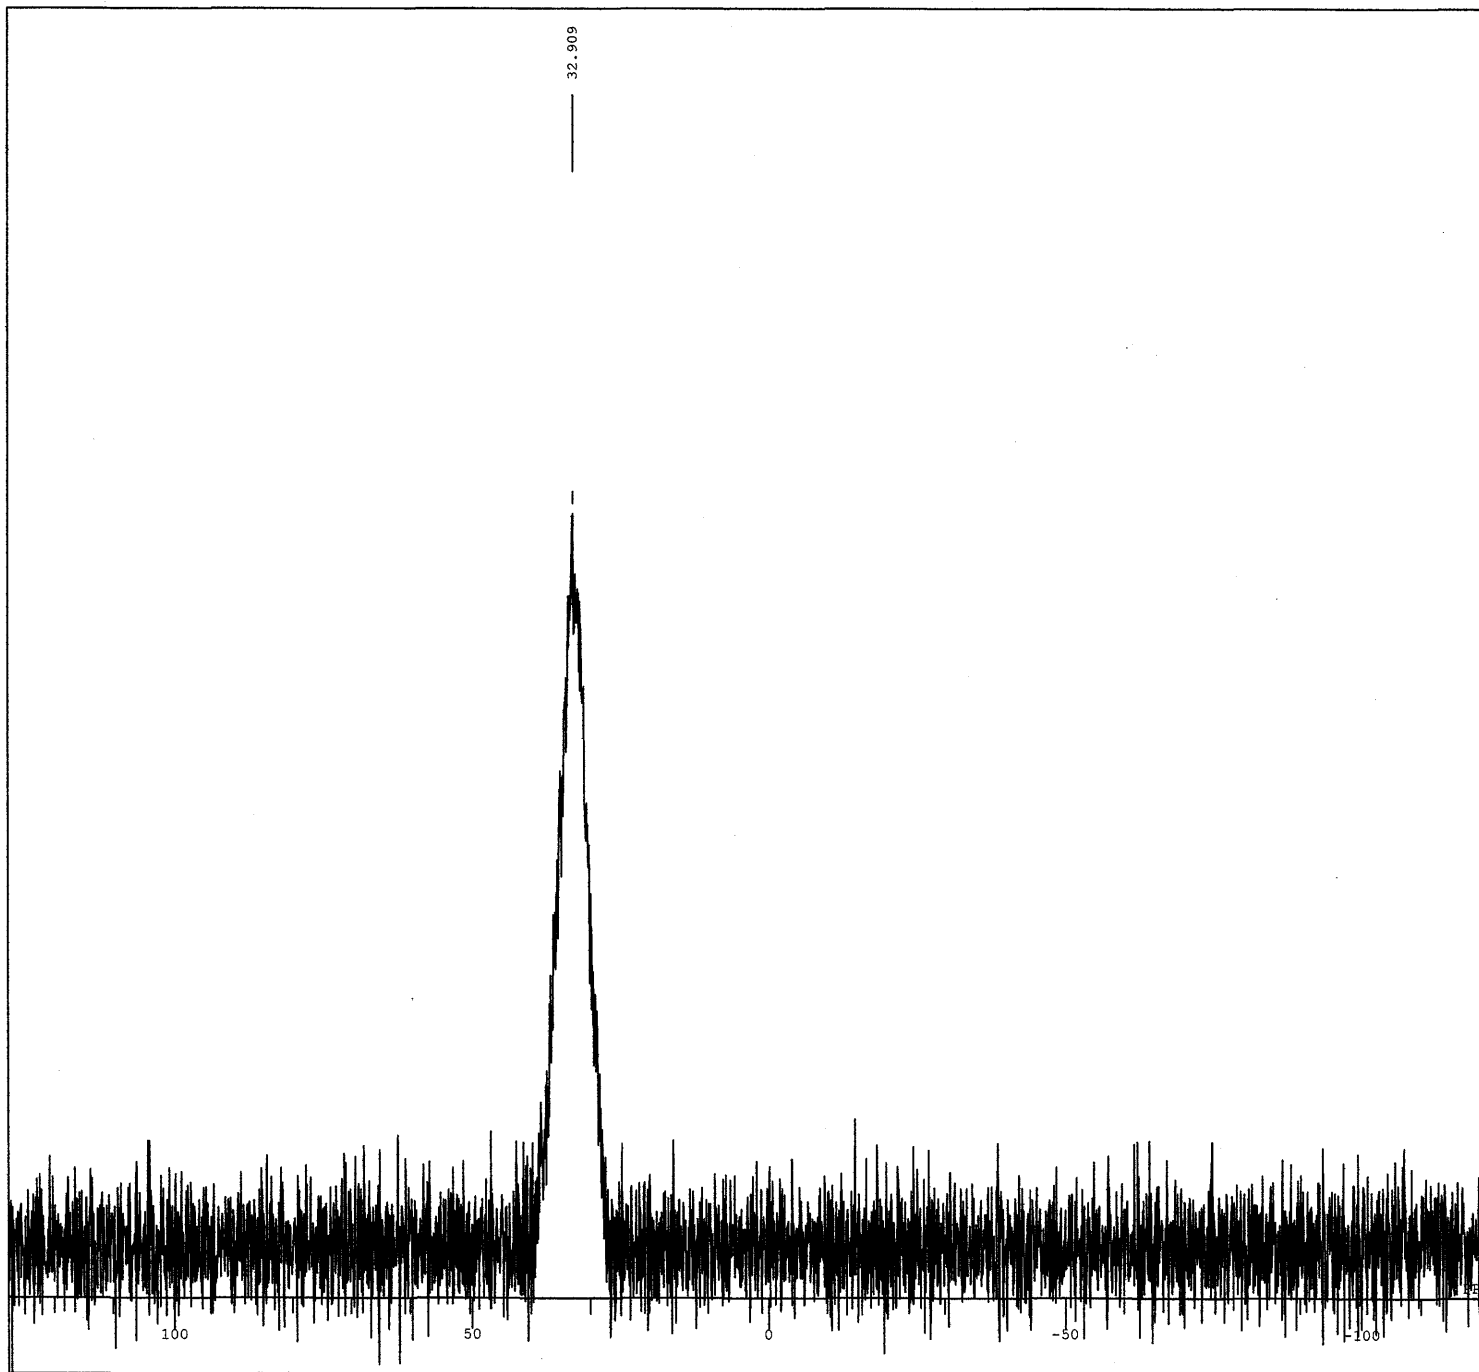

DFILE ozawa06-121 11B.jdf  
COMNT 4-Bpin-Ph, [0]  
DATIM 05-01-2015 12:30:28  
OBNUC 11B  
EXMOD carbon.jxp  
OBFRO 125.70 MHz  
OBSEF 0.81 KHz  
OBFIN 3.25 Hz  
POINT 4095  
FREQU 39308.18 Hz  
SCANS 500  
ACQTM 0.1042 sec  
PD 80.0000 sec  
PW1 3.98 usec  
IRNUC 1H  
CTEMP 21.7 c  
SLVNT CDCL3  
EXREF 31.00 ppm  
BF 0.12 Hz  
RGAIN 60

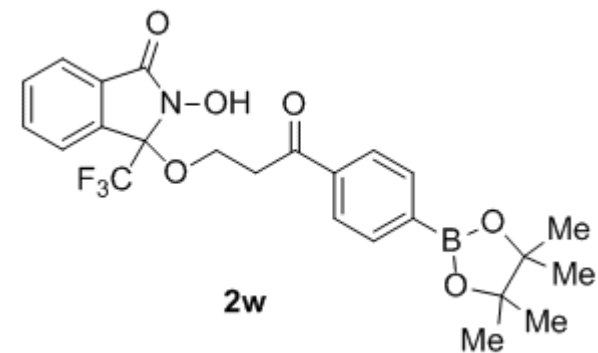



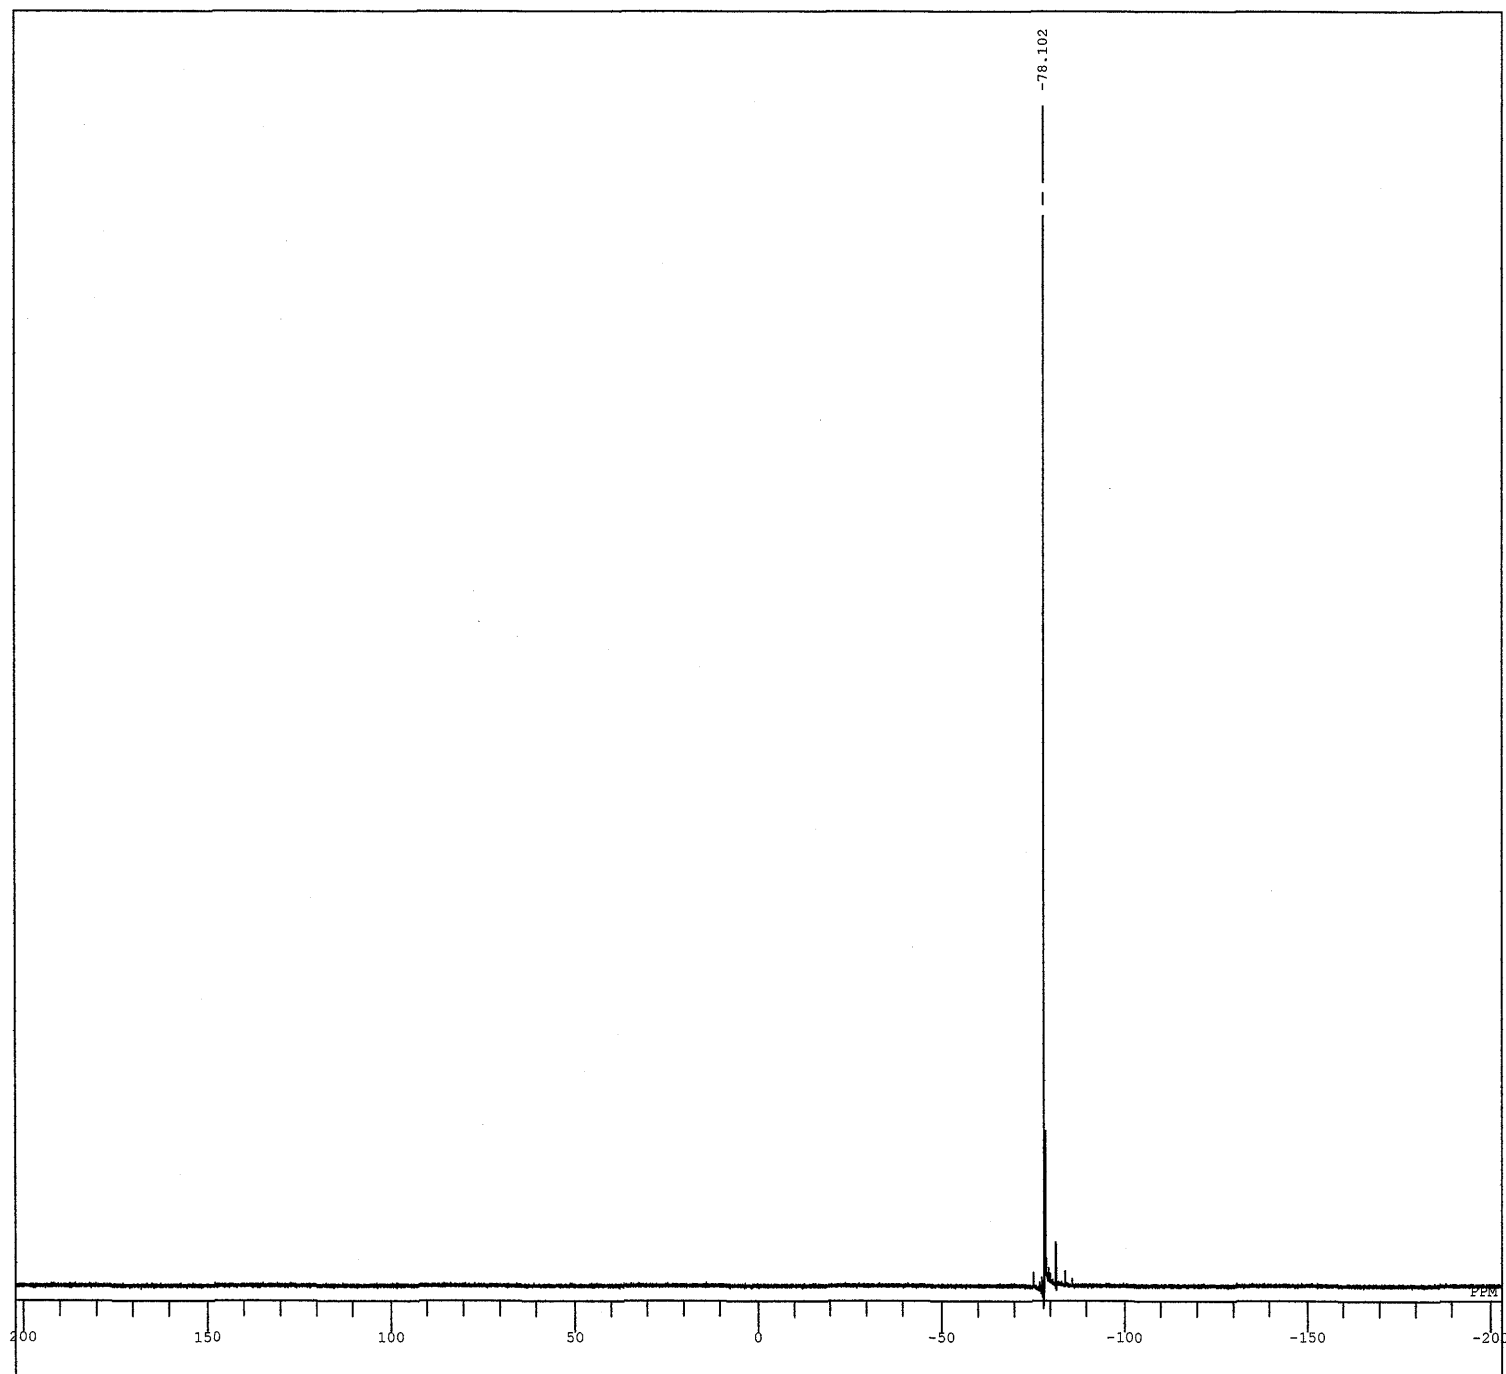

DFILE ozawa06-121\_19F.jdf  
COMNT 4-Bpin-Ph, [0]  
DATIM 05-01-2015 12:27:22  
OBNUC 19F  
EXMOD proton.jxp  
OBFRO 368.64 MHz  
OBSET 7.63 KHz  
OBFIN 2.85 Hz  
POINT 16384  
FREQU 186567.17 Hz  
SCANS 4  
ACQTM 0.0878 sec  
PD 5.0000 sec  
PW1 3.90 usec  
IRNUC 19F  
CTEMP 21.6 c  
SLVNT CDCL3  
EXREF -164.90 ppm  
BF 0.12 Hz  
RGAIN 50

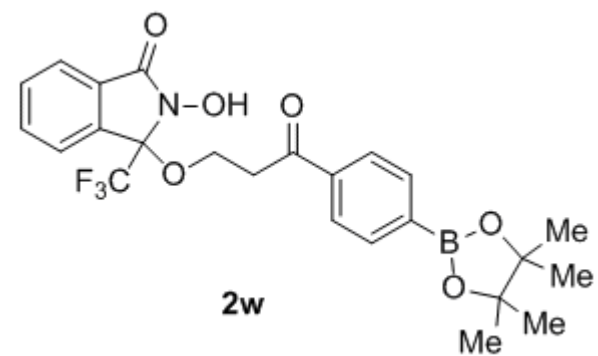

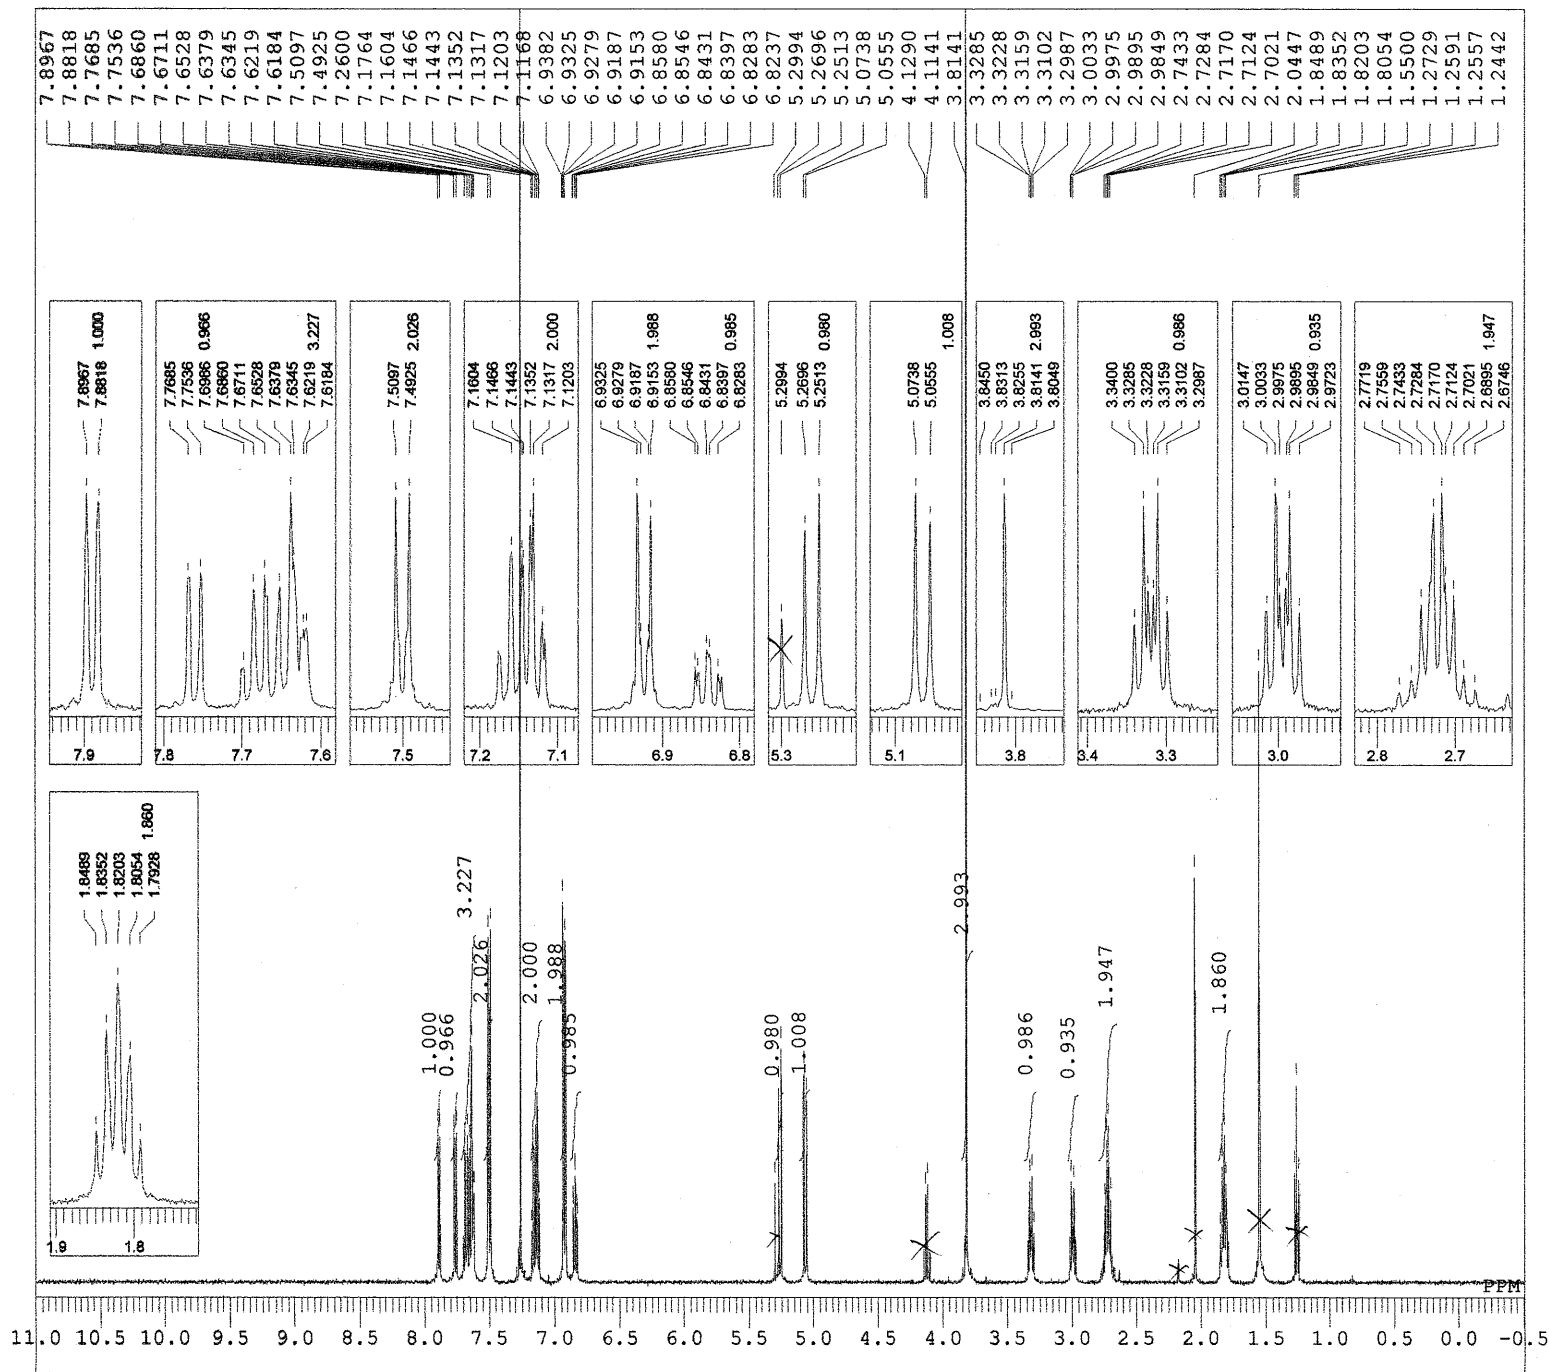

DFILE ozawa06-144.als  
 COMNT 2-I-Ph  
 DATIM 2015-01-22 12:59:51  
 OBNUC 1H  
 EXMOD proton.jxp  
 OBFREQ 500.16 MHz  
 OBSET 2.41 KHz  
 OBFIN 6.01 Hz  
 POINT 13107  
 FREQU 7507.51 Hz  
 SCANS 4  
 ACQTM 1.7459 sec  
 PD 5.0000 sec  
 PW1 5.55 usec  
 IRNUC 1H  
 CTEMP 23.2 c  
 SLVNT CDCL3  
 EXREF 7.26 ppm  
 BF 0.12 Hz  
 RGAIN 42

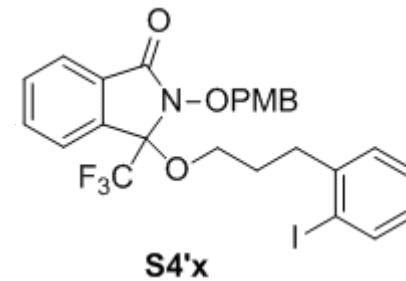

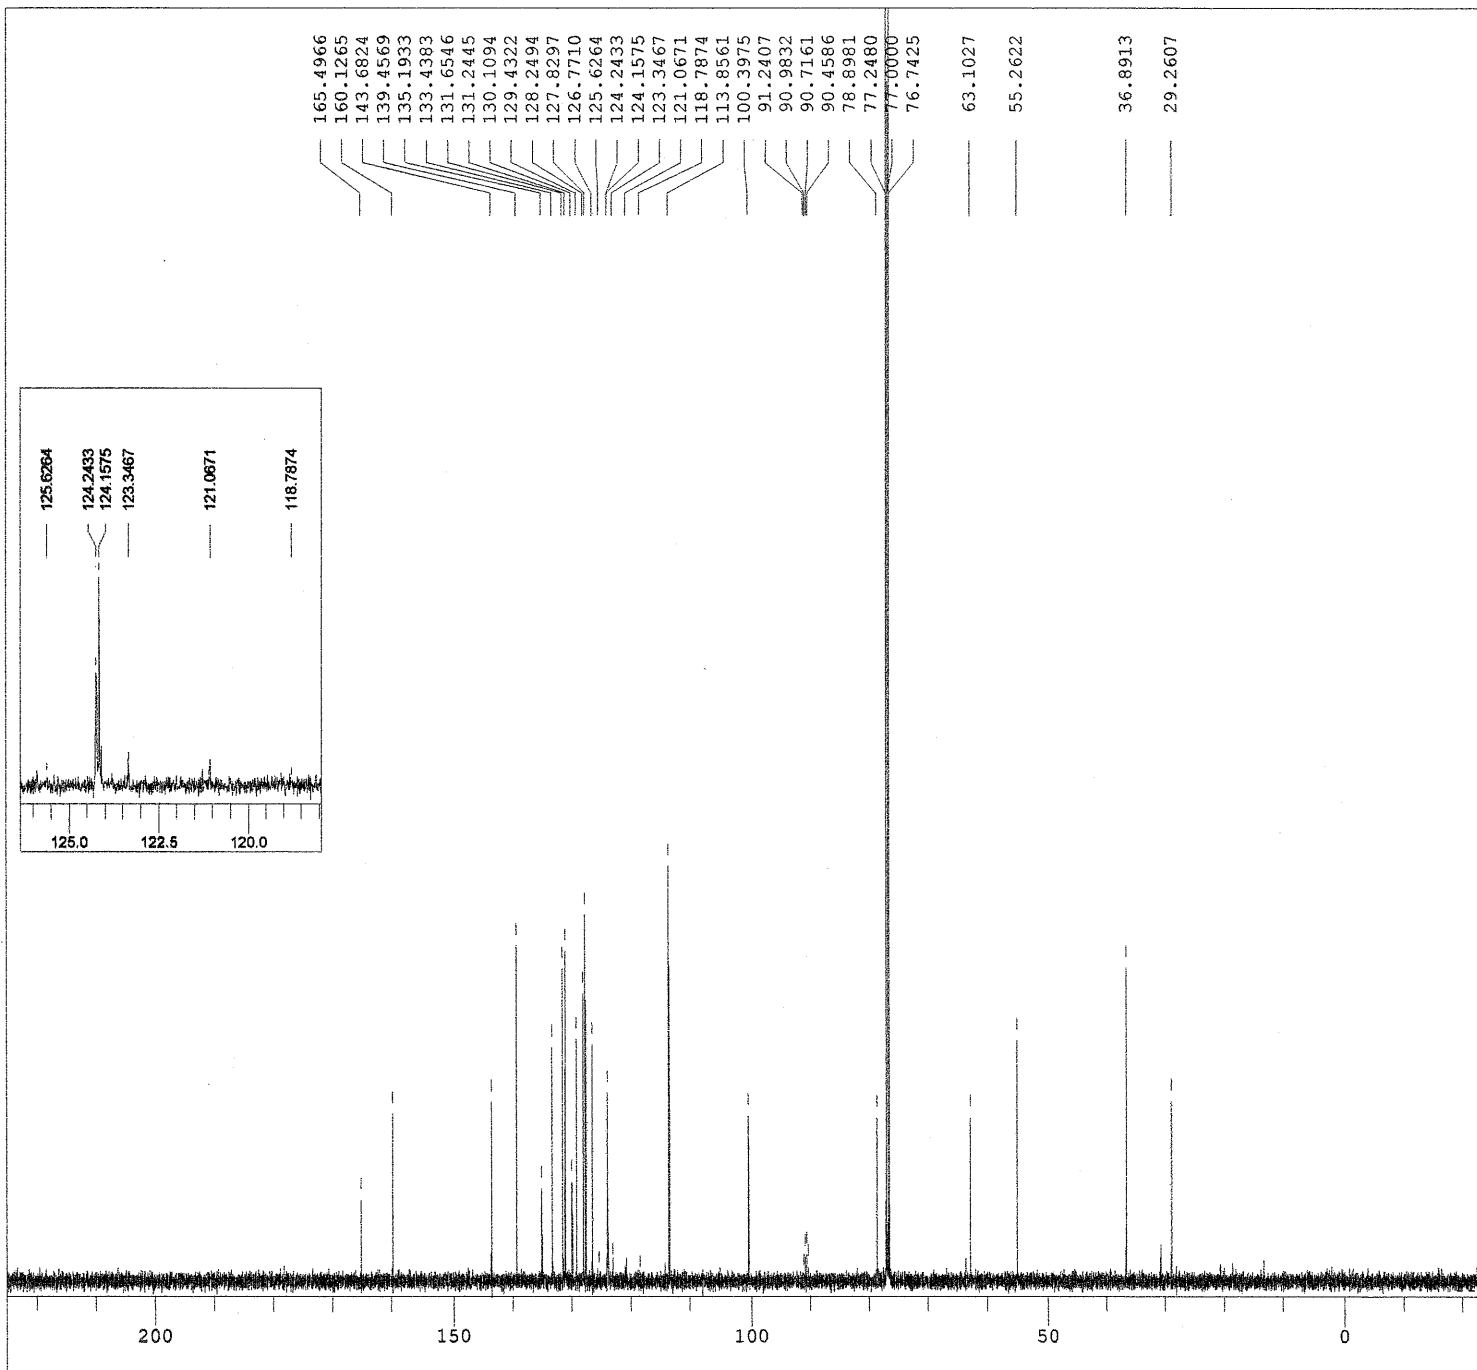

DFILE ozawa06-144 13C.jdf  
 COMNT PTLC, 2-I-Ph, PMB  
 DATIM 2015-01-26 13:52:31  
 OBNUC 13C  
 EXMOD carbon.jxp  
 OBFREQ 125.77 MHz  
 OBSSET 7.87 KHz  
 OBFIN 4.21 Hz  
 POINT 32767  
 FREQU 39308.18 Hz  
 SCANS 1000  
 ACQTM 0.8336 sec  
 PD 2.0000 sec  
 PW1 3.40 usec  
 IRNUC 1H  
 CTEMP 23.6 c  
 SLVNT CDCL3  
 EXREF 77.00 ppm  
 BF 0.12 Hz  
 RGAIN 60

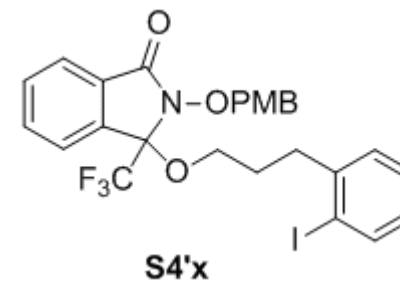

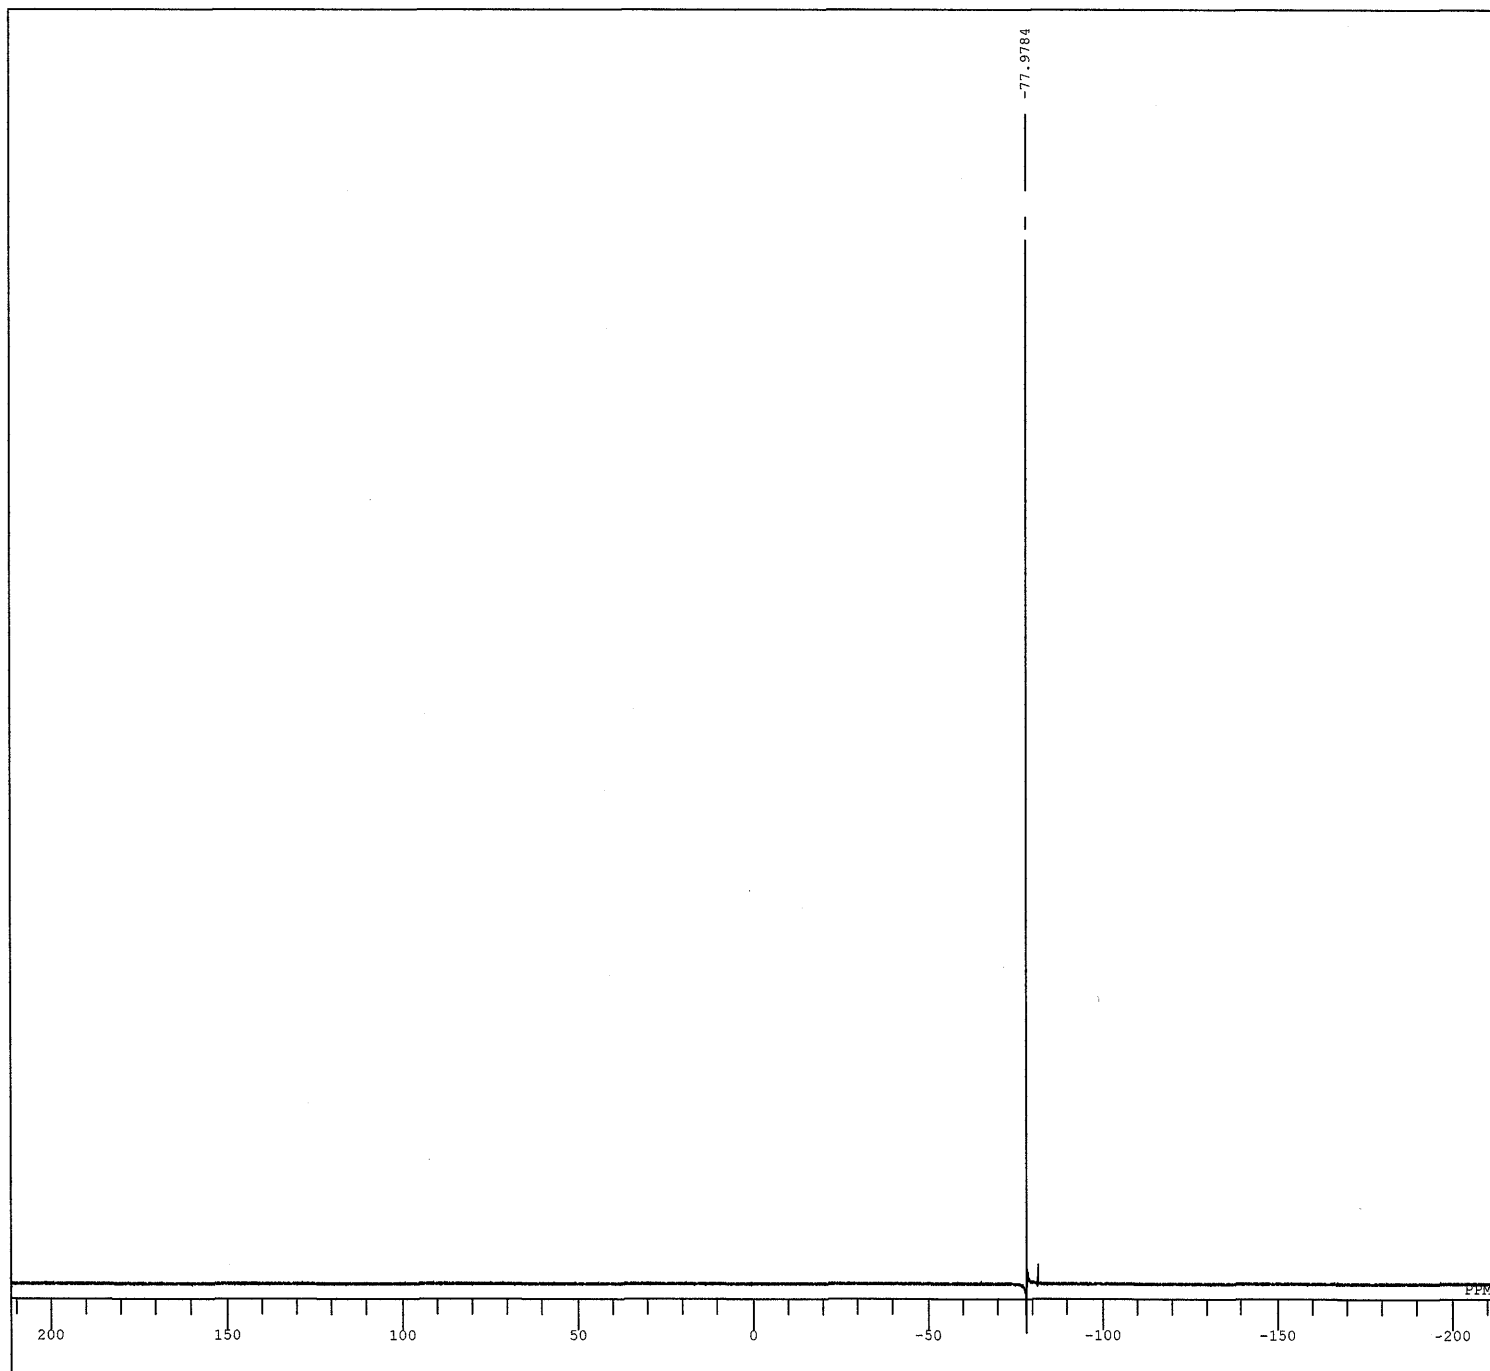

DFILE ozawa06-144 19F.jdf  
COMNT 2-I-Ph, PMB  
DATIM 21-03-2015 12:18:53  
OBNUC 19F  
EXMOD proton.jxp  
OBFREQ 368.64 MHz  
OBSEF 7.63 KHz  
OBFIN 2.85 Hz  
POINT 16384  
FREQU 195312.50 Hz  
SCANS 4  
ACQTM 0.0839 sec  
PD 5.0000 sec  
PW1 3.90 usec  
IRNUC 19F  
CTEMP 25.1 c  
SLVNT CDCL3  
EXREF -164.90 ppm  
BF 0.12 Hz  
RGAIN 50

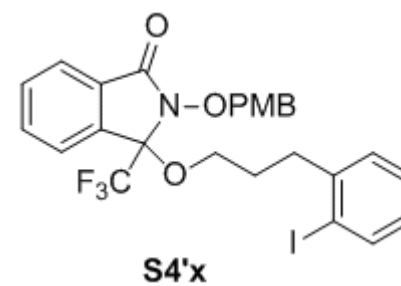

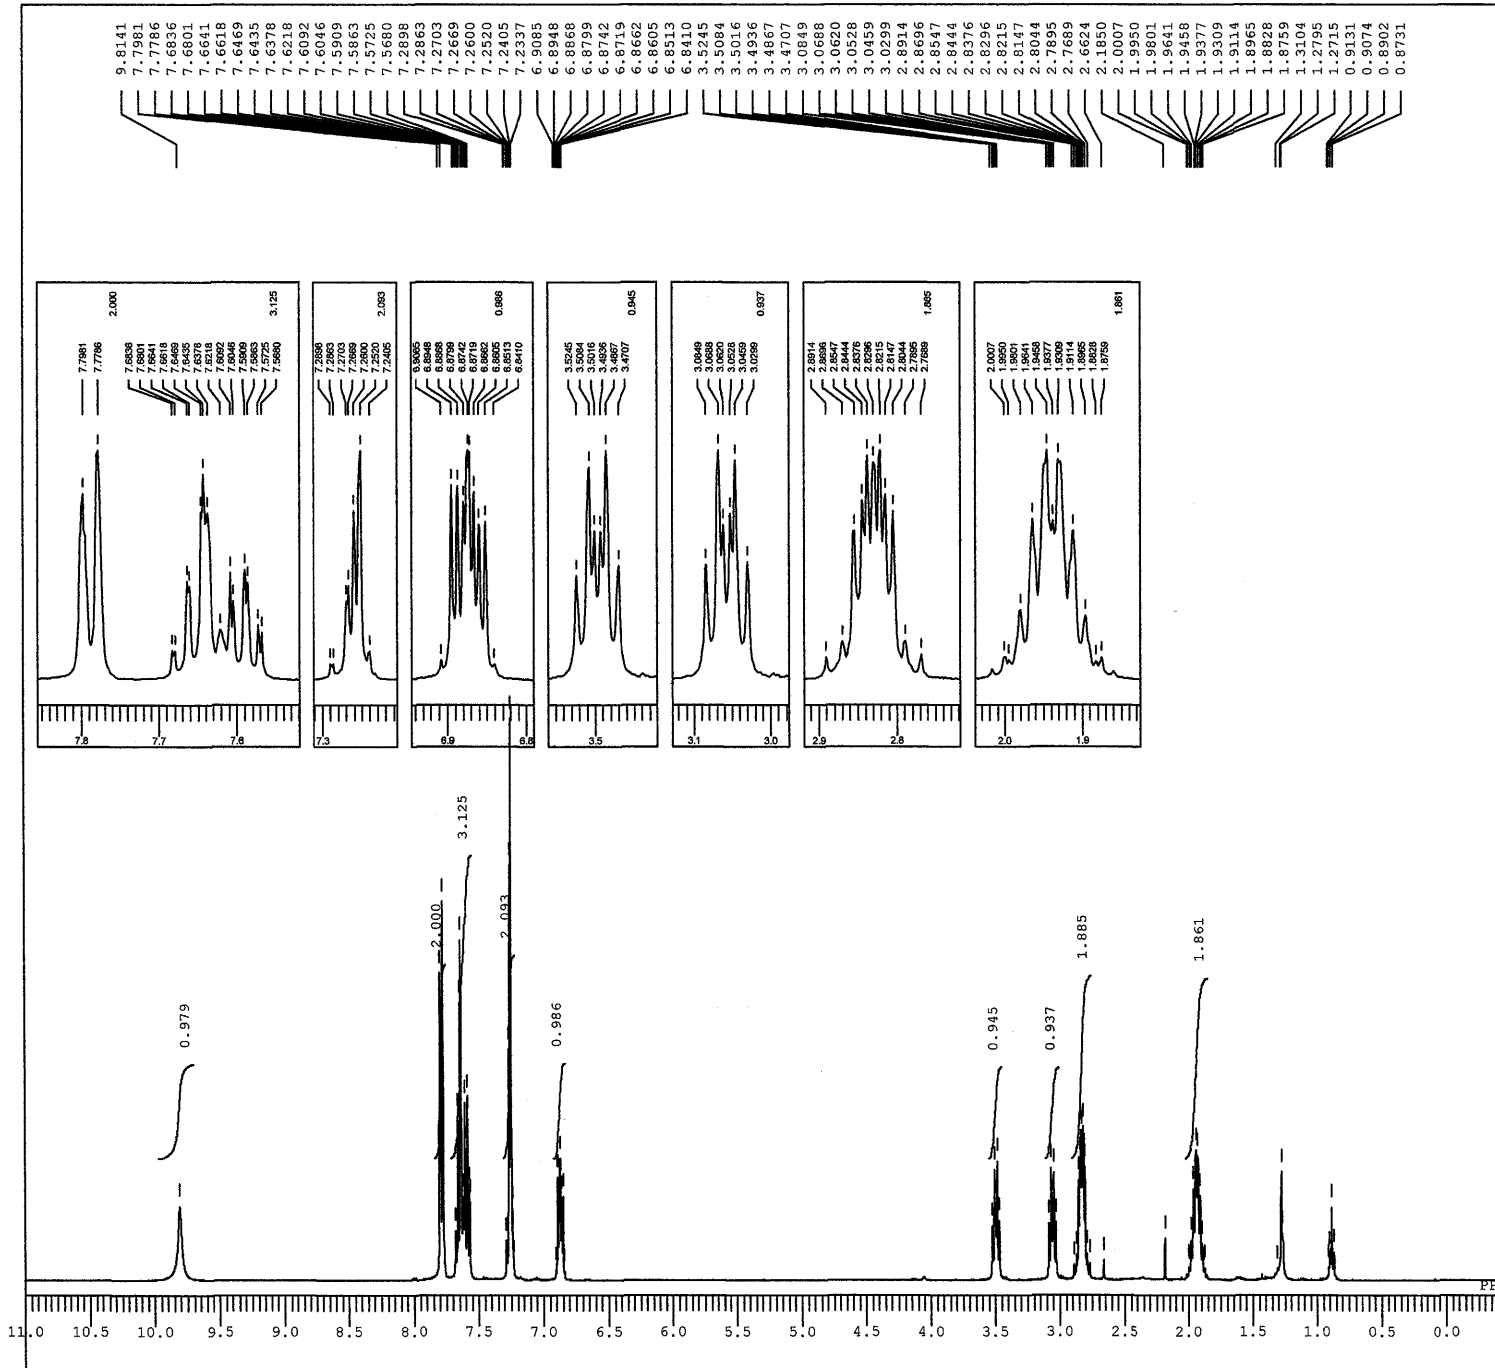

```

DFILE ozawa06-157_1h.jdf
COMNT 2-I-Ph, OH
DATIM 14-03-2015 08:29:06
OBNUC 1H
EXMOD proton.jxp
OBFRQ 391.78 MHz
OBSET 8.51 KHz
OBFIN 3.34 Hz
POINT 16384
FREQU 7348.62 Hz
SCANS 4
ACQTM 2.2295 sec
PD 5.0000 sec
PW1 4.99 usec
IRNUC 1H
CTEMP 24.4 c
SLVNT CDCL3
EXREF 7.26 ppm
BF 0.12 Hz
RGAIN 30
    
```

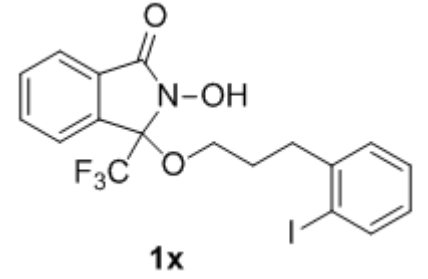

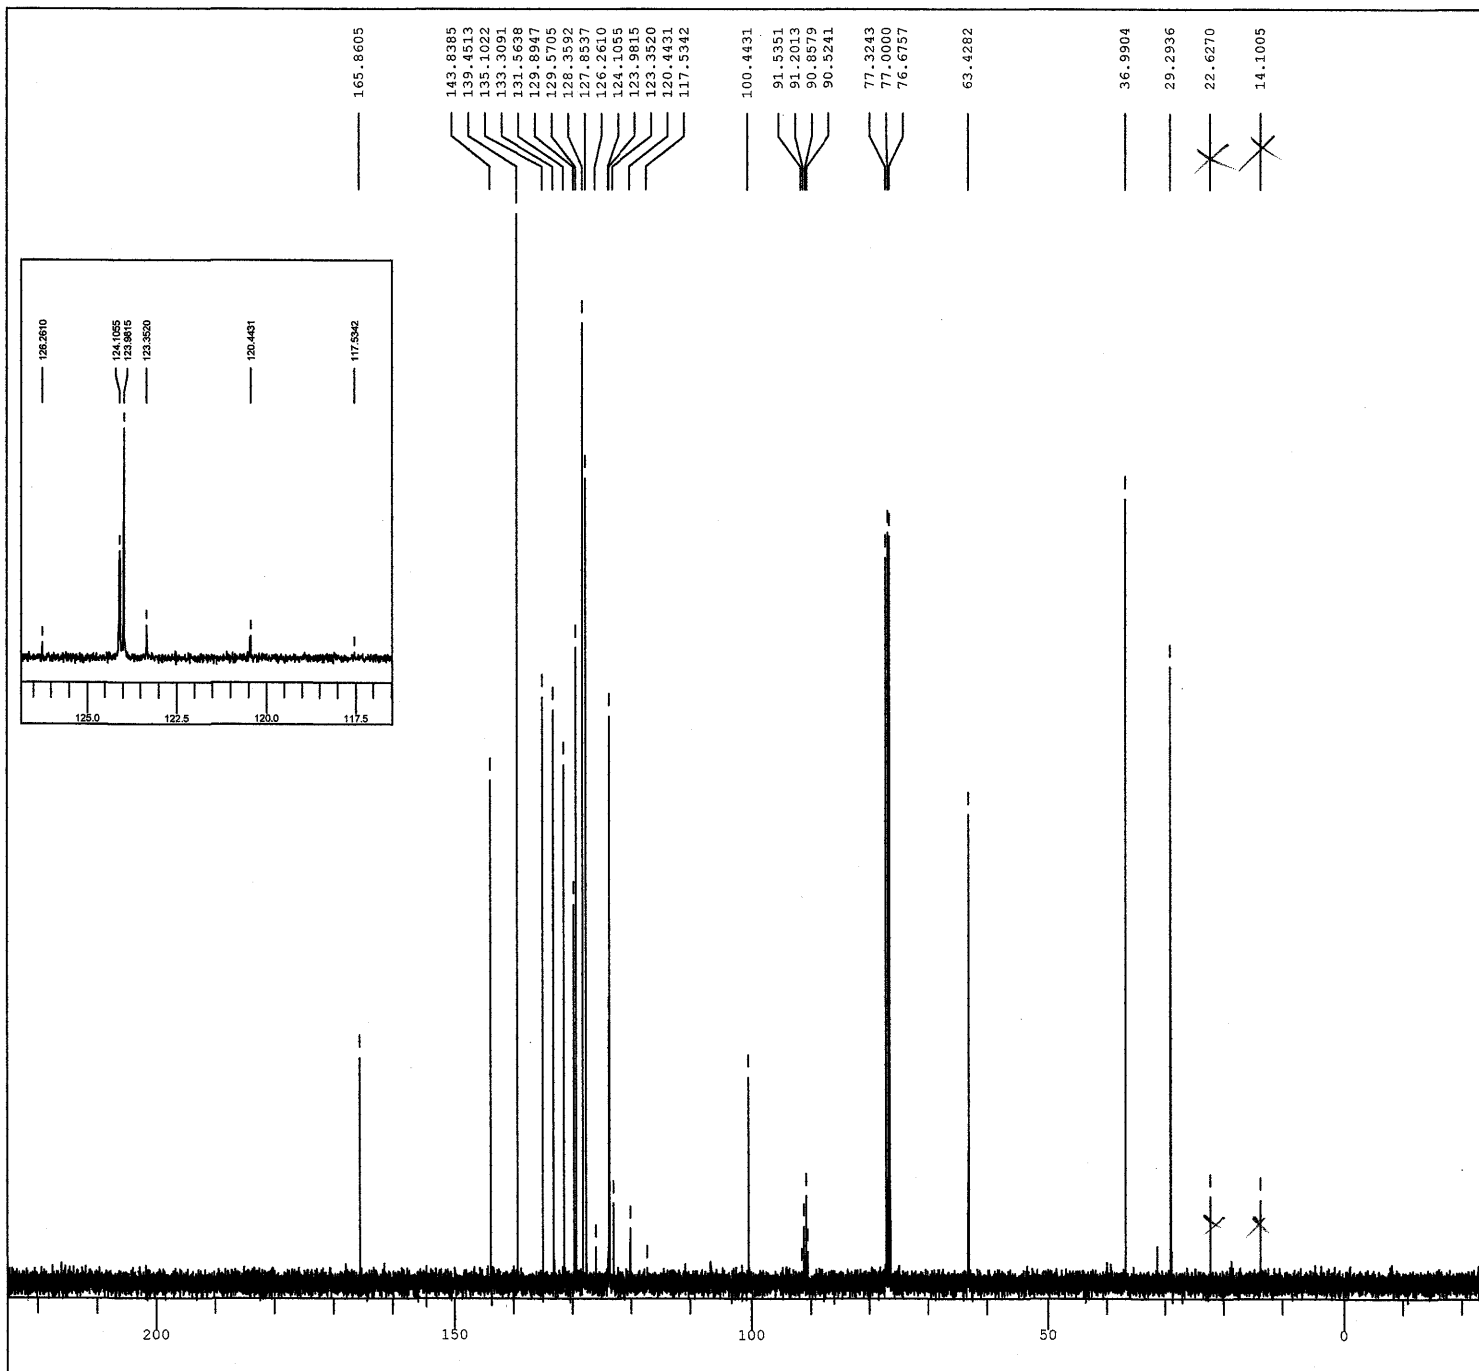

DFILE ozawa06-157\_13C.jdf  
 COMNT 2-I-Ph, OH  
 DATIM 14-03-2015 08:31:37  
 OBNUC 13C  
 EXMOD carbon.jxp  
 OBFREQ 98.52 MHz  
 OBSETE 4.64 KHz  
 OBFIN 8.74 Hz  
 POINT 32767  
 FREQU 30788.18 Hz  
 SCANS 348  
 ACQTM 1.0643 sec  
 PD 2.0000 sec  
 PW1 3.16 usec  
 IRNUC 1H  
 CTEMP 24.6 c  
 SLVNT CDCL3  
 EKREF 77.00 ppm  
 BF 0.12 Hz  
 RGAIN 60

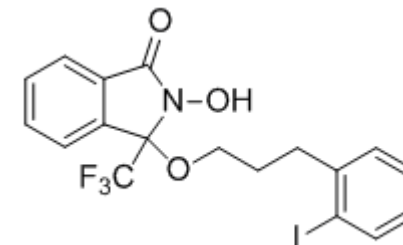

1x

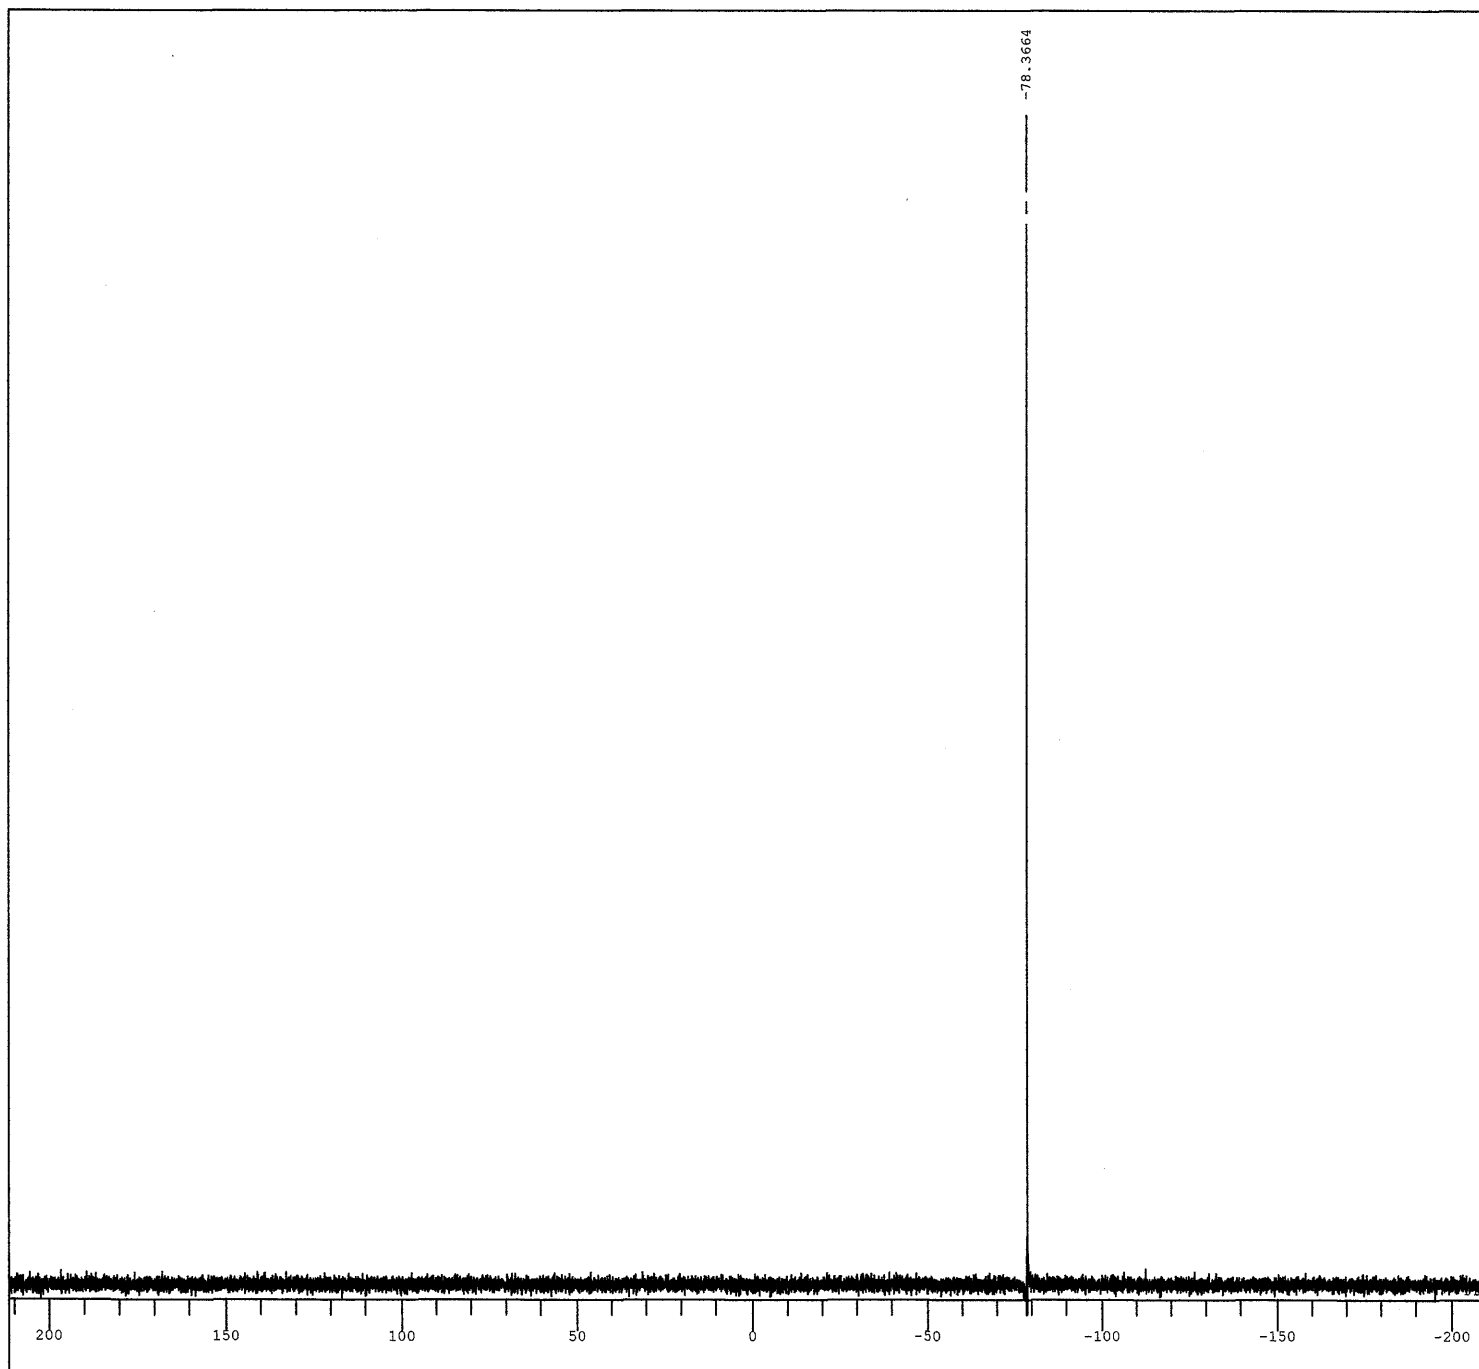

DFILE ozawa06-157\_19F.jdf  
COMNT 2-I-Ph, OH  
DATIM 21-03-2015 11:38:46  
OBNUC 19F  
EXMOD proton.jxp  
OBFREQ 368.64 MHz  
OBSSET 7.63 KHz  
OBFIN 2.85 Hz  
POINT 16384  
FREQU 195312.50 Hz  
SCANS 4  
ACQTM 0.0839 sec  
PD 5.0000 sec  
PW1 3.90 usec  
IRNUC 19F  
CTEMP 25.1 c  
SLVNT CDCL3  
EXREF -164.90 ppm  
BF 0.12 Hz  
RGAIN 50

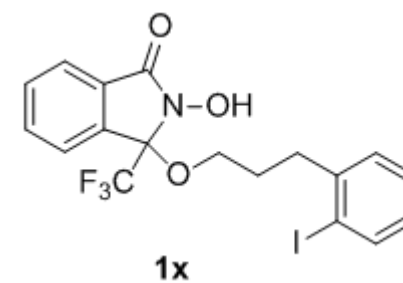

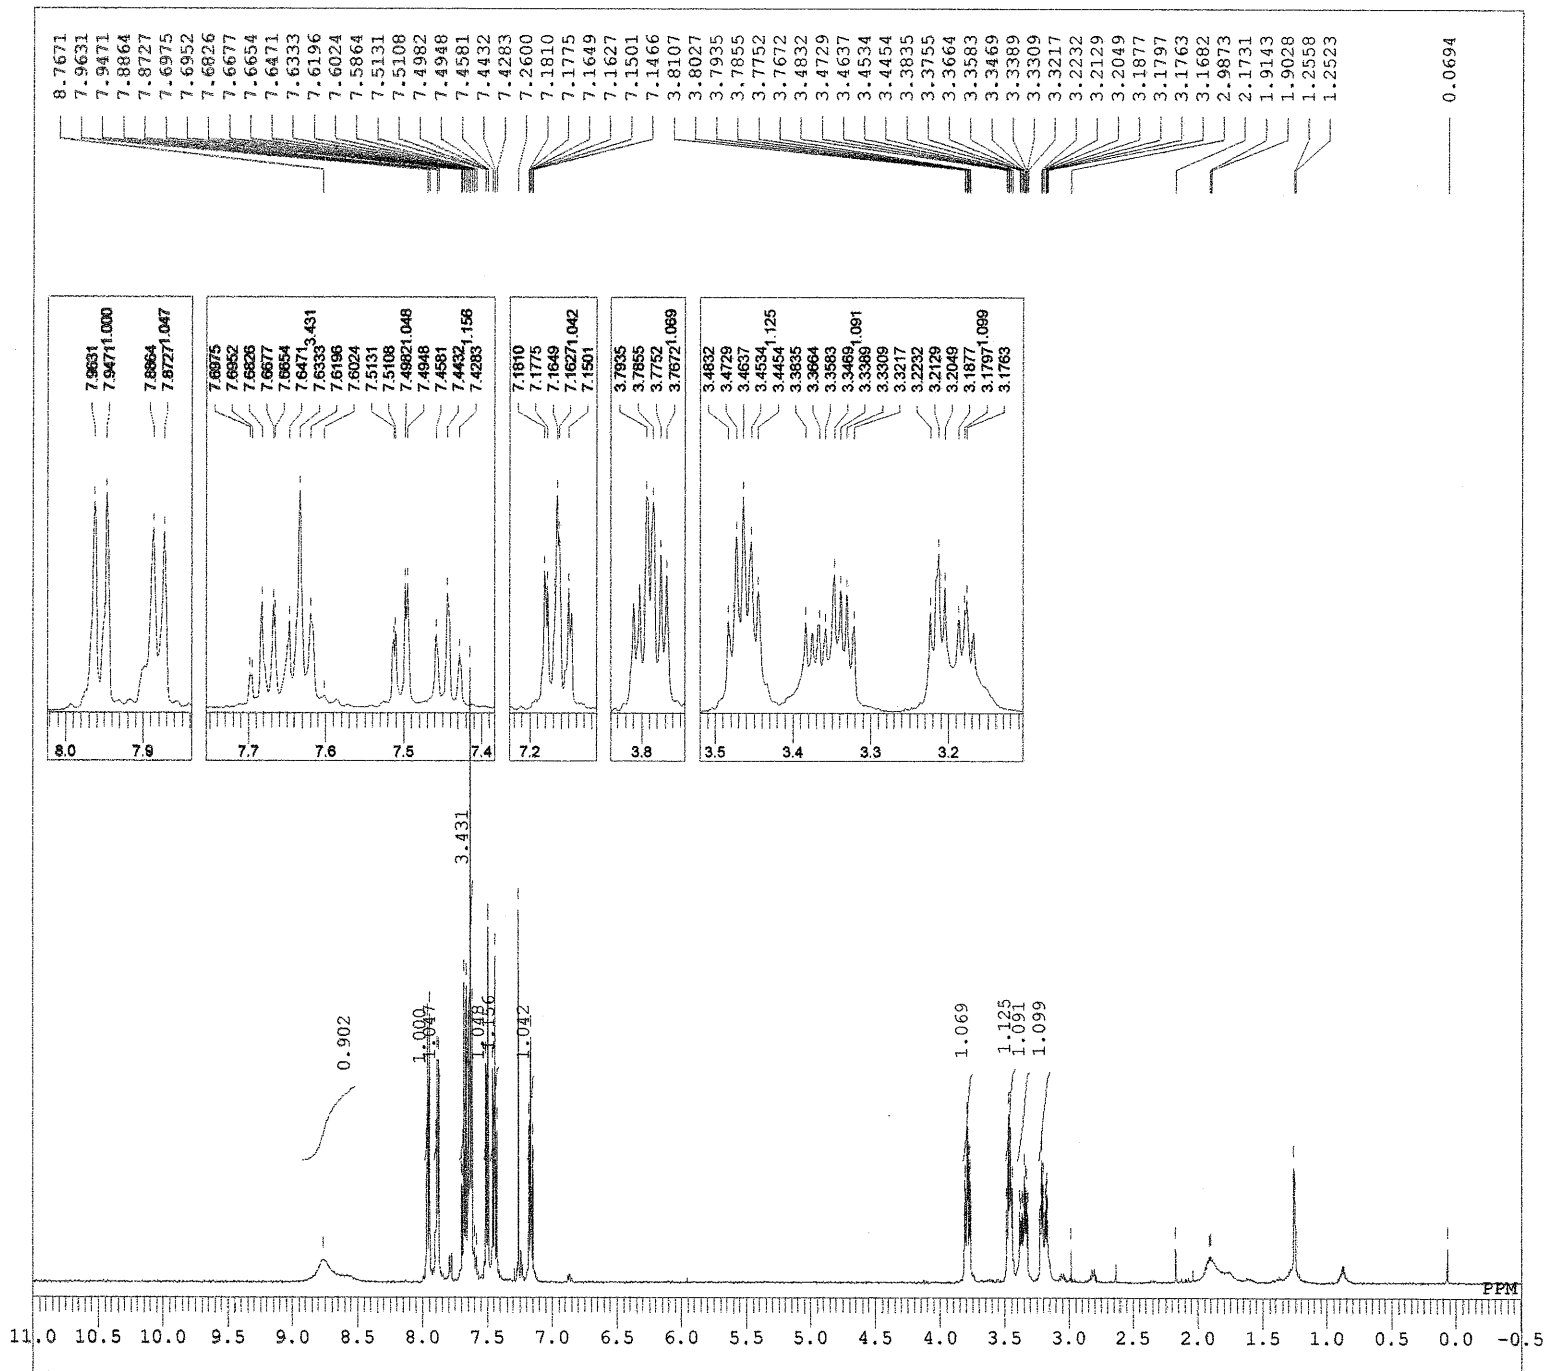

DFILE ozawa06-161\_1h.jdf  
 COMNT 2-I-Ph, [O]  
 DATIM 2015-03-14 07:18:52  
 OBNUC 1H  
 EXMOD proton.jxp  
 OBFREQ 500.16 MHz  
 OBSSET 2.41 KHz  
 OBFIN 6.01 Hz  
 POINT 16384  
 FREQU 9384.38 Hz  
 SCANS 4  
 ACQTM 1.7459 sec  
 PD 5.0000 sec  
 PW1 5.55 usec  
 IRNUC 1H  
 CTEMP 24.8 c  
 SLVNT CDCL3  
 EXREF 7.26 ppm  
 BF 0.12 Hz  
 RGAIN 30

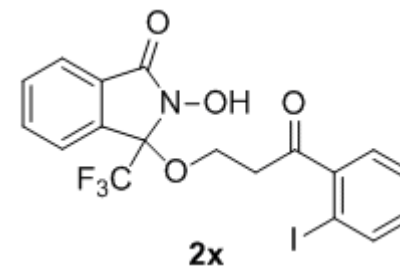



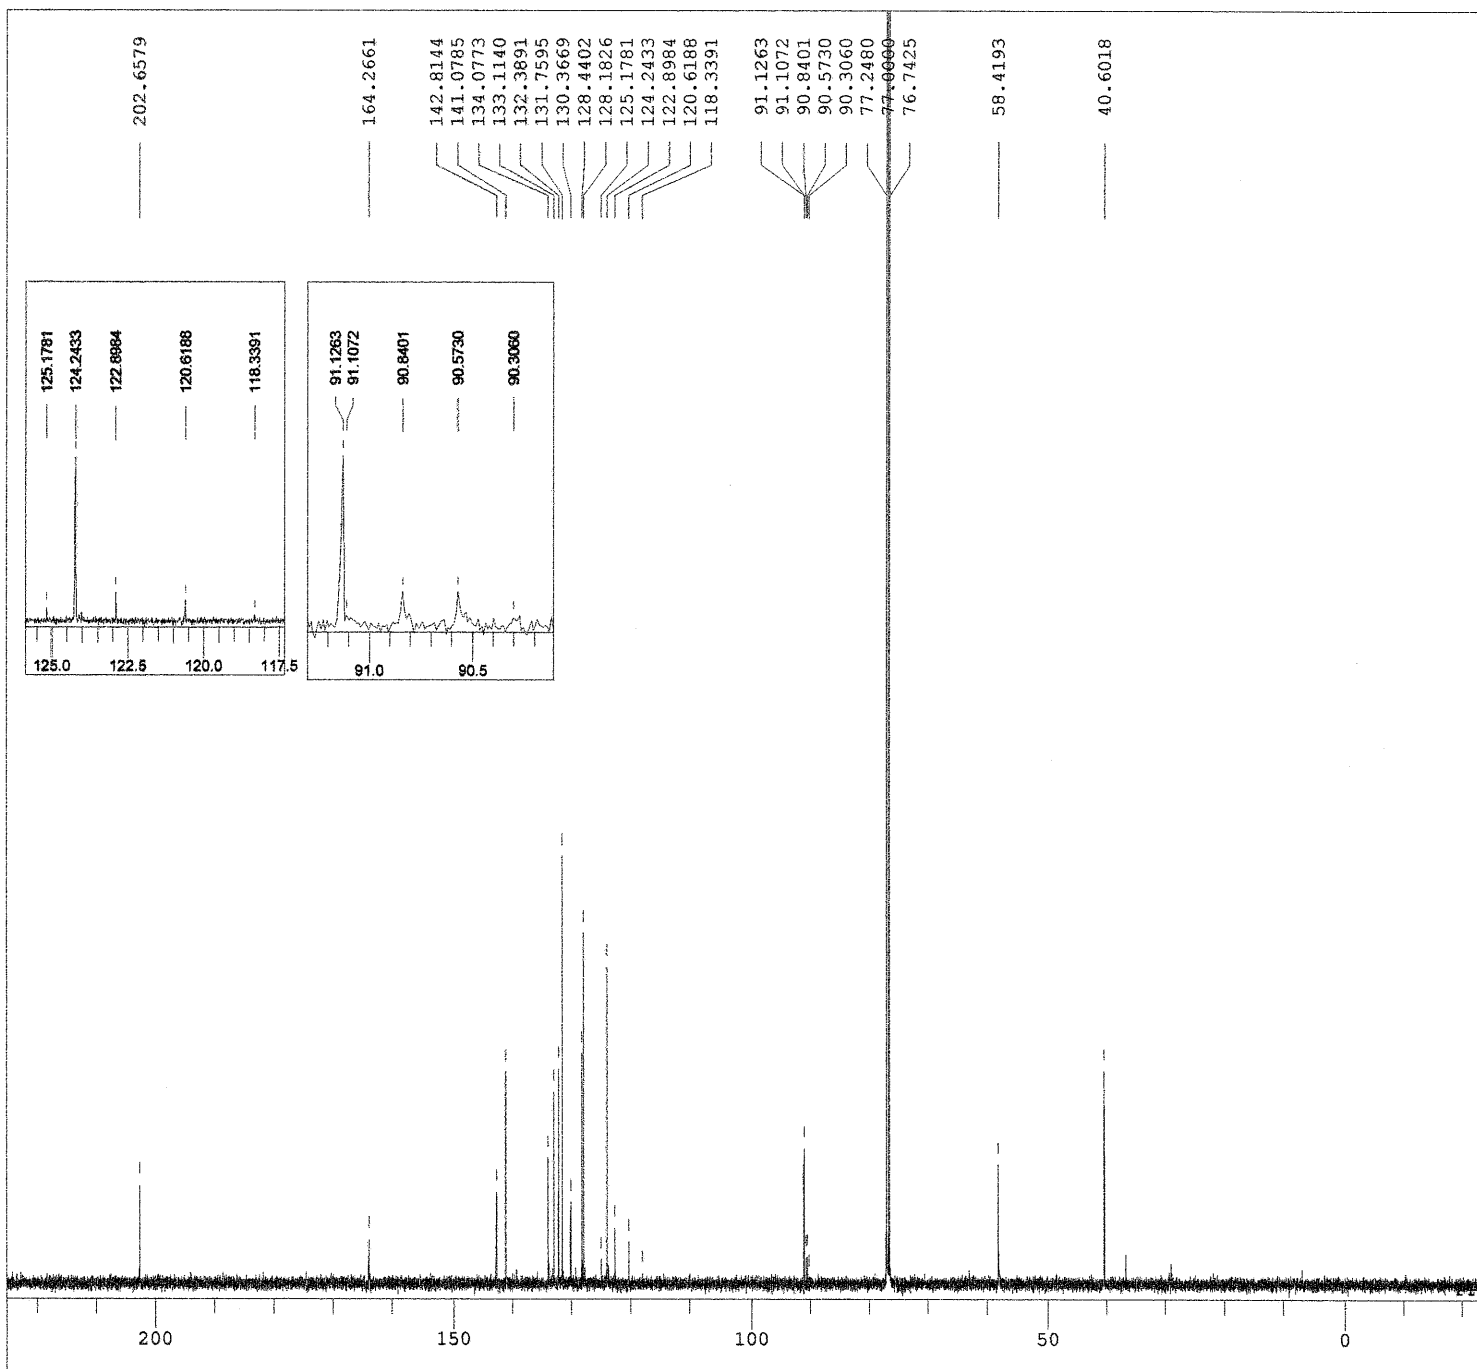

```

DFILE ozawa06-161_13C.jdf
COMMT 2-I-Ph, [O]
DATIM 2015-03-14 07:19:55
OBNUC 13C
EXMOD carbon.jxp
OBFREQ 125.77 MHz
OBSET 7.87 KHz
OBFIN 4.21 Hz
POINT 32767
FREQU 39308.18 Hz
SCANS 2472
ACQTM 0.8336 sec
PD 2.0000 sec
PW1 3.40 usec
IRNUC 1H
CTEMP 25.7 c
SLVNT CDCL3
EXREF 77.00 ppm
BF 0.12 Hz
RGAIN 60

```

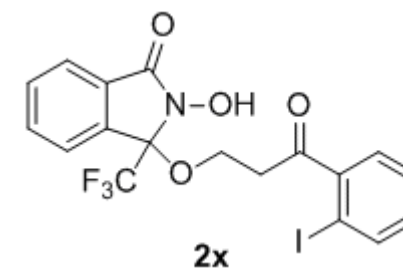

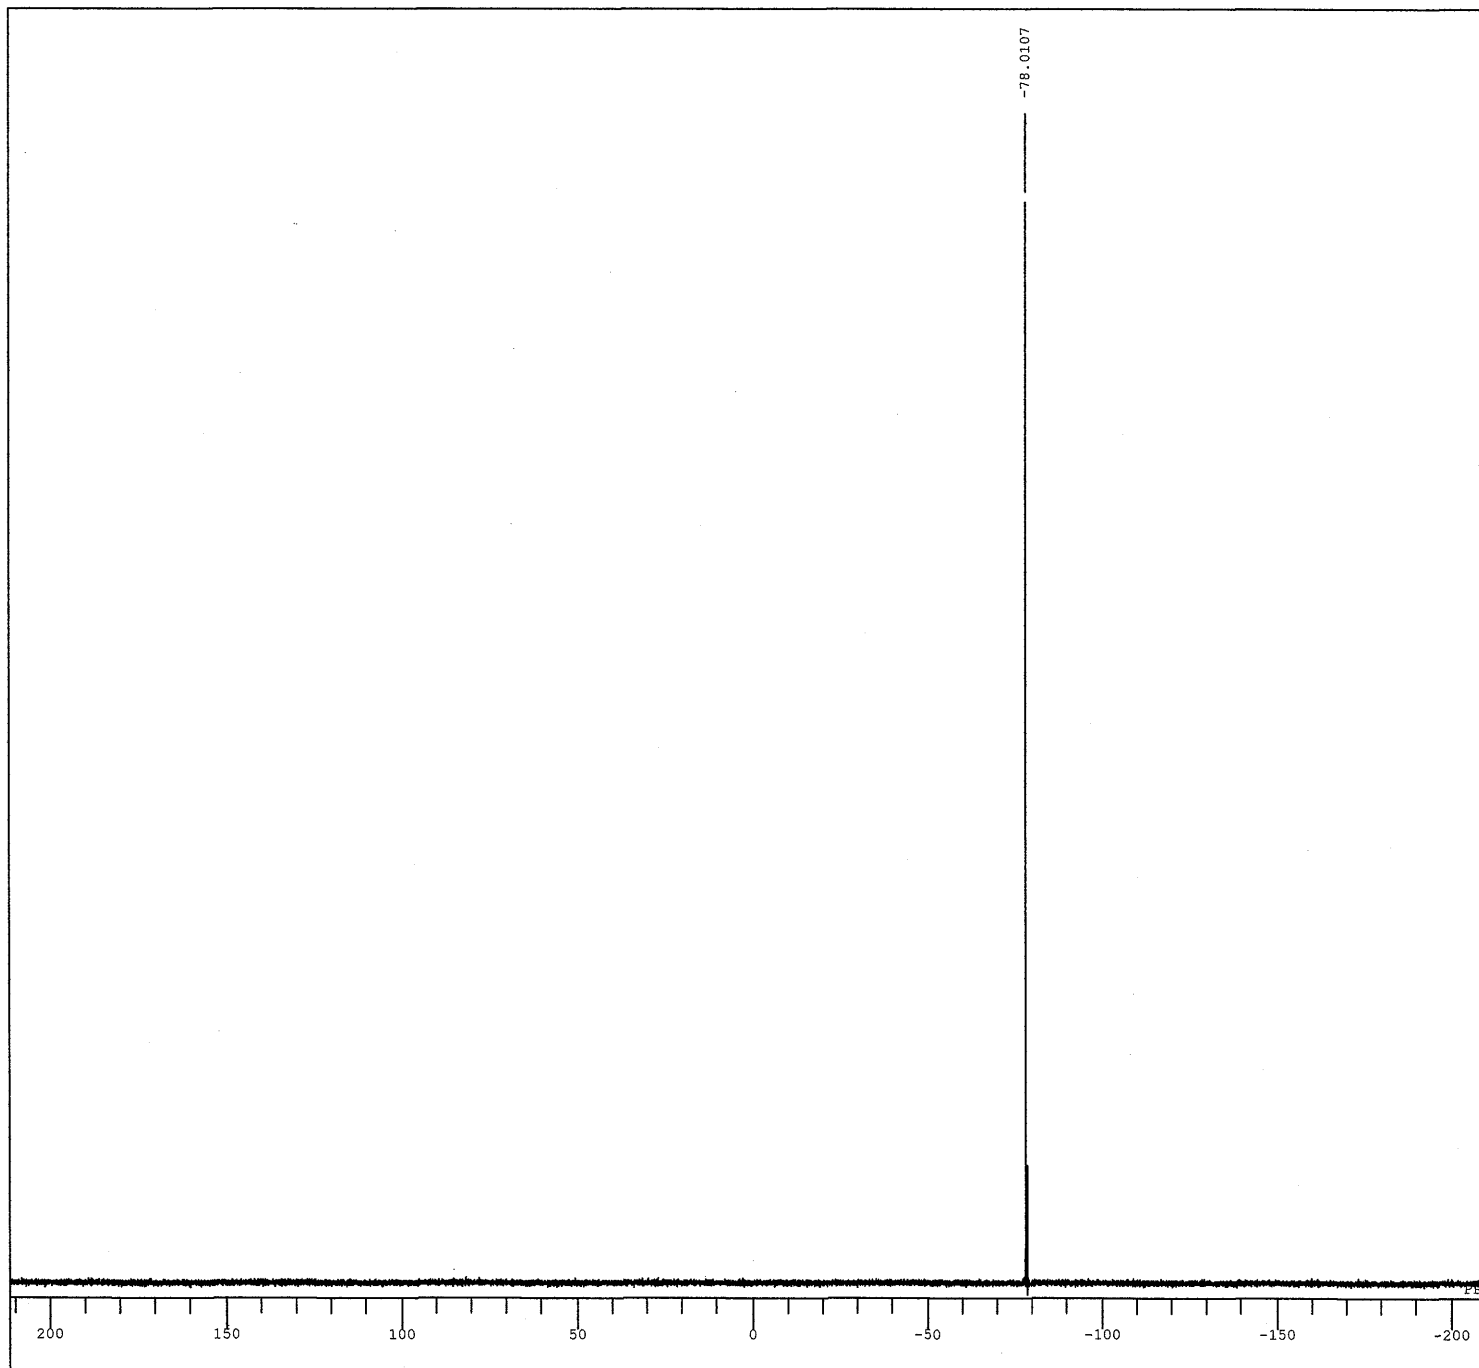

DFILE ozawa06-161\_1\_19F.jdf  
COMNT 2-I-Ph, [0]  
DATIM 21-03-2015 11:36:27  
OBNUC 19F  
EXMOD proton.jxp  
OBFRQ 368.64 MHz  
OBSET 7.63 KHz  
OBFIN 2.85 Hz  
POINT 16384  
FREQU 195312.50 Hz  
SCANS 4  
ACQTM 0.0839 sec  
PD 5.0000 sec  
PW1 3.90 usec  
IRNUC 19F  
CTEMP 25.1 c  
SLVNT CDCL3  
EXREF -164.90 ppm  
BF 0.12 Hz  
RGAIN 50

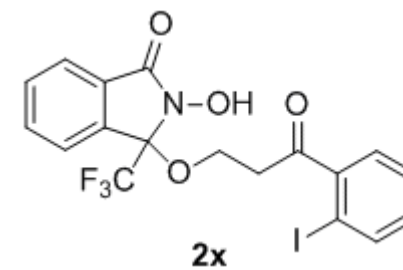

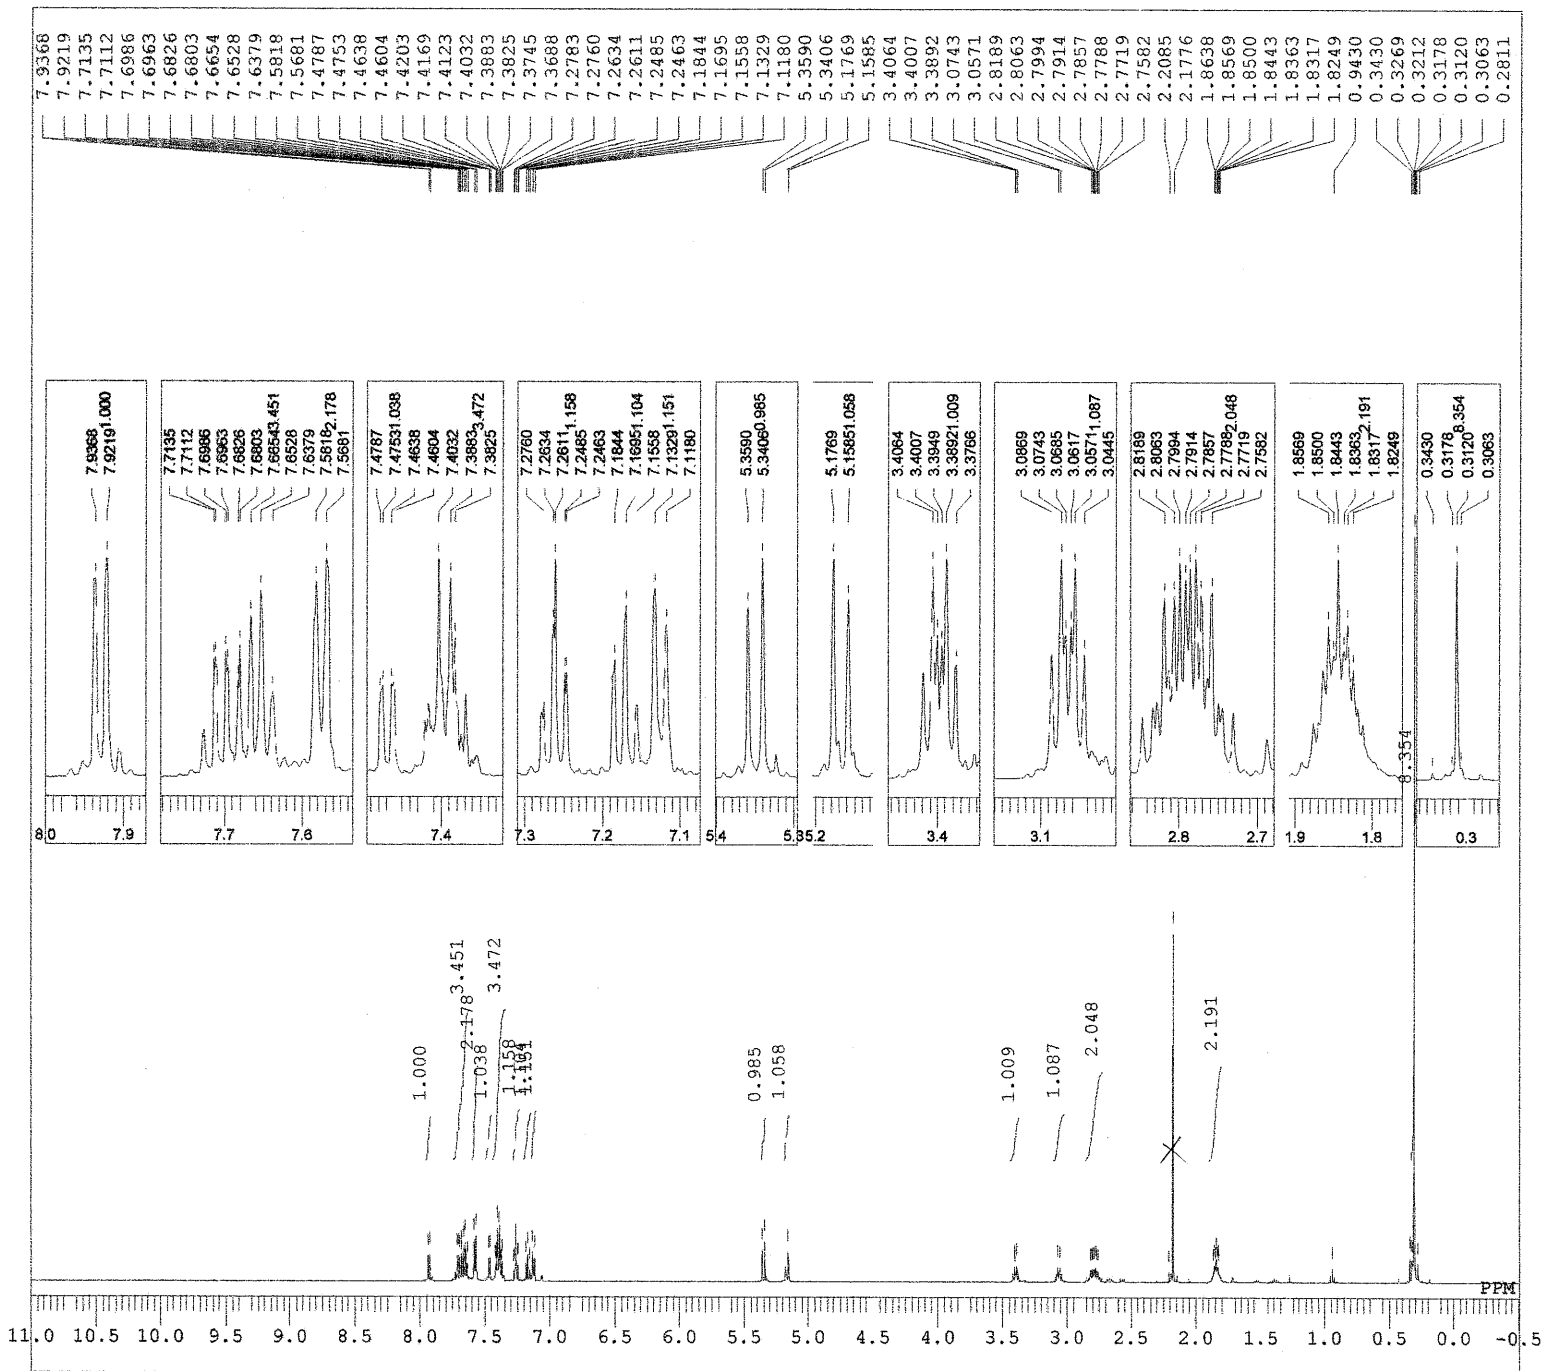

DFILE ozawa07-034\_1h.als  
 COMTM 2-TMS-Ph, Bn  
 DATIM 2015-03-09 10:43:25  
 OBNUC 1H  
 EXMOD proton.jxp  
 OBFREQ 500.16 MHz  
 OBSET 2.41 KHz  
 OBFIN 6.01 Hz  
 POINT 13107  
 FREQU 7507.51 Hz  
 SCANS 4  
 ACQTM 1.7459 sec  
 PD 5.0000 sec  
 PWL 5.55 usec  
 IRNUC 1H  
 CTEMP 24.6 c  
 SLVNT CDCL3  
 EXREF 7.26 ppm  
 BF 0.12 Hz  
 RGAIN 26

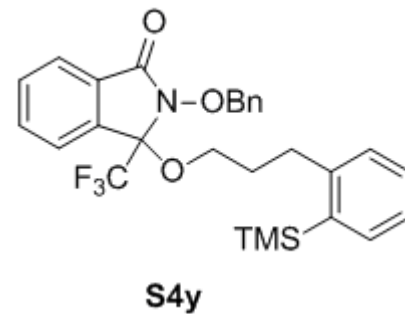

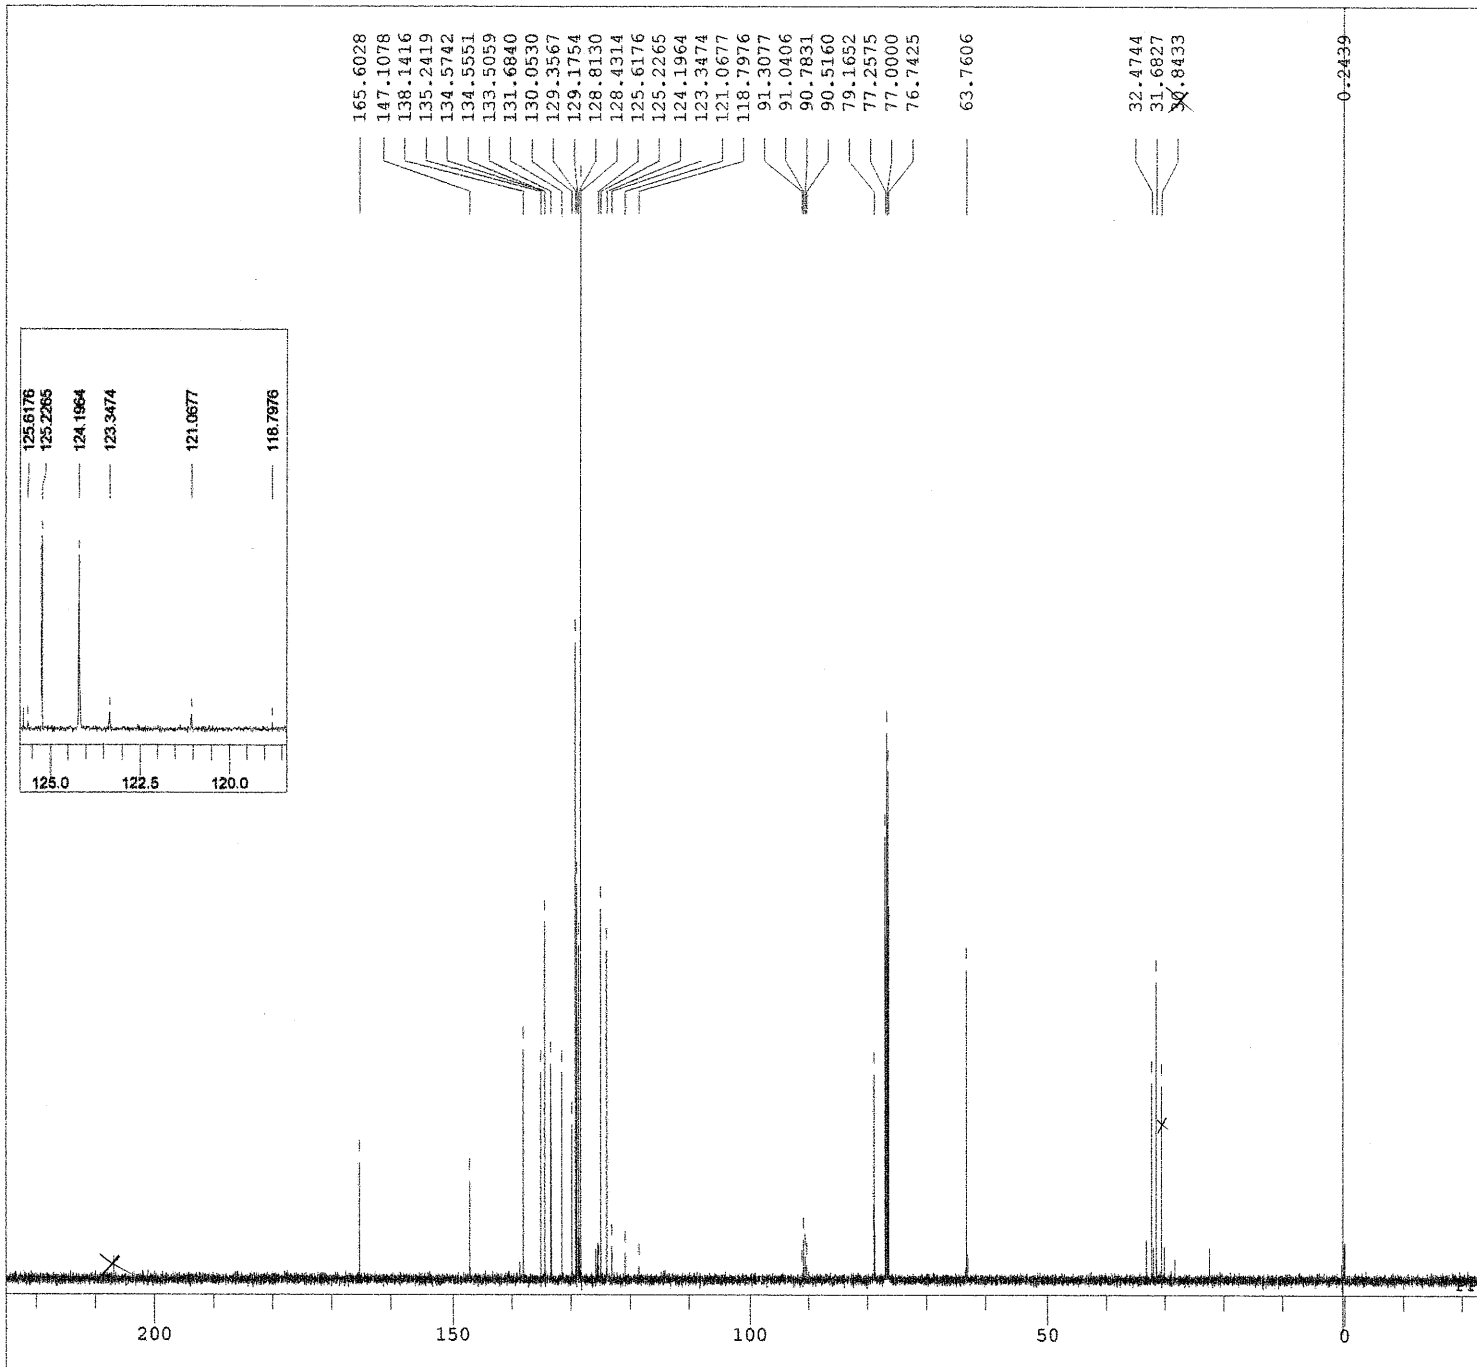

DFILE ozawa07-034\_13C.als  
 COMNT 2-TMS-Ph, Bn  
 DATIM 2015-03-09 10:44:27  
 OBNUC 13C  
 EXMOD carbon.jsp  
 OBFRQ 125.77 MHz  
 OBSSET 7.87 KHz  
 OBFIN 4.21 Hz  
 POINT 26214  
 FREQU 31446.54 Hz  
 SCANS 368  
 ACQTM 0.8336 sec  
 PD 2.0000 sec  
 PW1 3.40 usec  
 IRNUC 1H  
 CTEMP 25.0 c  
 SLVNT CDCL3  
 EXREF 77.00 ppm  
 BF 0.12 Hz  
 RGAIN 60

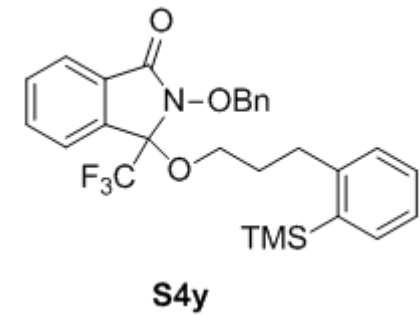

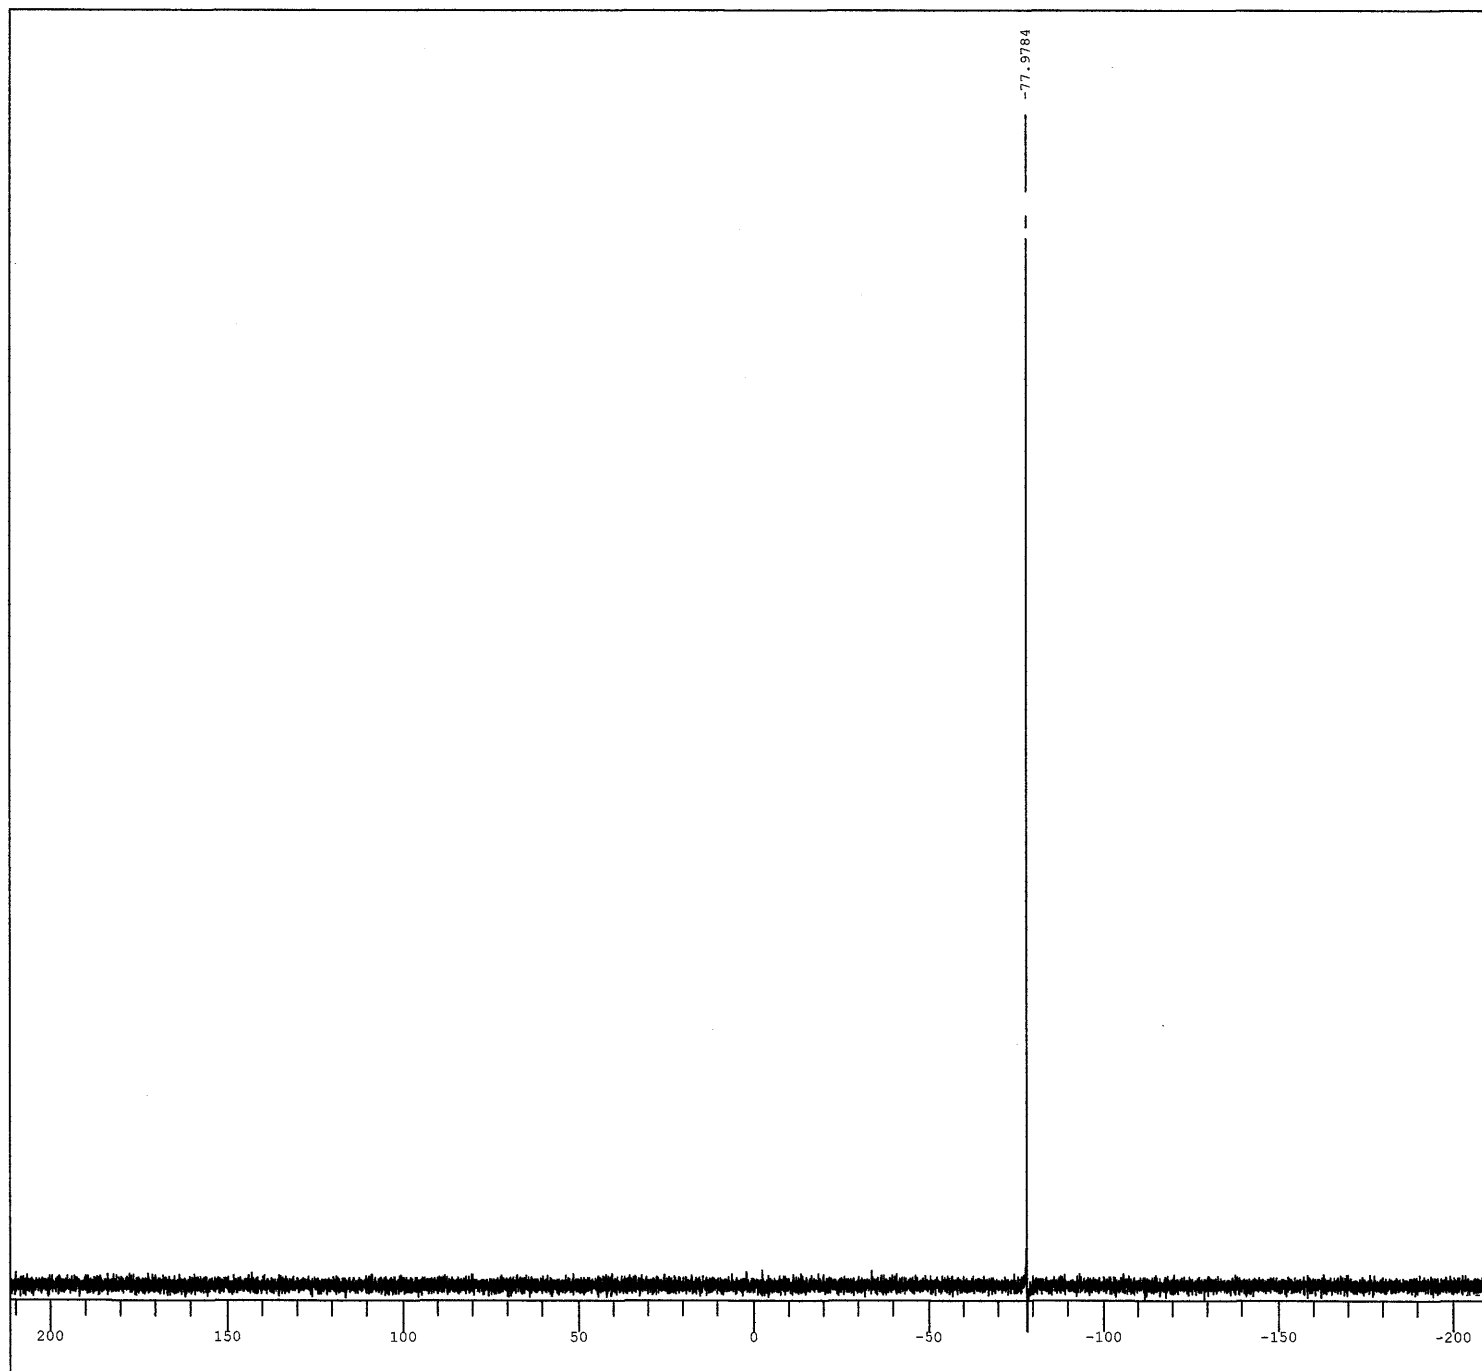

DFILE ozawa07-034\_19F.jdf  
COMNT 2-TMS-Ph, Bn  
DATIM 21-03-2015 12:09:18  
OBNUC 19F  
EXMOD proton.jxp  
OBFRQ 368.64 MHz  
OBSET 7.63 KHz  
OBFIN 2.85 Hz  
POINT 16384  
FREQU 195312.50 Hz  
SCANS 4  
ACQTM 0.0839 sec  
PD 5.0000 sec  
PWL 3.90 usec  
IRNUC 19F  
CTEMP 25.1 c  
SLVNT CDCL3  
EXREF -164.90 ppm  
BF 0.12 Hz  
RGAIN 50

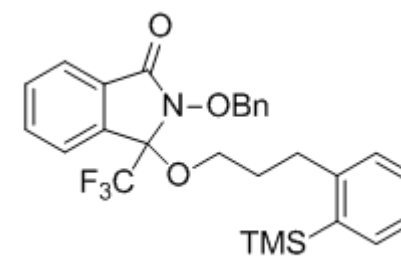

S4y

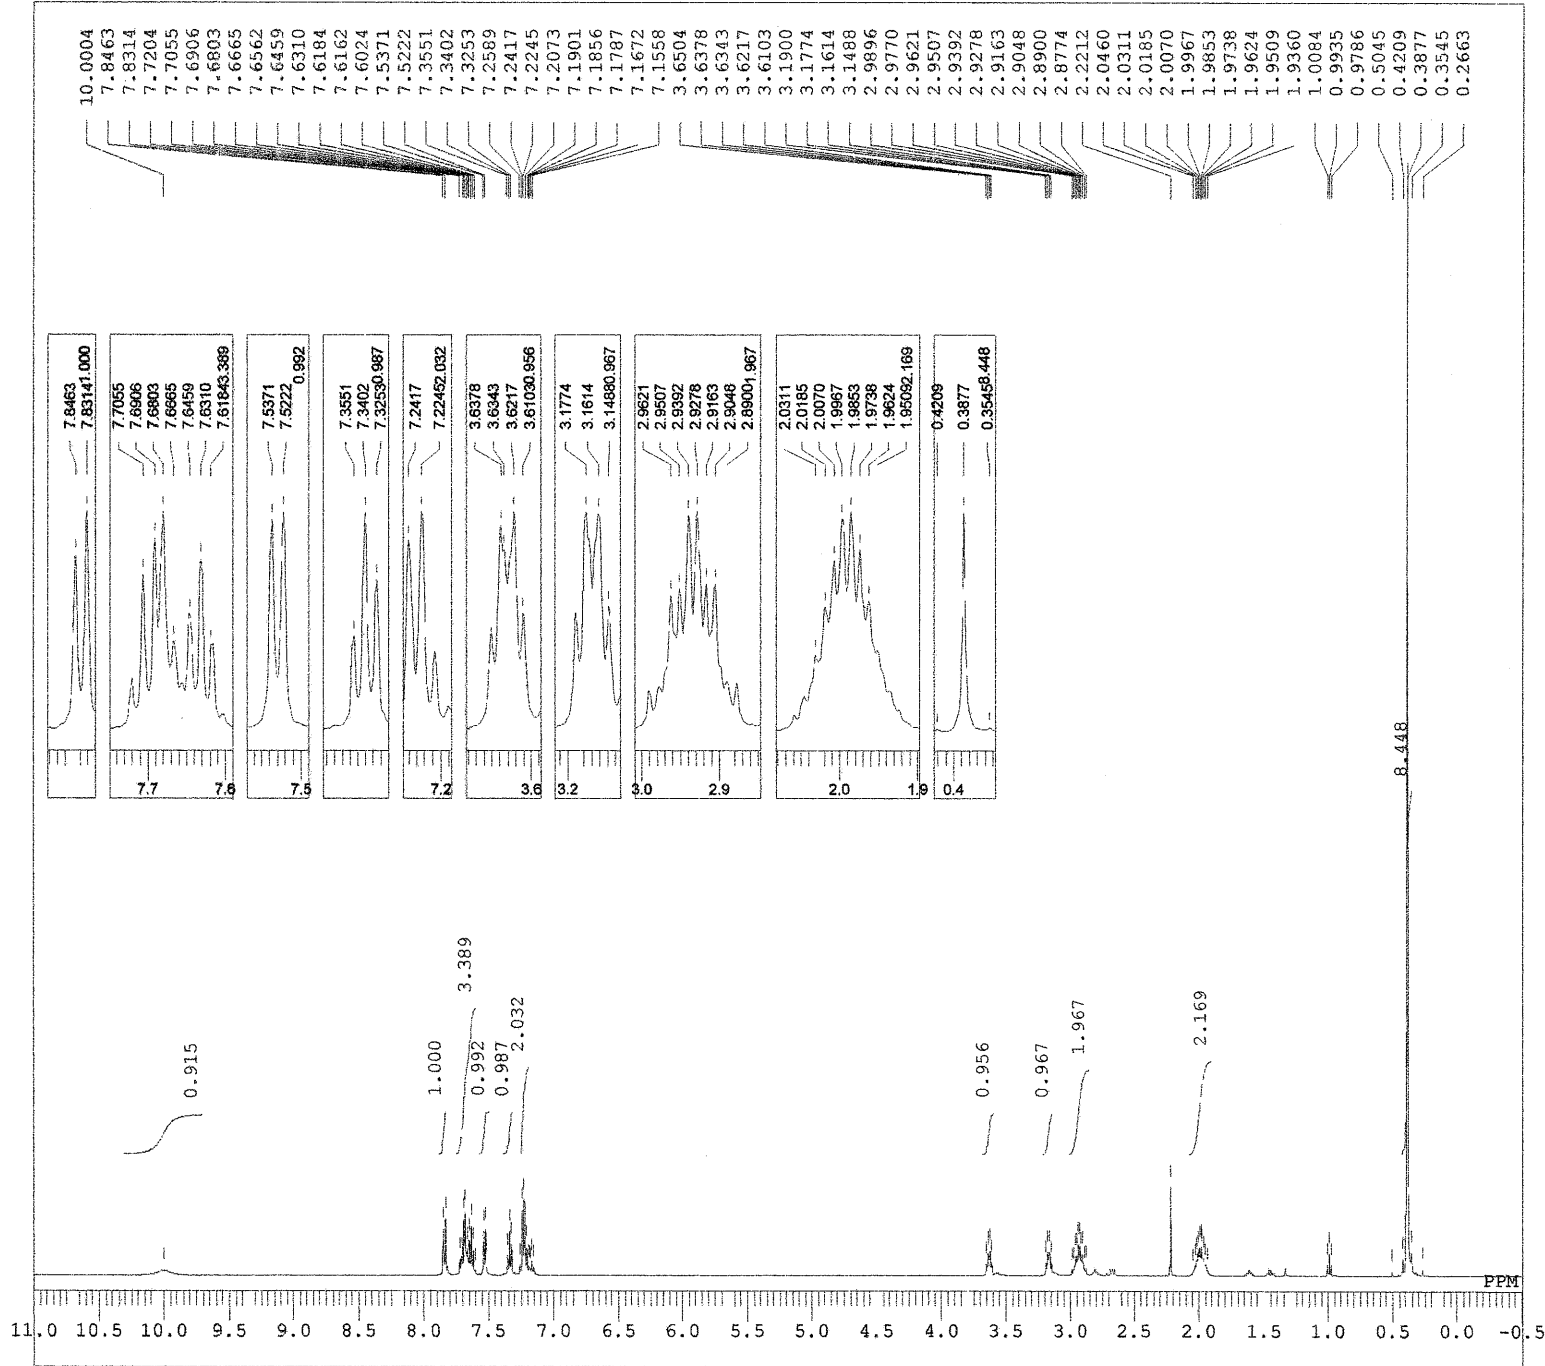

DFILE ozawa07-035\_1h.jdf  
 COMNT 2-TMS-Ph, OH  
 DATIM 2015-03-24 08:49:33  
 OBNUC 1H  
 EXMOD proton.jxp  
 OBFREQ 500.16 MHz  
 OBSSET 2.41 KHz  
 OBFIN 6.01 Hz  
 POINT 16384  
 FREQU 9384.38 Hz  
 SCANS 4  
 ACQTM 1.7459 sec  
 PD 5.0000 sec  
 PW1 5.55 usec  
 IRNUC 1H  
 CTEMP 27.1 c  
 SLVNT CDCL3  
 EXREF 7.26 ppm  
 BF 0.20 Hz  
 RGAIN 20

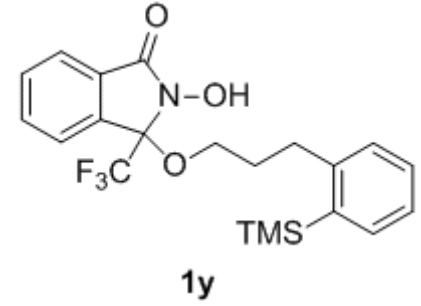

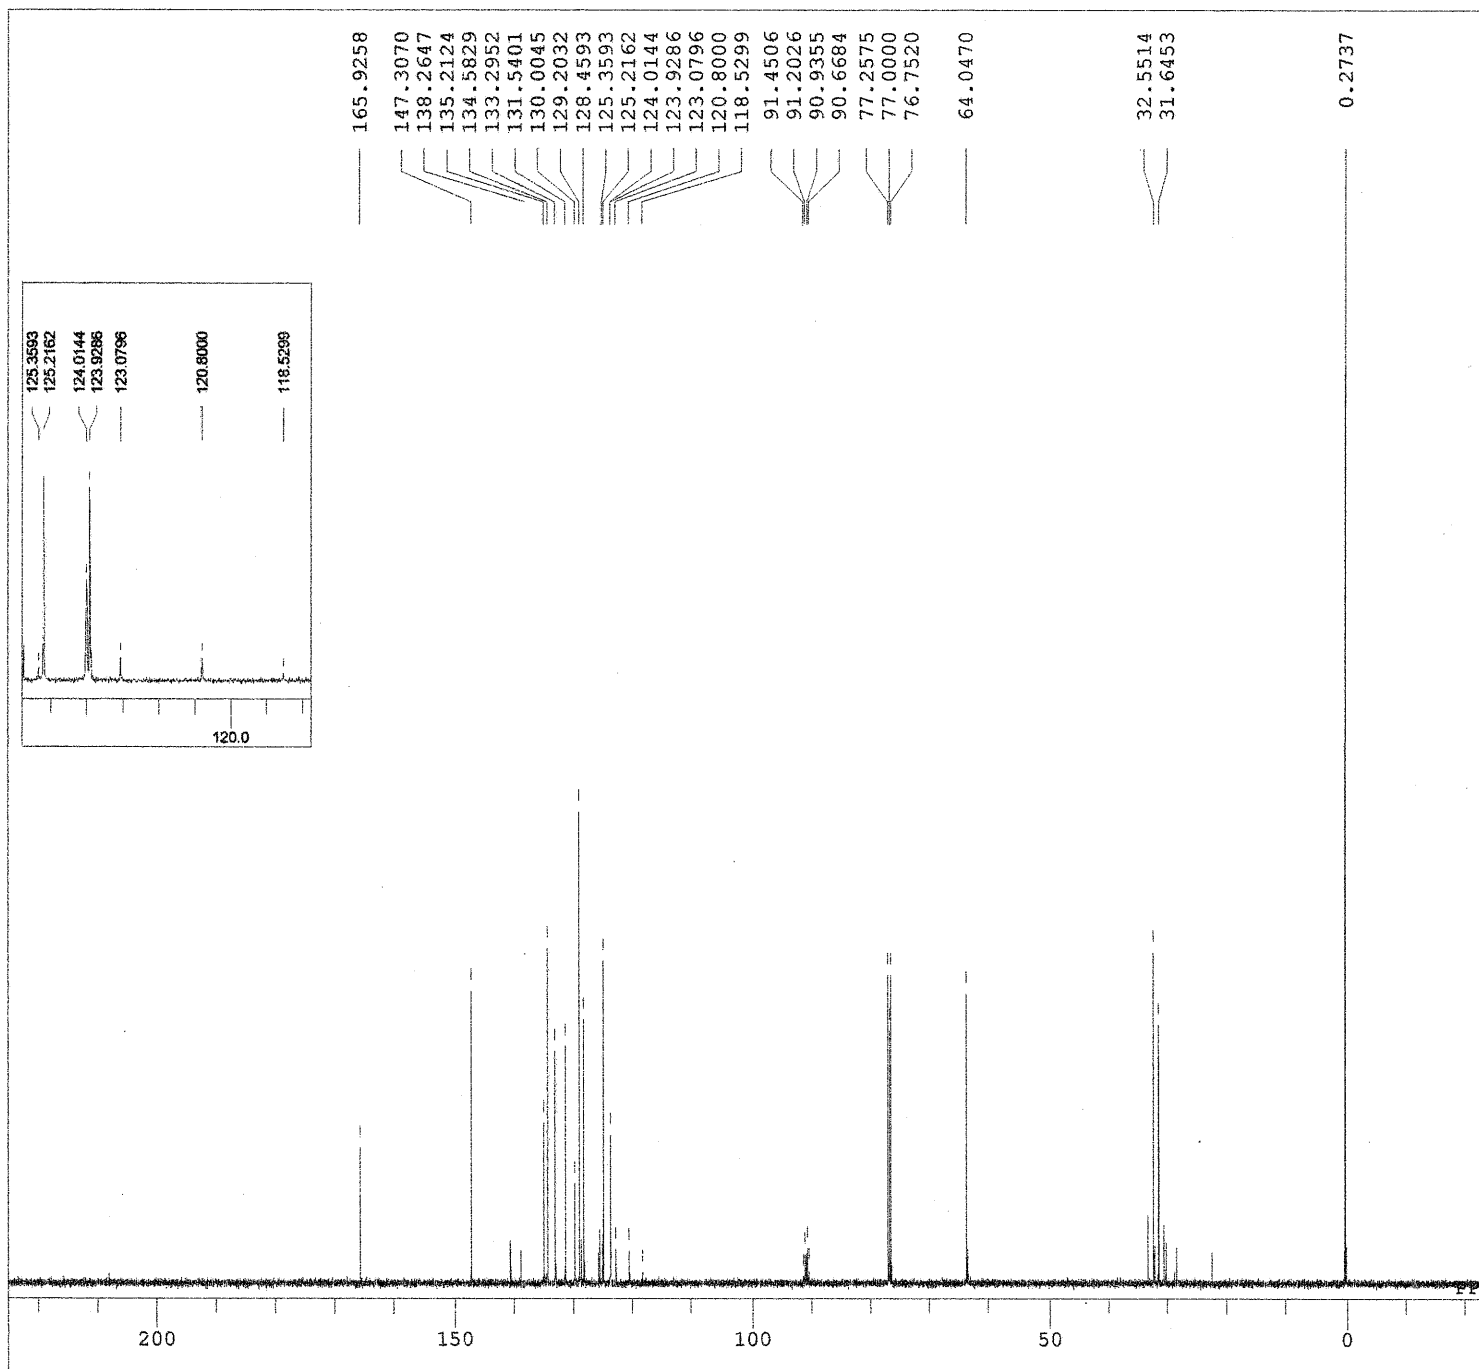

DFILE ozawa07-035\_13C.jdf  
 COMNT 2-TMS-Ph, OH  
 DATIM 2015-03-24 08:50:36  
 OBNUC 13C  
 EXMOD carbon.jxp  
 OBFRQ 125.77 MHz  
 OBSET 7.87 KHz  
 OBFIN 4.21 Hz  
 POINT 32767  
 FREQU 39308.18 Hz  
 SCANS 240  
 ACQTM 0.8336 sec  
 PD 2.0000 sec  
 PW1 3.40 usec  
 IRNUC 1H  
 CTEMP 27.2 c  
 SLVNT CDCL3  
 EXREF 77.00 ppm  
 BF 0.20 Hz  
 RGAIN 60

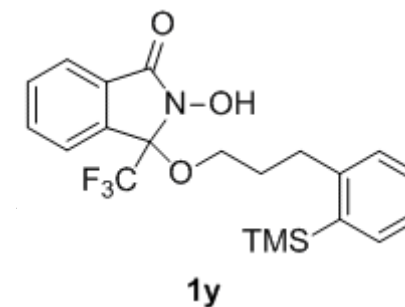

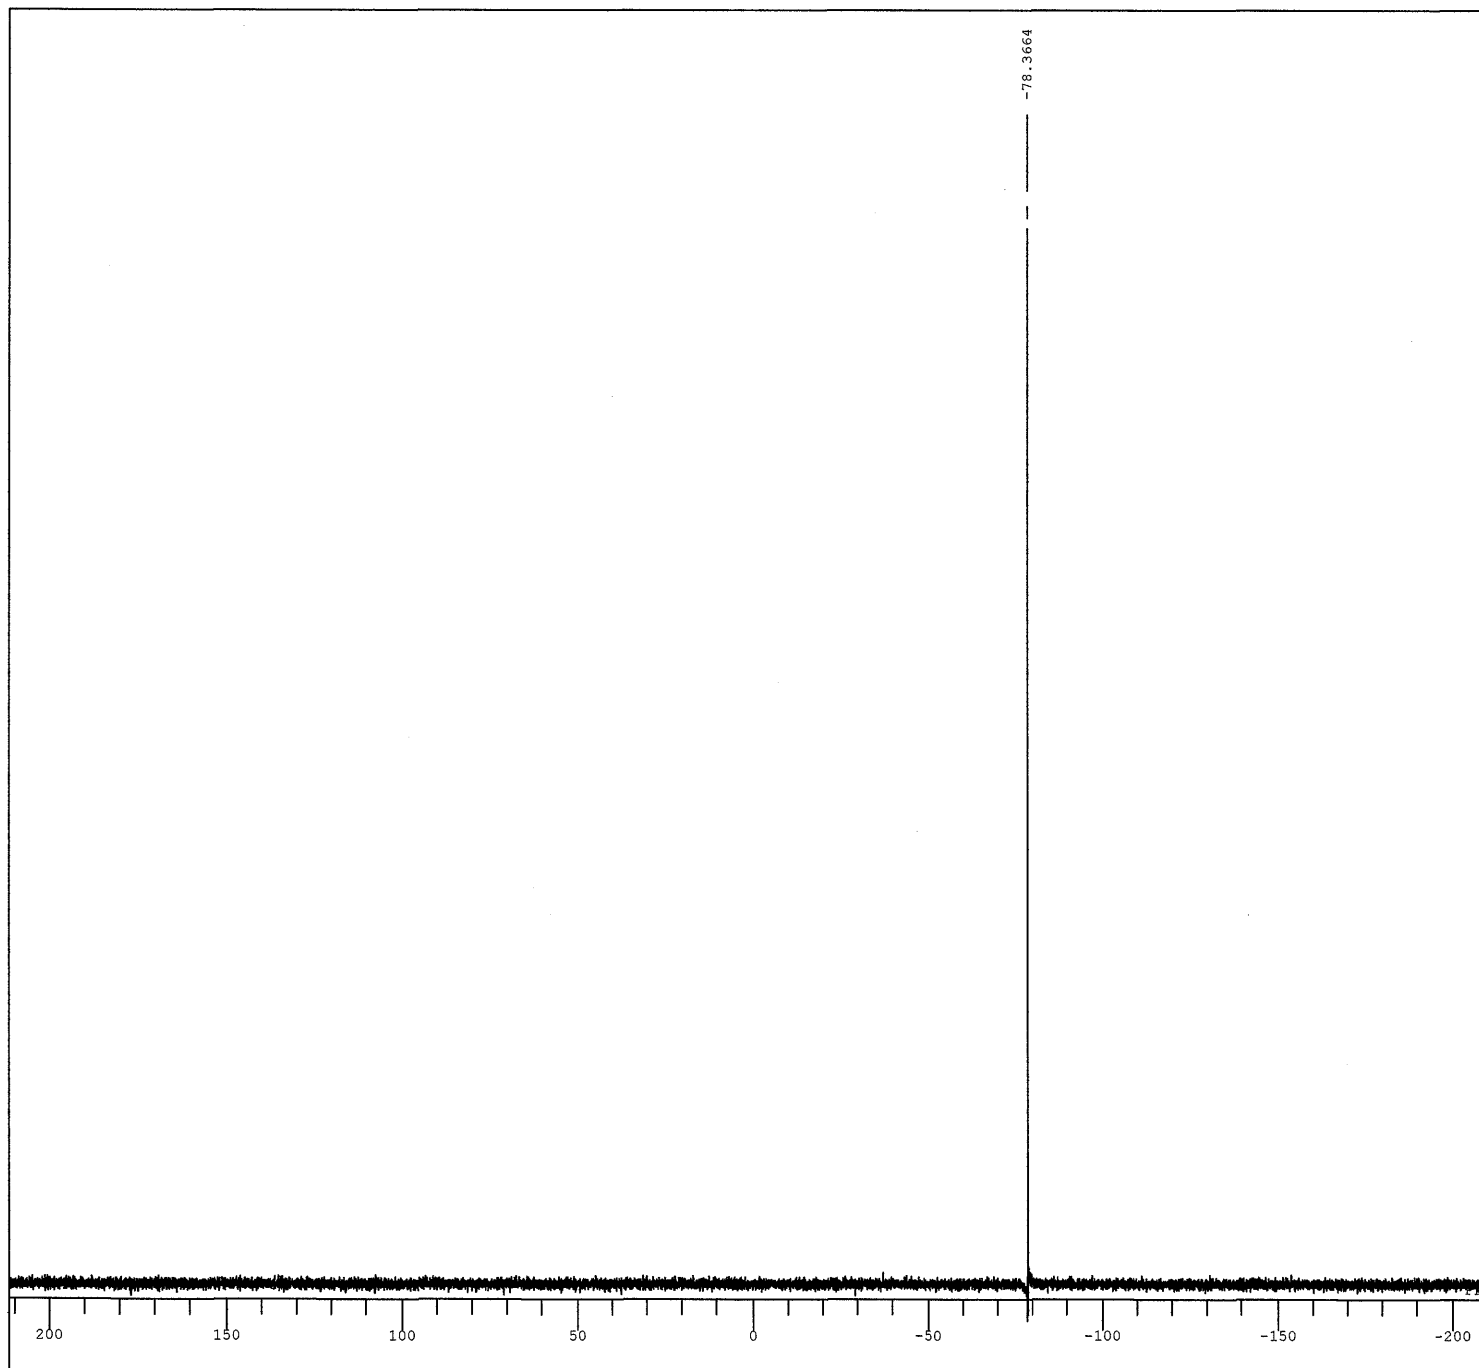

DFILE ozawa07-035 19F.jdf  
COMNT 2-TMS-Ph, OH  
DATIM 21-03-2015 11:43:48  
OBNUC 19F  
EXMOD proton.jxp  
OBFREQ 368.64 MHz  
OBSETE 7.63 KHz  
OBFIN 2.85 Hz  
POINT 16384  
FREQU 195312.50 Hz  
SCANS 4  
ACQTM 0.0839 sec  
PD 5.0000 sec  
PW1 3.90 usec  
IRNUC 19F  
CTEMP 25.1 c  
SLVNT CDCL3  
EXREF -164.90 ppm  
BF 0.12 Hz  
RGAIN 50

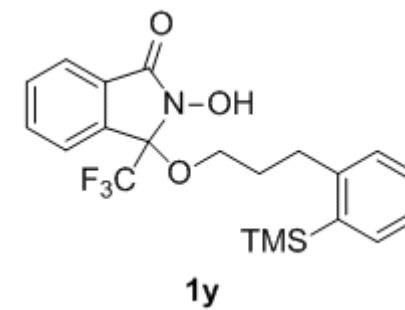



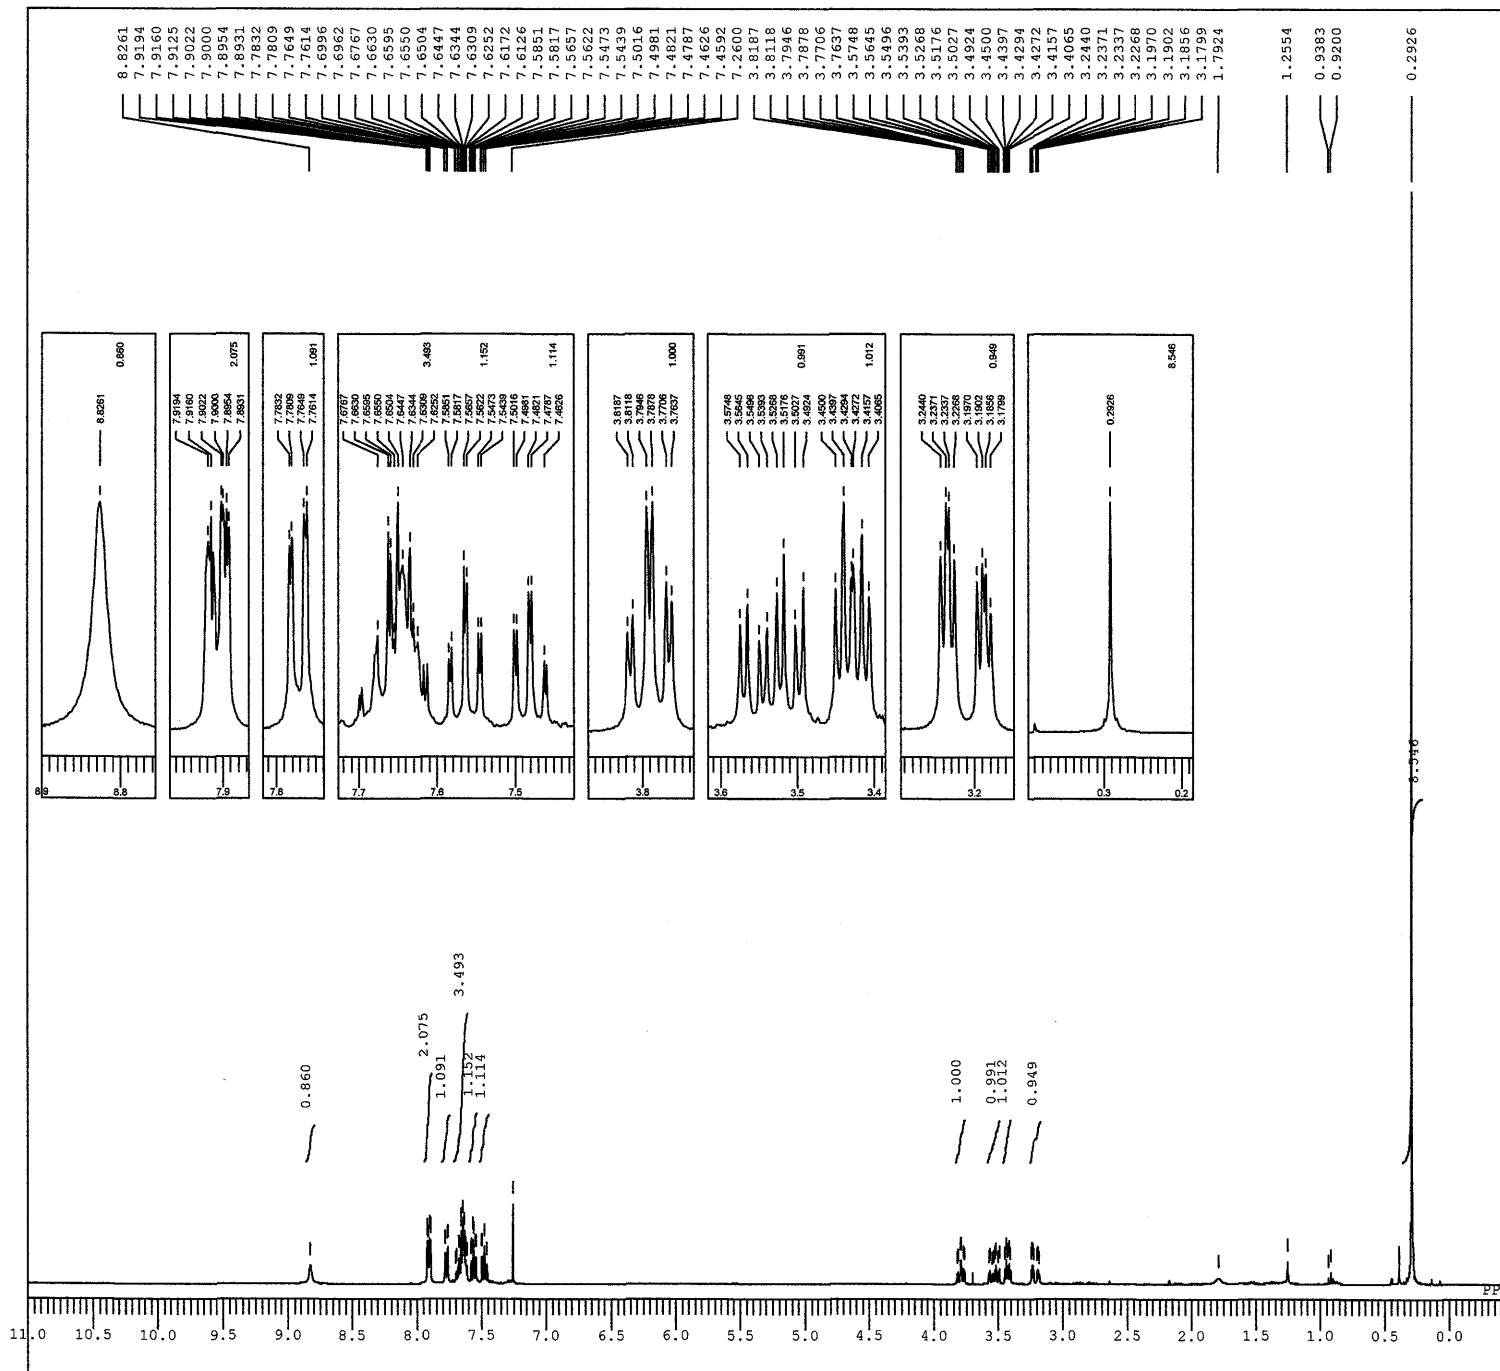

DFILE ozawa07-038 1H.jdf  
 COMNT 2-TMS-Ph, [O]  
 DATIM 21-03-2015 08:26:35  
 OBNUC 1H  
 EXMOD proton.jxp  
 OBFREQ 391.78 MHz  
 OBSFET 8.51 KHz  
 OBFIN 3.34 Hz  
 POINT 16384  
 FREQU 7348.62 Hz  
 SCANS 4  
 ACQTM 2.2295 sec  
 PD 5.0000 sec  
 PW1 4.99 usec  
 IRNUC 1H  
 CTEMP 25.1 c  
 SLVNT CDCL3  
 EXREF 7.26 ppm  
 BF 0.12 Hz  
 RGAIN 38

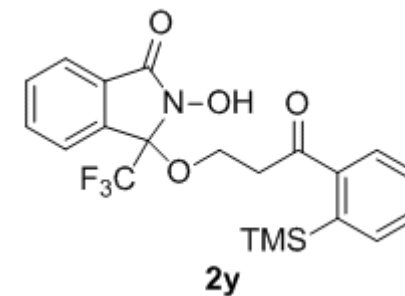

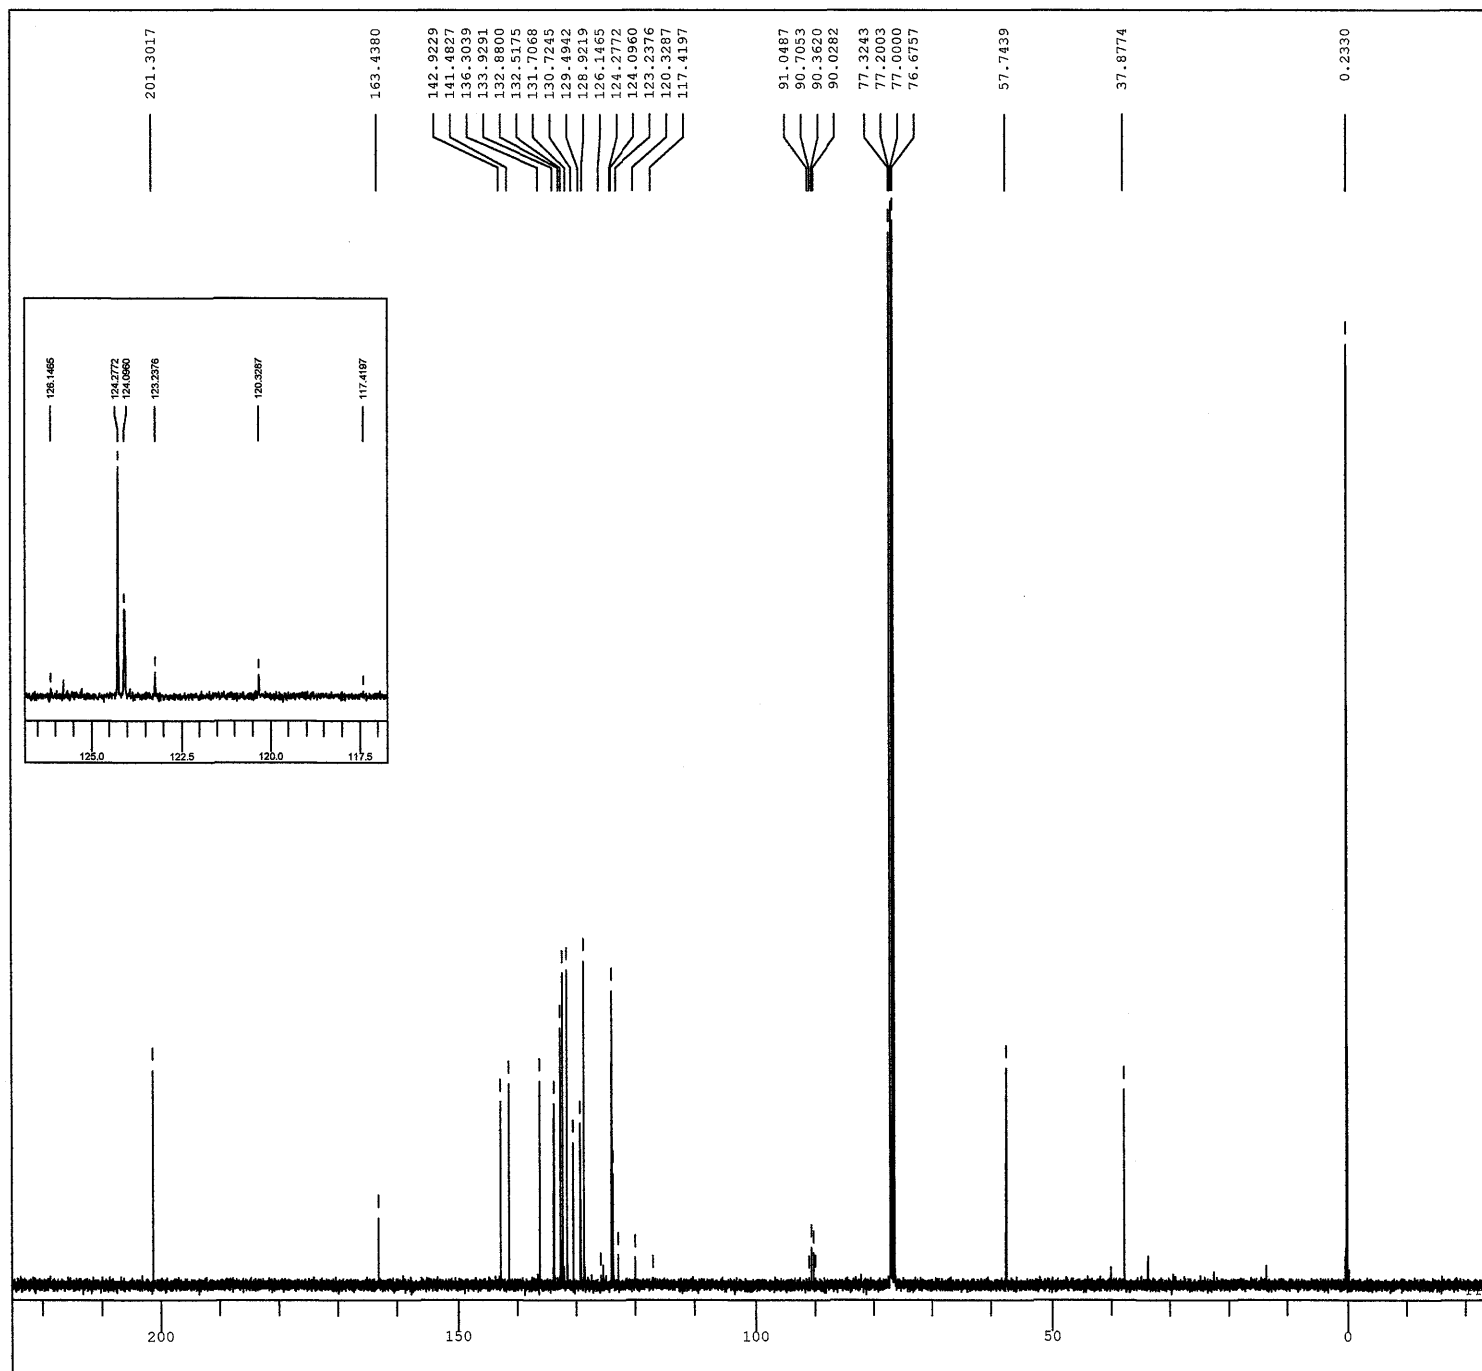

DFILE ozawa07-038\_13c.jdf  
 COMNT 2-TMS-Ph, [O]  
 DATIM 21-03-2015 08:31:52  
 OBNUC 13C  
 EXMOD carbon.jxp  
 OBFREQ 98.52 MHz  
 OBSETE 4.64 KHz  
 OBFIN 8.74 Hz  
 POINT 32767  
 FREQU 30788.18 Hz  
 SCANS 2360  
 ACQTM 1.0643 sec  
 PD 2.0000 sec  
 PW1 3.16 usec  
 IRNUC 1H  
 CTEMP 25.2 c  
 SLVNT CDCL3  
 EXREF 77.00 ppm  
 BF 0.12 Hz  
 RGAIN 60

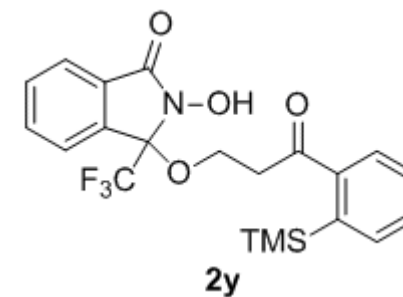

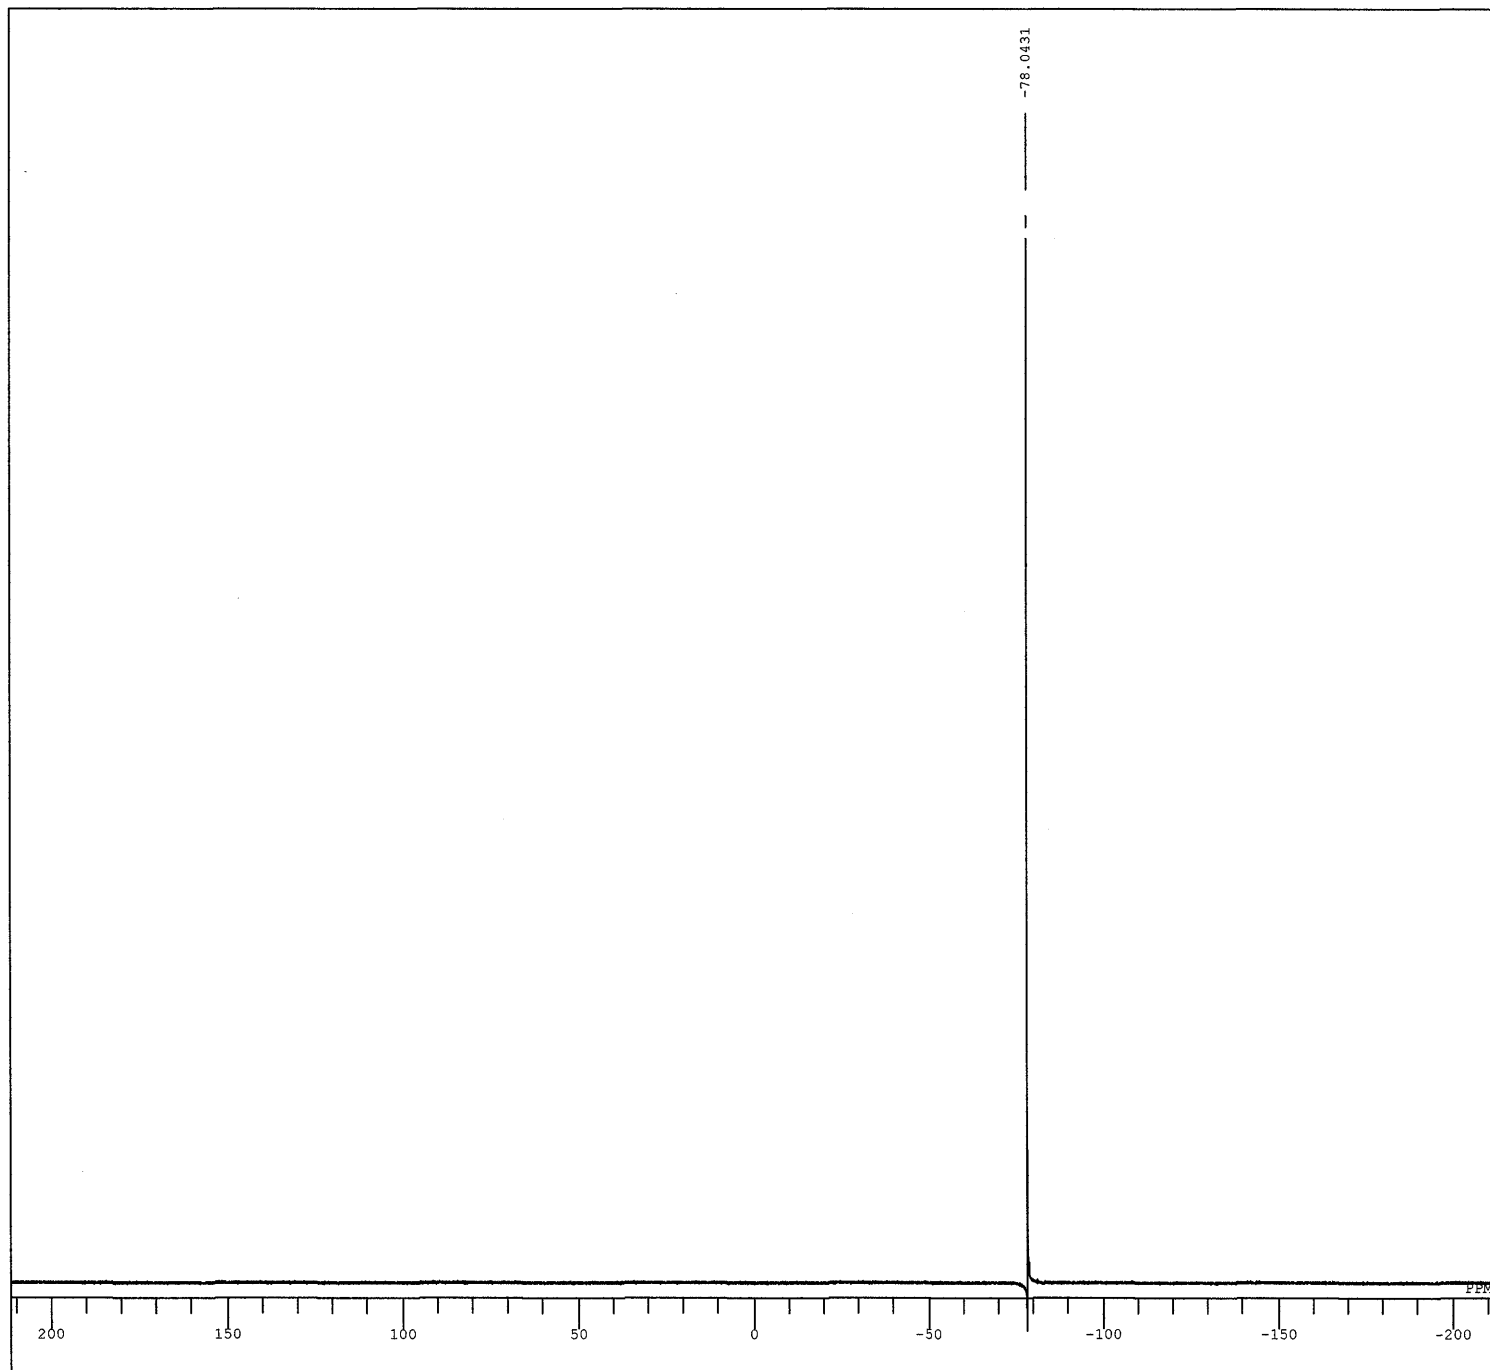

DFILE ozawa07-038\_19F.jdf  
COMNT 2-TMS-Ph, [O]  
DATIM 21-03-2015 08:24:23  
OBNUC 19F  
EXMOD proton.jxp  
OBFRO 368.64 MHz  
OBSEF 7.63 KHz  
OBFIN 2.85 Hz  
POINT 16384  
FREQU 195312.50 Hz  
SCANS 4  
ACQTM 0.0839 sec  
PD 5.0000 sec  
PW1 3.90 usec  
IRNUC 19F  
CTEMP 25.1 c  
SLVNT CDCL3  
EXREF -164.90 ppm  
BF 0.12 Hz  
RGAIN 50

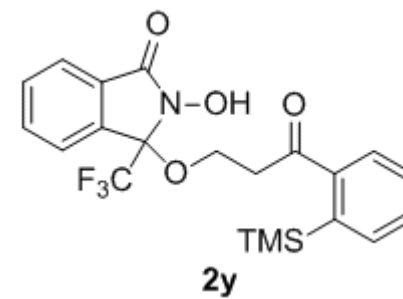

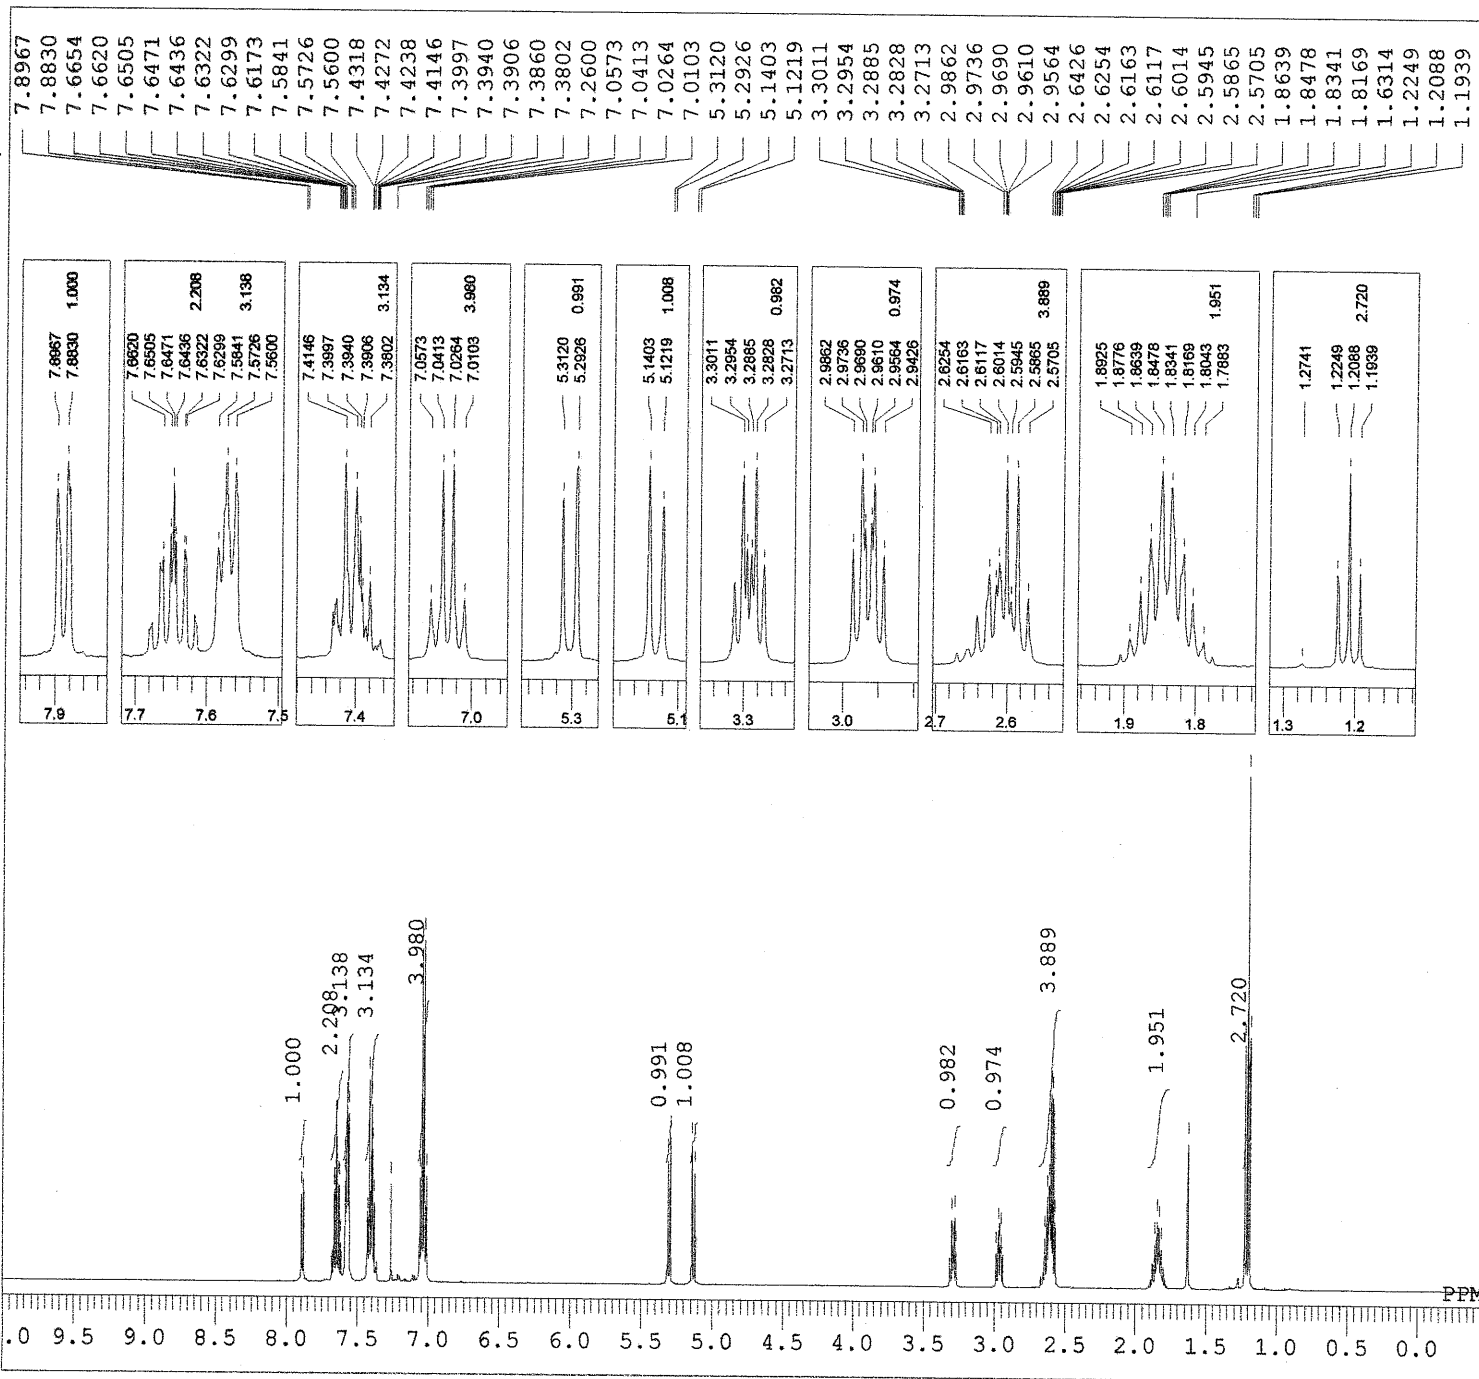

```

DFILE  ozawa05-050_1H.jdf
COMNT  PhEt, Bn
DATIM  2014-08-15 12:19:02
OBNUC  1H
EXMOD  proton.jxp
OBFRQ   500.16 MHz
OBSET   2.41 KHz
OBFIN   6.01 Hz
POINT   16384
FREQU   9384.38 Hz
SCANS   4
ACQTM   1.7459 sec
PD       5.0000 sec
PW1     5.55 usec
IRNUC   1H
CTEMP   25.7 c
SLVNT   CDCL3
EXREF   7.26 ppm
BF       0.12 Hz
RGAIN   34
    
```

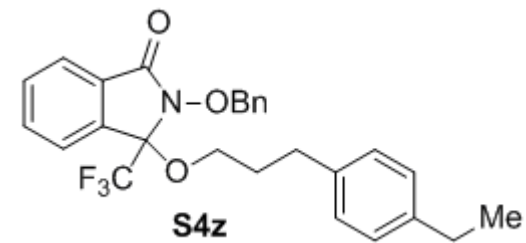

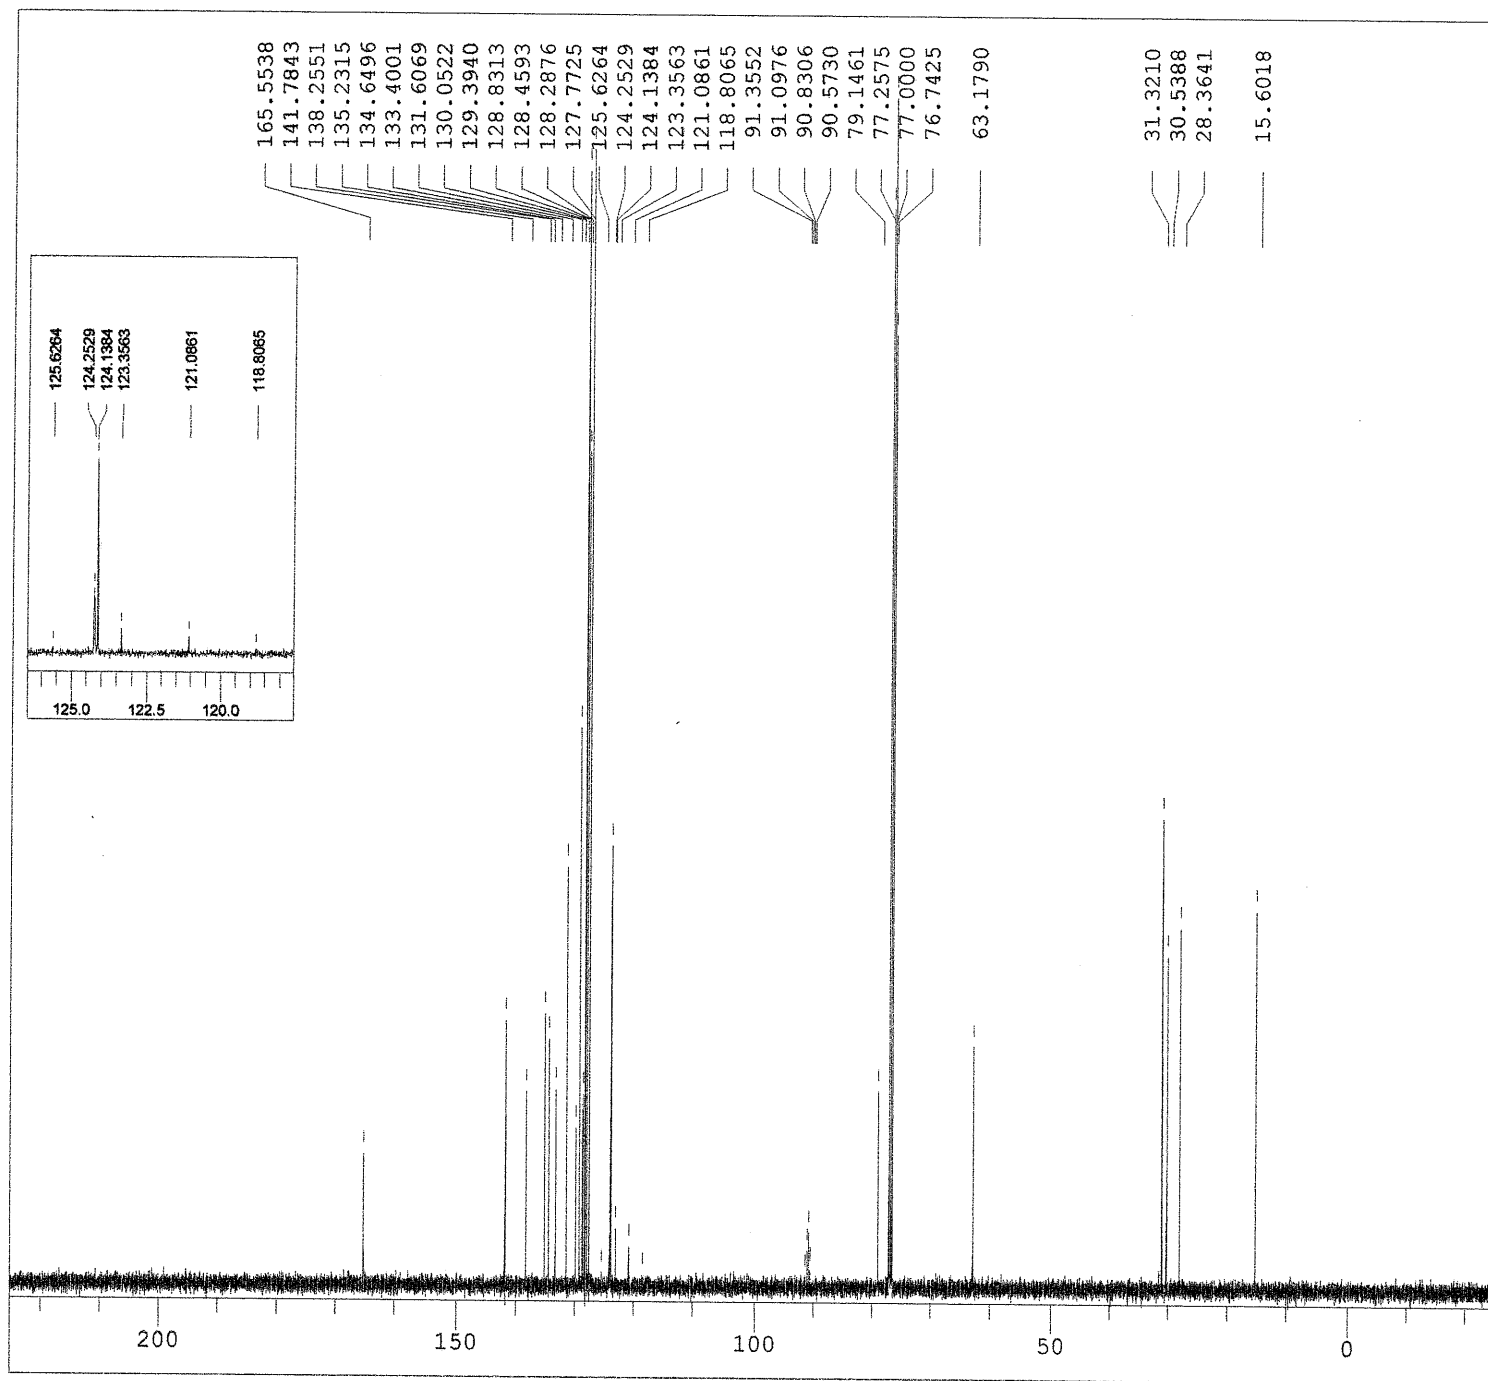

```

DFILE ozawa05-050_13C_copy2-1-1.jdf
COMNT PhEt, Bn
DATIM 2014-08-15 12:20:06
OBNUC 13C
EXMOD carbon.jxp
OBFRQ 125.77 MHz
OBSET 7.87 KHz
OBFIN 4.21 Hz
POINT 32767
FREQ 39308.18 Hz
SCANS 444
ACQTM 0.0000 sec
PD 3.0000 sec
PW1 3.40 usec
IRNUC 1H
CTEMP 26.2 c
SLVNT CDCL3
EXREF 77.00 ppm
BF 0.12 Hz
RGAIN 60

```



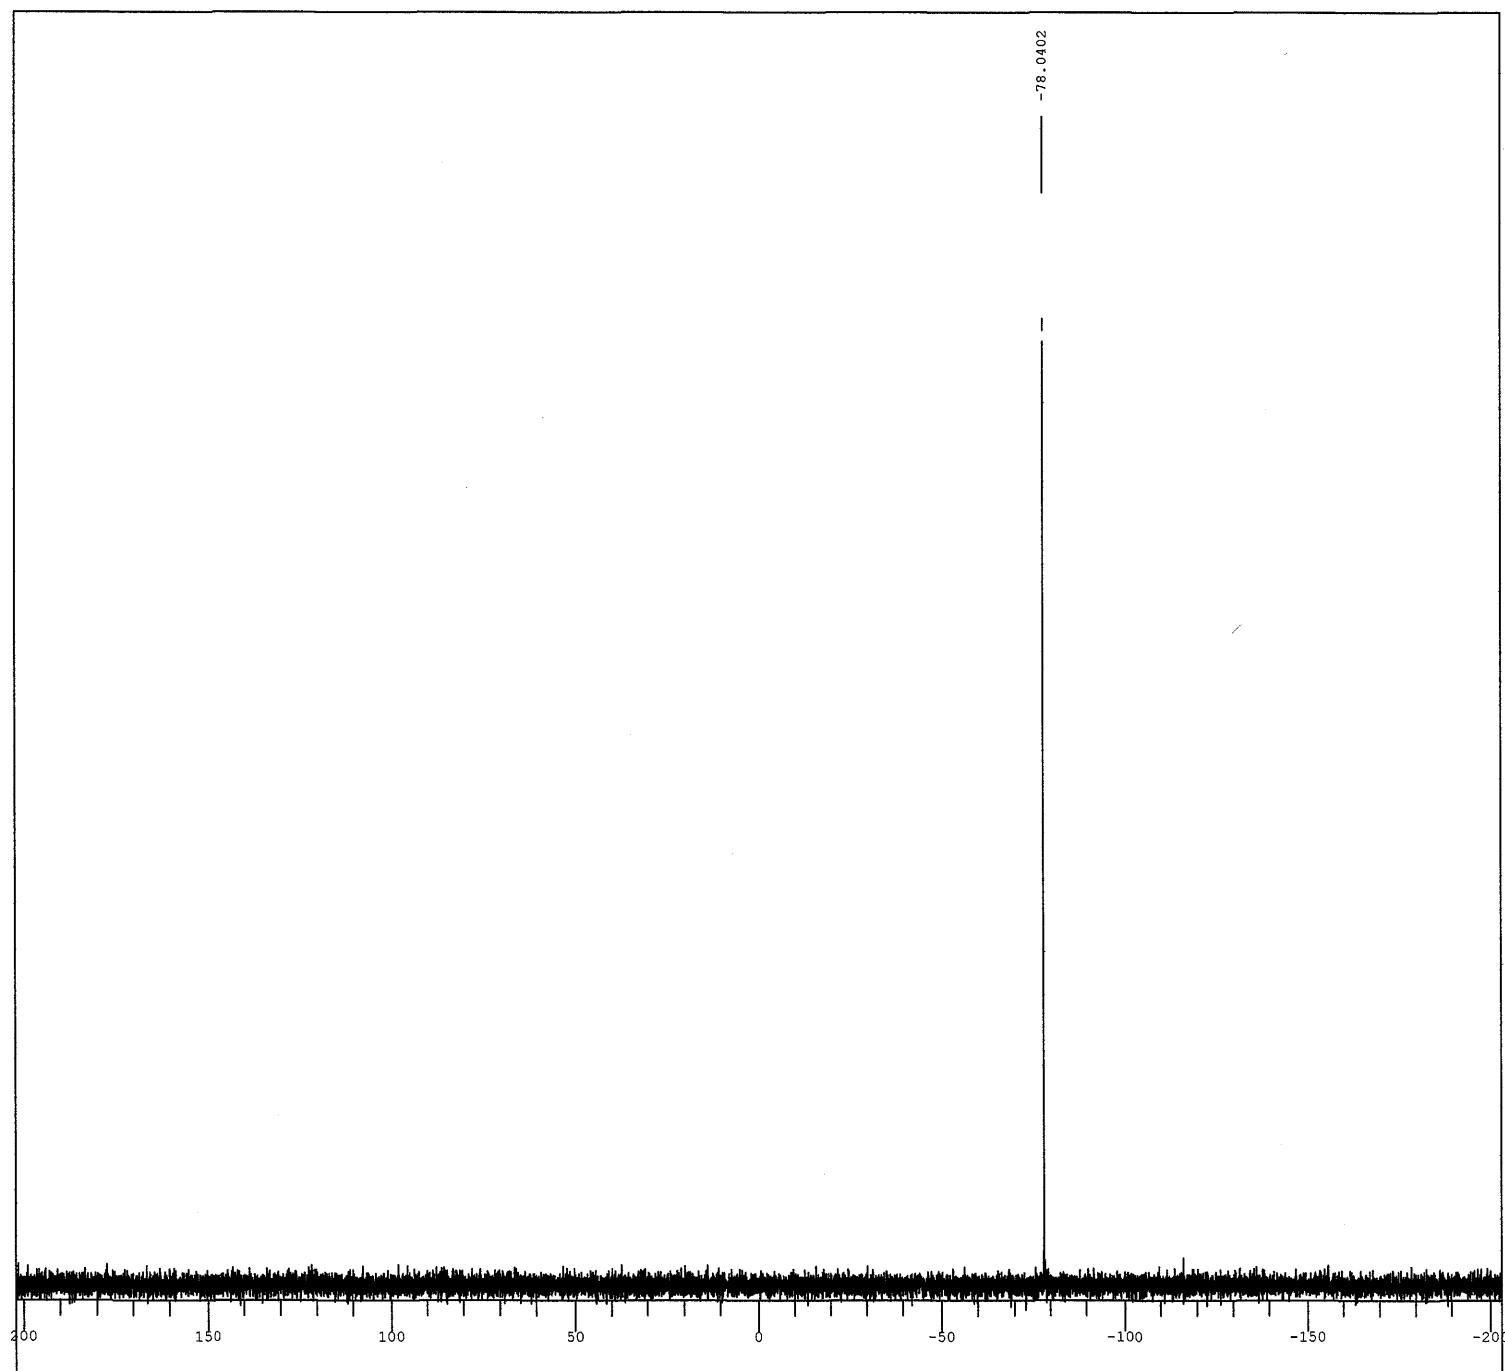

DFILE ozawa05-050\_19F.jdf  
COMNT Ph-Et  
DATIM 14-06-2014 14:47:32  
OBNUC 19F  
EXMOD proton.jxp  
OBFREQ 368.64 MHz  
OBSET 7.63 KHz  
OBFIN 2.85 Hz  
POINT 16384  
FREQU 186567.17 Hz  
SCANS 4  
ACQTM 0.0878 sec  
PD 5.0000 sec  
PW1 3.90 usec  
IRNUC 19F  
CTEMP 23.6 c  
SLVNT CDCL3  
EXREF -164.90 ppm  
BF 0.12 Hz  
RGAIN 56

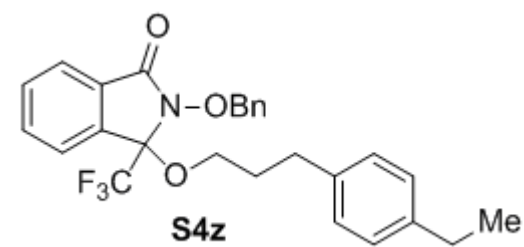

Ph-Et

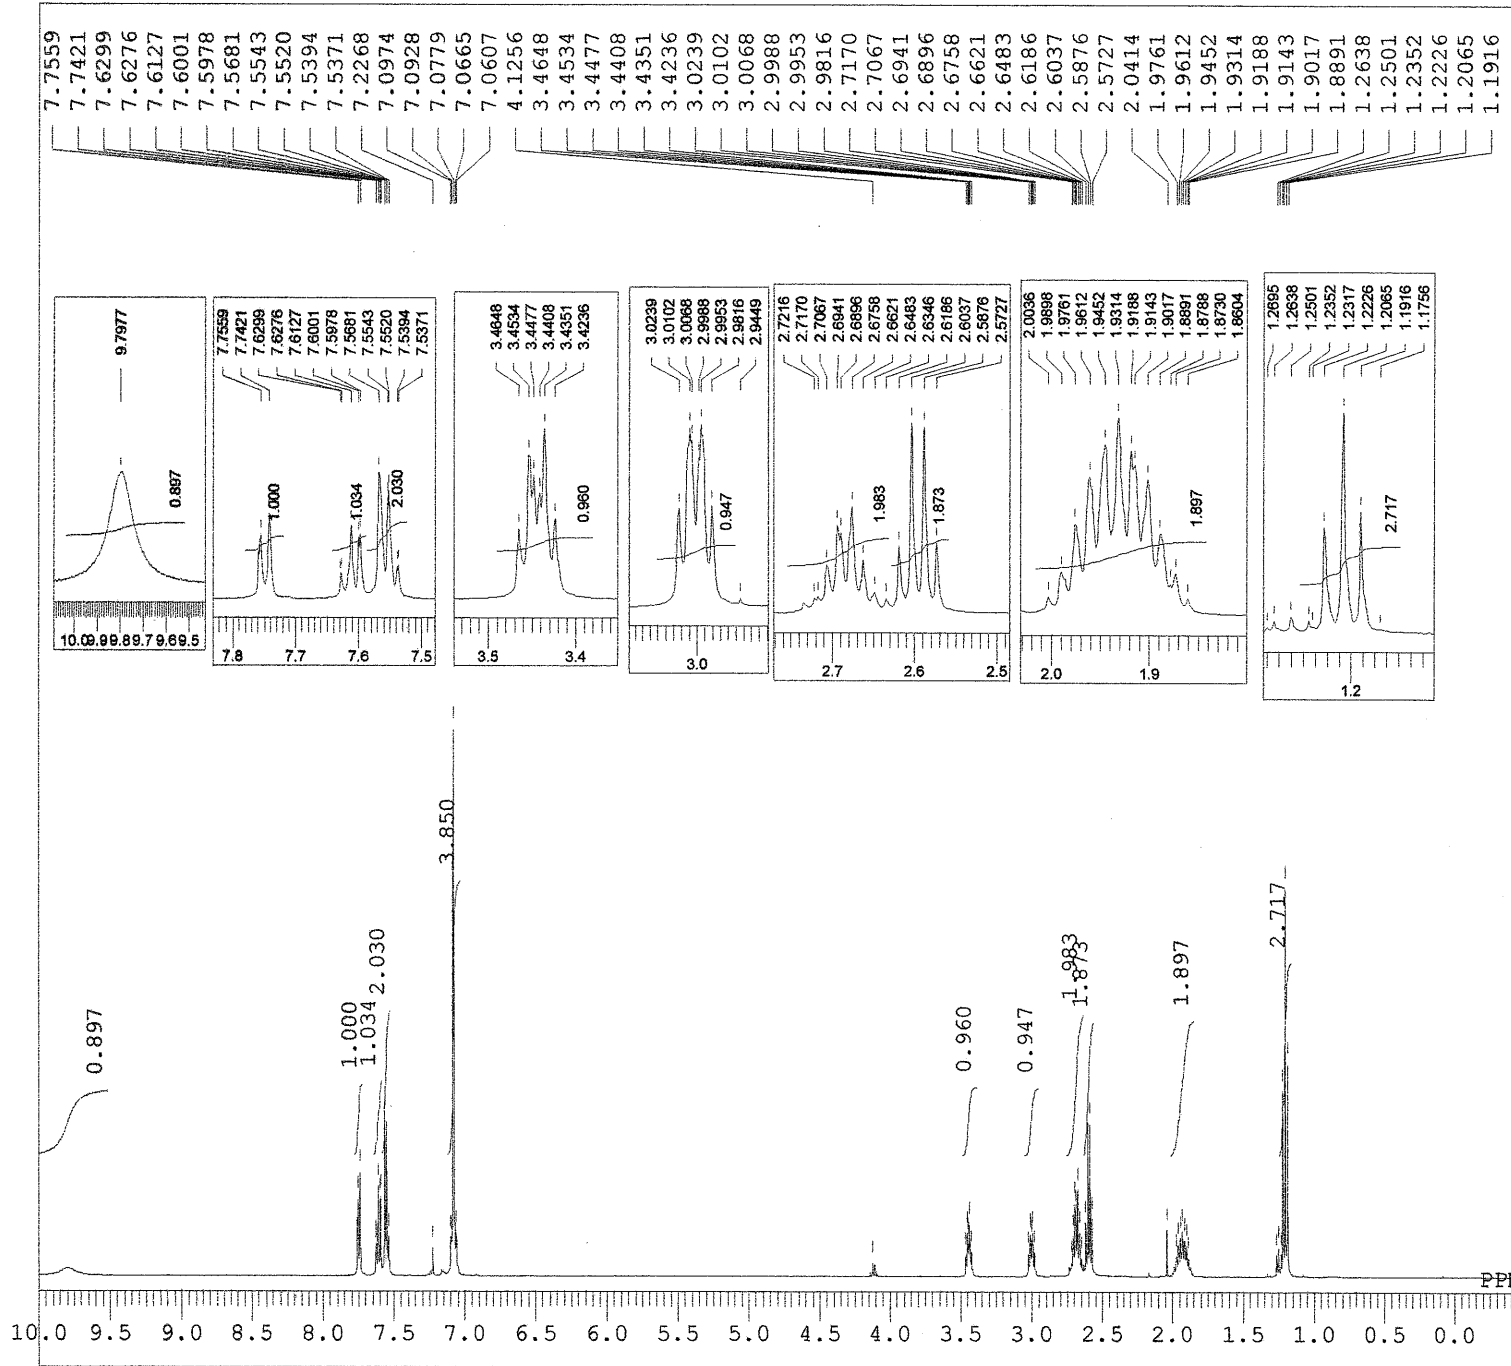

DFILE ozawa05-055\_1H.jdf  
COMNT Ph-Et  
DATIM 2014-06-16 19:48:40  
OBNUC 1H  
EXMOD proton.jxp  
OBFRQ 500.16 MHz  
OBSET 2.41 KHz  
OBFIN 6.01 Hz  
POINT 16384  
FREQU 9384.38 Hz  
SCANS 4  
ACQTM 1.7459 sec  
PD 5.0000 sec  
PW1 5.55 usec  
IRNUC 1H  
CTEMP 25.7 c  
SLVNT CDCL3  
EXREF 7.26 ppm  
BF 0.12 Hz  
RGAIN 28

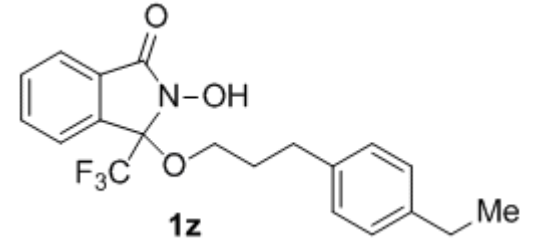

Ph-Et

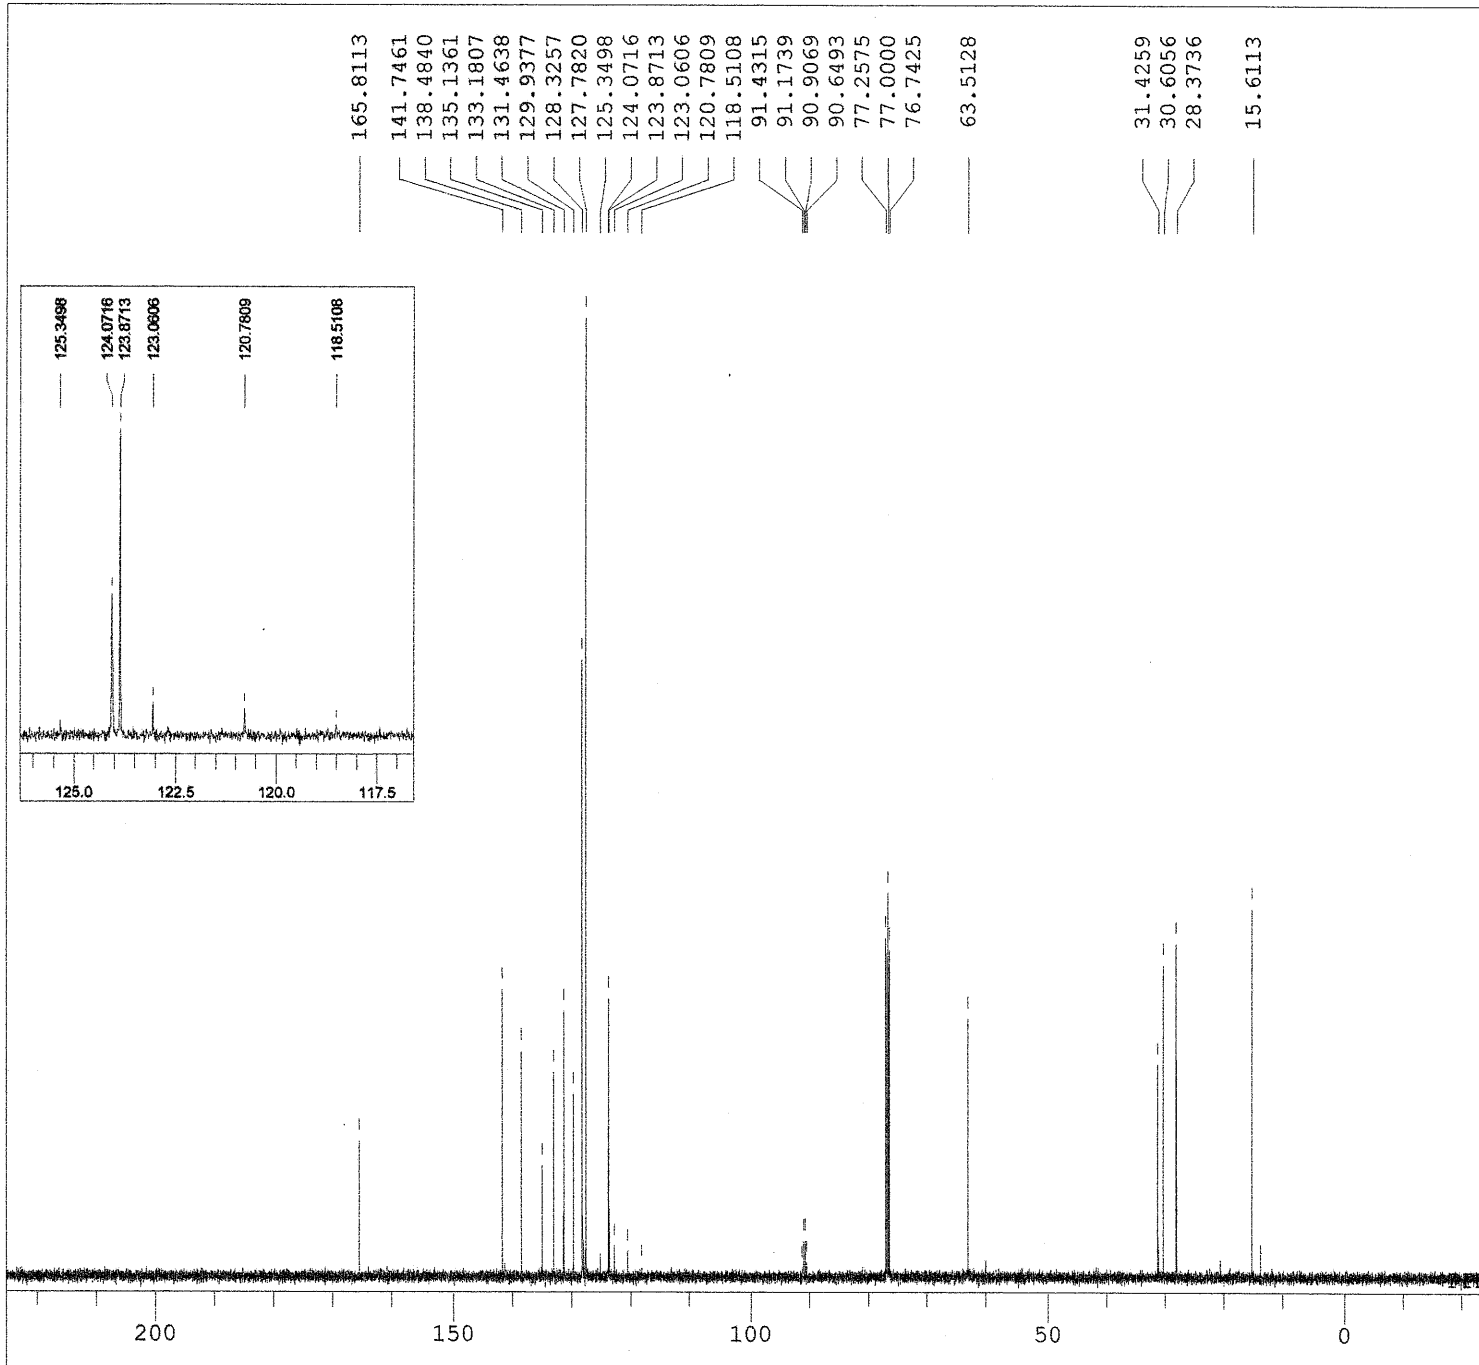

DFILE ozawa05-055\_13C.jdf  
COMNT Ph-Et  
DATIM 2014-06-16 19:49:44  
OBNUC 13C  
EXMOD carbon.jxp  
OBFRQ 125.77 MHz  
OBSET 7.87 KHz  
OBFIN 4.21 Hz  
POINT 32767  
FREQU 39308.18 Hz  
SCANS 108  
ACQTM 0.8336 sec  
PD 3.0000 sec  
PW1 3.40 usec  
IRNUC 1H  
CTEMP 26.0 c  
SLVNT CDCL3  
EXREF 77.00 ppm  
BF 0.12 Hz  
RGAIN 60

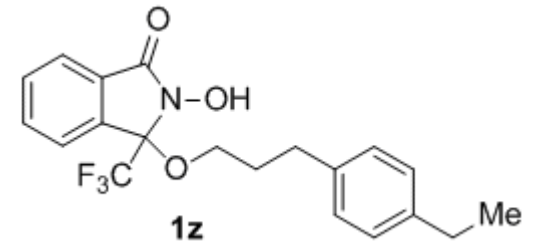



PhEt, OH

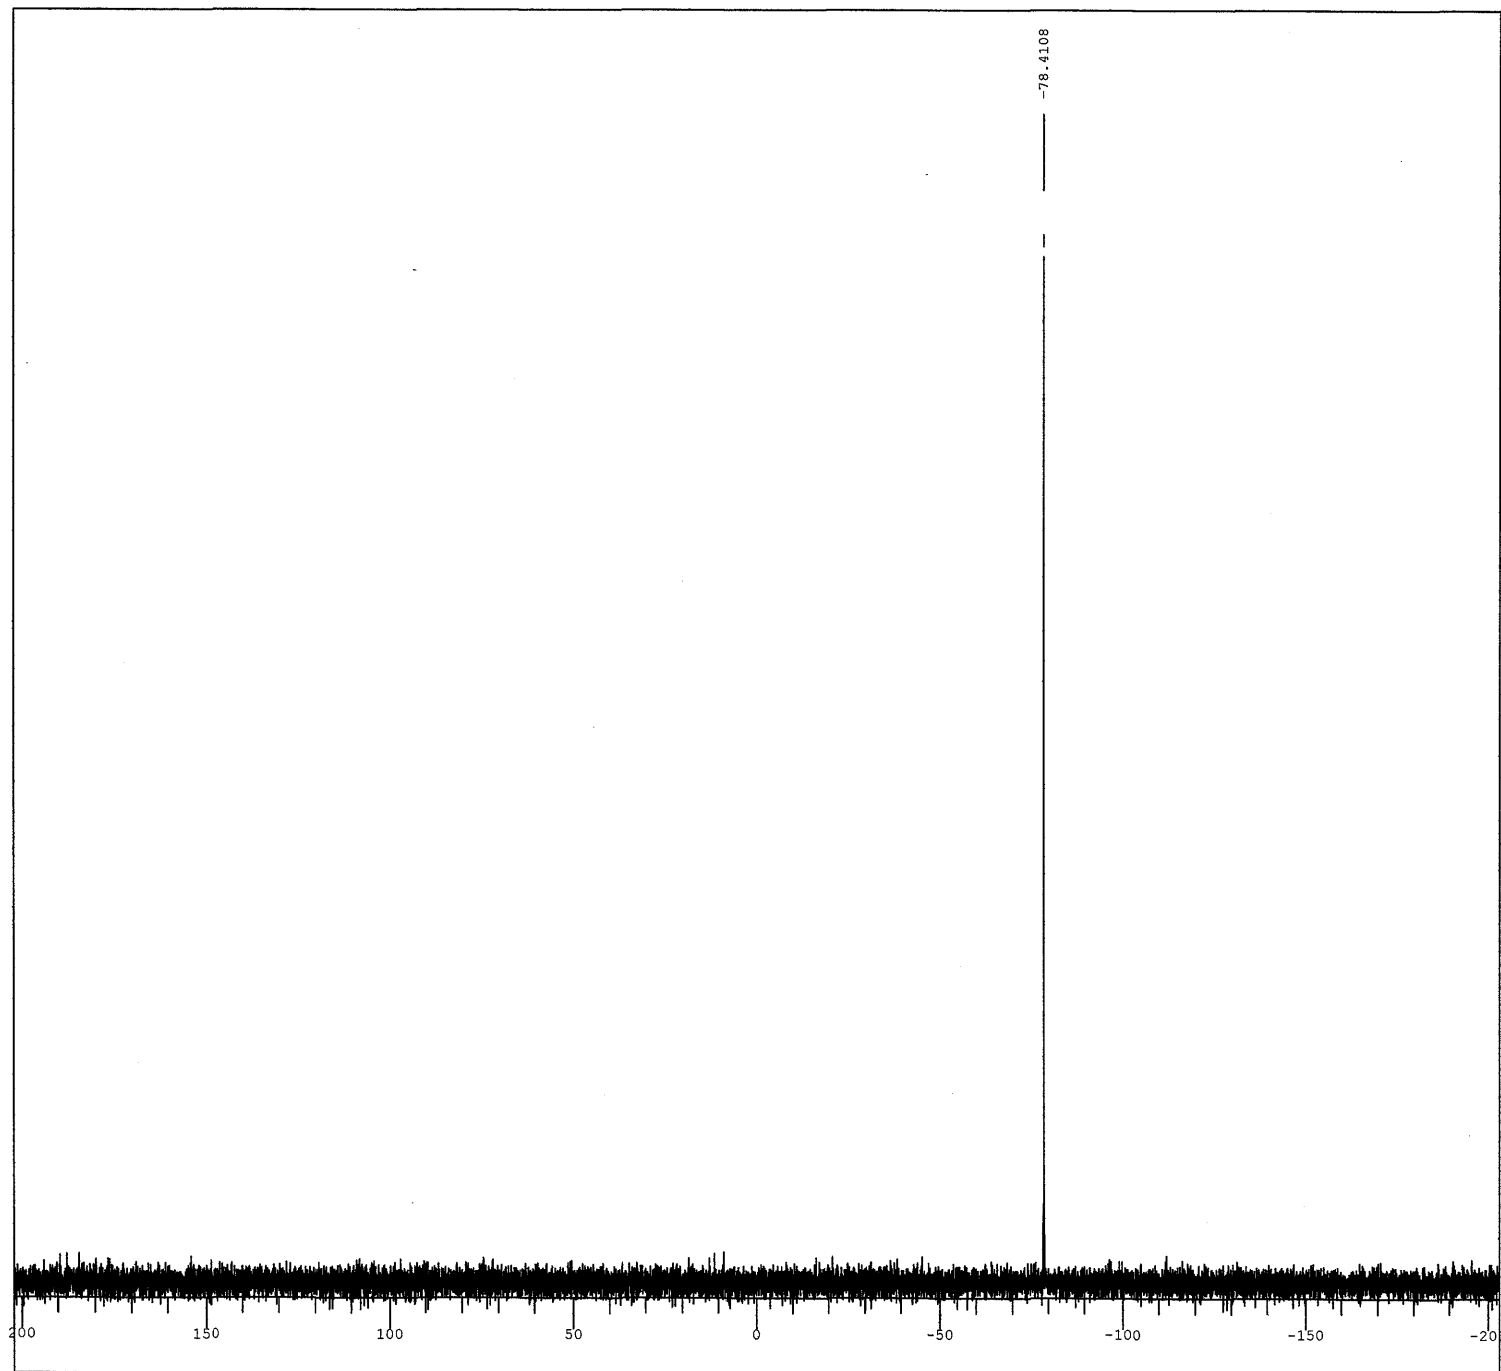

DFILE ozawa05-055\_19F.jdf  
COMNT PhEt, OH  
DATIM 15-08-2014 20:04:41  
OBNUC 19F  
EXMOD proton.jxp  
OBFRQ 368.64 MHz  
OBSET 7.63 KHz  
OBFIN 2.85 Hz  
POINT 16384  
FREQU 186567.17 Hz  
SCANS 4  
ACQTM 0.0878 sec  
PD 5.0000 sec  
FW1 3.90 usec  
IRNUC 19F  
CTEMP 24.5 c  
SLVNT CDCL3  
EXREF -164.90 ppm  
BF 0.12 Hz  
RGAIN 48

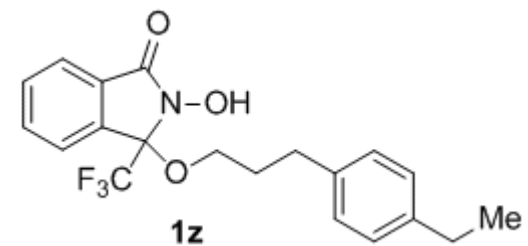

PhEt, [O]

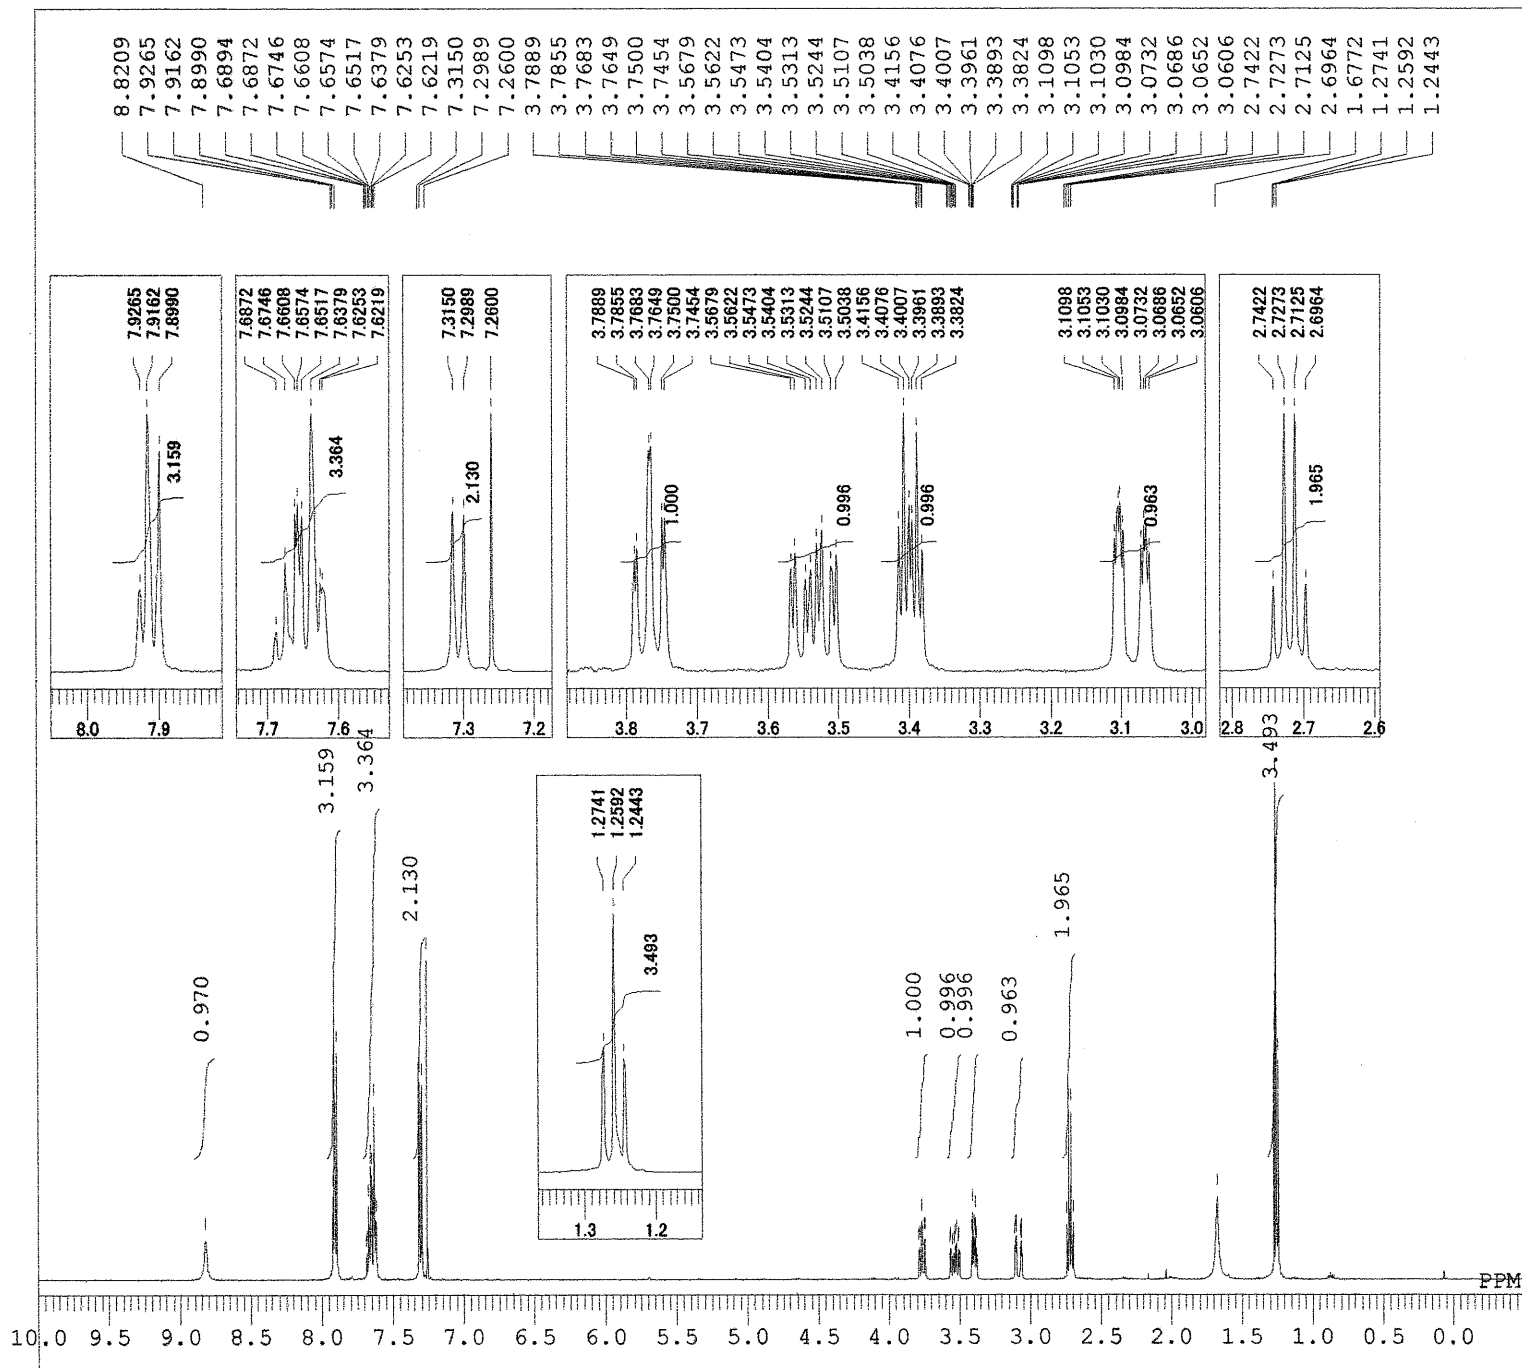

DFILE ozawa05-097\_1H.jdf  
COMNT PhEt, [O]  
DATIM 2014-07-09 22:52:48  
OBNUC 1H  
EXMOD proton.jxp  
OBFRQ 500.16 MHz  
OBSET 2.41 KHz  
OBFIN 6.01 Hz  
POINT 16384  
FREQU 9384.38 Hz  
SCANS 4  
ACQTM 1.7459 sec  
PD 5.0000 sec  
PW1 5.55 usec  
IRNUC 1H  
CTEMP 25.8 c  
SLVNT CDCL3  
EXREF 7.26 ppm  
BF 0.12 Hz  
RGAIN 38

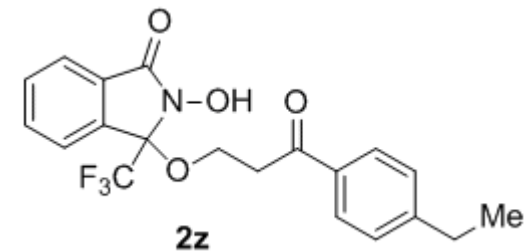

PhEt, [0]

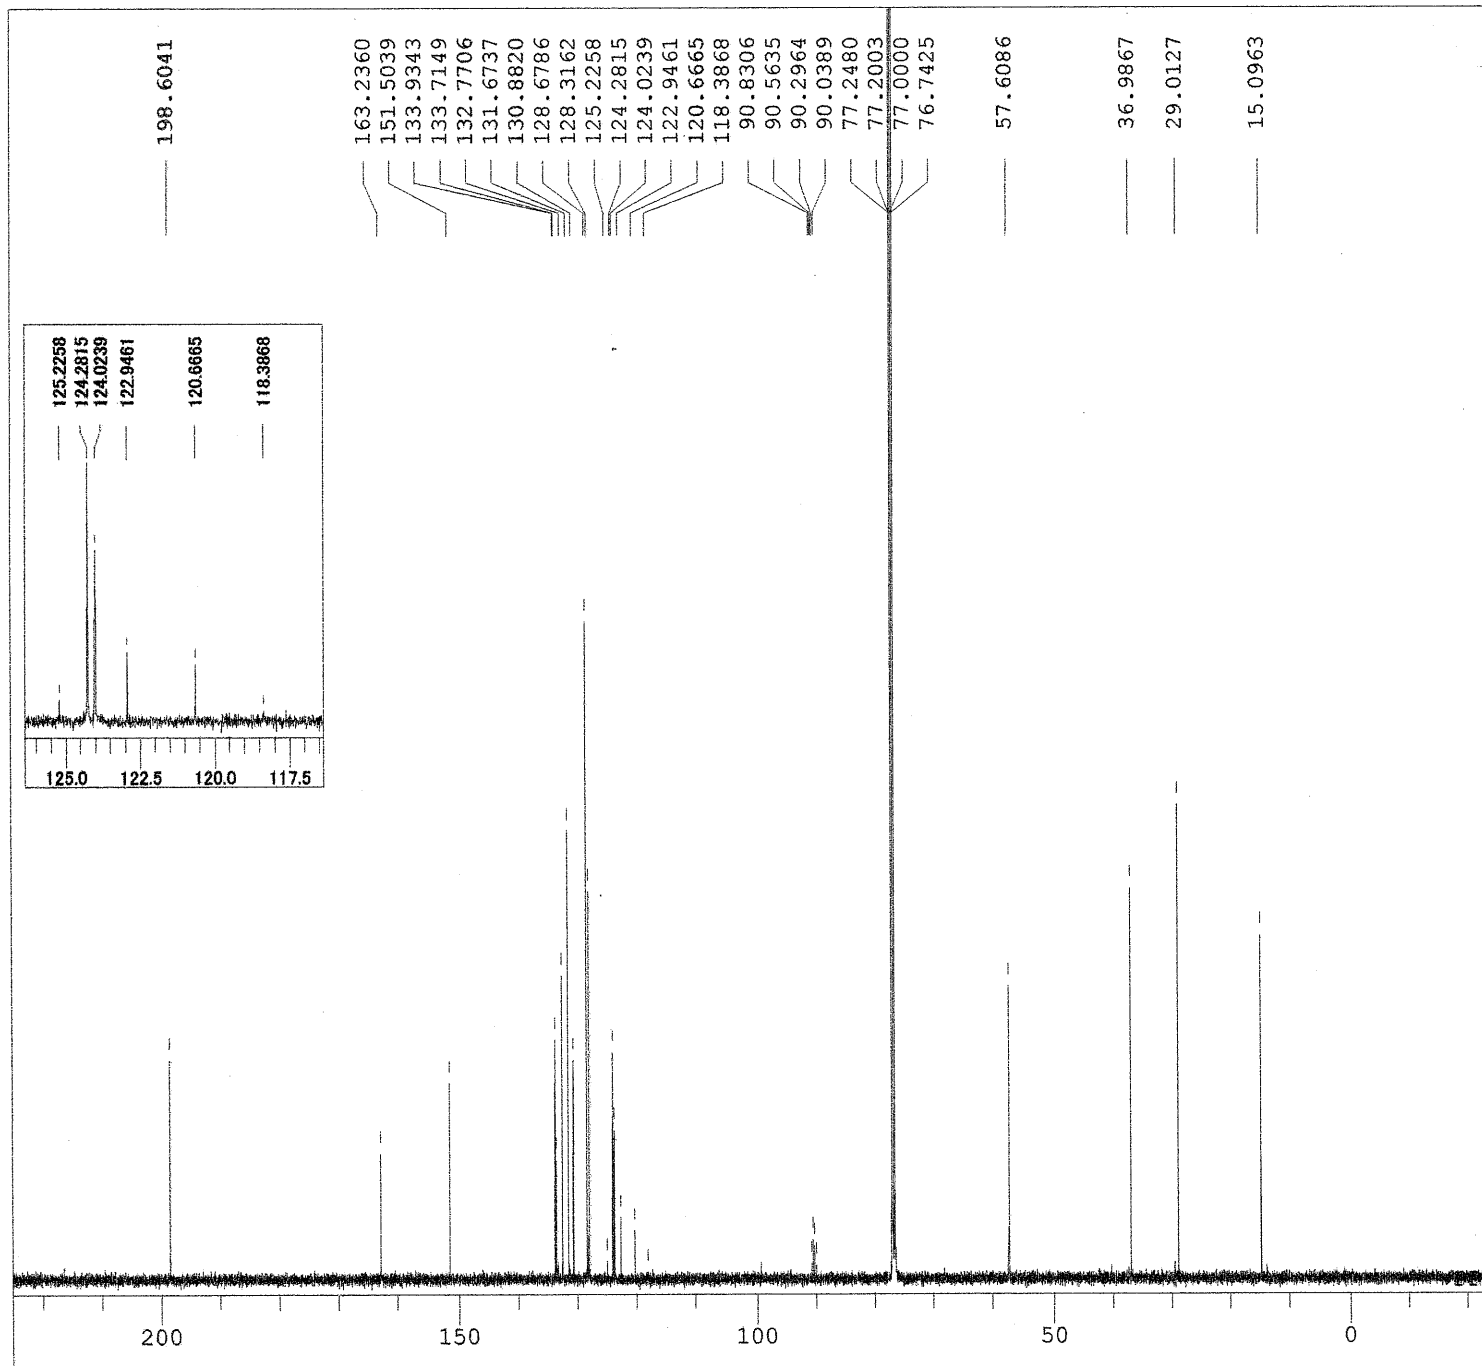

DFILE ozawa05-097\_13C.jdf  
COMNT PhEt, [0]  
DATIM 2014-07-09 22:53:52  
OBNUC 13C  
EXMOD carbon.jxp  
OBFRQ 125.77 MHz  
OBSET 7.87 KHz  
OBFIN 4.21 Hz  
POINT 32767  
FREQU 39308.18 Hz  
SCANS 9400  
ACQTM 0.8336 sec  
PD 3.0000 sec  
PW1 3.40 usec  
IRNUC 1H  
CTEMP 26.0 c  
SLVNT CDCL3  
EXREF 77.00 ppm  
BF 0.12 Hz  
RGAIN 60

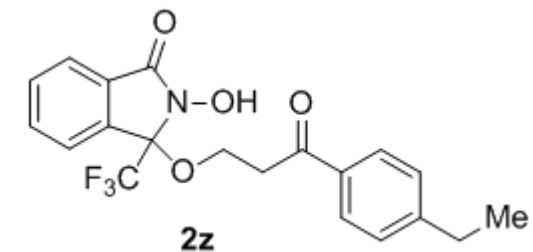

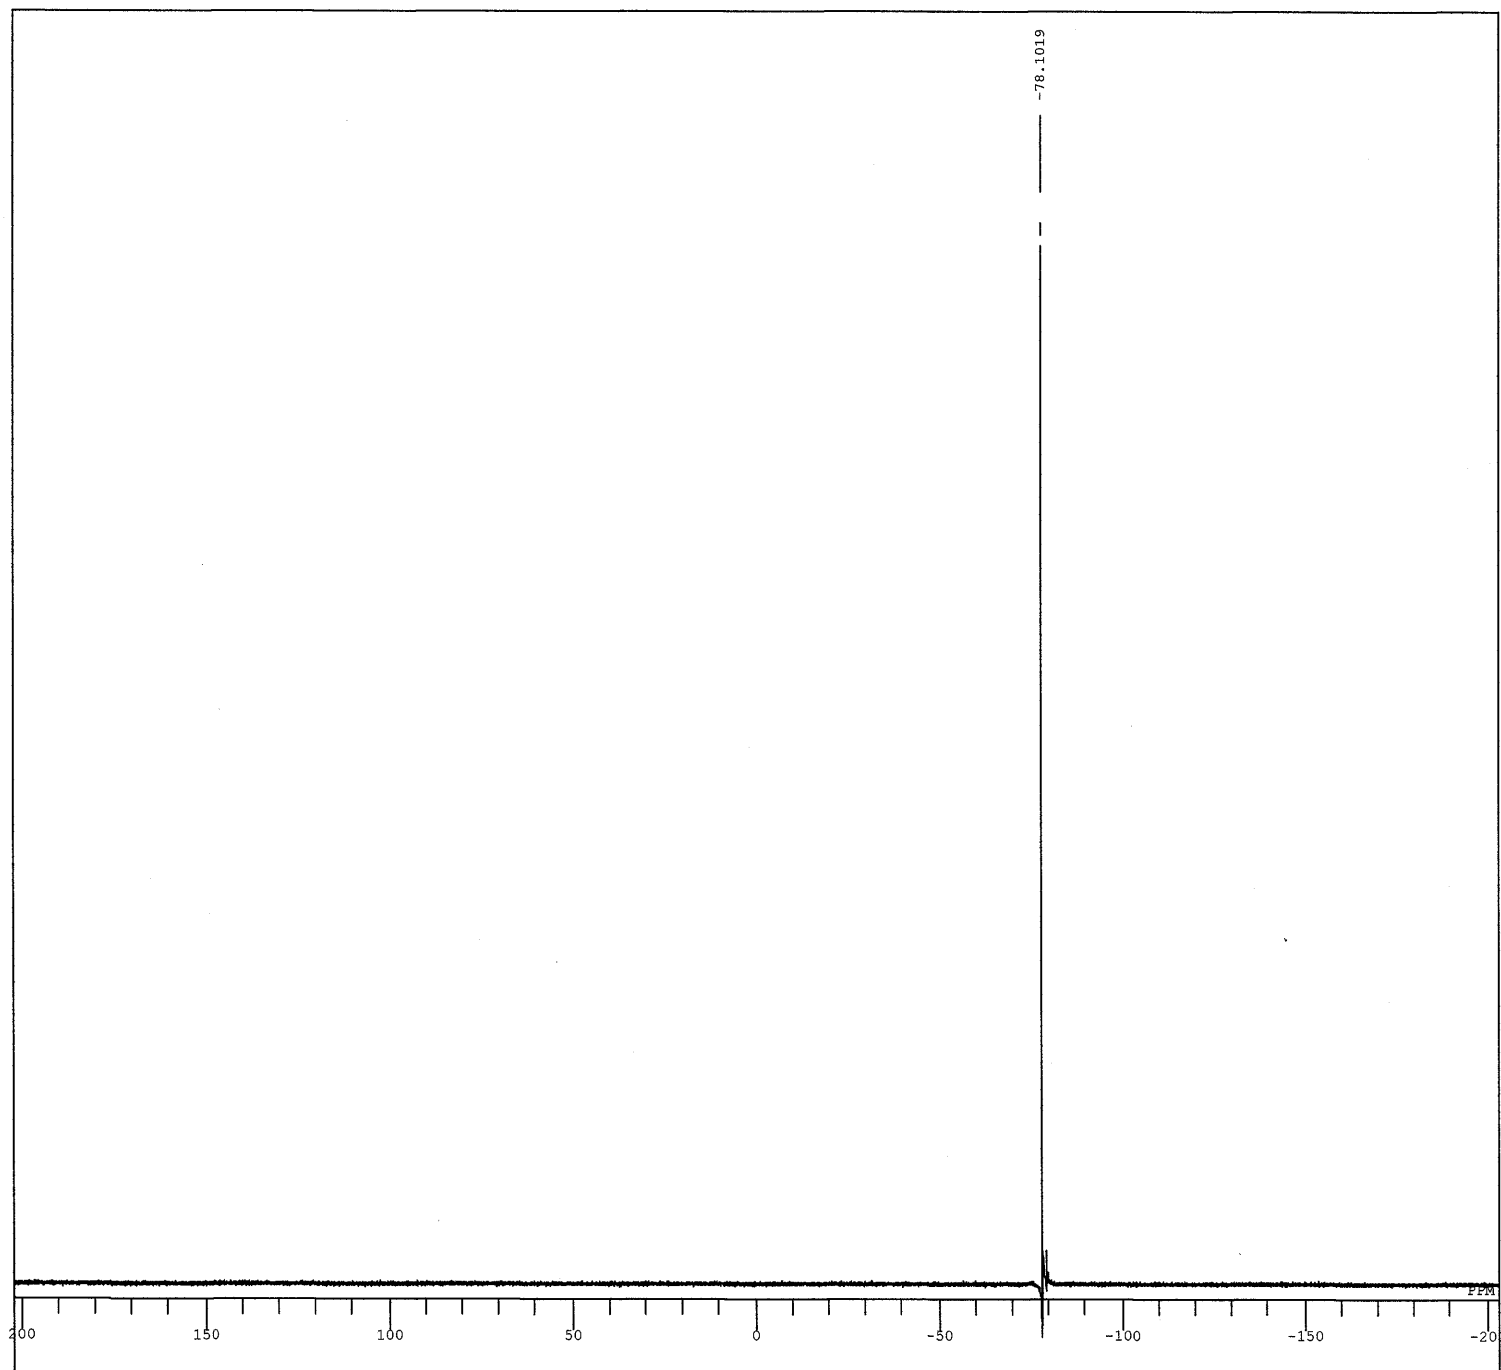

DFILE ozawa05-097\_19F.jdf  
COMNT PhEt, [0]  
DATIM 10-07-2014 14:38:13  
OBNUC 19F  
EXMOD proton.jxp  
OBFRQ 368.64 MHz  
OBSET 7.63 KHz  
OBFIN 2.85 Hz  
POINT 16384  
FREQU 186567.17 Hz  
SCANS 4  
ACQTM 0.0878 sec  
PD 5.0000 sec  
PW1 3.90 usec  
IRNUC 19F  
CTEMP 23.7 c  
SLVNT CDCL3  
EXREF -164.90 ppm  
BF 0.12 Hz  
RGAIN 40

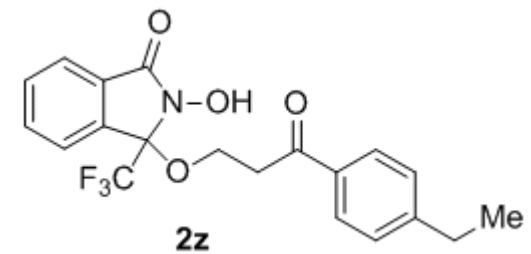



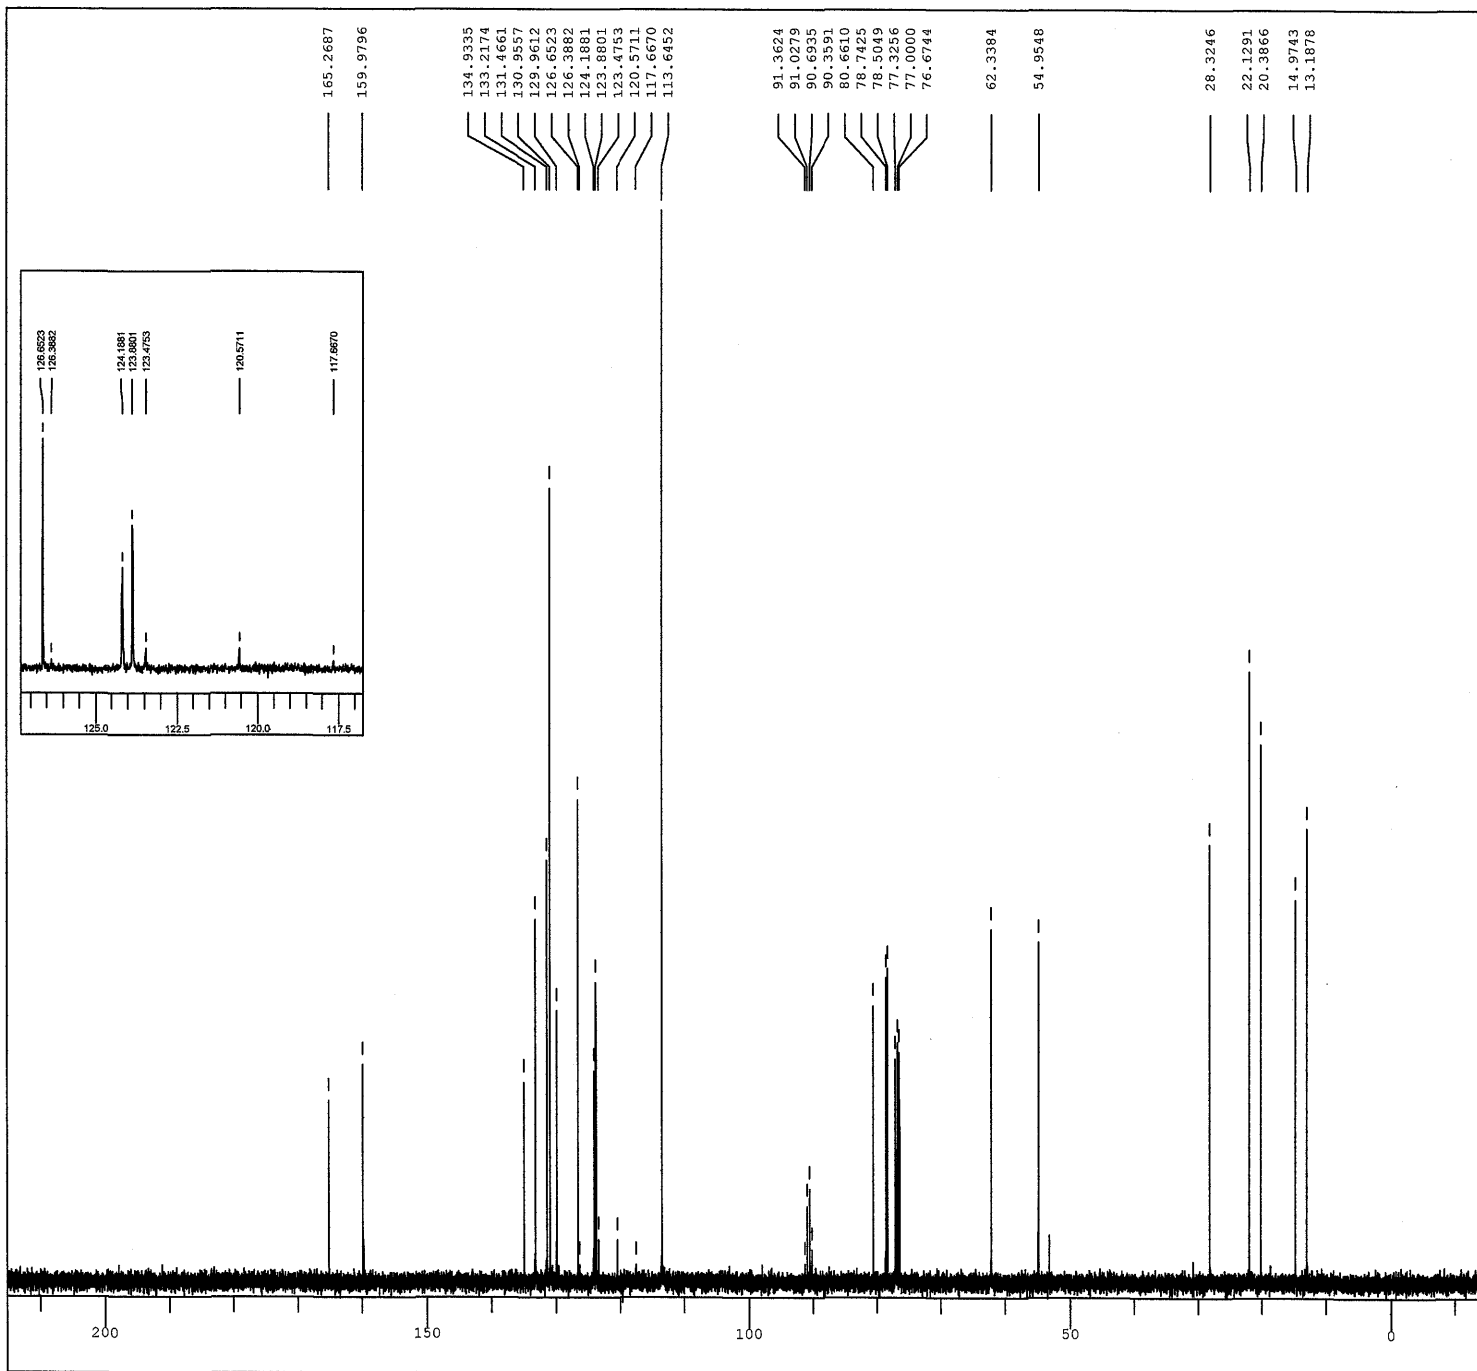

DFILE ozawa05-127\_1\_13c.jdf  
 COMNT nPr-yne, PMB  
 DATIM 11-08-2014 19:30:52  
 OBNUC 13C  
 EXMOD carbon.jxp  
 OBFRO 98.52 MHz  
 OBSET 4.64 KHz  
 OBFIN 8.74 Hz  
 POINT 32767  
 FREQU 28409.09 Hz  
 SCANS 72  
 ACQTM 0.0000 sec  
 PD 3.0000 sec  
 PW1 3.00 usec  
 IRNUC 1H  
 CTEMP 24.3 c  
 SLVNT CDCL3  
 EXREF 77.00 ppm  
 BF 0.12 Hz  
 RGAIN 60

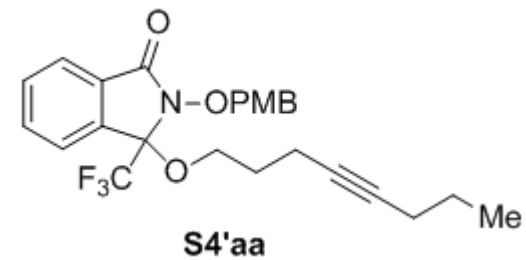

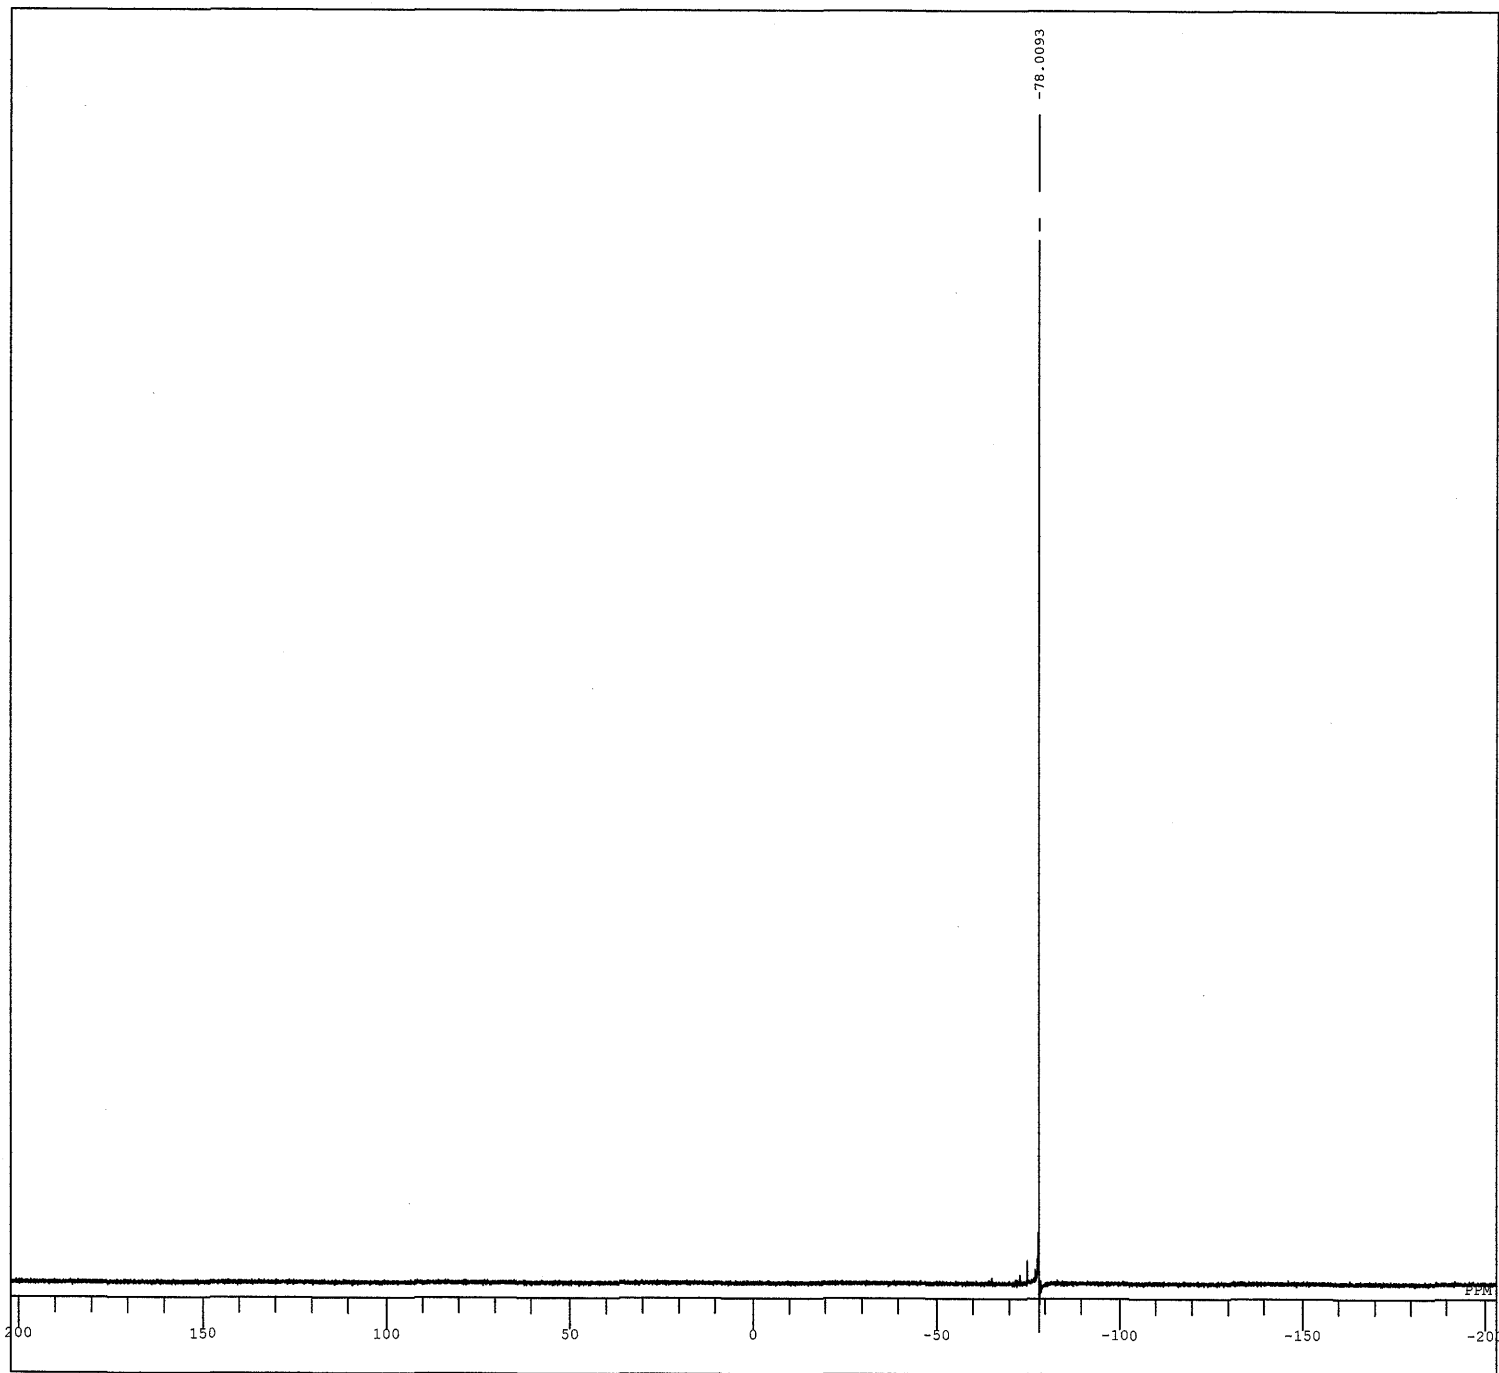

DFILE ozawa05-127\_1\_19F.jdf  
COMNT nPr-yne, PMB  
DATIM 11-08-2014 20:18:02  
OBNUC 19F  
EXMOD proton.jxp  
OBFRQ 368.64 MHz  
OBSET 7.63 KHz  
OBFIN 2.85 Hz  
POINT 16384  
FREQU 186567.17 Hz  
SCANS 4  
ACQTM 0.0878 sec  
PD 5.0000 sec  
FW1 3.90 usec  
IRNUC 19F  
CTEMP 24.1 c  
SLVNT CDCL3  
EXREF -164.90 ppm  
BF 0.12 Hz  
RGAIN 50

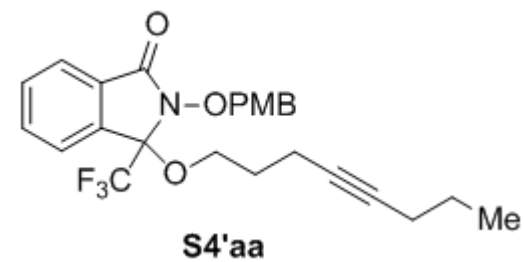

nPr-yne, OH

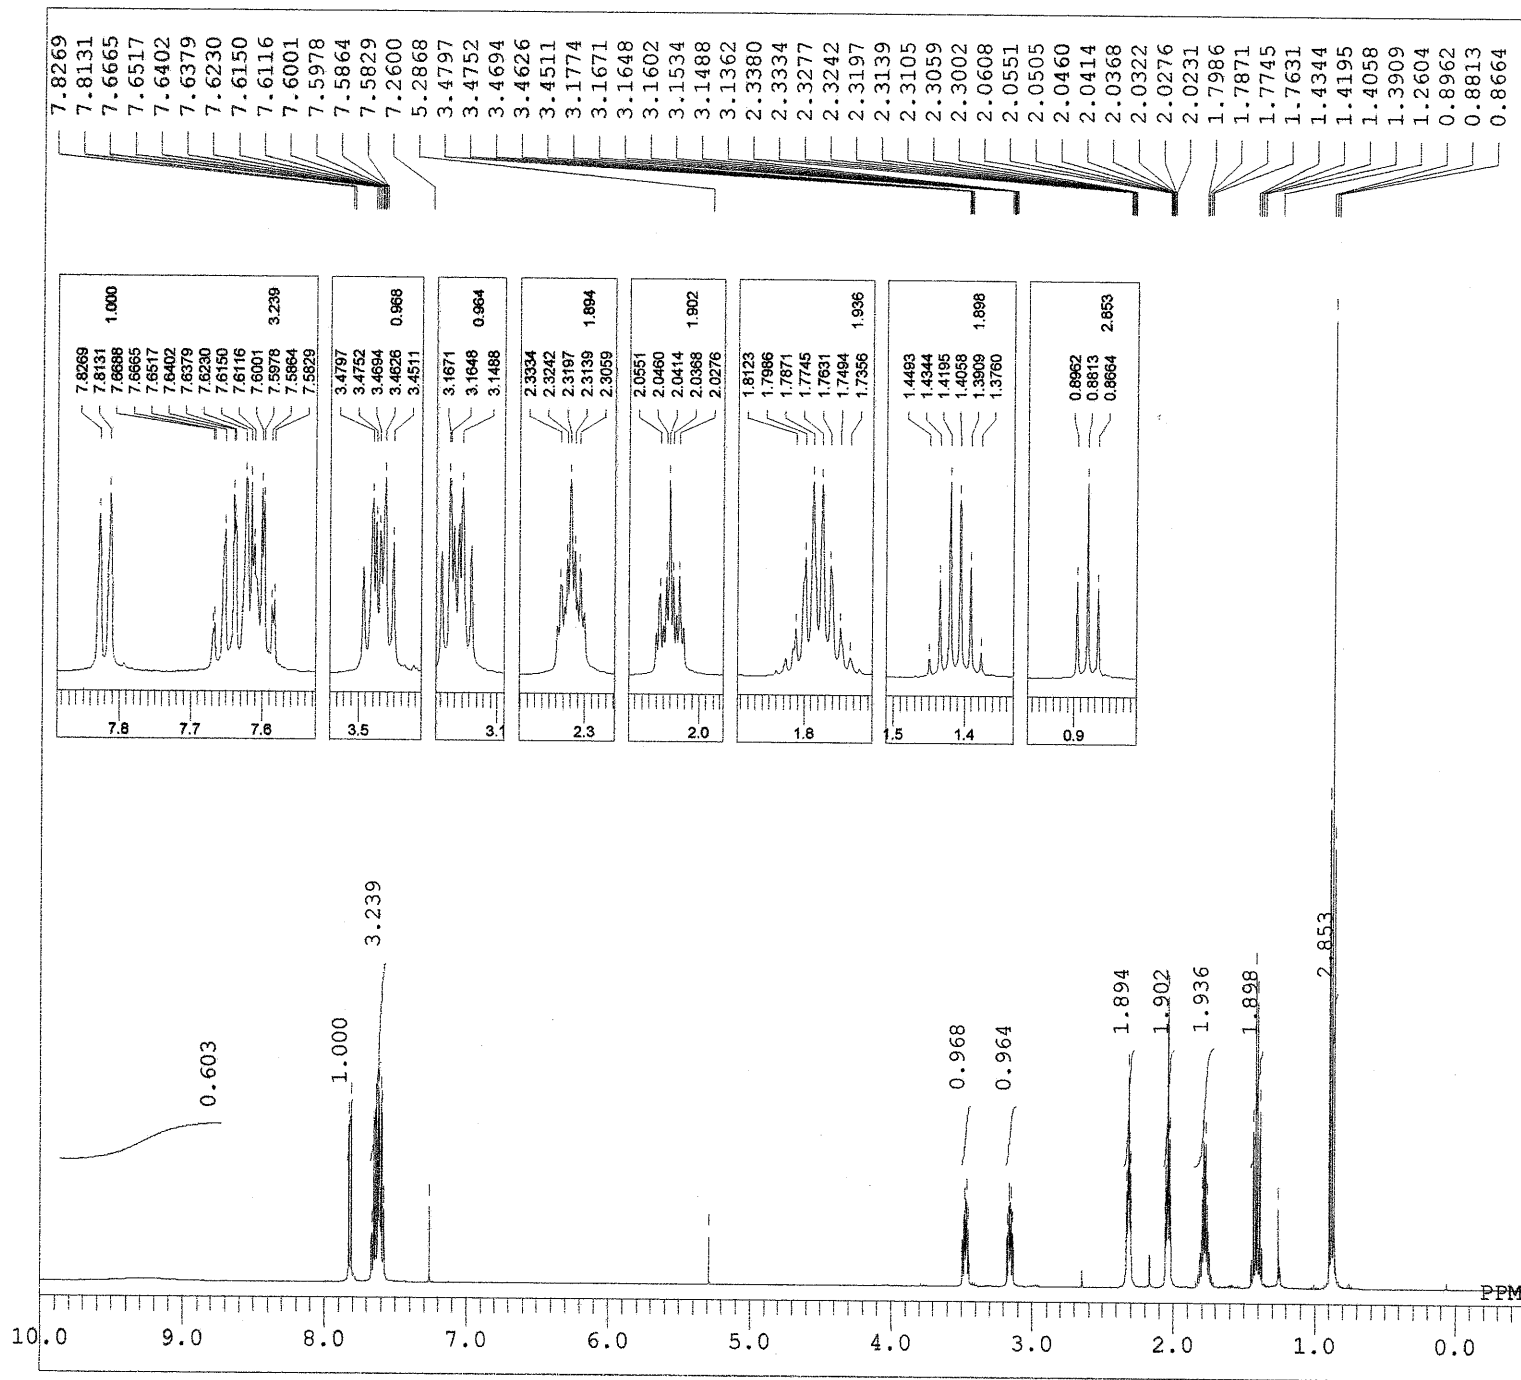

DFILE ozawa05-129\_1\_1H.jdf  
COMNT nPr-yne, OH  
DATIM 2014-08-15 18:45:04  
OBNUC 1H  
EXMOD proton.jxp  
OBFRQ 500.16 MHz  
OBSET 2.41 KHz  
OBFIN 6.01 Hz  
POINT 16384  
FREQU 9384.38 Hz  
SCANS 4  
ACQTM 1.7459 sec  
PD 5.0000 sec  
PW1 5.55 usec  
IRNUC 1H  
CTEMP 26.3 c  
SLVNT CDCL3  
EXREF 7.26 ppm  
BF 0.12 Hz  
RGAIN 30

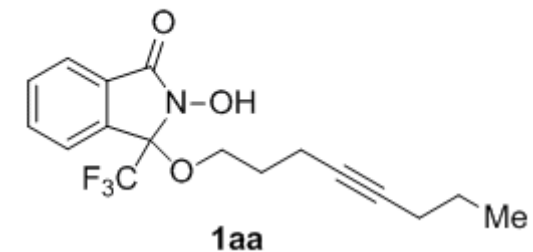



nPr-yne, OH

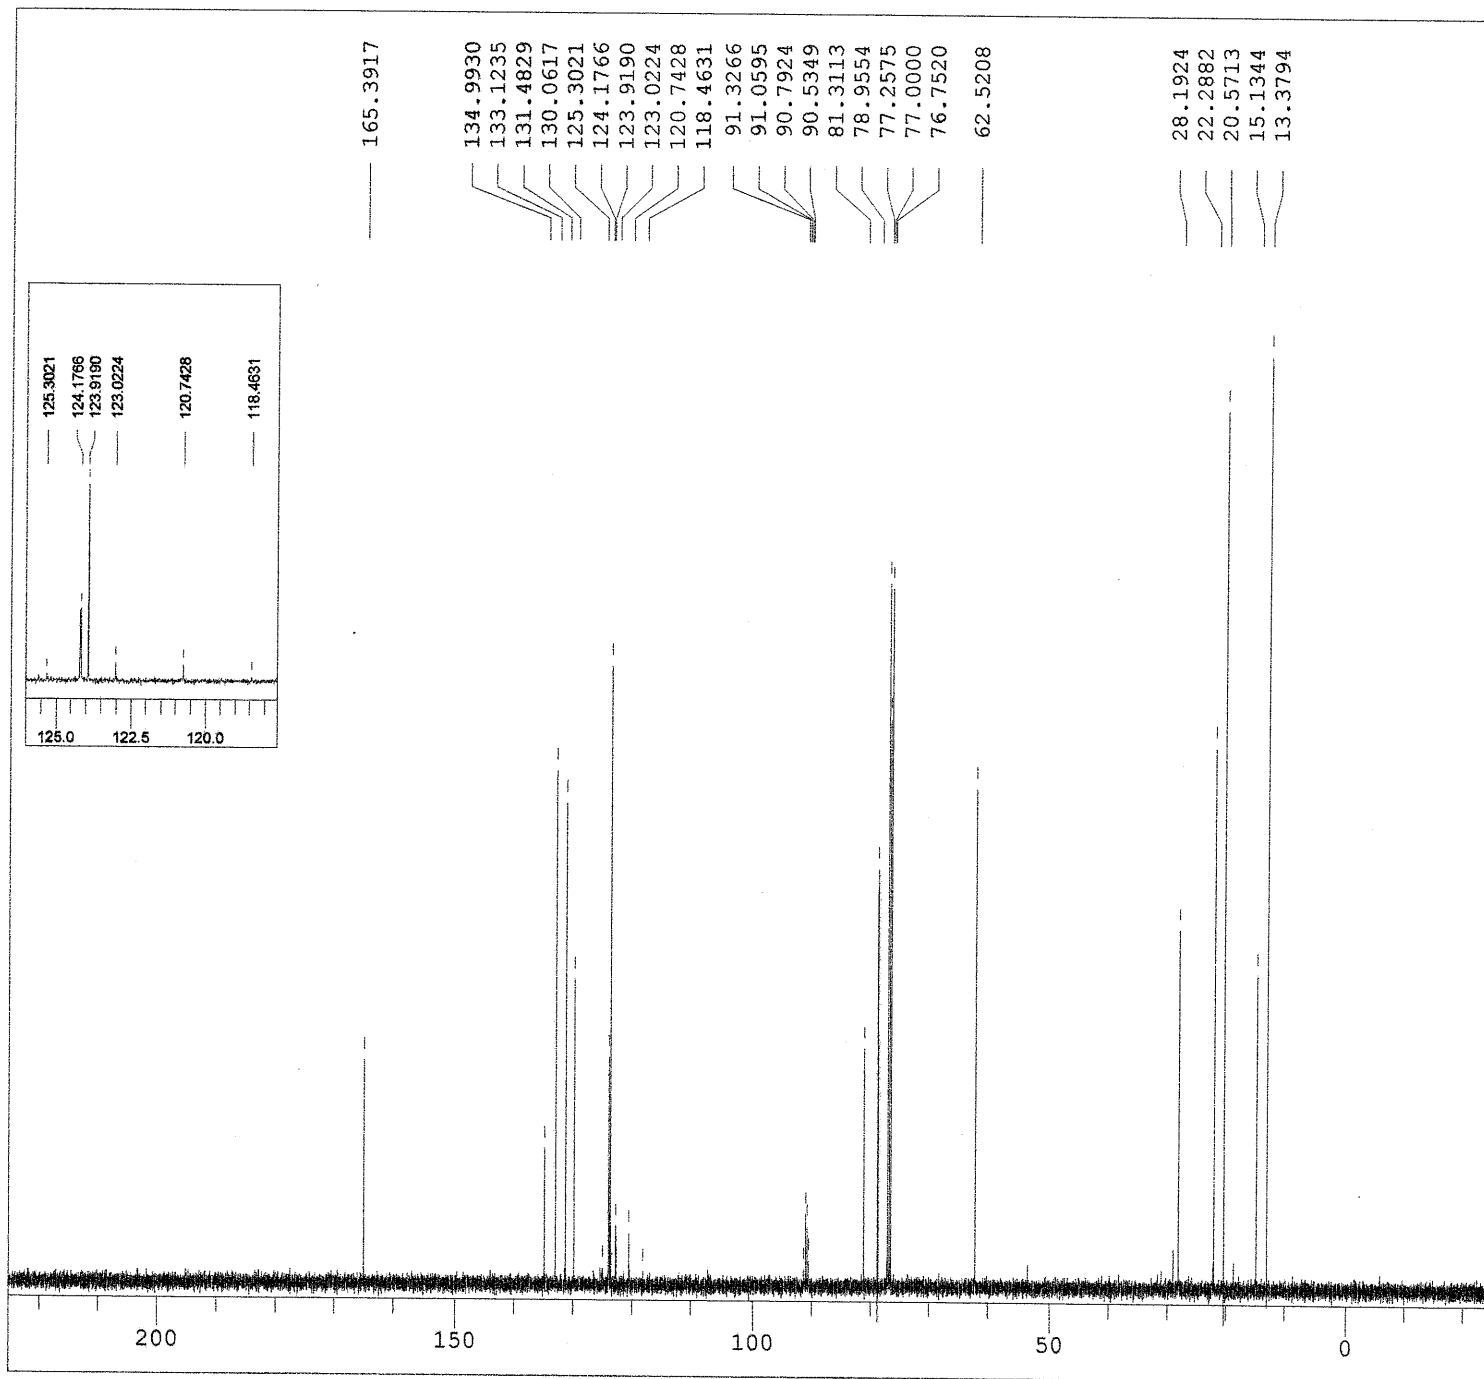

DFILE ozawa05-129\_1\_13C.jdf  
COMNT nPr-yne, OH  
DATIM 2014-08-15 18:46:07  
OBNUC 13C  
EXMOD carbon.jxp  
OBFRQ 125.77 MHz  
OBSET 7.87 KHz  
OBFIN 4.21 Hz  
POINT 32767  
FREQU 39308.18 Hz  
SCANS 200  
ACQTM 0.8336 sec  
PD 3.0000 sec  
PW1 3.40 usec  
IRNUC 1H  
CTEMP 26.6 c  
SLVNT CDCL3  
EXREF 77.00 ppm  
BF 0.12 Hz  
RGAIN 60

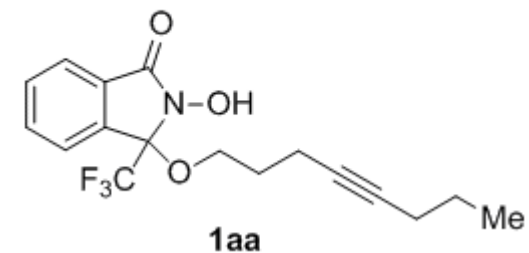

nPr-yne, OH

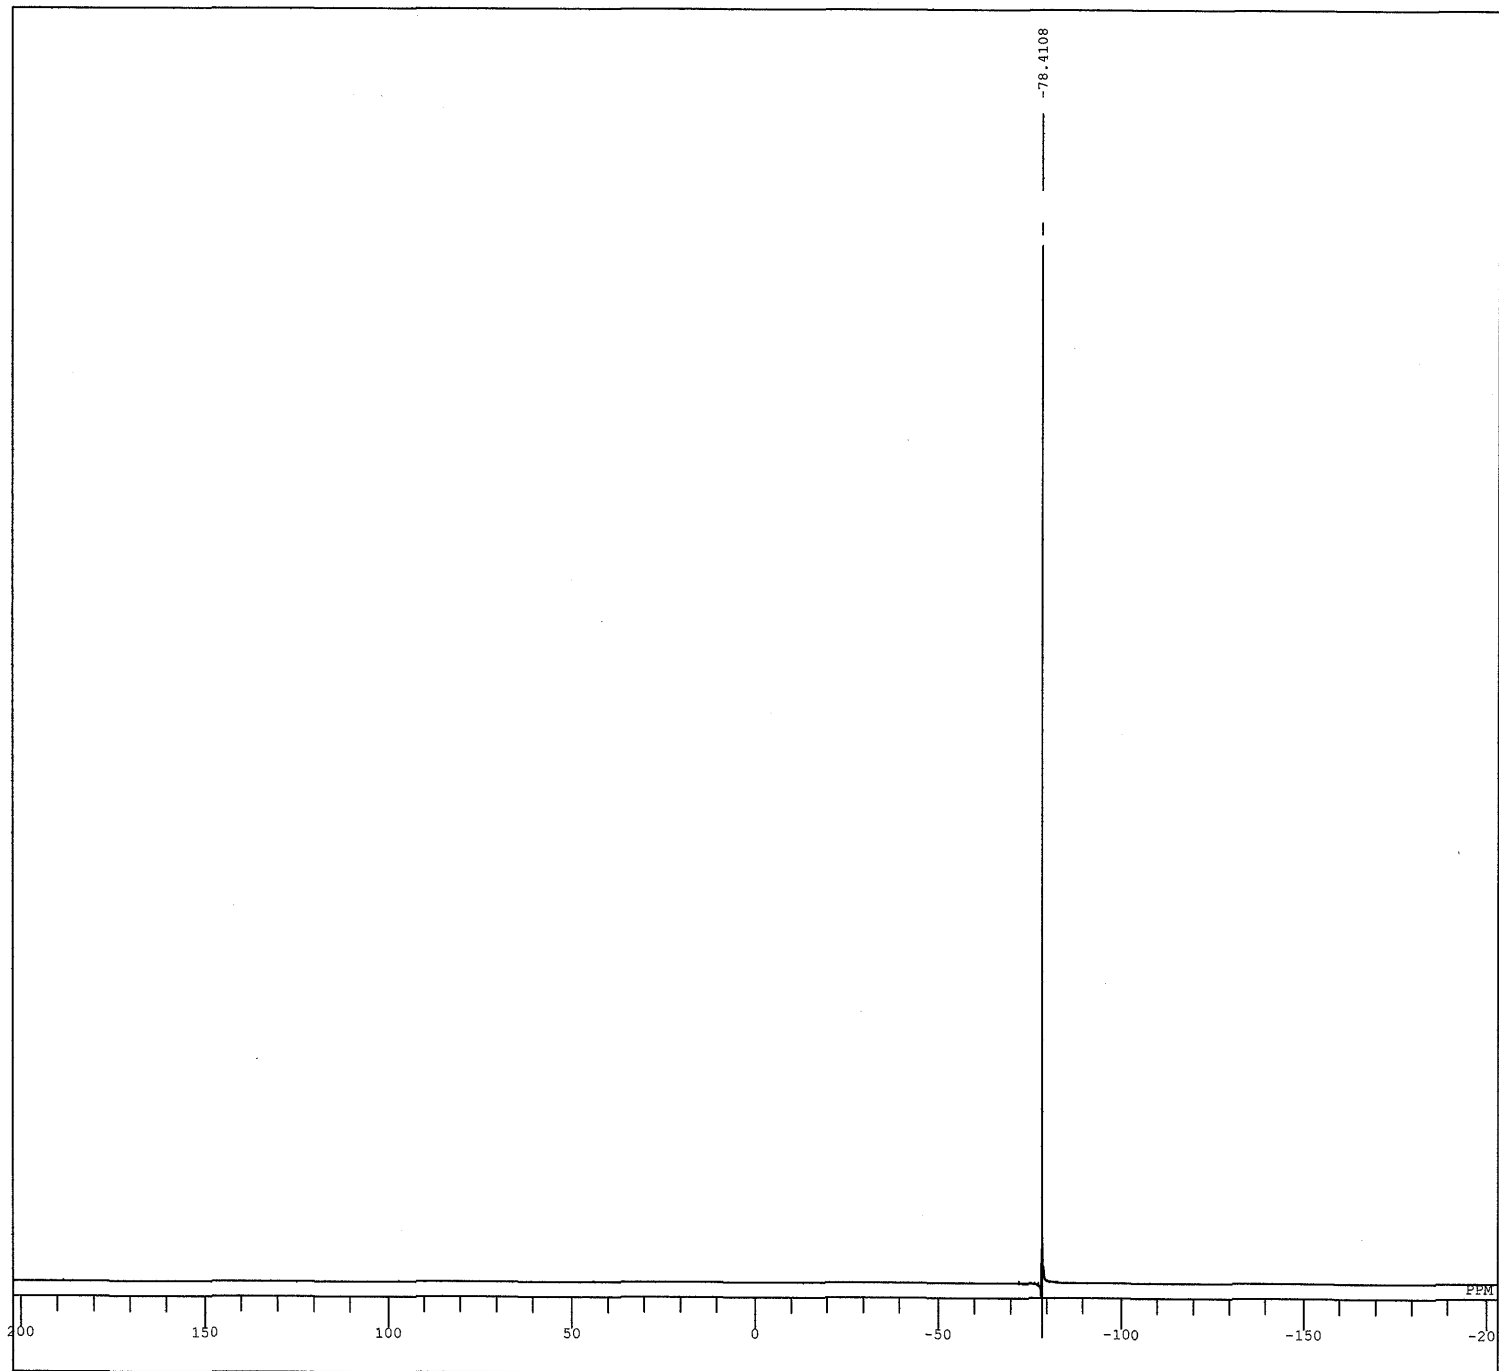

DFILE ozawa05-129\_1\_19F.jdf  
COMNT nPr-yne, OH  
DATIM 15-08-2014 19:57:17  
OBNUC 19F  
EXMOD proton.jxp  
OBFRQ 368.64 MHz  
OBSEF 7.63 KHz  
OBFIN 2.85 Hz  
POINT 16384  
FREQU 186567.17 Hz  
SCANS 4  
ACQTM 0.0878 sec  
PD 5.0000 sec  
PW1 3.90 usec  
IRNUC 19F  
CTEMP 24.5 c  
SLVNT CDCL3  
EXREF -164.90 ppm  
BF 0.12 Hz  
RGAIN 44

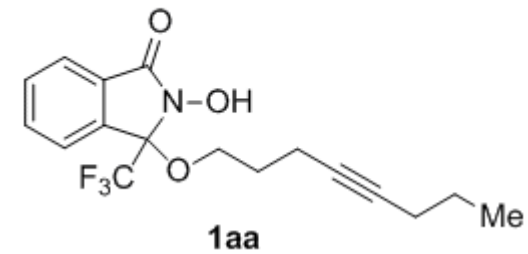

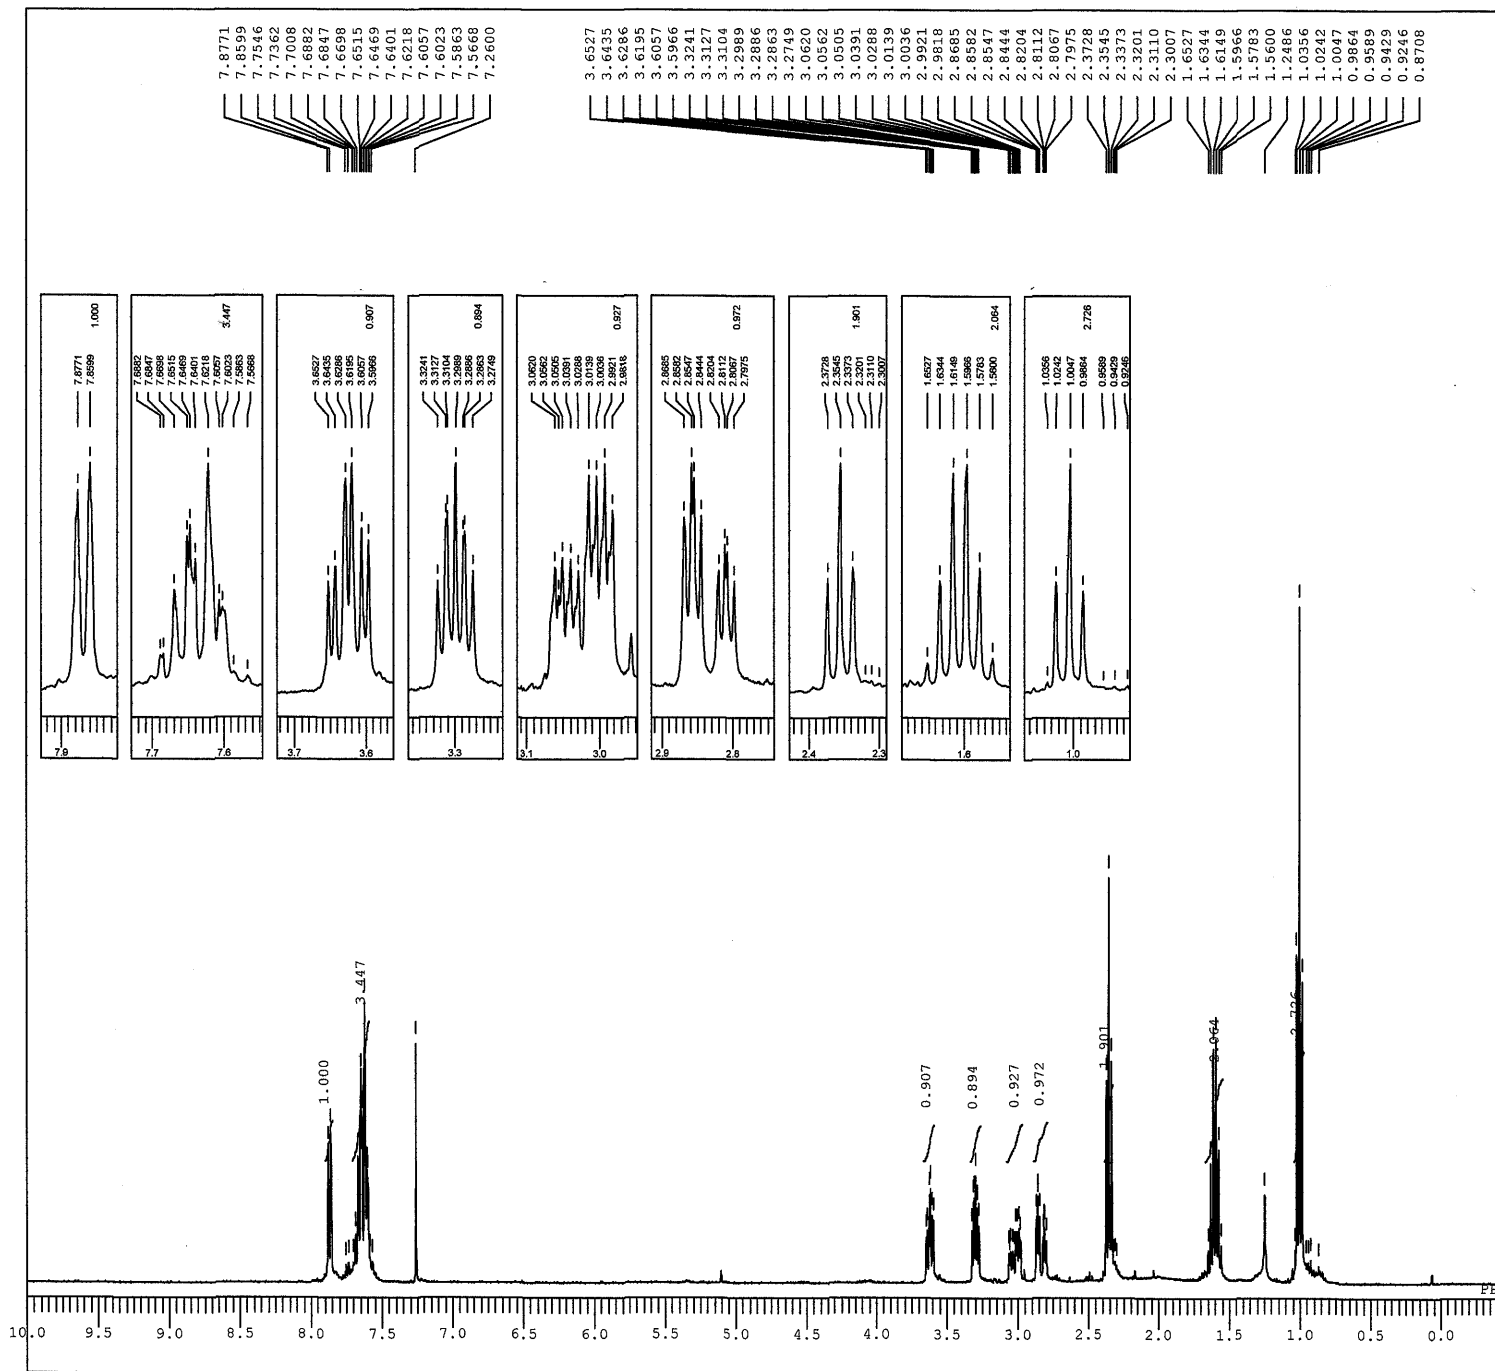

DFILE ozawa05-134\_3\_1H.jdf  
 COMNT nPr-yne, [0]  
 DATIM 14-08-2014 23:08:23  
 OBNUC 1H  
 EXMOD proton.jxp  
 OBFREQ 391.78 MHz  
 OBSETE 8.51 KHz  
 OBFIN 3.34 Hz  
 POINT 16384  
 FREQU 7348.62 Hz  
 SCANS 4  
 ACQTM 2.2295 sec  
 PD 5.0000 sec  
 PW1 5.25 usec  
 IRNUC 1H  
 CTEMP 24.1 c  
 SLVNT CDCL3  
 EXREF 7.26 ppm  
 BF 0.12 Hz  
 RGAIN 38

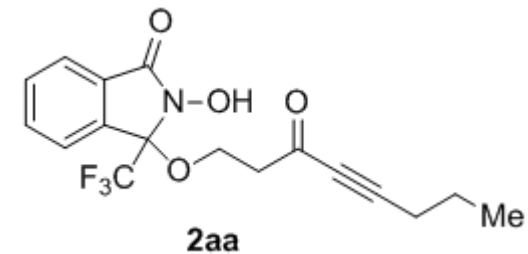

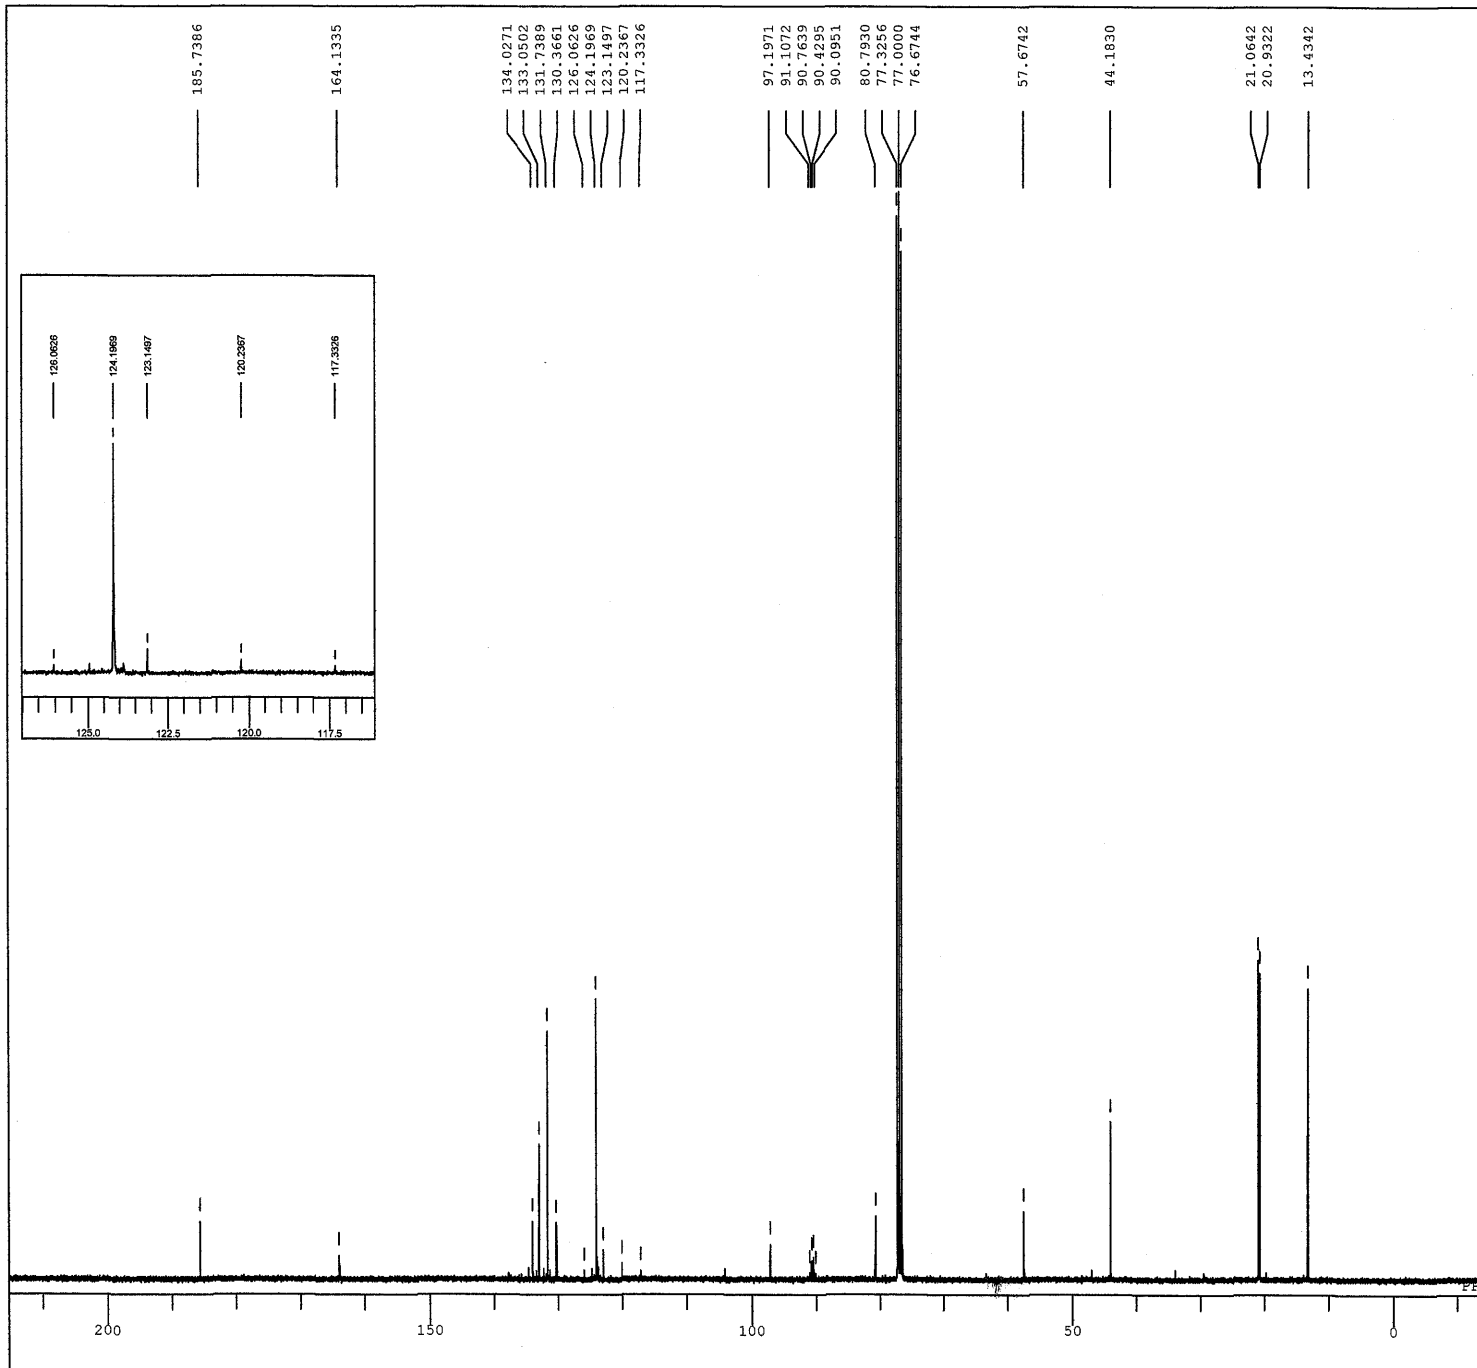

DFILE ozawa05-134\_3\_13c.jdf  
 COMNT nPr-yne, [0]  
 DATIM 14-08-2014 23:09:30  
 OBNUC 13C  
 EXMOD carbon.jxp  
 OBFREQ 98.52 MHz  
 OBSETE 4.64 KHz  
 OBFIN 8.74 Hz  
 POINT 32767  
 FREQU 28409.09 Hz  
 SCANS 9000  
 ACQTM 1.1534 sec  
 PD 3.0000 sec  
 PW1 3.00 usec  
 IRNUC 1H  
 CTEMP 23.9 c  
 SLVNT CDCL3  
 EXREF 77.00 ppm  
 BF 0.12 Hz  
 RGAIN 60

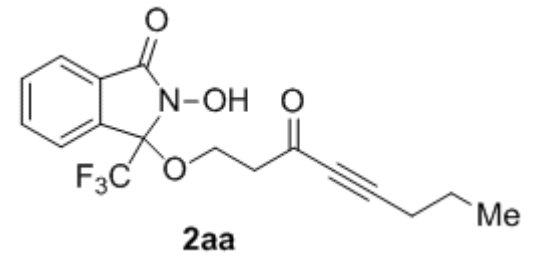

nPr-yne, [0]

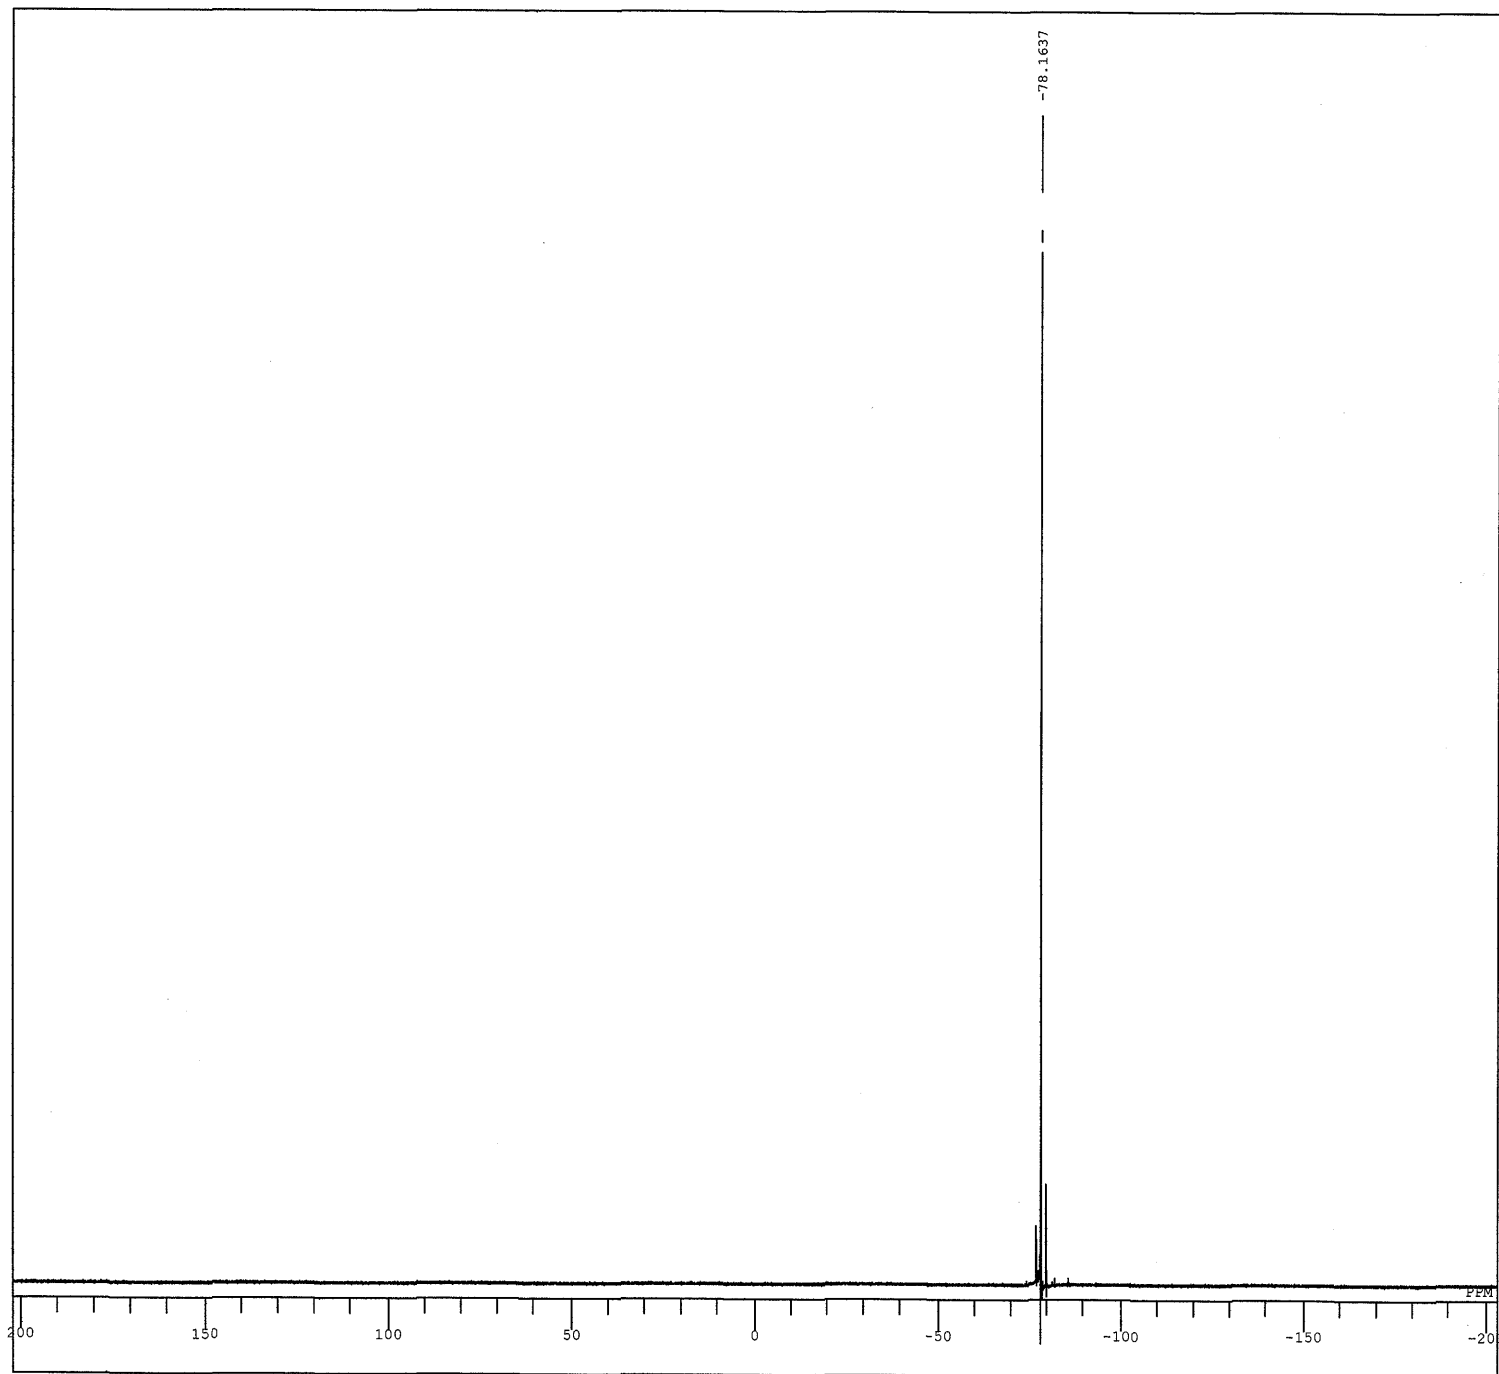

DFILE ozawa05-134\_3\_19F.jdf  
COMNT nPr-yne, [0]  
DATIM 15-08-2014 13:52:07  
OBNUC 19F  
EXMOD proton.jxp  
OBFRQ 368.64 MHz  
OBSET 7.63 KHz  
OBFIN 2.85 Hz  
POINT 16384  
FREQU 186567.17 Hz  
SCANS 4  
ACQTM 0.0878 sec  
PD 5.0000 sec  
PWL 3.90 usec  
IRNUC 19F  
CTEMP 24.2 c  
SLVNT CDCL3  
EXREF -164.90 ppm  
BF 0.12 Hz  
RGAIN 50

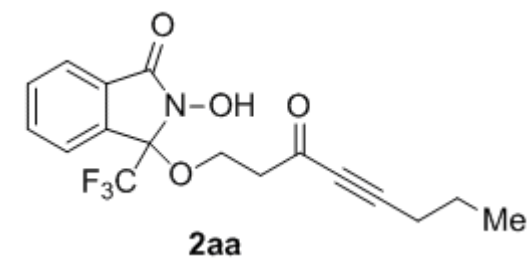

tBu-yne, PMB

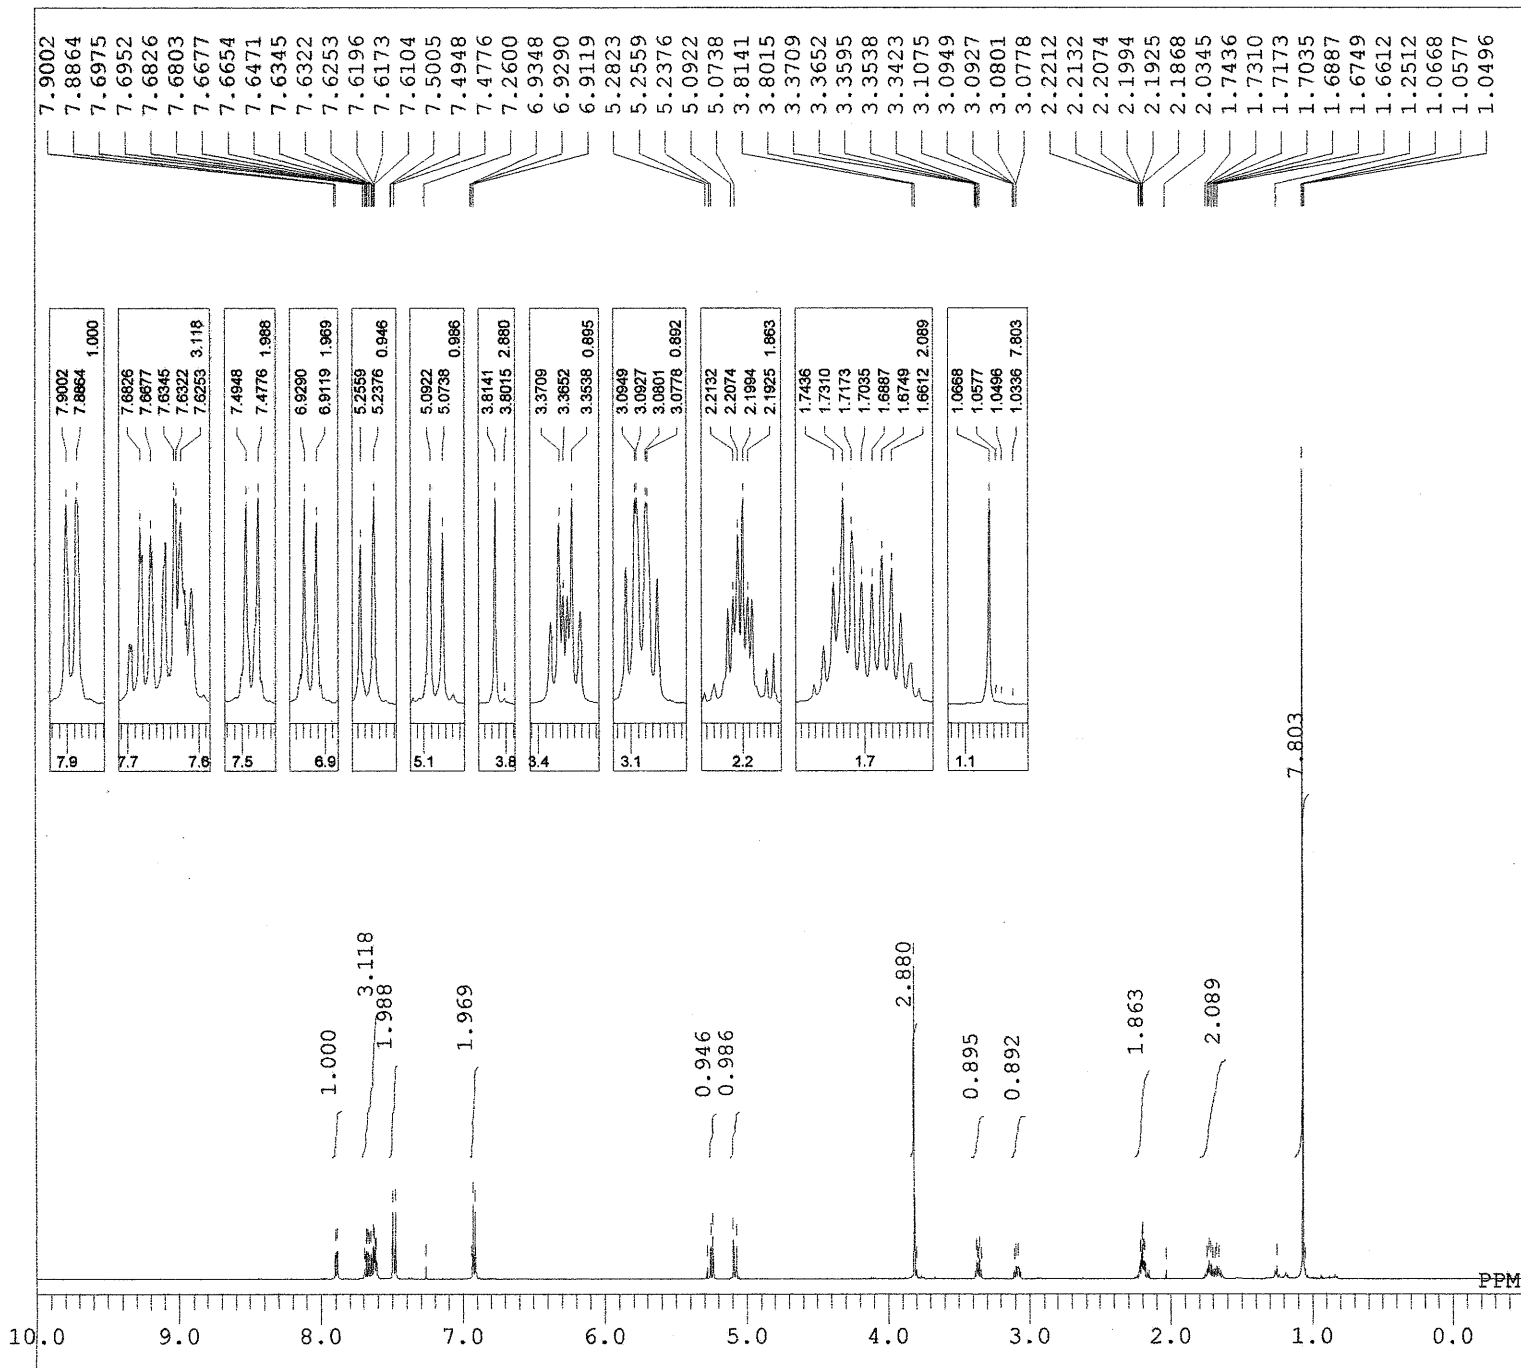

DFILE ozawa05-125\_2\_1H.jdf  
COMNT tBu-yne, PMB  
DATIM 2014-08-07 15:21:25  
OBNUC 1H  
EXMOC proton.jxp  
OBFRQ 500.16 MHz  
OBSET 2.41 KHz  
OBFIN 6.01 Hz  
POINT 16384  
FREQU 9384.38 Hz  
SCANS 4  
ACQTM 1.7459 sec  
PD 5.0000 sec  
PW1 5.55 usec  
IRNUC 1H  
CTEMP 26.6 c  
SLVNT CDCL3  
EXREF 7.26 ppm  
BF 0.12 Hz  
RGAIN 28

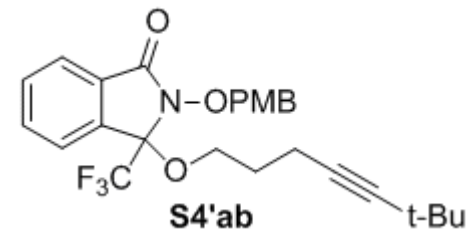

tBu-yne, PMB

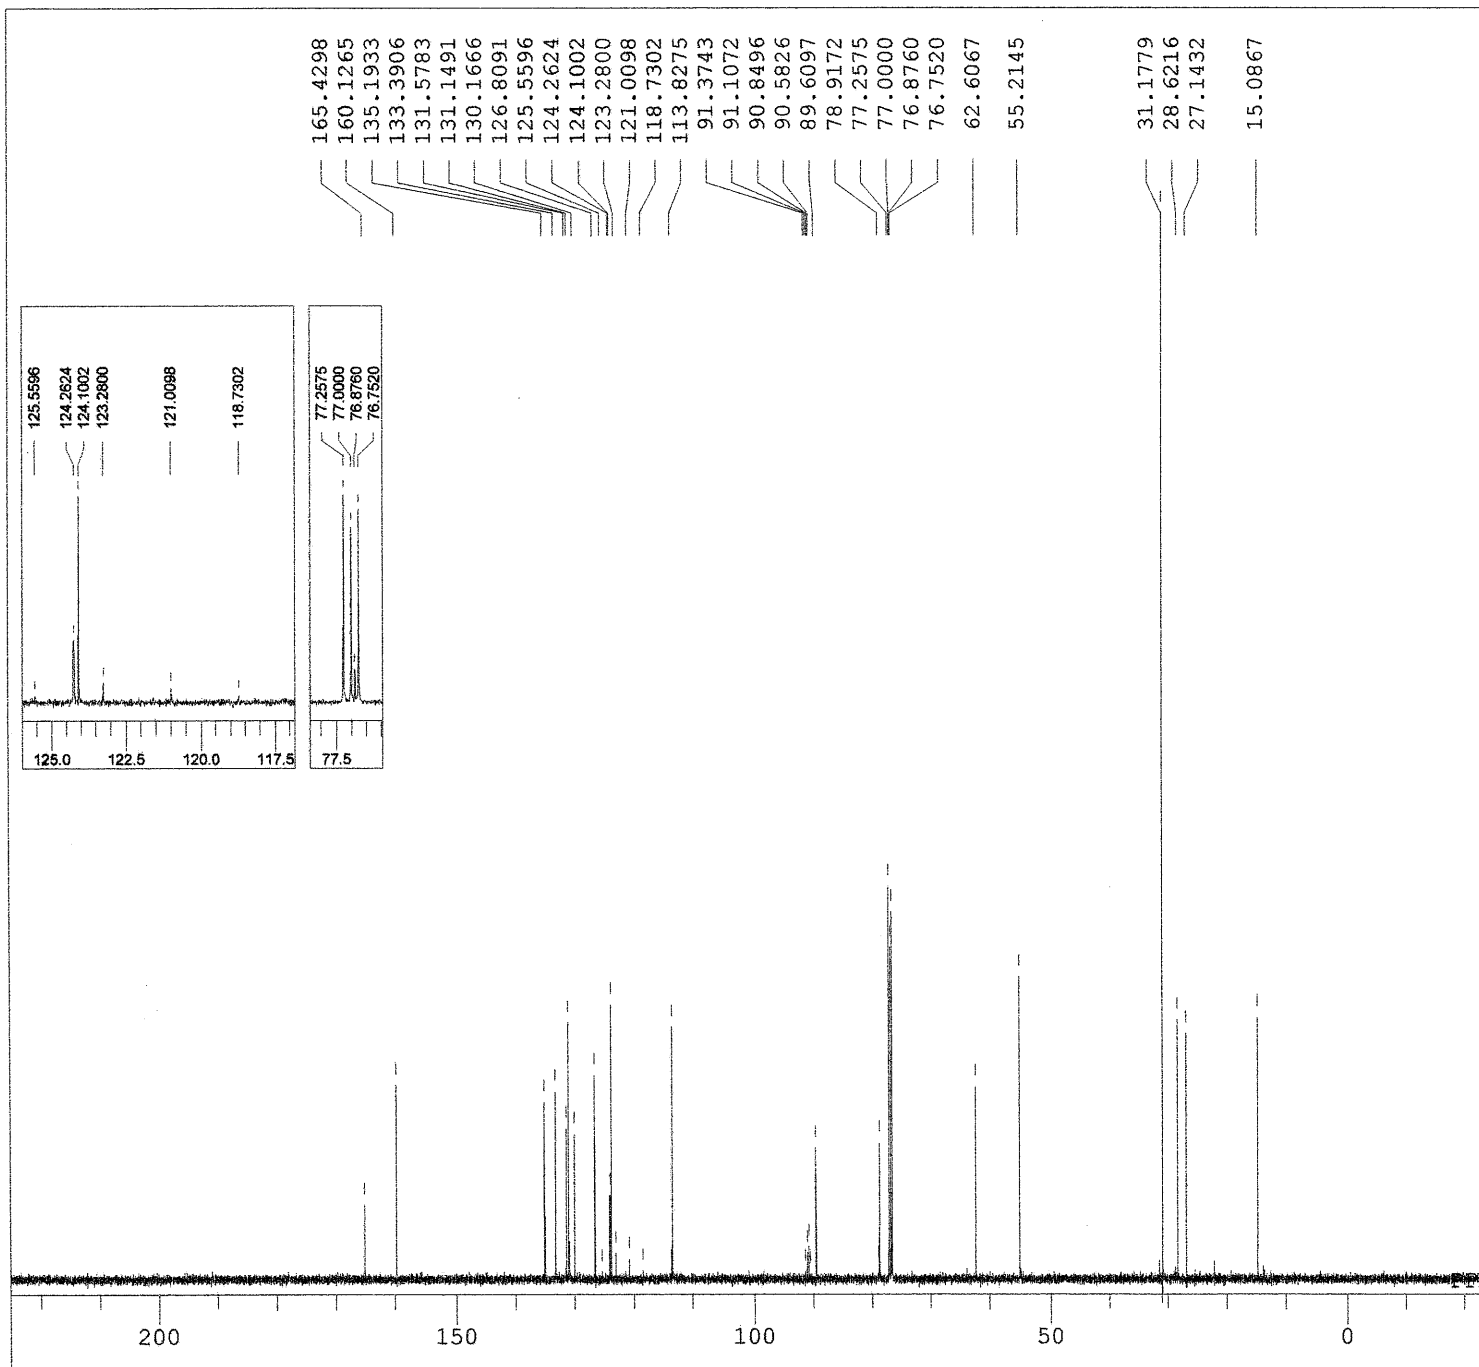

DFILE ozawa05-125\_2\_13C.jdf  
COMNT tBu-yne, PMB  
DATIM 2014-08-07 15:22:39  
OBNUC 13C  
EXMOD carbon.jxp  
OBFRQ 125.77 MHz  
OBSET 7.87 KHz  
OBFIN 4.21 Hz  
POINT 32767  
FREQU 39308.18 Hz  
SCANS 200  
ACQTM 0.8336 sec  
PD 3.0000 sec  
PW1 3.40 usec  
IRNUC 1H  
CTEMP 27.2 c  
SLVNT CDCL3  
EXREF 77.00 ppm  
BF 0.12 Hz  
RGAIN 60

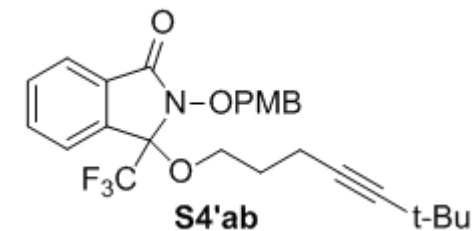

tBu-yne, PMB

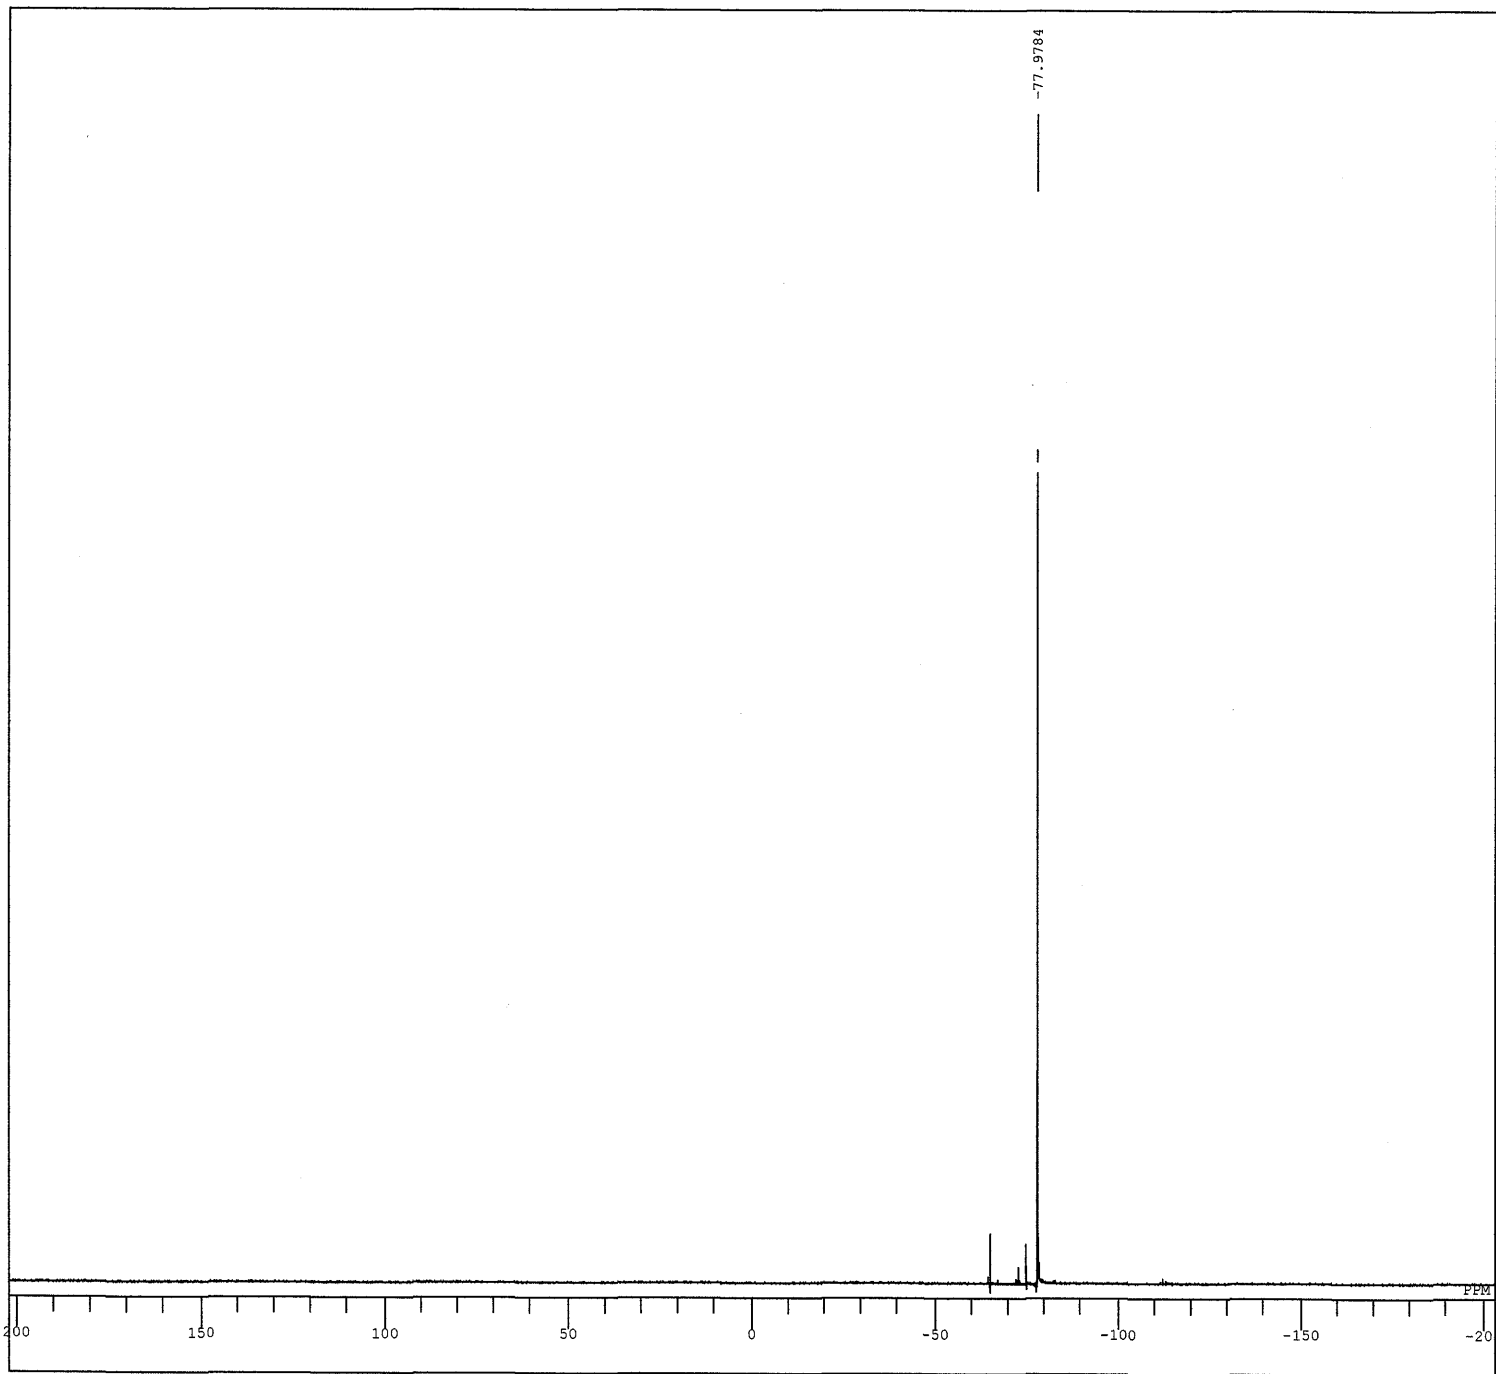

DFILE ozawa05-125\_2\_19F.jdf  
COMNT tBu-yne, PMB  
DATIM 07-08-2014 16:15:31  
OBNUC 19F  
EXMOD proton.jxp  
OBFQ 368.64 MHz  
OBSET 7.63 KHz  
OBFIN 2.85 Hz  
POINT 16384  
FREQU 186567.17 Hz  
SCANS 4  
ACQTM 0.0878 sec  
PD 5.0000 sec  
PW1 3.90 usec  
IRNUC 19F  
CTEMP 24.9 c  
SLVNT CDCL3  
EXREF -164.90 ppm  
BF 0.12 Hz  
RGAIN 48

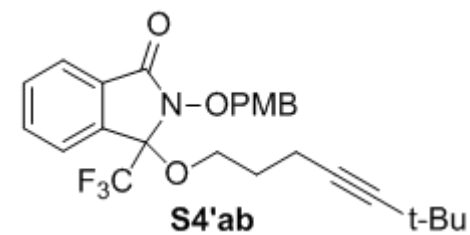



tBu-yne, OH

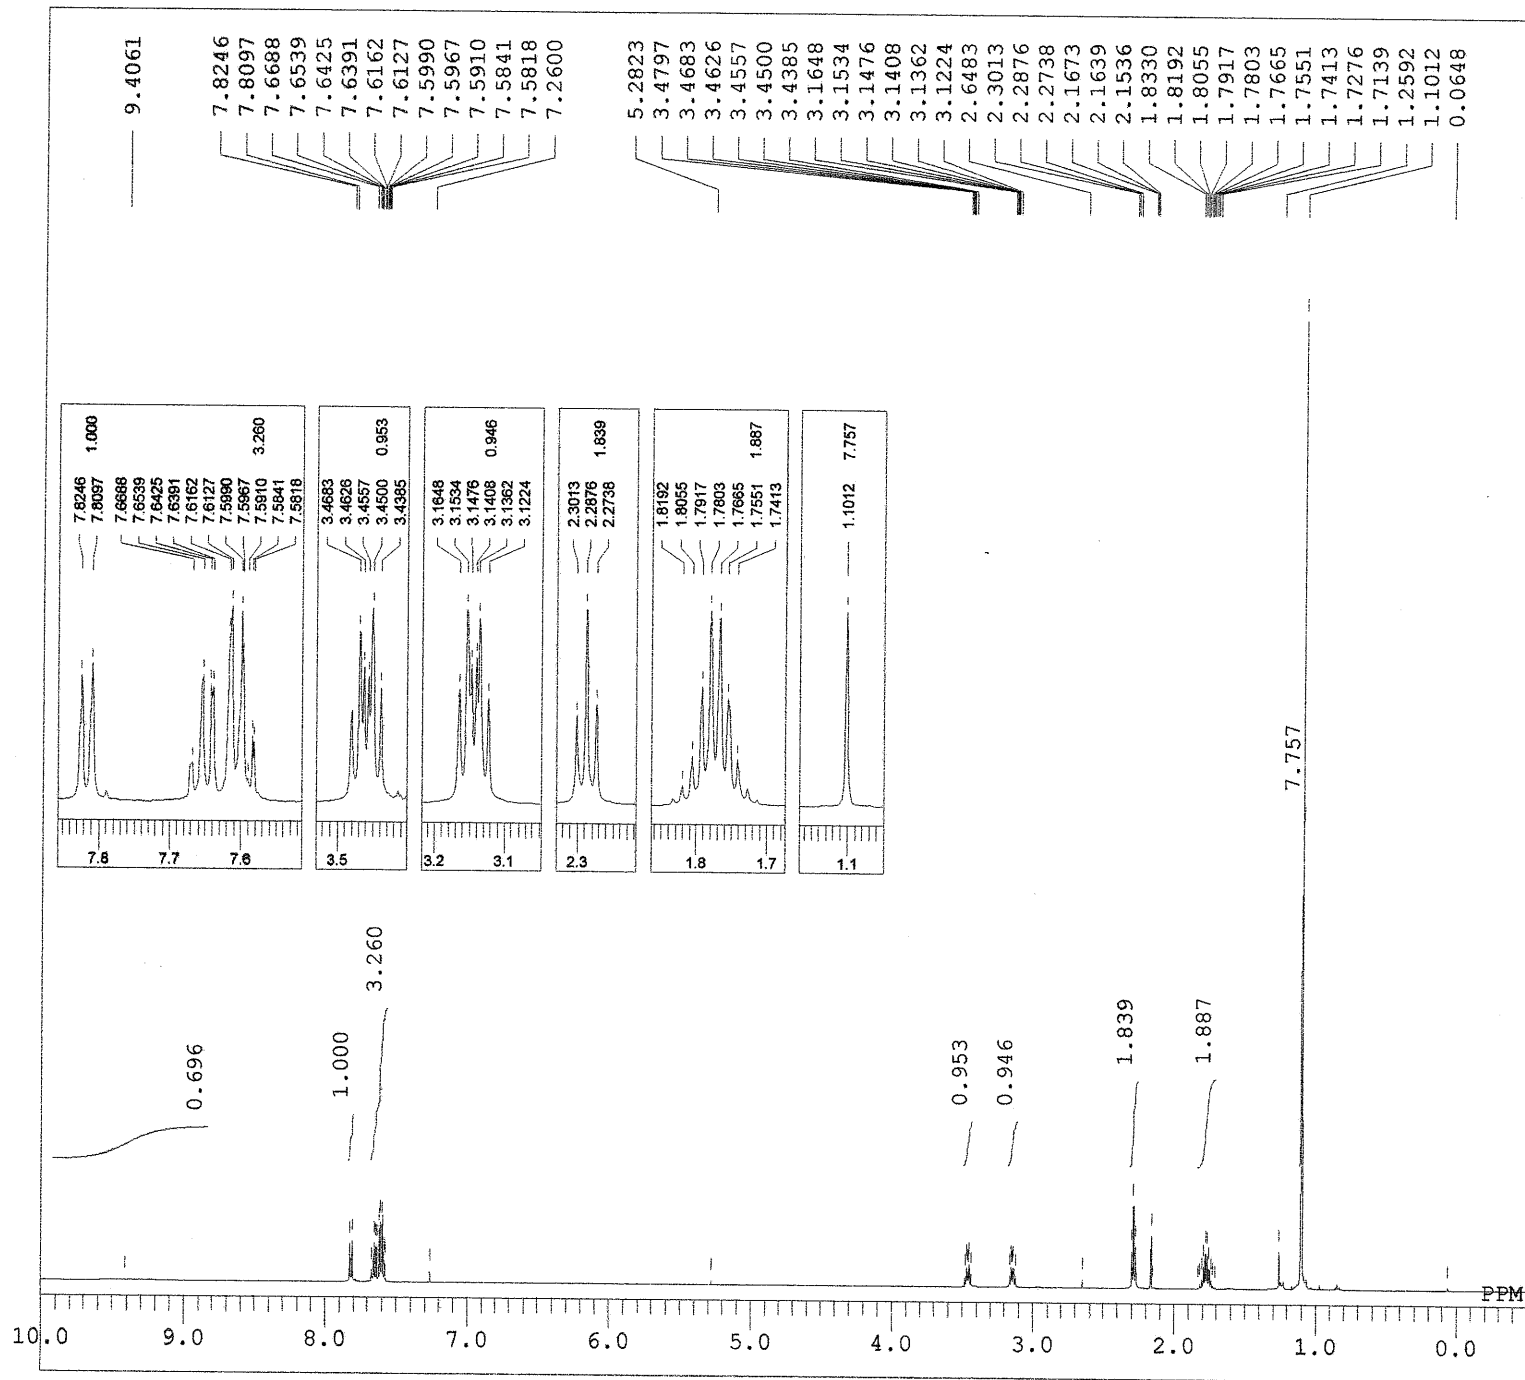

DFILE ozawa05-128\_1\_1H.jdf  
COMNT tBu-yne, OH  
DATIM 2014-08-15 18:35:12  
OBNUC 1H  
EXMOD proton.jxp  
OBFRQ 500.16 MHz  
OBSET 2.41 KHz  
OBFIN 6.01 Hz  
POINT 16384  
FREQU 9384.38 Hz  
SCANS 4  
ACQTM 1.7459 sec  
PD 5.0000 sec  
PW1 5.55 usec  
IRNUC 1H  
CTEMP 26.1 c  
SLVNT CDCL3  
EXREF 7.26 ppm  
BF 0.12 Hz  
RGAIN 26

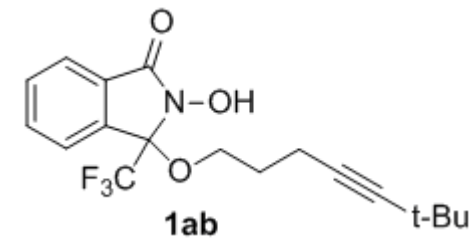

tBu-yne, OH

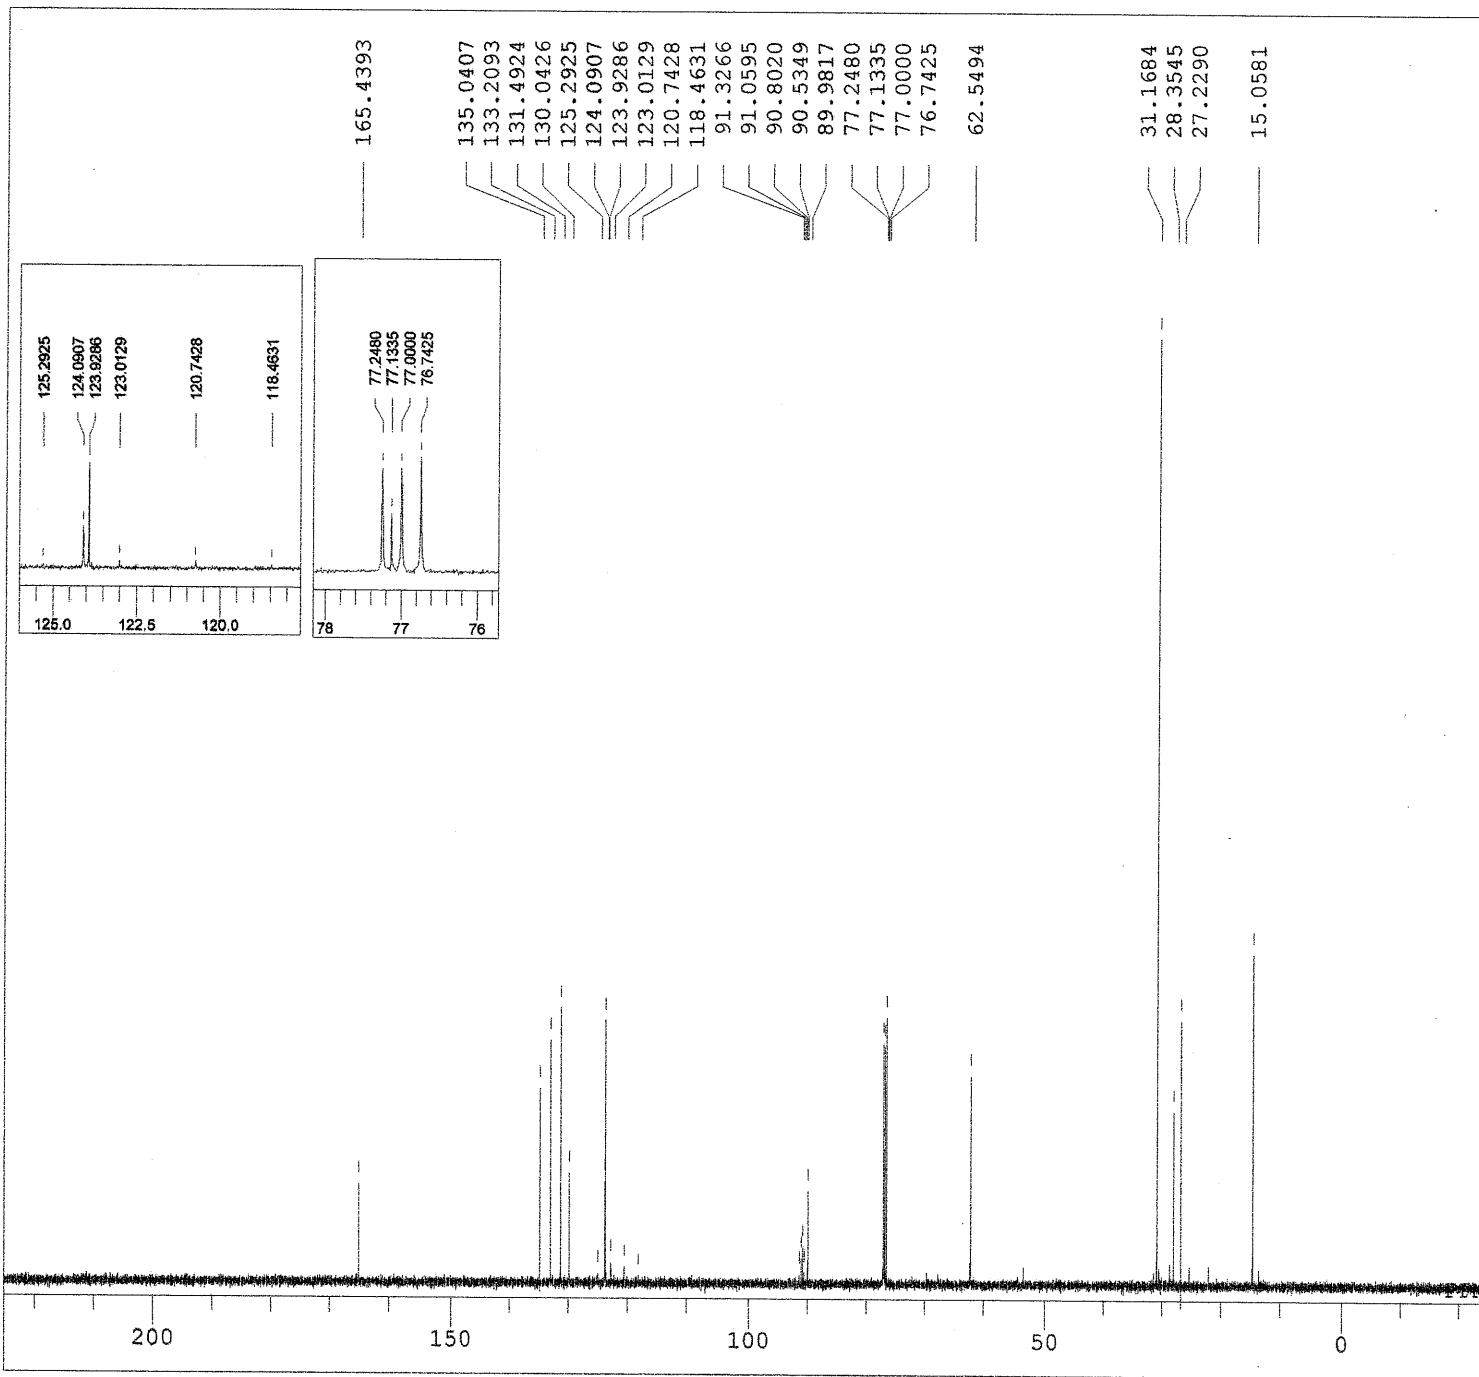

DFILE ozawa05-128\_1\_13C.jdf  
COMNT tBu-yne, OH  
DATIM 2014-08-15 18:36:15  
OBNUC 13C  
EXMOD carbon.jxp  
OBFRQ 125.77 MHz  
OBSET 7.87 KHz  
OBFIN 4.21 Hz  
POINT 32767  
FREQU 39308.18 Hz  
SCANS 81  
ACQTM 0.8336 sec  
PD 3.0000 sec  
PW1 3.40 usec  
IRNUC 1H  
CTEMP 26.5 c  
SLVNT CDCL3  
EXREF 77.00 ppm  
BF 0.12 Hz  
RGAIN 60

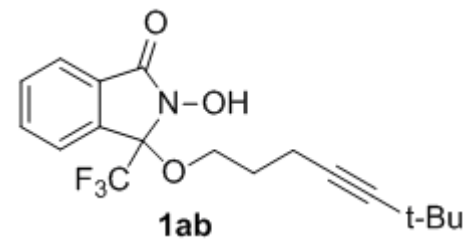

tBu-yne, OH

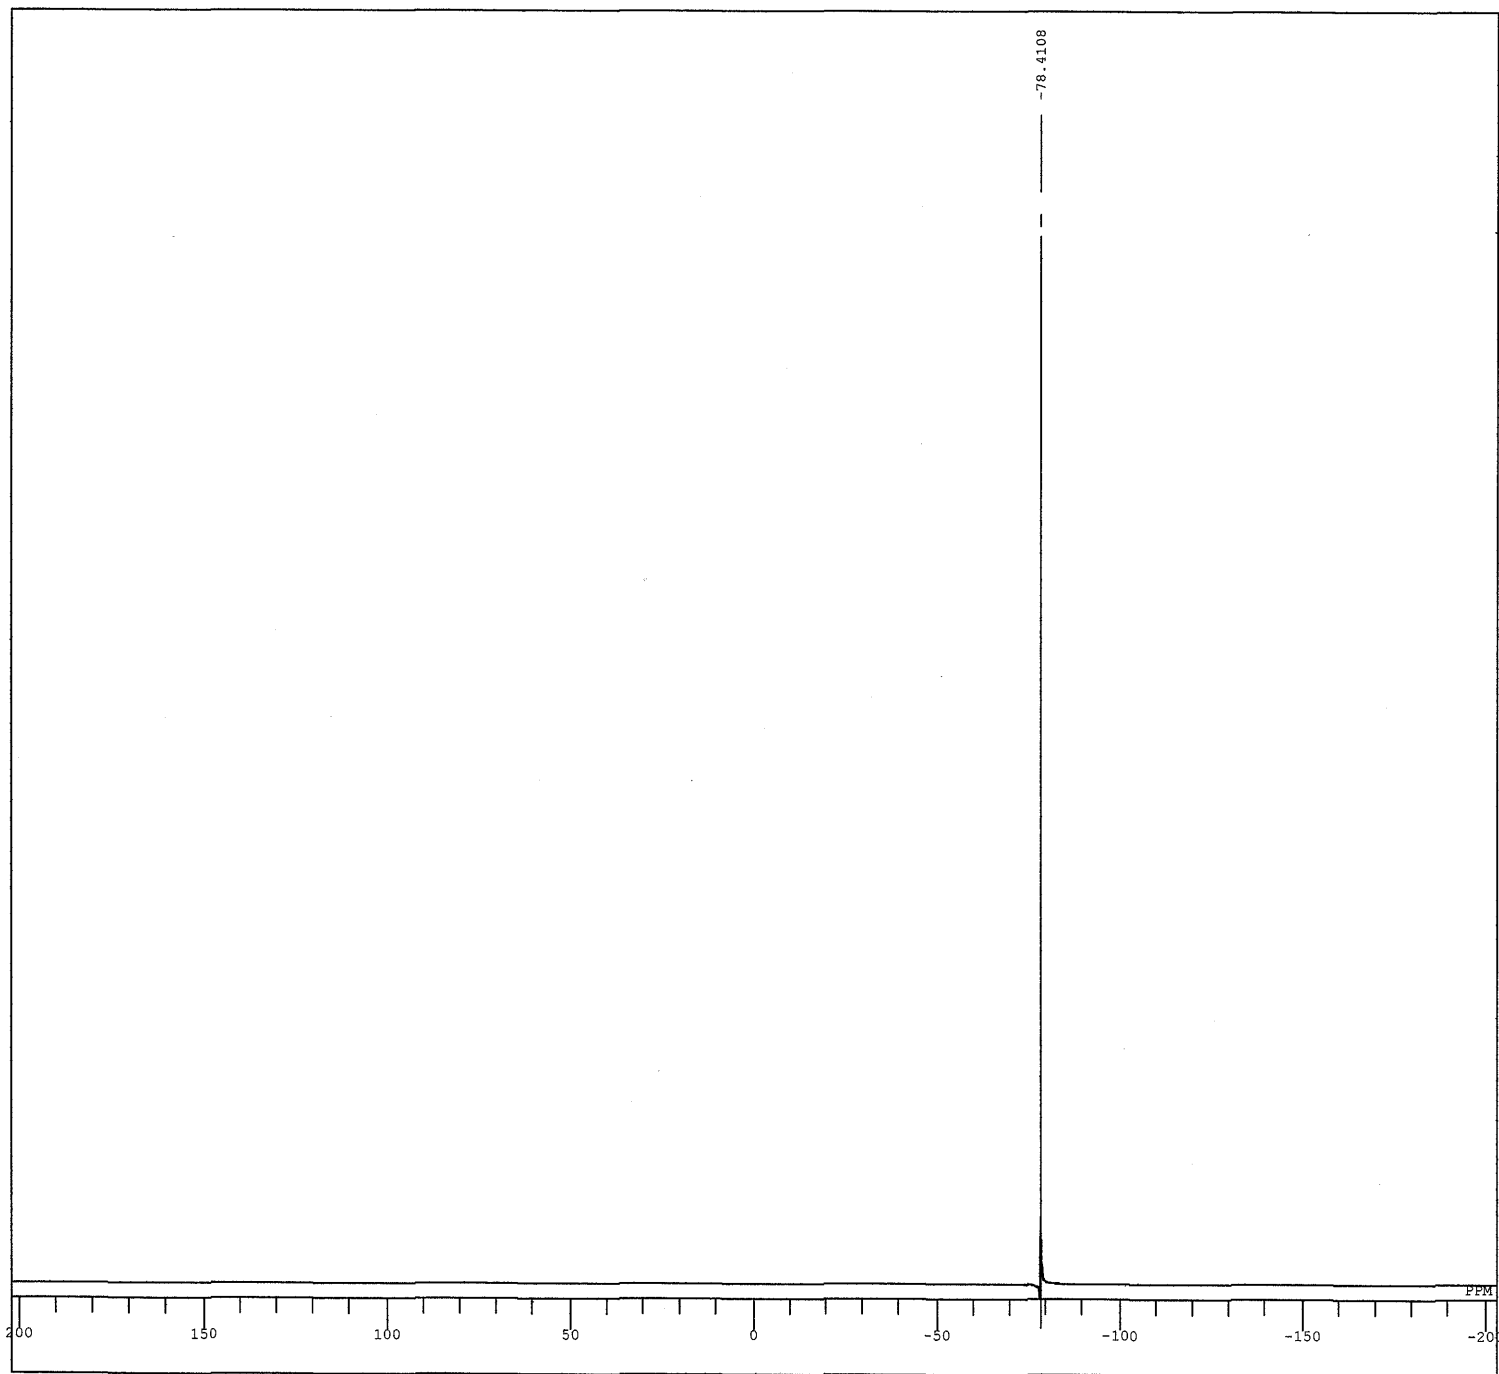

DFILE ozawa05-128\_2\_19F.jdf  
COMNT tBu-yne, OH  
DATIM 15-08-2014 19:53:50  
OBNUC 19F  
EXMOD proton.jxp  
OBFRO 368.64 MHz  
OBSFT 7.63 KHz  
OBFIN 2.85 Hz  
POINT 16384  
FREQU 186567.17 Hz  
SCANS 4  
ACQTM 0.0878 sec  
PD 5.0000 sec  
PWL 3.90 usec  
IRNUC 19F  
CTEMP 24.5 c  
SLVNT CDCL3  
EXREF -164.90 ppm  
BF 0.12 Hz  
RGAIN 44

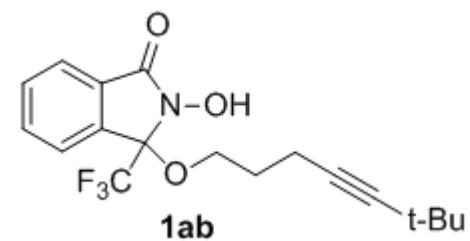

tBu-yne, [0]

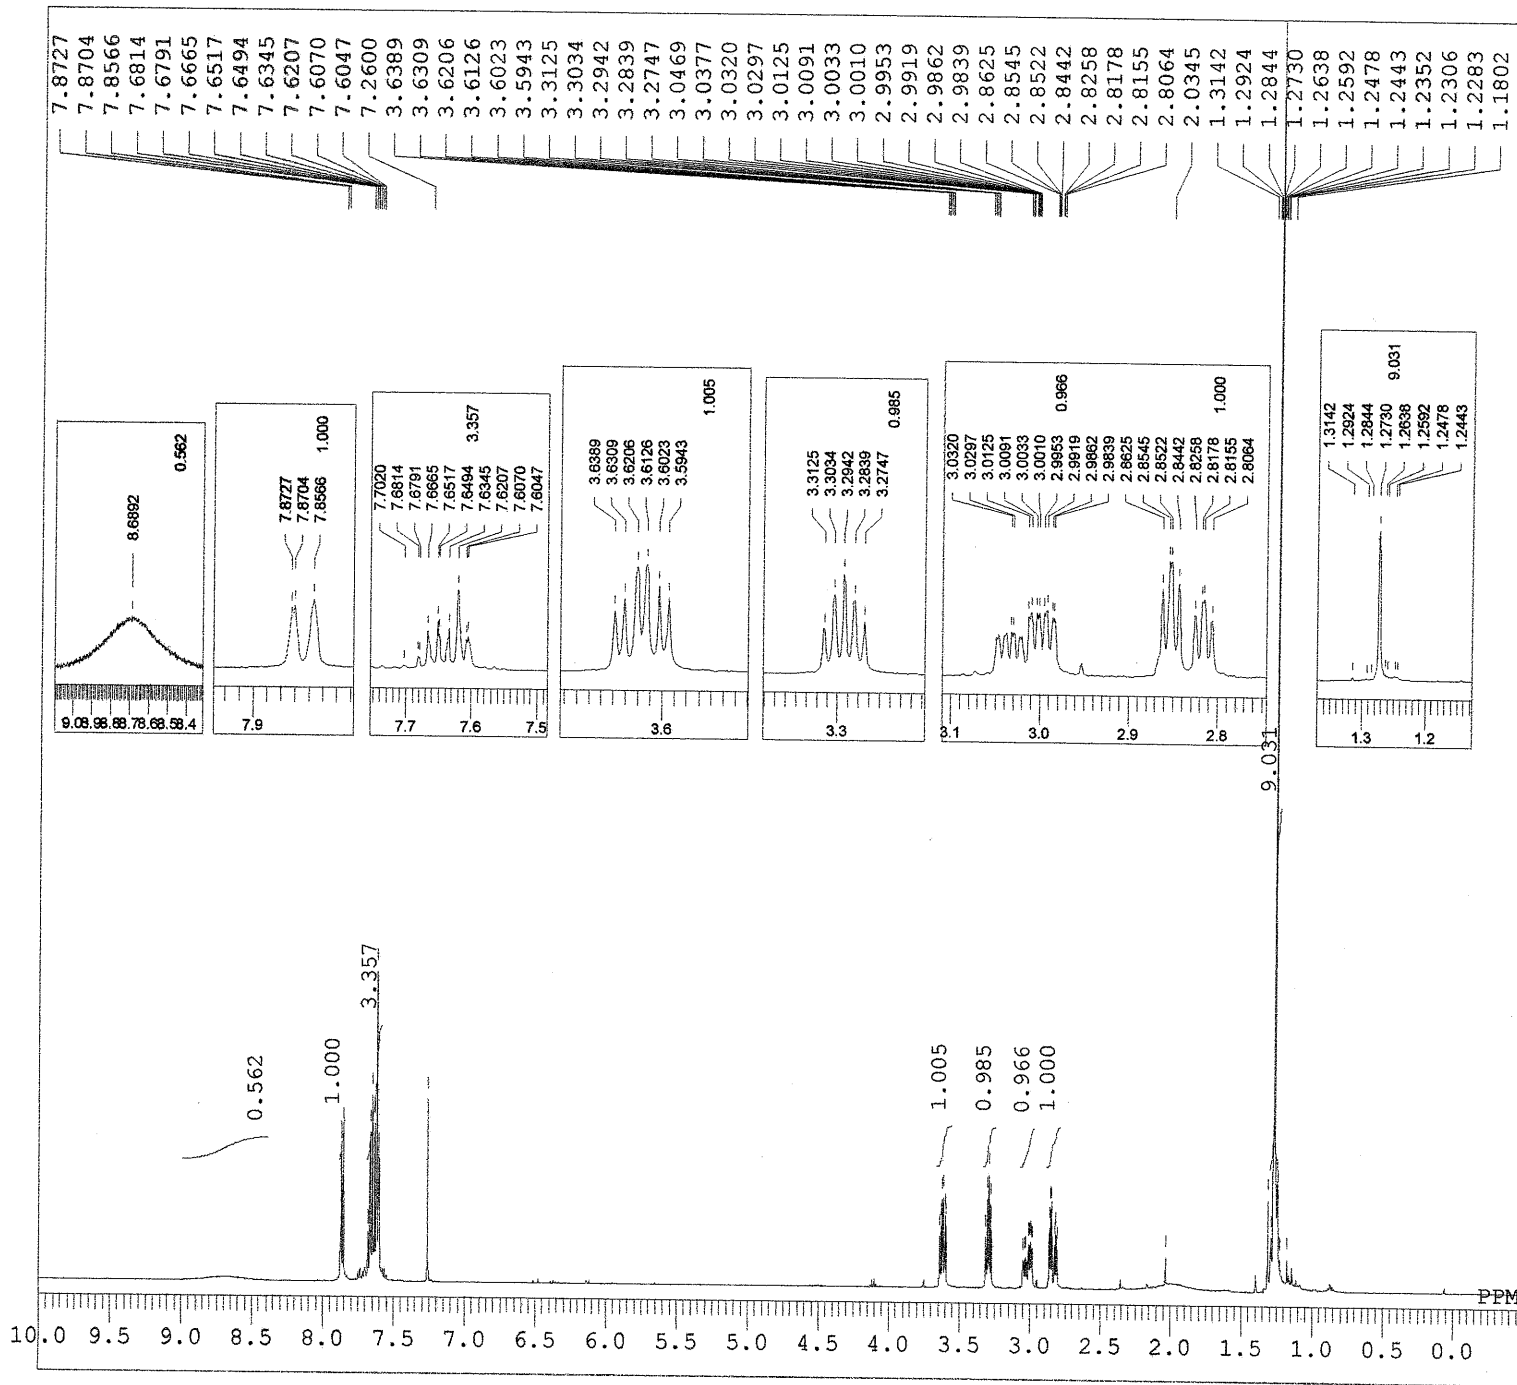

```

DFILE  ozawa05-134_2_1H.jdf
COMNT  tBu-yne, [0]
DATIM  2014-08-14 22:48:47
OBNUC  1H
EXMOD  proton.jxp
OBFRQ  500.16 MHz
OBSET  2.41 KHz
OBFIN  6.01 Hz
POINT  16384
FREQU  9384.38 Hz
SCANS  4
ACQTM  1.7459 sec
PD      5.0000 sec
PW1     5.55 usec
IRNUC  1H
CTEMP  25.7 c
SLVNT  CDCL3
EXREF  7.26 ppm
BF     0.12 Hz
RGAIN  36
    
```

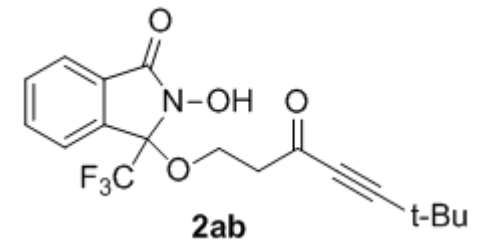

tBu-yne, [0]

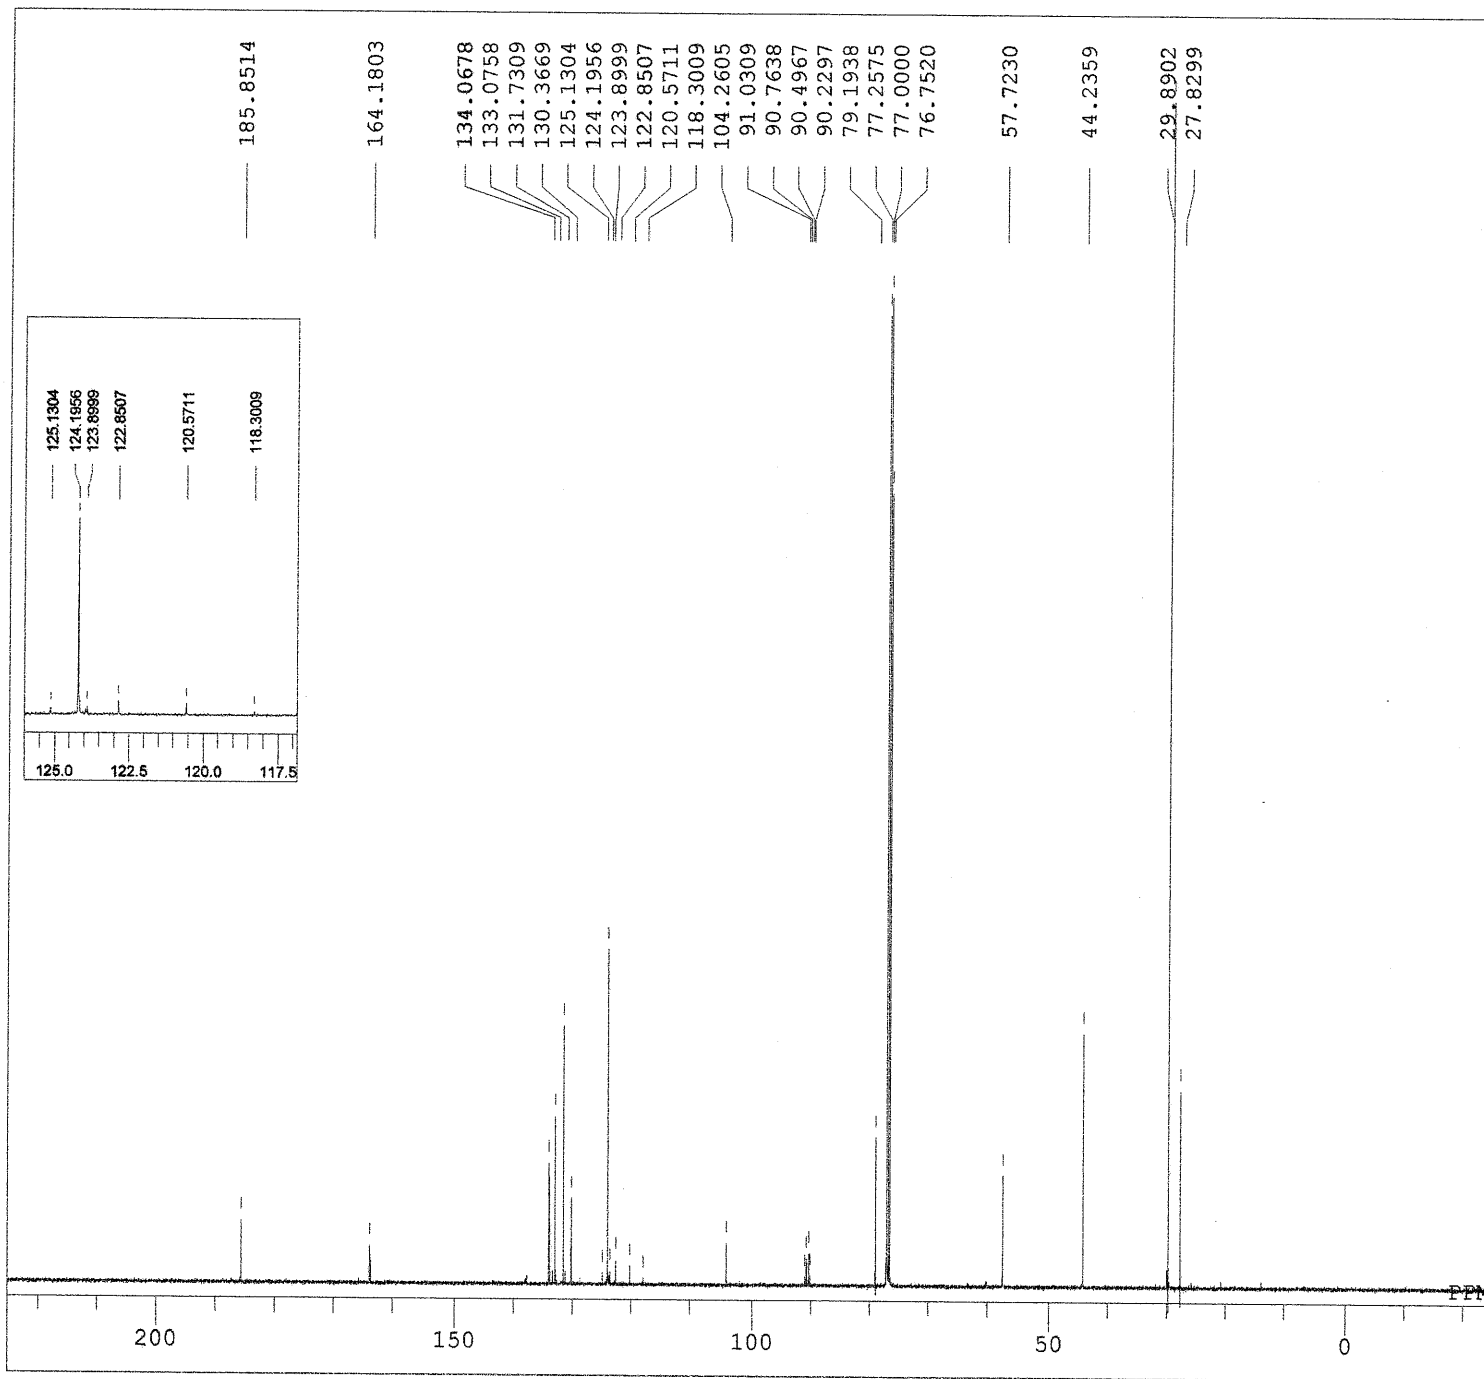

DFILE ozawa05-134\_2\_13C.jdf  
COMNT tBu-yne, [0]  
DATIM 2014-08-14 22:49:50  
OBNUC 13C  
EXMOD carbon.jxp  
OBFRQ 125.77 MHz  
OBSET 7.87 KHz  
OBFIN 4.21 Hz  
POINT 32767  
FREQU 39308.18 Hz  
SCANS 9400  
ACQTM 0.8336 sec  
PD 3.0000 sec  
PW1 3.40 usec  
IRNUC 1H  
CTEMP 26.0 c  
SLVNT CDCL3  
EXREF 77.00 ppm  
BF 0.12 Hz  
RGAIN 60

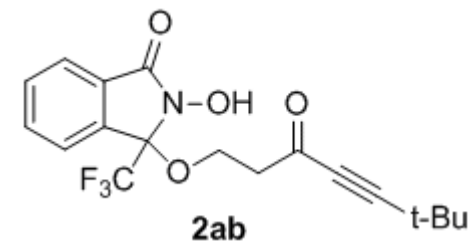

tBu-yne, [0]

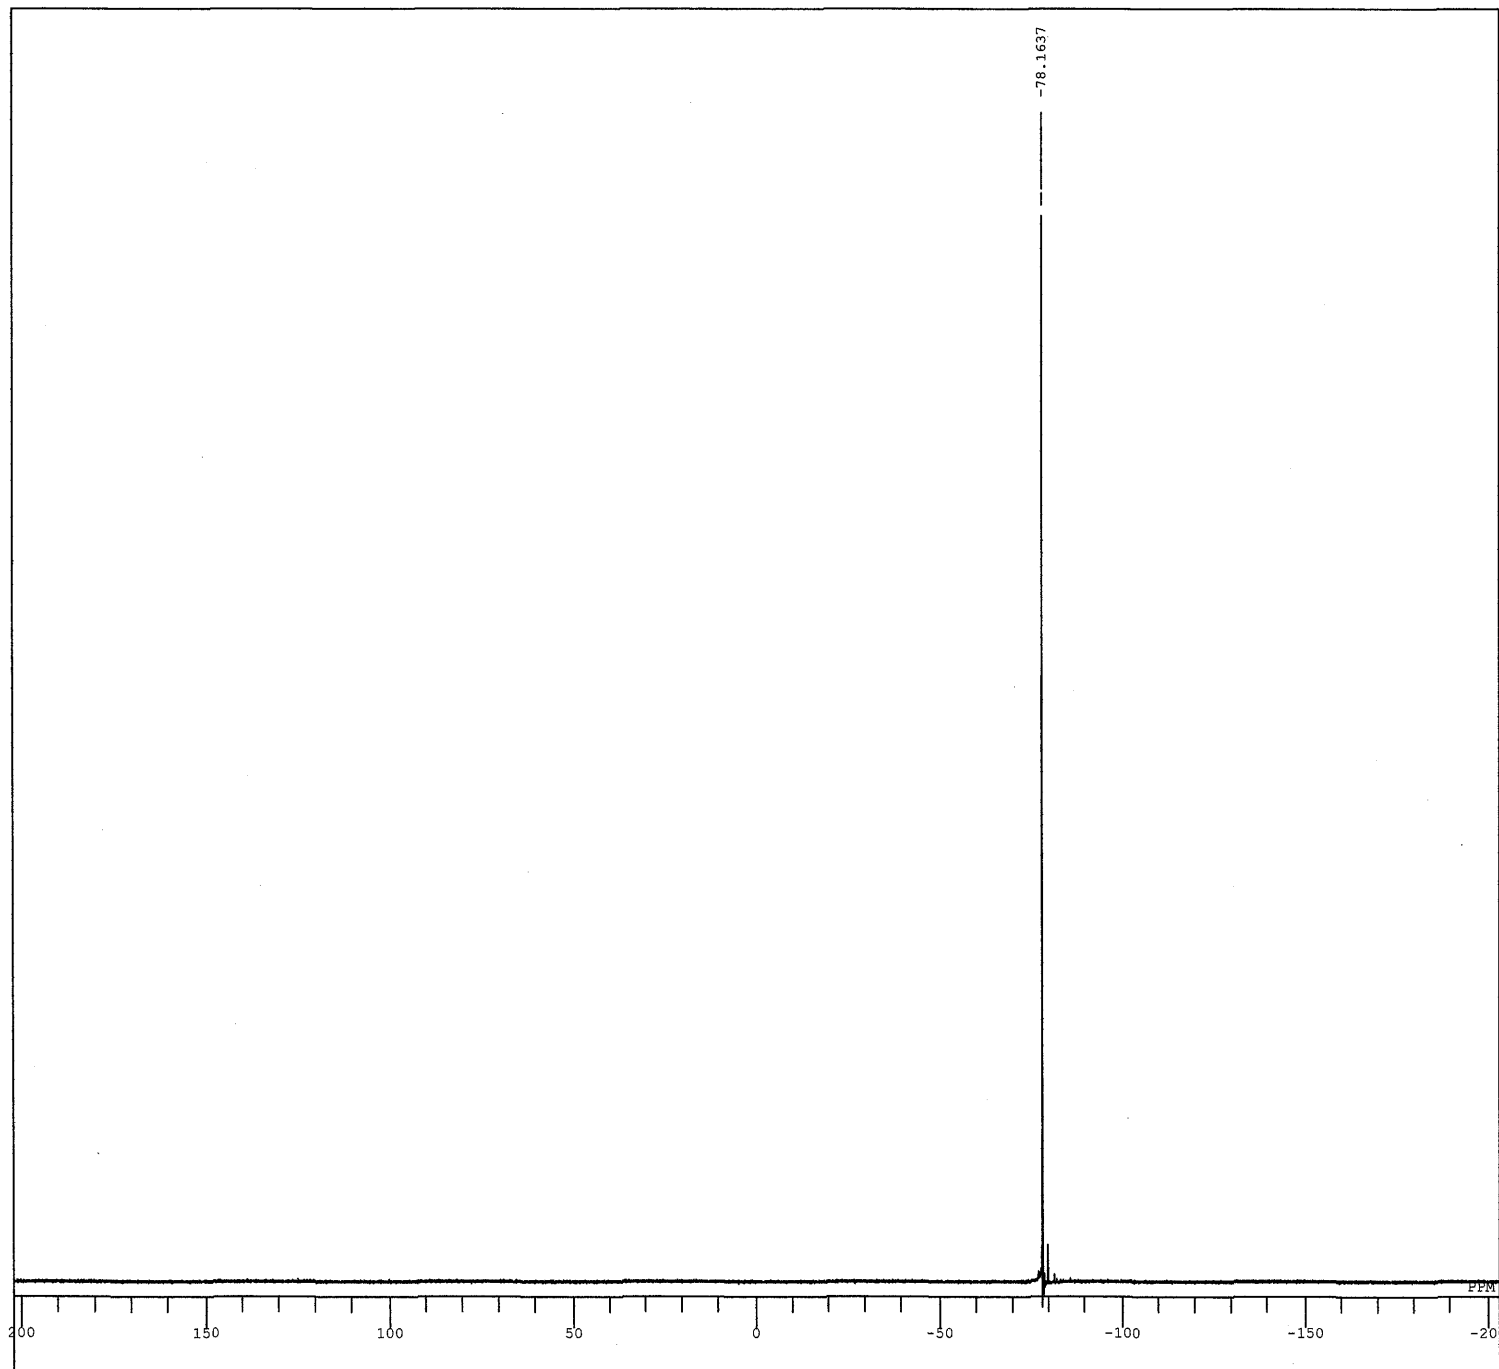

DFILE ozawa05-134\_2\_19F.jdf  
COMNT tBu-yne, [0]  
DATIM 15-08-2014 13:49:26  
OBNUC 19F  
EXMOD proton.jxp  
OBFREQ 368.64 MHz  
OBSEF 7.63 KHz  
OBFIN 2.85 Hz  
POINT 16384  
FREQU 186567.17 Hz  
SCANS 4  
ACQTM 0.0878 sec  
PD 5.0000 sec  
PWI 3.90 usec  
IRNUC 19F  
CTEMP 24.2 c  
SLVNT CDCL3  
EXREF -164.90 ppm  
BF 0.12 Hz  
RGAIN 48

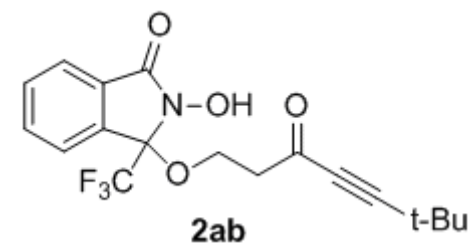

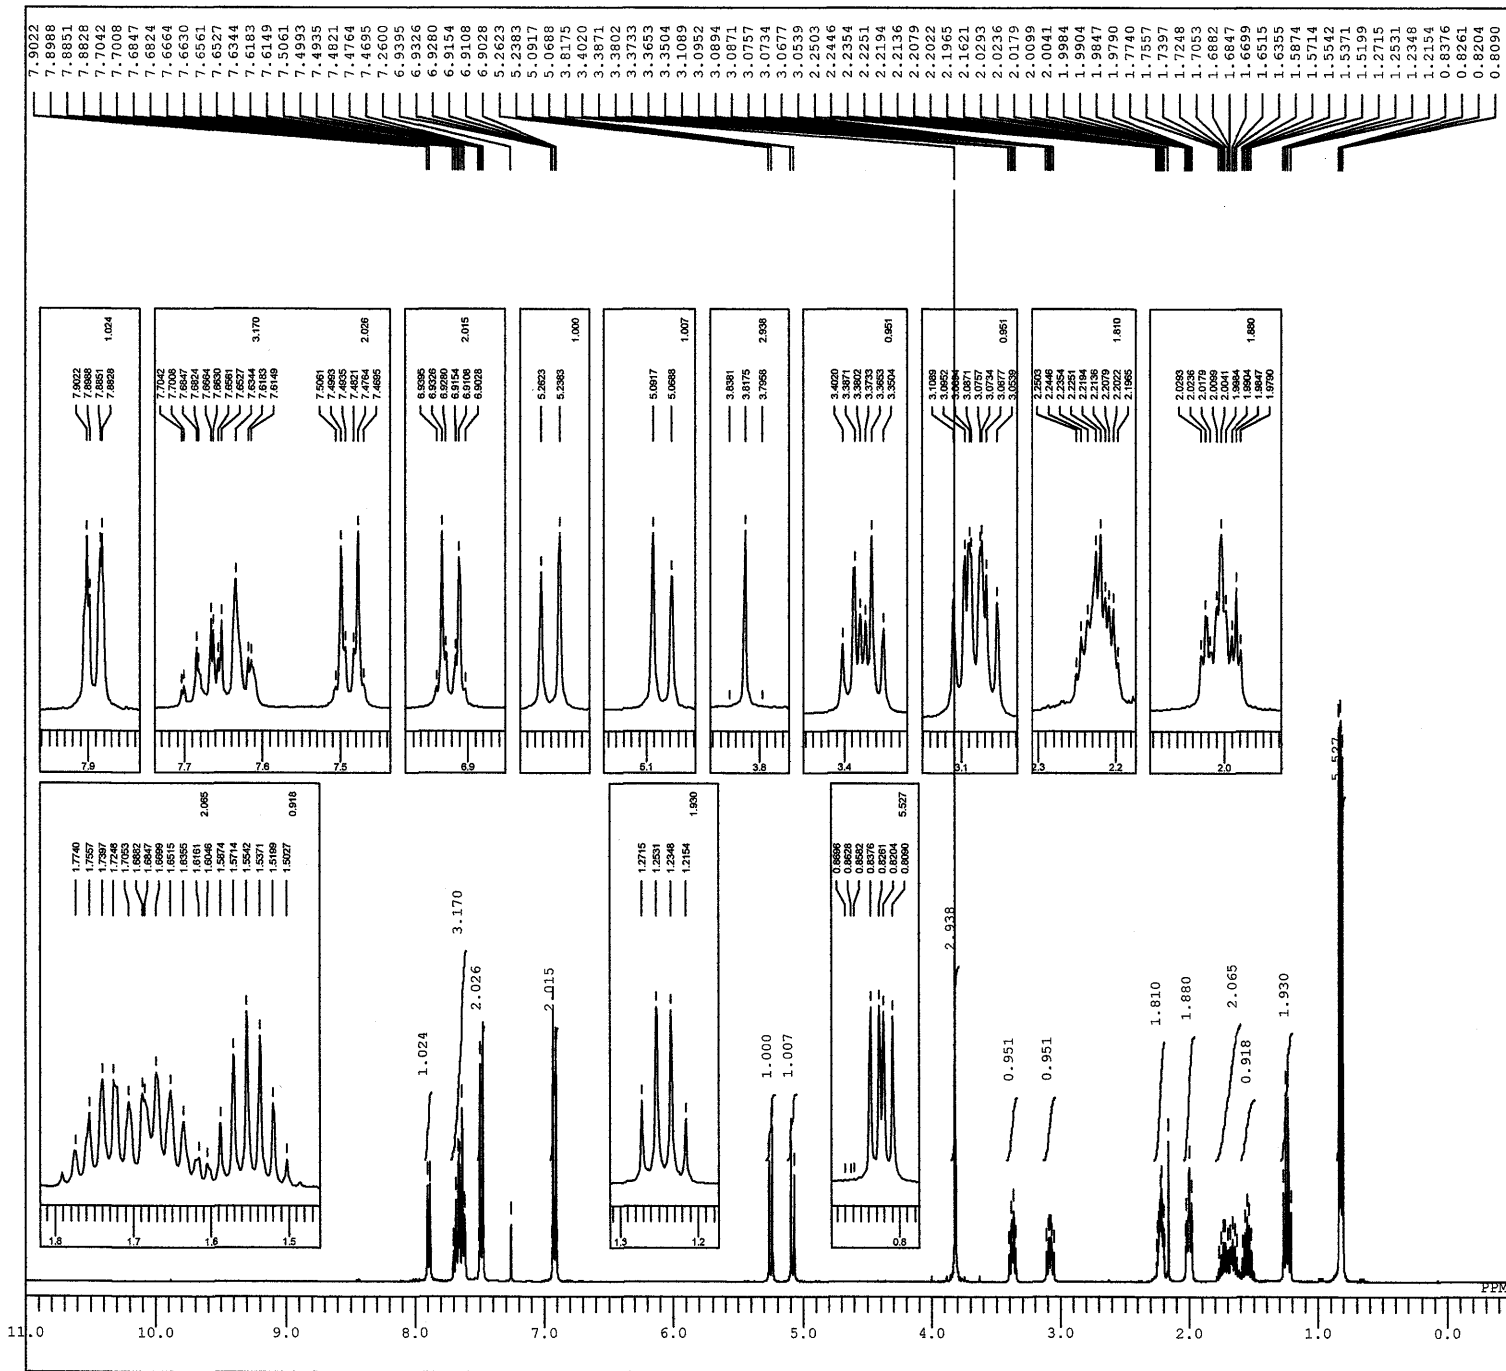

DFILE ozawa07-028 1H.jdf  
 COMNT yne-tert, PMB  
 DATIM 05-03-2015 13:49:18  
 OBNUC 1H  
 EXMOD proton.jxp  
 OBFRO 391.78 MHz  
 OBSEF 8.51 KHz  
 OBFIN 3.34 Hz  
 POINT 16384  
 FREQU 7348.62 Hz  
 SCANS 4  
 ACQTM 2.2295 sec  
 PD 5.0000 sec  
 FW1 4.99 usec  
 IRNUC 1H  
 CTEMP 23.7 c  
 SLVNT CDCL3  
 EXREF 7.26 ppm  
 BF 0.12 Hz  
 RGAIN 28

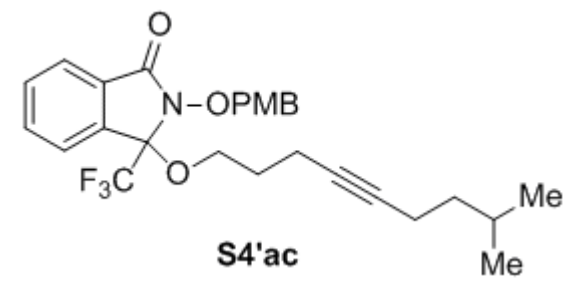

yne-tert, PMB

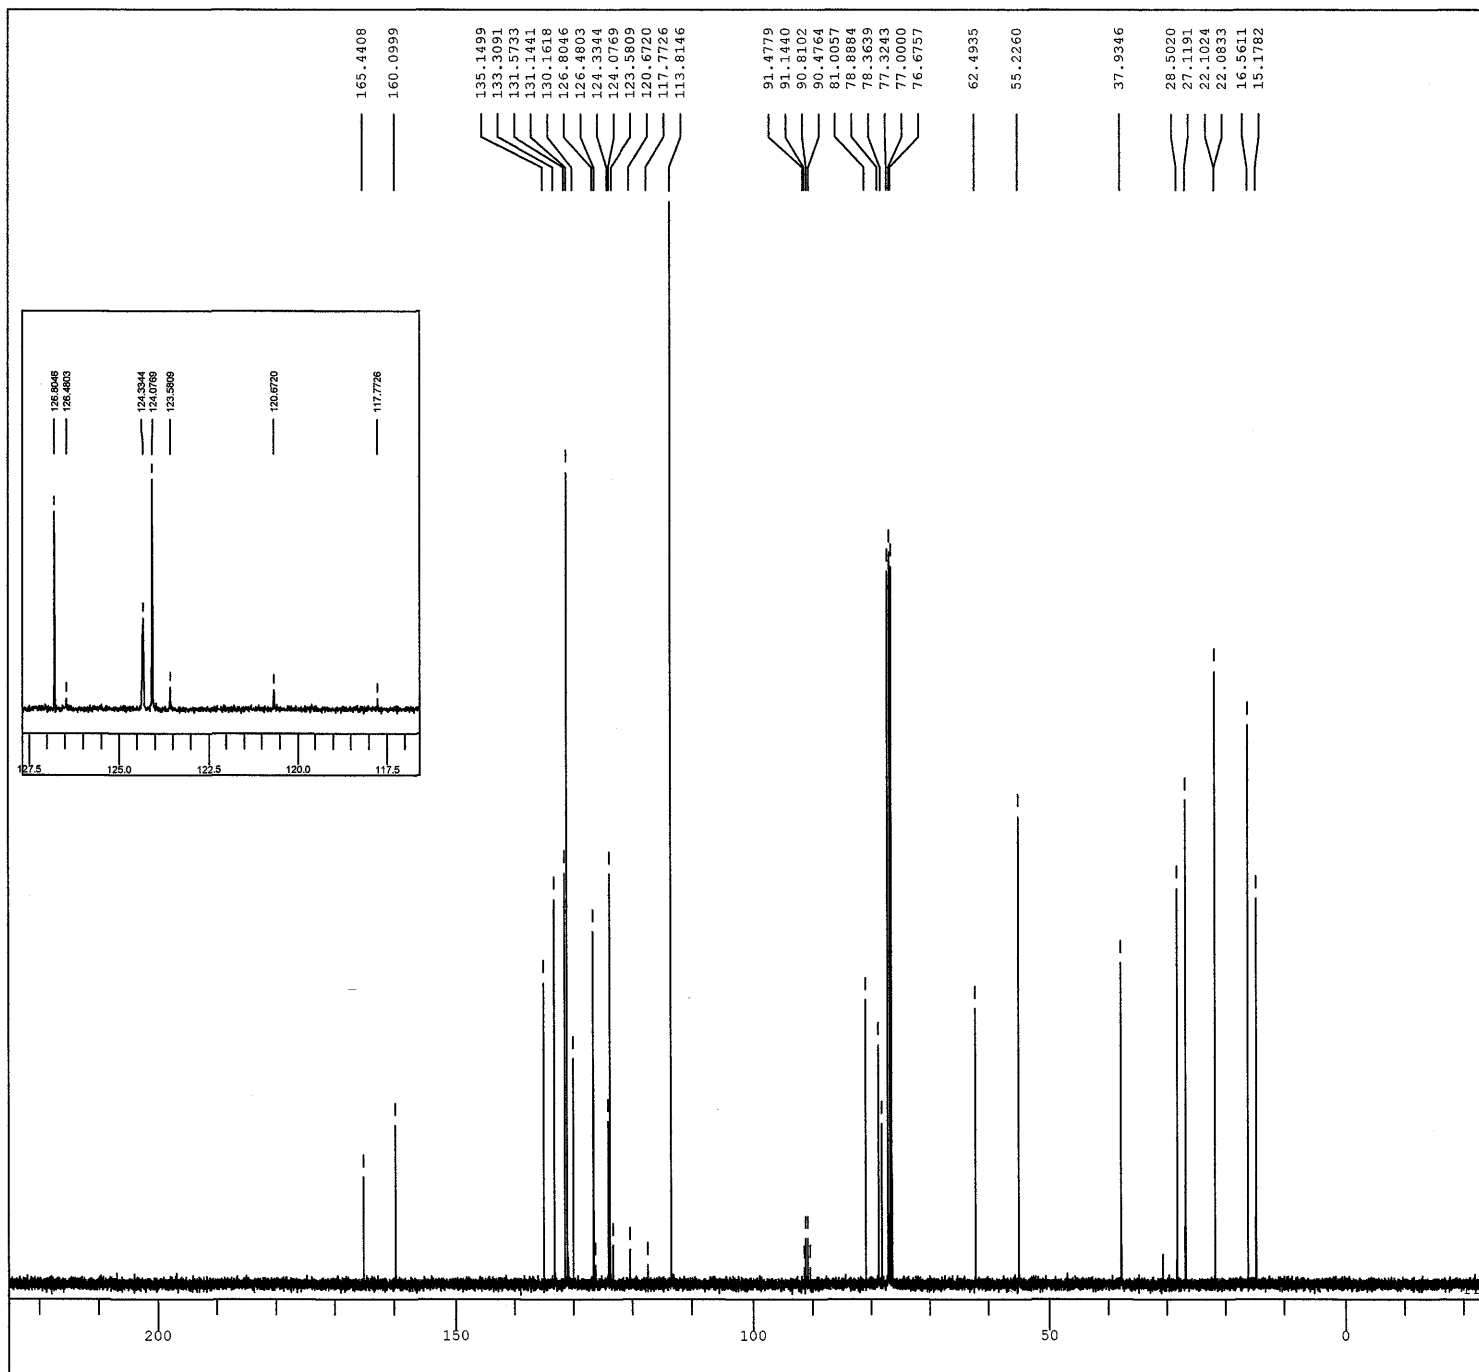

DFILE ozawa07-028 13C.jdf  
COMNT yne-tert, PMB  
DATIM 05-03-2015 13:50:22  
OBNUC 13C  
EXMOD carbon.jxp  
OBFRO 98.52 MHz  
OBSFE 4.64 KHz  
OBFIN 8.74 Hz  
POINT 32767  
FREQU 30788.18 Hz  
SCANS 904  
ACQTM 1.0643 sec  
FD 2.0000 sec  
PW1 3.16 usec  
IRNUC 1H  
CTEMP 23.8 c  
SLVNT CDCL3  
EXREF 77.00 ppm  
BF 0.12 Hz  
RGAIN 60

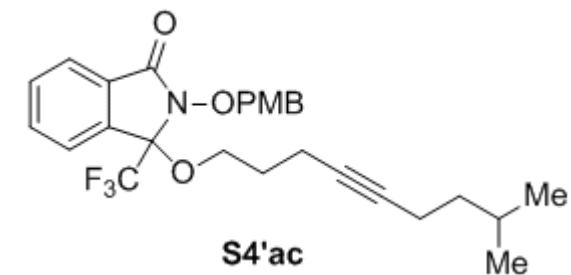



yne-tert, PMB

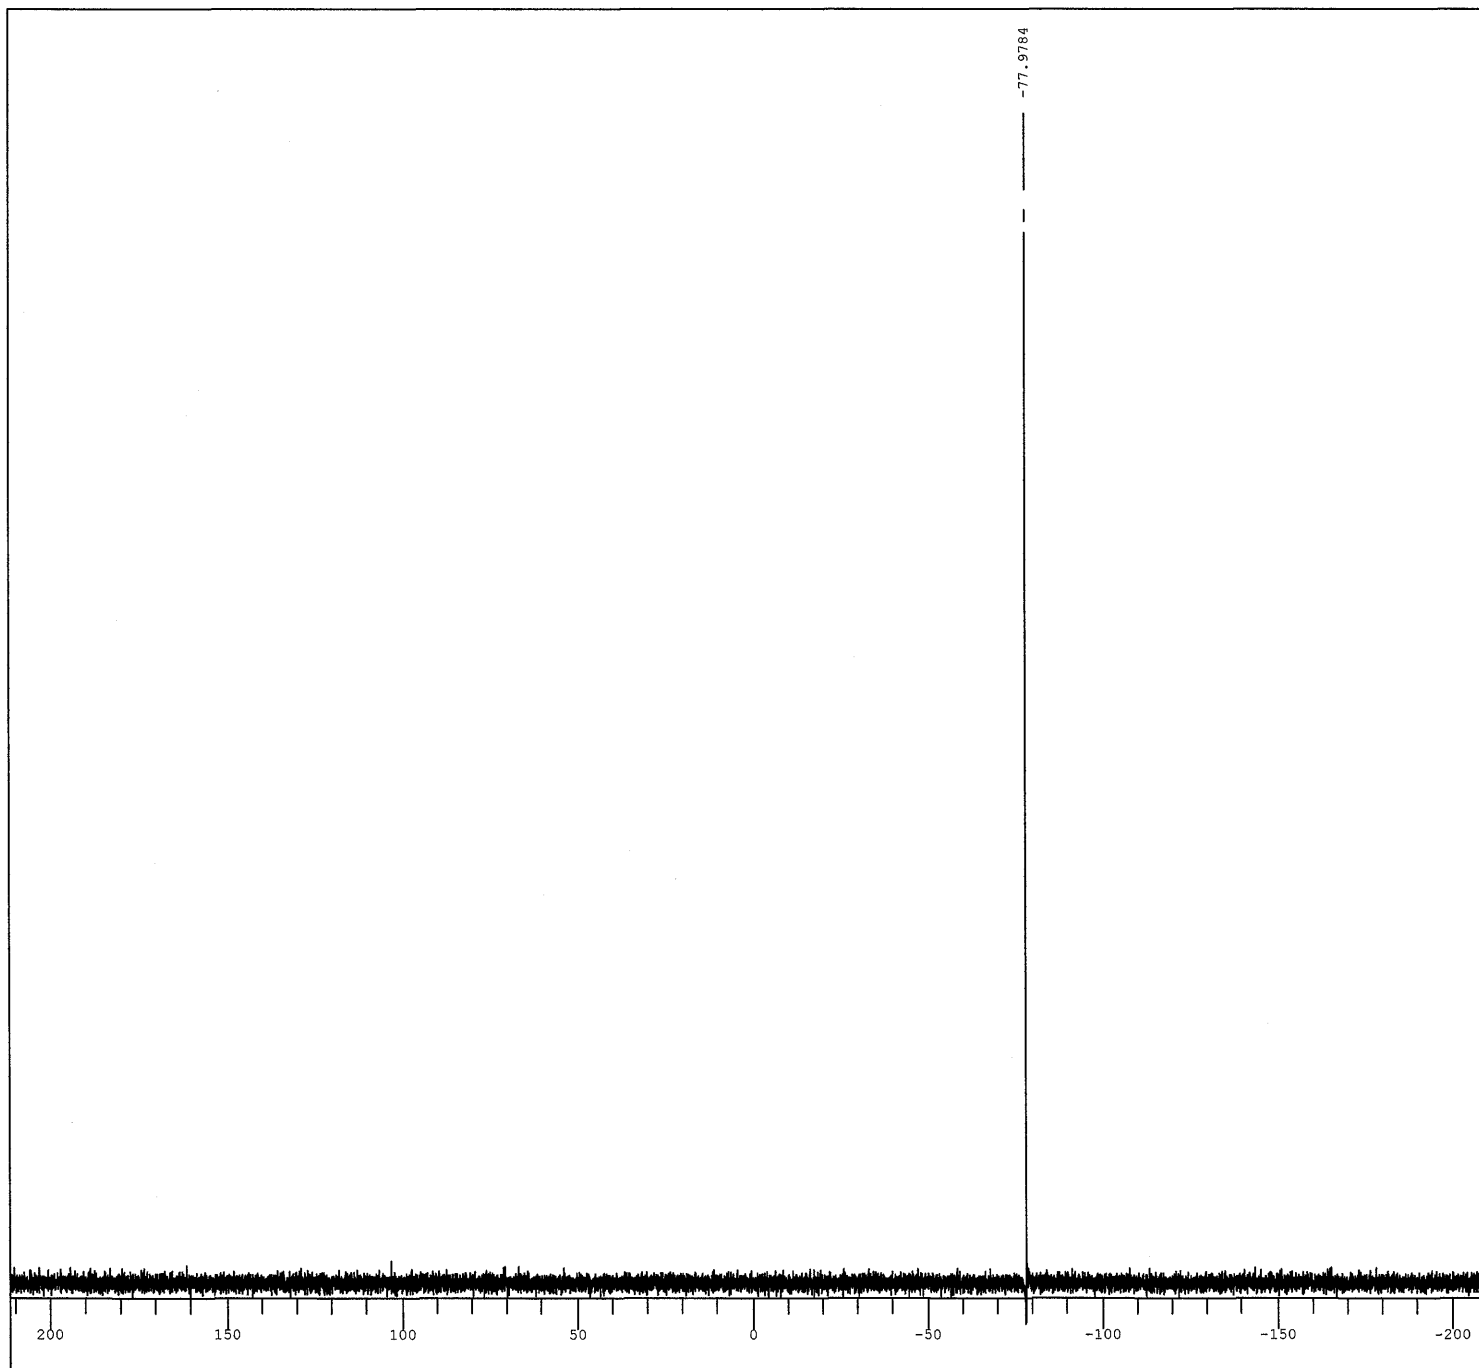

DFILE ozawa07-028 19F.jdf  
COMNT yne-tert, PMB  
DATIM 21-03-2015 12:16:18  
OBNUC 19F  
EXMOD proton.jxp  
OBFREQ 368.64 MHz  
OBSET 7.63 KHz  
OBFIN 2.85 Hz  
POINT 16384  
FREQU 195312.50 Hz  
SCANS 4  
ACQTM 0.0839 sec  
PD 5.0000 sec  
PW1 3.90 usec  
IRNUC 19F  
CTEMP 25.0 c  
SLVNT CDCL3  
EXREF -164.90 ppm  
BF 0.12 Hz  
RGAIN 50

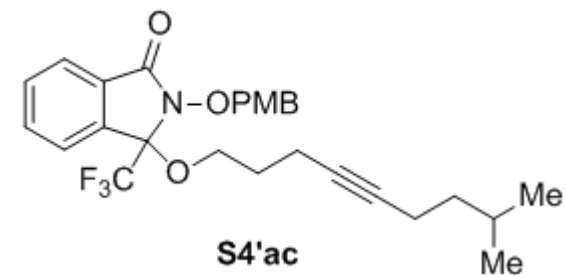

yne-tert, OH

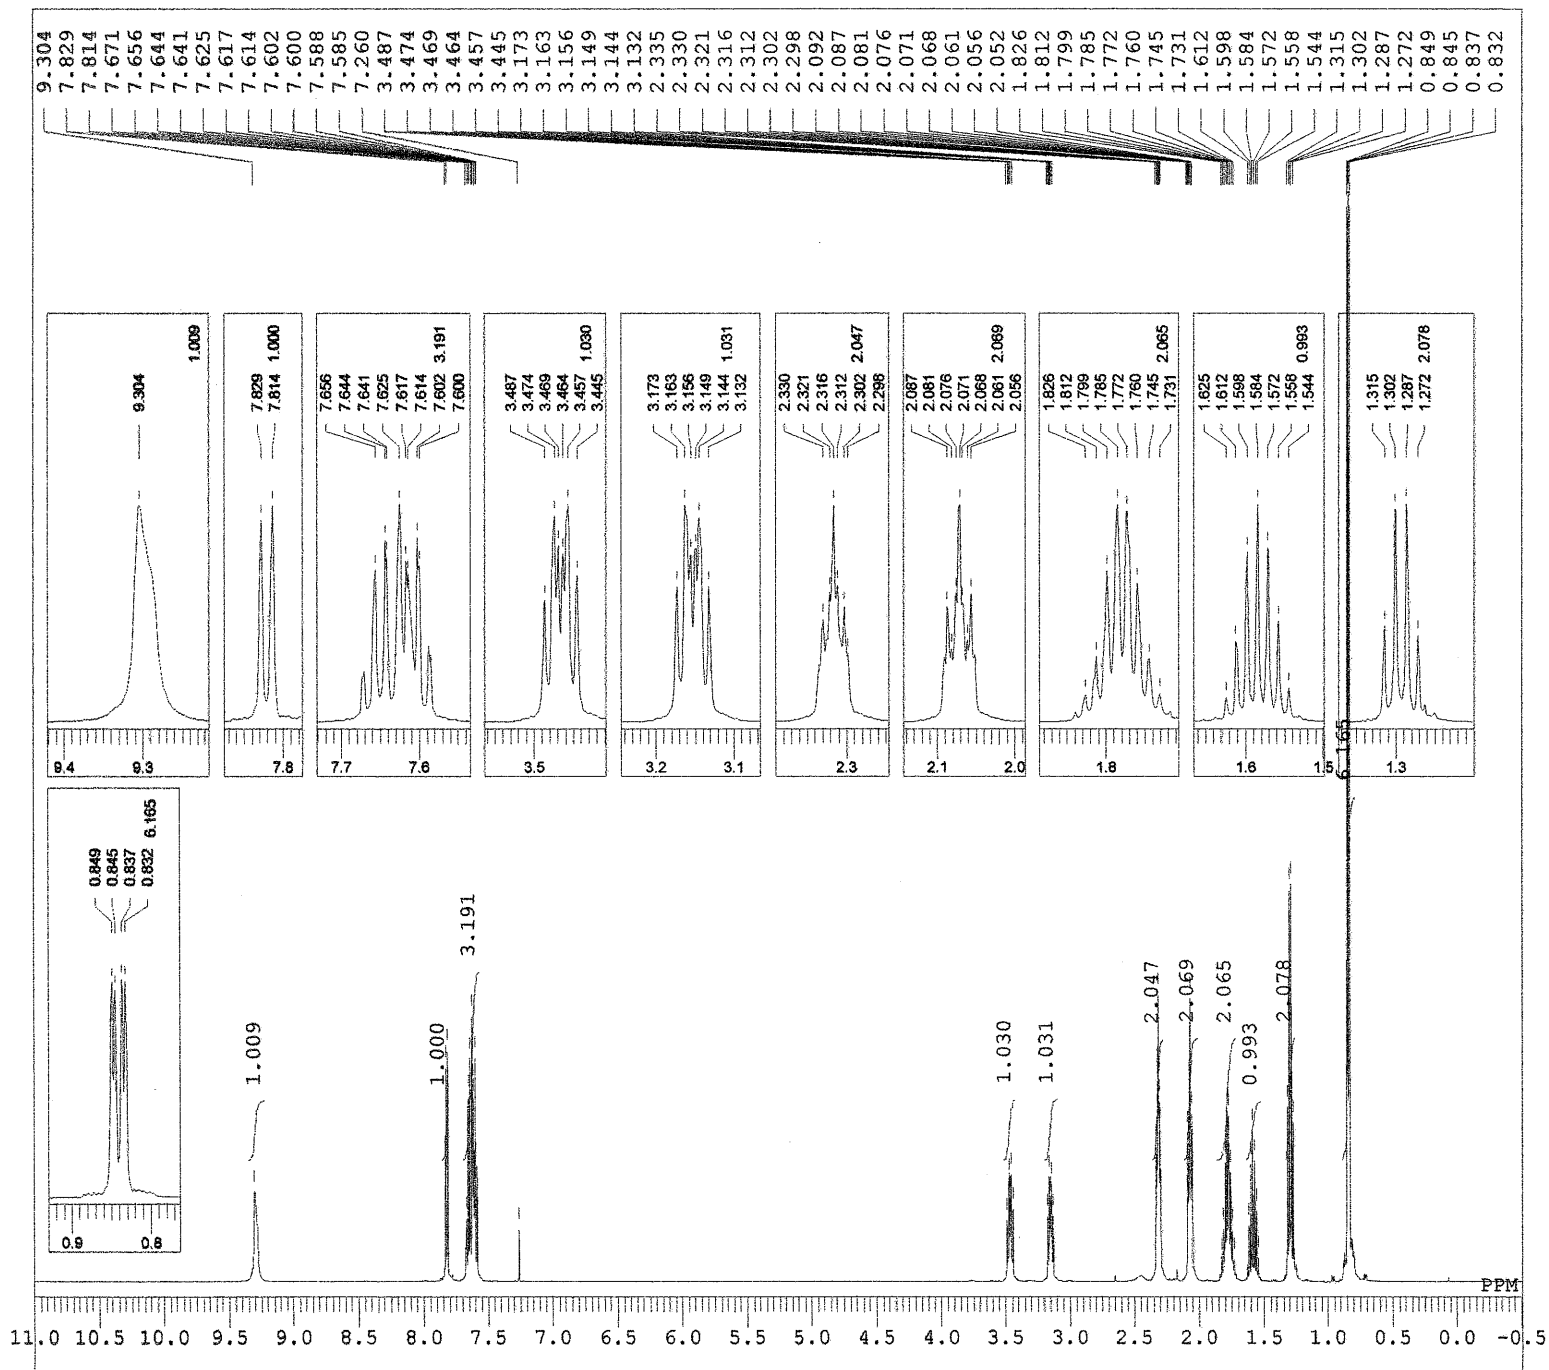

DFILE ozawa07-025\_1H.jdf  
COMNT yne-tert, OH  
DATIM 2015-03-07 12:46:00  
OBNUC 1H  
EXMOD proton.jxp  
OBFREQ 500.16 MHz  
OBSET 2.41 KHz  
OBFIN 6.01 Hz  
POINT 16384  
FREQU 9384.38 Hz  
SCANS 8  
ACQTM 1.7459 sec  
PD 5.0000 sec  
PW1 5.55 usec  
IRNUC 1H  
CTEMP 25.2 c  
SLVNT CDCL3  
EXREF 7.26 ppm  
BF 0.12 Hz  
RGAIN 26

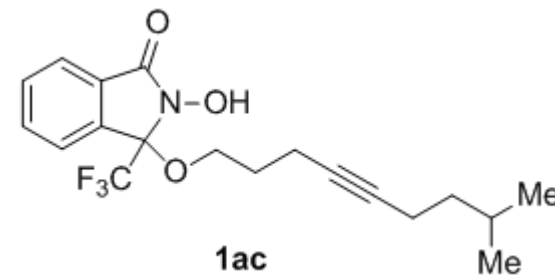

yne-tert, OH

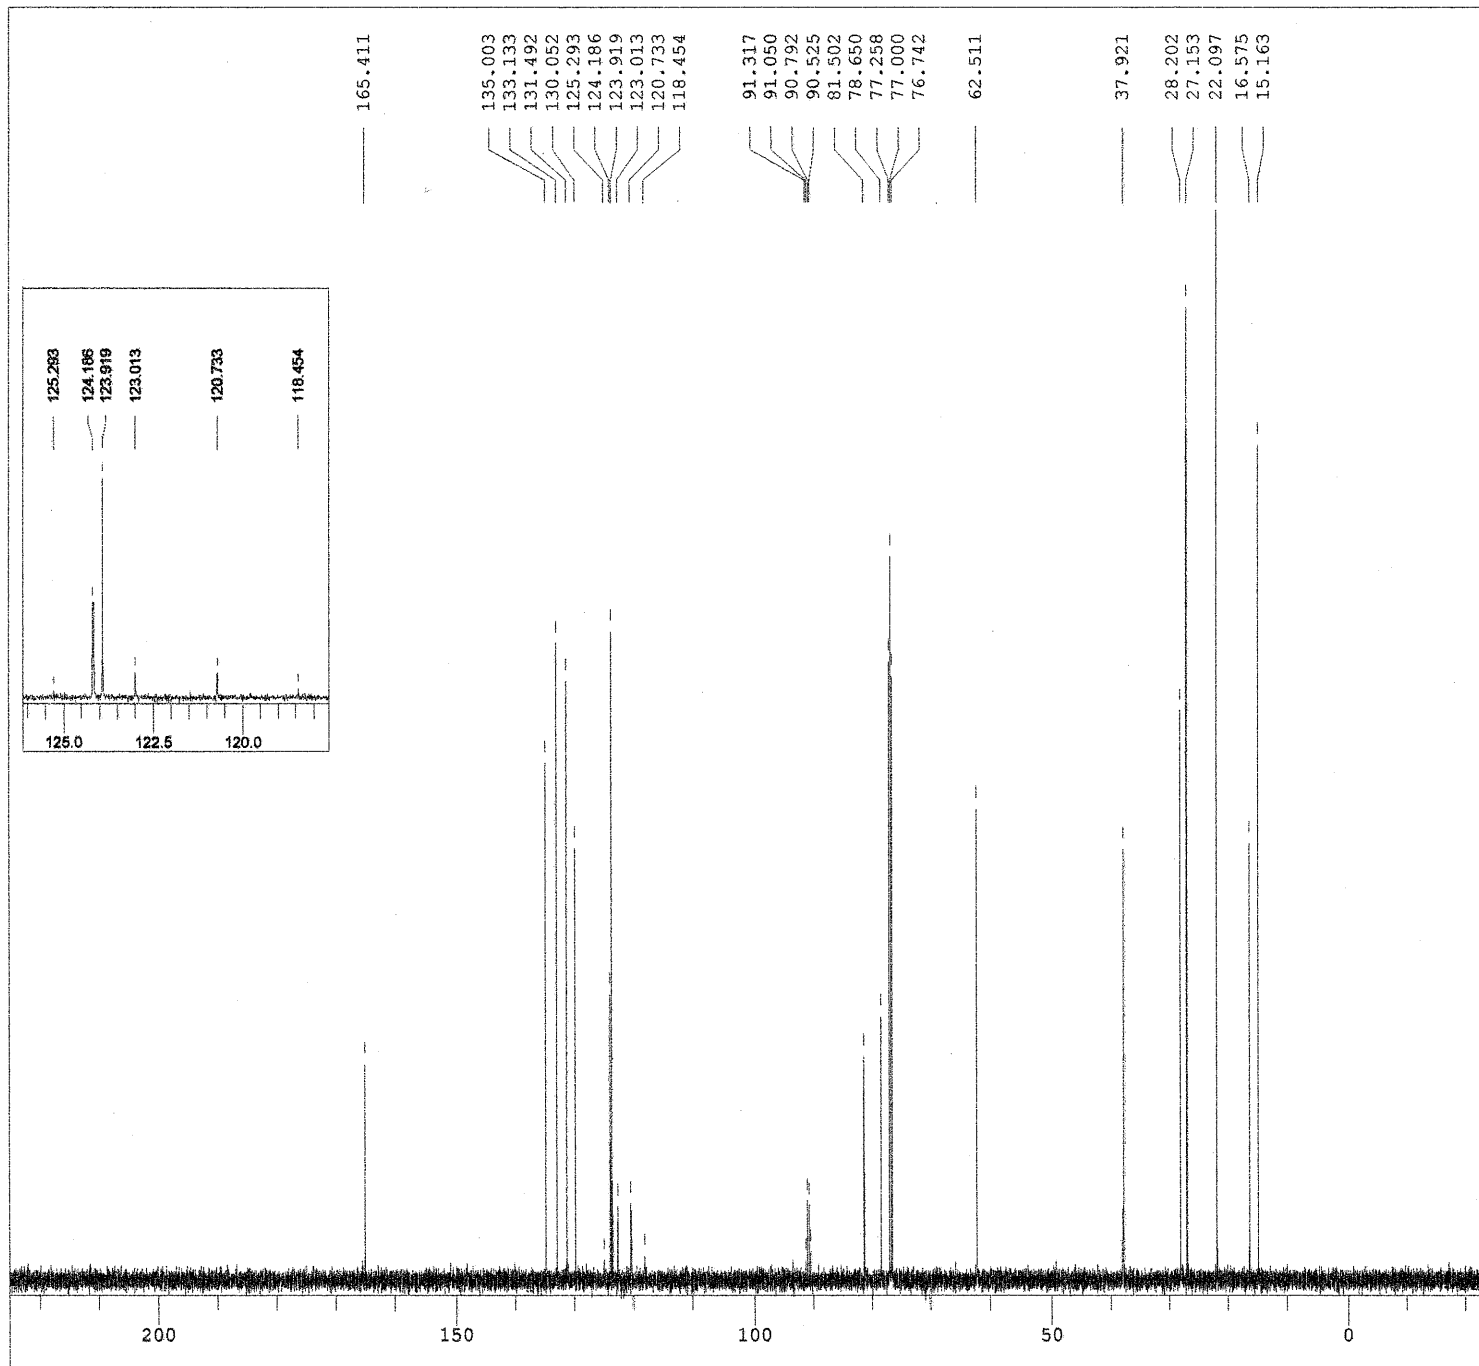

DFILE ozawa07-025\_13C.jdf  
COMNT yne-tert, OH  
DATIM 2015-03-07 12:47:30  
OBNUC 13C  
EXMOD carbon.jxp  
OBFRQ 125.77 MHz  
OBSET 7.87 KHz  
OBFIN 4.21 Hz  
POINT 32767  
FREQU 39308.18 Hz  
SCANS 180  
ACQTM 0.8336 sec  
PD 2.0000 sec  
PW1 3.40 usec  
IRNUC 1H  
CTEMP 25.7 c  
SLVNT CDCL3  
EXREF 77.00 ppm  
BF 0.12 Hz  
RGAIN 60

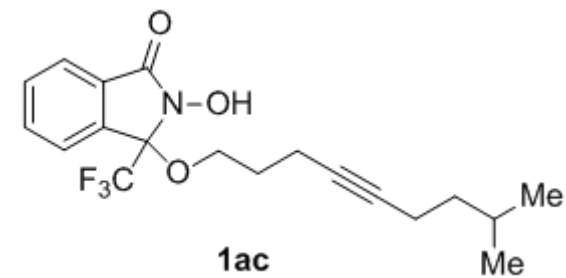

yne-tert, OH

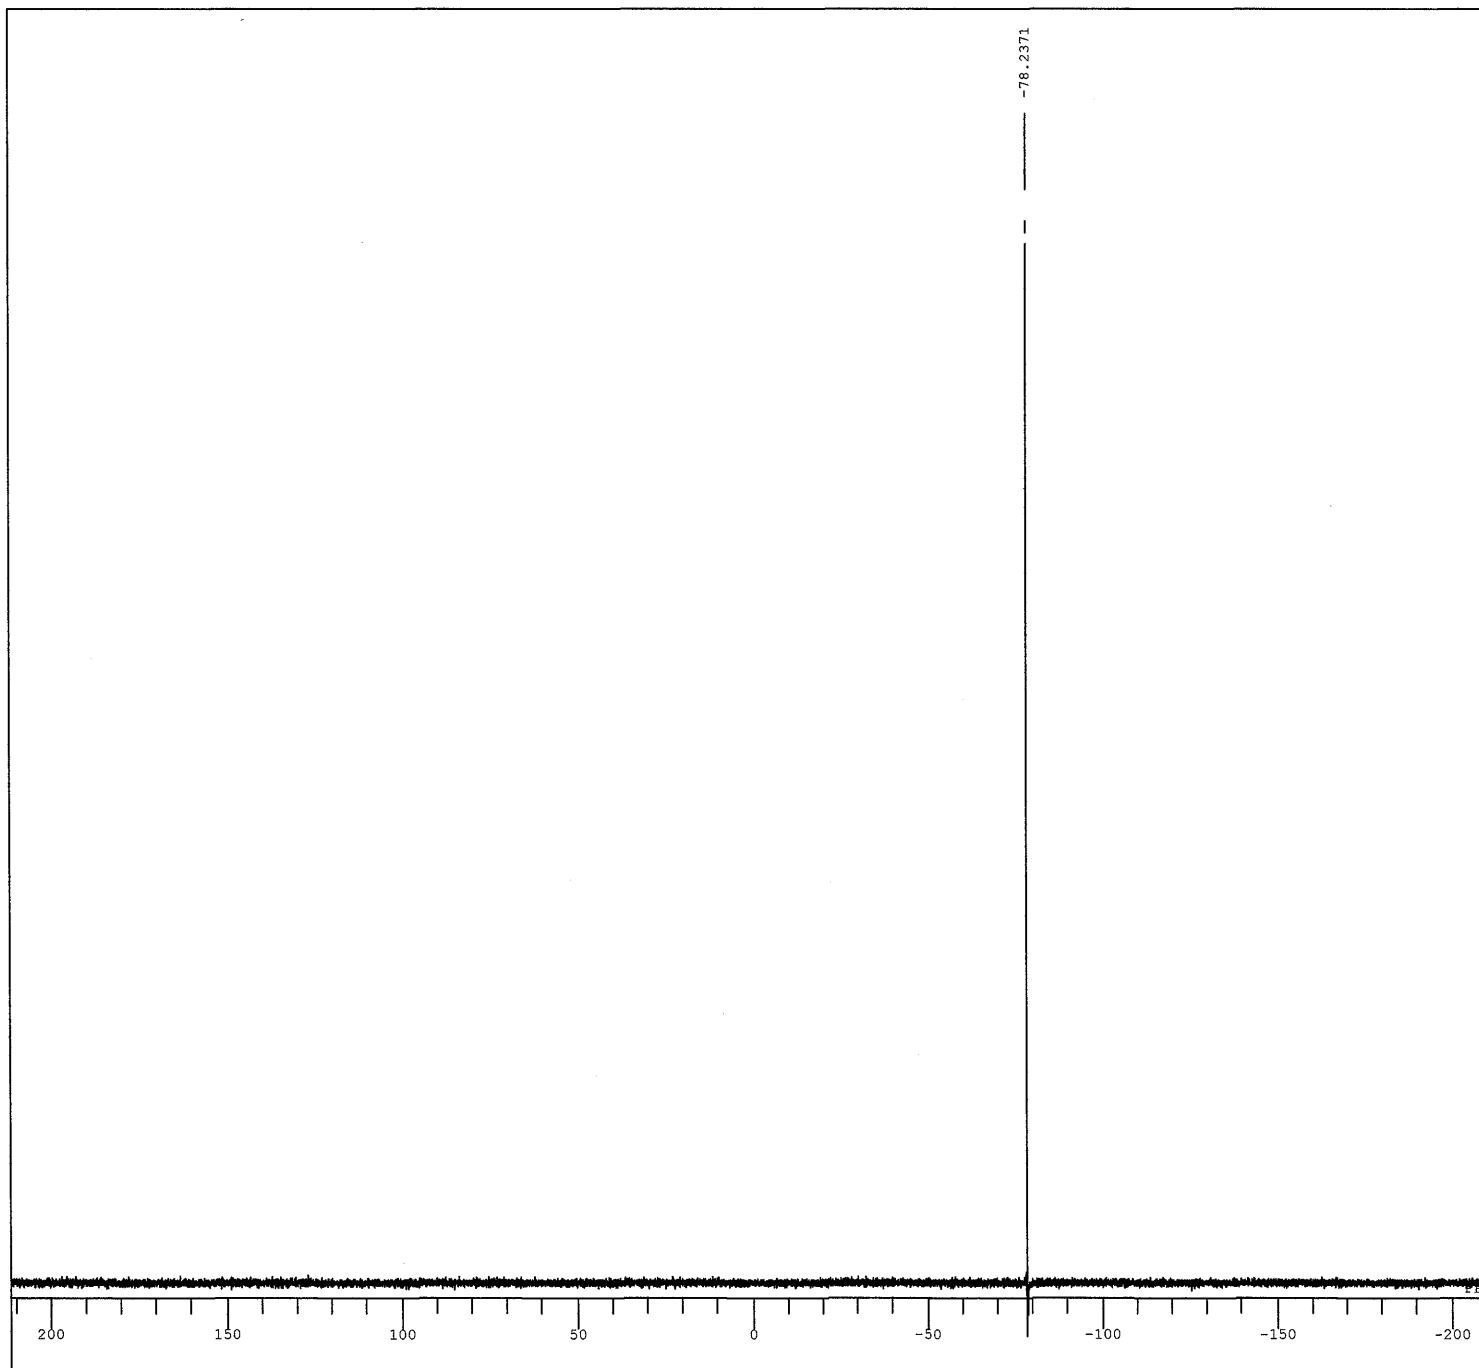

DFILE ozawa07-025 19F.jdf  
COMNT yne-tert, OH  
DATIM 21-03-2015 11:41:16  
OBNUC 19F  
EXMOD proton.jxp  
OBFREQ 368.64 MHz  
OBSETE 7.63 KHz  
OBFIN 2.85 Hz  
POINT 16384  
FREQU 195312.50 Hz  
SCANS 4  
ACQTM 0.0839 sec  
PD 5.0000 sec  
PW1 3.90 usec  
IRNUC 19F  
CTEMP 25.1 c  
SLVNT CDCL3  
EXREF -164.90 ppm  
BF 0.12 Hz  
RGAIN 50

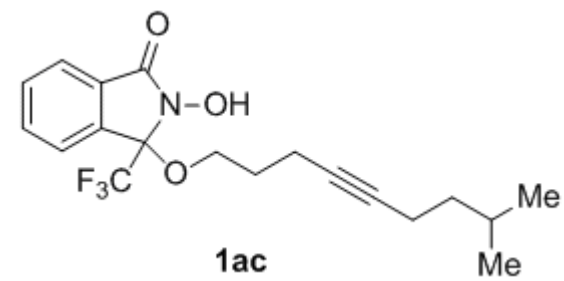

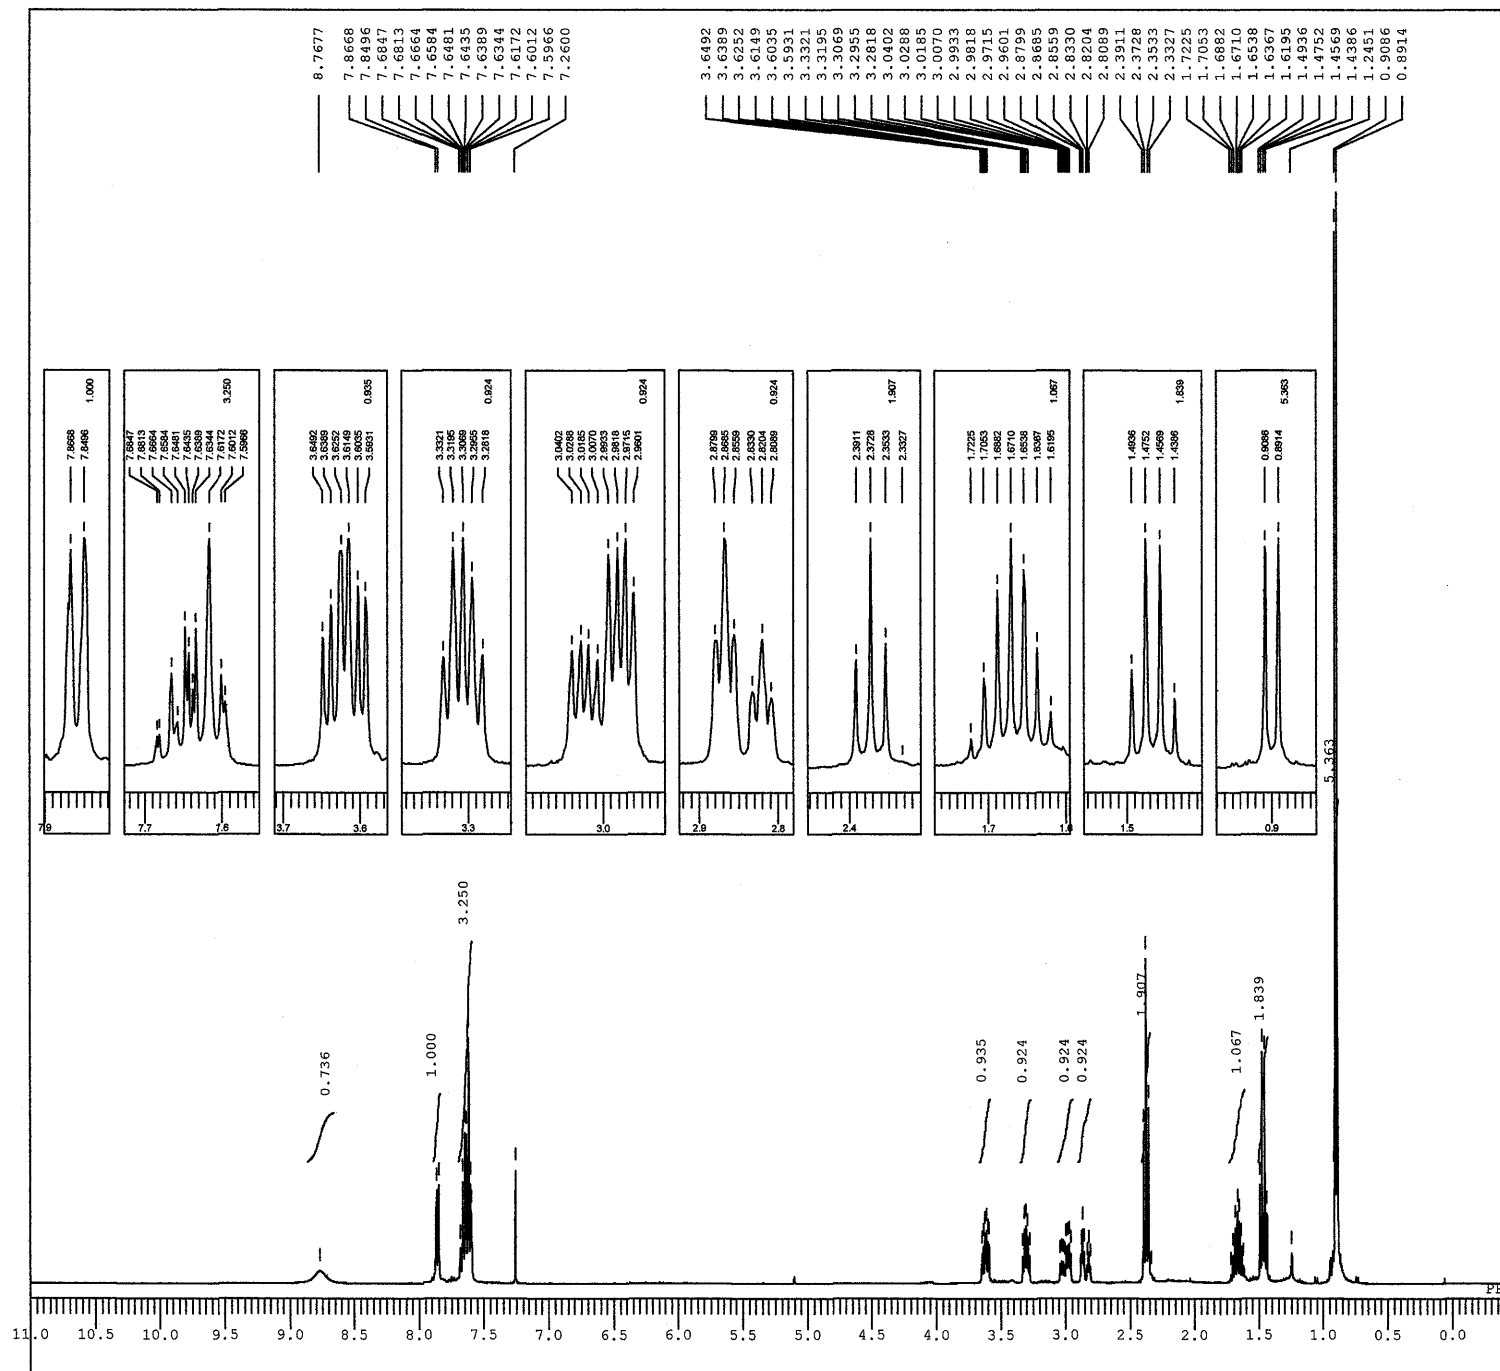

DFILE ozawa07-004 1H.jdf  
 COMNT yne-tert, [0]  
 DATIM 21-03-2015 07:31:59  
 OBNUC 1H  
 EXMOD proton.jxp  
 OBFREQ 391.78 MHz  
 OBSSET 8.51 KHz  
 OBFIN 3.34 Hz  
 POINT 16384  
 FREQU 7348.62 Hz  
 SCANS 4  
 ACQTM 2.2295 sec  
 PD 5.0000 sec  
 PW1 4.99 usec  
 IRNUC 1H  
 CTEMP 25.0 c  
 SLVNT CDCL3  
 EXREF 7.26 ppm  
 BF 0.12 Hz  
 RGAIN 32

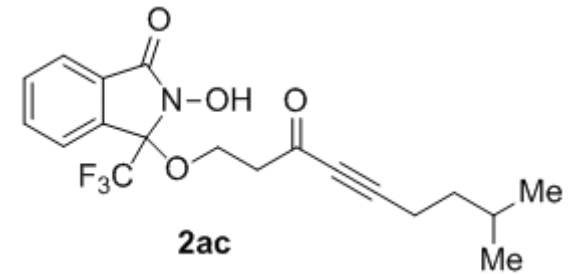

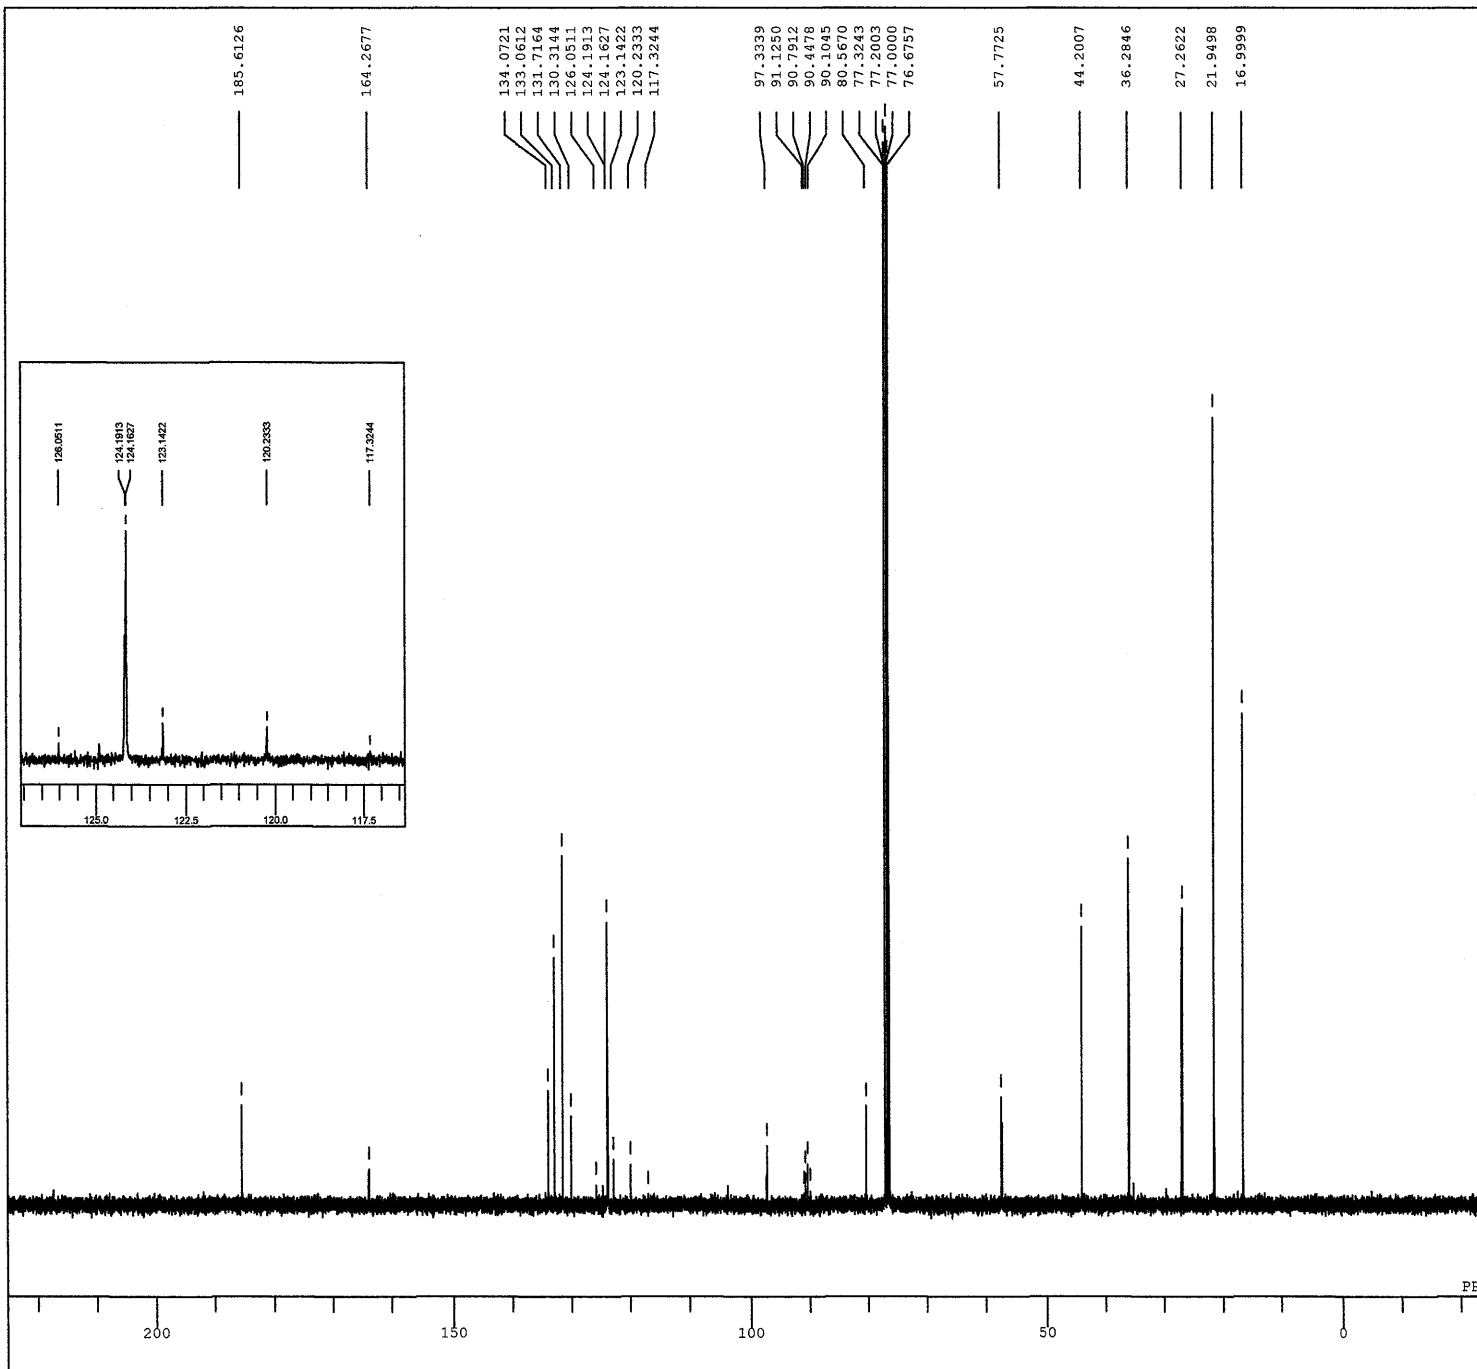

```

DFILE ozawa07-004_13c.jdf
COMNT yne-tert, [0]
DATIM 21-03-2015 07:33:01
OBNUC 13C
EXMOD carbon.jxp
OBFREQ 98.52 MHz
OBSSET 4.64 KHz
OBSFIN 8.74 Hz
POINT 32767
FREQU 30788.18 Hz
SCANS 916
ACQTM 1.0643 sec
PD 2.0000 sec
PW1 3.16 usec
IRNUC 1H
CTEMP 25.3 c
SLVNT CDCL3
EKREF 77.00 ppm
BF 0.12 Hz
RGAIN 60
    
```

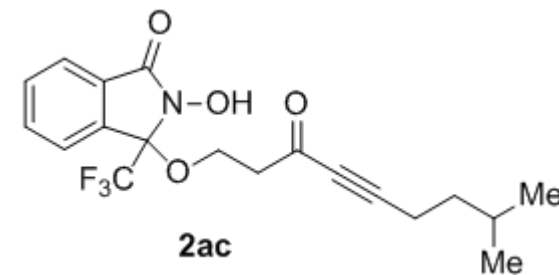

yne-tert, [0]

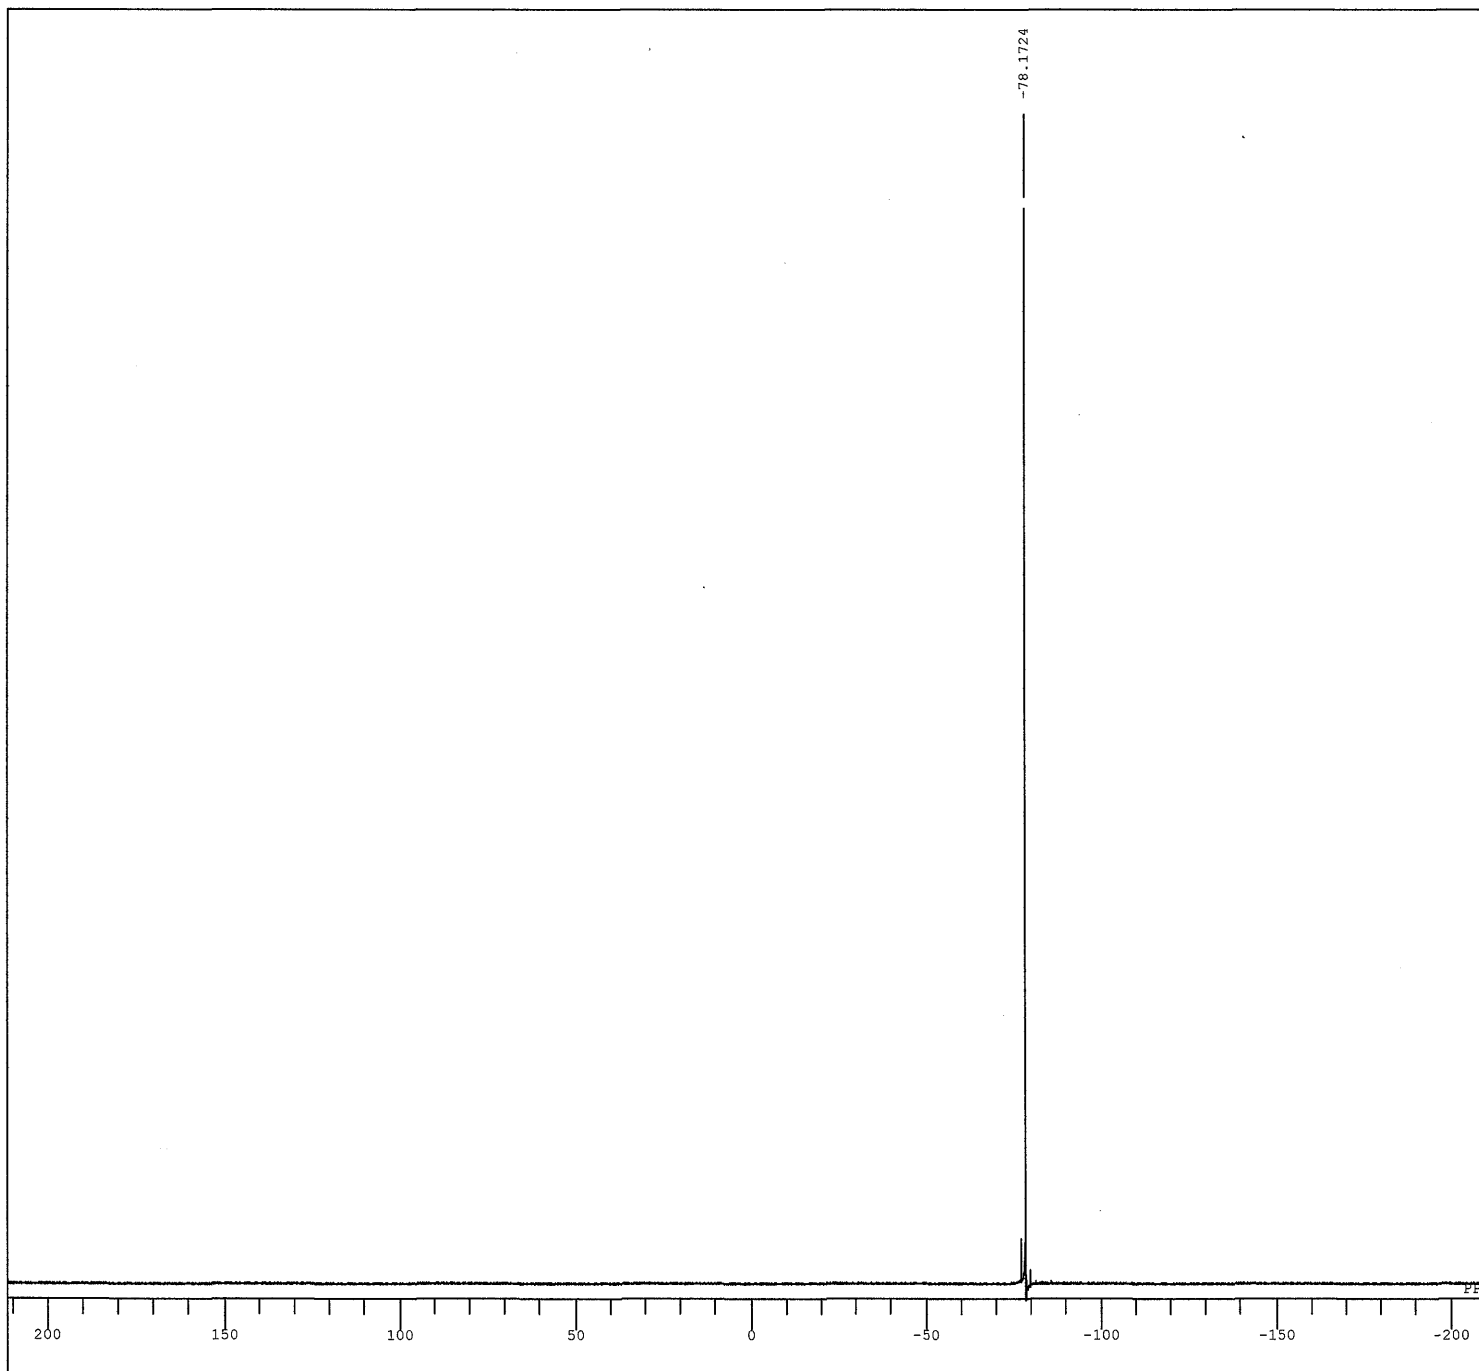

DFILE ozawa07-004\_19F.jdf  
COMNT yne-tert, [0]  
DATIM 21-03-2015 08:21:33  
OBNUC 19F  
EXMOD proton.jxp  
OBFRQ 368.64 MHz  
OBSET 7.63 KHz  
OBFIN 2.85 Hz  
POINT 16384  
FREQU 195312.50 Hz  
SCANS 4  
ACQTM 0.0839 sec  
PD 5.0000 sec  
PW1 3.90 usec  
IRNUC 19F  
CTEMP 25.2 c  
SIVNT CDCL3  
EXREF -164.90 ppm  
BF 0.12 Hz  
RGAIN 50

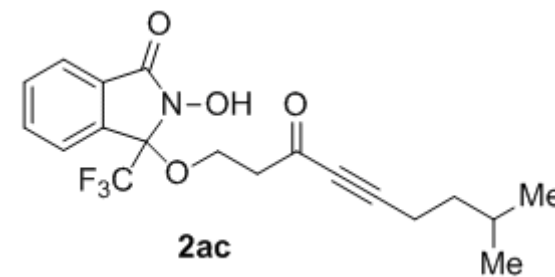

thiophene, PMB

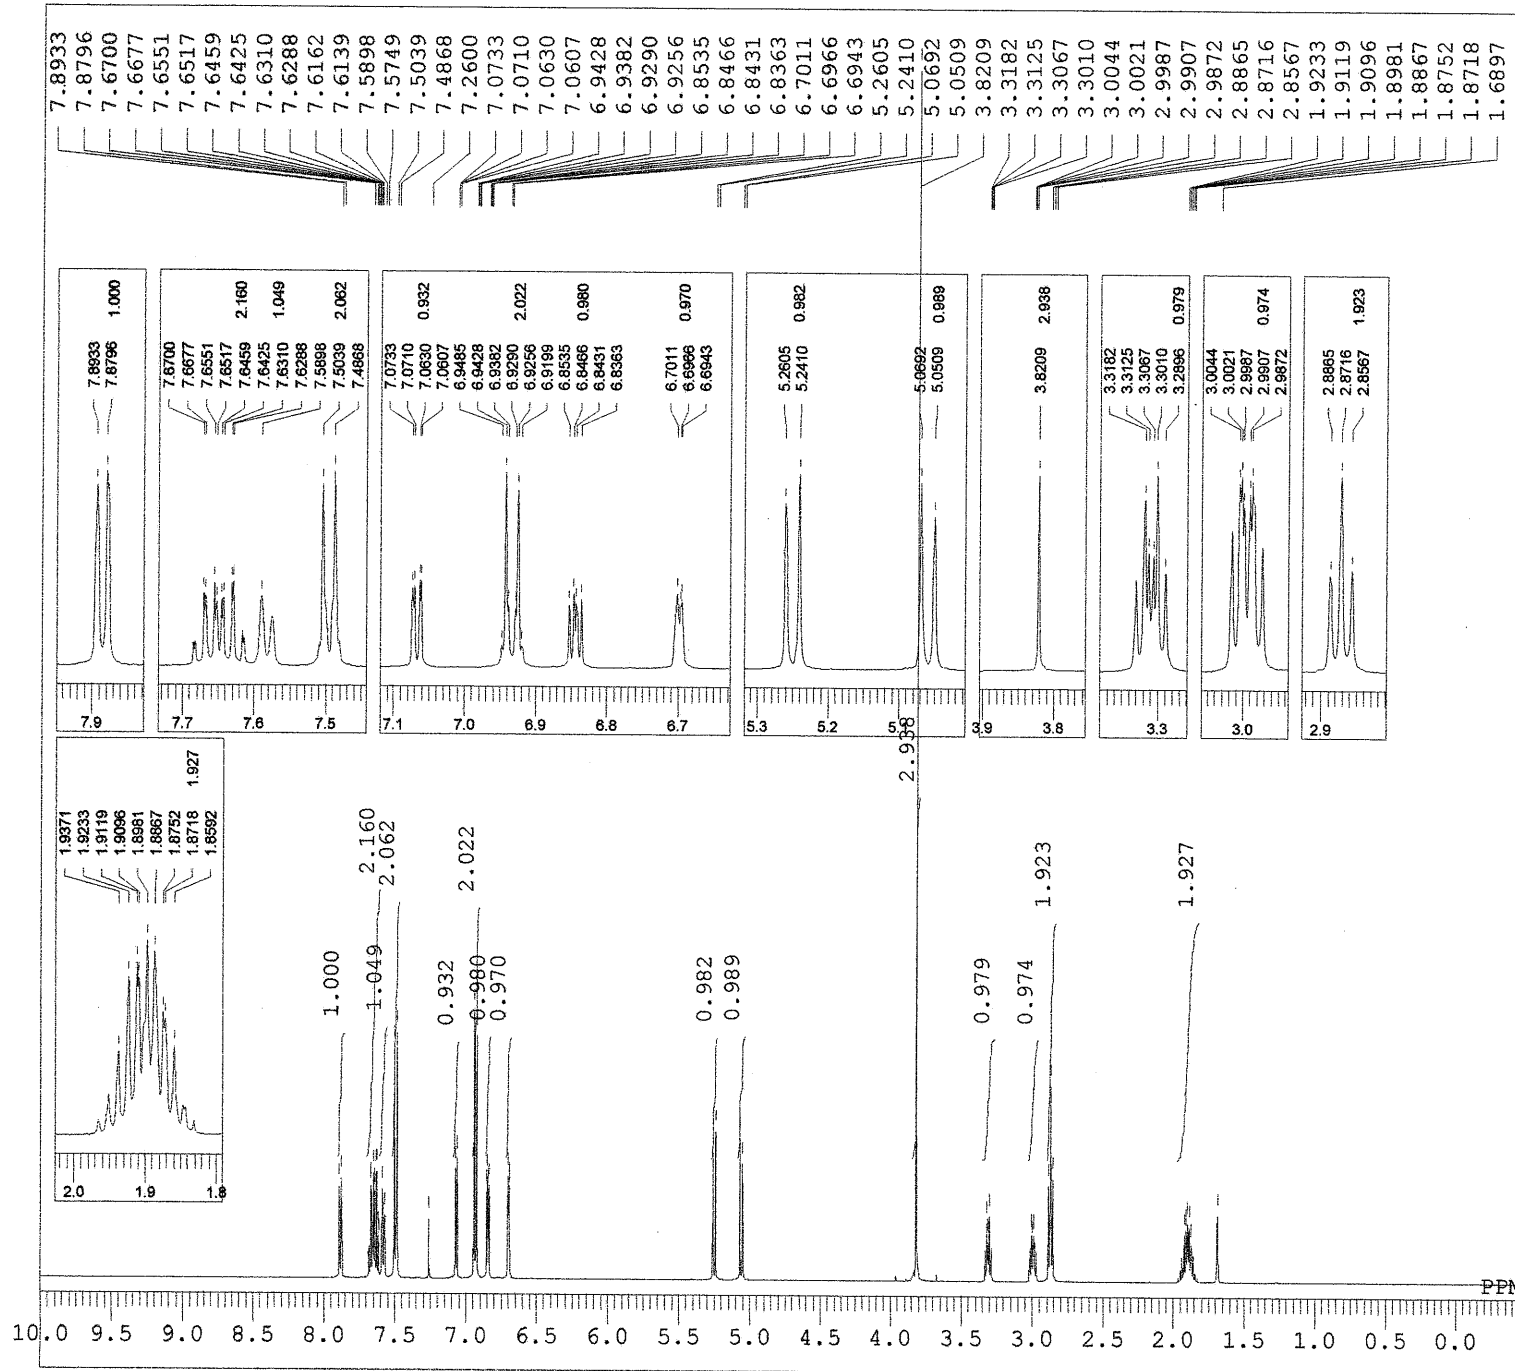

```

DFILE  ozawa05-046_1H.als
COMNT  thiophene, PMB
DATIM  2014-08-15 12:56:25
OBNUC  1H
EXMOD  proton.jxp
OBFRQ  500.16 MHz
OBSET  2.41 KHz
OBFIN  6.01 Hz
POINT  13107
FREQU  7507.51 Hz
SCANS  4
ACQTM  1.7459 sec
PD      5.0000 sec
PW1     5.55 usec
IRNUC  1H
CTEMP  26.2 c
SLVNT  CDCL3
EXREF  7.26 ppm
BF      0.12 Hz
RGAIN  30
    
```

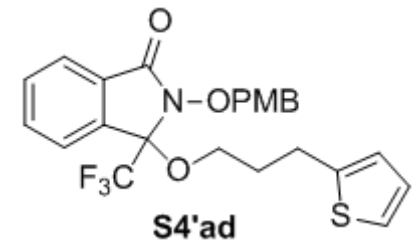



thiophene, PMB

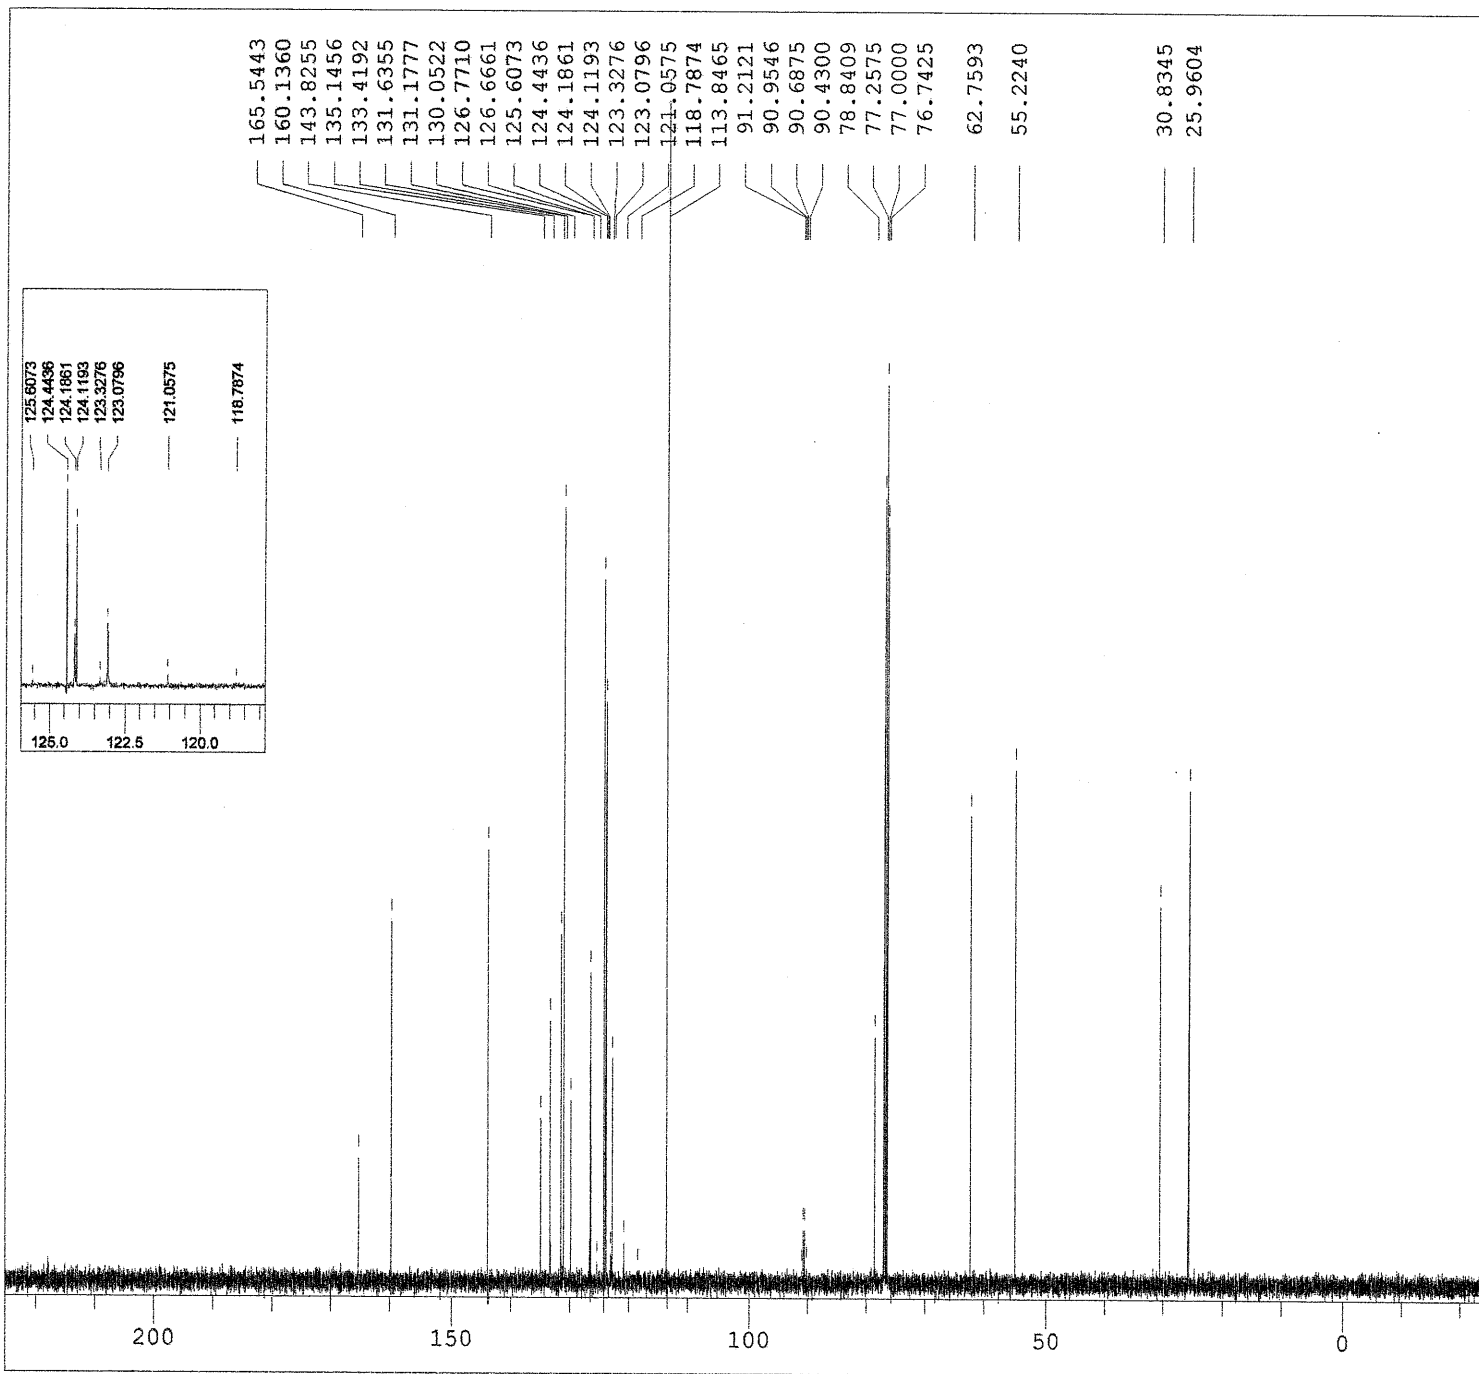

DFILE ozawa05-046\_13C.jdf  
COMNT thiophene, PMB  
DATIM 2014-08-15 12:57:28  
OBNUC 13C  
EXMOD carbon.jxp  
OBFRQ 125.77 MHz  
OBSET 7.87 KHz  
OBFIN 4.21 Hz  
POINT 32767  
FREQU 39308.18 Hz  
SCANS 180  
ACQTM 0.8336 sec  
PD 3.0000 sec  
PW1 3.40 usec  
IRNUC 1H  
CTEMP 26.4 c  
SLVNT CDCL3  
EXREF 77.00 ppm  
BF 0.12 Hz  
RGAIN 60

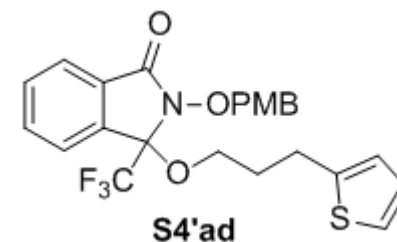

thiophene, PMB

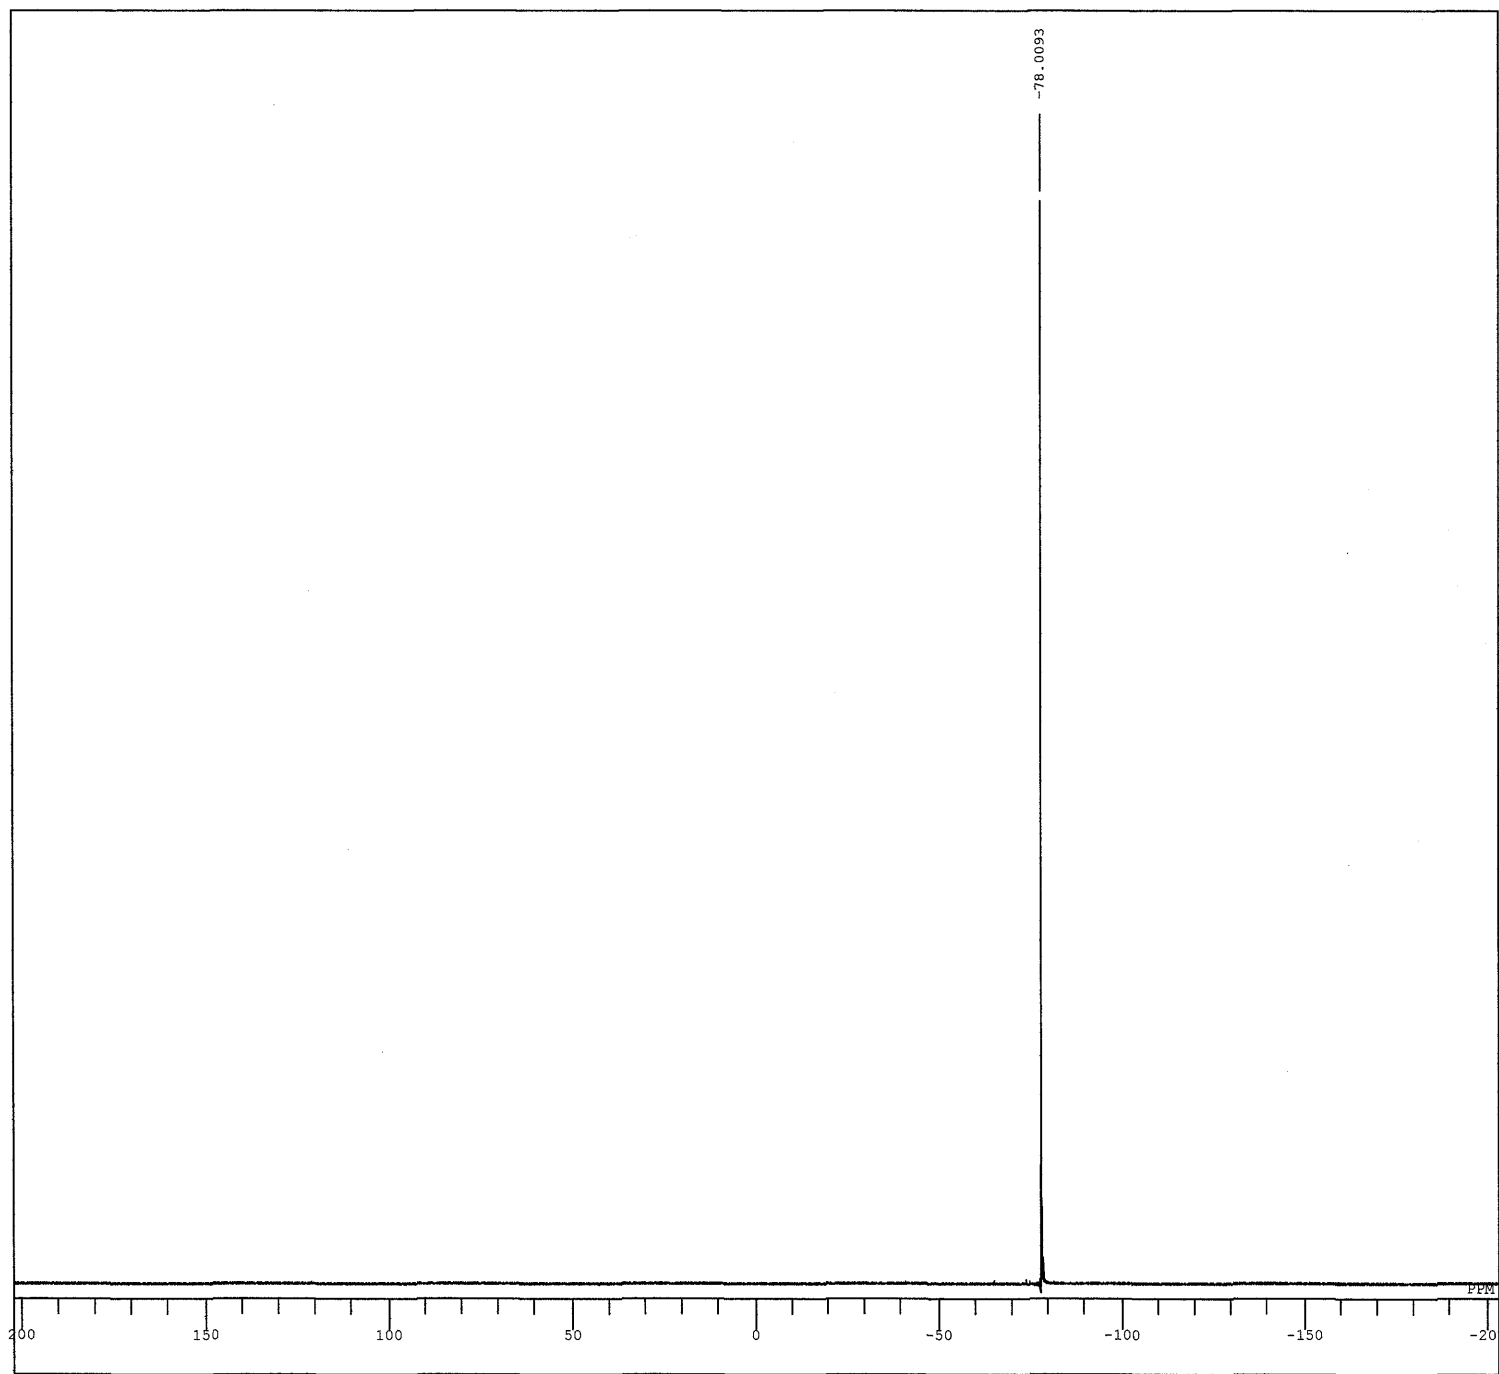

DFILE ozawa05-046\_19F.jdf  
COMNT thiophene, PMB  
DATIM 15-08-2014 13:54:52  
OBNUC 19F  
EXMOD proton.jxp  
OBFRO 368.64 MHz  
OBSET 7.63 KHz  
OBFIN 2.85 Hz  
POINT 16384  
FREQU 186567.17 Hz  
SCANS 4  
ACQTM 0.0878 sec  
ED 5.0000 sec  
FW1 3.90 usec  
IRNUC 19F  
CTEMP 24.2 c  
SLVNT CDCL3  
EXREF -164.90 ppm  
BF 0.12 Hz  
RGAIN 50

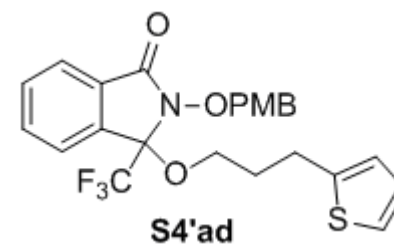

thiophene, OH

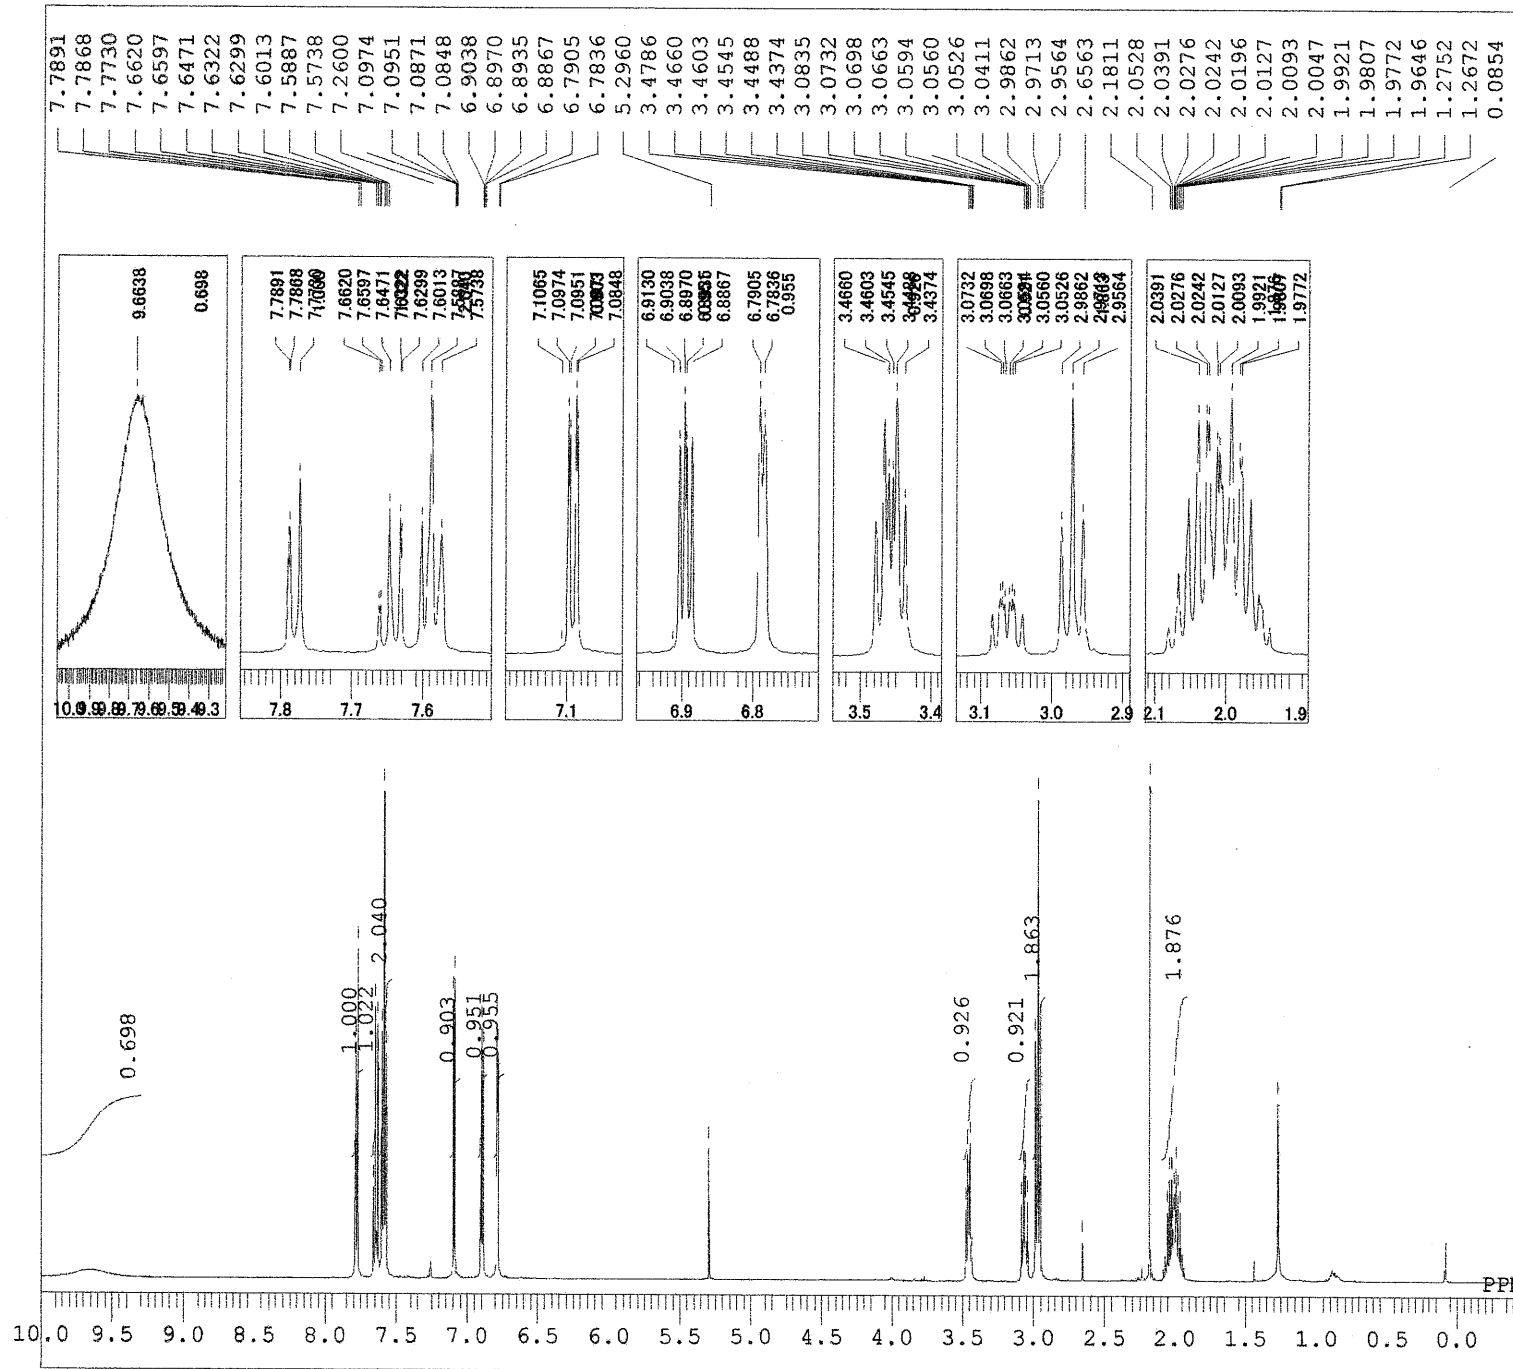

DFILE ozawa05-076\_1H.jdf  
COMNT thiophene, OH  
DATIM 2014-07-03 17:14:10  
OBNUC 1H  
EXMOD proton.jxp  
OBFRQ 500.16 MHz  
OBSET 2.41 KHz  
OBFIN 6.01 Hz  
POINT 16384  
FREQU 9384.38 Hz  
SCANS 4  
ACQTM 1.7459 sec  
PD 5.0000 sec  
PW1 5.55 usec  
IRNUC 1H  
CTEMP 25.8 c  
SLVNT CDCL3  
EXREF 7.26 ppm  
BF 0.12 Hz  
RGAIN 34

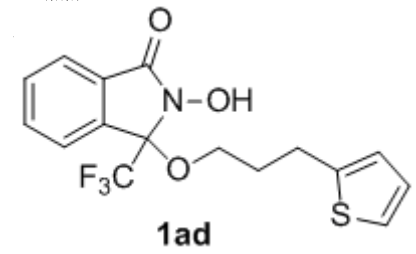



thiophene, OH

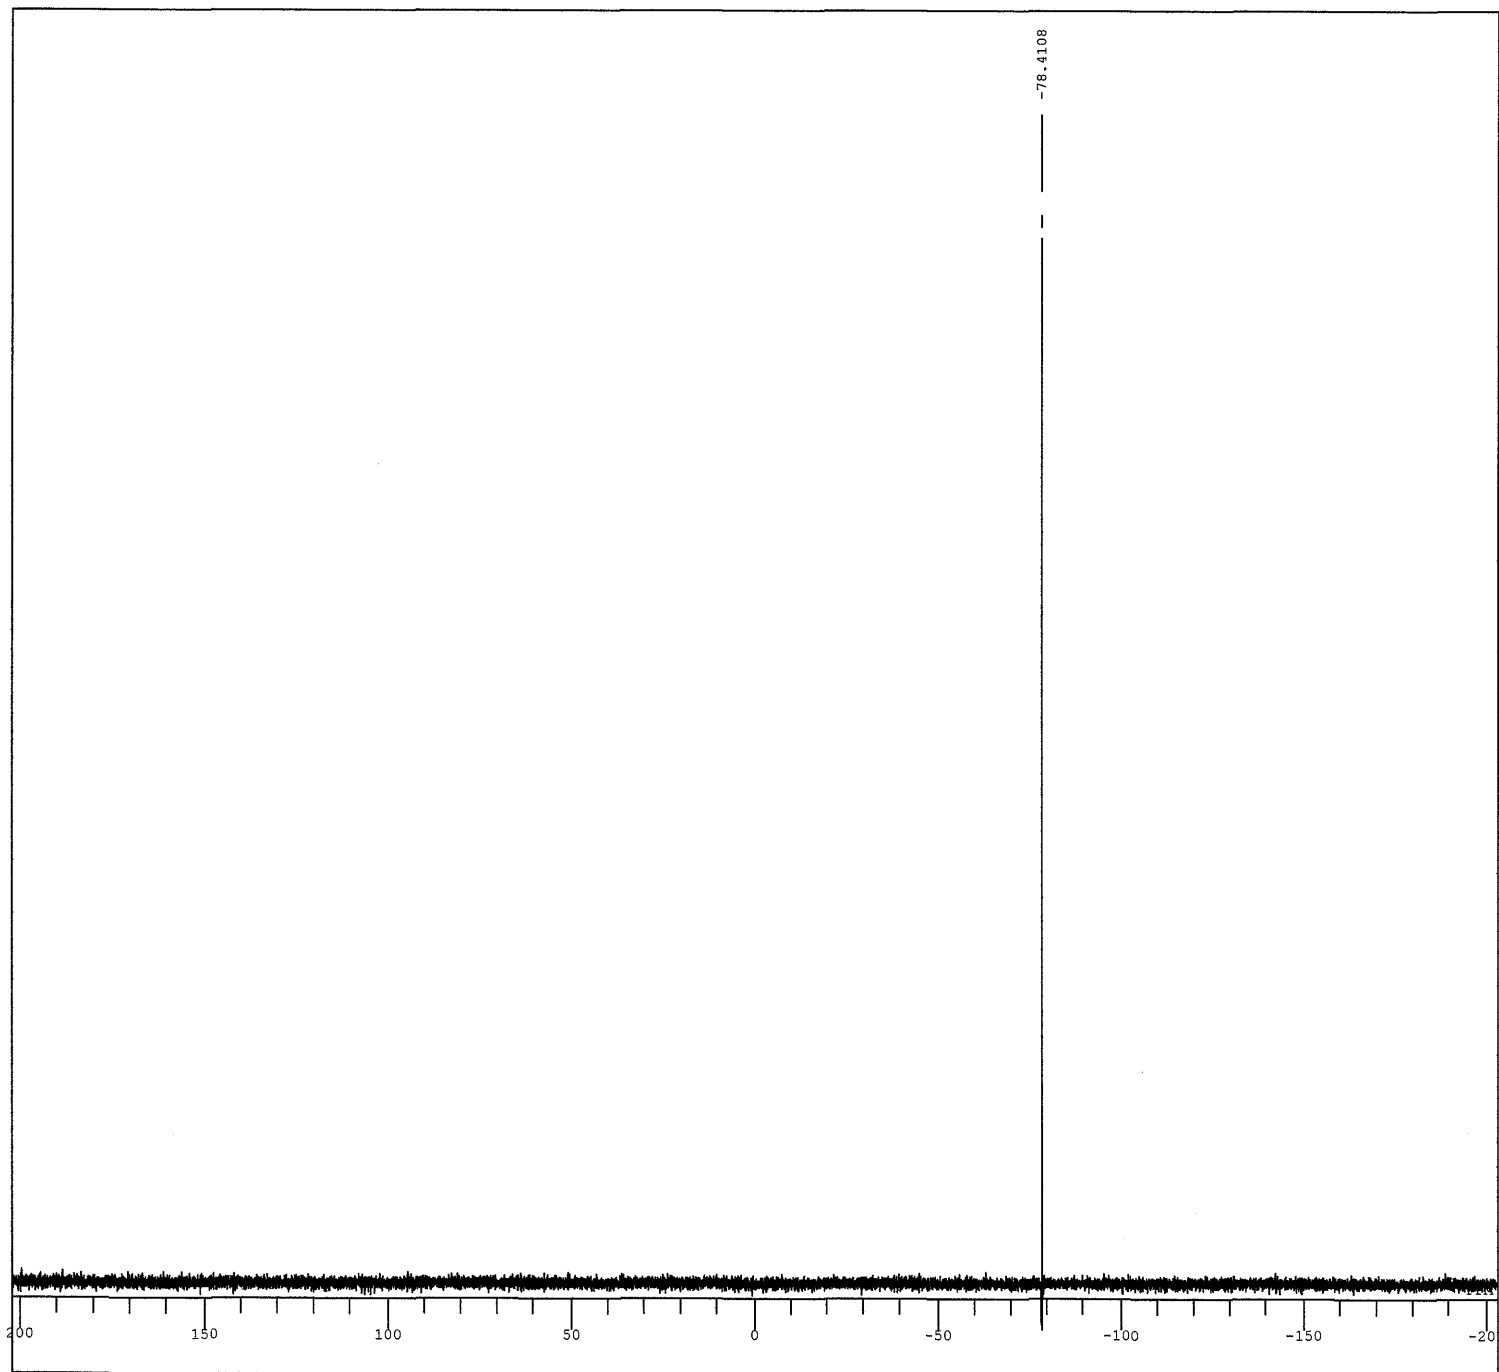

DFILE ozawa05-076 19F.jdf  
COMNT thiophene, OH  
DATIM 15-08-2014 20:00:49  
OBNUC 19F  
EXMOD proton.jxp  
OBFRO 368.64 MHz  
OBSFT 7.63 KHz  
OBFIN 2.85 Hz  
POINT 16384  
FREQU 186567.17 Hz  
SCANS 4  
ACQTM 0.0878 sec  
PD 5.0000 sec  
PWL 3.90 usec  
IRNUC 19F  
CTEMP 24.5 c  
SLVNT CDCL3  
EXREF -164.90 ppm  
BF 0.12 Hz  
RGAIN 48

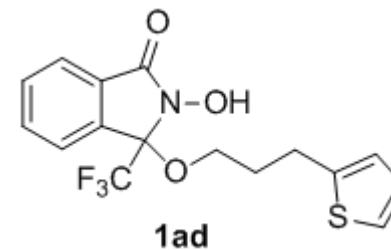

thiophene, [0]

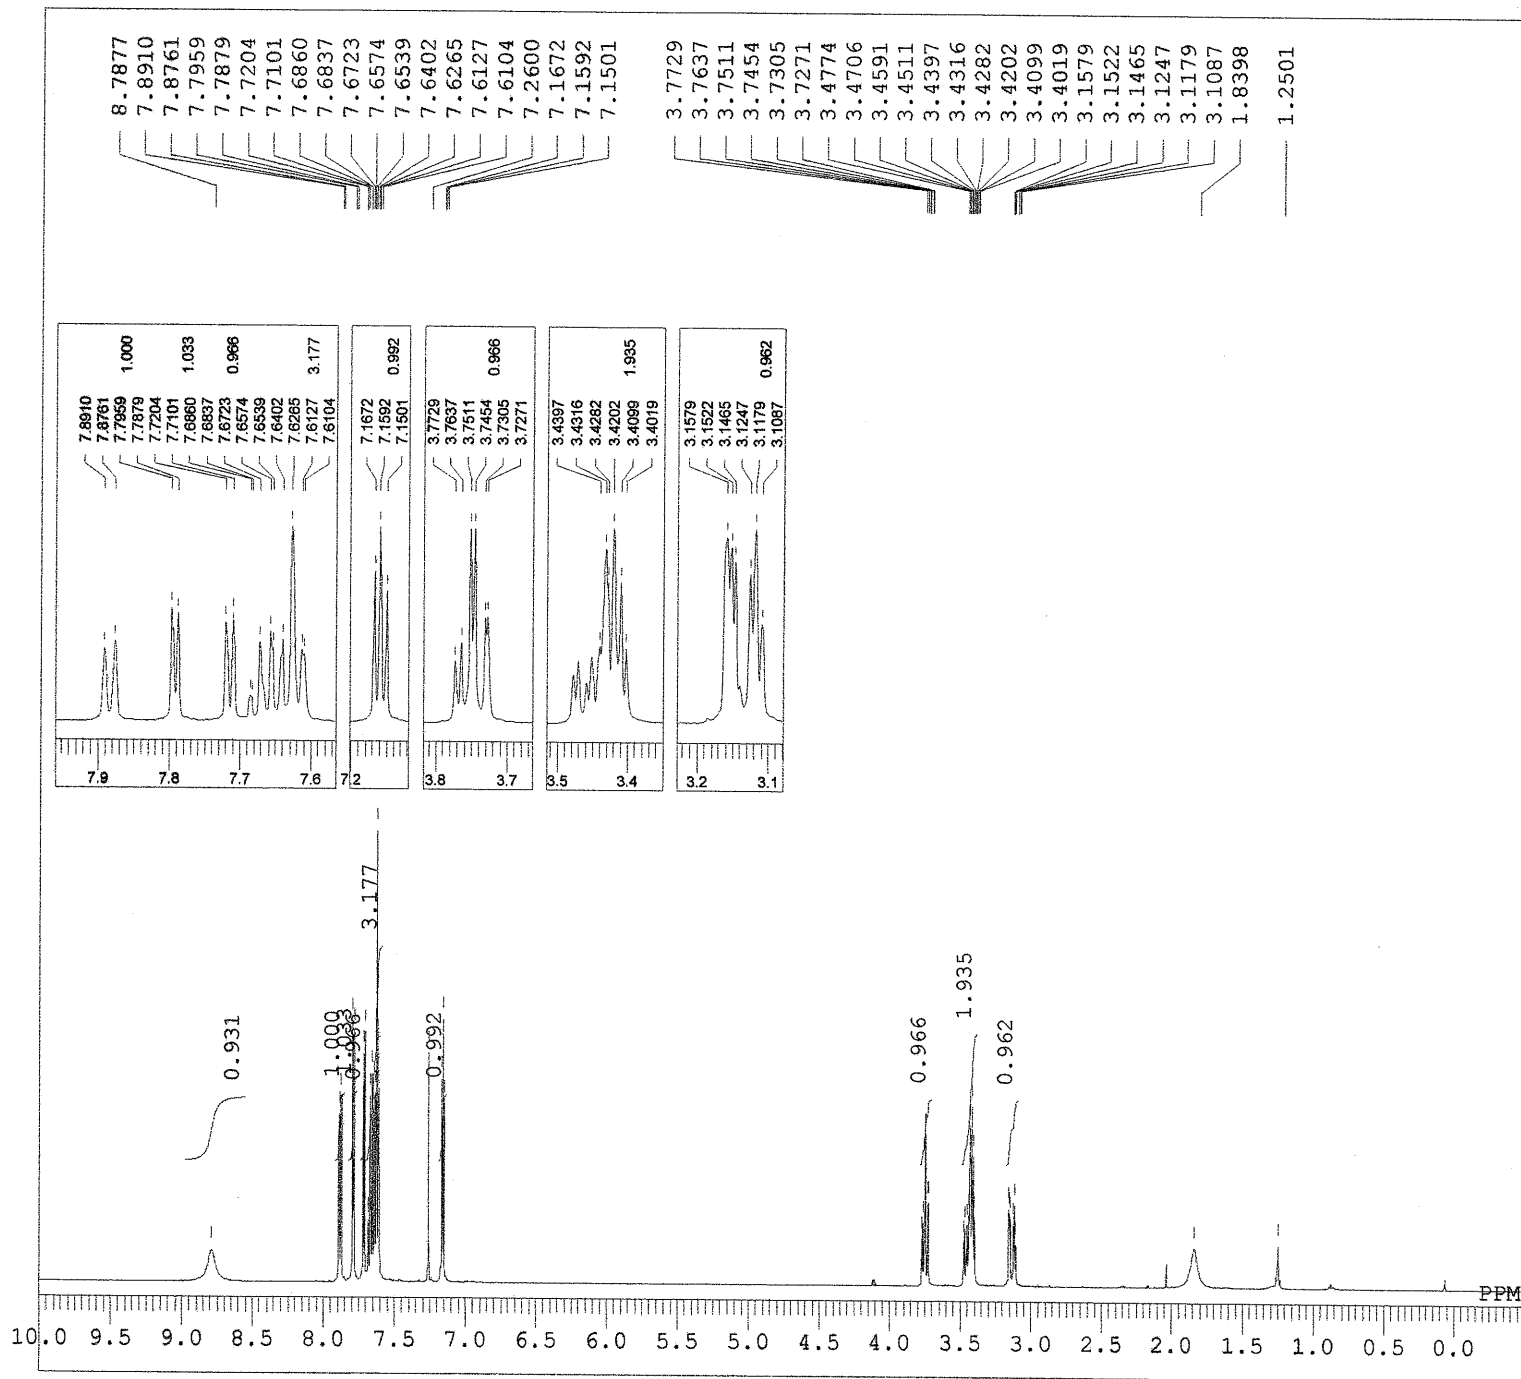

DFILE ozawa05-095\_2\_1H.jdf  
COMNT thiophene, [0]  
DATIM 2014-08-16 15:25:08  
OBNUC 1H  
EXMOD proton.jxp  
OBFRQ 500.16 MHz  
OBSET 2.41 KHz  
OBFIN 6.01 Hz  
POINT 16384  
FREQU 9384.38 Hz  
SCANS 8  
ACQTM 1.7459 sec  
PD 5.0000 sec  
PW1 5.55 usec  
IRNUC 1H  
CTEMP 26.2 c  
SLVNT CDCL3  
EXREF 7.26 ppm  
BF 0.12 Hz  
RGAIN 38

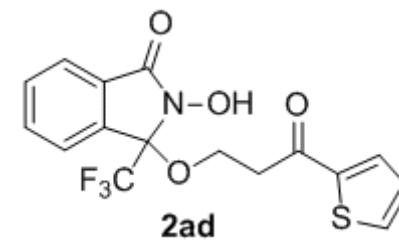

thiophene, [O]

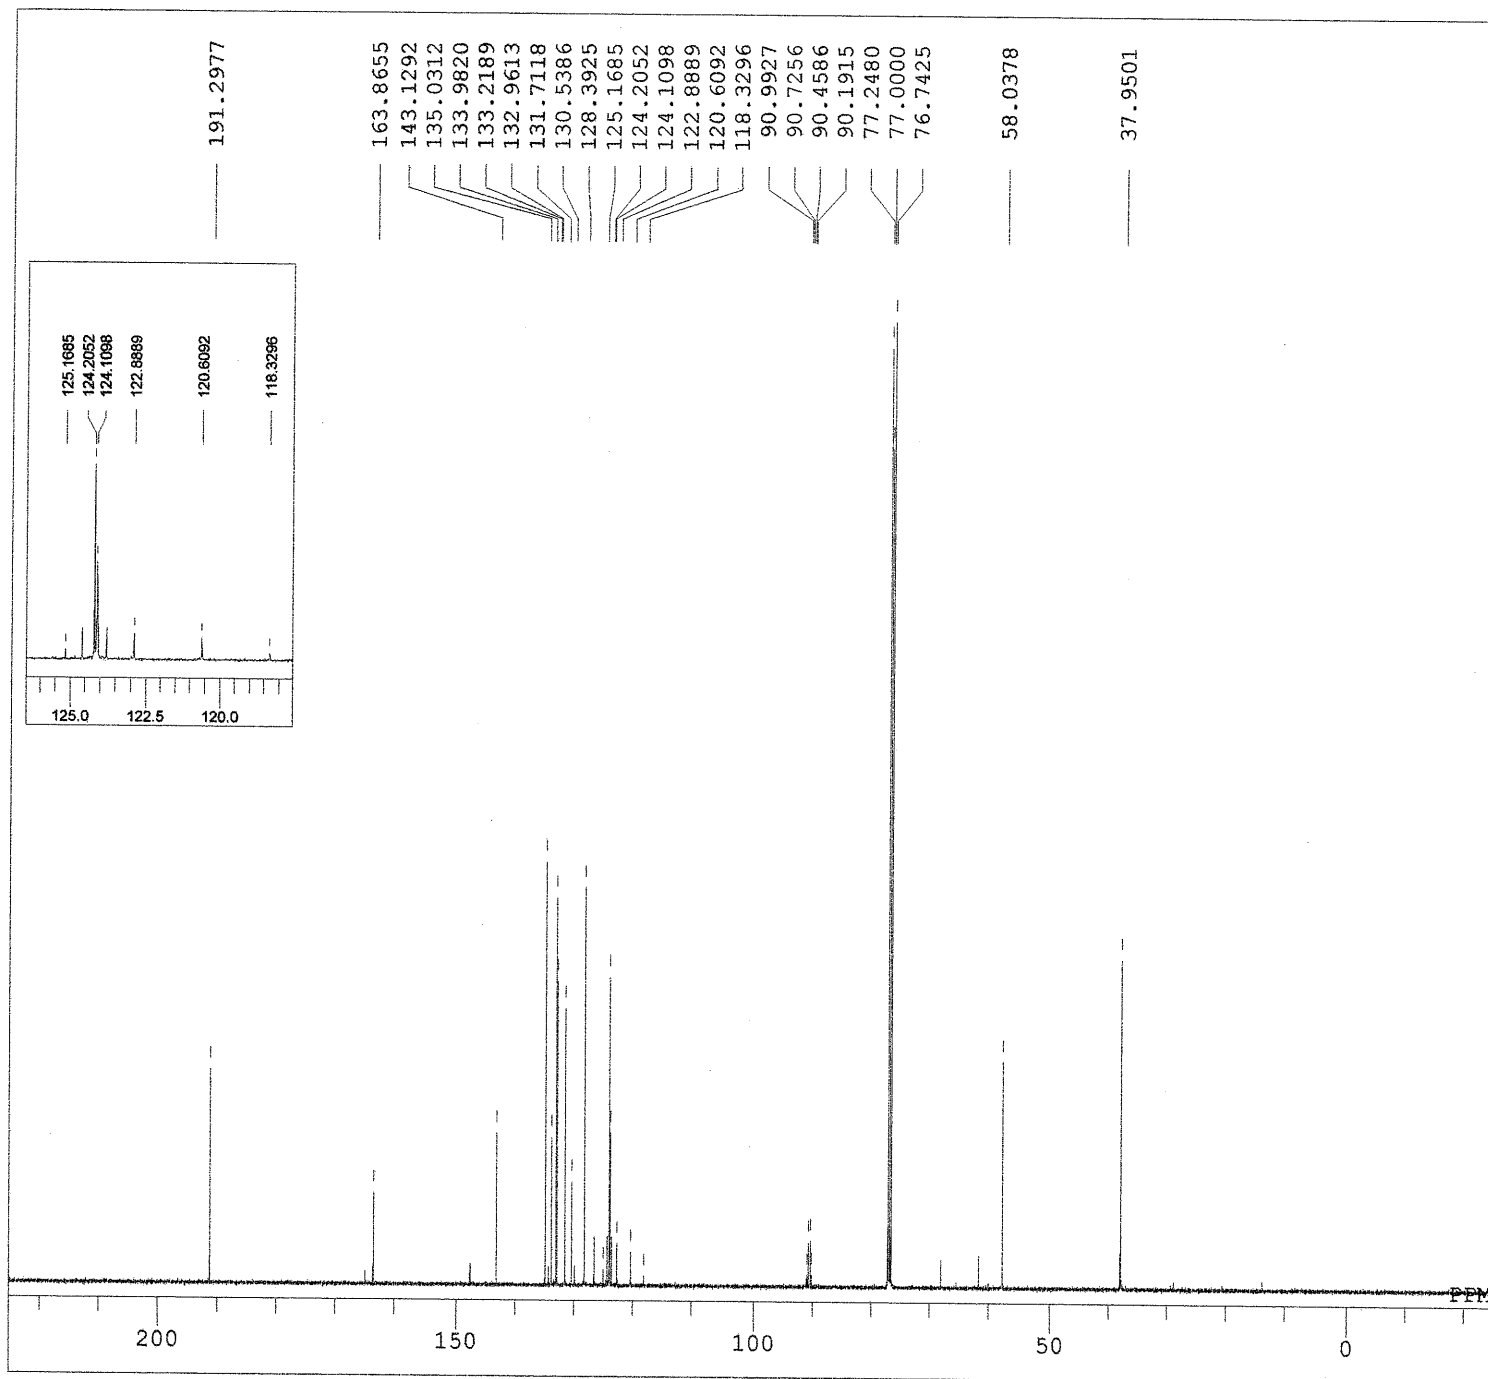

DFILE ozawa05-095\_2\_13C.jdf  
COMNT thiophene, [O]  
DATIM 2014-08-15 22:28:45  
OBNUC 13C  
EXMOD carbon.jxp  
OBFRQ 125.77 MHz  
OBSET 7.87 KHz  
OBFIN 4.21 Hz  
POINT 32767  
FREQU 39308.18 Hz  
SCANS 10000  
ACQTM 0.8336 sec  
PD 3.0000 sec  
PW1 3.40 usec  
IRNUC 1H  
CTEMP 26.6 c  
SLVNT CDCL3  
EXREF 77.00 ppm  
BF 0.12 Hz  
RGAIN 60

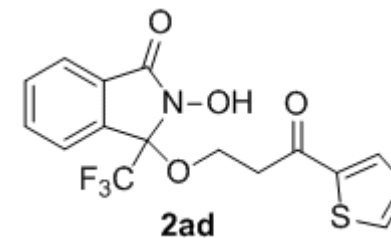

thiophene, [O]

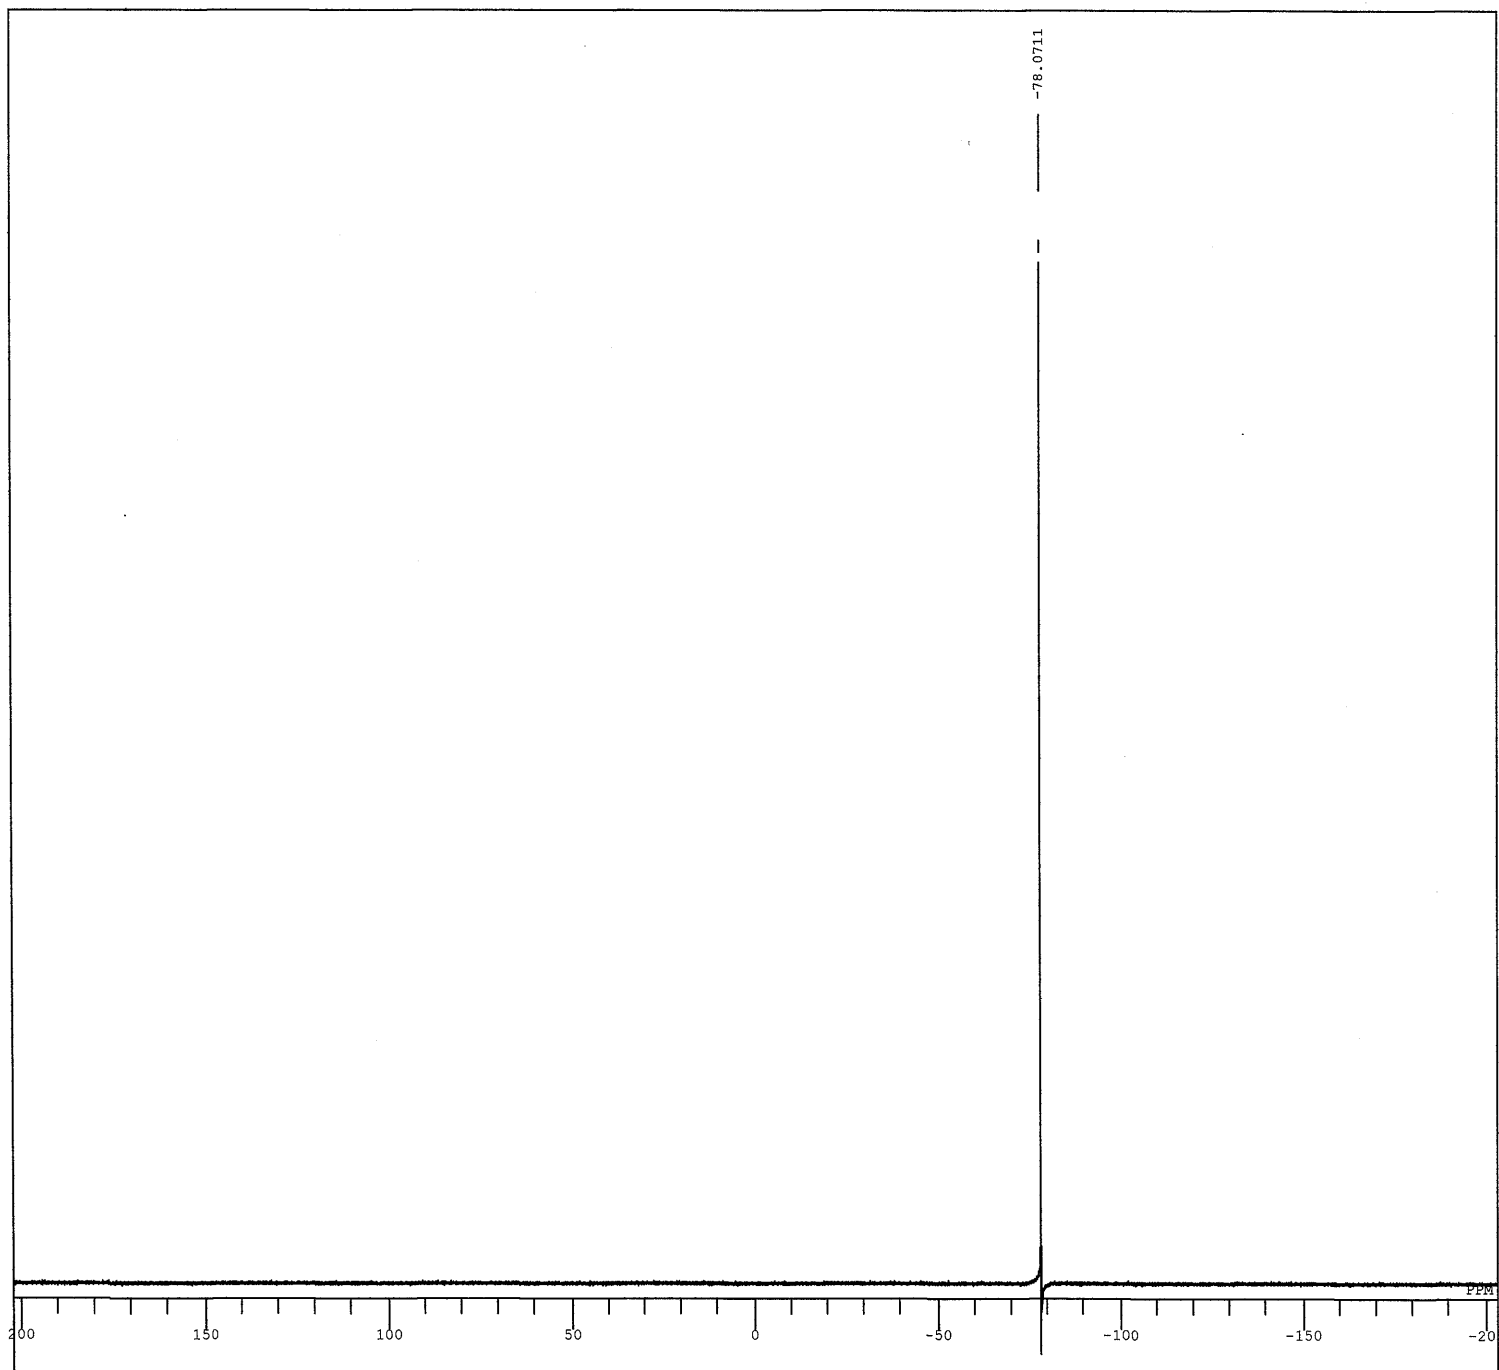

DFILE ozawa05-095 2 19F.jdf  
COMNT thiophene, [O]  
DATIM 07-07-2014 18:32:55  
OBNUC 19F  
EXMOD proton.jxp  
OBFREQ 368.64 MHz  
OBSET 7.63 KHz  
OBFIN 2.85 Hz  
POINT 16384  
FREQU 186567.17 Hz  
SCANS 4  
ACQTM 0.0878 sec  
PD 5.0000 sec  
PW1 3.90 usec  
IRNUC 19F  
CTEMP 24.3 c  
SLVNT CDCL3  
EXREF -164.90 ppm  
BF 0.12 Hz  
RGAIN 50

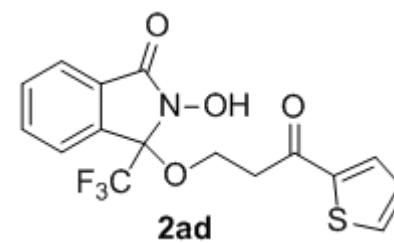



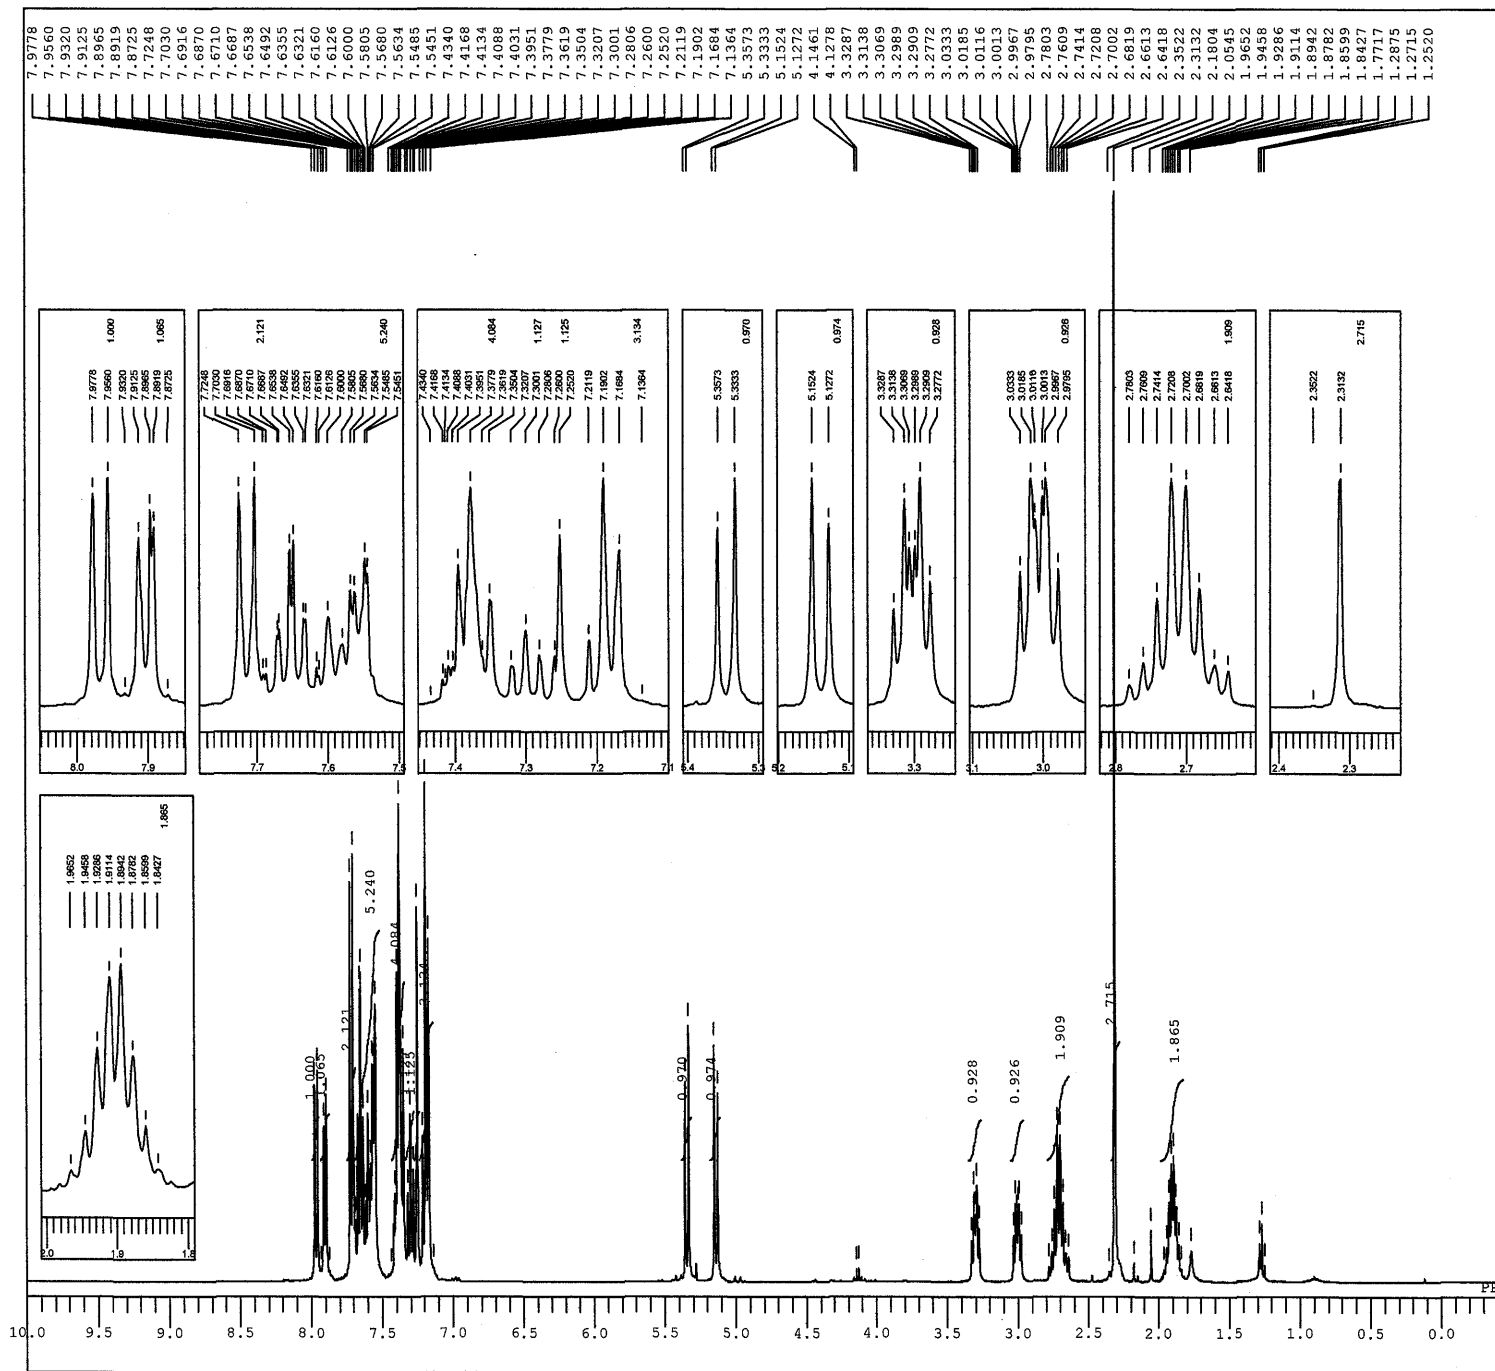

DFILE ozawa05-122 1H.jdf  
 COMNT Ts-indol, Bn  
 DATIM 04-08-2014 16:43:13  
 OBNUC 1H  
 EXMOD proton.jxp  
 OBFRO 391.78 MHz  
 OBSEF 8.51 KHz  
 OBFIN 3.34 Hz  
 POINT 16384  
 FREQU 7348.62 Hz  
 SCANS 4  
 ACQTM 2.2295 sec  
 PD 5.0000 sec  
 FW1 5.25 usec  
 IRNUC 1H  
 CTEMP 24.2 c  
 SILVNT CDCL3  
 EXREF 7.26 ppm  
 BF 0.12 Hz  
 RGAIN 26

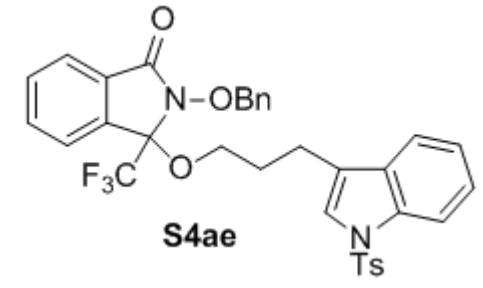

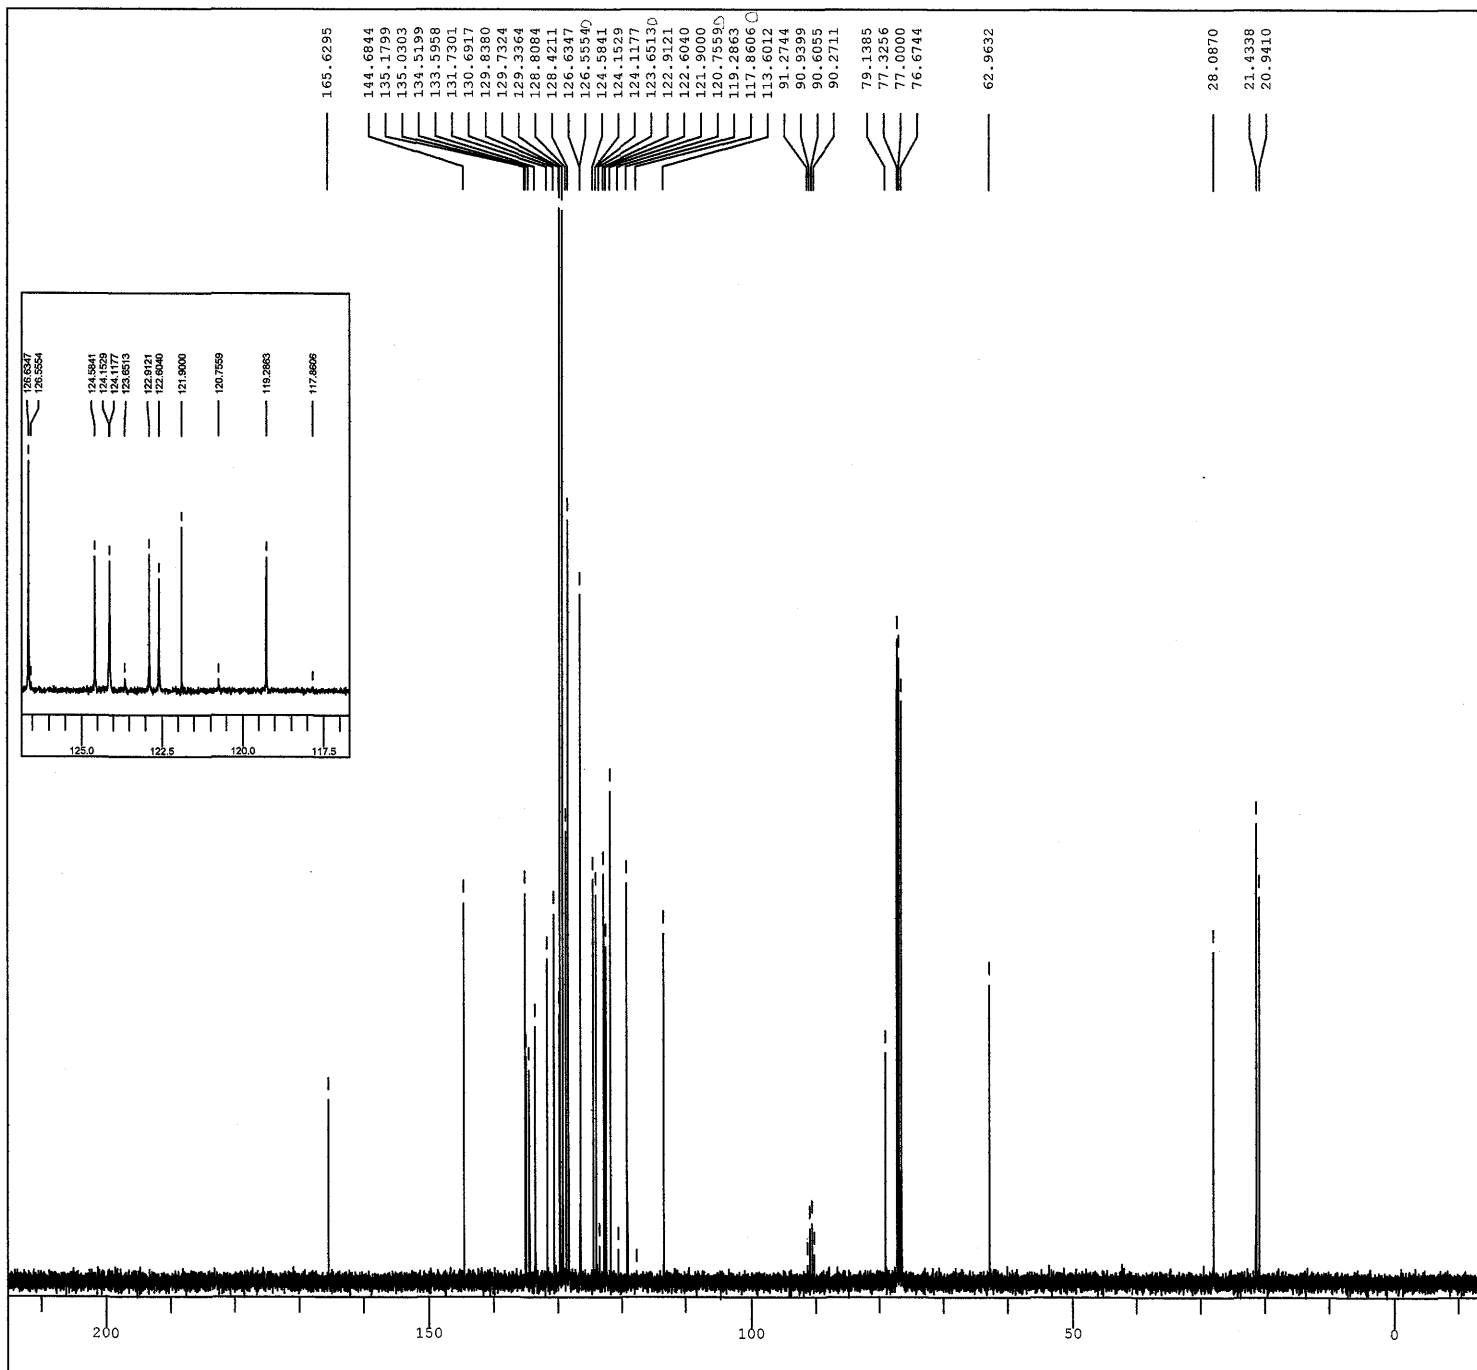

DFILE ozawa05-122\_13C.jdf  
 COMNT Ts-indol, Bn  
 DATIM 04-08-2014 16:44:20  
 OBNUC 13C  
 EXMOD carbon.jxp  
 OBFREQ 98.52 MHz  
 OBSET 4.64 KHz  
 OBFIN 8.74 Hz  
 POINT 32767  
 FREQU 28409.09 Hz  
 SCANS 200  
 ACQTM 1.1534 sec  
 PD 3.0000 sec  
 PW1 3.00 usec  
 IRNUC 1H  
 CTEMP 24.5 c  
 SLVNT CDCL3  
 EXREF 77.00 ppm  
 BF 0.12 Hz  
 RGAIN 60

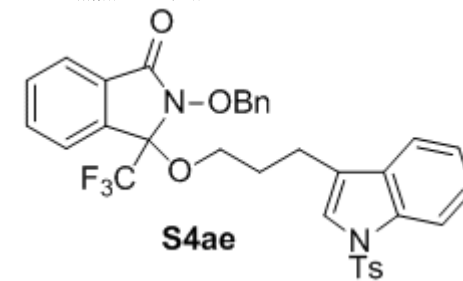

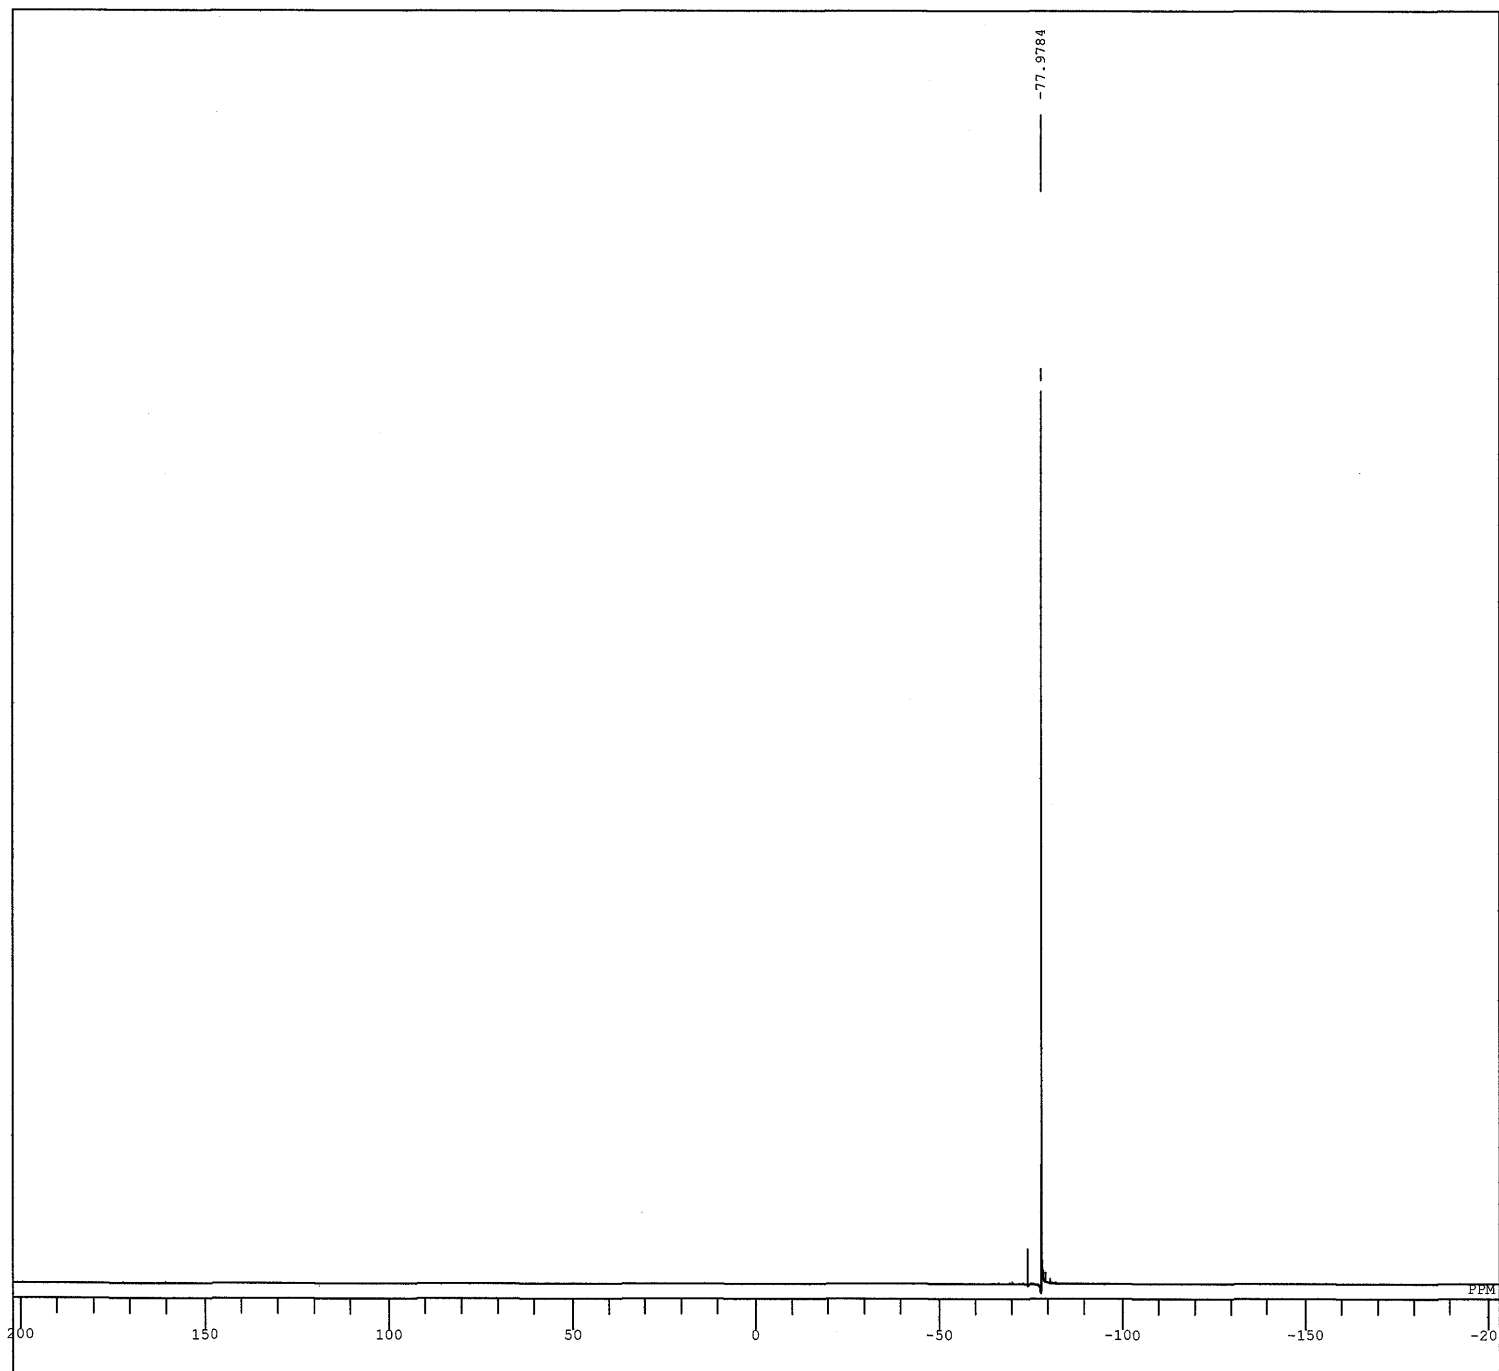

DFILE ozawa05-122\_19F.jdf  
COMNT Ts-indol, Bn  
DATIM 04-08-2014 16:40:51  
OBNUC 19F  
EXMOD proton.jxp  
OBFRQ 368.64 MHz  
OBSET 7.63 KHz  
OBFIN 2.85 Hz  
POINT 16384  
FREQU 186567.17 Hz  
SCANS 4  
ACQIM 0.0878 sec  
PD 5.0000 sec  
FW1 3.90 usec  
IRNUC 19F  
CTEMP 24.2 c  
SLVNT CDCL3  
EXREF -164.90 ppm  
BF 0.12 Hz  
RGAIN 44

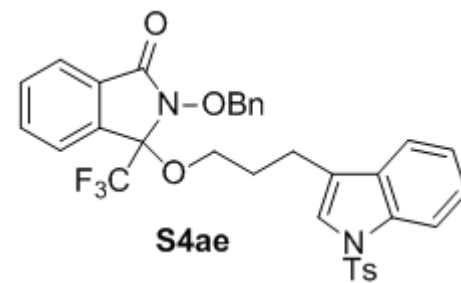

Ts-indole, OH

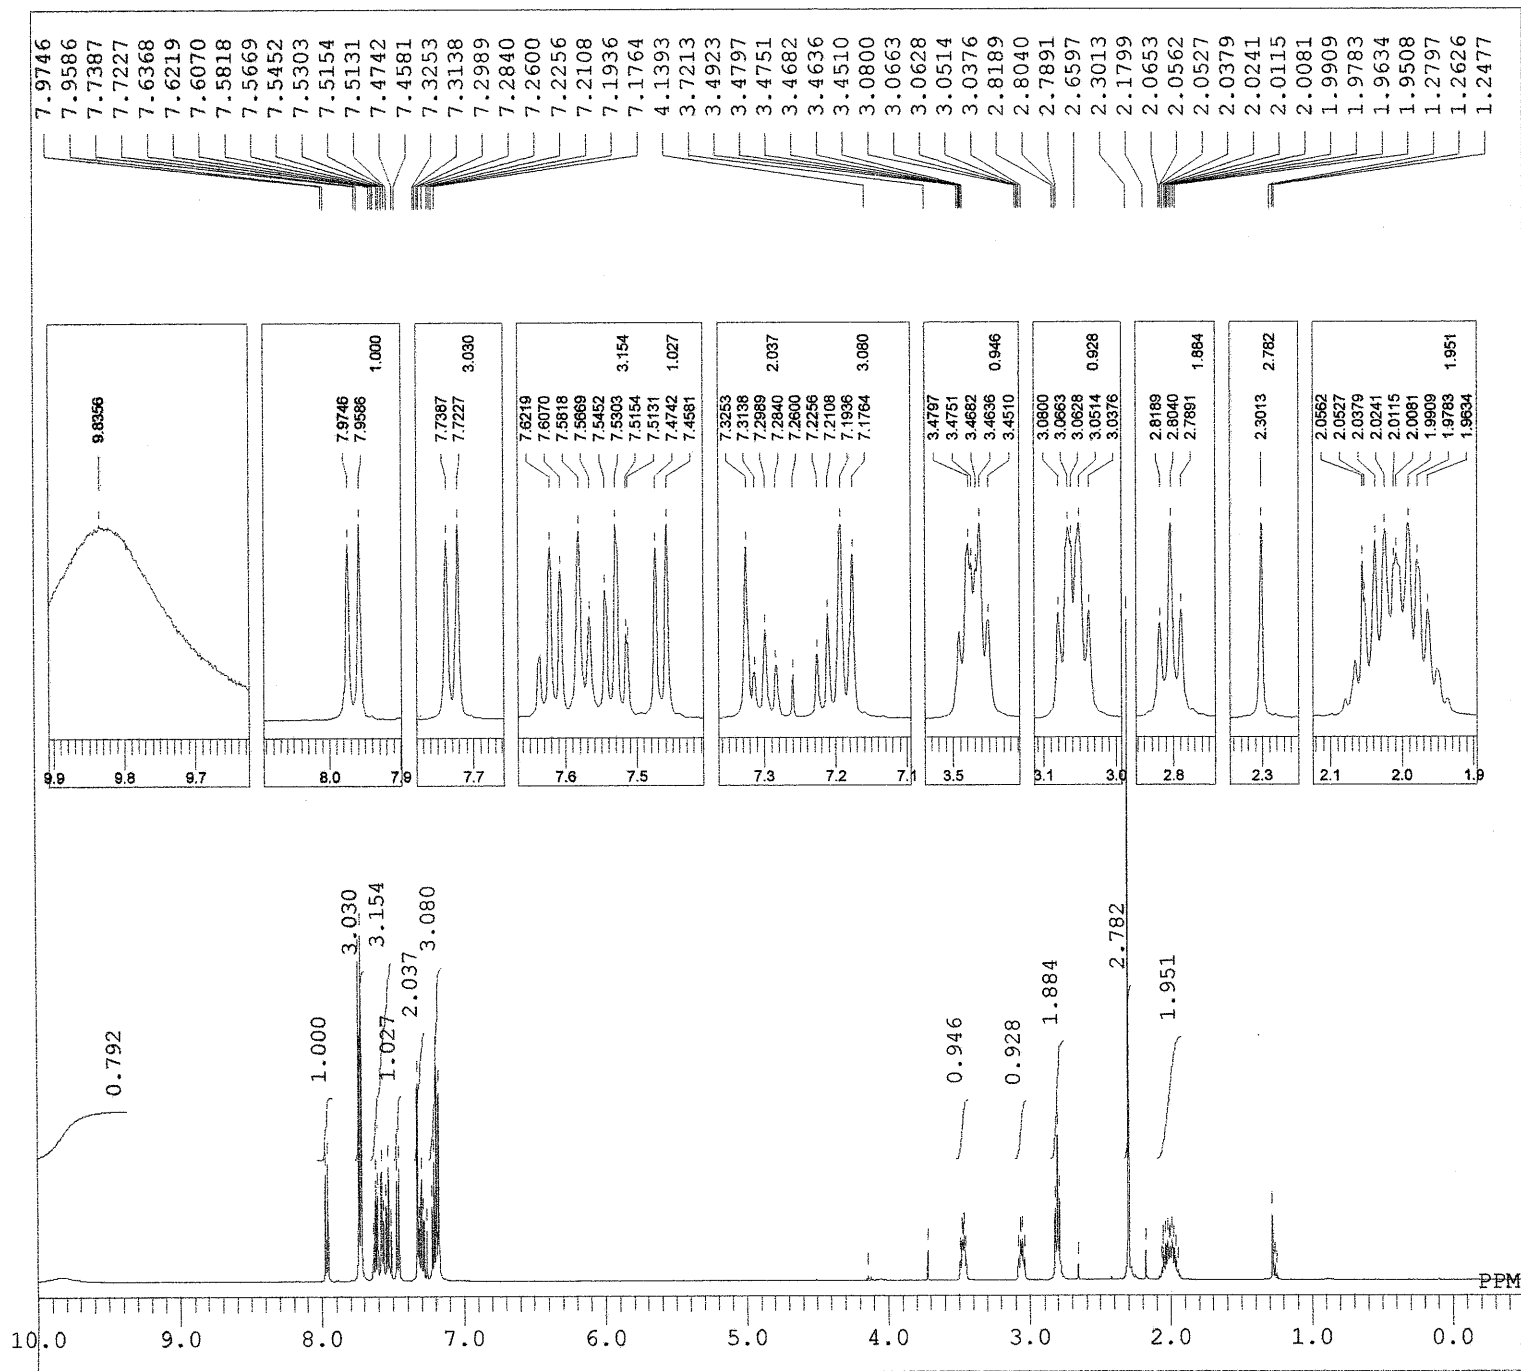

DFILE ozawa05-123\_1H.als  
COMNT Ts-indole, OH  
DATIM 2014-08-15 18:19:53  
OBNUC 1H  
EXMOD proton.jxp  
OBFRQ 500.16 MHz  
OBSET 2.41 KHz  
OBFIN 6.01 Hz  
POINT 13107  
FREQU 7507.51 Hz  
SCANS 4  
ACQTM 1.7459 sec  
PD 5.0000 sec  
PW1 5.55 usec  
IRNUC 1H  
CTEMP 25.9 c  
SLVNT CDCL3  
EXREF 7.26 ppm  
BF 0.12 Hz  
RGAIN 30

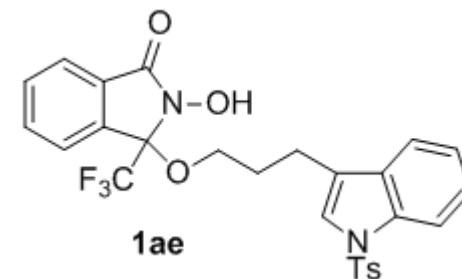

Ts-indole, OH

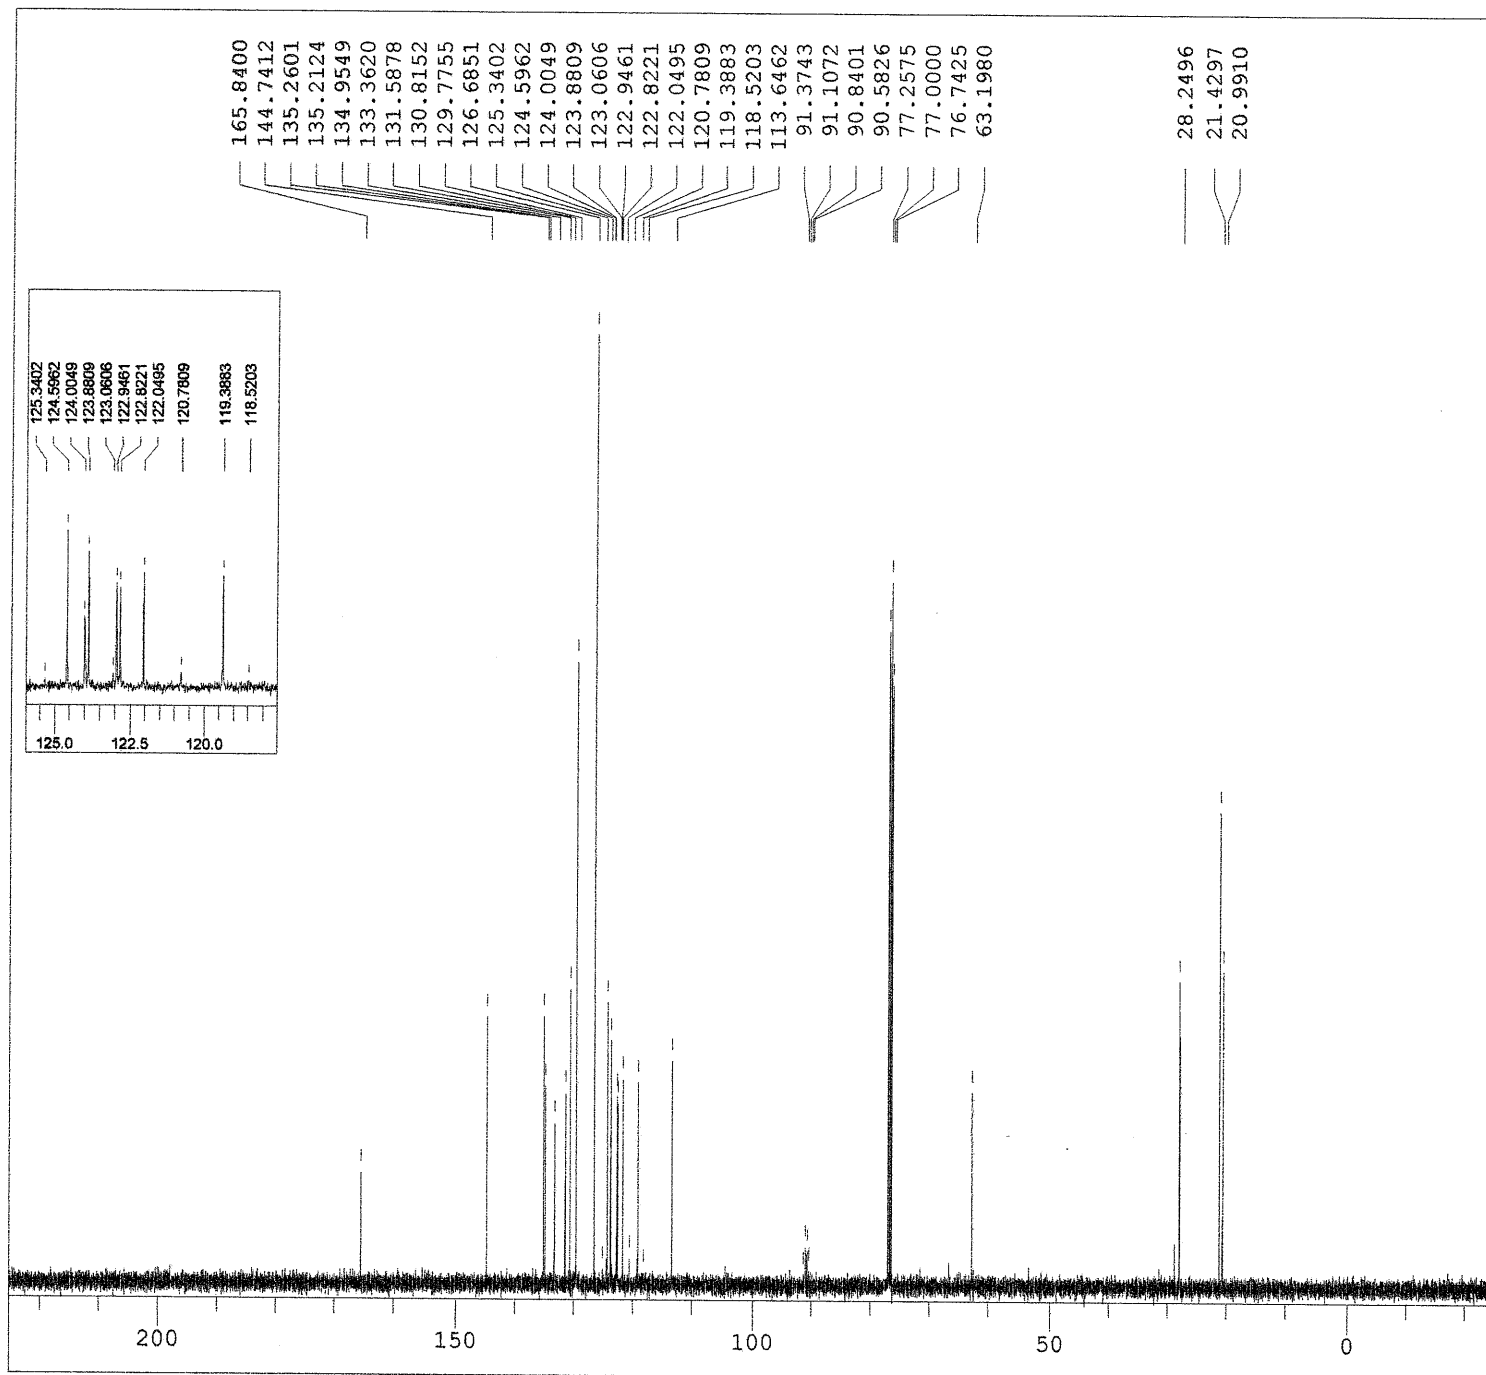

DFILE ozawa05-123\_13C.jdf  
COMNT Ts-indole, OH  
DATIM 2014-08-15 18:20:56  
OBNUC 13C  
EXMOD carbon.jxp  
OBFRQ 125.77 MHz  
OBSET 7.87 KHz  
OBFIN 4.21 Hz  
POINT 32767  
FREQU 39308.18 Hz  
SCANS 160  
ACQTM 0.8336 sec  
PD 3.0000 sec  
PW1 3.40 usec  
IRNUC 1H  
CTEMP 26.5 c  
SLVNT CDCL3  
EXREF 77.00 ppm  
BF 0.12 Hz  
RGAIN 60

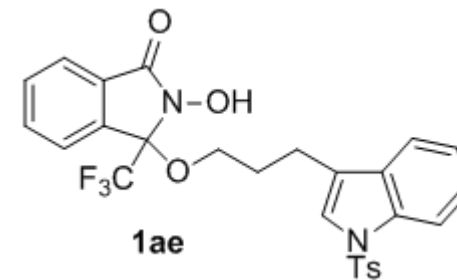

Ts-indole, OH

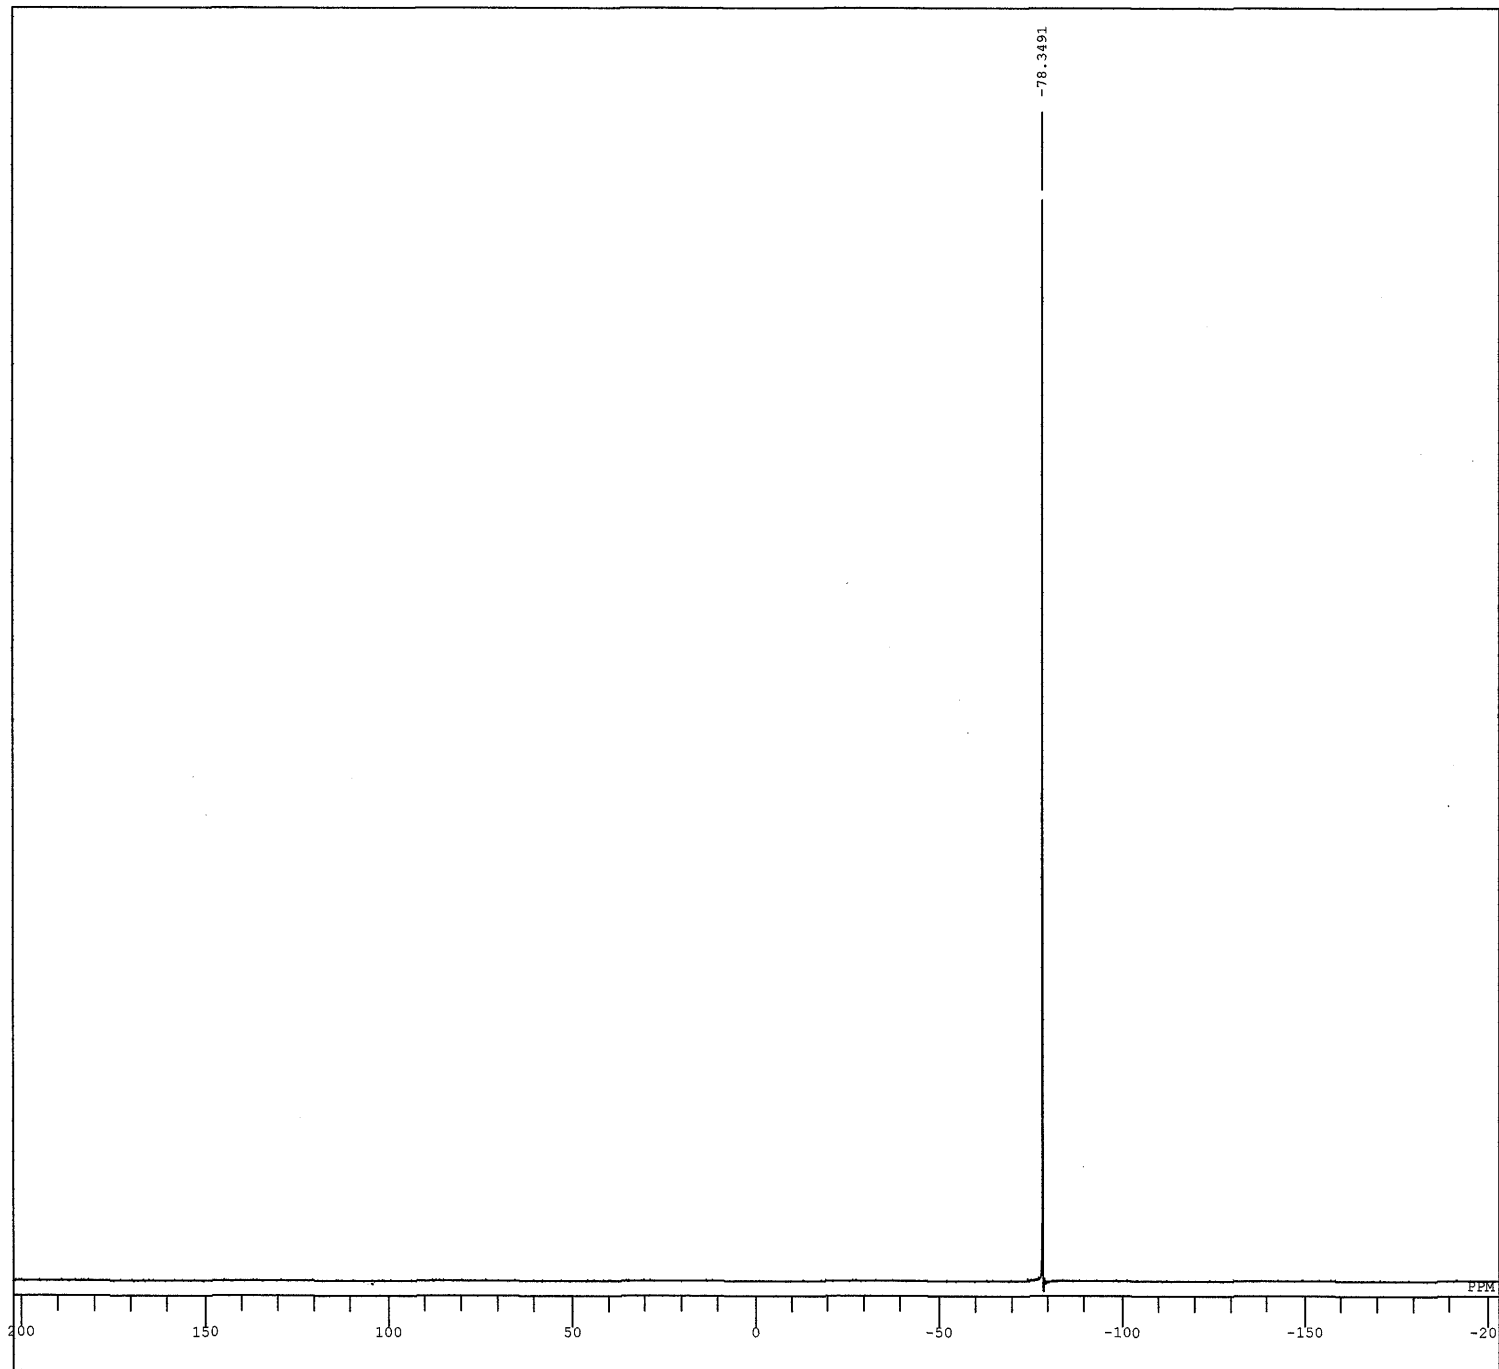

DFILE ozawa05-123\_19F.jdf  
COMNT Ts-indole, OH  
DATIM 15-08-2014 19:48:48  
OBNUC 19F  
EXMOD proton.jxp  
OBFRQ 368.64 MHz  
OBSEF 7.63 KHz  
OBFIN 2.85 Hz  
POINT 16384  
FREQU 186567.17 Hz  
SCANS 4  
ACQTM 0.0878 sec  
PD 5.0000 sec  
PW1 3.90 usec  
IRNUC 19F  
CTEMP 24.6 c  
SLVNT CDCL3  
EXREF -164.90 ppm  
BF 0.12 Hz  
RGAIN 46

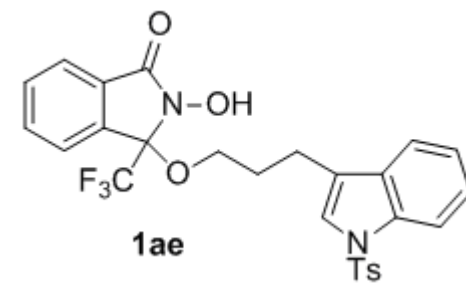

Ts-indole, [0]

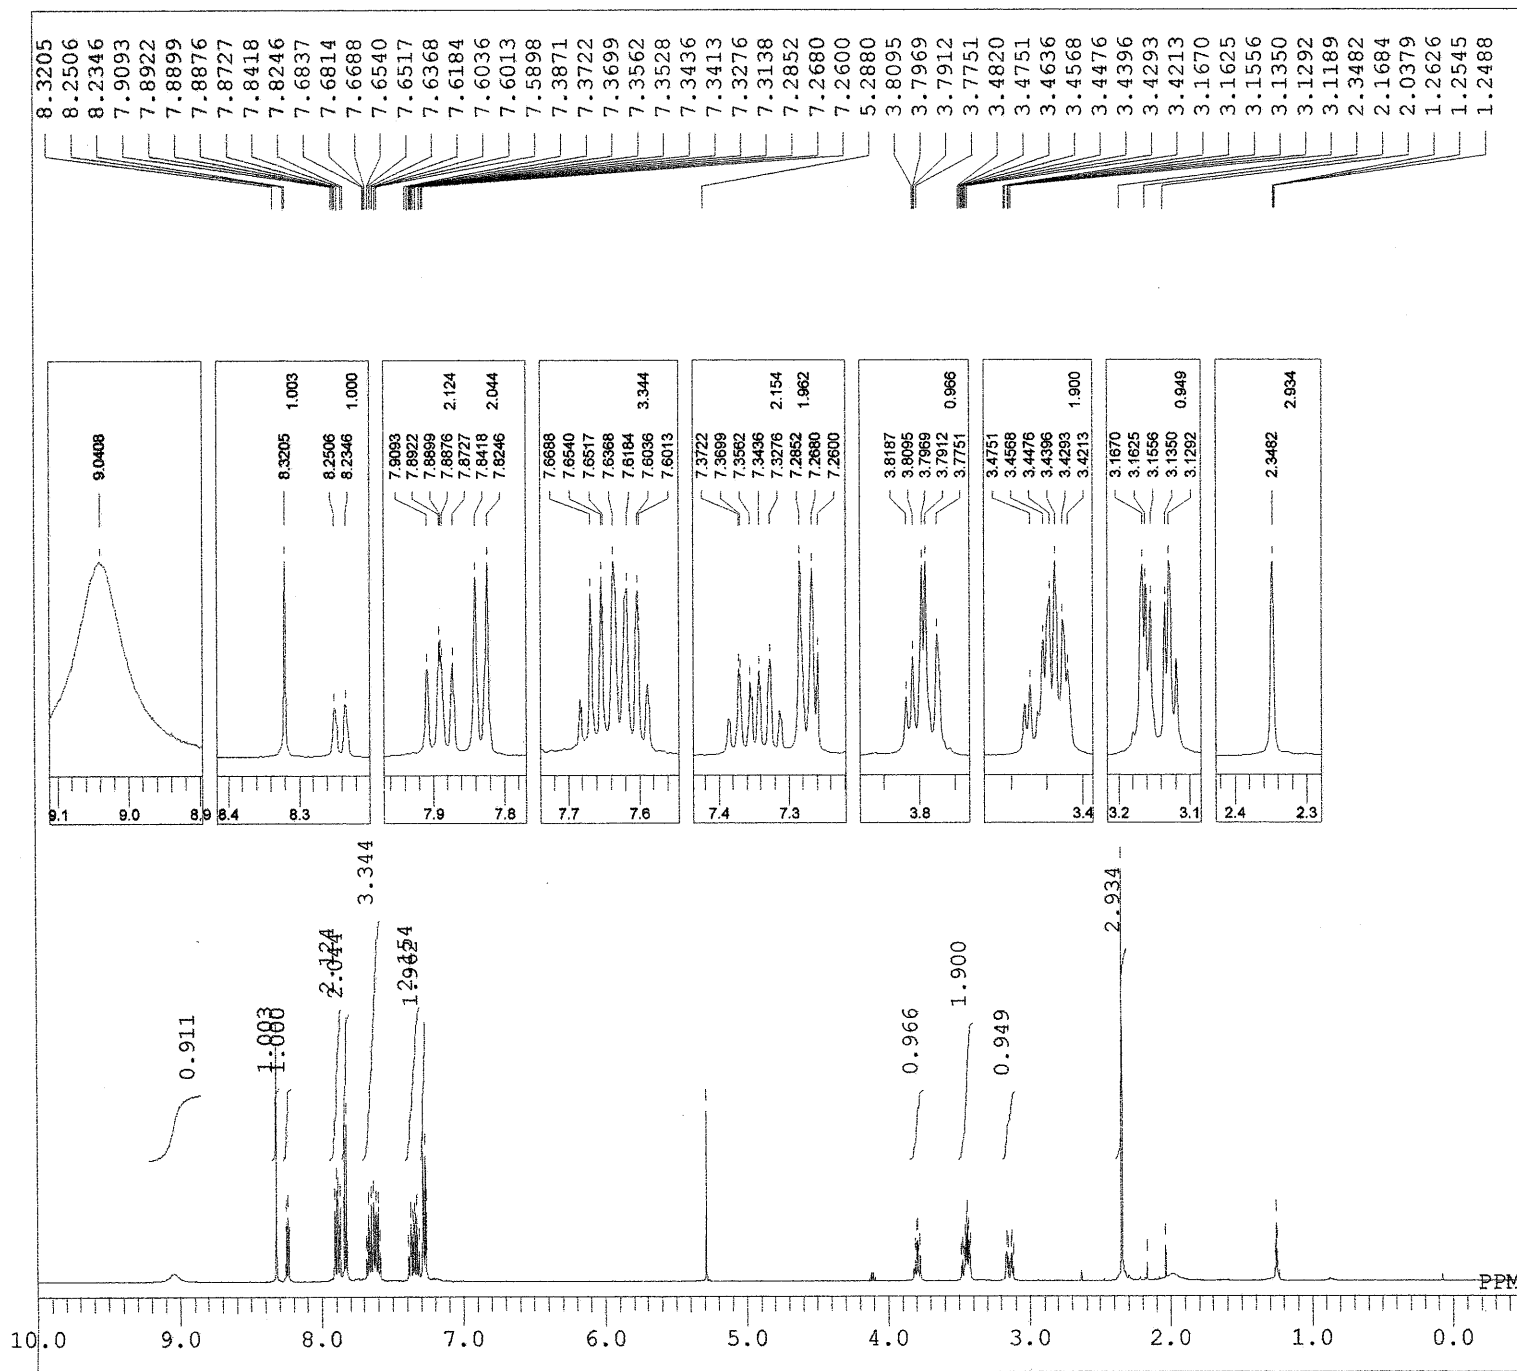

DFILE ozawa05-132\_1H.als  
COMNT Ts-indole, [0]  
DATIM 2014-08-14 17:05:43  
OBNUC 1H  
EXMOD proton.jxp  
OBFRQ 500.16 MHz  
OBSET 2.41 KHz  
OBFIN 6.01 Hz  
POINT 13107  
FREQU 7507.51 Hz  
SCANS 4  
ACQTM 1.7459 sec  
PD 5.0000 sec  
PW1 5.55 usec  
IRNUC 1H  
CTEMP 25.5 c  
SLVNT CDCL3  
EXREF 7.26 ppm  
BF 0.12 Hz  
RGAIN 34

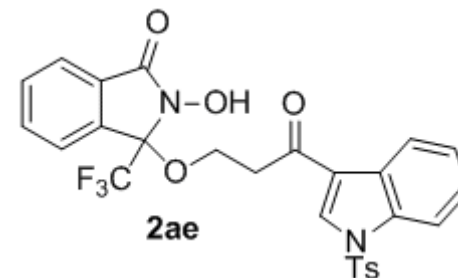

Ts-indole, [0]

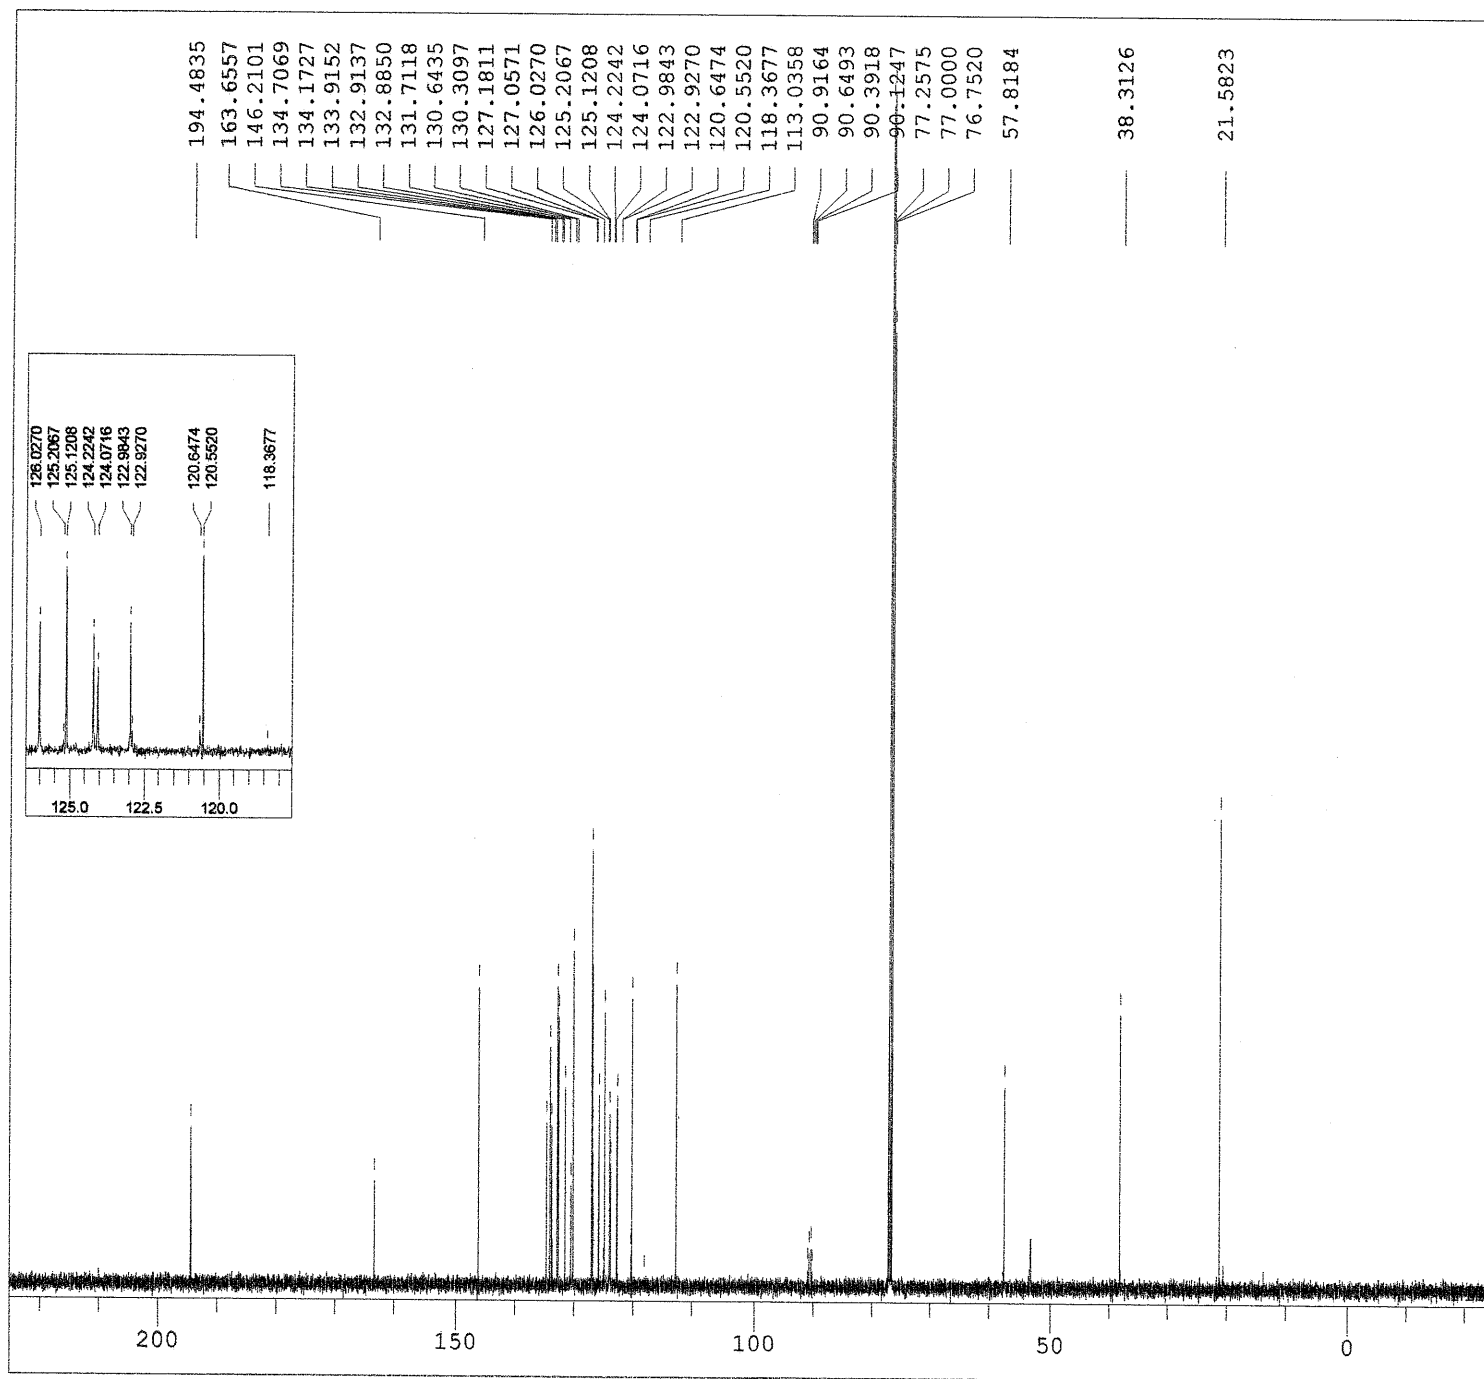

DFILE ozawa05-132\_13C.jdf  
COMNT Ts-indole, [0]  
DATIM 2014-08-14 17:06:47  
OBNUC 13C  
EXMOD carbon.jxp  
OBFRQ 125.77 MHz  
OBSET 7.87 KHz  
OBFIN 4.21 Hz  
POINT 32767  
FREQU 39308.18 Hz  
SCANS 600  
ACQTM 0.8336 sec  
PD 3.0000 sec  
PW1 3.40 usec  
IRNUC 1H  
CTEMP 26.3 c  
SLVNT CDCL3  
EXREF 77.00 ppm  
BF 0.12 Hz  
RGAIN 60

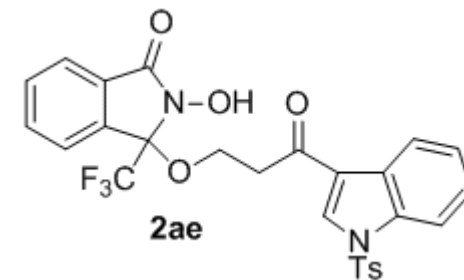



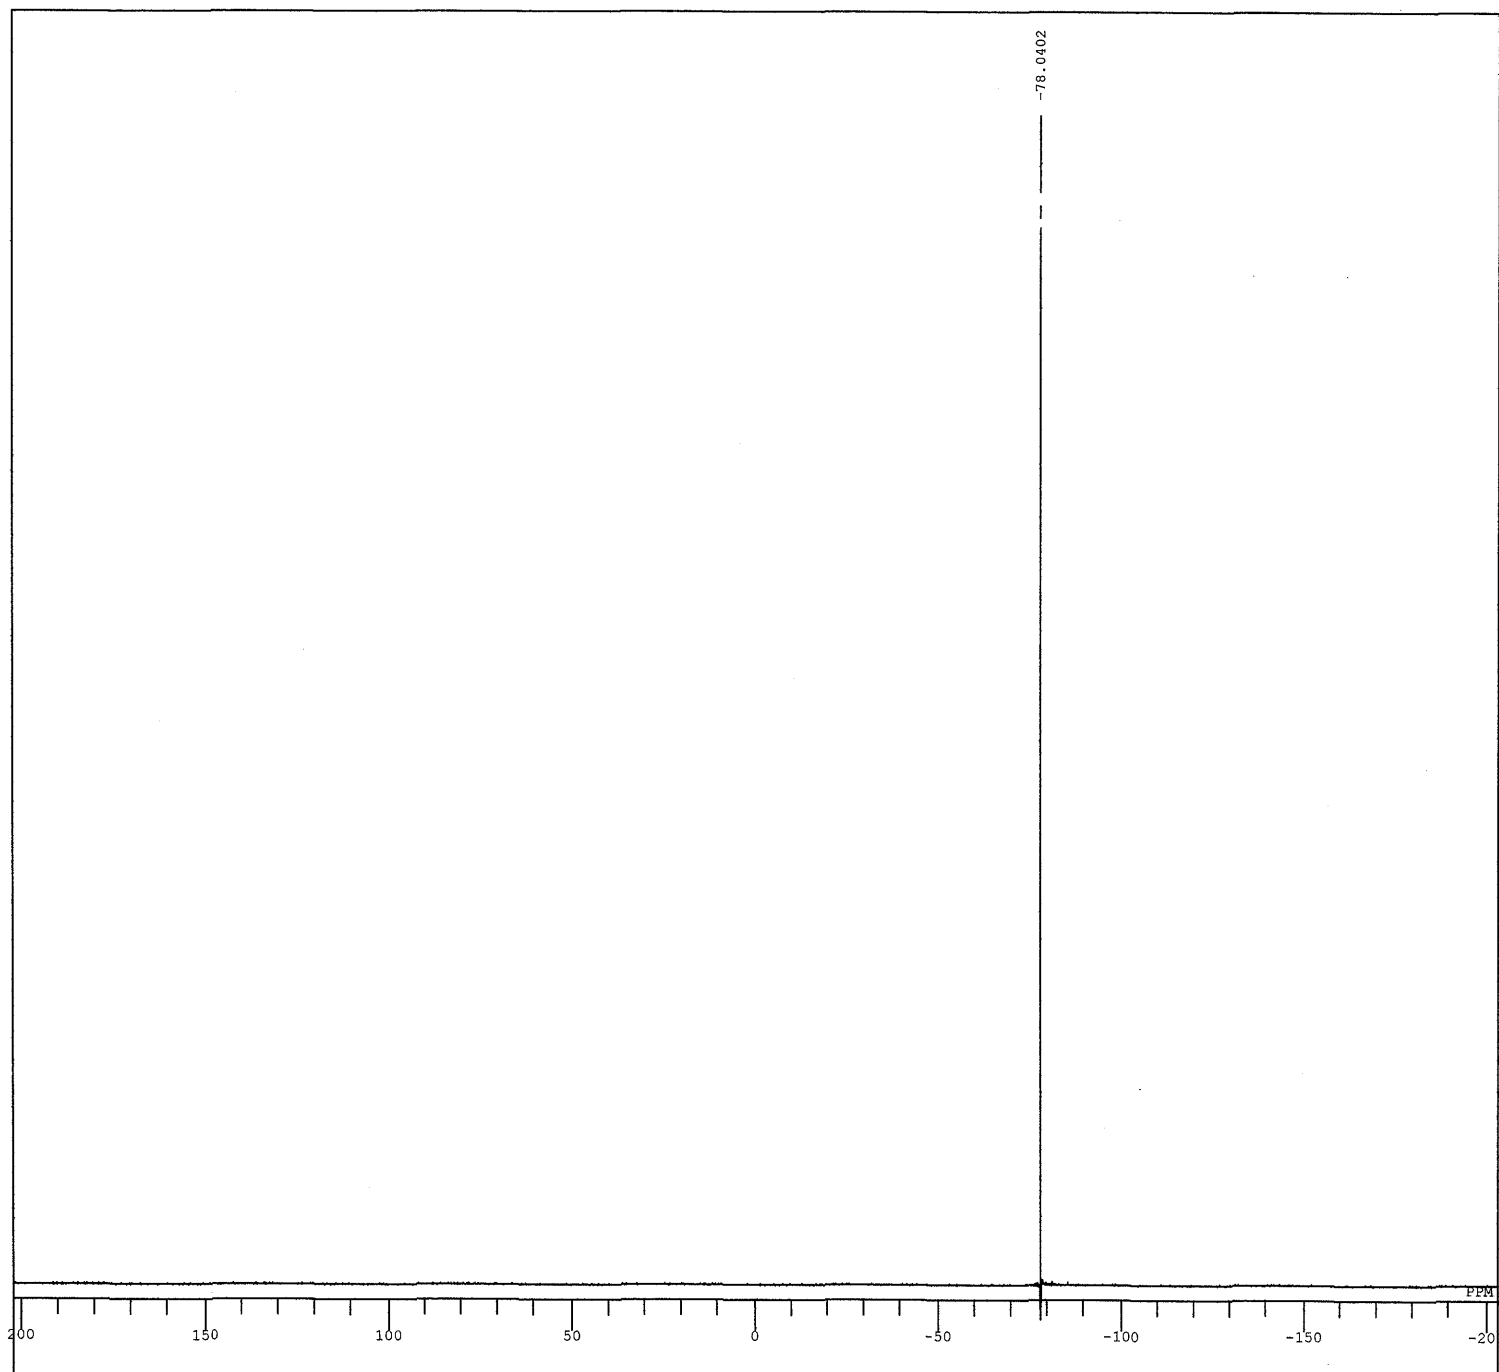

DFILE ozawa05-132\_19F.jdf  
COMNT Ts-indole  
DATIM 14-08-2014 19:23:06  
OBNUC 19F  
EXMOD proton.jxp  
OBFRO 368.64 MHz  
OBSET 7.63 KHz  
OBFIN 2.85 Hz  
POINT 16384  
FREQU 186567.17 Hz  
SCANS 4  
ACQTM 0.0878 sec  
PD 5.0000 sec  
PWL 3.90 usec  
IRNUC 19F  
CTEMP 24.2 c  
SLVNT CDCL3  
EXREF -164.90 ppm  
BF 0.12 Hz  
RGAIN 46

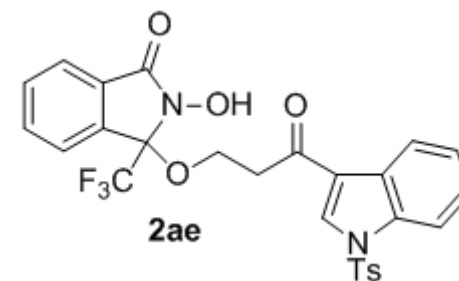

DFILE S7 HMR-1-1.als  
 COMNT  
 DATIM 30-05-2015 11:28:31  
 OBNUC 1H  
 EXMOD proton.jxp  
 OBFRQ 391.78 MHz  
 OBSET 8.51 KHz  
 OBFIN 3.34 Hz  
 POINT 13107  
 FREQU 5878.90 Hz  
 SCANS 8  
 ACQTM 2.2295 sec  
 PD 5.0000 sec  
 PW1 4.99 usec  
 IRNUC 1H  
 CTEMP 21.6 c  
 SLVNT CD3OD  
 EXREF 3.31 ppm  
 BF 0.12 Hz  
 RGAIN 44

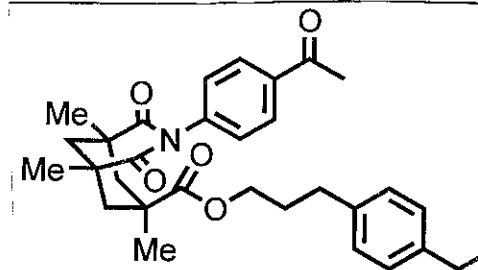

S7

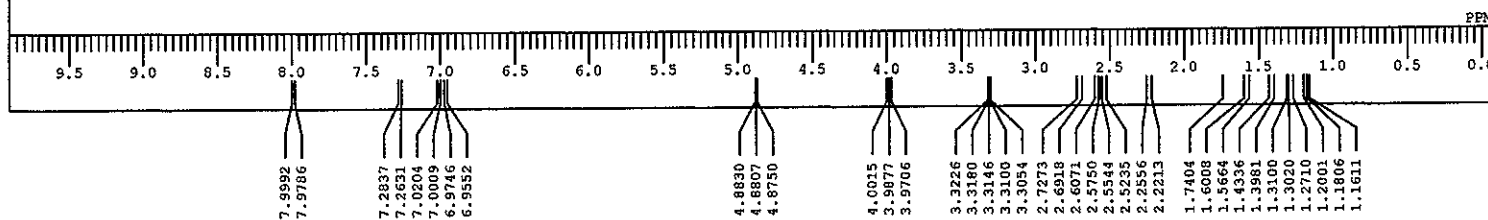

DFILE S7 CNMR.als  
 COMNT  
 DATIM 2015-05-06 14:46:47  
 OBNUC 13C  
 EXMOD carbon.jxp  
 OBFRQ 125.77 MHz  
 OBSET 7.87 KHz  
 OBFIN 4.21 Hz  
 POINT 32768  
 FREQU 31446.54 Hz  
 SCANS 3017  
 ACQTM 0.0000 sec  
 PD 2.0000 sec  
 PW1 3.40 usec  
 IRNUC 1H  
 CTEMP 21.9 c  
 SLVNT CDCL3  
 EXREF 77.16 ppm  
 BF 0.12 Hz  
 RGAIN 72

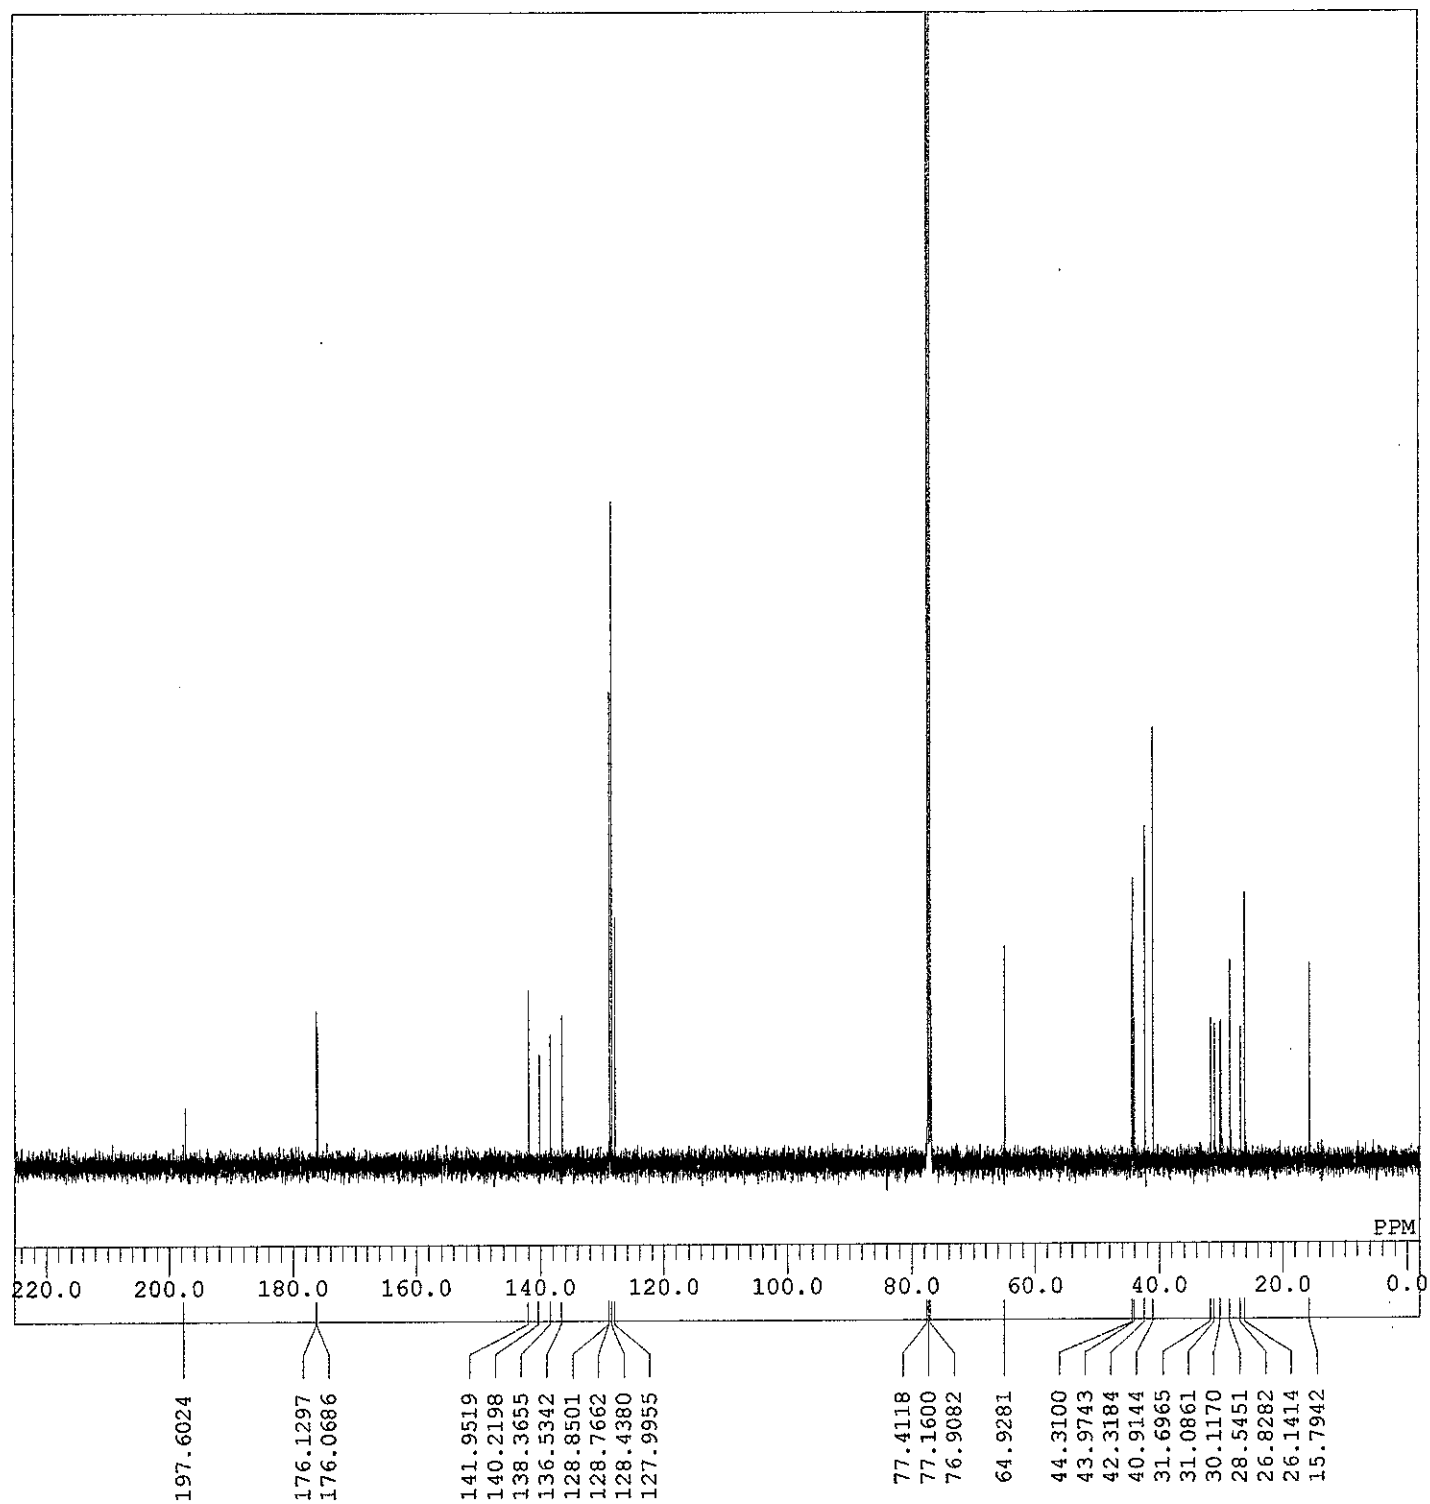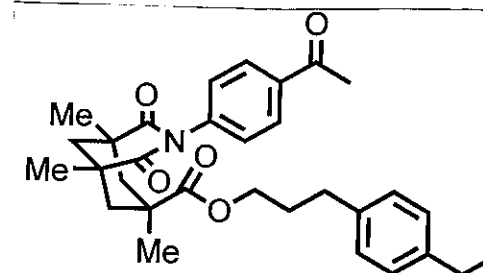

S7

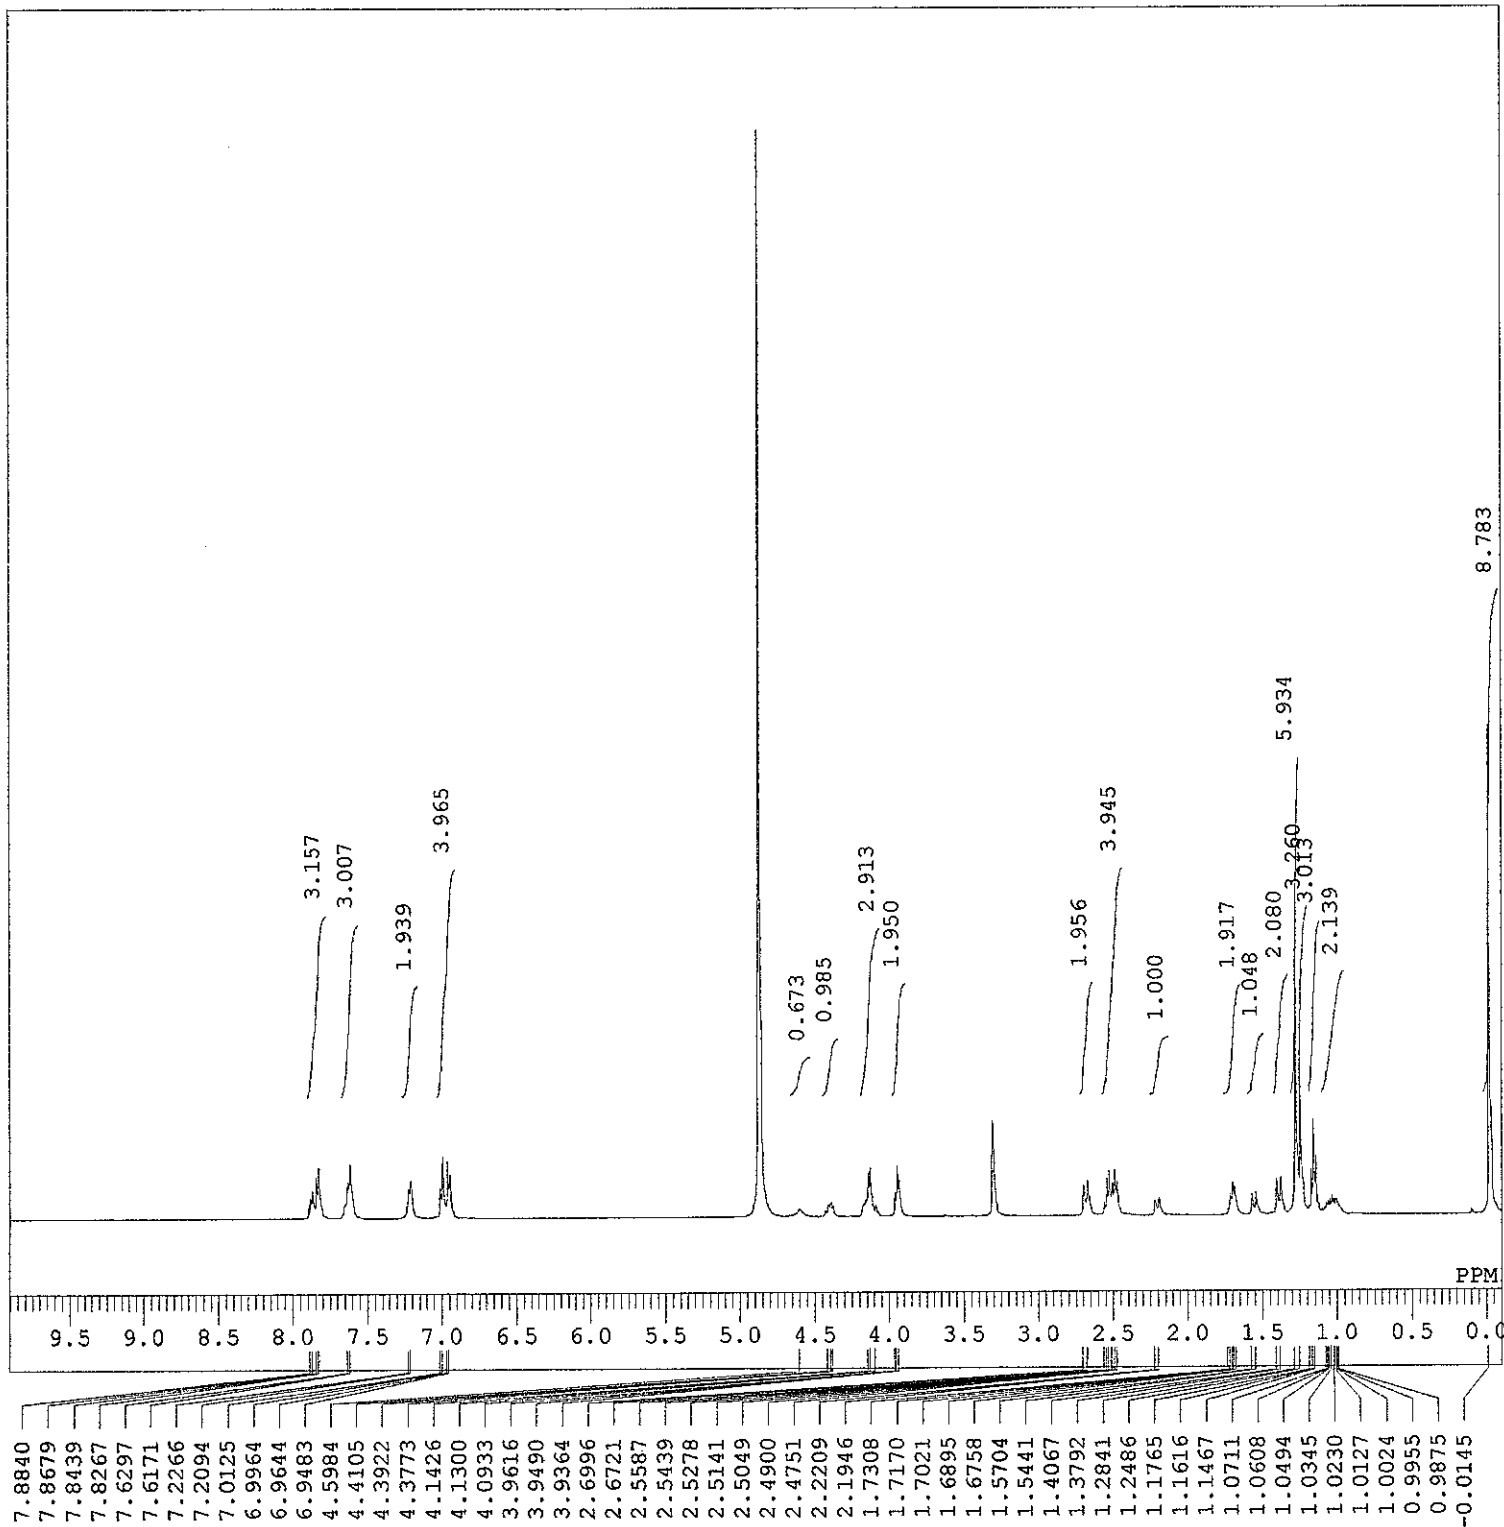

DFILE S8 HNMR.als  
 COMNT  
 DATIM 2015-05-06 18:35:39  
 OBNUC 1H  
 EXMOD proton.jxp  
 OBFRQ 500.16 MHz  
 OBSET 2.41 KHz  
 OBFIN 6.01 Hz  
 POINT 13107  
 FREQU 7507.51 Hz  
 SCANS 19  
 ACQTM 0.0000 sec  
 PD 5.0000 sec  
 PW1 5.55 usec  
 IRNUC 1H  
 CTEMP 21.4 c  
 SLVNT CD3OD  
 EXREF 3.31 ppm  
 BF 0.12 Hz  
 RGAIN 30

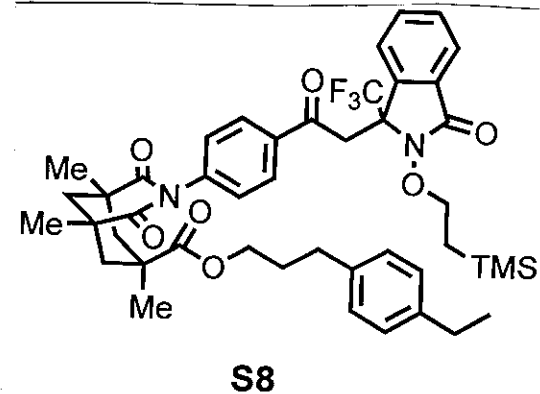

DFILE S8 CNMR.als  
 COMNT  
 DATIM 2015-05-06 18:43:52  
 OBNUC 13C  
 EXMOD carbon.jxp  
 OBFRQ 125.77 MHz  
 OBSET 7.87 KHz  
 OBFIN 4.21 Hz  
 POINT 32768  
 FREQU 31446.54 Hz  
 SCANS 16000  
 ACQTM 1.0420 sec  
 PD 2.0000 sec  
 PW1 3.40 usec  
 IRNUC 1H  
 CTEMP 21.9 c  
 SLVNT CD3OD  
 EXREF 49.00 ppm  
 BF 0.12 Hz  
 RGAIN 74

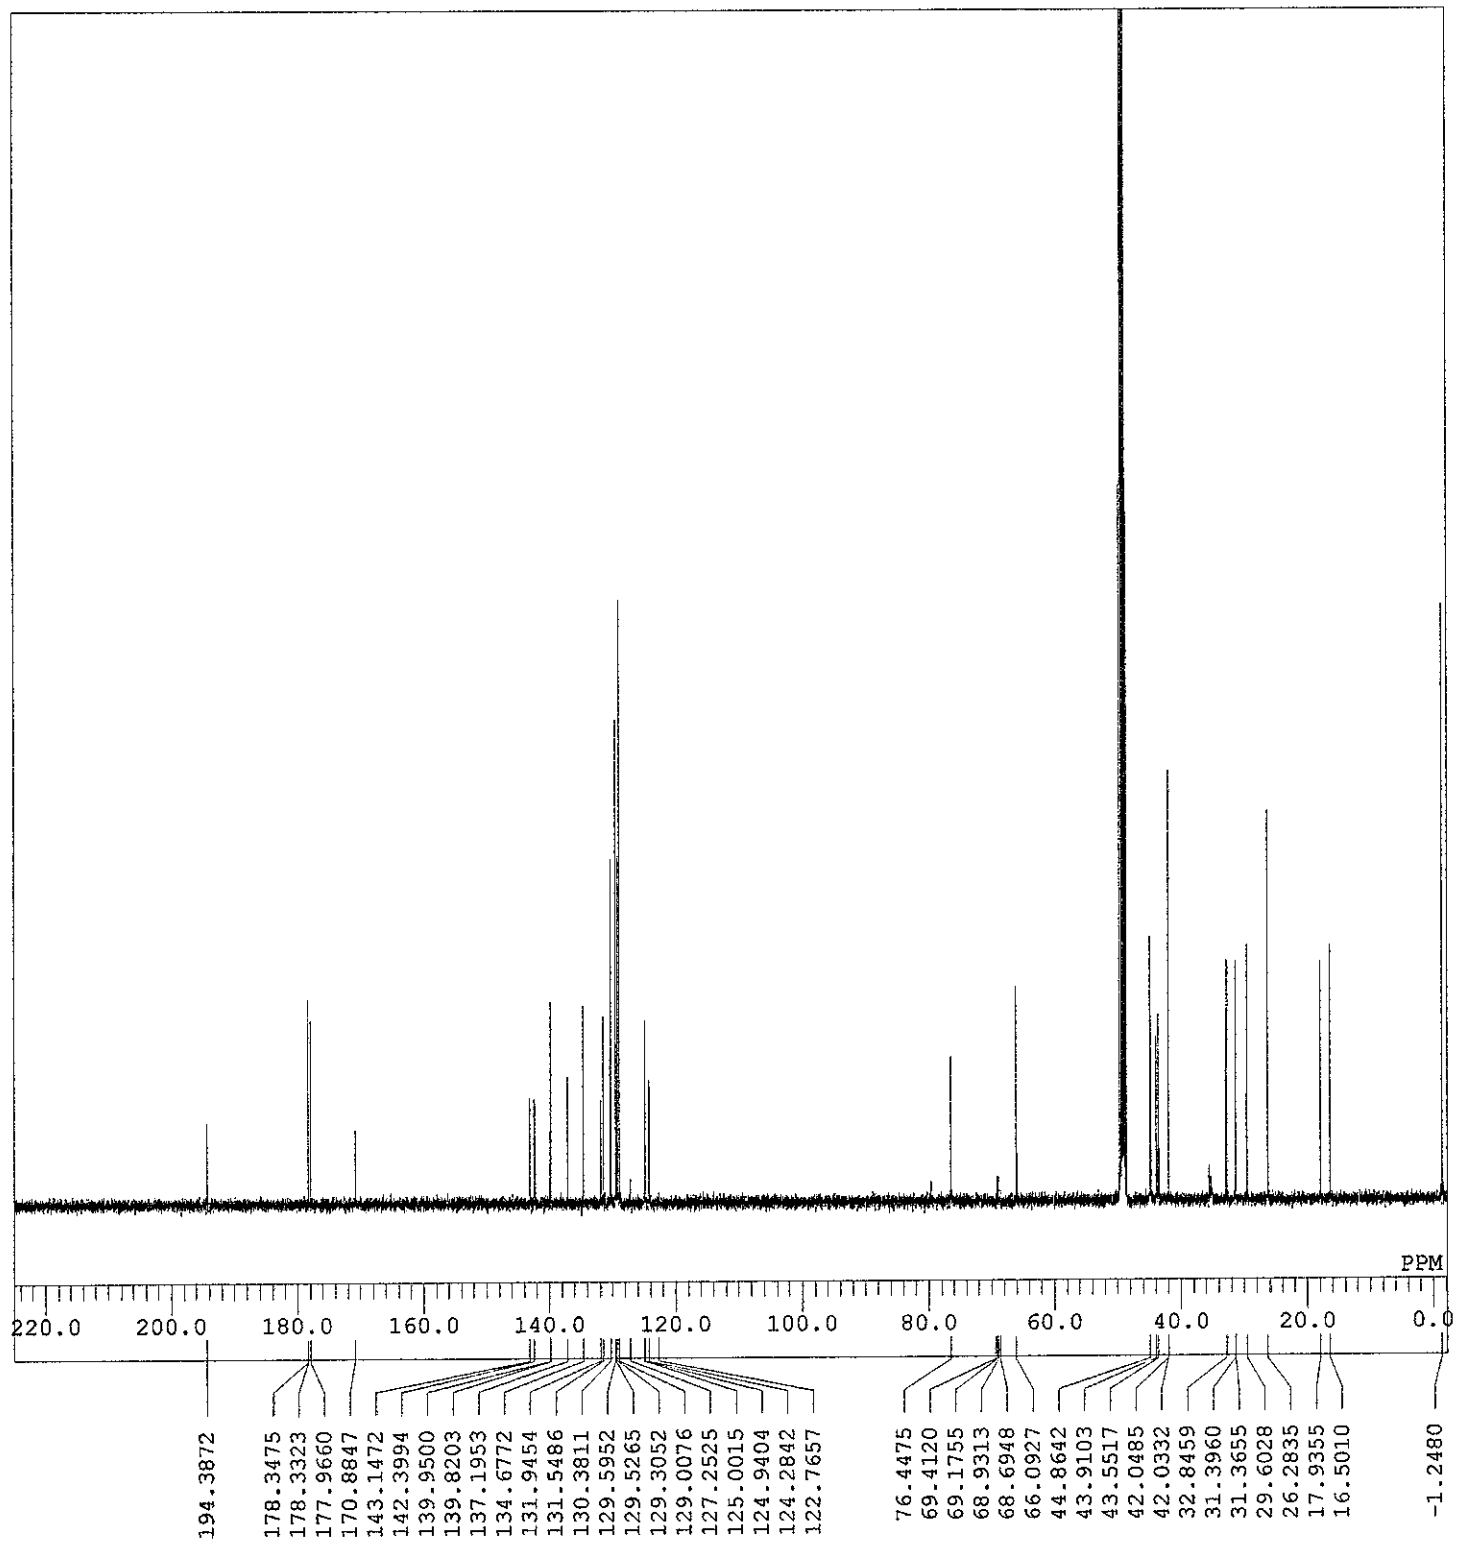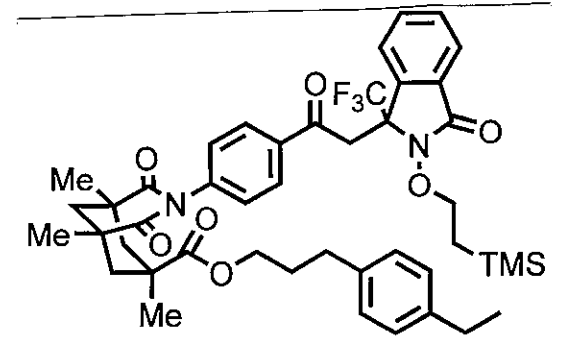

S8

DFILE S8 FMR-1-1.als  
 COMNT  
 DATIM 30-05-2015 11:11:30  
 OBNUC 19F  
 EXMOD proton.jxp  
 OBFRQ 368.64 MHz  
 OBSET 7.63 KHz  
 OBFIN 2.85 Hz  
 POINT 13107  
 FREQU 149253.73 Hz  
 SCANS 8  
 ACQTM 0.0878 sec  
 PD 5.0000 sec  
 PW1 3.90 usec  
 IRNUC 19F  
 CTEMP 21.7 c  
 SLVNT CDCL3  
 EXREF -164.90 ppm  
 BF 0.12 Hz  
 RGAIN 50

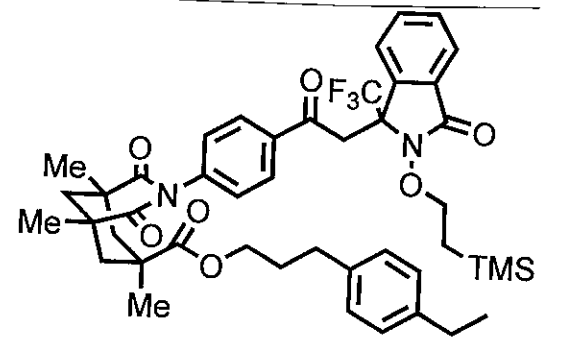

S8

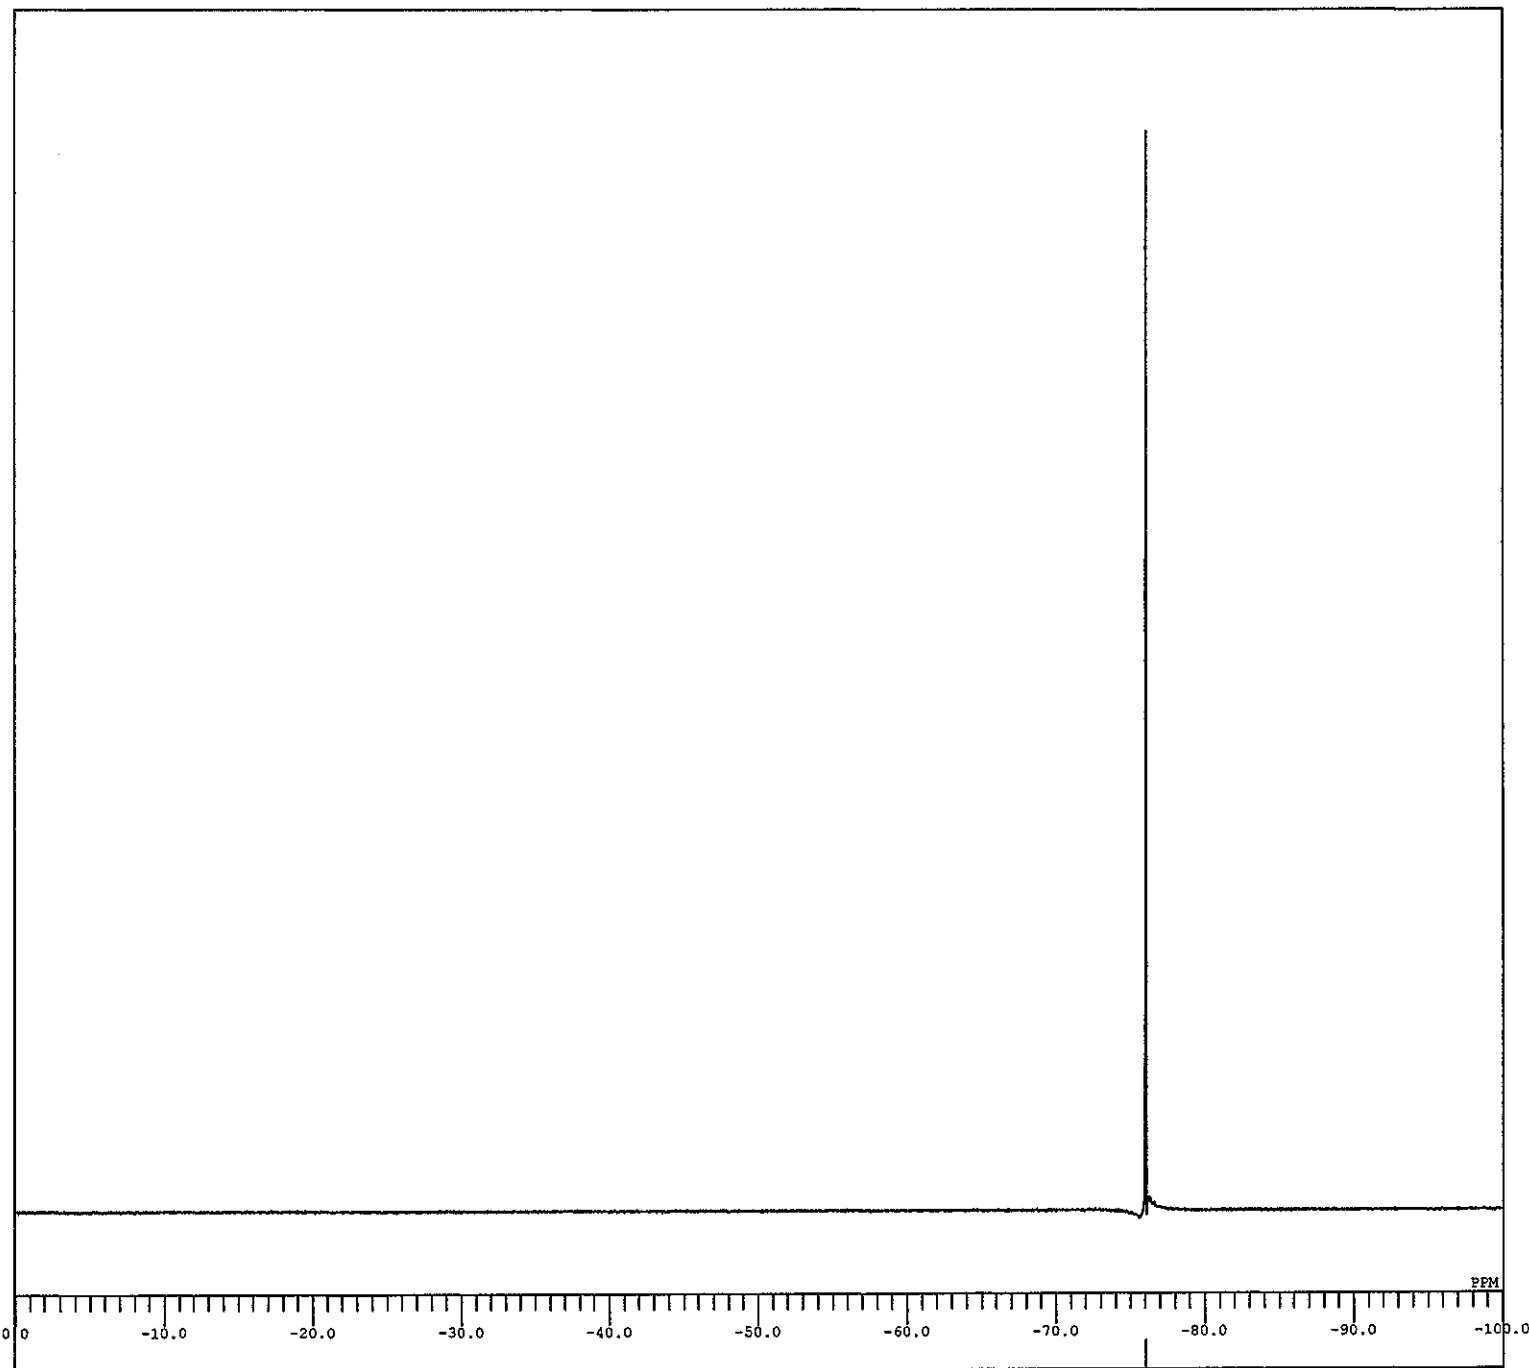

-76.0618

DFILE 3 HNMR.als  
 COMNT  
 DATIM 2015-05-28 14:11:51  
 OBNUC 1H  
 EXMOD proton.jxp  
 OBFRO 500.16 MHz  
 OBSET 2.41 KHz  
 OBFIN 6.01 Hz  
 POINT 13107  
 FREQU 7507.51 Hz  
 SCANS 8  
 ACQTM 1.7459 sec  
 PD 5.0000 sec  
 PW1 5.55 usec  
 IRNUC 1H  
 CTEMP 21.0 c  
 SLVNT CD3OD  
 EXREF 3.31 ppm  
 BF 0.12 Hz  
 RGAIN 30

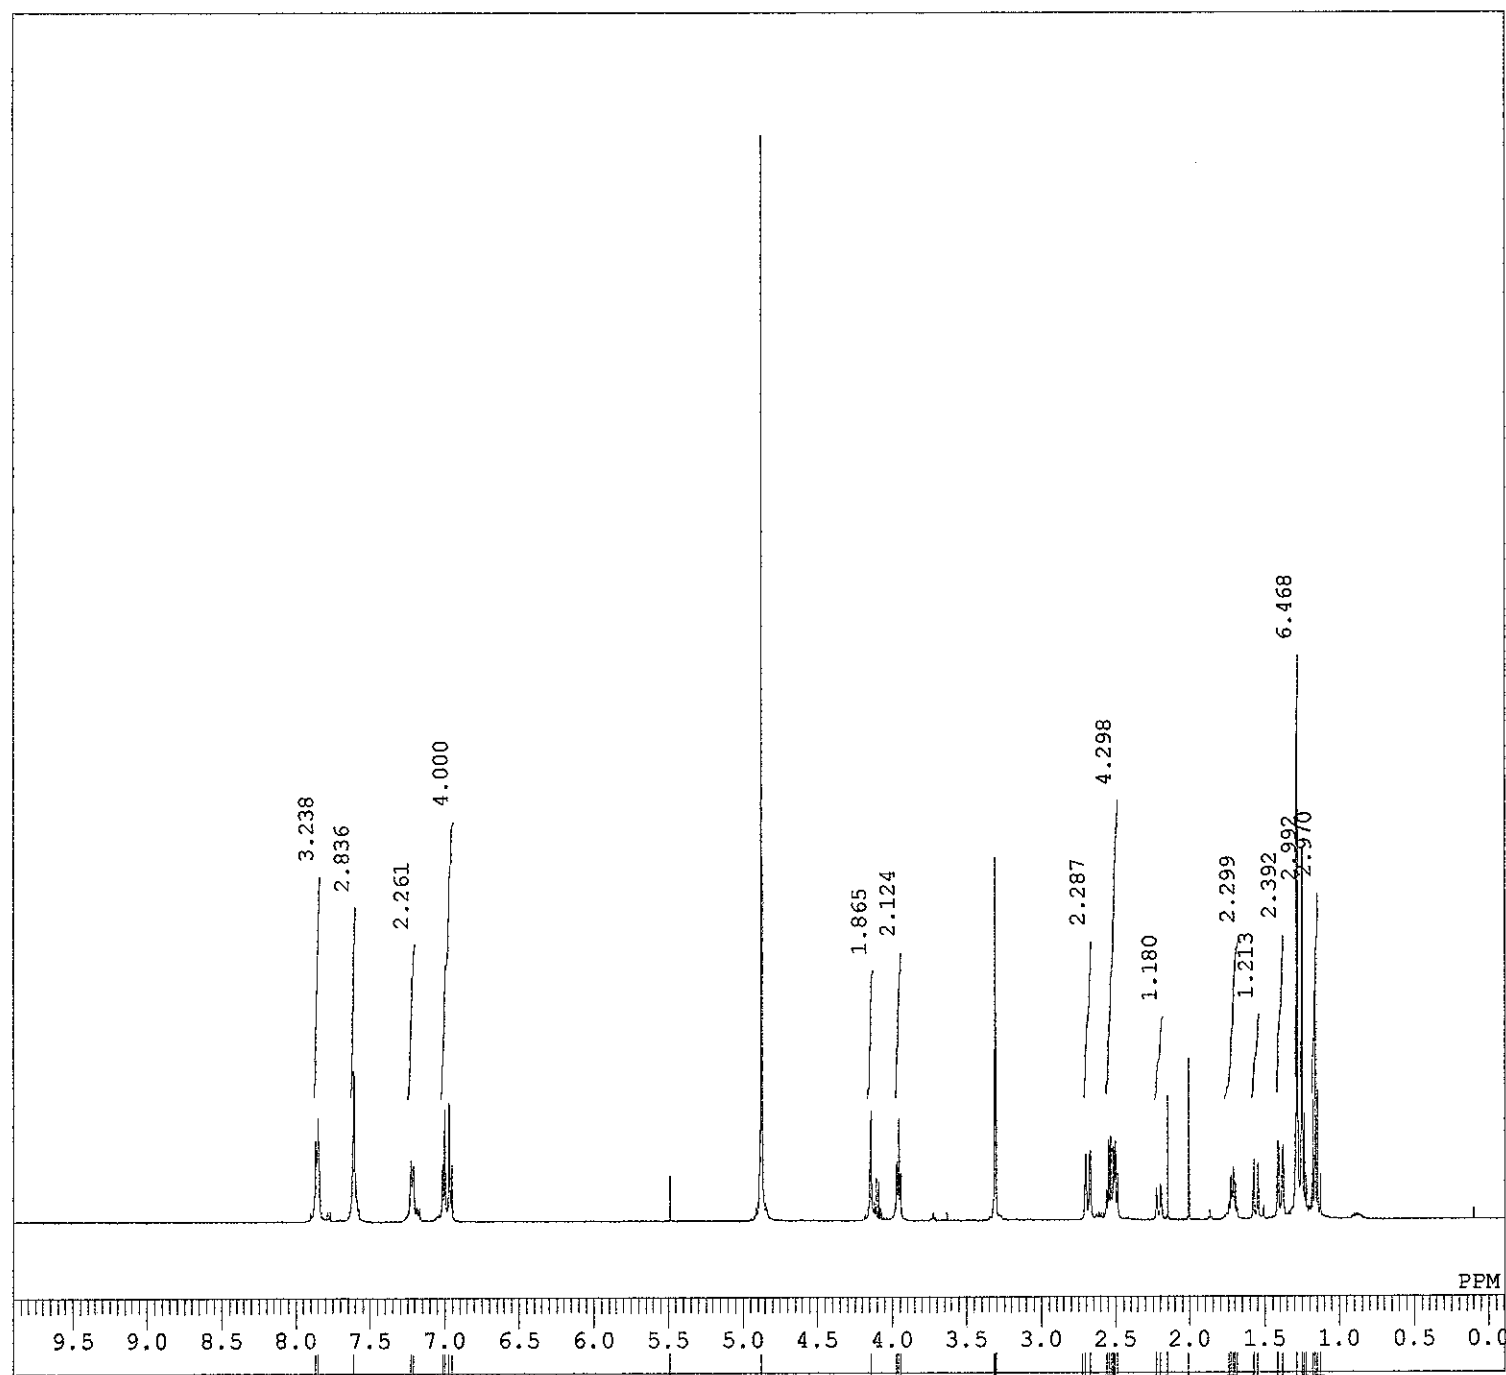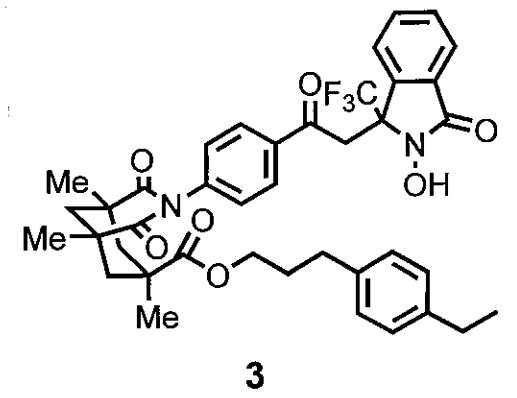

7.8702  
 7.8530  
 7.6125  
 7.2277  
 7.2117  
 7.0159  
 6.9999  
 6.9724  
 6.9563  
 5.4893  
 4.8766  
 4.1414  
 3.9696  
 3.9570  
 3.9444  
 3.3157  
 3.3123  
 3.3100  
 3.3066  
 3.3031  
 2.7225  
 2.7008  
 2.6733  
 2.5633  
 2.5473  
 2.5324  
 2.5187  
 2.5118  
 2.5038  
 2.4889  
 2.2255  
 2.1992  
 2.1533  
 2.0113  
 1.7422  
 1.7296  
 1.7147  
 1.7010  
 1.6872  
 1.5762  
 1.5498  
 1.4112  
 1.3838  
 1.2876  
 1.2841  
 1.2521  
 1.2383  
 1.2234  
 1.1799  
 1.1639  
 1.1490  
 1.1284

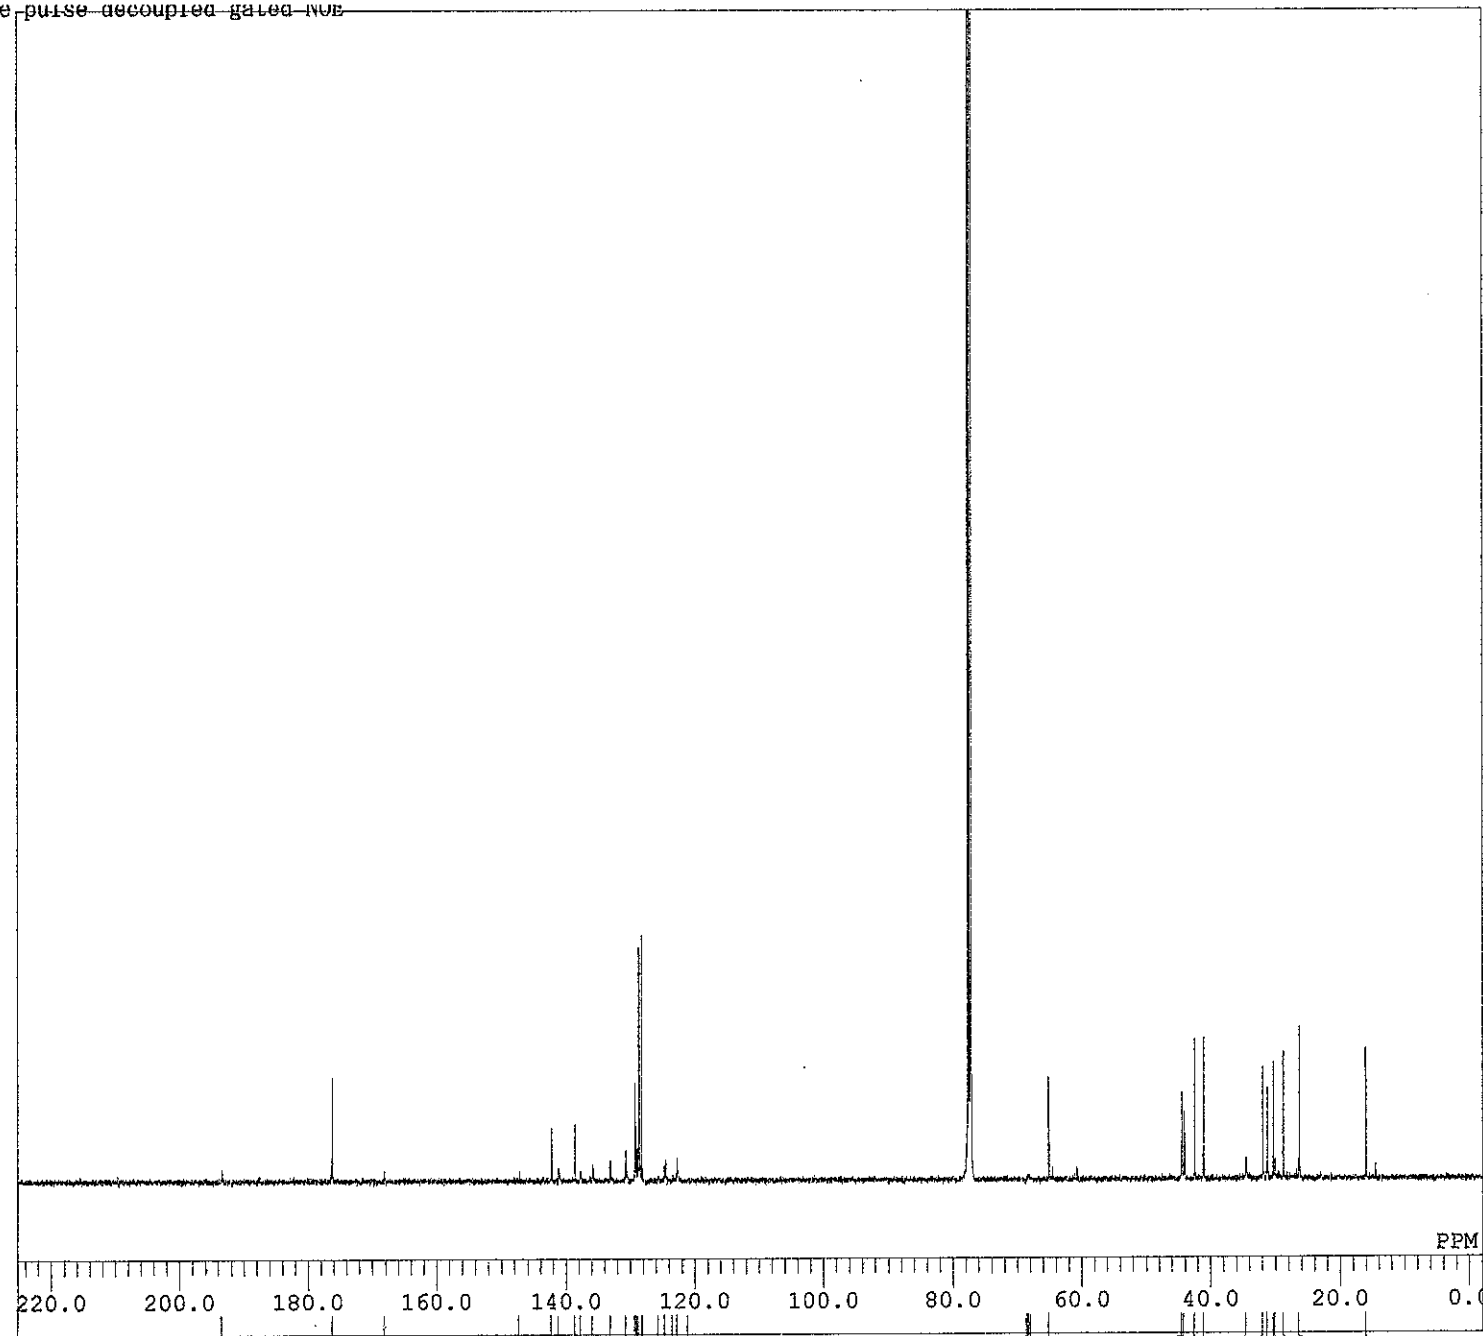

- 193.3863
- 176.3029
- 176.2743
- 168.1380
- 147.2487
- 142.2124
- 141.1250
- 138.5878
- 137.7293
- 135.8407
- 133.0936
- 130.6899
- 129.2591
- 129.0684
- 128.9253
- 128.6487
- 128.2195
- 127.9810
- 125.6727
- 124.6235
- 123.3739
- 122.7158
- 121.0751
- 68.5468
- 68.3465
- 68.1271
- 67.8981
- 65.0938
- 44.5575
- 44.4717
- 44.1378
- 42.5163
- 41.1523
- 34.5421
- 31.9572
- 31.2418
- 30.3356
- 30.0876
- 28.7427
- 26.2818
- 16.0184

DFILE 3 CNMR.als  
 COMNT single pulse decoupled gated 1  
 DATIM 2015-05-29 23:00:44  
 OBNUC 13C  
 EXMOD carbon.jxp  
 OBFREQ 125.77 MHz  
 OBSET 7.87 KHz  
 OBFIN 4.21 Hz  
 POINT 26214  
 FREQU 31446.54 Hz  
 SCANS 13769  
 ACQTM 0.0000 sec  
 PD 2.0000 sec  
 PW1 3.40 usec  
 IRNUC 1H  
 CTEMP 21.3 c  
 SLVNT CDCL3  
 EXREF 77.16 ppm  
 BF 1.20 Hz  
 RGAIN 50

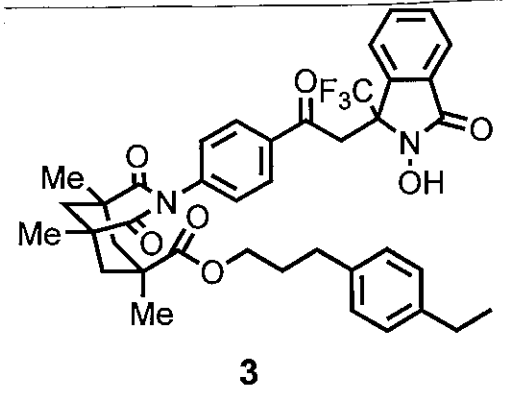



DFILE 3 FNMR-1-1.als  
COMNT  
DATIM 30-05-2015 11:15:10  
OBNUC 19F  
EXMOD proton.jxp  
OBFRQ 368.64 MHz  
OBSET 7.63 KHz  
OBFIN 2.85 Hz  
POINT 13107  
FREQU 149253.73 Hz  
SCANS 8  
ACQTM 0.0878 sec  
PD 5.0000 sec  
PWL 3.90 usec  
IRNUC 19F  
CTEMP 21.7 c  
SLVNT CDCL3  
EXREF -164.90 ppm  
BF 0.12 Hz  
RGAIN 50

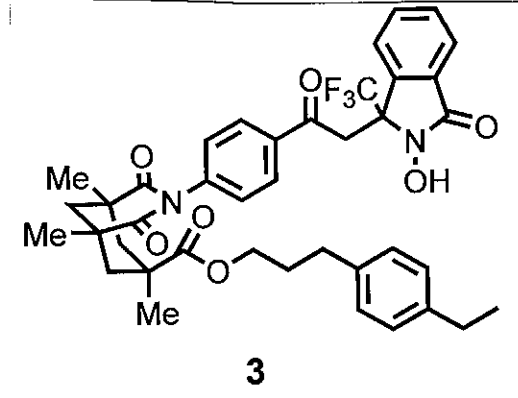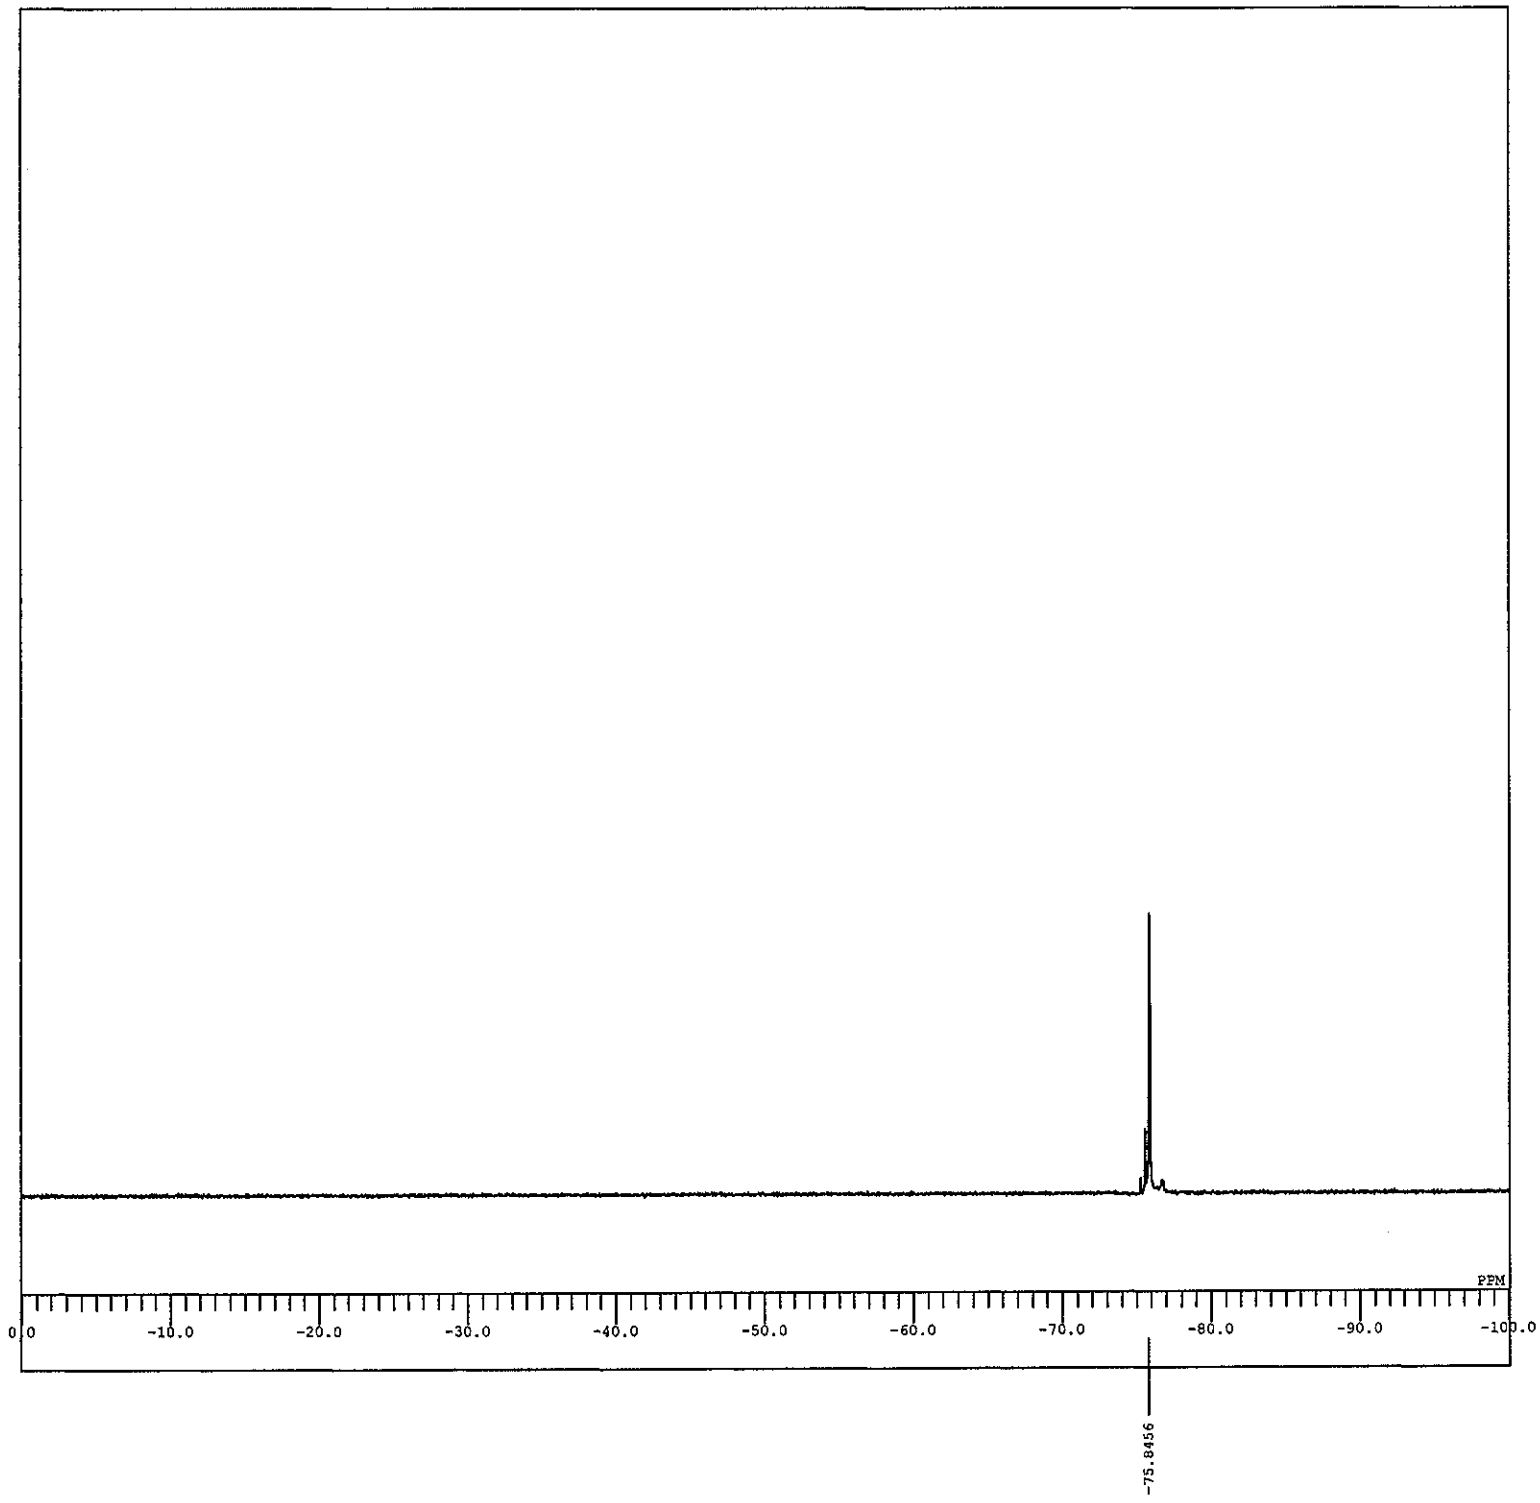

DFILE 4 HNMR.als  
 COMNT  
 DATIM 2015-05-27 22:54:43  
 OBNUC 1H  
 EXMOD proton.jxp  
 OBFRQ 500.16 MHz  
 OBSET 2.41 KHz  
 OBFIN 6.01 Hz  
 POINT 13107  
 FREQU 7507.51 Hz  
 SCANS 8  
 ACQTM 1.7459 sec  
 PD 5.0000 sec  
 PW1 5.55 usec  
 IRNUC 1H  
 CTEMP 21.1 c  
 SLVNT CD3OD  
 EXREF 3.31 ppm  
 BF 0.12 Hz  
 RGAIN 30

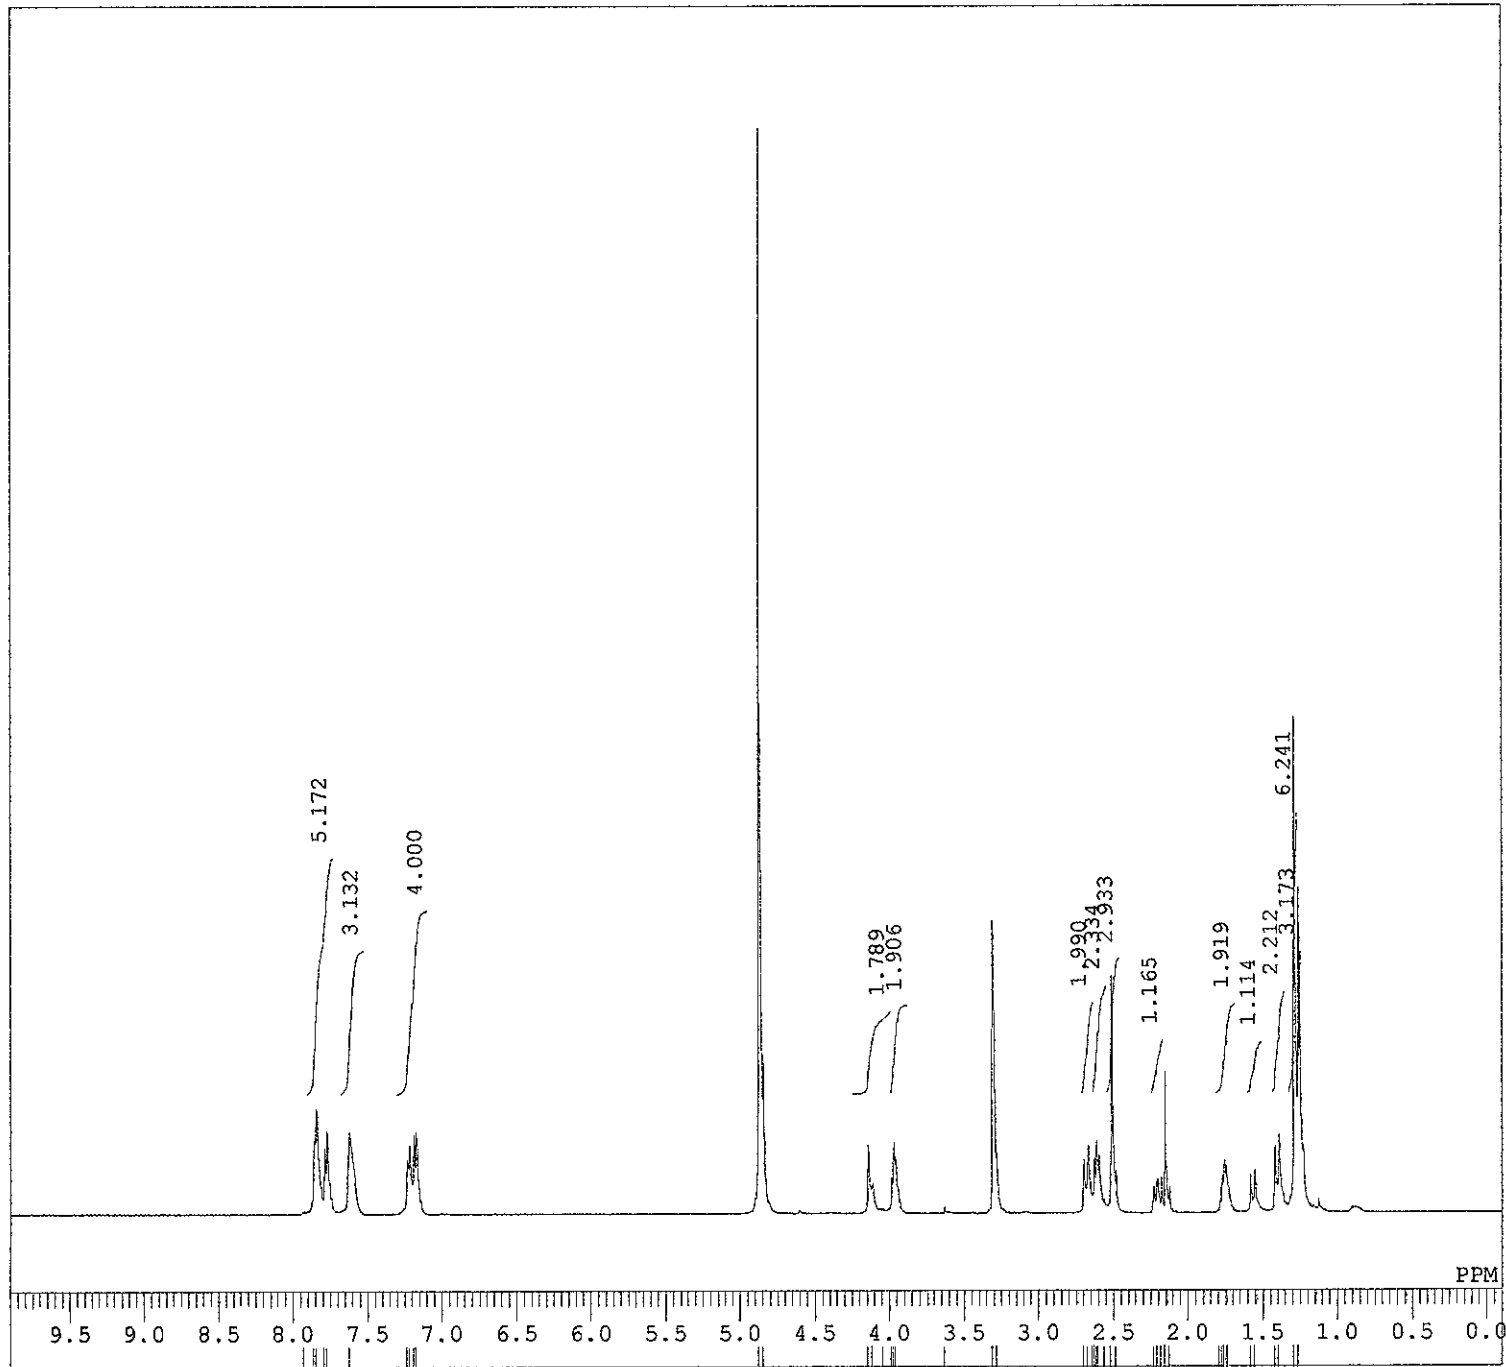

7.9229  
 7.8565  
 7.8427  
 7.7878  
 7.7717  
 7.6206  
 7.2346  
 7.2186  
 7.1888  
 7.1728  
 4.8766  
 4.8457  
 4.1426  
 4.1128  
 4.0429  
 3.9834  
 3.9719  
 3.9593  
 3.6329  
 3.3100  
 3.3066  
 3.2825  
 3.2791  
 2.6973  
 2.6687  
 2.6389  
 2.6275  
 2.6126  
 2.5977  
 2.5610  
 2.5118  
 2.4809  
 2.2312  
 2.2049  
 2.1785  
 2.1545  
 2.1236  
 1.7857  
 1.7720  
 1.7582  
 1.7445  
 1.7308  
 1.5819  
 1.5555  
 1.4193  
 1.3906  
 1.2899  
 1.2589

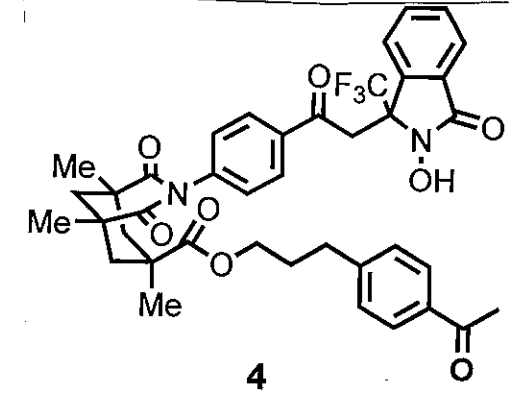

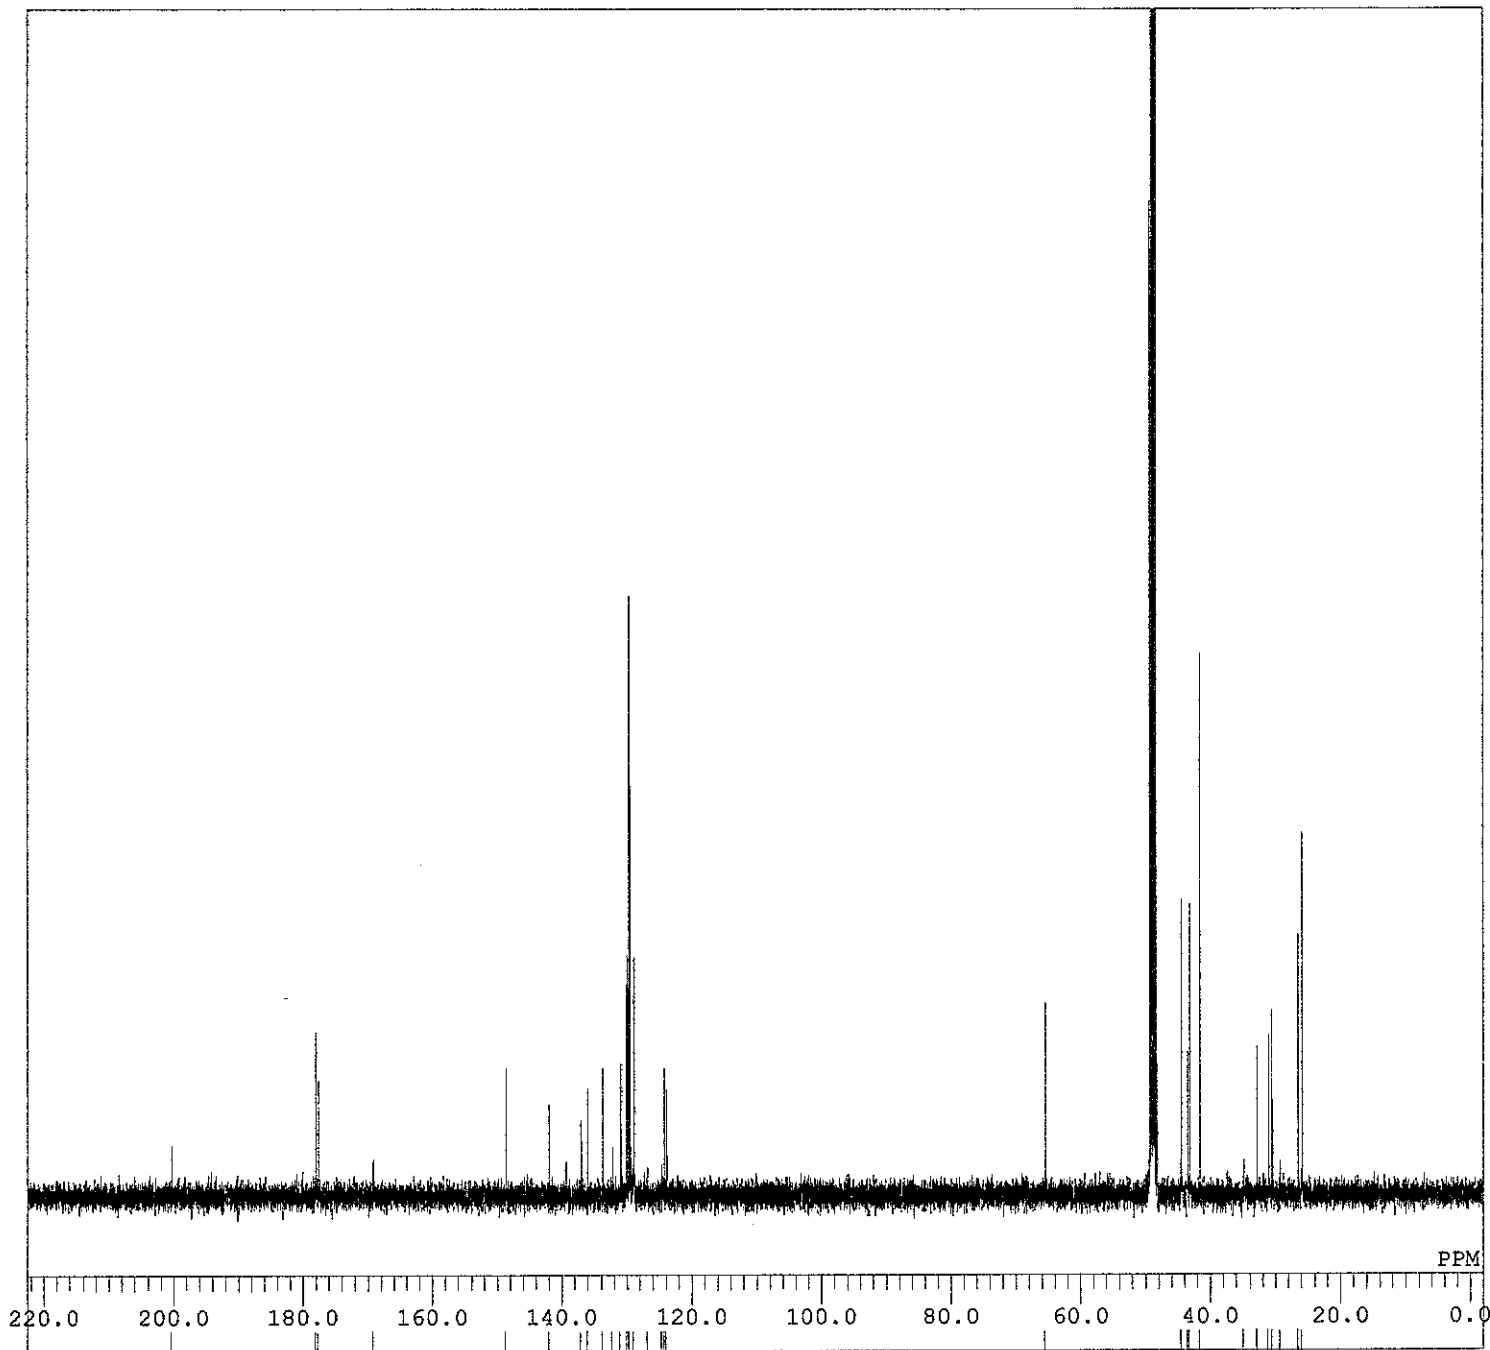

200.2780

178.0194

177.6378

169.1754

148.6947

142.0026

137.0579

136.0430

133.7157

132.2125

130.9992

130.0453

129.6943

129.5036

128.9542

126.7947

124.5818

124.2918

123.8874

65.5509

44.5208

43.5364

43.2388

41.7051

34.9062

32.8077

31.0374

30.5948

30.5033

29.3434

26.5353

25.9325

DFILE 4CNMR.als  
 COMNT  
 DATIM 2015-05-27 22:57:05  
 OBNUC 13C  
 EXMOD carbon.jxp  
 OBFRQ 125.77 MHz  
 OBSET 7.87 KHz  
 OBFIN 4.21 Hz  
 POINT 32768  
 FREQU 31446.54 Hz  
 SCANS 12272  
 ACQTM 1.0420 sec  
 PD 2.0000 sec  
 PW1 3.40 usec  
 IRNUC 1H  
 CTEMP 21.6 c  
 SLVNT CD3OD  
 EXREF 49.00 ppm  
 BF 0.12 Hz  
 RGAIN 74

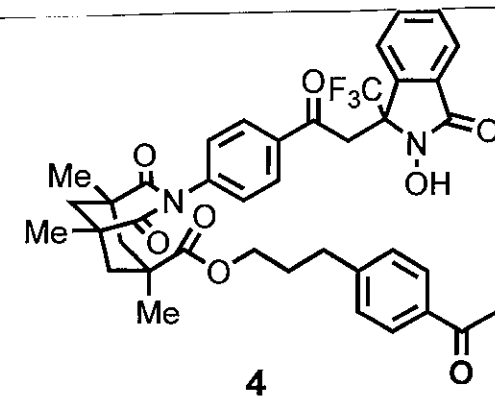

4

DFILE 4 FNMR-1-1.als  
CCMNT  
DATIM 31-05-2015 11:23:39  
OBNUC 19F  
EXMOD proton.jxp  
OBFRQ 368.64 MHz  
OBSET 7.63 KHz  
OBFIN 2.85 Hz  
POINT 13107  
FREQU 149253.73 Hz  
SCANS 8  
ACQTM 0.0878 sec  
PD 5.0000 sec  
PWL 3.90 usec  
IRNUC 19F  
CTEMP 21.6 c  
SLVNT CDCL3  
EXREF -164.90 ppm  
BF 0.12 Hz  
RGAIN 50

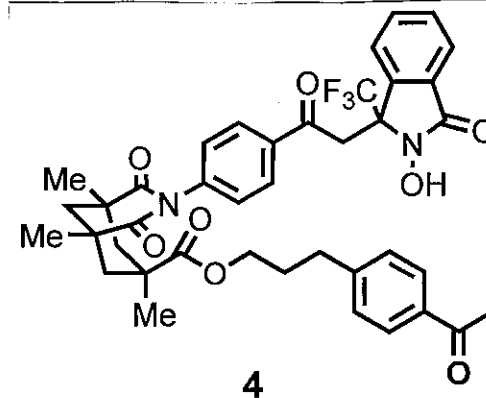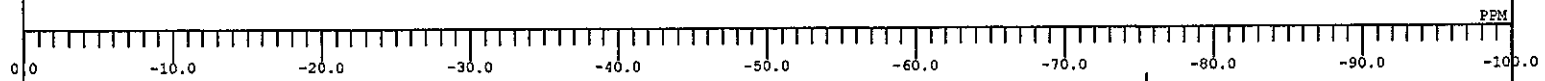

-75.5367

PTLC, 3-octyne

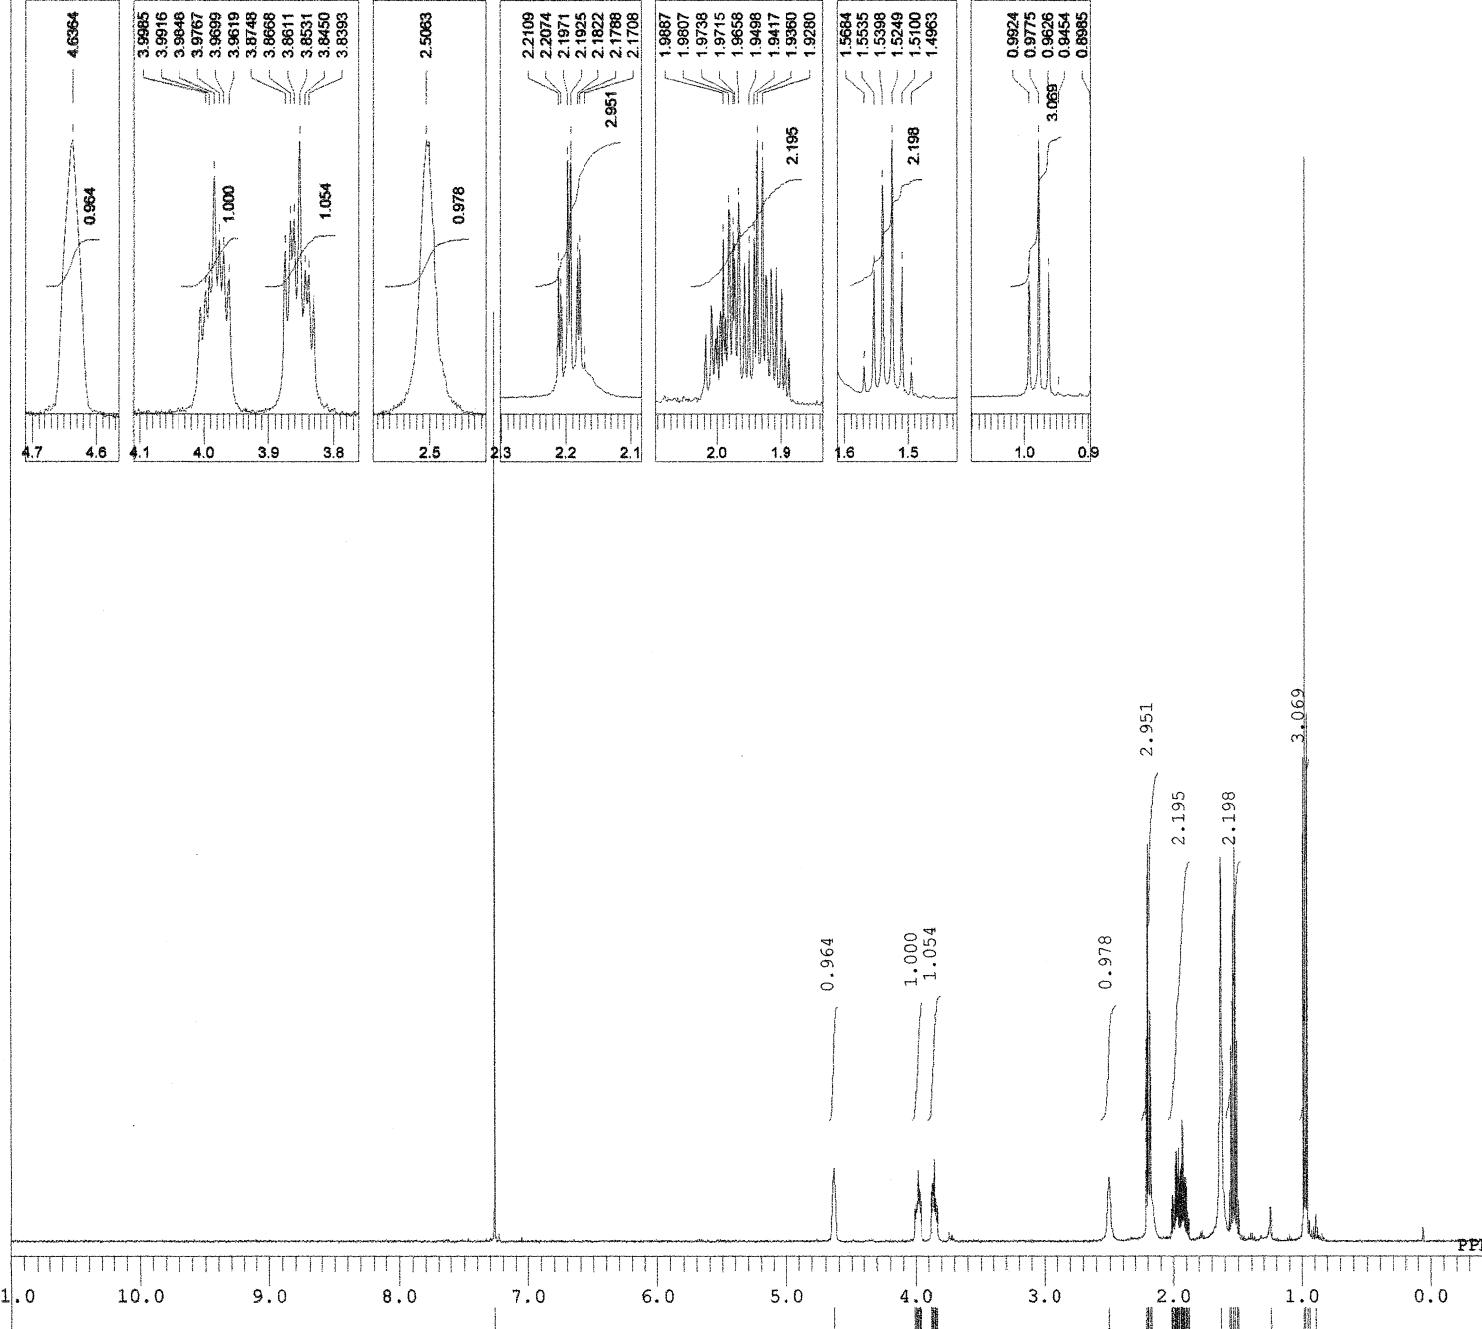

DFILE ozawa08-103.jdf  
 COMNT PTLC, 3-octyne  
 DATIM 2015-09-02 12:52:20  
 OBNUC 1H  
 EXMOD proton.jxp  
 OBFRQ 500.16 MHz  
 OBSET 2.41 KHz  
 OBFIN 6.01 Hz  
 POINT 16384  
 FREQU 9384.38 Hz  
 SCANS 4  
 ACQTM 1.7459 sec  
 PD 5.0000 sec  
 PW1 5.55 usec  
 IRNUC 1H  
 CTEMP 21.2 c  
 SLVNT CDCL3  
 EXREF 7.26 ppm  
 BF 0.10 Hz  
 RGAIN 34

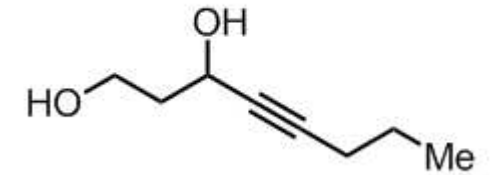

7.2600  
 4.6364  
 4.0065  
 3.9985  
 3.9916  
 3.9848  
 3.9767  
 3.9699  
 3.9619  
 3.8748  
 3.8668  
 3.8611  
 3.8531  
 3.8450  
 3.8393  
 3.8313  
 2.5063  
 2.2109  
 2.2074  
 2.1971  
 2.1925  
 2.1822  
 2.1788  
 2.0173  
 2.0093  
 2.0024  
 2.0001  
 1.9944  
 1.9887  
 1.9853  
 1.9807  
 1.9738  
 1.9715  
 1.9658  
 1.9566  
 1.9498  
 1.9417  
 1.9360  
 1.9280  
 1.9234  
 1.9154  
 1.9074  
 1.8994  
 1.8936  
 1.8856  
 1.6303  
 1.5684  
 1.5535  
 1.5398  
 1.5249  
 1.5100  
 1.4963  
 1.2489  
 0.9924  
 0.9775  
 0.9626  
 0.9454  
 0.8985

4-octyne

DFILE ozawa08-103\_13C\_acetone.jdf  
COMNT 4-octyne  
DATIM 2015-09-16 17:55:18  
OBNUC 13C  
EXMOD carbon.jpg  
OBFRQ 125.77 MHz  
OBSET 7.87 KHz  
OBFIN 4.21 Hz  
POINT 32767  
FREQU 39308.18 Hz  
SCANS 600  
ACQTM 0.8336 sec  
PD 2.0000 sec  
PW1 3.40 usec  
IRNUC 1H  
CTEMP 22.1 c  
SLVNT ACETN  
EXREF 29.84 ppm  
BF 0.12 Hz  
RGAIN 60

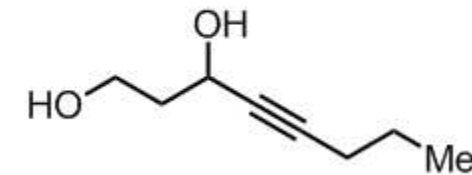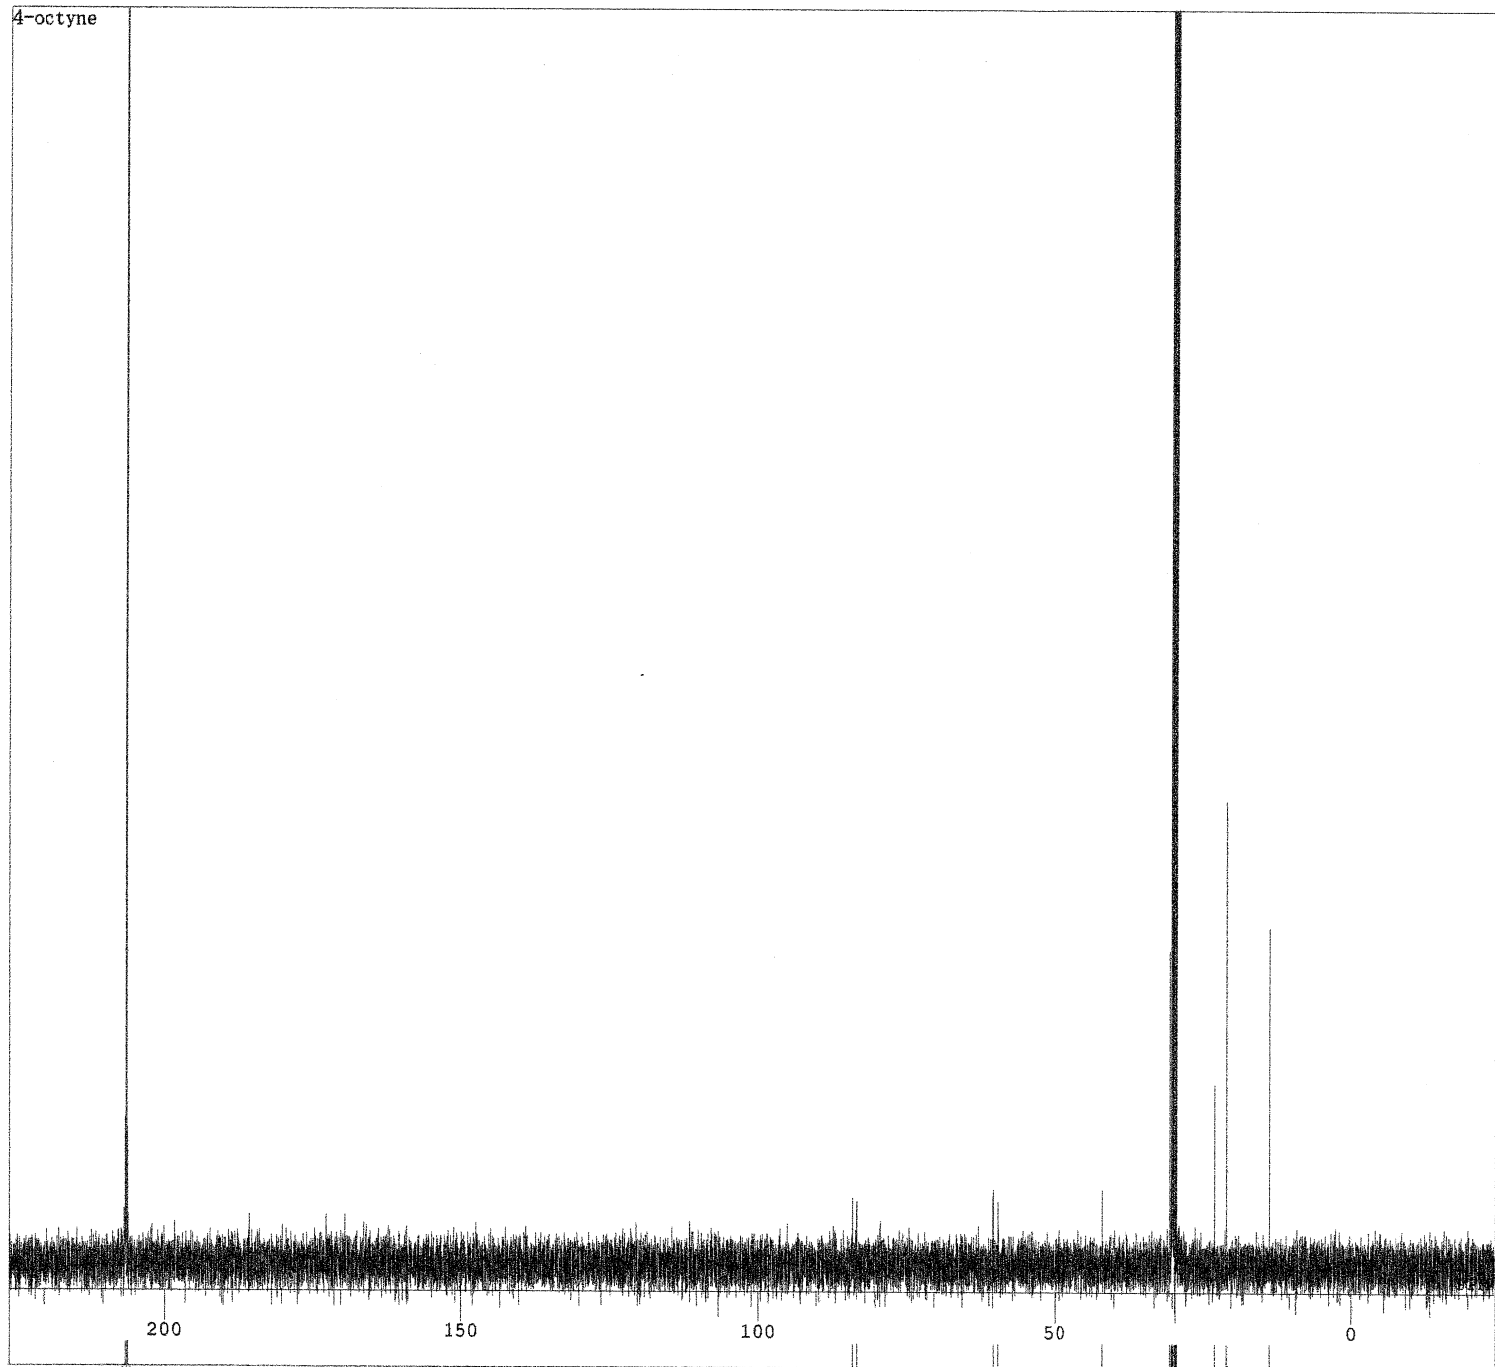

- 206.3659
- 206.2133
- 206.0512
- 84.1799
- 83.3024
- 60.3150
- 59.4851
- 41.9823
- 30.5935
- 30.3074
- 30.1452
- 29.9926
- 29.8400
- 29.6874
- 29.5348
- 29.3822
- 22.9152
- 21.0075
- 13.6248

PTLC, Ts-indole

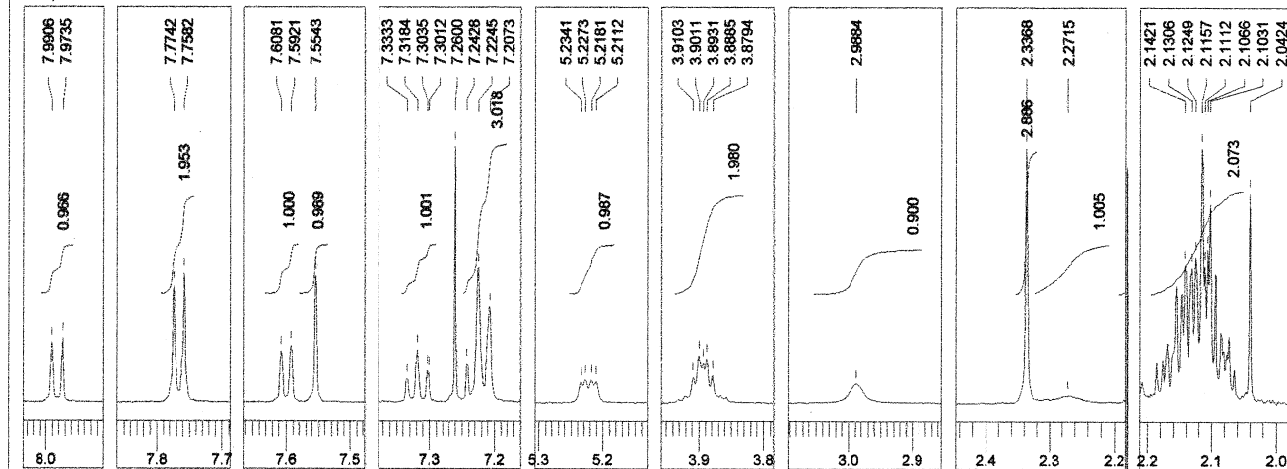

```

DFILE  ozawa08-102.als
COMNT  PTLC, Ts-indole
DATIM  2015-09-02 12:57:14
OBNUC  1H
EXMOD  proton.jxp
OBFRQ  500.16 MHz
OBSET  2.41 KHz
OBFIN  6.01 Hz
POINT  13107
FREQU  7507.51 Hz
SCANS  4
ACQTM  1.7459 sec
PD      5.0000 sec
PW1     5.55 usec
IRNUC  1H
CTEMP  21.2 c
SLVNT  CDCL3
EXREF  7.26 ppm
BF      0.10 Hz
RGAIN  34
    
```

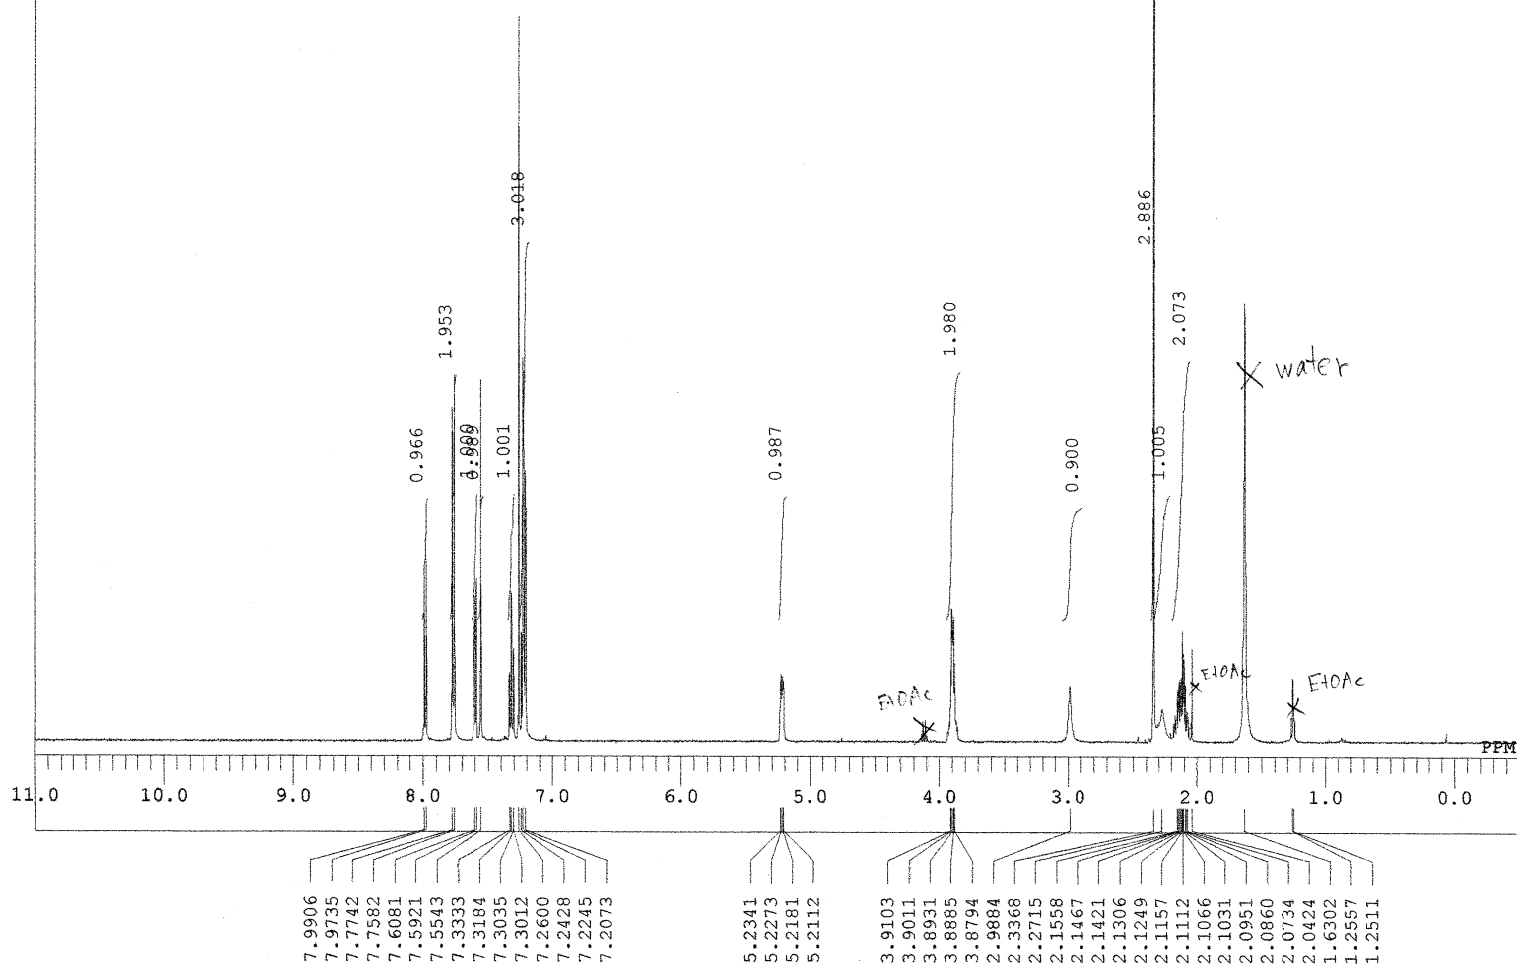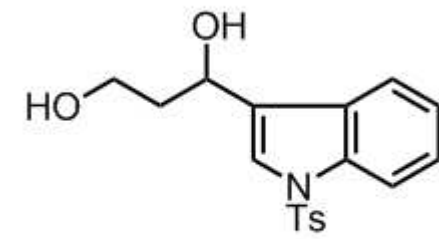

X water  
X EtOAc  
X EtOAc

PTLC, Ts-indole

DFILE ozawa08-102\_13C.jdf  
COMNT PTLC, Ts-indole  
DATIM 2015-09-17 06:41:60  
OBNUC 13C  
EXMOD carbon.jpg  
OBFRQ 125.77 MHz  
OBSET 7.87 KHz  
OBFIN 4.21 Hz  
POINT 32767  
FREQU 39308.18 Hz  
SCANS 2440  
ACQTM 0.8336 sec  
PD 2.0000 sec  
PWL 3.40 usec  
IRNUC 1H  
CTEMP 21.8 c  
SLVNT CDCL3  
EXREF 77.00 ppm  
BF 0.12 Hz  
RGAIN 60

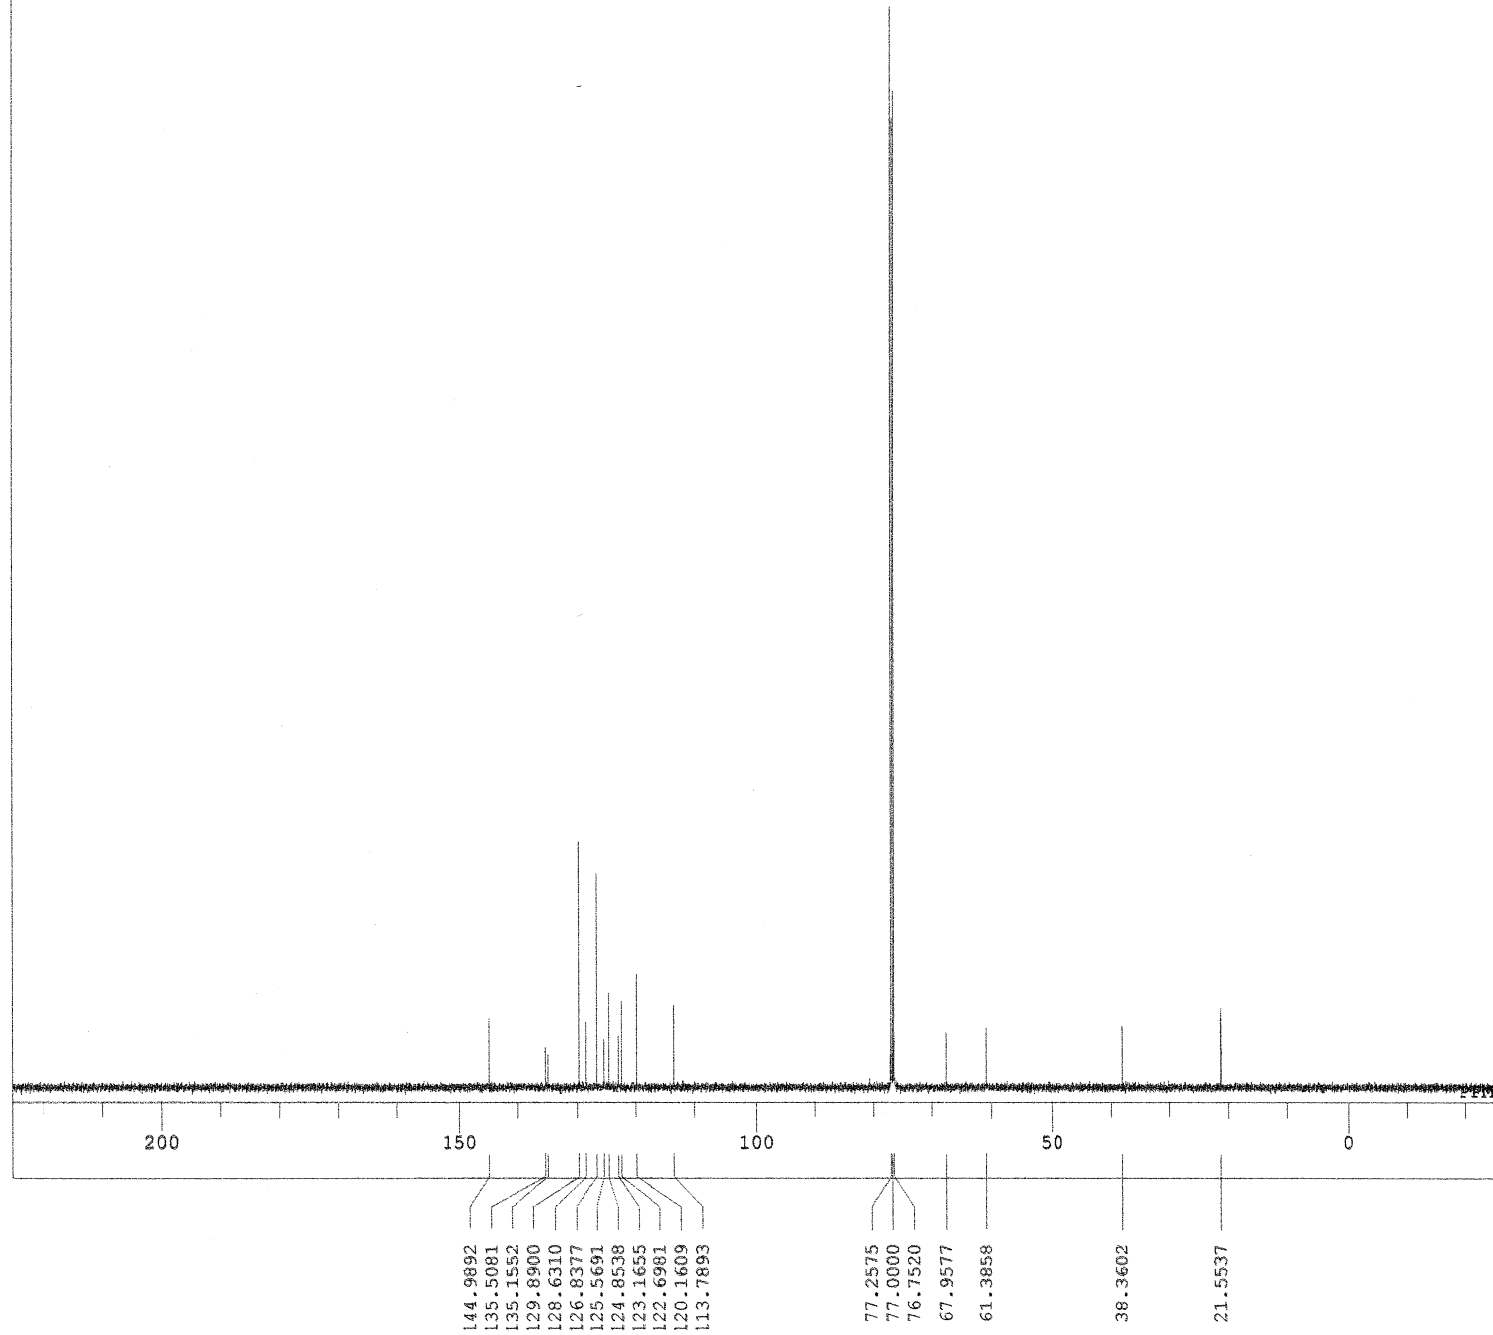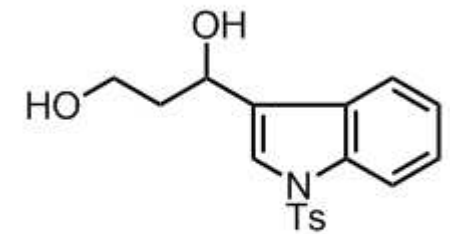

Supplement: SC-007-C5SC04476F-s001.pdf [file SC-007-C5SC04476F-s001.pdf]
